# Supplementary material for: Full length RTN3 regulates turnover of tubular endoplasmic reticulum via selective autophagy
Source: eLife. 2017 Jun 15;6:e25555. doi: 10.7554/eLife.25555 (PMC5517149; doi:10.7554/eLife.25555)
Supplement: Figure 5—source data 1. — IP-interactome analyses were performed using the SILAC-labeling strategy in U2OS after 24-hr treatment with 1 µg/ml of doxycycline. Bafilomycin A1, 200 ng/ml, was added for 2 hr. Peptides with Log2 (Heavy/Light [H/L]) ratios ≥1 and a p value ≤ 0.05 were considered significantly enriched. DOI: http://dx.doi.org/10.7554/eLife.25555.020 [file elife-25555-fig5-data1.xlsx]

## Sheet: Figure 5 – source data 1
log2 Ratio H (RTN1A) / L (HA-empty vector control) normalized RTN1A_01	log2 Ratio H (RTN1A) / L (HA-empty vector control) normalized RTN1A_02	log2 Ratio H (RTN1A) / L (HA-empty vector control) normalized RTN1A_03	log2 Ratio H (RTN2A) / L (HA-empty vector control) normalized RTN2A_01	log2 Ratio H (RTN2A) / L (HA-empty vector control) normalized RTN2A_02	log2 Ratio H (RTN2A) / L (HA-empty vector control) normalized RTN2A_03	log2 Ratio H (RTN3B) / L (HA-empty vector control) normalized RTN3B_01	log2 Ratio H (RTN3B) / L (HA-empty vector control) normalized RTN3B_02	log2 Ratio H (RTN3B) / L (HA-empty vector control) normalized RTN3B_03	log2 Ratio H (RTN4A) / L (HA-empty vector control) normalized RTN4A_01	log2 Ratio H (RTN4A) / L (HA-empty vector control) normalized RTN4A_02	log2 Ratio H (RTN4A) / L (HA-empty vector control) normalized RTN4A_03	T-test Significant_RTN1A	T-test Significant_RTN2A	T-test Significant_RTN3B	T-test Significant_RTN4A	GOBP name	GOMF name	GOCC name	KEGG name	Pfam	Peptides	Razor + unique peptides	Unique peptides	Sequence coverage [%]	Unique + razor sequence coverage [%]	Unique sequence coverage [%]	Mol. weight [kDa]	Score	Intensity	Intensity L	Intensity H	-Log10 T-test p-value_RTN1A	log2 Ratio_RTN1A	-Log10 T-test p-value_RTN2A	log2 Ratio_RTN2A	-Log10 T-test p-value_RTN3B	log2 Ratio_RTN3B	-Log10 T-test p-value_RTN4A	log2 Ratio_RTN4A	Protein IDs	Majority protein IDs	Protein names	Gene names
1.80995	1.7995	1.84575	NaN	2.01532	2.05676	0.537048	1.00727	0.971295	0.877352	0.740021	0.586501	+				activation of immune response;activation of innate immune response;activation of MAPK activity;activation of MAPKK activity;activation of protein kinase activity;aging;anaphase-promoting complex-dependent proteasomal ubiquitin-dependent protein catabolic process;anatomical structure development;anatomical structure morphogenesis;apoptosis;axon guidance;biological regulation;biosynthetic process;c…	adenyl nucleotide binding;adenyl ribonucleotide binding;ATP binding;binding;catalytic activity;cyclin-dependent protein kinase activity;histone kinase activity;kinase activity;nucleotide binding;phosphotransferase activity, alcohol group as acceptor;protein kinase activity;protein serine/threonine kinase activity;purine nucleotide binding;purine ribonucleoside triphosphate binding;purine ribonucl…	cell part;centrosome;cytoplasm;cytoplasmic part;cytoskeletal part;cytosol;extracellular membrane-bounded organelle;extracellular organelle;extracellular region part;extracellular vesicular exosome;intracellular membrane-bounded organelle;intracellular non-membrane-bounded organelle;intracellular organelle;intracellular organelle part;intracellular part;macromolecular complex;membrane;membrane-bou…	Cell cycle;Gap junction;Oocyte meiosis;p53 signaling pathway;Progesterone-mediated oocyte maturation	Pkinase	9	9	8	31.6	31.6	29	34.081	42.657	2043100000	851490000	1191600000	4.1778	1.7184	2.16668	1.93604	1.40448	0.738537	1.76766	0.634624	A0A024QZP7;P06493;E5RIU6;A0A087WZZ9;P06493-2;K7ELV5;E7ESI2;G3V5T9;P24941-2;P24941;Q00526;G3V317;F8VXD2;F8VYH9;F8VZZ0;F8VTV8;F8VWX7;F8VZ51;K7EJ83;H0YAZ9;Q9BVE2;E7EUK8;E5RGN0;A0A087X209;A0A087WZU2;F5H6Z0;J3QSD7;P11802-2;Q00535-2;Q00535;P11802;Q00534;Q96Q40-2;Q96Q40-4;Q96Q40-3;O94921-3;Q96Q40-5;Q96Q40;O94921-2;O94921;Q07002;Q07002-2;Q00536;Q00536-3;Q07002-3;Q00537-2;Q00537;Q00536-2;Q9NYV4-3;Q14004-2…	A0A024QZP7;P06493;E5RIU6;A0A087WZZ9;P06493-2	Cyclin-dependent kinase 1	CDC2;CDK1
1.90993	1.96886	2.63675	1.32002	1.00583	1.08522	-0.515831	0.404794	-0.898592	NaN	NaN	0.0207689					antigen processing and presentation;antigen processing and presentation of exogenous antigen;antigen processing and presentation of exogenous peptide antigen;antigen processing and presentation of exogenous peptide antigen via MHC class II;antigen processing and presentation of peptide antigen;antigen processing and presentation of peptide antigen via MHC class II;antigen processing and presentat…	binding;lipid binding;lipoprotein particle receptor binding;low-density lipoprotein particle receptor binding;peptide binding;protein binding;receptor binding;signal sequence binding;transporter activity	AP-2 adaptor complex;AP-type membrane coat adaptor complex;cell part;clathrin adaptor complex;clathrin coated vesicle membrane;clathrin-coated endocytic vesicle membrane;coated vesicle membrane;cytoplasmic part;cytoplasmic vesicle membrane;cytoplasmic vesicle part;cytosol;endocytic vesicle membrane;extracellular membrane-bounded organelle;extracellular organelle;extracellular region part;extracel…	Endocrine and other factor-regulated calcium reabsorption;Endocytosis;Huntington's disease	Adap_comp_sub;Clat_adaptor_s	13	13	13	32.5	32.5	32.5	49.526	58.914	981540000	446770000	534770000	1.90588	2.07185	2.08767	1.03702	0.424551	-0.436543	0	-0.0792311	A0A087WY71;Q96CW1-2;Q96CW1;E9PFW3;C9JJ47;C9JGT8;C9JJD3;C9JTK4;C9JPV8;H7C4C3	A0A087WY71;Q96CW1-2;Q96CW1;E9PFW3;C9JJ47	AP-2 complex subunit mu	AP2M1
5.47816	3.33328	4.70111	3.8535	3.5764	4.821	4.15939	4.27143	4.29124	2.55932	2.2888	1.62209			+		anion transport;biological regulation;establishment of localization;ion transport;negative regulation of biological process;negative regulation of cellular component organization;negative regulation of cellular process;negative regulation of protein complex assembly;negative regulation of protein polymerization;regulation of biological process;regulation of cellular component biogenesis;regulatio…	anion channel activity;anion transmembrane transporter activity;binding;channel activity;gated channel activity;ion channel activity;ion transmembrane transporter activity;nucleotide binding;passive transmembrane transporter activity;porin activity;substrate-specific channel activity;substrate-specific transmembrane transporter activity;substrate-specific transporter activity;transmembrane transp…	cell part;cytoplasmic part;extracellular membrane-bounded organelle;extracellular organelle;extracellular region part;extracellular vesicular exosome;integral to membrane;intracellular membrane-bounded organelle;intracellular non-membrane-bounded organelle;intracellular organelle;intracellular organelle part;intracellular part;intrinsic to membrane;macromolecular complex;membrane;membrane part;me…	Calcium signaling pathway;Huntington's disease;Parkinson's disease	Porin_3	12	12	12	55	55	55	30.348	323.31	15547000000	1238500000	14308000000	1.70622	4.40418	2.05307	3.98363	4.00762	4.14068	1.74846	2.05674	A0A0A0MR02;P45880-2;P45880;P45880-1;Q5JSD2;Q5JSD1;A2A3S1	A0A0A0MR02;P45880-2;P45880;P45880-1;Q5JSD2;Q5JSD1	Voltage-dependent anion-selective channel protein 2	VDAC2
1.05998	1.14893	1.15911	NaN	0.298776	0.54498	1.89119	1.5773	1.61273	0.867106	0.959993	0.195852	+		+		amine metabolic process;carboxylic acid metabolic process;cellular amine metabolic process;cellular amino acid metabolic process;cellular ketone metabolic process;cellular macromolecule metabolic process;cellular metabolic process;cellular modified amino acid metabolic process;cellular nitrogen compound metabolic process;cellular process;cellular protein metabolic process;coenzyme metabolic proce…	carboxyl-O-methyltransferase activity;catalytic activity;methyltransferase activity;O-methyltransferase activity;protein carboxyl O-methyltransferase activity;protein methyltransferase activity;protein-L-isoaspartate (D-aspartate) O-methyltransferase activity;S-adenosylmethionine-dependent methyltransferase activity;transferase activity;transferase activity, transferring one-carbon groups	cell part;cytoplasm;cytoplasmic part;endoplasmic reticulum;extracellular membrane-bounded organelle;extracellular organelle;extracellular region part;extracellular vesicular exosome;intracellular membrane-bounded organelle;intracellular organelle;intracellular part;membrane-bounded organelle;membrane-bounded vesicle;organelle;vesicle		PCMT	10	10	10	49.1	49.1	49.1	30.315	162.05	4546200000	1502300000	3043900000	3.02386	1.02267	0.633487	0.321878	2.41387	1.59374	0.854555	0.574317	A0A0A0MRJ6;H7BY58;P22061;P22061-2;F6S8N6;C9J0F2;F8WDT3;F8WAV5;F8WAX2;H7C4X2	A0A0A0MRJ6;H7BY58;P22061;P22061-2;F6S8N6	Protein-L-isoaspartate O-methyltransferase;Protein-L-isoaspartate(D-aspartate) O-methyltransferase	PCMT1
1.1159	1.17274	1.28351	0.217851	0.247684	0.224164	NaN	NaN	NaN	NaN	0.211635	0.0419438	+	+			anatomical structure homeostasis;biological regulation;cellular macromolecule metabolic process;cellular metabolic process;cellular nitrogen compound metabolic process;cellular process;homeostatic process;macromolecule metabolic process;metabolic process;multicellular organismal process;ncRNA metabolic process;ncRNA processing;neurological system process;nitrogen compound metabolic process;nuclei…		cell part;intracellular non-membrane-bounded organelle;intracellular organelle;intracellular organelle part;intracellular part;macromolecular complex;non-membrane-bounded organelle;nuclear part;nucleolar part;nucleolus;organelle;organelle part;preribosome;protein complex;Pwp2p-containing subcomplex of 90S preribosome;ribonucleoprotein complex;small-subunit processome	Ribosome biogenesis in eukaryotes	Utp21;WD40	25	25	25	34.3	34.3	34.3	99.365	133.86	3267200000	1665600000	1601600000	2.69261	1.09072	2.31448	0.1299	0	NaN	0.0940436	0.0267895	A0A0A0MTB8;Q8NI36	A0A0A0MTB8;Q8NI36	WD repeat-containing protein 36	WDR36
1.13691	0.906814	1.27447	NaN	0.312549	0.458697	NaN	NaN	NaN	-0.75115	NaN	NaN					biological regulation;biosynthetic process;cell cycle;cell cycle checkpoint;cell cycle phase;cell cycle process;cell division;cellular biosynthetic process;cellular component assembly;cellular component assembly at cellular level;cellular component organization;cellular component organization at cellular level;cellular component organization or biogenesis;cellular component organization or biogen…	acid-amino acid ligase activity;binding;caspase inhibitor activity;caspase regulator activity;catalytic activity;cation binding;chaperone binding;cobalt ion binding;cofactor binding;cysteine-type endopeptidase inhibitor activity;cytoskeletal protein binding;endopeptidase inhibitor activity;endopeptidase regulator activity;enzyme binding;enzyme inhibitor activity;enzyme regulator activity;GTPase b…	cell part;centriole;chromosomal part;chromosome;chromosome passenger complex;chromosome, centromeric region;condensed chromosome kinetochore;cytoplasm;cytoplasmic microtubule;cytoplasmic part;cytoskeletal part;cytosol;interphase microtubule organizing center;intracellular membrane-bounded organelle;intracellular non-membrane-bounded organelle;intracellular organelle;intracellular organelle part;i…	Colorectal cancer;Pathways in cancer	BIR	8	8	8	71.8	71.8	71.8	16.389	38.928	2714800000	954410000	1760300000	1.9518	1.00607	0.797367	0.285623	0	NaN	0	-0.85115	A0A0B4J1S3;O15392-5;O15392-4;O15392;H3BLT4;O15392-2;K7EMW2;O15392-7;O15392-6;O15392-3;K7EP76;K7ELG2	A0A0B4J1S3;O15392-5;O15392-4;O15392;H3BLT4;O15392-2;K7EMW2;O15392-7;O15392-6;O15392-3	Baculoviral IAP repeat-containing protein 5	BIRC5
1.56574	1.17517	1.2756	0.0783365	0.0669503	0.0461418	NaN	NaN	NaN	NaN	0.164529	-0.301035					cellular component assembly;cellular component assembly at cellular level;cellular component organization;cellular component organization at cellular level;cellular component organization or biogenesis;cellular component organization or biogenesis at cellular level;cellular macromolecular complex assembly;cellular macromolecular complex subunit organization;cellular macromolecule metabolic proces…	binding;nucleic acid binding;RNA binding;snoRNA binding	cell part;cytoplasm;intracellular non-membrane-bounded organelle;intracellular organelle;intracellular organelle part;intracellular part;macromolecular complex;non-membrane-bounded organelle;nuclear part;nucleolar part;nucleolus;organelle;organelle part;preribosome;protein complex;Pwp2p-containing subcomplex of 90S preribosome;ribonucleoprotein complex;small-subunit processome	Ribosome biogenesis in eukaryotes	Utp12;WD40	16	16	16	22.7	22.7	22.7	102.45	98.809	2057200000	1085300000	971940000	2.05471	1.23884	1.21023	-0.0361905	0	NaN	0.220717	-0.168253	A0A0B4J2E5;Q15269;C9J544;A0A096LPI6;A0A0J9YX21	A0A0B4J2E5;Q15269	Periodic tryptophan protein 2 homolog	PWP2
3.46205	3.53219	3.10796	4.05467	3.63332	3.23984	1.14945	1.22731	1.12155	NaN	NaN	NaN	+	+	+		biological regulation;cell differentiation;cellular developmental process;cellular process;cellular response to stimulus;developmental process;establishment of localization;establishment of localization in cell;establishment of protein localization;intracellular protein transport;intracellular signal transduction;intracellular transport;metabolic process;nuclear transport;nucleocytoplasmic transp…	binding;catalytic activity;GTP binding;GTPase activity;guanyl nucleotide binding;guanyl ribonucleotide binding;hydrolase activity;hydrolase activity, acting on acid anhydrides;hydrolase activity, acting on acid anhydrides, in phosphorus-containing anhydrides;nucleoside-triphosphatase activity;nucleotide binding;purine nucleotide binding;purine ribonucleoside triphosphate binding;purine ribonucleo…	adherens junction;anchoring junction;cell junction;cell part;cell-substrate adherens junction;cell-substrate junction;cytoplasmic part;endoplasmic reticulum;extracellular membrane-bounded organelle;extracellular organelle;extracellular region part;extracellular vesicular exosome;focal adhesion;intracellular;intracellular membrane-bounded organelle;intracellular organelle;intracellular part;membra…	MAPK signaling pathway;Regulation of actin cytoskeleton;Tight junction	Ras	6	6	4	33.5	33.5	20.2	23.294	55.929	1421800000	394670000	1027200000	2.79297	3.2674	2.35838	3.54261	3.05554	1.0661	0	NaN	A0A0C4DGH2;P62070;P62070-4;E9PK85;P62070-3;P62070-2;E9PQK5;E9PQC5;E9PQ87	A0A0C4DGH2;P62070;P62070-4;E9PK85;P62070-3;P62070-2	Ras-related protein R-Ras2	RRAS2
2.44438	3.6442	2.98289	4.61771	3.54622	5.12056	2.61351	3.14828	3.02684	1.51818	-0.0111227	NaN			+		biosynthetic process;carbohydrate metabolic process;cell activation;cellular biosynthetic process;cellular carbohydrate metabolic process;cellular macromolecule biosynthetic process;cellular macromolecule metabolic process;cellular metabolic process;cellular process;cellular protein metabolic process;cotranslational protein targeting to membrane;defense response;establishment of localization;esta…	catalytic activity;dolichyl-diphosphooligosaccharide-protein glycotransferase activity;oligosaccharyl transferase activity;transferase activity;transferase activity, transferring glycosyl groups;transferase activity, transferring hexosyl groups	cell part;cytoplasmic part;endoplasmic reticulum;endoplasmic reticulum membrane;endoplasmic reticulum part;integral to membrane;intracellular membrane-bounded organelle;intracellular organelle;intracellular organelle part;intracellular part;intrinsic to membrane;macromolecular complex;membrane;membrane part;membrane-bounded organelle;oligosaccharyltransferase complex;organelle;organelle membrane;…	N-Glycan biosynthesis;Protein processing in endoplasmic reticulum;Various types of N-glycan biosynthesis	DDOST_48kD	13	13	13	36	36	36	48.799	162.32	4077700000	386410000	3691300000	1.86039	2.92382	1.94652	4.32816	2.48728	2.82954	0.25981	0.65353	A0A0C4DGS1;P39656;P39656-3;P39656-2;U3KQ84	A0A0C4DGS1;P39656;P39656-3;P39656-2;U3KQ84	Dolichyl-diphosphooligosaccharide--protein glycosyltransferase 48 kDa subunit	DDOST
2.71035	2.80062	2.70918	5.84245	5.91406	5.99544	3.38073	3.20477	3.07217	3.02694	2.91296	2.92617	+	+	+	+					HSP70	44	38	23	79.1	73.5	43.1	70.108	323.31	172610000000	13854000000	158750000000	3.8808	2.64005	4.23876	5.81732	3.08629	3.11922	3.79893	2.85536	A0A0G2JIW1;P0DMV9;P0DMV8;P0DMV8-2;V9GZ37	A0A0G2JIW1;P0DMV9;P0DMV8;P0DMV8-2;V9GZ37	Heat shock 70 kDa protein 1B;Heat shock 70 kDa protein 1A	HSPA1B;HSPA1A
1.27566	1.24221	1.18365	0.473527	0.454808	0.357608	-0.167393	-0.241339	-2.12652	-0.980056	-0.830383	-0.833927	+				anatomical structure development;antibacterial humoral response;antimicrobial humoral response;cellular component assembly;cellular component assembly at cellular level;cellular component organization;cellular component organization at cellular level;cellular component organization or biogenesis;cellular component organization or biogenesis at cellular level;cellular macromolecular complex assemb…	binding;DNA binding;nucleic acid binding	cell part;chromosomal part;extracellular membrane-bounded organelle;extracellular organelle;extracellular region part;extracellular space;extracellular vesicular exosome;intracellular membrane-bounded organelle;intracellular organelle;intracellular organelle part;intracellular part;macromolecular complex;membrane-bounded organelle;membrane-bounded vesicle;nuclear chromosome part;nuclear nucleosom…	Systemic lupus erythematosus	Histone	15	15	0	79.4	79.4	0	13.906	146.68	829110000000	445270000000	383840000000	3.25027	1.13384	1.93029	0.328648	0.555395	-0.945083	2.59949	-0.981455	B2R4S9;P62807;O60814;P57053	B2R4S9;P62807;O60814;P57053	Histone H2B;Histone H2B type 1-C/E/F/G/I;Histone H2B type 1-K;Histone H2B type F-S	HIST1H2BI;HIST1H2BC;HIST1H2BK;H2BFS
NaN	1.32918	1.32112	6.17259	5.21486	2.24598	1.73613	2.32783	2.00623	NaN	0.893284	0.330788	+				biosynthetic process;cellular biosynthetic process;cellular macromolecule biosynthetic process;cellular macromolecule metabolic process;cellular metabolic process;cellular process;cellular protein metabolic process;establishment of localization;establishment of localization in cell;intracellular transport;macromolecule biosynthetic process;macromolecule metabolic process;metabolic process;mitocho…	structural constituent of ribosome;structural molecule activity	cell part;cytoplasmic part;integral to membrane;intracellular membrane-bounded organelle;intracellular non-membrane-bounded organelle;intracellular organelle;intracellular organelle part;intracellular part;intrinsic to membrane;macromolecular complex;membrane;membrane part;membrane-bounded organelle;mitochondrial membrane;mitochondrial part;mitochondrion;non-membrane-bounded organelle;organelle;o…		Mito_carr;Ribosomal_L12	16	16	0	39.4	39.4	0	48.099	289.25	4543800000	939610000	3604200000	2.67895	1.22515	1.19372	4.44448	2.10713	1.9234	0.495169	0.512036	B4DLN1;F6QW41	B4DLN1
4.07408	5.06398	6.22697	4.70636	5.09508	5.3107	3.15301	3.19857	3.47897	NaN	NaN	NaN		+	+		biological regulation;catabolic process;cellular catabolic process;cellular macromolecule catabolic process;cellular macromolecule metabolic process;cellular metabolic process;cellular process;cellular response to chemical stimulus;cellular response to organic substance;cellular response to stimulus;cellular response to stress;cellular response to topologically incorrect protein;cellular response…	binding;enzyme binding;MHC class I protein binding;MHC protein binding;protease binding;protein binding;receptor activity;receptor binding	cell part;cytoplasmic part;cytoplasmic ubiquitin ligase complex;early endosome;endoplasmic reticulum;endoplasmic reticulum part;endosome;ER ubiquitin ligase complex;Hrd1p ubiquitin ligase complex;integral to endoplasmic reticulum membrane;integral to membrane;integral to organelle membrane;intracellular membrane-bounded organelle;intracellular organelle;intracellular organelle part;intracellular …	Amyotrophic lateral sclerosis (ALS);Protein processing in endoplasmic reticulum	DER1	5	5	5	36.4	36.4	36.4	17.033	18.231	2146700000	127410000	2019300000	1.82376	5.02168	2.89273	4.93738	2.98821	3.17685	0	NaN	B4E1G1;Q9BUN8-2;Q9BUN8;E5RGY0	B4E1G1;Q9BUN8-2;Q9BUN8;E5RGY0	Derlin-1	DERL1
2.39767	2.17329	2.72325	4.28917	4.8124	4.59741	NaN	NaN	1.97475	0.765704	NaN	0.67084	+	+			biological regulation;biosynthetic process;cellular biosynthetic process;cellular macromolecule biosynthetic process;cellular macromolecule metabolic process;cellular metabolic process;cellular process;cellular protein metabolic process;cellular response to chemical stimulus;cellular response to organic substance;cellular response to stimulus;cellular response to stress;cellular response to topol…		cell part;cytoplasmic part;endoplasmic reticulum;endoplasmic reticulum membrane;endoplasmic reticulum part;integral to membrane;intracellular membrane-bounded organelle;intracellular organelle;intracellular organelle part;intracellular part;intrinsic to membrane;membrane;membrane part;membrane-bounded organelle;organelle;organelle membrane;organelle part	Protein processing in endoplasmic reticulum	TRAP_alpha	2	2	2	8.7	8.7	8.7	29.573	15.46	1381700000	215500000	1166200000	2.33191	2.3314	2.93788	4.46633	0	1.87475	1.31208	0.618272	C9J3L8;C9J5W0;E9PAL7;C9IZQ1;P43307-2;P43307	C9J3L8;C9J5W0;E9PAL7;C9IZQ1;P43307-2;P43307	Translocon-associated protein subunit alpha	SSR1
2.67073	2.84766	2.51437	NaN	2.21614	1.39955	3.11936	2.85625	3.09452	1.95877	NaN	1.9651	+		+		actin cytoskeleton organization;actin filament-based process;biological regulation;cellular component organization;cellular component organization at cellular level;cellular component organization or biogenesis;cellular component organization or biogenesis at cellular level;cellular process;cytoskeleton organization;negative regulation of actin filament polymerization;negative regulation of biolo…	actin binding;actin monomer binding;adenyl nucleotide binding;adenyl-nucleotide exchange factor activity;ATPase regulator activity;binding;cytoskeletal protein binding;enzyme regulator activity;lipid binding;nucleoside-triphosphatase regulator activity;nucleotide binding;phosphatidylinositol binding;phosphatidylinositol-4,5-bisphosphate binding;phospholipid binding;protein binding;purine nucleoti…	axon part;cell part;cell projection part;cytoplasm;cytoskeleton;extracellular membrane-bounded organelle;extracellular organelle;extracellular region part;extracellular vesicular exosome;intracellular non-membrane-bounded organelle;intracellular organelle;intracellular part;membrane-bounded organelle;membrane-bounded vesicle;non-membrane-bounded organelle;organelle;synapse part;terminal button;ve…	Regulation of actin cytoskeleton;Shigellosis	Profilin	4	4	1	53.8	53.8	8.8	9.7982	23.313	716820000	145160000	571650000	2.85634	2.57759	0.825671	1.70785	3.08509	2.92338	2.96555	1.86193	C9J712;P35080	C9J712;P35080	Profilin-2	PFN2
3.02515	2.60372	NaN	NaN	2.19991	NaN	NaN	2.08974	NaN	NaN	NaN	NaN					biological regulation;cation homeostasis;cation transport;cellular cation homeostasis;cellular chemical homeostasis;cellular divalent inorganic cation homeostasis;cellular homeostasis;cellular ion homeostasis;cellular process;cellular zinc ion homeostasis;chemical homeostasis;divalent inorganic cation homeostasis;divalent inorganic cation transport;divalent metal ion transport;establishment of lo…	cation transmembrane transporter activity;divalent inorganic cation transmembrane transporter activity;ferrous iron transmembrane transporter activity;inorganic cation transmembrane transporter activity;ion transmembrane transporter activity;iron ion transmembrane transporter activity;metal ion transmembrane transporter activity;substrate-specific transmembrane transporter activity;substrate-spec…	cell part;cell projection;cytoplasmic part;endoplasmic reticulum;Golgi apparatus;integral to membrane;integral to plasma membrane;intracellular membrane-bounded organelle;intracellular organelle;intracellular part;intrinsic to membrane;intrinsic to plasma membrane;lamellipodium;membrane;membrane part;membrane-bounded organelle;organelle;plasma membrane;plasma membrane part		Zip	3	3	3	29	29	29	17	56.834	1151600000	190090000	961460000	1.30697	2.71443	0	2.09991	0	1.98974	0	NaN	E5RIP4;Q15043-2;Q15043-3;Q15043;E5RFZ8;E5RGA7;E5RJ40;E5RJG5	E5RIP4;Q15043-2;Q15043-3;Q15043;E5RFZ8;E5RGA7;E5RJ40;E5RJG5	Zinc transporter ZIP14	SLC39A14
1.18846	1.01042	1.10963	NaN	1.00877	1.11663	NaN	1.12102	0.702214	-0.176854	-0.307609	NaN	+				activation of immune response;activation of innate immune response;anaphase-promoting complex-dependent proteasomal ubiquitin-dependent protein catabolic process;biological regulation;catabolic process;cell cycle;cell cycle process;cell surface receptor linked signaling pathway;cellular catabolic process;cellular component organization;cellular component organization at cellular level;cellular co…	acid-amino acid ligase activity;catalytic activity;ligase activity;ligase activity, forming carbon-nitrogen bonds;small conjugating protein ligase activity;ubiquitin-protein ligase activity	cell part;Cul7-RING ubiquitin ligase complex;cullin-RING ubiquitin ligase complex;cytoplasmic part;cytosol;extracellular membrane-bounded organelle;extracellular organelle;extracellular region part;extracellular vesicular exosome;intracellular organelle part;intracellular part;macromolecular complex;membrane-bounded organelle;membrane-bounded vesicle;nuclear part;nucleoplasm;organelle;organelle p…	Cell cycle;Cell cycle - yeast;Circadian rhythm - mammal;Oocyte meiosis;Protein processing in endoplasmic reticulum;TGF-beta signaling pathway;Ubiquitin mediated proteolysis;Wnt signaling pathway	Skp1;Skp1_POZ	5	5	5	30.1	30.1	30.1	18.72	15.796	916220000	420910000	495300000	2.58042	1.00284	1.44825	0.962702	0.793861	0.811615	0.920214	-0.342231	E5RJR5;P63208;E7ERH2;F8W8N3;P63208-2;E5RGM3	E5RJR5;P63208;E7ERH2;F8W8N3;P63208-2	S-phase kinase-associated protein 1	SKP1
1.27983	1.05665	1.44996	1.48166	1.53784	1.59832	1.37662	1.8031	0.894682	NaN	0.817705	-0.160943		+			biological regulation;biosynthetic process;cellular biosynthetic process;cellular macromolecule biosynthetic process;cellular macromolecule metabolic process;cellular metabolic process;cellular nitrogen compound metabolic process;cellular process;cellular protein metabolic process;cellular response to abiotic stimulus;cellular response to ionizing radiation;cellular response to radiation;cellular…	activating transcription factor binding;binding;DNA binding;heat shock protein binding;molecular transducer activity;nucleic acid binding;protein binding;RNA binding;signal transducer activity;transcription factor binding;translation elongation factor activity;translation factor activity, nucleic acid binding	cell part;cytoplasm;cytoplasmic part;cytosol;eukaryotic translation elongation factor 1 complex;intracellular membrane-bounded organelle;intracellular non-membrane-bounded organelle;intracellular organelle;intracellular organelle part;intracellular part;macromolecular complex;membrane-bounded organelle;non-membrane-bounded organelle;nuclear part;nucleolus;nucleus;organelle;organelle part;protein …		EF-1_beta_acid;EF1_GNE	8	8	8	40.6	40.6	40.6	28.821	54.933	1566800000	587730000	979040000	2.02382	1.16215	3.26181	1.43927	1.38879	1.25814	0.141461	0.228381	E9PK01;P29692;A0A087X1X7;E9PRY8;P29692-3;P29692-2;E9PPR1;E9PL12;E9PQ49;E9PI39;E9PMW7;E9PL71;E9PQZ1;P29692-4;E9PN91;E9PIZ1;H0YCK7;E9PK06;E9PQC9;E9PKK3;E9PK72;H0YE58;H0YE72;E9PNW6;E9PJD0	E9PK01;P29692;A0A087X1X7;E9PRY8;P29692-3;P29692-2;E9PPR1;E9PL12;E9PQ49;E9PI39;E9PMW7;E9PL71;E9PQZ1;P29692-4;E9PN91;E9PIZ1;H0YCK7	Elongation factor 1-delta	EEF1D
4.76808	4.75686	3.54683	6.1765	5.05242	4.92571	3.55692	3.99521	3.59371	3.03963	NaN	NaN		+	+		amine transport;amino acid import;amino acid transport;aromatic amino acid transport;biological regulation;blood coagulation;branched-chain aliphatic amino acid transport;calcium ion transport;carbohydrate metabolic process;carboxylic acid transport;cation transport;cell growth;cell migration;cell motility;cellular component movement;cellular process;coagulation;divalent inorganic cation transpor…	active transmembrane transporter activity;amine transmembrane transporter activity;amino acid transmembrane transporter activity;antiporter activity;binding;calcium ion transmembrane transporter activity;calcium:cation antiporter activity;calcium:sodium antiporter activity;carboxylic acid transmembrane transporter activity;catalytic activity;cation binding;cation transmembrane transporter activit…	apical plasma membrane;cell part;cell surface;cytoplasm;cytoplasmic membrane-bounded vesicle;cytoplasmic part;cytoplasmic vesicle;extracellular membrane-bounded organelle;extracellular organelle;extracellular region part;extracellular vesicular exosome;integral to membrane;intracellular membrane-bounded organelle;intracellular organelle;intracellular organelle part;intracellular part;intrinsic to…	Protein digestion and absorption	Alpha-amylase	20	20	20	37.6	37.6	37.6	64.872	184.84	5709200000	385710000	5323400000	2.04872	4.25726	2.25106	5.28488	2.82273	3.61528	0	2.93963	F5GZS6;J3KPF3;P08195-2;P08195-3;P08195;P08195-4;H0YFS2;F5H0E2;F5GZI0;F5H867;H0YFX4;F5GZR9	F5GZS6;J3KPF3;P08195-2;P08195-3;P08195;P08195-4	4F2 cell-surface antigen heavy chain	SLC3A2
1.31028	2.04369	2.06936	2.89585	2.32746	2.3888	1.50416	1.53162	1.64446	NaN	NaN	NaN		+	+		10-formyltetrahydrofolate biosynthetic process;10-formyltetrahydrofolate metabolic process;amine biosynthetic process;amine metabolic process;anatomical structure development;anatomical structure formation involved in morphogenesis;aromatic compound biosynthetic process;aspartate family amino acid biosynthetic process;aspartate family amino acid metabolic process;biosynthetic process;carboxylic a…	adenyl nucleotide binding;adenyl ribonucleotide binding;ATP binding;binding;catalytic activity;cyclohydrolase activity;formate-tetrahydrofolate ligase activity;hydrolase activity;hydrolase activity, acting on carbon-nitrogen (but not peptide) bonds;hydrolase activity, acting on carbon-nitrogen (but not peptide) bonds, in cyclic amidines;ligase activity;ligase activity, forming carbon-nitrogen bon…	cell part;cytoplasmic part;cytosol;extracellular membrane-bounded organelle;extracellular organelle;extracellular region part;extracellular vesicular exosome;intracellular membrane-bounded organelle;intracellular organelle;intracellular part;membrane;membrane-bounded organelle;membrane-bounded vesicle;mitochondrion;organelle;vesicle	One carbon pool by folate	FTHFS;THF_DHG_CYH;THF_DHG_CYH_C	13	13	13	18.1	18.1	18.1	110.61	87.797	884930000	361600000	523330000	1.68653	1.70778	2.2663	2.43737	3.06386	1.46008	0	NaN	F5H2F4;P11586;V9GYY3	F5H2F4;P11586	C-1-tetrahydrofolate synthase, cytoplasmic;Methylenetetrahydrofolate dehydrogenase;Methenyltetrahydrofolate cyclohydrolase;Formyltetrahydrofolate synthetase;C-1-tetrahydrofolate synthase, cytoplasmic, N-terminally processed	MTHFD1
1.69484	1.56628	1.38245	5.16712	3.75841	5.19322	0.31487	1.41381	1.37468	0.764856	0.373843	1.20151	+				cellular macromolecule metabolic process;cellular metabolic process;cellular nitrogen compound metabolic process;cellular process;macromolecule metabolic process;metabolic process;ncRNA 3'-end processing;ncRNA metabolic process;ncRNA processing;nitrogen compound metabolic process;nucleic acid metabolic process;nucleobase-containing compound metabolic process;primary metabolic process;RNA 3'-end p…	binding;nucleic acid binding;RNA binding;tRNA binding	cell part;cytoplasmic part;intracellular membrane-bounded organelle;intracellular organelle;intracellular organelle lumen;intracellular organelle part;intracellular part;membrane-bounded organelle;membrane-enclosed lumen;mitochondrial matrix;mitochondrial part;mitochondrion;organelle;organelle lumen;organelle part		PPR;PPR_2;PPR_3;WRW	8	8	6	11.3	11.3	8.1	84.109	24.549	1998600000	260650000	1737900000	2.40927	1.44785	1.98201	4.60625	0.914153	0.934453	0.980728	0.680069	G3V325;O75127;C9JJT5;P56134-4;P56134-2;C9JU26;C9JGL8	G3V325;O75127	Pentatricopeptide repeat-containing protein 1, mitochondrial	ATP5J2-PTCD1;PTCD1
2.33999	3.05134	3.3041	NaN	2.51485	NaN	NaN	NaN	1.89983	NaN	NaN	NaN					catabolic process;cellular catabolic process;cellular macromolecule catabolic process;cellular macromolecule metabolic process;cellular metabolic process;cellular nitrogen compound metabolic process;cellular process;cleavage involved in rRNA processing;DNA catabolic process;DNA catabolic process, exonucleolytic;DNA metabolic process;exonucleolytic trimming involved in rRNA processing;exonucleolyt…	3'-5' exonuclease activity;3'-5'-exoribonuclease activity;binding;catalytic activity;cation binding;exonuclease activity;exonuclease activity, active with either ribo- or deoxyribonucleic acids and producing 5'-phosphomonoesters;exoribonuclease activity;exoribonuclease activity, producing 5'-phosphomonoesters;hydrolase activity;hydrolase activity, acting on ester bonds;ion binding;metal ion bindi…	cell part;cytoplasm;intracellular non-membrane-bounded organelle;intracellular organelle;intracellular organelle part;intracellular part;non-membrane-bounded organelle;nuclear part;nucleolus;organelle;organelle part		RNase_T	4	4	4	28.4	28.4	28.4	22.89	13.546	396150000	91422000	304730000	1.98006	2.79848	0	2.41485	0	1.79983	0	NaN	H0Y4B0;O43414-3;O43414-2;O43414;F6QUN3;F6UGJ8	H0Y4B0;O43414-3;O43414-2;O43414;F6QUN3;F6UGJ8	ERI1 exoribonuclease 3	ERI3
1.98987	1.84804	2.19125	NaN	1.08767	1.00065	-0.802361	1.01243	1.64201	-0.526888	0.215865	NaN	+				amine biosynthetic process;amine metabolic process;apoptosis;biological regulation;biosynthetic process;carboxylic acid biosynthetic process;carboxylic acid metabolic process;cell death;cellular amine metabolic process;cellular amino acid biosynthetic process;cellular amino acid metabolic process;cellular biosynthetic process;cellular ketone metabolic process;cellular macromolecule metabolic proc…	binding;nucleic acid binding;protein binding;protein N-terminus binding;ribonucleoprotein binding;ribosome binding;RNA binding;snRNA binding;translation elongation factor activity;translation factor activity, nucleic acid binding;U6 snRNA binding	annulate lamellae;cell part;cytoplasm;cytoplasmic part;cytosol;endoplasmic reticulum membrane;endoplasmic reticulum part;extracellular membrane-bounded organelle;extracellular organelle;extracellular region part;extracellular vesicular exosome;intracellular membrane-bounded organelle;intracellular organelle;intracellular organelle part;intracellular part;macromolecular complex;membrane;membrane p…		eIF-5a	12	12	12	70.7	70.7	70.7	16.118	323.31	3979400000	3513600000	465830000	2.56743	1.90972	1.5329	0.944158	0.25702	0.517358	0.210172	-0.255512	I3L397;I3L504;P63241;P63241-2;Q6IS14;F8WCJ1;C9J7B5;C9J4W5;Q9GZV4	I3L397;I3L504;P63241;P63241-2	Eukaryotic translation initiation factor 5A;Eukaryotic translation initiation factor 5A-1	EIF5A
1.60829	1.25671	1.41819	0.627887	0.732139	0.606348	NaN	NaN	-1.59688	-0.982705	-0.877155	-0.6474		+			biological regulation;negative regulation of biological process;negative regulation of biosynthetic process;negative regulation of cellular biosynthetic process;negative regulation of cellular macromolecule biosynthetic process;negative regulation of cellular metabolic process;negative regulation of cellular process;negative regulation of gene expression;negative regulation of macromolecule biosy…	binding;chromatin binding;enzyme binding;protein binding	cell part;centromeric heterochromatin;chromatin;chromocenter;chromosomal part;chromosome, centromeric region;cytoskeletal part;female pronucleus;heterochromatin;intracellular membrane-bounded organelle;intracellular non-membrane-bounded organelle;intracellular organelle;intracellular organelle part;intracellular part;male pronucleus;membrane-bounded organelle;non-membrane-bounded organelle;nuclea…		Chromo;Chromo_shadow	9	9	8	55.2	55.2	46	20.127	172.65	10484000000	5106900000	5376800000	2.23619	1.32773	2.31388	0.555458	0	-1.69688	1.95842	-0.935753	J3KS05;P83916;B5MD17;K7ELA4;C9JWS9	J3KS05;P83916;B5MD17;K7ELA4;C9JWS9	Chromobox protein homolog 1	CBX1
1.55208	1.58342	1.56638	1.86414	1.90045	1.86643	-7.21485e-05	0.175684	0.203139	0.847997	0.923948	NaN	+	+			axon guidance;biological regulation;blood coagulation;carbohydrate transport;cell differentiation;cell migration;cell motility;cell surface receptor linked signaling pathway;cellular component movement;cellular developmental process;cellular macromolecule metabolic process;cellular metabolic process;cellular process;cellular protein metabolic process;cellular response to chemical stimulus;cellula…	adenyl nucleotide binding;adenyl ribonucleotide binding;ATP binding;binding;catalytic activity;enzyme binding;ion channel binding;kinase activity;non-membrane spanning protein tyrosine kinase activity;nucleotide binding;phosphotransferase activity, alcohol group as acceptor;protein binding;protein kinase activity;protein tyrosine kinase activity;purine nucleotide binding;purine ribonucleoside tri…	actin filament;adherens junction;anchoring junction;cell junction;cell part;cell-substrate adherens junction;cell-substrate junction;cytoplasm;cytoplasmic part;cytoskeletal part;cytosol;extracellular membrane-bounded organelle;extracellular organelle;extracellular region part;extracellular vesicular exosome;extrinsic to internal side of plasma membrane;extrinsic to membrane;extrinsic to plasma me…	Adherens junction;Tight junction	Pkinase_Tyr;SH2;SH3_1	16	16	11	39.1	39.1	30.1	61.386	160.39	5212900000	2687700000	2525200000	4.41891	1.46729	4.36001	1.77701	0.142628	0.0262502	1.51236	0.785972	J3QRU1;P07947;P06241-3;P06241-2;P06241;H0Y3C5;J3KPD6;P08631-3;P08631-2;P08631-4;P08631;E5RFS5;Q5TGY6;Q573B4;P06239;P09769;P06239-3	J3QRU1;P07947	Non-specific protein-tyrosine kinase;Tyrosine-protein kinase Yes	YES1
1.25713	1.76358	1.9875	NaN	1.19137	0.723515	NaN	NaN	0.2929	-0.225464	NaN	NaN					antigen processing and presentation;antigen processing and presentation of exogenous antigen;antigen processing and presentation of exogenous peptide antigen;antigen processing and presentation of exogenous peptide antigen via MHC class II;antigen processing and presentation of peptide antigen;antigen processing and presentation of peptide antigen via MHC class II;antigen processing and presentat…	protein transporter activity;substrate-specific transporter activity;transporter activity	AP-2 adaptor complex;AP-type membrane coat adaptor complex;cell part;clathrin adaptor complex;clathrin coated vesicle membrane;clathrin-coated endocytic vesicle membrane;coated vesicle membrane;cytoplasmic part;cytoplasmic vesicle membrane;cytoplasmic vesicle part;cytosol;endocytic vesicle membrane;intracellular organelle part;intracellular part;macromolecular complex;membrane;membrane part;organ…	Endocrine and other factor-regulated calcium reabsorption;Endocytosis;Huntington's disease	Clat_adaptor_s	5	5	5	29.1	29.1	29.1	18.929	10.717	753550000	468620000	284930000	1.73456	1.56941	0.770684	0.857444	0	0.1929	0	-0.325464	M0QYZ2;M0R0N4;P53680;M0QZ21;X6R390;P53680-2;M0R1S0	M0QYZ2;M0R0N4;P53680;M0QZ21;X6R390;P53680-2	AP-2 complex subunit sigma	AP2S1
4.96454	NaN	5.15125	NaN	5.77146	5.62764	3.35417	3.00135	3.3113	1.10842	NaN	NaN			+		axon guidance;chemotaxis;locomotion;response to chemical stimulus;response to external stimulus;response to stimulus;taxis	binding;cation binding;heme binding;ion binding;iron ion binding;lipid binding;metal ion binding;steroid binding;tetrapyrrole binding;transition metal ion binding	cell part;cytoplasmic part;endoplasmic reticulum;endoplasmic reticulum membrane;endoplasmic reticulum part;extracellular membrane-bounded organelle;extracellular organelle;extracellular region part;extracellular vesicular exosome;integral to membrane;intracellular membrane-bounded organelle;intracellular non-membrane-bounded organelle;intracellular organelle;intracellular organelle part;intracell…		Cyt-b5	12	12	11	47.7	47.7	43.1	21.671	60.451	4754000000	310410000	4443600000	1.92132	4.95789	2.08749	5.59955	2.89793	3.12227	0	1.00842	O00264;O00264-2;U3KQM0	O00264;O00264-2	Membrane-associated progesterone receptor component 1	PGRMC1
NaN	2.08529	2.04208	NaN	NaN	4.29337	2.52062	2.48563	2.35098	1.7208	NaN	1.78052			+		cellular metabolic process;cellular process;electron transport chain;generation of precursor metabolites and energy;metabolic process;mitochondrial electron transport, NADH to ubiquinone;oxidation-reduction process;respiratory electron transport chain;small molecule metabolic process	binding;catalytic activity;NADH dehydrogenase (quinone) activity;NADH dehydrogenase (ubiquinone) activity;NADH dehydrogenase activity;oxidoreductase activity;oxidoreductase activity, acting on NADH or NADPH;oxidoreductase activity, acting on NADH or NADPH, quinone or similar compound as acceptor;protein binding;protein complex binding	cell part;cytoplasmic part;extracellular membrane-bounded organelle;extracellular organelle;extracellular region part;extracellular vesicular exosome;intracellular membrane-bounded organelle;intracellular organelle;intracellular organelle part;intracellular part;macromolecular complex;membrane;membrane part;membrane-bounded organelle;membrane-bounded vesicle;mitochondrial inner membrane;mitochond…	Alzheimer's disease;Huntington's disease;Oxidative phosphorylation;Parkinson's disease	B12D	5	5	5	55.6	55.6	55.6	9.3697	11.854	505370000	117670000	387700000	2.15471	1.96369	0	4.19337	3.31615	2.35241	1.93876	1.65066	O00483	O00483	Cytochrome c oxidase subunit NDUFA4	NDUFA4
1.02489	1.16343	1.31939	0.258579	0.324465	0.342441	NaN	NaN	NaN	-0.399768	-0.455277	-0.464047					cellular macromolecule metabolic process;cellular metabolic process;cellular nitrogen compound metabolic process;cellular process;macromolecule metabolic process;macromolecule modification;metabolic process;ncRNA metabolic process;ncRNA processing;nitrogen compound metabolic process;nucleic acid metabolic process;nucleobase-containing compound metabolic process;primary metabolic process;RNA metab…	binding;nucleic acid binding;RNA binding;snoRNA binding	box C/D snoRNP complex;cell part;cytoplasm;intracellular non-membrane-bounded organelle;intracellular organelle;intracellular organelle part;intracellular part;macromolecular complex;membrane;non-membrane-bounded organelle;nuclear part;nucleolar part;nucleolus;nucleoplasm;organelle;organelle part;preribosome;pre-snoRNP complex;ribonucleoprotein complex;small nucleolar ribonucleoprotein complex;sm…	Ribosome biogenesis in eukaryotes	Nop;NOP5NT;NOSIC	31	31	31	58.4	58.4	58.4	66.049	323.31	20801000000	11219000000	9582100000	2.20275	1.06924	1.835	0.208495	0	NaN	2.85776	-0.539697	O00567;Q5JXT2;H0YDU4;H0Y653	O00567;Q5JXT2	Nucleolar protein 56	NOP56
2.06264	2.30845	2.23192	2.78854	5.25942	4.60999	NaN	NaN	NaN	NaN	NaN	NaN	+				biological regulation;cellular metabolic process;cellular process;cellular response to stimulus;lipid metabolic process;metabolic process;oxidation-reduction process;primary metabolic process;regulation of biological process;regulation of cellular process;response to stimulus;signal transduction;small molecule metabolic process;xenobiotic metabolic process	antioxidant activity;catalytic activity;glutathione peroxidase activity;glutathione transferase activity;oxidoreductase activity;oxidoreductase activity, acting on peroxide as acceptor;peroxidase activity;transferase activity;transferase activity, transferring alkyl or aryl (other than methyl) groups	cell part;cytoplasmic part;endoplasmic reticulum membrane;endoplasmic reticulum part;envelope;extracellular membrane-bounded organelle;extracellular organelle;extracellular region part;extracellular vesicular exosome;integral to membrane;intracellular membrane-bounded organelle;intracellular organelle;intracellular organelle part;intracellular part;intrinsic to membrane;membrane;membrane part;mem…	Drug metabolism - cytochrome P450;Glutathione metabolism;Metabolism of xenobiotics by cytochrome P450	MAPEG	5	5	5	31.3	31.3	31.3	18.416	62.529	2245400000	120350000	2125100000	2.92348	2.101	1.51212	4.11932	0	NaN	0	NaN	Q5VV89;O14880;Q5VV87	Q5VV89;O14880;Q5VV87	Microsomal glutathione S-transferase 3	MGST3
2.38009	2.34494	NaN	2.26942	2.68939	NaN	1.27059	1.20389	1.56301	1.99183	1.70531	NaN	+				biological regulation;cellular component assembly;cellular component assembly at cellular level;cellular component organization;cellular component organization at cellular level;cellular component organization or biogenesis;cellular component organization or biogenesis at cellular level;cellular macromolecular complex assembly;cellular macromolecular complex subunit organization;cellular macromol…	acetyltransferase activity;catalytic activity;H4 histone acetyltransferase activity;histone acetyltransferase activity;lysine N-acetyltransferase activity;N-acetyltransferase activity;N-acyltransferase activity;transferase activity;transferase activity, transferring acyl groups;transferase activity, transferring acyl groups other than amino-acyl groups	cell part;chromatin;chromosomal part;cytoplasm;intracellular membrane-bounded organelle;intracellular organelle;intracellular organelle part;intracellular part;macromolecular complex;membrane-bounded organelle;nuclear chromatin;nuclear chromosome part;nuclear matrix;nuclear part;nucleoplasm;nucleus;organelle;organelle part;protein complex		Hat1_N	5	5	5	18.6	18.6	18.6	49.512	61.873	1473100000	434650000	1038500000	2.30582	2.26252	1.25153	2.37941	2.11096	1.24583	1.28366	1.74857	O14929;O14929-2	O14929;O14929-2	Histone acetyltransferase type B catalytic subunit	HAT1
5.47764	3.54226	6.27346	NaN	4.04981	5.61026	1.99592	4.18547	3.6663	NaN	NaN	NaN					biological regulation;cellular component organization;cellular component organization at cellular level;cellular component organization or biogenesis;cellular component organization or biogenesis at cellular level;cellular process;Golgi organization;organelle organization;positive regulation of biological process;positive regulation of cellular component organization;positive regulation of cellul…		cell part;cytoplasmic part;endoplasmic reticulum membrane;endoplasmic reticulum part;endoplasmic reticulum-Golgi intermediate compartment;endoplasmic reticulum-Golgi intermediate compartment membrane;Golgi apparatus part;Golgi membrane;integral to membrane;intracellular membrane-bounded organelle;intracellular organelle;intracellular organelle part;intracellular part;intrinsic to membrane;membran…		SURF4	7	7	7	44.1	44.1	44.1	21.127	110.65	2778500000	122530000	2656000000	1.59628	4.99779	0.982657	4.73003	1.39276	3.18256	0	NaN	Q5T8U5;O15260;O15260-2;B7Z1G8;O15260-3	Q5T8U5;O15260;O15260-2;B7Z1G8;O15260-3	Surfeit locus protein 4	SURF4
1.41446	1.14209	0.960956	0.26135	0.256769	0.350837	-0.387242	NaN	-0.539394	-0.179694	-0.283773	-0.173921					anatomical structure homeostasis;biological regulation;biosynthetic process;box H/ACA snoRNA 3'-end processing;box H/ACA snoRNA metabolic process;box H/ACA snoRNA processing;cell proliferation;cellular biosynthetic process;cellular component organization;cellular component organization at cellular level;cellular component organization or biogenesis;cellular component organization or biogenesis at…	binding;catalytic activity;DNA polymerase activity;intramolecular transferase activity;isomerase activity;nucleic acid binding;nucleotidyltransferase activity;pseudouridine synthase activity;RNA binding;RNA-directed DNA polymerase activity;telomerase activity;transferase activity;transferase activity, transferring phosphorus-containing groups	box H/ACA RNP complex;box H/ACA snoRNP complex;Cajal body;cell part;cytoplasm;intracellular membrane-bounded organelle;intracellular non-membrane-bounded organelle;intracellular organelle;intracellular organelle part;intracellular part;macromolecular complex;membrane-bounded organelle;non-membrane-bounded organelle;nuclear body;nuclear part;nucleolar part;nucleolus;nucleoplasm;nucleoplasm part;nu…	Ribosome biogenesis in eukaryotes	DKCLD;PUA;TruB_N	19	19	19	45.3	45.3	45.3	57.673	98.115	4475500000	2464300000	2011200000	1.8307	1.0725	1.60047	0.189652	1.06825	-0.563318	1.89281	-0.312463	O60832;O60832-2;C9IYT0;H7C0M1;H7C2Q9;H7C2Q2;H7BZF2	O60832;O60832-2;C9IYT0	H/ACA ribonucleoprotein complex subunit 4	DKC1
4.70321	4.56377	2.2722	8.15289	8.24127	8.16616	NaN	NaN	NaN	3.75467	1.69006	3.52569		+			biological regulation;cellular process;establishment of localization;establishment of localization in cell;establishment of protein localization;intracellular protein transmembrane transport;intracellular protein transport;intracellular transport;protein transmembrane transport;protein transport;regulation of biological process;regulation of glucose import;regulation of glucose transport;regulati…		cell part;cytoplasmic part;endoplasmic reticulum;endoplasmic reticulum part;integral to endoplasmic reticulum membrane;integral to membrane;integral to organelle membrane;intracellular membrane-bounded organelle;intracellular organelle;intracellular organelle part;intracellular part;intrinsic to endoplasmic reticulum membrane;intrinsic to membrane;intrinsic to organelle membrane;membrane part;mem…		Reticulon	53	53	53	79.3	79.3	79.3	59.263	323.31	2631000000000	16902000000	2614100000000	1.38176	3.74639	4.93643	8.08677	0	NaN	1.32332	2.89014	O75298;Q7RTN0;O75298-2;Q96CG9;K7EMR7;O75298-3	O75298;Q7RTN0;O75298-2;Q96CG9	Reticulon-2;Reticulon	RTN2
1.94972	3.11083	1.64552	2.16543	3.0367	3.74599	3.07416	2.76634	2.43994	0.456386	NaN	NaN			+		biological regulation;cellular process;ER to Golgi vesicle-mediated transport;establishment of localization;establishment of localization in cell;establishment of protein localization;Golgi vesicle transport;intracellular transport;positive regulation of biological process;positive regulation of catabolic process;positive regulation of macromolecule metabolic process;positive regulation of metabo…		cell part;cytoplasmic membrane-bounded vesicle;cytoplasmic part;cytoplasmic vesicle;endoplasmic reticulum membrane;endoplasmic reticulum part;endoplasmic reticulum-Golgi intermediate compartment;endoplasmic reticulum-Golgi intermediate compartment membrane;Golgi apparatus part;Golgi membrane;integral to membrane;intracellular membrane-bounded organelle;intracellular organelle;intracellular organe…	Phagosome;SNARE interactions in vesicular transport	Longin;Synaptobrevin	8	8	8	47	47	47	24.593	53.603	1460800000	308200000	1152600000	1.38677	2.13536	1.61565	2.88271	2.32746	2.66015	0	0.356386	O75396;A0A087X1A9	O75396	Vesicle-trafficking protein SEC22b	SEC22B
1.27828	1.21095	1.26454	2.20283	1.63548	1.72766	1.05499	1.03154	1.18129	0.551295	0.504366	0.135666	+		+		cellular component assembly;cellular component assembly at cellular level;cellular component organization;cellular component organization at cellular level;cellular component organization or biogenesis;cellular component organization or biogenesis at cellular level;cellular macromolecular complex assembly;cellular macromolecular complex subunit organization;cellular process;macromolecular complex…	binding;GTP binding;guanyl nucleotide binding;guanyl ribonucleotide binding;nucleic acid binding;nucleotide binding;purine nucleotide binding;purine ribonucleoside triphosphate binding;purine ribonucleotide binding;ribonucleoprotein binding;ribonucleotide binding;ribosomal small subunit binding;RNA binding;rRNA binding	actin cytoskeleton;cell part;cytoplasm;cytoplasmic part;cytoskeleton;intermediate filament cytoskeleton;intracellular membrane-bounded organelle;intracellular non-membrane-bounded organelle;intracellular organelle;intracellular organelle lumen;intracellular organelle part;intracellular part;membrane;membrane-bounded organelle;membrane-enclosed lumen;mitochondrial inner membrane;mitochondrial matr…		MMR_HSR1	9	9	9	27.9	27.9	27.9	48.349	63.443	1724800000	649300000	1075500000	3.49735	1.15126	2.00525	1.75532	2.65705	0.989272	0.817548	0.297109	O75616;J3QSB2;J3QRV9;O75616-2;K7EQJ8;J3QT61	O75616;J3QSB2;J3QRV9;O75616-2	GTPase Era, mitochondrial	ERAL1
1.32429	1.28919	1.35089	0.582363	0.771801	0.642748	-0.00917584	0.199625	0.298306	1.08148	0.332737	0.223423	+				cell differentiation;cellular component assembly;cellular component assembly at cellular level;cellular component organization;cellular component organization at cellular level;cellular component organization or biogenesis;cellular component organization or biogenesis at cellular level;cellular developmental process;cellular macromolecular complex assembly;cellular macromolecular complex subunit …	adenyl nucleotide binding;adenyl ribonucleotide binding;ATP binding;ATPase activity;ATPase activity, coupled;ATP-dependent helicase activity;ATP-dependent RNA helicase activity;binding;catalytic activity;helicase activity;hydrolase activity;hydrolase activity, acting on acid anhydrides;hydrolase activity, acting on acid anhydrides, in phosphorus-containing anhydrides;identical protein binding;nuc…	catalytic step 2 spliceosome;cell part;intracellular membrane-bounded organelle;intracellular organelle;intracellular organelle part;intracellular part;macromolecular complex;membrane;membrane-bounded organelle;nuclear part;nucleoplasm;nucleus;organelle;organelle part;ribonucleoprotein complex;small nuclear ribonucleoprotein complex;spliceosomal complex;U5 snRNP	Spliceosome	DEAD;Helicase_C;Sec63	73	73	73	39.7	39.7	39.7	244.5	323.31	13428000000	6482000000	6945700000	3.66965	1.22146	2.01701	0.565637	0.252298	0.0629186	0.619718	0.445878	O75643;O75643-2;B4E0P5	O75643	U5 small nuclear ribonucleoprotein 200 kDa helicase	SNRNP200
1.61753	1.69341	NaN	2.81432	3.05311	3.18845	2.19969	2.00515	1.3097	NaN	NaN	NaN		+			biological regulation;biosynthetic process;carbohydrate metabolic process;carbohydrate transport;cell cycle;cell cycle process;cell surface receptor linked signaling pathway;cellular biosynthetic process;cellular component disassembly;cellular component disassembly at cellular level;cellular component organization;cellular component organization at cellular level;cellular component organization o…	structural constituent of nuclear pore;structural molecule activity;transporter activity	cell part;envelope;intracellular organelle part;intracellular part;macromolecular complex;membrane;membrane part;nuclear envelope;nuclear membrane;nuclear part;nuclear pore;organelle envelope;organelle membrane;organelle part;pore complex;protein complex	RNA transport	Nucleoporin_C;Nucleoporin_N	19	19	19	20.2	20.2	20.2	155.2	153.44	839100000	156050000	683040000	1.809	1.55547	2.85349	2.91863	1.6324	1.73818	0	NaN	O75694;E9PF10;O75694-2;D6RA13	O75694;E9PF10;O75694-2	Nuclear pore complex protein Nup155	NUP155
3.43563	2.90124	4.12043	NaN	NaN	4.51197	4.90881	3.4939	4.75596	2.33919	3.90747	2.34525					ATP biosynthetic process;ATP metabolic process;ATP synthesis coupled proton transport;biosynthetic process;cation transport;cellular biosynthetic process;cellular metabolic process;cellular nitrogen compound biosynthetic process;cellular nitrogen compound metabolic process;cellular process;electron transport chain;energy coupled proton transport, down electrochemical gradient;establishment of loc…	cation transmembrane transporter activity;hydrogen ion transmembrane transporter activity;inorganic cation transmembrane transporter activity;ion transmembrane transporter activity;monovalent inorganic cation transmembrane transporter activity;substrate-specific transmembrane transporter activity;substrate-specific transporter activity;transmembrane transporter activity;transporter activity	cell part;cytoplasm;cytoplasmic part;extracellular membrane-bounded organelle;extracellular organelle;extracellular region part;extracellular vesicular exosome;intracellular membrane-bounded organelle;intracellular organelle;intracellular organelle part;intracellular part;macromolecular complex;membrane;membrane part;membrane-bounded organelle;membrane-bounded vesicle;mitochondrial inner membrane…	Alzheimer's disease;Huntington's disease;Oxidative phosphorylation;Parkinson's disease	Mt_ATP-synt_D	14	14	14	82.6	82.6	82.6	18.491	84.745	7967300000	630650000	7336700000	1.97116	3.38577	0	4.41197	1.968	4.28622	1.47063	2.76397	O75947;O75947-2;F5H608	O75947;O75947-2	ATP synthase subunit d, mitochondrial	ATP5H
1.88018	1.84631	NaN	NaN	2.19783	2.51549	1.9293	2.00874	1.70969	2.58359	2.84254	2.40193			+		activation of signaling protein activity involved in unfolded protein response;biological regulation;biosynthetic process;calcium ion homeostasis;cation homeostasis;cellular biosynthetic process;cellular calcium ion homeostasis;cellular cation homeostasis;cellular chemical homeostasis;cellular component organization;cellular component organization at cellular level;cellular component organization…	beta-tubulin binding;binding;cytoskeletal protein binding;enzyme binding;FFAT motif binding;identical protein binding;microtubule binding;protein binding;protein dimerization activity;protein domain specific binding;protein heterodimerization activity;protein homodimerization activity;tubulin binding	cell part;cytoplasmic part;endoplasmic reticulum;endoplasmic reticulum membrane;endoplasmic reticulum part;Golgi apparatus;Golgi apparatus part;Golgi membrane;integral to membrane;intracellular membrane-bounded organelle;intracellular organelle;intracellular organelle part;intracellular part;intrinsic to membrane;membrane;membrane part;membrane-bounded organelle;organelle;organelle membrane;organ…		Motile_Sperm	11	10	10	54.3	54.3	54.3	27.228	35.088	3122200000	771140000	2351000000	2.21374	1.76324	1.34938	2.25666	2.60073	1.78257	2.58746	2.50935	O95292;E5RK64;O95292-2	O95292	Vesicle-associated membrane protein-associated protein B/C	VAPB
0.939678	1.4177	1.38123	0.320658	0.265557	0.342782	-0.169858	-0.217927	-0.144345	0.187768	0.291957	0.217231					antigen processing and presentation;antigen processing and presentation of exogenous antigen;antigen processing and presentation of exogenous peptide antigen;antigen processing and presentation of exogenous peptide antigen via MHC class II;antigen processing and presentation of peptide antigen;antigen processing and presentation of peptide antigen via MHC class II;antigen processing and presentat…	binding;enzyme binding;kinase binding;protein binding;protein kinase binding;protein transporter activity;substrate-specific transporter activity;transporter activity	AP-2 adaptor complex;apical plasma membrane;AP-type membrane coat adaptor complex;basolateral plasma membrane;cell part;clathrin adaptor complex;clathrin coat;clathrin coat of trans-Golgi network vesicle;clathrin coated vesicle membrane;clathrin vesicle coat;clathrin-coated endocytic vesicle membrane;coated vesicle membrane;cytoplasmic part;cytoplasmic vesicle membrane;cytoplasmic vesicle part;cy…	Endocrine and other factor-regulated calcium reabsorption;Endocytosis;Huntington's disease	Adaptin_N;Alpha_adaptin_C;Alpha_adaptinC2	32	32	22	40.8	40.8	28.8	105.36	232.11	4713900000	2051800000	2662100000	1.75712	1.1462	1.92882	0.209666	2.2223	-0.277377	1.29437	0.132319	O95782-2;O95782	O95782-2;O95782	AP-2 complex subunit alpha-1	AP2A1
1.87837	1.89115	1.80166	NaN	2.25906	1.11863	2.31481	2.70786	2.60559	NaN	NaN	NaN	+		+		anatomical structure development;biosynthetic process;cell proliferation;cellular aromatic compound metabolic process;cellular biosynthetic process;cellular component assembly;cellular component organization;cellular component organization or biogenesis;cellular macromolecule biosynthetic process;cellular macromolecule metabolic process;cellular metabolic compound salvage;cellular metabolic proce…	adenyl nucleotide binding;adenyl ribonucleotide binding;ATP binding;binding;catalytic activity;cation binding;deoxynucleoside kinase activity;identical protein binding;ion binding;kinase activity;metal ion binding;nucleobase-containing compound kinase activity;nucleoside kinase activity;nucleotide binding;protein binding;purine nucleotide binding;purine ribonucleoside triphosphate binding;purine …	cell part;cytoplasmic part;cytosol;intracellular part	Drug metabolism - other enzymes;Pyrimidine metabolism	TK	12	12	12	67.1	67.1	67.1	25.468	57.899	1647900000	452000000	1195900000	3.5971	1.75706	0.658841	1.58884	2.63548	2.44275	0	NaN	P04183;K7ERV3;K7ES52;K7ERJ1;K7ENW5	P04183;K7ERV3;K7ES52;K7ERJ1	Thymidine kinase, cytosolic;Thymidine kinase	TK1
1.60198	1.51954	1.6778	3.23427	3.13379	2.99773	1.22045	1.27047	1.309	1.26957	1.52837	1.41851	+	+	+		alcohol biosynthetic process;alcohol metabolic process;apoptosis;biological regulation;biosynthetic process;carbohydrate biosynthetic process;carbohydrate metabolic process;cell death;cellular biosynthetic process;cellular carbohydrate biosynthetic process;cellular carbohydrate metabolic process;cellular component organization;cellular component organization at cellular level;cellular component o…	binding;catalytic activity;coenzyme binding;cofactor binding;cytoskeletal protein binding;glyceraldehyde-3-phosphate dehydrogenase (NAD+) (phosphorylating) activity;identical protein binding;microtubule binding;NAD binding;NADP binding;nucleotide binding;oxidoreductase activity;oxidoreductase activity, acting on the aldehyde or oxo group of donors;oxidoreductase activity, acting on the aldehyde o…	cell part;cytoplasm;cytoplasmic part;cytoskeleton;cytosol;extracellular membrane-bounded organelle;extracellular organelle;extracellular region part;extracellular vesicular exosome;intracellular membrane-bounded organelle;intracellular non-membrane-bounded organelle;intracellular organelle;intracellular organelle part;intracellular part;lipid particle;macromolecular complex;membrane;membrane-boun…	Alzheimer's disease;Glycolysis / Gluconeogenesis	Gp_dh_C;Gp_dh_N	18	18	18	67.5	67.5	67.5	36.053	323.31	41231000000	10305000000	30926000000	3.03285	1.49977	3.28899	3.02193	3.31659	1.16664	2.48365	1.30549	P04406;P04406-2;E7EUT5;O14556	P04406;P04406-2;E7EUT5	Glyceraldehyde-3-phosphate dehydrogenase	GAPDH
2.31351	2.37075	2.21835	4.39732	4.52394	4.10568	2.92964	2.80791	3.16673	1.28024	1.45439	1.14724	+	+	+		biosynthetic process;carbohydrate metabolic process;cellular biosynthetic process;cellular carbohydrate metabolic process;cellular macromolecule biosynthetic process;cellular macromolecule metabolic process;cellular metabolic process;cellular process;cellular protein metabolic process;cotranslational protein targeting to membrane;establishment of localization;establishment of localization in cell…	catalytic activity;dolichyl-diphosphooligosaccharide-protein glycotransferase activity;oligosaccharyl transferase activity;transferase activity;transferase activity, transferring glycosyl groups;transferase activity, transferring hexosyl groups	cell part;cytoplasmic membrane-bounded vesicle;cytoplasmic part;cytoplasmic vesicle;endoplasmic reticulum;endoplasmic reticulum membrane;endoplasmic reticulum part;integral to membrane;intracellular membrane-bounded organelle;intracellular organelle;intracellular organelle part;intracellular part;intrinsic to membrane;macromolecular complex;melanosome;membrane;membrane part;membrane-bounded organ…	N-Glycan biosynthesis;Protein processing in endoplasmic reticulum;Various types of N-glycan biosynthesis	Ribophorin_I	31	31	31	63.6	63.6	63.6	68.569	310.91	16000000000	2404500000	13596000000	3.38978	2.20087	3.07008	4.24231	2.87078	2.86809	2.25948	1.19396	P04843;B7Z4L4;F8WF32	P04843;B7Z4L4	Dolichyl-diphosphooligosaccharide--protein glycosyltransferase subunit 1	RPN1
1.81426	1.70226	1.66639	1.81213	1.56696	1.6415	0.130008	0.187514	0.311038	0.699374	0.717561	0.613154	+	+			activation of MAPKK activity;activation of protein kinase activity;adenosine receptor signaling pathway;biological regulation;blood coagulation;cAMP-mediated signaling;cell activation;cell communication;cell cycle;cell division;cell proliferation;cell surface receptor linked signaling pathway;cell-cell signaling;cellular macromolecule metabolic process;cellular metabolic process;cellular process;…	binding;catalytic activity;cation binding;G-protein beta/gamma-subunit complex binding;G-protein-coupled receptor binding;GTP binding;GTPase activity;guanyl nucleotide binding;guanyl ribonucleotide binding;hydrolase activity;hydrolase activity, acting on acid anhydrides;hydrolase activity, acting on acid anhydrides, in phosphorus-containing anhydrides;ion binding;metal ion binding;molecular trans…	cell part;centrosome;cytoplasm;cytoplasmic part;cytoskeletal part;cytosol;extracellular membrane-bounded organelle;extracellular organelle;extracellular region part;extracellular vesicular exosome;extrinsic to internal side of plasma membrane;extrinsic to membrane;extrinsic to plasma membrane;heterotrimeric G-protein complex;intracellular non-membrane-bounded organelle;intracellular organelle;int…	Axon guidance;Chagas disease (American trypanosomiasis);Chemokine signaling pathway;Gap junction;Gastric acid secretion;Leukocyte transendothelial migration;Long-term depression;Melanogenesis;Progesterone-mediated oocyte maturation;Tight junction;Toxoplasmosis	G-alpha	19	19	12	62.3	62.3	40.6	40.45	323.31	25924000000	13152000000	12773000000	3.12624	1.62764	2.6737	1.57353	0.752599	0.10952	2.50816	0.576697	P04899;P04899-6;P04899-3;P04899-5;P04899-2;P04899-4;P11488;P19087;A8MTJ3;A2A2R6;Q5JWD1;H0Y7E8;A0A087WZE5;P38405-3;P38405;P38405-2	P04899;P04899-6;P04899-3;P04899-5;P04899-2;P04899-4	Guanine nucleotide-binding protein G(i) subunit alpha-2	GNAI2
1.32659	1.39819	1.28428	2.6774	0.532068	0.510658	NaN	NaN	NaN	-0.735115	NaN	-1.06013	+				biological regulation;cellular component disassembly;cellular component disassembly at cellular level;cellular component organization;cellular component organization at cellular level;cellular component organization or biogenesis;cellular component organization or biogenesis at cellular level;cellular macromolecular complex disassembly;cellular macromolecular complex subunit organization;cellular…	binding;DNA binding;nucleic acid binding	cell part;chromosomal part;extracellular membrane-bounded organelle;extracellular organelle;extracellular region part;extracellular vesicular exosome;intracellular membrane-bounded organelle;intracellular organelle;intracellular organelle part;intracellular part;macromolecular complex;membrane-bounded organelle;membrane-bounded vesicle;nuclear chromosome part;nuclear nucleosome;nuclear part;nucle…	Systemic lupus erythematosus	Histone	8	1	1	58.5	8.5	8.5	14.105	36.513	3250000000	1185200000	2064800000	3.14136	1.23635	0.59589	1.14004	0	NaN	0.988015	-0.997621	Q93077;Q7L7L0;P04908	Q93077;Q7L7L0;P04908	Histone H2A type 1-C;Histone H2A type 3;Histone H2A type 1-B/E	HIST1H2AC;HIST3H2A;HIST1H2AB
1.32981	1.33685	1.39539	4.71688	4.76813	4.78262	1.72085	1.82481	1.89588	1.00648	1.0964	1.15348	+	+	+		adenine transport;biological regulation;cellular metabolic process;cellular process;chromosome segregation;energy derivation by oxidation of organic compounds;energy reserve metabolic process;establishment of localization;generation of precursor metabolites and energy;metabolic process;nitrogen compound transport;nucleobase transport;nucleobase-containing compound transport;oxidation-reduction pr…	adenine transmembrane transporter activity;binding;enzyme binding;nucleobase transmembrane transporter activity;nucleobase-containing compound transmembrane transporter activity;protein binding;purine base transmembrane transporter activity;substrate-specific transmembrane transporter activity;substrate-specific transporter activity;transmembrane transporter activity;transporter activity;ubiquiti…	cell part;cytoplasmic part;cytoskeletal part;extracellular membrane-bounded organelle;extracellular organelle;extracellular region part;extracellular vesicular exosome;integral to membrane;integral to plasma membrane;intracellular membrane-bounded organelle;intracellular non-membrane-bounded organelle;intracellular organelle;intracellular organelle part;intracellular part;intrinsic to membrane;in…	Calcium signaling pathway;Huntington's disease;Parkinson's disease	Mito_carr	24	10	9	56	28.2	22.5	32.852	117.41	51272000000	8349100000	42923000000	3.56126	1.25402	4.73651	4.65588	3.05636	1.71385	2.72586	0.985452	P05141	P05141	ADP/ATP translocase 2;ADP/ATP translocase 2, N-terminally processed	SLC25A5
4.98313	5.07271	5.25384	5.37886	5.54896	5.08627	5.6495	5.68024	5.60033	5.35385	4.93026	4.99941	+	+	+	+	anatomical structure formation involved in morphogenesis;angiogenesis;ATP biosynthetic process;ATP hydrolysis coupled proton transport;ATP metabolic process;ATP synthesis coupled proton transport;biological regulation;biosynthetic process;cation homeostasis;cation transport;cell differentiation;cellular biosynthetic process;cellular cation homeostasis;cellular chemical homeostasis;cellular compon…	active transmembrane transporter activity;adenyl nucleotide binding;adenyl ribonucleotide binding;ATP binding;ATPase activity;ATPase activity, coupled;ATPase activity, coupled to movement of substances;ATPase activity, coupled to transmembrane movement of ions;ATPase activity, coupled to transmembrane movement of substances;binding;catalytic activity;cation transmembrane transporter activity;cati…	cell part;cell surface;cytoplasmic part;extracellular membrane-bounded organelle;extracellular organelle;extracellular region part;extracellular vesicular exosome;intracellular membrane-bounded organelle;intracellular non-membrane-bounded organelle;intracellular organelle;intracellular organelle lumen;intracellular organelle part;intracellular part;macromolecular complex;membrane;membrane part;me…	Alzheimer's disease;Huntington's disease;Oxidative phosphorylation;Parkinson's disease	ATP-synt_ab;ATP-synt_ab_C;ATP-synt_ab_N	27	27	18	73.5	73.5	49.7	56.559	323.31	144270000000	6060600000	138210000000	3.59659	5.00322	3.17735	5.23803	4.75389	5.54336	3.16158	4.99451	P06576;H0YH81;F8W079;H0YI37	P06576;H0YH81;F8W079	ATP synthase subunit beta, mitochondrial;ATP synthase subunit beta	ATP5B
1.59608	1.33708	0.949199	0.377513	0.400429	0.332622	NaN	NaN	-1.72872	-0.88742	-0.54038	-1.04579		+			antibacterial humoral response;antimicrobial humoral response;cellular component assembly;cellular component assembly at cellular level;cellular component organization;cellular component organization at cellular level;cellular component organization or biogenesis;cellular component organization or biogenesis at cellular level;cellular macromolecular complex assembly;cellular macromolecular comple…	binding;DNA binding;nucleic acid binding	cell part;chromosomal part;extracellular membrane-bounded organelle;extracellular organelle;extracellular region part;extracellular space;extracellular vesicular exosome;intracellular membrane-bounded organelle;intracellular organelle;intracellular organelle part;intracellular part;macromolecular complex;membrane-bounded organelle;membrane-bounded vesicle;nuclear chromosome part;nuclear nucleosom…	Systemic lupus erythematosus	Histone	15	4	0	79.4	11.9	0	13.92	8.4615	25389000000	13236000000	12152000000	1.62171	1.19412	2.26854	0.270188	0	-1.82872	1.6006	-0.924529	Q16778;P06899;P23527;Q96A08;Q6DRA6;Q6DN03	Q16778;P06899;P23527	Histone H2B type 2-E;Histone H2B type 1-J;Histone H2B type 1-O	HIST2H2BE;HIST1H2BJ;HIST1H2BO
1.30287	1.21095	1.42675	1.34863	1.35654	1.71778	1.26466	1.22971	1.15801	0.972987	1.05769	0.983313	+		+		anatomical structure formation involved in morphogenesis;angiogenesis;biological regulation;body fluid secretion;cellular component assembly;cellular component assembly at cellular level;cellular component organization;cellular component organization at cellular level;cellular component organization or biogenesis;cellular component organization or biogenesis at cellular level;cellular membrane or…	binding;calcium ion binding;calcium-dependent phospholipid binding;calcium-dependent protein binding;cation binding;enzyme inhibitor activity;enzyme regulator activity;ion binding;lipase inhibitor activity;lipid binding;metal ion binding;phosphatidylinositol binding;phosphatidylinositol-4,5-bisphosphate binding;phospholipase A2 inhibitor activity;phospholipase inhibitor activity;phospholipid bind…	basement membrane;basolateral plasma membrane;cell cortex;cell part;cell projection;cell surface;cytoplasmic membrane-bounded vesicle;cytoplasmic part;cytoplasmic vesicle;early endosome;endosomal part;endosome;endosome membrane;extracellular matrix part;extracellular membrane-bounded organelle;extracellular organelle;extracellular region part;extracellular space;extracellular vesicular exosome;ex…		Annexin	32	32	32	72	72	72	38.604	323.31	159020000000	63988000000	95030000000	2.57775	1.21352	2.11028	1.37432	3.10343	1.11746	3.06112	0.904664	P07355;P07355-2;H0YN42;H0YMD0;H0YMU9;A6NMY6;H0YM50;H0YKS4;H0YNP5;H0YN28;H0YL33;H0YMM1;H0YKZ7;H0YLV6;H0YMT9;H0YKX9;H0YKL9;H0YMW4;H0YNA0;H0YN52;H0YKV8;H0YMD9;H0YNB8;H0YKN4;H0YLE2	P07355;P07355-2;H0YN42;H0YMD0;H0YMU9;A6NMY6;H0YM50;H0YKS4;H0YNP5;H0YN28;H0YL33	Annexin A2;Annexin;Putative annexin A2-like protein	ANXA2;ANXA2P2
1.43627	1.59674	1.24993	3.02951	2.79344	2.57614	0.245982	1.22768	0.678793	1.25084	1.09559	0.971884		+			anatomical structure development;axon guidance;biological regulation;cellular macromolecule metabolic process;cellular metabolic process;cellular process;cellular protein metabolic process;cellular response to chemical stimulus;cellular response to cytokine stimulus;cellular response to heat;cellular response to interleukin-4;cellular response to organic substance;cellular response to stimulus;ce…	adenyl nucleotide binding;adenyl ribonucleotide binding;antigen binding;ATP binding;binding;double-stranded RNA binding;enzyme binding;enzyme regulator activity;kinase binding;MHC class II protein complex binding;MHC protein complex binding;nitric-oxide synthase regulator activity;nucleic acid binding;nucleotide binding;protein binding;protein domain specific binding;purine nucleotide binding;pur…	cell part;cytoplasm;cytoplasmic membrane-bounded vesicle;cytoplasmic part;cytoplasmic vesicle;cytosol;extracellular membrane-bounded organelle;extracellular organelle;extracellular region part;extracellular vesicular exosome;intracellular membrane-bounded organelle;intracellular organelle;intracellular organelle part;intracellular part;melanosome;membrane;membrane-bounded organelle;membrane-bound…	Antigen processing and presentation;NOD-like receptor signaling pathway;Pathways in cancer;Plant-pathogen interaction;Progesterone-mediated oocyte maturation;Prostate cancer;Protein processing in endoplasmic reticulum	HATPase_c;HSP90	41	41	24	71.7	71.7	48.1	83.263	323.31	37155000000	15513000000	21642000000	2.24804	1.32765	2.63018	2.69969	0.791103	0.617485	2.19571	1.0061	P08238;Q58FF7	P08238	Heat shock protein HSP 90-beta	HSP90AB1
1.76094	1.95256	1.85328	1.87751	1.61471	2.11573	0.248171	0.462995	0.29537	NaN	0.492417	0.536451	+				biological regulation;blood coagulation;cAMP-mediated signaling;cell activation;cell communication;cell cycle;cell division;cell surface receptor linked signaling pathway;cell-cell signaling;cellular component organization;cellular component organization at cellular level;cellular component organization or biogenesis;cellular component organization or biogenesis at cellular level;cellular membran…	binding;catalytic activity;cation binding;G-protein beta/gamma-subunit complex binding;G-protein-coupled receptor binding;GTP binding;GTPase activity;guanyl nucleotide binding;guanyl ribonucleotide binding;hydrolase activity;hydrolase activity, acting on acid anhydrides;hydrolase activity, acting on acid anhydrides, in phosphorus-containing anhydrides;ion binding;metabotropic serotonin receptor b…	cell part;centrosome;cytoplasm;cytoplasmic membrane-bounded vesicle;cytoplasmic part;cytoplasmic vesicle;cytoskeletal part;extracellular membrane-bounded organelle;extracellular organelle;extracellular region part;extracellular vesicular exosome;extrinsic to internal side of plasma membrane;extrinsic to membrane;extrinsic to plasma membrane;Golgi apparatus;heterotrimeric G-protein complex;intrace…	Axon guidance;Chagas disease (American trypanosomiasis);Chemokine signaling pathway;Gap junction;Gastric acid secretion;Leukocyte transendothelial migration;Long-term depression;Melanogenesis;Progesterone-mediated oocyte maturation;Tight junction;Toxoplasmosis	G-alpha	16	10	10	50	30.8	30.8	40.532	202.15	7472800000	3668200000	3804600000	3.00364	1.75559	2.17906	1.76932	1.16248	0.235512	1.47123	0.414434	P08754	P08754	Guanine nucleotide-binding protein G(k) subunit alpha	GNAI3
1.36132	1.20157	1.34432	NaN	2.59526	2.39983	1.25713	1.10326	0.758559	NaN	NaN	1.11537	+				apoptosis;B cell activation;B cell activation involved in immune response;B cell differentiation;biological regulation;carbohydrate homeostasis;cell activation;cell activation involved in immune response;cell death;cell differentiation;cellular chemical homeostasis;cellular developmental process;cellular glucose homeostasis;cellular homeostasis;cellular process;cellular response to carbohydrate s…	binding;carbohydrate binding;disaccharide binding;galactoside binding;lactose binding;molecular transducer activity;monosaccharide binding;signal transducer activity;sugar binding	cell part;cell surface;cytoplasm;extracellular matrix;extracellular membrane-bounded organelle;extracellular organelle;extracellular region part;extracellular space;extracellular vesicular exosome;intracellular;intracellular membrane-bounded organelle;intracellular organelle;intracellular part;membrane-bounded organelle;membrane-bounded vesicle;nucleus;organelle;proteinaceous extracellular matrix…		Gal-bind_lectin	8	8	8	71.9	71.9	71.9	14.716	70.242	1298200000	394340000	903830000	2.75203	1.2024	1.58615	2.39755	1.62463	0.939651	0	1.01537	P09382;F8WEI7	P09382	Galectin-1	LGALS1
1.371	1.3497	1.44026	0.378623	0.469365	0.37629	NaN	0.162597	-2.15882	-1.20217	-1.18774	-0.651518	+				biological regulation;cellular process;cellular response to chemical stimulus;cellular response to endogenous stimulus;cellular response to estradiol stimulus;cellular response to estrogen stimulus;cellular response to hormone stimulus;cellular response to organic substance;cellular response to steroid hormone stimulus;cellular response to stimulus;positive regulation of biological process;positi…	binding;chromatin binding;chromatin DNA binding;core promoter binding;core promoter proximal region DNA binding;core promoter proximal region sequence-specific DNA binding;core promoter sequence-specific DNA binding;DNA binding;enhancer binding;enhancer sequence-specific DNA binding;nucleic acid binding;nucleosomal DNA binding;nucleosome binding;regulatory region DNA binding;regulatory region nuc…	cell part;chromatin;chromosomal part;euchromatin;extracellular membrane-bounded organelle;extracellular organelle;extracellular region part;extracellular vesicular exosome;heterochromatin;intracellular membrane-bounded organelle;intracellular organelle;intracellular organelle part;intracellular part;macromolecular complex;membrane-bounded organelle;membrane-bounded vesicle;nuclear chromatin;nucle…	Systemic lupus erythematosus	Histone	6	4	4	53.9	46.9	46.9	13.509	32.343	18472000000	9657000000	8815500000	3.34596	1.28699	2.01107	0.308093	0.285974	-1.09811	1.59417	-1.11381	Q71UI9;P0C0S5;C9J0D1;Q71UI9-4;Q71UI9-2;Q71UI9-3;C9J386	Q71UI9;P0C0S5;C9J0D1;Q71UI9-4;Q71UI9-2;Q71UI9-3;C9J386	Histone H2A.V;Histone H2A.Z;Histone H2A	H2AFV;H2AFZ
2.32253	2.16652	2.31104	2.74242	2.93787	2.87387	1.83786	1.95319	1.81824	1.35569	1.09633	1.31771	+	+	+		activation of caspase activity;activation of immune response;activation of innate immune response;adaptive immune response;adaptive immune response based on somatic recombination of immune receptors built from immunoglobulin superfamily domains;B cell activation;B cell activation involved in immune response;B cell cytokine production;B cell mediated immunity;B cell proliferation;biological regula…	adenyl nucleotide binding;adenyl ribonucleotide binding;ATP binding;ATPase activity;binding;catalytic activity;chaperone binding;DNA binding;DNA replication origin binding;double-stranded RNA binding;enzyme binding;hydrolase activity;hydrolase activity, acting on acid anhydrides;hydrolase activity, acting on acid anhydrides, in phosphorus-containing anhydrides;lipopolysaccharide binding;nucleic a…	cell part;cell surface;coated pit;coated vesicle;cytoplasm;cytoplasmic membrane-bounded vesicle;cytoplasmic part;cytoplasmic vesicle;cytosol;early endosome;endosome;extracellular membrane-bounded organelle;extracellular organelle;extracellular region part;extracellular space;extracellular vesicular exosome;intracellular membrane-bounded organelle;intracellular organelle;intracellular organelle lu…	ko05152;RNA degradation;Type I diabetes mellitus	Cpn60_TCP1	34	34	34	67.9	67.9	67.9	61.054	323.31	21349000000	6451000000	14898000000	3.27058	2.1667	3.35956	2.75139	3.2477	1.76976	2.31394	1.15658	P10809;E7EXB4;E7ESH4;P10809-2;C9JL25;C9JL19;C9JCQ4;C9J0S9	P10809	60 kDa heat shock protein, mitochondrial	HSPD1
2.27691	2.43456	2.5007	3.22974	3.28848	3.18326	4.04028	4.04998	3.88801	3.11612	3.01099	2.91294	+	+	+	+	activation of signaling protein activity involved in unfolded protein response;anatomical structure arrangement;anatomical structure development;biological regulation;blood coagulation;catabolic process;cell activation;cell communication;cellular catabolic process;cellular macromolecule catabolic process;cellular macromolecule metabolic process;cellular metabolic process;cellular process;cellular…	adenyl nucleotide binding;adenyl ribonucleotide binding;ATP binding;ATPase activity;binding;calcium ion binding;catalytic activity;cation binding;chaperone binding;enzyme binding;glycoprotein binding;hydrolase activity;hydrolase activity, acting on acid anhydrides;hydrolase activity, acting on acid anhydrides, in phosphorus-containing anhydrides;ion binding;metal ion binding;misfolded protein bin…	adherens junction;anchoring junction;cell junction;cell part;cell surface;cell-substrate adherens junction;cell-substrate junction;cytoplasmic membrane-bounded vesicle;cytoplasmic part;cytoplasmic vesicle;endoplasmic reticulum;endoplasmic reticulum chaperone complex;endoplasmic reticulum lumen;endoplasmic reticulum membrane;endoplasmic reticulum part;endoplasmic reticulum-Golgi intermediate compa…	Prion diseases;Protein export;Protein processing in endoplasmic reticulum	HSP70	48	46	46	60.9	59.8	59.8	72.332	323.31	271720000000	31790000000	239930000000	3.08148	2.30406	4.0253	3.13383	3.74119	3.89276	3.3923	2.91335	P11021	P11021	78 kDa glucose-regulated protein	HSPA5
2.21135	2.36323	2.34082	5.45506	5.23013	5.26529	2.87823	2.90431	2.87011	2.70277	2.66221	2.51586	+	+	+	+	axon guidance;biological regulation;biosynthetic process;cell communication;cell-cell signaling;cellular biosynthetic process;cellular component disassembly;cellular component disassembly at cellular level;cellular component organization;cellular component organization at cellular level;cellular component organization or biogenesis;cellular component organization or biogenesis at cellular level;c…	adenyl nucleotide binding;adenyl ribonucleotide binding;antigen binding;ATP binding;ATPase activity;ATPase activity, coupled;binding;C3HC4-type RING finger domain binding;catalytic activity;enzyme binding;G-protein-coupled receptor binding;heat shock protein binding;hydrolase activity;hydrolase activity, acting on acid anhydrides;hydrolase activity, acting on acid anhydrides, in phosphorus-contai…	adherens junction;anchoring junction;blood microparticle;cell junction;cell part;cell-substrate adherens junction;cell-substrate junction;clathrin coated vesicle membrane;clathrin sculpted gamma-aminobutyric acid transport vesicle membrane;coated vesicle membrane;cytoplasmic membrane-bounded vesicle;cytoplasmic part;cytoplasmic vesicle;cytoplasmic vesicle membrane;cytoplasmic vesicle part;cytosol…	Antigen processing and presentation;Endocytosis;MAPK signaling pathway;Measles;Protein processing in endoplasmic reticulum;Spliceosome;Toxoplasmosis	HSP70	52	51	36	78	76.9	60.5	70.897	323.31	848340000000	88197000000	760140000000	3.33683	2.20513	3.74647	5.21683	4.86234	2.78422	3.29741	2.52695	P11142;E9PKE3;E9PNE6;P11142-2;A8K7Q2;E9PN89;E9PS65;E9PLF4;E9PQQ4;E9PQK7;E9PK54;E9PPY6;E9PM13;E9PN25;E9PI65	P11142;E9PKE3;E9PNE6;P11142-2;A8K7Q2	Heat shock cognate 71 kDa protein	HSPA8
1.2022	1.3667	1.44239	0.244278	0.236707	0.437334	NaN	NaN	-1.10002	-0.00511617	-0.122853	-0.31642	+				apoptotic chromosome condensation;biological regulation;cell cycle;cell cycle process;cell differentiation;cell division;cellular component organization;cellular component organization at cellular level;cellular component organization or biogenesis;cellular component organization or biogenesis at cellular level;cellular developmental process;cellular macromolecule metabolic process;cellular metab…	adenyl nucleotide binding;adenyl ribonucleotide binding;ATP binding;ATPase activity;ATPase activity, coupled;binding;catalytic activity;cation binding;chromatin binding;DNA bending activity;DNA binding;DNA topoisomerase (ATP-hydrolyzing) activity;DNA topoisomerase activity;DNA-dependent ATPase activity;drug binding;enzyme binding;histone deacetylase binding;hydrolase activity;hydrolase activity, …	cell part;chromosome;condensed chromosome;cytoplasm;DNA topoisomerase complex (ATP-hydrolyzing);intracellular membrane-bounded organelle;intracellular non-membrane-bounded organelle;intracellular organelle;intracellular organelle part;intracellular part;macromolecular complex;membrane-bounded organelle;non-membrane-bounded organelle;nuclear part;nucleolus;nucleoplasm;nucleus;organelle;organelle p…		DNA_gyraseB;DNA_topoisoIV;DTHCT;HATPase_c;Toprim	88	88	71	52.4	52.4	44.3	174.38	323.31	62630000000	34396000000	28233000000	2.48566	1.23709	1.05435	0.206106	0	-1.20002	0.951643	-0.24813	P11388;P11388-2;P11388-3;P11388-4;J3KTB7	P11388;P11388-2;P11388-3;P11388-4	DNA topoisomerase 2-alpha	TOP2A
1.21313	1.24105	1.29778	4.80998	4.89893	5.05576	1.91831	1.95702	1.94328	0.890719	1.12572	1.01321	+	+	+		active induction of host immune response by virus;adenine nucleotide transport;ADP transport;apoptosis;ATP transport;biological regulation;cell death;cellular macromolecule metabolic process;cellular metabolic process;cellular process;cellular protein metabolic process;death;energy derivation by oxidation of organic compounds;energy reserve metabolic process;establishment of localization;establis…	active transmembrane transporter activity;antiporter activity;ATP:ADP antiporter activity;secondary active transmembrane transporter activity;solute:solute antiporter activity;transmembrane transporter activity;transporter activity	cell part;cytoplasmic part;integral to membrane;intracellular membrane-bounded organelle;intracellular organelle;intracellular organelle part;intracellular part;intrinsic to membrane;macromolecular complex;membrane;membrane part;membrane-bounded organelle;mitochondrial inner membrane;mitochondrial inner membrane presequence translocase complex;mitochondrial membrane;mitochondrial membrane part;mi…	Calcium signaling pathway;Huntington's disease;Parkinson's disease	Mito_carr	25	25	7	69.8	69.8	18.5	32.866	281.55	199310000000	31547000000	167760000000	3.32967	1.15065	3.65371	4.82156	4.42088	1.83954	2.25837	0.909883	P12236;Q9H0C2	P12236	ADP/ATP translocase 3;ADP/ATP translocase 3, N-terminally processed	SLC25A6
1.73179	1.62265	1.42846	3.48787	3.22138	3.25373	1.7796	2.01289	1.66676	1.12941	1.05589	0.551196	+	+	+		anatomical structure development;biosynthetic process;cell activation;cell proliferation;cellular aromatic compound metabolic process;cellular biosynthetic process;cellular component assembly;cellular component organization;cellular component organization or biogenesis;cellular metabolic process;cellular nitrogen compound biosynthetic process;cellular nitrogen compound metabolic process;cellular …	binding;catalytic activity;cation binding;DNA binding;IMP dehydrogenase activity;ion binding;metal ion binding;nucleic acid binding;nucleotide binding;oxidoreductase activity;oxidoreductase activity, acting on CH-OH group of donors;oxidoreductase activity, acting on the CH-OH group of donors, NAD or NADP as acceptor;RNA binding	cell part;cytoplasm;cytoplasmic part;cytosol;extracellular membrane-bounded organelle;extracellular organelle;extracellular region part;extracellular vesicular exosome;intracellular membrane-bounded organelle;intracellular organelle;intracellular organelle part;intracellular part;membrane;membrane-bounded organelle;membrane-bounded vesicle;microbody;microbody membrane;microbody part;nucleus;organ…	Drug metabolism - other enzymes;Purine metabolism	CBS;IMPDH	19	19	19	53.1	53.1	53.1	55.804	287.63	8560500000	2066600000	6493900000	2.45529	1.4943	3.16829	3.221	2.45672	1.71975	1.33165	0.812167	P12268;H0Y4R1;E7ETK5	P12268;H0Y4R1	Inosine-5-monophosphate dehydrogenase 2	IMPDH2
1.30188	1.18384	NaN	0.318461	0.702126	0.158854	NaN	NaN	NaN	NaN	0.254957	NaN					biological regulation;biosynthetic process;carbohydrate metabolic process;carbohydrate transport;cell cycle;cell cycle checkpoint;cell cycle phase;cell cycle process;cell division;cell surface receptor linked signaling pathway;cellular biosynthetic process;cellular component disassembly;cellular component disassembly at cellular level;cellular component organization;cellular component organizatio…	binding;chromatin binding;cytoskeletal protein binding;dynein complex binding;enzyme binding;heat shock protein binding;identical protein binding;kinase binding;mitogen-activated protein kinase binding;mRNA binding;nucleic acid binding;nucleocytoplasmic transporter activity;protein binding;protein complex binding;protein dimerization activity;protein homodimerization activity;protein kinase bindi…	cell part;chromosomal part;cytoplasm;cytoplasmic dynein complex;cytoplasmic part;cytoskeletal part;dynein complex;envelope;extrinsic to membrane;inclusion body;intracellular membrane-bounded organelle;intracellular non-membrane-bounded organelle;intracellular organelle;intracellular organelle part;intracellular part;kinetochore;macromolecular complex;membrane;membrane part;membrane-bounded organe…	MAPK signaling pathway - yeast;Pathways in cancer;RNA transport;Thyroid cancer	TPR_MLP1_2	14	14	14	7.7	7.7	7.7	267.29	47.711	292130000	139010000	153120000	1.48348	1.14286	0.676478	0.293147	0	NaN	0	0.154957	P12270;P12270-2	P12270	Nucleoprotein TPR	TPR
1.41321	1.49298	1.70226	2.65021	2.56608	2.67439	1.85368	1.95073	1.94845	1.24397	1.1036	0.729705	+	+	+		biological regulation;biosynthetic process;cell differentiation;cellular biosynthetic process;cellular developmental process;cellular macromolecule biosynthetic process;cellular macromolecule metabolic process;cellular metabolic process;cellular process;cellular protein metabolic process;developmental process;gene expression;hemopoietic progenitor cell differentiation;macromolecule biosynthetic p…	binding;catalytic activity;enzyme binding;GTP binding;GTPase activity;guanyl nucleotide binding;guanyl ribonucleotide binding;hydrolase activity;hydrolase activity, acting on acid anhydrides;hydrolase activity, acting on acid anhydrides, in phosphorus-containing anhydrides;kinase binding;nucleic acid binding;nucleoside-triphosphatase activity;nucleotide binding;protein binding;protein kinase bind…	aggresome;cell part;cytoplasm;cytoplasmic part;cytosol;extracellular membrane-bounded organelle;extracellular organelle;extracellular region part;extracellular vesicular exosome;inclusion body;intracellular membrane-bounded organelle;intracellular organelle;intracellular part;macromolecular complex;membrane;membrane-bounded organelle;membrane-bounded vesicle;nucleus;organelle;plasma membrane;poly…		EFG_C;EFG_II;EFG_IV;GTP_EFTU;GTP_EFTU_D2	35	34	34	53.1	52	52	95.337	235.92	7217000000	2030400000	5186600000	2.44586	1.43615	3.77406	2.53023	3.5095	1.81762	1.5784	0.925759	P13639	P13639	Elongation factor 2	EEF2
2.40392	2.58888	2.67694	3.13485	3.15885	3.36163	3.09036	3.3605	3.32754	2.65727	2.58672	2.76842	+	+	+	+	aromatic compound biosynthetic process;biosynthetic process;cellular aromatic compound metabolic process;cellular biosynthetic process;cellular metabolic process;cellular nitrogen compound biosynthetic process;cellular nitrogen compound metabolic process;cellular process;coenzyme biosynthetic process;coenzyme metabolic process;cofactor biosynthetic process;cofactor metabolic process;folic acid-co…	anion binding;binding;catalytic activity;cation binding;cyclohydrolase activity;hydrolase activity;hydrolase activity, acting on carbon-nitrogen (but not peptide) bonds;hydrolase activity, acting on carbon-nitrogen (but not peptide) bonds, in cyclic amidines;ion binding;magnesium ion binding;metal ion binding;methenyltetrahydrofolate cyclohydrolase activity;methylenetetrahydrofolate dehydrogenase…	cell part;cytoplasmic part;extracellular region part;extracellular space;intracellular membrane-bounded organelle;intracellular organelle;intracellular part;membrane-bounded organelle;mitochondrion;organelle	One carbon pool by folate	THF_DHG_CYH;THF_DHG_CYH_C	13	13	13	53.4	53.4	53.4	37.895	159.99	6817600000	1067200000	5750400000	2.97029	2.45658	3.27443	3.11844	3.13997	3.15947	3.37372	2.5708	P13995;P13995-2;B9A062;B8ZZU9	P13995;P13995-2;B9A062;B8ZZU9	Bifunctional methylenetetrahydrofolate dehydrogenase/cyclohydrolase, mitochondrial;NAD-dependent methylenetetrahydrofolate dehydrogenase;Methenyltetrahydrofolate cyclohydrolase	MTHFD2
NaN	2.11656	1.91273	NaN	NaN	1.68912	NaN	3.5493	2.83145	NaN	NaN	NaN					anatomical structure development;biological regulation;biosynthetic process;carbohydrate homeostasis;cellular biosynthetic process;cellular chemical homeostasis;cellular component organization;cellular component organization or biogenesis;cellular glucose homeostasis;cellular homeostasis;cellular macromolecule metabolic process;cellular membrane organization;cellular metabolic process;cellular ni…	adenyl nucleotide binding;adenyl ribonucleotide binding;ATP binding;binding;catalytic activity;cation binding;deoxyribonuclease activity;DNA binding;GTP binding;guanyl nucleotide binding;guanyl ribonucleotide binding;hydrolase activity;hydrolase activity, acting on ester bonds;identical protein binding;ion binding;kinase activity;magnesium ion binding;metal ion binding;nuclease activity;nucleic a…	cell part;cell projection membrane;cell projection part;centrosome;cytoplasm;cytoplasmic part;cytoskeletal part;cytosol;extracellular membrane-bounded organelle;extracellular organelle;extracellular region part;extracellular vesicular exosome;intermediate filament;intracellular membrane-bounded organelle;intracellular non-membrane-bounded organelle;intracellular organelle;intracellular organelle …	Purine metabolism;Pyrimidine metabolism	NDK	11	1	1	70.4	9.2	9.2	17.149	11.447	408300000	95336000	312960000	1.47036	1.91465	0	1.58912	1.13307	3.09038	0	NaN	P15531;P15531-2	P15531;P15531-2	Nucleoside diphosphate kinase A	NME1
2.71429	3.44731	3.488	3.99585	3.58544	3.69789	0.645702	2.66453	NaN	NaN	NaN	NaN		+			anatomical structure development;biological adhesion;biological regulation;blood coagulation;calcium ion homeostasis;calcium ion transmembrane transport;calcium ion transport;calcium-mediated signaling;cation homeostasis;cation transport;cell adhesion;cellular calcium ion homeostasis;cellular cation homeostasis;cellular chemical homeostasis;cellular divalent inorganic cation homeostasis;cellular …	active transmembrane transporter activity;adenyl nucleotide binding;adenyl ribonucleotide binding;ATP binding;ATPase activity;ATPase activity, coupled;ATPase activity, coupled to movement of substances;ATPase activity, coupled to transmembrane movement of ions;ATPase activity, coupled to transmembrane movement of ions, phosphorylative mechanism;ATPase activity, coupled to transmembrane movement o…	cell part;cytoplasmic part;endoplasmic reticulum;endoplasmic reticulum membrane;endoplasmic reticulum part;integral to membrane;integral to plasma membrane;intracellular membrane-bounded organelle;intracellular organelle;intracellular organelle part;intracellular part;intrinsic to membrane;intrinsic to plasma membrane;longitudinal sarcoplasmic reticulum;membrane;membrane part;membrane-bounded org…	Alzheimer's disease;Calcium signaling pathway;Pancreatic secretion	Cation_ATPase_C;Cation_ATPase_N;E1-E2_ATPase;Hydrolase	24	24	19	25.6	25.6	19.7	114.76	101.45	2454100000	334940000	2119200000	2.19084	3.11654	2.95177	3.65972	0.435896	1.55512	0	NaN	P16615;P16615-5;P16615-2;P16615-3;P16615-4;H7C5W9;O14983-3;O14983-2;O14983;A0A0C4DH86;H3BTW4	P16615;P16615-5;P16615-2;P16615-3;P16615-4;H7C5W9	Sarcoplasmic/endoplasmic reticulum calcium ATPase 2	ATP2A2
2.03675	2.0709	1.6515	5.25425	4.9534	4.97664	1.314	1.76532	2.87076	2.08821	2.55949	2.08909		+			cellular macromolecule metabolic process;cellular metabolic process;cellular process;cellular protein metabolic process;cellular response to heat;cellular response to stimulus;cellular response to stress;macromolecule metabolic process;metabolic process;primary metabolic process;protein folding;protein metabolic process;protein refolding;response to abiotic stimulus;response to chemical stimulus;…	adenyl nucleotide binding;adenyl ribonucleotide binding;ATP binding;ATPase activity;ATPase activity, coupled;binding;catalytic activity;enzyme binding;heat shock protein binding;hydrolase activity;hydrolase activity, acting on acid anhydrides;hydrolase activity, acting on acid anhydrides, in phosphorus-containing anhydrides;nucleoside-triphosphatase activity;nucleotide binding;protein binding;pur…	blood microparticle;cell part;centriole;cytoplasm;cytoplasmic part;cytoskeletal part;cytosol;extracellular membrane-bounded organelle;extracellular organelle;extracellular region part;extracellular vesicular exosome;intracellular non-membrane-bounded organelle;intracellular organelle;intracellular organelle part;intracellular part;membrane-bounded organelle;membrane-bounded vesicle;microtubule or…	Antigen processing and presentation;Endocytosis;MAPK signaling pathway;Measles;Protein processing in endoplasmic reticulum;Spliceosome;Toxoplasmosis	HSP70	14	2	2	21.6	5.3	5.3	71.027	14.541	63429000000	6445300000	56984000000	2.26629	1.81972	3.42111	4.96143	1.25703	1.88336	2.27506	2.1456	P17066;P48741	P17066	Heat shock 70 kDa protein 6	HSPA6
1.90408	2.05648	1.71515	3.24822	3.95475	3.51134	2.29593	2.74644	2.52201	1.52381	1.70792	NaN	+	+	+		amine metabolic process;B cell activation;B cell proliferation;biosynthetic process;carboxylic acid metabolic process;cell activation;cell proliferation;cellular amine metabolic process;cellular amino acid metabolic process;cellular biosynthetic process;cellular ketone metabolic process;cellular metabolic process;cellular nitrogen compound biosynthetic process;cellular nitrogen compound metabolic…	adenyl nucleotide binding;adenyl ribonucleotide binding;ATP binding;binding;catalytic activity;CTP synthase activity;ligase activity;ligase activity, forming carbon-nitrogen bonds;nucleotide binding;purine nucleotide binding;purine ribonucleoside triphosphate binding;purine ribonucleotide binding;ribonucleotide binding	cell part;cytoplasmic part;cytosol;intracellular part;membrane	Pyrimidine metabolism	CTP_synth_N;GATase	19	19	19	41.3	41.3	41.3	66.69	134.2	3162900000	509360000	2653500000	2.51977	1.7919	2.45489	3.47144	2.54179	2.42146	1.41327	1.51587	P17812;P17812-2;Q9NRF8	P17812;P17812-2	CTP synthase 1	CTPS1
1.44541	1.3384	1.3421	0.16954	0.143002	0.360196	NaN	NaN	NaN	NaN	0.00100953	-0.289351	+				biological regulation;cellular component organization;cellular component organization at cellular level;cellular component organization or biogenesis;cellular component organization or biogenesis at cellular level;cellular macromolecule metabolic process;cellular metabolic process;cellular nitrogen compound metabolic process;cellular process;cytokinesis;cytoskeleton organization;macromolecule met…	binding;DNA binding;nucleic acid binding;RNA binding	cell part;intracellular organelle part;intracellular part;nuclear body;nuclear part;nuclear speck;nucleoplasm;nucleoplasm part;organelle part		G-patch	21	21	21	14.9	14.9	14.9	247.82	78.018	1993600000	1071000000	922520000	3.12185	1.2753	0.675783	0.124246	0	NaN	0.466608	-0.244171	P18583-10;P18583-3;P18583-4;P18583-7;P18583;P18583-5;P18583-9;P18583-6;P18583-2;P18583-8;H7C1M2;J3QSZ5;H7C2G8	P18583-10;P18583-3;P18583-4;P18583-7;P18583;P18583-5;P18583-9;P18583-6;P18583-2	Protein SON	SON
1.47088	1.19049	1.30282	0.268913	0.39605	0.368936	NaN	NaN	NaN	-1.01185	-0.781578	-0.932802	+				biological regulation;cell cycle phase;cell cycle process;cell division;cellular component assembly;cellular component assembly at cellular level;cellular component organization;cellular component organization at cellular level;cellular component organization or biogenesis;cellular component organization or biogenesis at cellular level;cellular process;chromosome segregation;cytoskeleton organiza…	binding;chromatin binding;chromatin DNA binding;DNA binding;enzyme regulator activity;GTPase regulator activity;guanyl-nucleotide exchange factor activity;histone binding;nucleic acid binding;nucleoside-triphosphatase regulator activity;nucleosomal DNA binding;nucleosome binding;protein binding;Ran guanyl-nucleotide exchange factor activity;Ras guanyl-nucleotide exchange factor activity;small GTP…	cell part;chromatin;chromosomal part;chromosome;condensed chromosome;condensed nuclear chromosome;cytoplasm;intracellular membrane-bounded organelle;intracellular non-membrane-bounded organelle;intracellular organelle;intracellular organelle part;intracellular part;membrane;membrane-bounded organelle;non-membrane-bounded organelle;nuclear chromatin;nuclear chromosome;nuclear chromosome part;nucle…		RCC1	13	13	13	47.3	47.3	47.3	44.969	180.95	3875000000	2165300000	1709700000	2.35458	1.22139	1.61841	0.244633	0	NaN	2.35118	-1.00874	P18754;P18754-2;C9JW69;C9JRH2;C9JMJ4;C9J3R0;C9JQZ4	P18754;P18754-2;C9JW69;C9JRH2;C9JMJ4;C9J3R0;C9JQZ4	Regulator of chromosome condensation	RCC1
2.96652	2.9352	3.15379	2.80612	NaN	NaN	3.52795	3.62796	3.77273	1.88155	3.23452	NaN	+		+		biosynthetic process;cellular aromatic compound metabolic process;cellular biosynthetic process;cellular metabolic process;cellular nitrogen compound biosynthetic process;cellular nitrogen compound metabolic process;cellular process;'de novo' IMP biosynthetic process;heterocycle biosynthetic process;heterocycle metabolic process;IMP biosynthetic process;IMP metabolic process;metabolic process;nit…	acid-amino acid ligase activity;adenyl nucleotide binding;adenyl ribonucleotide binding;ATP binding;binding;carbon-carbon lyase activity;carboxy-lyase activity;catalytic activity;identical protein binding;ligase activity;ligase activity, forming carbon-nitrogen bonds;lyase activity;nucleotide binding;phosphoribosylaminoimidazole carboxylase activity;phosphoribosylaminoimidazolesuccinocarboxamide …	cell part;cytoplasmic part;cytosol;extracellular membrane-bounded organelle;extracellular organelle;extracellular region part;extracellular vesicular exosome;intracellular part;membrane;membrane-bounded organelle;membrane-bounded vesicle;organelle;vesicle	Purine metabolism	AIRC;SAICAR_synt	18	18	18	50.4	50.4	50.4	47.079	148.99	6870100000	755530000	6114600000	3.26253	2.9185	0	2.70612	3.39577	3.54288	0.76707	2.45803	P22234;E9PBS1;P22234-2;D6RF62	P22234;E9PBS1;P22234-2;D6RF62	Multifunctional protein ADE2;Phosphoribosylaminoimidazole-succinocarboxamide synthase;Phosphoribosylaminoimidazole carboxylase	PAICS
2.2258	2.35535	2.0664	NaN	2.34565	1.94497	2.83321	2.98101	2.83774	1.35451	1.62227	1.78014	+		+		biological adhesion;biological regulation;biosynthetic process;cell adhesion;cell surface receptor linked signaling pathway;cellular biosynthetic process;cellular macromolecule biosynthetic process;cellular macromolecule metabolic process;cellular metabolic process;cellular nitrogen compound biosynthetic process;cellular nitrogen compound metabolic process;cellular process;cellular response to st…	adenyl nucleotide binding;adenyl ribonucleotide binding;ATP binding;binding;catalytic activity;cation binding;DNA binding;ion binding;kinase activity;metal ion binding;nucleic acid binding;nucleic acid binding transcription factor activity;nucleobase-containing compound kinase activity;nucleoside diphosphate kinase activity;nucleotide binding;phosphotransferase activity, alcohol group as acceptor…	cell part;cell periphery;cell projection;cytoplasm;cytoplasmic part;cytosol;extracellular membrane-bounded organelle;extracellular organelle;extracellular region part;extracellular vesicular exosome;intracellular membrane-bounded organelle;intracellular organelle;intracellular part;lamellipodium;membrane-bounded organelle;membrane-bounded vesicle;mitochondrion;nucleus;organelle;ruffle;vesicle	Purine metabolism;Pyrimidine metabolism	NDK	15	15	5	65.4	65.4	17.5	32.642	50.064	3501600000	814060000	2687500000	2.80796	2.11585	1.20649	2.04531	3.51753	2.78399	2.15992	1.48564	Q32Q12;P22392-2;J3KPD9;E7ERL0;P22392;E5RHP0;O60361;F6XY72;C9K028	Q32Q12;P22392-2;J3KPD9;E7ERL0;P22392	Nucleoside diphosphate kinase;Nucleoside diphosphate kinase B	NME1-NME2;NME2;NME1
2.34642	2.24486	2.38789	4.26288	4.5277	4.45753	2.3764	2.24175	1.94002	0.788185	1.09997	NaN	+	+	+		aerobic respiration;cellular metabolic process;cellular process;cellular respiration;electron transport chain;energy derivation by oxidation of organic compounds;generation of precursor metabolites and energy;metabolic process;oxidation-reduction process;oxidative phosphorylation;phosphate-containing compound metabolic process;phosphorus metabolic process;phosphorylation;respiratory electron tran…	binding;catalytic activity;cation binding;endopeptidase activity;hydrolase activity;ion binding;metal ion binding;metalloendopeptidase activity;metallopeptidase activity;peptidase activity;peptidase activity, acting on L-amino acid peptides	cell part;cytoplasmic part;extracellular membrane-bounded organelle;extracellular organelle;extracellular region part;extracellular vesicular exosome;intracellular membrane-bounded organelle;intracellular organelle;intracellular organelle part;intracellular part;macromolecular complex;membrane;membrane part;membrane-bounded organelle;membrane-bounded vesicle;mitochondrial inner membrane;mitochond…	Alzheimer's disease;Cardiac muscle contraction;Huntington's disease;Oxidative phosphorylation;Parkinson's disease	Peptidase_M16;Peptidase_M16_C	19	19	19	50.8	50.8	50.8	48.442	201.74	7899000000	1354400000	6544600000	3.43894	2.22639	3.47283	4.31604	2.41986	2.08606	0.934544	0.844076	P22695;H3BRG4;H3BSJ9;H3BP04;H3BUE4;H3BUI9;A0A087WVZ4	P22695;H3BRG4;H3BSJ9;H3BP04	Cytochrome b-c1 complex subunit 2, mitochondrial	UQCRC2
1.39369	1.45323	1.45885	2.7569	2.5509	2.41746	0.268434	0.587461	-2.1042	-2.65444	-2.5154	-1.69045	+	+			anatomical structure development;biological regulation;bone development;cellular component organization;cellular component organization at cellular level;cellular component organization or biogenesis;cellular component organization or biogenesis at cellular level;cellular macromolecule metabolic process;cellular metabolic process;cellular process;cellular protein metabolic process;chaperone-media…	binding;catalytic activity;cis-trans isomerase activity;enzyme binding;isomerase activity;peptide binding;peptidyl-prolyl cis-trans isomerase activity;protein binding;protein complex binding;RNA polymerase binding;unfolded protein binding	adherens junction;anchoring junction;cell junction;cell part;cell-substrate adherens junction;cell-substrate junction;cytoplasmic membrane-bounded vesicle;cytoplasmic part;cytoplasmic vesicle;endoplasmic reticulum;endoplasmic reticulum lumen;endoplasmic reticulum part;extracellular membrane-bounded organelle;extracellular organelle;extracellular region part;extracellular vesicular exosome;focal a…		Pro_isomerase	15	15	15	57.9	57.9	57.9	23.742	117.27	15915000000	5555600000	10360000000	3.61321	1.33526	2.79932	2.47509	0.218162	-0.516102	1.80913	-2.38676	P23284	P23284	Peptidyl-prolyl cis-trans isomerase B	PPIB
4.80436	4.82934	4.31629	2.75061	5.72672	4.05207	5.61241	5.44105	5.27888	4.21785	NaN	NaN	+		+		anatomical structure development;ATP biosynthetic process;ATP metabolic process;ATP synthesis coupled proton transport;biosynthetic process;cation transport;cellular biosynthetic process;cellular metabolic process;cellular nitrogen compound biosynthetic process;cellular nitrogen compound metabolic process;cellular process;developmental process;electron transport chain;energy coupled proton transp…	cation transmembrane transporter activity;hydrogen ion transmembrane transporter activity;inorganic cation transmembrane transporter activity;ion transmembrane transporter activity;monovalent inorganic cation transmembrane transporter activity;substrate-specific transmembrane transporter activity;substrate-specific transporter activity;transmembrane transporter activity;transporter activity	cell part;cytoplasmic part;extracellular membrane-bounded organelle;extracellular organelle;extracellular region part;extracellular vesicular exosome;intracellular membrane-bounded organelle;intracellular organelle;intracellular organelle lumen;intracellular organelle part;intracellular part;macromolecular complex;membrane;membrane part;membrane-bounded organelle;membrane-bounded vesicle;membrane…	Alzheimer's disease;Huntington's disease;Oxidative phosphorylation;Parkinson's disease	Mt_ATP-synt_B	16	16	16	57	57	57	28.908	323.31	19949000000	745750000	19203000000	2.87142	4.55	1.37814	4.07647	3.48875	5.34411	0	4.11785	P24539;Q5QNZ2	P24539;Q5QNZ2	ATP synthase F(0) complex subunit B1, mitochondrial	ATP5F1
4.09828	4.48659	4.43543	4.86468	4.77915	5.03637	5.12784	5.10681	5.07318	3.99485	4.06609	4.07151	+	+	+	+	ATP biosynthetic process;ATP hydrolysis coupled proton transport;ATP metabolic process;ATP synthesis coupled proton transport;biological regulation;biosynthetic process;cation transport;cellular biosynthetic process;cellular metabolic process;cellular nitrogen compound biosynthetic process;cellular nitrogen compound metabolic process;cellular process;developmental process;electron transport chain…	active transmembrane transporter activity;adenyl nucleotide binding;adenyl ribonucleotide binding;ATP binding;ATPase activity;ATPase activity, coupled;ATPase activity, coupled to movement of substances;ATPase activity, coupled to transmembrane movement of ions;ATPase activity, coupled to transmembrane movement of substances;binding;catalytic activity;cation transmembrane transporter activity;cati…	cell part;cytoplasmic part;extracellular membrane-bounded organelle;extracellular organelle;extracellular region part;extracellular vesicular exosome;intracellular membrane-bounded organelle;intracellular organelle;intracellular organelle lumen;intracellular organelle part;intracellular part;macromolecular complex;membrane;membrane part;membrane-bounded organelle;membrane-bounded vesicle;membrane…	Alzheimer's disease;Huntington's disease;Oxidative phosphorylation;Parkinson's disease	ATP-synt_ab;ATP-synt_ab_C;ATP-synt_ab_N	37	37	37	68	68	68	59.75	323.31	165470000000	9910300000	155560000000	3.08395	4.2401	3.60408	4.7934	4.99459	5.00261	4.4066	3.94415	P25705;P25705-2;P25705-3;K7EK77;K7ERX7;K7ENJ4;K7EJP1;K7EQH4;K7ESA0	P25705;P25705-2;P25705-3	ATP synthase subunit alpha, mitochondrial	ATP5A1
1.94658	2.32343	2.22222	NaN	1.45307	NaN	1.29472	2.39342	2.16337	NaN	NaN	NaN	+				catabolic process;cellular catabolic process;cellular lipid catabolic process;cellular lipid metabolic process;cellular metabolic process;cellular process;cellular response to chemical stimulus;cellular response to hydrogen peroxide;cellular response to oxidative stress;cellular response to reactive oxygen species;cellular response to stimulus;cellular response to stress;hydrogen peroxide catabol…	antioxidant activity;binding;carboxylic ester hydrolase activity;catalytic activity;enzyme binding;glutathione peroxidase activity;hydrolase activity;hydrolase activity, acting on ester bonds;lipase activity;oxidoreductase activity;oxidoreductase activity, acting on paired donors, with incorporation or reduction of molecular oxygen;oxidoreductase activity, acting on peroxide as acceptor;peroxidas…	cell part;cytoplasm;cytoplasmic membrane-bounded vesicle;cytoplasmic part;cytoplasmic vesicle;cytosol;extracellular membrane-bounded organelle;extracellular organelle;extracellular region part;extracellular space;extracellular vesicular exosome;intracellular membrane-bounded organelle;intracellular organelle;intracellular part;lysosome;lytic vacuole;membrane;membrane-bounded organelle;membrane-bo…	Methane metabolism;Phenylalanine metabolism;Phenylpropanoid biosynthesis	1-cysPrx_C;AhpC-TSA	8	8	8	49.6	49.6	49.6	25.035	88.817	807530000	528390000	279140000	2.52828	2.06408	0	1.35307	1.50634	1.8505	0	NaN	P30041	P30041	Peroxiredoxin-6	PRDX6
2.74073	2.79927	2.66964	NaN	NaN	1.83762	2.06454	2.25205	2.26864	NaN	NaN	NaN	+		+		anatomical structure development;biological regulation;catabolic process;cell differentiation;cellular catabolic process;cellular chemical homeostasis;cellular component organization;cellular component organization at cellular level;cellular component organization or biogenesis;cellular component organization or biogenesis at cellular level;cellular developmental process;cellular homeostasis;cell…	alkyl hydroperoxide reductase activity;antioxidant activity;binding;caspase inhibitor activity;caspase regulator activity;catalytic activity;cysteine-type endopeptidase inhibitor activity;endopeptidase inhibitor activity;endopeptidase regulator activity;enzyme binding;enzyme inhibitor activity;enzyme regulator activity;kinase binding;oxidoreductase activity;oxidoreductase activity, acting on a su…	cell part;cytoplasm;cytoplasmic part;cytosol;early endosome;endosome;extracellular membrane-bounded organelle;extracellular organelle;extracellular region part;extracellular vesicular exosome;intracellular membrane-bounded organelle;intracellular organelle;intracellular organelle lumen;intracellular organelle part;intracellular part;membrane-bounded organelle;membrane-bounded vesicle;membrane-enc…		1-cysPrx_C;AhpC-TSA	8	8	8	46.2	46.2	46.2	25.838	43.666	1223700000	277160000	946490000	3.69459	2.63655	0	1.73762	3.01128	2.09508	0	NaN	P30048-2;P30048	P30048-2;P30048	Thioredoxin-dependent peroxide reductase, mitochondrial	PRDX3
1.44063	1.82989	0.906583	0.955313	2.26802	1.00418	1.30819	NaN	NaN	1.58919	1.55001	0.283566					acetyl-CoA catabolic process;acetyl-CoA metabolic process;anatomical structure development;carboxylic acid metabolic process;catabolic process;cellular catabolic process;cellular ketone metabolic process;cellular metabolic process;cellular process;coenzyme catabolic process;coenzyme metabolic process;cofactor catabolic process;cofactor metabolic process;developmental process;dicarboxylic acid met…	binding;catalytic activity;coenzyme binding;cofactor binding;flavin adenine dinucleotide binding;oxidoreductase activity;oxidoreductase activity, acting on the CH-CH group of donors;oxidoreductase activity, acting on the CH-CH group of donors, quinone or related compound as acceptor;succinate dehydrogenase (ubiquinone) activity;succinate dehydrogenase activity	cell part;cytoplasmic part;fumarate reductase complex;intracellular membrane-bounded organelle;intracellular organelle;intracellular organelle part;intracellular part;macromolecular complex;membrane;membrane part;membrane-bounded organelle;mitochondrial inner membrane;mitochondrial membrane;mitochondrial membrane part;mitochondrial part;mitochondrial respiratory chain complex II;mitochondrion;org…	Alzheimer's disease;Citrate cycle (TCA cycle);Huntington's disease;Oxidative phosphorylation;Parkinson's disease	FAD_binding_2;Succ_DH_flav_C	12	12	12	27.9	27.9	27.9	67.299	99.588	1181500000	438740000	742750000	1.39461	1.29237	1.03181	1.30917	0	1.20819	0.866622	1.04092	P31040-2;P31040;D6RFM5;A0A087X1I3;P31040-3;H0Y8X1	P31040-2;P31040;D6RFM5;A0A087X1I3;P31040-3	Succinate dehydrogenase [ubiquinone] flavoprotein subunit, mitochondrial	SDHA
3.24623	3.4049	3.13875	3.30179	2.39547	NaN	3.24911	3.31778	2.66848	NaN	NaN	NaN	+		+		aerobic respiration;cellular metabolic process;cellular process;cellular respiration;electron transport chain;energy derivation by oxidation of organic compounds;generation of precursor metabolites and energy;metabolic process;mitochondrial electron transport, ubiquinol to cytochrome c;oxidation-reduction process;oxidative phosphorylation;phosphate-containing compound metabolic process;phosphorus…	binding;catalytic activity;cation binding;cation transmembrane transporter activity;enzyme binding;hydrogen ion transmembrane transporter activity;inorganic cation transmembrane transporter activity;ion binding;ion transmembrane transporter activity;metal ion binding;monovalent inorganic cation transmembrane transporter activity;oxidoreductase activity;oxidoreductase activity, acting on diphenols…	cell part;cytoplasmic part;intracellular membrane-bounded organelle;intracellular organelle;intracellular organelle part;intracellular part;macromolecular complex;membrane;membrane part;membrane-bounded organelle;mitochondrial inner membrane;mitochondrial membrane;mitochondrial membrane part;mitochondrial part;mitochondrial respiratory chain;mitochondrial respiratory chain complex III;mitochondri…	Alzheimer's disease;Cardiac muscle contraction;Huntington's disease;Oxidative phosphorylation;Parkinson's disease	Peptidase_M16;Peptidase_M16_C	14	14	14	46.5	46.5	46.5	52.645	66.143	1543700000	145300000	1398400000	3.22426	3.16329	0.982875	2.74863	2.32358	2.97846	0	NaN	P31930	P31930	Cytochrome b-c1 complex subunit 1, mitochondrial	UQCRC1
2.70525	2.24077	2.68032	2.18371	2.45425	2.31342	2.01453	1.94257	1.9923	1.53057	1.57061	NaN	+	+	+		biological regulation;biosynthetic process;catabolic process;cellular biosynthetic process;cellular catabolic process;cellular macromolecule metabolic process;cellular metabolic process;cellular nitrogen compound metabolic process;cellular process;cellular response to chemical stimulus;cellular response to hydrogen peroxide;cellular response to oxidative stress;cellular response to oxygen radical…	antioxidant activity;catalytic activity;oxidoreductase activity;oxidoreductase activity, acting on paired donors, with incorporation or reduction of molecular oxygen;oxidoreductase activity, acting on peroxide as acceptor;peroxidase activity;peroxiredoxin activity;thioredoxin peroxidase activity	cell part;cytoplasm;cytoplasmic part;cytosol;extracellular membrane-bounded organelle;extracellular organelle;extracellular region part;extracellular vesicular exosome;intracellular part;membrane-bounded organelle;membrane-bounded vesicle;organelle;vesicle		1-cysPrx_C;AhpC-TSA	8	7	7	35.9	30.3	30.3	21.892	19.996	1358600000	334420000	1024100000	2.42096	2.44211	2.90684	2.21713	3.89418	1.88313	2.05624	1.45059	P32119;A6NIW5;P32119-2	P32119;A6NIW5	Peroxiredoxin-2	PRDX2
2.25184	2.30282	2.00547	5.19006	4.90386	4.77109	3.14791	3.31497	3.14379	3.3598	3.36317	NaN	+	+	+	+	cellular component assembly;cellular component assembly at cellular level;cellular component organization;cellular component organization at cellular level;cellular component organization or biogenesis;cellular component organization or biogenesis at cellular level;cellular macromolecular complex assembly;cellular macromolecular complex subunit organization;cellular membrane organization;cellular…	adenyl nucleotide binding;adenyl ribonucleotide binding;ATP binding;binding;nucleotide binding;purine nucleotide binding;purine ribonucleoside triphosphate binding;purine ribonucleotide binding;ribonucleotide binding	cell part;cytoplasmic part;cytosol;extracellular membrane-bounded organelle;extracellular organelle;extracellular region part;extracellular vesicular exosome;intracellular membrane-bounded organelle;intracellular organelle;intracellular part;membrane-bounded organelle;membrane-bounded vesicle;mitochondrion;organelle;vesicle	Antigen processing and presentation	HSP70	41	38	37	61.1	57.4	55.5	94.33	323.31	11687000000	1630600000	10056000000	2.71444	2.08671	3.18863	4.855	3.4812	3.10222	3.48308	3.26149	P34932;A0A087WYC1;A0A087WTS8;P34932-2	P34932;A0A087WYC1	Heat shock 70 kDa protein 4	HSPA4
2.02538	2.18501	3.26554	3.00083	2.59722	2.96475	2.33067	2.2577	1.8899	NaN	NaN	NaN		+	+		biological regulation;biosynthetic process;cell differentiation;cellular biosynthetic process;cellular component organization;cellular component organization at cellular level;cellular component organization or biogenesis;cellular component organization or biogenesis at cellular level;cellular developmental process;cellular macromolecule biosynthetic process;cellular macromolecule metabolic proce…	binding;complement binding;complement component C3a binding;complement component C3b binding;DNA binding;enzyme binding;G-protein-coupled receptor binding;histone deacetylase binding;nucleic acid binding;nucleic acid binding transcription factor activity;opsonin binding;protein binding;proteinase activated receptor binding;receptor binding;regulatory region DNA binding;regulatory region nucleic a…	cell part;cell surface;cytoplasm;cytoplasmic part;early endosome;endosome;extracellular membrane-bounded organelle;extracellular organelle;extracellular region part;extracellular vesicular exosome;integral to membrane;integral to plasma membrane;intracellular membrane-bounded organelle;intracellular organelle;intracellular organelle part;intracellular part;intrinsic to membrane;intrinsic to plasm…		Band_7	9	9	9	39.3	39.3	39.3	29.804	34.154	638120000	144080000	494040000	1.59333	2.39198	2.66063	2.75427	2.36072	2.05943	0	NaN	P35232;C9JW96;C9JZ20;E7ESE2;E9PCW0;P35232-2;D6RBK0	P35232;C9JW96;C9JZ20;E7ESE2;E9PCW0	Prohibitin	PHB
2.05911	2.0027	2.14434	3.75189	3.59956	3.8495	3.46937	3.36695	3.67548	1.87818	1.82249	1.81713	+	+	+	+	ATP biosynthetic process;ATP metabolic process;ATP synthesis coupled proton transport;biosynthetic process;cation transport;cellular biosynthetic process;cellular metabolic process;cellular nitrogen compound biosynthetic process;cellular nitrogen compound metabolic process;cellular process;electron transport chain;energy coupled proton transport, down electrochemical gradient;establishment of loc…	active transmembrane transporter activity;ATPase activity;ATPase activity, coupled;ATPase activity, coupled to movement of substances;ATPase activity, coupled to transmembrane movement of ions;ATPase activity, coupled to transmembrane movement of substances;catalytic activity;cation transmembrane transporter activity;cation-transporting ATPase activity;hydrogen ion transmembrane transporter activ…	cell part;cytoplasmic part;extracellular membrane-bounded organelle;extracellular organelle;extracellular region part;extracellular vesicular exosome;intracellular membrane-bounded organelle;intracellular organelle;intracellular organelle lumen;intracellular organelle part;intracellular part;macromolecular complex;membrane;membrane part;membrane-bounded organelle;membrane-bounded vesicle;membrane…	Alzheimer's disease;Huntington's disease;Oxidative phosphorylation;Parkinson's disease	ATP-synt	13	13	1	38.3	38.3	4.4	32.996	85.807	27090000000	4739900000	22351000000	3.35953	1.96872	3.39756	3.63365	3.14897	3.40393	3.89999	1.73926	P36542	P36542	ATP synthase subunit gamma, mitochondrial	ATP5C1
2.7322	2.90914	2.87011	3.93725	4.04387	3.98723	3.56815	3.60015	3.46897	3.46793	3.42667	3.43042	+	+	+	+	biological regulation;cellular macromolecule metabolic process;cellular metabolic process;cellular process;cellular protein metabolic process;establishment of localization;establishment of localization in cell;establishment of protein localization;establishment of protein localization in mitochondrion;establishment of protein localization to organelle;intracellular protein transport;intracellular…	adenyl nucleotide binding;adenyl ribonucleotide binding;ATP binding;binding;enzyme binding;nucleotide binding;protein binding;purine nucleotide binding;purine ribonucleoside triphosphate binding;purine ribonucleotide binding;ribonucleotide binding;ubiquitin protein ligase binding;unfolded protein binding	adherens junction;anchoring junction;cell junction;cell part;cell-substrate adherens junction;cell-substrate junction;cytoplasm;cytoplasmic part;extracellular membrane-bounded organelle;extracellular organelle;extracellular region part;extracellular vesicular exosome;focal adhesion;intracellular membrane-bounded organelle;intracellular non-membrane-bounded organelle;intracellular organelle;intrac…	ko05152;RNA degradation	HSP70	58	58	57	65.2	65.2	65.2	73.68	323.31	434750000000	54459000000	380290000000	3.4154	2.73715	4.20276	3.88945	3.88172	3.44576	4.8085	3.34167	P38646;D6RJI2;H0YBG6;D6RA73;H0Y8S0	P38646	Stress-70 protein, mitochondrial	HSPA9
1.40654	1.4197	1.44138	0.763836	0.811635	0.87688	0.383829	0.607484	-0.186935	-0.564542	-0.852771	0.829525	+	+				binding;DNA binding;lamin binding;nucleic acid binding;protein binding	cell part;cytoplasm;envelope;integral to membrane;intracellular membrane-bounded organelle;intracellular organelle;intracellular organelle part;intracellular part;intrinsic to membrane;membrane;membrane part;membrane-bounded organelle;nuclear envelope;nuclear inner membrane;nuclear membrane;nuclear part;nucleus;organelle;organelle envelope;organelle inner membrane;organelle membrane;organelle part		LEM;Thymopoietin	16	16	8	52.9	52.9	23.8	50.67	230.31	5186700000	2604300000	2582400000	4.22931	1.32254	2.68219	0.717451	0.258931	0.168126	0.203195	-0.29593	P42167;G5E972;P42167-2;H0YJH7;P42167-3	P42167;G5E972;P42167-2;H0YJH7;P42167-3	Lamina-associated polypeptide 2, isoforms beta/gamma;Thymopoietin;Thymopentin	TMPO
1.26742	1.16556	1.24696	0.952184	0.402831	0.358734	NaN	NaN	NaN	-0.815351	-0.714657	0.0487942	+				biological regulation;blood coagulation;coagulation;hemostasis;multicellular organismal process;negative regulation of biological process;negative regulation of biosynthetic process;negative regulation of cellular biosynthetic process;negative regulation of cellular macromolecule biosynthetic process;negative regulation of cellular metabolic process;negative regulation of cellular process;negativ…	binding;binding, bridging;chromatin binding;histone binding;methylated histone residue binding;protein binding;protein binding, bridging;repressing transcription factor binding;transcription factor binding	cell part;centromeric heterochromatin;chromatin;chromatin remodeling complex;chromocenter;chromosomal part;envelope;heterochromatin;histone deacetylase complex;histone methyltransferase complex;intracellular membrane-bounded organelle;intracellular non-membrane-bounded organelle;intracellular organelle;intracellular organelle part;intracellular part;kinetochore;macromolecular complex;membrane-bou…		Chromo;Chromo_shadow	10	10	9	53.4	53.4	47.1	22.225	71.548	6442900000	3496500000	2946400000	3.11832	1.12664	0.878459	0.47125	0	NaN	0.791859	-0.593738	P45973;F8VNY3	P45973	Chromobox protein homolog 5	CBX5
3.03399	3.00576	2.97646	3.09033	3.10167	3.07053	4.26888	4.0889	4.02989	1.93108	2.07337	2.00069	+	+	+	+	ATP biosynthetic process;ATP metabolic process;ATP synthesis coupled proton transport;biosynthetic process;cation transport;cellular biosynthetic process;cellular metabolic process;cellular nitrogen compound biosynthetic process;cellular nitrogen compound metabolic process;cellular process;electron transport chain;energy coupled proton transport, down electrochemical gradient;establishment of loc…	binding;cation transmembrane transporter activity;drug binding;hydrogen ion transmembrane transporter activity;hydrogen ion transporting ATP synthase activity, rotational mechanism;inorganic cation transmembrane transporter activity;ion transmembrane transporter activity;monovalent inorganic cation transmembrane transporter activity;substrate-specific transmembrane transporter activity;substrate-…	cell part;cytoplasmic part;extracellular membrane-bounded organelle;extracellular organelle;extracellular region part;extracellular vesicular exosome;intracellular membrane-bounded organelle;intracellular organelle;intracellular organelle part;intracellular part;macromolecular complex;membrane;membrane part;membrane-bounded organelle;membrane-bounded vesicle;mitochondrial inner membrane;mitochond…	Alzheimer's disease;Huntington's disease;Oxidative phosphorylation;Parkinson's disease	OSCP	12	12	12	67.1	67.1	67.1	23.277	115.57	22007000000	2482500000	19524000000	4.48575	2.9054	5.0326	2.98751	3.49748	4.02923	3.33132	1.90171	P48047;H7C0C1;H7C086;H7C068	P48047;H7C0C1	ATP synthase subunit O, mitochondrial	ATP5O
1.63227	1.42809	1.40665	4.21506	4.22018	4.22574	1.93727	1.86849	1.99092	1.38433	1.28374	1.12565	+	+	+		biosynthetic process;cellular biosynthetic process;cellular component organization;cellular component organization at cellular level;cellular component organization or biogenesis;cellular component organization or biogenesis at cellular level;cellular macromolecule biosynthetic process;cellular macromolecule metabolic process;cellular metabolic process;cellular process;cellular protein metabolic …	binding;catalytic activity;GTP binding;GTPase activity;guanyl nucleotide binding;guanyl ribonucleotide binding;hydrolase activity;hydrolase activity, acting on acid anhydrides;hydrolase activity, acting on acid anhydrides, in phosphorus-containing anhydrides;nucleic acid binding;nucleoside-triphosphatase activity;nucleotide binding;purine nucleotide binding;purine ribonucleoside triphosphate bind…	cell part;cytoplasmic part;extracellular membrane-bounded organelle;extracellular organelle;extracellular region part;extracellular vesicular exosome;intracellular membrane-bounded organelle;intracellular non-membrane-bounded organelle;intracellular organelle;intracellular organelle part;intracellular part;membrane;membrane-bounded organelle;membrane-bounded vesicle;mitochondrial nucleoid;mitocho…	Plant-pathogen interaction	GTP_EFTU;GTP_EFTU_D2;GTP_EFTU_D3	27	27	27	69.7	69.7	69.7	49.541	323.31	28122000000	5296600000	22825000000	2.57368	1.389	6.25163	4.12032	3.42741	1.83223	2.38162	1.16457	P49411;H3BNU3	P49411	Elongation factor Tu, mitochondrial	TUFM
2.19058	1.48275	1.49375	2.29302	2.65819	2.78789	1.7566	1.63241	1.84687	1.1137	1.12862	NaN		+	+		binding of sperm to zona pellucida;cell recognition;cell-cell recognition;cellular component assembly;cellular component assembly at cellular level;cellular component organization;cellular component organization at cellular level;cellular component organization or biogenesis;cellular component organization or biogenesis at cellular level;cellular macromolecule metabolic process;cellular metabolic…	adenyl nucleotide binding;adenyl ribonucleotide binding;ATP binding;ATPase activity;ATPase activity, coupled;binding;catalytic activity;hydrolase activity;hydrolase activity, acting on acid anhydrides;hydrolase activity, acting on acid anhydrides, in phosphorus-containing anhydrides;nucleoside-triphosphatase activity;nucleotide binding;purine nucleotide binding;purine ribonucleoside triphosphate …	aggresome;cell body;cell part;centrosome;chaperonin-containing T-complex;cytoplasm;cytoplasmic part;cytoskeletal part;cytoskeleton;cytosol;cytosolic part;extracellular membrane-bounded organelle;extracellular organelle;extracellular region part;extracellular vesicular exosome;inclusion body;intermediate filament cytoskeleton;intracellular non-membrane-bounded organelle;intracellular organelle;int…		Cpn60_TCP1	24	24	24	50.5	50.5	50.5	59.62	72.828	4272400000	1252900000	3019600000	1.69468	1.62236	2.44971	2.4797	2.84627	1.64529	2.3324	1.02116	P50990;P50990-2;P50990-3;H7C4C8;H7C2U0	P50990;P50990-2;P50990-3;H7C4C8	T-complex protein 1 subunit theta	CCT8
1.08957	1.14939	1.15937	5.52312	5.68728	4.93234	1.74485	1.64856	1.6241	0.570851	0.609282	NaN	+	+	+		binding of sperm to zona pellucida;cell recognition;cell-cell recognition;cellular macromolecule metabolic process;cellular metabolic process;cellular process;cellular process involved in reproduction;cellular protein metabolic process;'de novo' posttranslational protein folding;'de novo' protein folding;macromolecule metabolic process;metabolic process;primary metabolic process;protein folding;p…	adenyl nucleotide binding;adenyl ribonucleotide binding;ATP binding;binding;nucleotide binding;protein binding;purine nucleotide binding;purine ribonucleoside triphosphate binding;purine ribonucleotide binding;ribonucleotide binding;unfolded protein binding	cell body;cell part;centrosome;chaperonin-containing T-complex;cytoplasm;cytoplasmic membrane-bounded vesicle;cytoplasmic part;cytoplasmic vesicle;cytoskeletal part;cytosol;cytosolic part;extracellular membrane-bounded organelle;extracellular organelle;extracellular region part;extracellular vesicular exosome;intracellular membrane-bounded organelle;intracellular non-membrane-bounded organelle;in…		Cpn60_TCP1	32	32	32	69.4	69.4	69.4	57.924	323.31	26812000000	2323500000	24489000000	3.35155	1.03278	2.72607	5.28092	3.26052	1.5725	1.60295	0.490067	P50991;P50991-2	P50991;P50991-2	T-complex protein 1 subunit delta	CCT4
3.20856	3.57483	2.9737	NaN	4.1819	4.48478	2.56901	3.45194	2.8536	2.1583	2.28428	NaN	+				biological regulation;cellular process;cellular response to stimulus;establishment of localization;establishment of localization in cell;establishment of protein localization;intracellular protein transport;intracellular signal transduction;intracellular transport;metabolic process;plasma membrane to endosome transport;protein transport;Rab protein signal transduction;Ras protein signal transduct…	acetyltransferase activity;binding;catalytic activity;GDP binding;GTP binding;GTPase activity;guanyl nucleotide binding;guanyl ribonucleotide binding;histone acetyltransferase activity;hydrolase activity;hydrolase activity, acting on acid anhydrides;hydrolase activity, acting on acid anhydrides, in phosphorus-containing anhydrides;lysine N-acetyltransferase activity;N-acetyltransferase activity;N…	cell part;cytoplasmic membrane-bounded vesicle;cytoplasmic part;cytoplasmic vesicle;early endosome;early endosome membrane;endocytic vesicle;endosomal part;endosome;endosome membrane;extracellular membrane-bounded organelle;extracellular organelle;extracellular region part;extracellular vesicular exosome;intracellular membrane-bounded organelle;intracellular organelle;intracellular organelle part…	Amoebiasis;Endocytosis;ko05152;Phagosome;Vasopressin-regulated water reabsorption	PCAF_N;Ras	9	9	6	60.6	60.6	45.8	23.482	62.369	1708800000	190150000	1518700000	2.51366	3.15237	1.64274	4.23334	2.08696	2.85818	1.7236	2.12129	P51148;P51148-2;K7ERI8;K7ERQ8;F8VVK3;F8VWU4;K7ENY4;F8VVZ0;F8VUA5;F8VSF8;K7EIP6;F8WCY6;F8WD79;F8VPW9;F8VWZ7	P51148;P51148-2;K7ERI8;K7ERQ8;F8VVK3	Ras-related protein Rab-5C	RAB5C
2.63338	2.1034	2.58072	2.36558	4.14763	3.77915	1.67292	1.27911	1.02942	NaN	NaN	NaN					actin cytoskeleton organization;actin filament-based process;biological regulation;cell chemotaxis;cell junction assembly;cell junction organization;cell migration;cell motility;cell projection organization;cell-cell junction assembly;cell-cell junction organization;cellular component assembly;cellular component assembly at cellular level;cellular component movement;cellular component organizatio…	binding;catalytic activity;GTP binding;GTPase activity;guanyl nucleotide binding;guanyl ribonucleotide binding;hydrolase activity;hydrolase activity, acting on acid anhydrides;hydrolase activity, acting on acid anhydrides, in phosphorus-containing anhydrides;nucleoside-triphosphatase activity;nucleotide binding;purine nucleotide binding;purine ribonucleoside triphosphate binding;purine ribonucleo…	cell junction;cell part;cell projection;cell-cell junction;cytoplasm;cytoplasmic membrane-bounded vesicle;cytoplasmic part;cytoplasmic vesicle;cytoplasmic vesicle membrane;cytoplasmic vesicle part;endocytic vesicle;endosomal part;endosome;endosome membrane;extracellular membrane-bounded organelle;extracellular organelle;extracellular region part;extracellular vesicular exosome;Golgi apparatus par…	Tight junction	Ras	7	7	4	33.5	33.5	20.7	22.774	18.28	1256100000	239210000	1016900000	2.28792	2.33917	1.59221	3.33079	1.64754	1.22715	0	NaN	P51153;A0A087WWB9	P51153	Ras-related protein Rab-13	RAB13
0.867343	1.5009	1.65187	0.53097	NaN	0.32435	2.78056	2.28312	3.81721	0.473112	-0.194542	NaN					biological regulation;biosynthetic process;carbohydrate metabolic process;carbohydrate transport;cell cycle;cell cycle process;cell surface receptor linked signaling pathway;cellular biosynthetic process;cellular component assembly;cellular component assembly at cellular level;cellular component disassembly;cellular component disassembly at cellular level;cellular component organization;cellular …	binding;peptide binding;structural constituent of nuclear pore;structural molecule activity;transporter activity	cell part;cytoplasmic part;cytosol;envelope;inclusion body;intracellular organelle part;intracellular part;macromolecular complex;membrane;membrane part;nuclear envelope;nuclear inclusion body;nuclear membrane;nuclear part;nuclear periphery;nuclear pore;nucleoplasm;Nup107-160 complex;organelle envelope;organelle membrane;organelle part;pore complex;protein complex	RNA transport	Nucleoporin2;Nup96	18	18	18	12.1	12.1	12.1	186.27	58.716	1567700000	637510000	930220000	1.44891	1.24004	0.711208	0.32766	1.61867	2.8603	0.0336583	0.0392845	P52948-6;P52948-2;P52948-5;P52948;P52948-4;P52948-3;H7C3P6;H0YCT1;H0YCR0;H0YEN4;H0YDF4	P52948-6;P52948-2;P52948-5;P52948;P52948-4;P52948-3	Nuclear pore complex protein Nup98-Nup96;Nuclear pore complex protein Nup98;Nuclear pore complex protein Nup96	NUP98
1.47098	1.27399	1.17728	0.61438	0.545178	0.421802	NaN	0.755571	-1.71255	-1.19406	-0.986273	-1.16991	+				cellular component biogenesis;cellular component biogenesis at cellular level;cellular component organization or biogenesis;cellular component organization or biogenesis at cellular level;cellular macromolecule metabolic process;cellular metabolic process;cellular nitrogen compound metabolic process;cellular process;gene expression;macromolecule metabolic process;metabolic process;mRNA metabolic …	binding;box C/D snoRNA binding;nucleic acid binding;RNA binding;snoRNA binding;snRNA binding;U3 snoRNA binding;U4 snRNA binding	box C/D snoRNP complex;cell part;intracellular membrane-bounded organelle;intracellular non-membrane-bounded organelle;intracellular organelle;intracellular organelle part;intracellular part;macromolecular complex;membrane-bounded organelle;non-membrane-bounded organelle;nuclear part;nucleolar part;nucleolus;nucleoplasm;nucleus;organelle;organelle part;protein complex;ribonucleoprotein complex;sm…	Ribosome biogenesis in eukaryotes;Spliceosome	Ribosomal_L7Ae	10	10	10	53.9	53.9	53.9	14.173	88.147	10026000000	4961200000	5065200000	2.29386	1.20742	1.77091	0.42712	0.142103	-0.57849	2.53836	-1.21675	P55769;B1AHD1	P55769;B1AHD1	NHP2-like protein 1;NHP2-like protein 1, N-terminally processed	NHP2L1
NaN	2.31057	2.34284	NaN	NaN	NaN	NaN	3.24513	NaN	NaN	NaN	1.18078	+				ATP biosynthetic process;ATP metabolic process;ATP synthesis coupled proton transport;biosynthetic process;cation transport;cellular biosynthetic process;cellular metabolic process;cellular nitrogen compound biosynthetic process;cellular nitrogen compound metabolic process;cellular process;electron transport chain;energy coupled proton transport, down electrochemical gradient;establishment of loc…	cation transmembrane transporter activity;hydrogen ion transmembrane transporter activity;inorganic cation transmembrane transporter activity;ion transmembrane transporter activity;monovalent inorganic cation transmembrane transporter activity;substrate-specific transmembrane transporter activity;substrate-specific transporter activity;transmembrane transporter activity;transporter activity	cell part;cytoplasmic part;intracellular membrane-bounded organelle;intracellular organelle;intracellular organelle part;intracellular part;macromolecular complex;membrane;membrane part;membrane-bounded organelle;mitochondrial inner membrane;mitochondrial membrane;mitochondrial membrane part;mitochondrial part;mitochondrial proton-transporting ATP synthase complex;mitochondrial proton-transportin…	Oxidative phosphorylation	ATP-synt_E	3	3	3	44.9	44.9	44.9	7.9331	4.3827	144430000	24396000	120030000	2.33607	2.22671	0	NaN	0	3.14513	0	1.08078	P56385	P56385	ATP synthase subunit e, mitochondrial	ATP5I
3.30955	3.23102	2.99496	4.88186	4.86528	4.71875	3.01012	3.08566	3.24182	NaN	2.09936	1.9843	+	+	+		cellular component assembly;cellular component assembly at cellular level;cellular component organization;cellular component organization at cellular level;cellular component organization or biogenesis;cellular component organization or biogenesis at cellular level;cellular localization;cellular macromolecular complex assembly;cellular macromolecular complex subunit organization;cellular macromol…	structural constituent of nuclear pore;structural molecule activity	cell part;cytoplasmic membrane-bounded vesicle;cytoplasmic part;cytoplasmic vesicle;endoplasmic reticulum;extracellular membrane-bounded organelle;extracellular organelle;extracellular region part;extracellular vesicular exosome;integral to membrane;intracellular membrane-bounded organelle;intracellular organelle;intracellular organelle part;intracellular part;intrinsic to membrane;macromolecular…		UPF0121	9	9	9	35.6	35.6	35.6	27.978	51.45	5990700000	648960000	5341700000	3.02612	3.07851	3.91918	4.72196	3.29032	3.01253	1.72455	1.94183	P57088;D6RAA6;H0Y8N0;J3KN43;D6RBY2	P57088;D6RAA6	Transmembrane protein 33	TMEM33
4.1903	4.10635	3.78837	4.68846	4.14029	4.23932	1.79954	2.14649	2.03503	1.34466	NaN	1.08977	+	+	+		antigen processing and presentation;antigen processing and presentation of exogenous antigen;antigen processing and presentation of exogenous peptide antigen;antigen processing and presentation of exogenous peptide antigen via MHC class I;antigen processing and presentation of exogenous peptide antigen via MHC class I, TAP-dependent;antigen processing and presentation of peptide antigen;antigen p…	binding;epidermal growth factor binding;growth factor binding;hormone binding;protein binding	cell part;cytoplasmic part;cytosol;endoplasmic reticulum;endoplasmic reticulum membrane;endoplasmic reticulum part;endoplasmic reticulum Sec complex;integral to membrane;intracellular membrane-bounded organelle;intracellular organelle;intracellular organelle part;intracellular part;intrinsic to membrane;macromolecular complex;membrane;membrane part;membrane-bounded organelle;organelle;organelle m…	Phagosome;Protein export;Protein processing in endoplasmic reticulum;Vibrio cholerae infection	Sec61_beta	3	3	3	37.5	37.5	37.5	9.9743	17.652	4915400000	598100000	4317300000	3.01344	3.92834	2.80501	4.25602	2.53705	1.89369	1.14081	1.11721	P60468;S4R3B5	P60468	Protein transport protein Sec61 subunit beta	SEC61B
2.12846	2.07224	NaN	NaN	3.36443	3.20908	NaN	NaN	2.49746	2.93742	2.46415	NaN					activation of MAPKK activity;activation of protein kinase activity;anatomical structure development;biological regulation;blood coagulation;cell activation;cell development;cell proliferation;cell surface receptor linked signaling pathway;cellular developmental process;cellular macromolecule metabolic process;cellular metabolic process;cellular process;cellular protein metabolic process;cellular …	binding;catalytic activity;enzyme regulator activity;GDP binding;GTP binding;GTPase activity;GTPase regulator activity;guanyl nucleotide binding;guanyl ribonucleotide binding;guanyl-nucleotide exchange factor activity;hydrolase activity;hydrolase activity, acting on acid anhydrides;hydrolase activity, acting on acid anhydrides, in phosphorus-containing anhydrides;nucleoside-triphosphatase activit…	cell junction;cell part;cell projection;cell-cell junction;cytoplasm;cytoplasmic part;cytosol;early endosome;endosome;extracellular membrane-bounded organelle;extracellular organelle;extracellular region part;extracellular vesicular exosome;guanyl-nucleotide exchange factor complex;intracellular;intracellular membrane-bounded organelle;intracellular organelle;intracellular part;late endosome;lipi…	Chemokine signaling pathway;Focal adhesion;Leukocyte transendothelial migration;Long-term potentiation;MAPK signaling pathway;Neurotrophin signaling pathway;Pancreatic secretion;Renal cell carcinoma	Ras	9	9	8	53.8	53.8	50	20.987	50.082	1035400000	131730000	903700000	2.04843	2.00035	1.80926	3.18676	0	2.39746	1.23834	2.60078	P62834;A0A075B6Q0;P61224-2;P61224-3;P61224;F5H004;F5GX62;E7ESV4;A0A0J9YXB3;F5H7Y6;A6NIZ1;F5H4H0;F5GYH7;F5H077;F5GWU8;F5H491;F5H0B7;F5H500;F5H6R7;F5GYB5;P61224-4;F5H823;B7ZB78;F5GZG1;F8WBC0	P62834;A0A075B6Q0;P61224-2;P61224-3;P61224;F5H004;F5GX62;E7ESV4;A0A0J9YXB3;F5H7Y6;A6NIZ1	Ras-related protein Rap-1A;Ras-related protein Rap-1b;Ras-related protein Rap-1b-like protein	RAP1A;RAP1B
3.02451	2.81036	2.78362	NaN	NaN	1.21524	1.76129	1.84707	1.62985	1.87696	1.88951	1.58241	+		+		biosynthetic process;catabolic process;cellular biosynthetic process;cellular catabolic process;cellular component biogenesis;cellular component biogenesis at cellular level;cellular component disassembly;cellular component disassembly at cellular level;cellular component organization;cellular component organization at cellular level;cellular component organization or biogenesis;cellular componen…	structural constituent of ribosome;structural molecule activity	cell part;cytoplasm;cytoplasmic part;cytosol;cytosolic small ribosomal subunit;extracellular membrane-bounded organelle;extracellular organelle;extracellular region part;extracellular vesicular exosome;intracellular organelle part;intracellular part;macromolecular complex;membrane-bounded organelle;membrane-bounded vesicle;organelle;organelle part;ribonucleoprotein complex;small ribosomal subunit…	Ribosome	Ribosomal_S28e	5	5	5	56.5	56.5	56.5	7.8409	49.168	2442000000	703920000	1738000000	3.12206	2.77283	0	1.11524	2.83285	1.64607	2.45151	1.68296	P62857	P62857	40S ribosomal protein S28	RPS28
1.99164	2.01628	1.83495	2.29919	2.18012	1.87511	0.43328	0.364797	0.373286	0.761881	1.15452	NaN	+	+			activation of adenylate cyclase activity;activation of adenylate cyclase activity by dopamine receptor signaling pathway;activation of adenylate cyclase activity by G-protein signaling pathway;activation of phospholipase C activity;activation of phospholipase C activity by G-protein coupled receptor protein signaling pathway coupled to IP3 second messenger;anatomical structure development;apoptos…	binding;catalytic activity;enzyme binding;GTPase activity;GTPase binding;hydrolase activity;hydrolase activity, acting on acid anhydrides;hydrolase activity, acting on acid anhydrides, in phosphorus-containing anhydrides;molecular transducer activity;nucleoside-triphosphatase activity;protein binding;protein complex binding;pyrophosphatase activity;signal transducer activity	cell body;cell part;cell projection;cell projection part;cilium part;cytoplasmic part;dendrite;extracellular membrane-bounded organelle;extracellular organelle;extracellular region part;extracellular vesicular exosome;extrinsic to internal side of plasma membrane;extrinsic to membrane;extrinsic to plasma membrane;heterotrimeric G-protein complex;intracellular;intracellular organelle part;intracel…	Chemokine signaling pathway;Phototransduction;Taste transduction	WD40	15	9	8	64.1	42.9	33.8	37.377	252.46	5770900000	2727000000	3043900000	3.0254	1.84763	2.40977	2.01814	2.26272	0.290454	0.844156	0.8582	P62873;P62873-2;F6UT28;B1AKQ8;F6X3N5;B3KVK2	P62873;P62873-2;F6UT28;B1AKQ8;F6X3N5	Guanine nucleotide-binding protein G(I)/G(S)/G(T) subunit beta-1	GNB1
1.85949	1.74476	1.77374	1.89786	1.84503	1.94257	0.287591	0.252052	0.172487	0.68724	0.630312	0.560226	+	+			biological regulation;cell communication;cell surface receptor linked signaling pathway;cell-cell signaling;cellular metabolic process;cellular process;cellular response to chemical stimulus;cellular response to endogenous stimulus;cellular response to glucagon stimulus;cellular response to hormone stimulus;cellular response to organic substance;cellular response to peptide hormone stimulus;cellu…	binding;calcium channel regulator activity;catalytic activity;channel regulator activity;enzyme binding;GTPase activity;GTPase binding;hydrolase activity;hydrolase activity, acting on acid anhydrides;hydrolase activity, acting on acid anhydrides, in phosphorus-containing anhydrides;molecular transducer activity;nucleoside-triphosphatase activity;protein binding;protein complex binding;pyrophospha…	adherens junction;anchoring junction;cell body;cell junction;cell part;cell-substrate adherens junction;cell-substrate junction;cytoplasmic part;extracellular membrane-bounded organelle;extracellular organelle;extracellular region part;extracellular space;extracellular vesicular exosome;focal adhesion;intracellular organelle part;intracellular part;lysosomal membrane;macromolecular complex;membra…	Chemokine signaling pathway	WD40	16	16	7	61.2	61.2	32.1	37.331	323.31	27045000000	13344000000	13701000000	3.38318	1.69267	3.60816	1.79515	1.25004	0.137377	2.31494	0.525926	P62879;E7EP32;C9JXA5;C9JIS1;C9JZN1;P62879-2;C9JD14;F5H8J8;F5H100;F5H0S8;E9PCP0;P16520-2;P16520	P62879;E7EP32;C9JXA5;C9JIS1;C9JZN1;P62879-2	Guanine nucleotide-binding protein G(I)/G(S)/G(T) subunit beta-2	GNB2
4.37212	4.13865	4.33256	NaN	2.94345	2.92645	2.06157	2.22876	2.73229	3.37379	3.56998	3.63192	+	+		+	biological regulation;biosynthetic process;blood coagulation;cell activation;cell migration;cell motility;cellular biosynthetic process;cellular component assembly;cellular component assembly at cellular level;cellular component movement;cellular component organization;cellular component organization at cellular level;cellular component organization or biogenesis;cellular component organization o…	binding;catalytic activity;cis-trans isomerase activity;isomerase activity;peptide binding;peptidyl-prolyl cis-trans isomerase activity;protein binding;unfolded protein binding;virion binding	adherens junction;anchoring junction;cell junction;cell part;cell-substrate adherens junction;cell-substrate junction;cytoplasmic part;cytosol;extracellular membrane-bounded organelle;extracellular organelle;extracellular region;extracellular region part;extracellular space;extracellular vesicular exosome;focal adhesion;intracellular membrane-bounded organelle;intracellular organelle;intracellula…		Pro_isomerase	13	13	13	71.5	71.5	71.5	18.012	210.51	18094000000	5832900000	12261000000	3.52643	4.18111	2.7193	2.83495	2.0972	2.24087	3.28772	3.42523	P62937;F8WE65;C9J5S7;P62937-2;E5RIZ5;P0DN26;A0A0H2UH34;A0A0B4J2A2;A0A075B767;A0A075B759;Q9Y536;F5H284;P0DN37	P62937;F8WE65;C9J5S7;P62937-2	Peptidyl-prolyl cis-trans isomerase A;Peptidyl-prolyl cis-trans isomerase A, N-terminally processed;Peptidyl-prolyl cis-trans isomerase	PPIA
1.48481	1.62546	1.79797	2.43243	0.963696	0.886277	1.01228	1.17441	0.900722	0.0985544	0.491494	0.128293	+				activation of immune response;activation of innate immune response;activation of MAPK activity;adipose tissue development;alcohol metabolic process;anaphase-promoting complex-dependent proteasomal ubiquitin-dependent protein catabolic process;anatomical structure development;anatomical structure morphogenesis;antigen processing and presentation;antigen processing and presentation of exogenous ant…	binding;cation binding;enzyme binding;ion binding;metal ion binding;protease binding;protein binding;structural constituent of ribosome;structural molecule activity	cell body;cell part;cell projection;cytoplasm;cytoplasmic part;cytoplasmic vesicle membrane;cytoplasmic vesicle part;cytosol;cytosolic small ribosomal subunit;endocytic vesicle membrane;endosomal part;endosome membrane;extracellular membrane-bounded organelle;extracellular organelle;extracellular region part;extracellular vesicular exosome;intracellular membrane-bounded organelle;intracellular no…	Parkinson's disease;PPAR signaling pathway;Ribosome	Ribosomal_S27;ubiquitin	10	10	4	64.1	64.1	26.9	17.965	157.13	98407000000	33919000000	64488000000	2.46124	1.53608	0.926033	1.32747	2.14066	0.929137	0.414917	0.139447	P62979;J3QS39;J3QTR3;F5H6Q2;F5GYU3;F5H2Z3;F5H265;B4DV12;F5H388;F5H747;F5GXK7;J3QKN0;Q5PY61;Q96C32;P0CG47;P0CG48;M0R1V7;J3QSA3;F5GZ39;M0R1M6	P62979;J3QS39;J3QTR3;F5H6Q2;F5GYU3;F5H2Z3;F5H265;B4DV12;F5H388;F5H747;F5GXK7;J3QKN0;Q5PY61;Q96C32;P0CG47;P0CG48;M0R1V7	Ubiquitin-40S ribosomal protein S27a;Ubiquitin;40S ribosomal protein S27a;Polyubiquitin-B;Ubiquitin;Polyubiquitin-C;Ubiquitin	RPS27A;UBB;UBC;UBA52
2.84728	2.5289	2.71875	NaN	1.50716	NaN	1.97431	2.12869	2.24607	2.48362	2.71721	NaN	+		+		aging;anatomical structure formation involved in morphogenesis;anatomical structure morphogenesis;axon guidance;biological regulation;blood coagulation;branching involved in embryonic placenta morphogenesis;cell activation;cell communication;cell migration;cell motility;cell surface receptor linked signaling pathway;cell-cell signaling;cellular component assembly;cellular component movement;cellu…	binding;binding, bridging;cytokine receptor binding;enzyme binding;ephrin receptor binding;epidermal growth factor receptor binding;growth factor receptor binding;identical protein binding;insulin receptor substrate binding;kinase binding;neurotrophin receptor binding;neurotrophin TRK receptor binding;neurotrophin TRKA receptor binding;protein binding;protein binding, bridging;protein domain spec…	cell junction;cell part;cell-cell junction;cytoplasm;cytoplasmic part;cytosol;endosome;extracellular membrane-bounded organelle;extracellular organelle;extracellular region part;extracellular vesicular exosome;Golgi apparatus;Grb2-EGFR complex;intracellular membrane-bounded organelle;intracellular non-membrane-bounded organelle;intracellular organelle;intracellular organelle part;intracellular pa…	Acute myeloid leukemia;B cell receptor signaling pathway;Chemokine signaling pathway;Chronic myeloid leukemia;Dorso-ventral axis formation;Endometrial cancer;ErbB signaling pathway;Fc epsilon RI signaling pathway;Focal adhesion;Gap junction;Glioma;GnRH signaling pathway;Hepatitis C;Insulin signaling pathway;Jak-STAT signaling pathway;MAPK signaling pathway;MAPK signaling pathway - fly;Natural kil…	SH2;SH3_1	9	9	9	39.2	39.2	39.2	25.206	30.685	1465100000	318990000	1146100000	2.89816	2.59831	0	1.40716	2.81825	2.01636	1.52703	2.50042	P62993;P62993-2;J3KT38;J3QRL5;J3QLF6	P62993;P62993-2	Growth factor receptor-bound protein 2	GRB2
1.36081	NaN	1.46315	2.82849	3.96551	3.53107	1.14117	1.27548	1.07197	0.792689	0.920141	0.393087			+		actin cytoskeleton organization;actin filament organization;actin filament polymerization;actin filament-based process;actin polymerization or depolymerization;anatomical structure arrangement;anatomical structure homeostasis;anatomical structure morphogenesis;auditory receptor cell morphogenesis;axon guidance;biological adhesion;biological regulation;blood coagulation;bone resorption;cell activa…	binding;calcium-dependent protein binding;catalytic activity;enzyme binding;GDP-dissociation inhibitor binding;GTP binding;GTPase activity;guanyl nucleotide binding;guanyl ribonucleotide binding;hydrolase activity;hydrolase activity, acting on acid anhydrides;hydrolase activity, acting on acid anhydrides, in phosphorus-containing anhydrides;nucleoside-triphosphatase activity;nucleotide binding;pr…	adherens junction;anchoring junction;cell body;cell junction;cell part;cell periphery;cell projection;cell projection membrane;cell projection part;cell-substrate adherens junction;cell-substrate junction;cytoplasm;cytoplasmic membrane-bounded vesicle;cytoplasmic part;cytoplasmic vesicle;cytoskeletal part;cytosol;endomembrane system;endoplasmic reticulum membrane;endoplasmic reticulum part;extrac…	Adherens junction;Amyotrophic lateral sclerosis (ALS);Axon guidance;B cell receptor signaling pathway;Bacterial invasion of epithelial cells;Chemokine signaling pathway;Colorectal cancer;Epithelial cell signaling in Helicobacter pylori infection;Fc epsilon RI signaling pathway;Fc gamma R-mediated phagocytosis;Focal adhesion;Leukocyte transendothelial migration;MAPK signaling pathway;Natural kille…	Ras	10	10	6	48.8	48.8	29.4	23.467	34.522	5239400000	1190900000	4048500000	1.60526	1.31198	2.01395	3.34169	2.50243	1.06287	1.2003	0.601972	P63000-2;P63000;P60763;J3KSC4;J3QLK0	P63000-2;P63000;P60763	Ras-related C3 botulinum toxin substrate 1;Ras-related C3 botulinum toxin substrate 3	RAC1;RAC3
1.29119	1.44557	1.37351	0.684639	0.53446	0.366924	-0.0917712	-0.0618271	-0.0667899	0.204767	0.278936	0.218595	+		+		antigen processing and presentation;antigen processing and presentation of exogenous antigen;antigen processing and presentation of exogenous peptide antigen;antigen processing and presentation of exogenous peptide antigen via MHC class II;antigen processing and presentation of peptide antigen;antigen processing and presentation of peptide antigen via MHC class II;antigen processing and presentat…	binding;clathrin binding;peptide binding;protein binding;protein transporter activity;signal sequence binding;substrate-specific transporter activity;transporter activity	AP-2 adaptor complex;AP-type membrane coat adaptor complex;cell part;clathrin adaptor complex;clathrin coated vesicle membrane;clathrin-coated endocytic vesicle membrane;coated vesicle membrane;cytoplasmic part;cytoplasmic vesicle membrane;cytoplasmic vesicle part;cytosol;endocytic vesicle membrane;intracellular membrane-bounded organelle;intracellular organelle;intracellular organelle part;intra…	Endocrine and other factor-regulated calcium reabsorption;Endocytosis;Huntington's disease	Adaptin_N;Alpha_adaptinC2;B2-adapt-app_C	29	29	29	34.8	34.8	34.8	104.55	208.62	4512200000	2083100000	2429100000	2.90985	1.27009	1.36759	0.428674	2.54651	-0.173463	1.55839	0.134099	P63010;P63010-2;P63010-3;A0A087X253;A0A087WU93;A0A087WZQ6;A0A087WYD1;Q10567-4;Q10567-3;Q10567-2;Q10567;C9J1E7;K7EN71;K7ERB2;K7EJ01;K7EJX1;H7C034;A0A087WXS3;K7EKZ5	P63010;P63010-2;P63010-3;A0A087X253;A0A087WU93;A0A087WZQ6;A0A087WYD1	AP-2 complex subunit beta	AP2B1
NaN	3.20083	3.33428	NaN	NaN	NaN	1.12439	1.04705	0.595217	1.43055	NaN	1.91552					biological regulation;cell communication;cell surface receptor linked signaling pathway;cell-cell signaling;cellular metabolic process;cellular process;cellular response to chemical stimulus;cellular response to endogenous stimulus;cellular response to glucagon stimulus;cellular response to hormone stimulus;cellular response to organic substance;cellular response to peptide hormone stimulus;cellu…	binding;catalytic activity;GTPase activity;hydrolase activity;hydrolase activity, acting on acid anhydrides;hydrolase activity, acting on acid anhydrides, in phosphorus-containing anhydrides;molecular transducer activity;nucleoside-triphosphatase activity;PDZ domain binding;protein binding;protein domain specific binding;pyrophosphatase activity;signal transducer activity	cell part;extracellular membrane-bounded organelle;extracellular organelle;extracellular region part;extracellular vesicular exosome;extrinsic to internal side of plasma membrane;extrinsic to membrane;extrinsic to plasma membrane;heterotrimeric G-protein complex;intracellular part;macromolecular complex;membrane;membrane part;membrane-bounded organelle;membrane-bounded vesicle;organelle;plasma me…	Chemokine signaling pathway	G-gamma	4	4	4	39.7	39.7	39.7	7.3184	8.7178	567310000	193390000	373910000	1.87262	3.16756	0	NaN	1.42023	0.82222	1.01158	1.57304	P63218	P63218	Guanine nucleotide-binding protein G(I)/G(S)/G(O) subunit gamma-5	GNG5
1.30007	1.21841	1.30539	2.80236	3.1558	3.53319	1.38709	1.52446	1.19975	0.6124	0.506094	0.336969	+	+			cell division;cellular component assembly;cellular component assembly at cellular level;cellular component organization;cellular component organization at cellular level;cellular component organization or biogenesis;cellular component organization or biogenesis at cellular level;cellular macromolecular complex assembly;cellular macromolecular complex subunit organization;cellular macromolecule me…	binding;catalytic activity;double-stranded RNA binding;enzyme binding;GTP binding;GTPase activity;guanyl nucleotide binding;guanyl ribonucleotide binding;hydrolase activity;hydrolase activity, acting on acid anhydrides;hydrolase activity, acting on acid anhydrides, in phosphorus-containing anhydrides;nucleic acid binding;nucleoside-triphosphatase activity;nucleotide binding;protein binding;purine…	cell part;cytoplasmic microtubule;cytoplasmic part;cytoskeletal part;extracellular membrane-bounded organelle;extracellular organelle;extracellular region part;extracellular vesicular exosome;intracellular organelle part;intracellular part;macromolecular complex;membrane-bounded organelle;membrane-bounded vesicle;microtubule;organelle;organelle part;protein complex;vesicle	Gap junction;Pathogenic Escherichia coli infection;Phagosome	Tubulin;Tubulin_C	27	27	0	66.1	66.1	0	50.151	323.31	120080000000	32772000000	87305000000	3.24129	1.17462	2.32698	3.06378	2.26423	1.27043	1.39014	0.385154	P68363;P68363-2;C9JDS9	P68363;P68363-2	Tubulin alpha-1B chain	TUBA1B
1.64182	1.66626	1.59713	2.53911	2.44684	2.01906	1.23192	1.65764	1.65411	0.52296	1.1973	NaN	+	+			binding of sperm to zona pellucida;cell recognition;cell-cell recognition;cellular component assembly;cellular component assembly at cellular level;cellular component organization;cellular component organization at cellular level;cellular component organization or biogenesis;cellular component organization or biogenesis at cellular level;cellular macromolecular complex assembly;cellular macromole…	adenyl nucleotide binding;adenyl ribonucleotide binding;ATP binding;binding;enzyme binding;nucleotide binding;protein binding;purine nucleotide binding;purine ribonucleoside triphosphate binding;purine ribonucleotide binding;ribonucleotide binding;ubiquitin protein ligase binding;unfolded protein binding	cell body;cell part;chaperonin-containing T-complex;cytoplasm;cytoplasmic part;cytoskeletal part;cytosol;cytosolic part;extracellular membrane-bounded organelle;extracellular organelle;extracellular region part;extracellular vesicular exosome;intracellular organelle part;intracellular part;macromolecular complex;membrane-bounded organelle;membrane-bounded vesicle;microtubule;organelle;organelle p…		Cpn60_TCP1	25	25	25	68.6	68.6	68.6	57.488	323.31	5805500000	2224300000	3581300000	3.75994	1.53507	2.29256	2.235	2.00727	1.41456	0.575471	0.76013	P78371;P78371-2;F5GWF6;F8VQ14	P78371;P78371-2;F5GWF6;F8VQ14	T-complex protein 1 subunit beta	CCT2
1.84756	1.68966	1.45196	0.941257	0.866868	0.82985	3.64674	3.52745	3.59395	0.517528	0.933119	0.715454		+	+		biological regulation;biosynthetic process;carbohydrate metabolic process;carbohydrate transport;cell cycle;cell cycle process;cell surface receptor linked signaling pathway;cellular biosynthetic process;cellular component disassembly;cellular component disassembly at cellular level;cellular component organization;cellular component organization at cellular level;cellular component organization o…	binding;cytoskeletal protein binding;microtubule binding;nucleic acid binding;protein binding;RNA binding;tubulin binding	cell part;cytoplasm;cytoskeleton;envelope;intracellular membrane-bounded organelle;intracellular non-membrane-bounded organelle;intracellular organelle;intracellular organelle part;intracellular part;macromolecular complex;membrane;membrane part;membrane-bounded organelle;non-membrane-bounded organelle;nuclear envelope;nuclear membrane;nuclear outer membrane;nuclear part;nuclear pore;nucleolus;nu…	RNA transport	WD40	15	15	15	56.2	56.2	56.2	40.968	236.95	5602200000	1015300000	4586900000	2.27029	1.56306	2.75395	0.779325	4.0096	3.48938	1.45261	0.622034	P78406;E9PQ57;E9PPG9;B0QZ36;B0QZ37	P78406;E9PQ57;E9PPG9	mRNA export factor	RAE1
2.08896	1.77341	2.08678	2.8267	2.77049	2.80484	1.32406	1.31237	1.36362	NaN	1.24367	1.18085	+	+	+		anatomical structure development;anatomical structure formation involved in morphogenesis;anatomical structure homeostasis;anterior/posterior pattern specification;B cell lineage commitment;biological regulation;brain development;cell activation;cell death;cell differentiation;cell fate commitment;cellular component organization;cellular component organization at cellular level;cellular component…	adenyl nucleotide binding;adenyl ribonucleotide binding;ATP binding;binding;catalytic activity;DNA binding;DNA-dependent protein kinase activity;kinase activity;nucleic acid binding;nucleotide binding;phosphotransferase activity, alcohol group as acceptor;protein binding;protein kinase activity;protein serine/threonine kinase activity;purine nucleotide binding;purine ribonucleoside triphosphate b…	cell part;cytoplasmic part;cytosol;DNA-dependent protein kinase-DNA ligase 4 complex;intracellular non-membrane-bounded organelle;intracellular organelle;intracellular organelle part;intracellular part;macromolecular complex;membrane;nonhomologous end joining complex;non-membrane-bounded organelle;nuclear part;nucleolus;nucleoplasm;nucleoplasm part;organelle;organelle part;protein complex;transcr…	Cell cycle;Non-homologous end-joining	FAT;FATC;NUC194;PI3_PI4_kinase	128	128	128	35.2	35.2	35.2	469.08	323.31	18304000000	6277500000	12026000000	2.51082	1.88305	4.43544	2.70068	3.80132	1.23335	1.74537	1.11226	P78527;P78527-2;F5GX40;H0YG84	P78527;P78527-2	DNA-dependent protein kinase catalytic subunit	PRKDC
3.20328	2.87297	3.23037	5.28021	5.00347	5.18805	2.48841	2.51101	2.50909	1.91449	2.6085	1.9437	+	+	+		anion transport;cellular metabolic process;cellular process;establishment of localization;generation of precursor metabolites and energy;inorganic anion transport;ion transmembrane transport;ion transport;metabolic process;phosphate ion transmembrane transport;phosphate ion transport;transmembrane transport;transport	active transmembrane transporter activity;anion transmembrane transporter activity;binding;inorganic anion transmembrane transporter activity;ion transmembrane transporter activity;phosphate ion carrier activity;phosphate ion transmembrane transporter activity;protein binding;protein complex binding;secondary active transmembrane transporter activity;substrate-specific transmembrane transporter a…	cell part;cytoplasmic part;extracellular membrane-bounded organelle;extracellular organelle;extracellular region part;extracellular vesicular exosome;integral to membrane;integral to plasma membrane;intracellular membrane-bounded organelle;intracellular organelle;intracellular organelle part;intracellular part;intrinsic to membrane;intrinsic to plasma membrane;membrane;membrane part;membrane-boun…		Mito_carr	14	14	14	40.4	40.4	40.4	39.958	92.953	14641000000	1649600000	12991000000	2.8353	3.00221	3.58716	5.05724	5.0427	2.40284	1.92307	2.05556	Q00325-2;Q00325;F8VVM2;F8VWQ0;F8VZL5;F8VWR4	Q00325-2;Q00325;F8VVM2	Phosphate carrier protein, mitochondrial	SLC25A3
NaN	3.15067	3.43256	NaN	3.78492	NaN	NaN	NaN	3.16113	NaN	NaN	NaN					amine metabolic process;amine transport;amino acid transmembrane transport;amino acid transport;anatomical structure development;aromatic amino acid transport;biological regulation;blood coagulation;branched-chain aliphatic amino acid transport;carboxylic acid metabolic process;carboxylic acid transport;cell differentiation;cell migration;cell motility;cellular amine metabolic process;cellular am…	active transmembrane transporter activity;amine transmembrane transporter activity;amino acid transmembrane transporter activity;antigen binding;antiporter activity;aromatic amino acid transmembrane transporter activity;binding;carboxylic acid transmembrane transporter activity;L-amino acid transmembrane transporter activity;L-leucine transmembrane transporter activity;L-phenylalanine transmembra…	apical plasma membrane;cell part;cytoplasm;cytoplasmic part;cytosol;extracellular membrane-bounded organelle;extracellular organelle;extracellular region part;extracellular vesicular exosome;integral to membrane;integral to plasma membrane;intracellular membrane-bounded organelle;intracellular non-membrane-bounded organelle;intracellular organelle;intracellular organelle part;intracellular part;i…		AA_permease_2	3	3	3	7.7	7.7	7.7	55.01	5.6421	483970000	71001000	412970000	1.55137	3.19162	0	3.68492	0	3.06113	0	NaN	Q01650;H0YJ95;A0A0C4DGL4;G3V4Z6;Q9UM01;Q92536	Q01650	Large neutral amino acids transporter small subunit 1	SLC7A5
5.9306	4.86468	5.16716	NaN	0.724476	NaN	0.923644	1.35004	1.02326	NaN	NaN	NaN	+				acylglycerol metabolic process;anatomical structure development;anatomical structure formation involved in morphogenesis;angiogenesis;biological regulation;blood coagulation;body fluid secretion;calcium ion homeostasis;calcium ion transport;cation homeostasis;cation transport;caveola assembly;caveolin-mediated endocytosis;cell communication;cell differentiation;cell migration;cell motility;cell s…	binding;channel inhibitor activity;channel regulator activity;cholesterol binding;enzyme activator activity;enzyme binding;enzyme regulator activity;identical protein binding;inward rectifier potassium channel inhibitor activity;ion channel binding;ion channel inhibitor activity;kinase binding;lipid binding;nitric-oxide synthase binding;patched binding;peptidase activator activity;peptidase regul…	acrosomal membrane;adherens junction;anchoring junction;apical plasma membrane;basolateral plasma membrane;caveola;cell cortex;cell junction;cell part;cell projection;cell-substrate adherens junction;cell-substrate junction;cilium;cytoplasmic part;cytoplasmic vesicle;cytoplasmic vesicle membrane;cytoplasmic vesicle part;early endosome membrane;endocytic vesicle membrane;endoplasmic reticulum;endo…	Bacterial invasion of epithelial cells;Endocytosis;Focal adhesion;Viral myocarditis	Caveolin	10	10	10	68	68	68	20.471	76.306	5402400000	621590000	4780800000	2.43535	5.22081	0	0.624476	1.79006	0.998981	0	NaN	Q03135;E9PCT5;C9JKI3;Q03135-2;P56539	Q03135;E9PCT5;C9JKI3;Q03135-2	Caveolin-1;Caveolin	CAV1
3.0171	2.92372	2.65246	2.85002	2.92797	2.74487	2.92081	2.73812	2.75086	1.7707	1.9268	1.9087	+	+	+		anatomical structure development;anatomical structure homeostasis;biological regulation;biosynthetic process;catabolic process;cell killing;cell proliferation;cellular biosynthetic process;cellular catabolic process;cellular macromolecule metabolic process;cellular metabolic process;cellular nitrogen compound metabolic process;cellular process;cellular response to chemical stimulus;cellular respo…	antioxidant activity;binding;catalytic activity;cation binding;heme binding;ion binding;iron ion binding;metal ion binding;oxidoreductase activity;oxidoreductase activity, acting on paired donors, with incorporation or reduction of molecular oxygen;oxidoreductase activity, acting on peroxide as acceptor;peroxidase activity;peroxiredoxin activity;tetrapyrrole binding;thioredoxin peroxidase activit…	cell part;chromatin;chromosomal part;cytoplasm;cytoplasmic membrane-bounded vesicle;cytoplasmic part;cytoplasmic vesicle;cytosol;euchromatin;extracellular membrane-bounded organelle;extracellular organelle;extracellular region part;extracellular space;extracellular vesicular exosome;intracellular membrane-bounded organelle;intracellular non-membrane-bounded organelle;intracellular organelle;intra…	Peroxisome	1-cysPrx_C;AhpC-TSA	21	21	17	79.4	79.4	64.3	22.11	323.31	198800000000	35667000000	163140000000	2.80653	2.76443	3.42667	2.74095	3.32405	2.70326	3.11027	1.76873	Q06830;A0A0A0MSI0;A0A0A0MRQ5	Q06830;A0A0A0MSI0	Peroxiredoxin-1	PRDX1
2.349	2.40149	2.95957	2.11989	2.43672	2.71086	2.10148	1.80999	1.72788	7.39566	5.7498	7.50287		+	+		activation of immune response;apoptosis;biological regulation;biosynthetic process;blood coagulation;blood coagulation, intrinsic pathway;cell death;cellular biosynthetic process;cellular component assembly;cellular component assembly at cellular level;cellular component organization;cellular component organization at cellular level;cellular component organization or biogenesis;cellular component…	adrenergic receptor binding;binding;carbohydrate binding;complement binding;complement component C1q binding;glycosaminoglycan binding;G-protein-coupled receptor binding;hyaluronic acid binding;kininogen binding;mRNA binding;nucleic acid binding;opsonin binding;pattern binding;polysaccharide binding;protein binding;protein binding transcription factor activity;receptor binding;RNA binding;transcr…	cell part;cell surface;cytoplasm;cytoplasmic part;cytosol;extracellular region part;extracellular space;intracellular membrane-bounded organelle;intracellular non-membrane-bounded organelle;intracellular organelle;intracellular organelle lumen;intracellular organelle part;intracellular part;membrane;membrane-bounded organelle;membrane-enclosed lumen;mitochondrial matrix;mitochondrial part;mitocho…		MAM33	9	9	9	45.7	45.7	45.7	31.362	173.33	7756300000	707360000	7048900000	2.20777	2.47002	2.27071	2.32249	2.39448	1.77978	2.15967	6.78278	Q07021;I3L3Q7;I3L3B0	Q07021;I3L3Q7;I3L3B0	Complement component 1 Q subcomponent-binding protein, mitochondrial	C1QBP
1.71668	1.86849	1.90149	1.5589	1.73505	1.46978	1.53426	1.44483	1.36955	0.636451	0.733962	0.413161	+	+	+				cell part;cytoplasmic part;cytoskeleton;endoplasmic reticulum;endoplasmic reticulum membrane;endoplasmic reticulum part;extracellular membrane-bounded organelle;extracellular organelle;extracellular region part;extracellular vesicular exosome;integral to membrane;intracellular membrane-bounded organelle;intracellular non-membrane-bounded organelle;intracellular organelle;intracellular organelle p…	Protein processing in endoplasmic reticulum		28	28	28	63.5	63.5	63.5	66.022	323.31	10282000000	3487300000	6794600000	2.96592	1.72889	2.56346	1.48791	2.90585	1.34955	1.45662	0.494524	Q07065;H3BUW6;H3BN64;H3BRM1;H3BRF9;Q96K21-4;Q96K21-3;Q96K21-2;Q96K21	Q07065	Cytoskeleton-associated protein 4	CKAP4
1.75736	1.45639	1.29936	0.290306	0.564622	0.337311	NaN	NaN	NaN	-0.251195	0.024036	-0.22334					biological regulation;cell surface receptor linked signaling pathway;cellular macromolecule metabolic process;cellular metabolic process;cellular nitrogen compound metabolic process;cellular process;cellular response to stimulus;cGMP-mediated signaling;cyclic-nucleotide-mediated signaling;G-protein coupled receptor protein signaling pathway;G-protein signaling, coupled to cGMP nucleotide second m…	binding;molecular transducer activity;nucleic acid binding;receptor signaling protein activity;RNA binding;signal transducer activity;snoRNA binding	cell part;intracellular membrane-bounded organelle;intracellular non-membrane-bounded organelle;intracellular organelle;intracellular organelle part;intracellular part;macromolecular complex;membrane-bounded organelle;non-membrane-bounded organelle;nuclear part;nucleolar part;nucleolus;nucleus;organelle;organelle part;preribosome;protein complex;Pwp2p-containing subcomplex of 90S preribosome;ribo…	Ribosome biogenesis in eukaryotes	Utp13;WD40	29	29	29	50.5	50.5	50.5	89.034	224.14	3901700000	2058000000	1843600000	2.04425	1.40437	1.14024	0.297413	0	NaN	0.984623	-0.250166	Q12788;J3KNP2;A0A087WYP7;H3BN88	Q12788;J3KNP2	Transducin beta-like protein 3	TBL3
1.30912	1.22039	1.29889	NaN	0.598556	0.205017	NaN	0.552475	-1.22024	-0.873027	-0.749912	-0.990653	+				biological regulation;biosynthetic process;cellular biosynthetic process;cellular component organization;cellular component organization at cellular level;cellular component organization or biogenesis;cellular component organization or biogenesis at cellular level;cellular macromolecule biosynthetic process;cellular macromolecule metabolic process;cellular metabolic process;cellular nitrogen comp…	binding;enzyme binding;identical protein binding;protein binding;protein domain specific binding	cell part;centromeric heterochromatin;chromatin;chromosomal part;chromosome, centromeric region;condensed chromosome, centromeric region;cytoskeletal part;envelope;euchromatin;heterochromatin;intracellular membrane-bounded organelle;intracellular non-membrane-bounded organelle;intracellular organelle;intracellular organelle part;intracellular part;membrane;membrane-bounded organelle;non-membrane-…		Chromo;Chromo_shadow	8	6	6	52.5	37.2	37.2	20.811	137.72	3813600000	2088300000	1725200000	3.24613	1.17613	0.434349	0.301786	0.148622	-0.433885	2.29394	-0.971197	Q13185;S4R2Y4;C9JMM0;B8ZZ43	Q13185	Chromobox protein homolog 3	CBX3
1.1615	1.5512	0.814345	5.69811	5.19893	5.33496	1.73859	1.80021	1.66812	1.85711	0.97519	NaN		+	+		activation of immune response;activation of innate immune response;anaphase-promoting complex-dependent proteasomal ubiquitin-dependent protein catabolic process;antigen processing and presentation;antigen processing and presentation of exogenous antigen;antigen processing and presentation of exogenous peptide antigen;antigen processing and presentation of exogenous peptide antigen via MHC class …	enzyme regulator activity	cell part;cytoplasmic part;cytosol;extracellular membrane-bounded organelle;extracellular organelle;extracellular region part;extracellular vesicular exosome;intracellular organelle part;intracellular part;macromolecular complex;membrane;membrane-bounded organelle;membrane-bounded vesicle;nuclear part;nucleoplasm;organelle;organelle part;proteasome accessory complex;proteasome complex;proteasome …	Proteasome	PC_rep	38	38	38	54.7	54.7	54.7	100.2	322.61	10529000000	853490000	9675800000	1.43194	1.07568	3.1045	5.31067	3.26454	1.63564	0.686537	1.31615	Q13200;Q13200-3;Q13200-2;H7C1H2;H7C2Q3;C9JPC0	Q13200;Q13200-3;Q13200-2	26S proteasome non-ATPase regulatory subunit 2	PSMD2
1.89037	NaN	2.15312	4.892	4.337	4.59938	2.1413	1.79764	2.05547	NaN	NaN	NaN		+	+		cellular component assembly;cellular component assembly at cellular level;cellular component organization;cellular component organization at cellular level;cellular component organization or biogenesis;cellular component organization or biogenesis at cellular level;cellular macromolecular complex assembly;cellular macromolecular complex subunit organization;cellular macromolecule metabolic proces…	binding;catalytic activity;GTP binding;GTPase activity;guanyl nucleotide binding;guanyl ribonucleotide binding;hydrolase activity;hydrolase activity, acting on acid anhydrides;hydrolase activity, acting on acid anhydrides, in phosphorus-containing anhydrides;nucleoside-triphosphatase activity;nucleotide binding;purine nucleotide binding;purine ribonucleoside triphosphate binding;purine ribonucleo…	cell part;cytoplasm;cytoskeletal part;intracellular membrane-bounded organelle;intracellular organelle;intracellular organelle part;intracellular part;macromolecular complex;membrane-bounded organelle;microtubule;nucleus;organelle;organelle part;protein complex	Gap junction;Pathogenic Escherichia coli infection;Phagosome	Tubulin;Tubulin_C	25	3	2	59.8	7.3	5.3	49.959	14.102	1319100000	190800000	1128300000	1.36197	1.92175	2.89923	4.50946	2.53065	1.89814	0	NaN	Q13748;Q13748-2;Q6PEY2;V9GZ17;C9K0S6;F8VXZ7;F8W0F6	Q13748;Q13748-2;Q6PEY2	Tubulin alpha-3C/D chain;Tubulin alpha-3E chain	TUBA3C;TUBA3E
0.929337	1.29178	1.12141	1.41343	0.761115	NaN	0.530271	0.918234	0.921893	0.400647	0.733788	NaN					anatomical structure development;biological adhesion;brown fat cell differentiation;cell adhesion;cell differentiation;cell junction assembly;cell junction organization;cell-substrate junction assembly;cellular component assembly;cellular component assembly at cellular level;cellular component disassembly;cellular component disassembly at cellular level;cellular component organization;cellular co…	structural molecule activity	extracellular matrix part;extracellular region;extracellular region part;laminin complex;laminin-5 complex;macromolecular complex;protein complex	Amoebiasis;ECM-receptor interaction;Focal adhesion;Pathways in cancer;Small cell lung cancer;Toxoplasmosis	Laminin_EGF;Laminin_N	11	11	11	12	12	12	129.57	77.377	919870000	428100000	491770000	1.97928	1.01418	0.692228	0.987273	1.47279	0.690132	0.6615	0.467218	Q13751;X1WI29	Q13751	Laminin subunit beta-3	LAMB3
1.33337	1.43883	1.19617	-0.00670966	0.0280033	0.0962619	NaN	NaN	NaN	-0.159025	0.0210533	-0.107943	+				cellular macromolecule metabolic process;cellular metabolic process;cellular nitrogen compound metabolic process;cellular process;macromolecule metabolic process;maturation of 5.8S rRNA;maturation of 5.8S rRNA from tricistronic rRNA transcript (SSU-rRNA, 5.8S rRNA, LSU-rRNA);maturation of SSU-rRNA;maturation of SSU-rRNA from tricistronic rRNA transcript (SSU-rRNA, 5.8S rRNA, LSU-rRNA);metabolic p…	binding;protein binding;transcription factor binding	cell part;cytoplasmic part;cytosol;intracellular membrane-bounded organelle;intracellular non-membrane-bounded organelle;intracellular organelle;intracellular organelle part;intracellular part;macromolecular complex;membrane-bounded organelle;non-membrane-bounded organelle;nuclear part;nucleolus;nucleus;organelle;organelle part;preribosome;ribonucleoprotein complex;small-subunit processome		S1;Suf	57	57	57	37.4	37.4	37.4	208.7	308.19	8409100000	4326800000	4082400000	2.48356	1.22279	0.739777	-0.0608148	0	NaN	1.11441	-0.181972	Q14690;S4R3Q4	Q14690	Protein RRP5 homolog	PDCD11
2.56162	2.86726	2.22897	3.04701	3.29087	3.7277	1.49436	1.71611	1.78333	NaN	1.09552	NaN		+	+		alcohol metabolic process;biosynthetic process;cholesterol biosynthetic process;cholesterol metabolic process;lipid biosynthetic process;lipid metabolic process;metabolic process;primary metabolic process;small molecule metabolic process;steroid biosynthetic process;steroid metabolic process;sterol biosynthetic process;sterol metabolic process	binding;catalytic activity;chromo shadow domain binding;DNA binding;lamin binding;nucleic acid binding;oxidoreductase activity;oxidoreductase activity, acting on the CH-CH group of donors;oxidoreductase activity, acting on the CH-CH group of donors, NAD or NADP as acceptor;protein binding;protein domain specific binding	cell part;envelope;integral to membrane;integral to nuclear inner membrane;integral to organelle membrane;intracellular organelle part;intracellular part;intrinsic to membrane;intrinsic to nuclear inner membrane;intrinsic to organelle membrane;membrane;membrane part;nuclear envelope;nuclear membrane;nuclear membrane part;nuclear part;organelle envelope;organelle membrane;organelle part		ERG4_ERG24;LBR_tudor	10	10	10	17.6	17.6	17.6	70.702	50.551	2119900000	582850000	1537100000	2.2518	2.45262	2.42939	3.25519	2.50877	1.5646	0	0.995519	Q14739;C9JXK0;C9JES9	Q14739;C9JXK0	Lamin-B receptor	LBR
0.856707	1.31777	1.28155	0.772392	0.648005	0.736129	NaN	NaN	-2.64494	-1.51668	-1.71421	-1.44261		+			cell cycle;cell cycle phase;cell cycle process;cellular component organization;cellular component organization at cellular level;cellular component organization or biogenesis;cellular component organization or biogenesis at cellular level;cellular macromolecule metabolic process;cellular metabolic process;cellular nitrogen compound metabolic process;cellular process;macromolecule metabolic proces…	adenyl nucleotide binding;adenyl ribonucleotide binding;ATP binding;binding;GTP binding;guanyl nucleotide binding;guanyl ribonucleotide binding;nucleotide binding;purine nucleotide binding;purine ribonucleoside triphosphate binding;purine ribonucleotide binding;ribonucleotide binding	Cajal body;cell part;cytoplasm;intracellular non-membrane-bounded organelle;intracellular organelle;intracellular organelle part;intracellular part;non-membrane-bounded organelle;nuclear body;nuclear part;nucleolus;nucleoplasm;nucleoplasm part;organelle;organelle part		SRP40_C	23	23	2	27.8	27.8	4.5	74.746	209.38	17736000000	9810300000	7925900000	1.71606	1.05201	2.45064	0.618842	0	-2.74494	2.62305	-1.65783	Q14978-2;A0A0A0MRM9;Q14978;S4R349;S4R402;S4R3C2	Q14978-2;A0A0A0MRM9;Q14978	Nucleolar and coiled-body phosphoprotein 1	NOLC1
1.47212	1.21804	1.39654	0.372841	0.333996	0.364685	0.0103502	NaN	-1.27453	-0.424823	-0.552558	-0.463967	+	+			cell cycle;cell cycle phase;cell cycle process;cell differentiation;cell division;cellular component organization;cellular component organization at cellular level;cellular component organization or biogenesis;cellular component organization or biogenesis at cellular level;cellular developmental process;cellular process;cytoskeleton organization;developmental process;epithelial cell differentiati…	structural molecule activity	apical part of cell;cell body;cell part;cell projection;chromosome;cytoplasm;cytoplasmic part;cytoskeletal part;cytosol;dendrite;extracellular membrane-bounded organelle;extracellular organelle;extracellular region part;extracellular vesicular exosome;Golgi apparatus part;Golgi membrane;intracellular membrane-bounded organelle;intracellular non-membrane-bounded organelle;intracellular organelle;i…			59	59	59	37.3	37.3	37.3	236.51	323.31	7585600000	4069400000	3516200000	2.45068	1.26223	2.67618	0.257174	0.338626	-0.73209	2.37567	-0.580449	Q14980-2;Q14980;A0A087WY61;Q14980-4;Q14980-3;H0YFY6;Q14980-5;F5H4J1;F5H6Y5;K4DIE0;F5H2F3;F5H3L6;F5H0Z7;F5H763;F5H1L0;F5GZW1;F8W6T3;F5GWK2;F5H073;F5H068	Q14980-2;Q14980;A0A087WY61;Q14980-4;Q14980-3	Nuclear mitotic apparatus protein 1	NUMA1
0.967021	1.36115	1.20245	1.3883	1.35411	1.2489	2.42841	2.52614	2.37993	0.397803	0.427713	0.27274		+	+		cellular macromolecule metabolic process;cellular metabolic process;cellular nitrogen compound metabolic process;cellular process;gene expression;macromolecule metabolic process;metabolic process;mRNA metabolic process;mRNA processing;nitrogen compound metabolic process;nuclear mRNA splicing, via spliceosome;nucleic acid metabolic process;nucleobase-containing compound metabolic process;primary m…	binding;DNA binding;nucleic acid binding;RNA binding;single-stranded DNA binding;structure-specific DNA binding	cell part;cytoplasm;extracellular membrane-bounded organelle;extracellular organelle;extracellular region part;extracellular vesicular exosome;intracellular membrane-bounded organelle;intracellular organelle;intracellular organelle part;intracellular part;macromolecular complex;membrane;membrane-bounded organelle;membrane-bounded vesicle;nuclear part;nucleoplasm;organelle;organelle part;ribonucle…	Spliceosome	KH_1	15	15	11	74.2	74.2	61	37.497	293.67	28095000000	8604200000	19491000000	1.95407	1.07687	2.93548	1.23044	3.4735	2.34483	1.51745	0.266085	Q15365;F8VTZ0;H3BSP4;C9K0A2;F8WC71;C9IZV9;C9J7A9;C9JSA6;C9J5V4;C9JTY5;C9JZY3;C9J0A4;F6TJN8;P57723-2;P57723	Q15365	Poly(rC)-binding protein 1	PCBP1
3.97389	4.54449	3.20916	2.9498	2.79539	2.425	4.03378	3.82038	4.25882	NaN	NaN	NaN		+	+		amine transport;amino acid transport;carboxylic acid transport;cellular process;establishment of localization;extracellular amino acid transport;extracellular transport;glutamine transport;ion transport;neutral amino acid transport;nitrogen compound transport;organic acid transport;organic substance transport;transmembrane transport;transport	active transmembrane transporter activity;amine transmembrane transporter activity;amino acid transmembrane transporter activity;anion transmembrane transporter activity;anion:cation symporter activity;carboxylic acid transmembrane transporter activity;cation transmembrane transporter activity;dicarboxylic acid transmembrane transporter activity;inorganic cation transmembrane transporter activity…	cell part;cytoplasmic membrane-bounded vesicle;cytoplasmic part;cytoplasmic vesicle;extracellular membrane-bounded organelle;extracellular organelle;extracellular region part;extracellular vesicular exosome;Golgi apparatus;integral to membrane;integral to plasma membrane;intracellular membrane-bounded organelle;intracellular organelle;intracellular part;intrinsic to membrane;intrinsic to plasma m…	Protein digestion and absorption	SDF	8	8	8	18.9	18.9	18.9	56.598	103.62	1590200000	179940000	1410200000	1.99327	3.80918	2.45537	2.6234	2.98641	3.93766	0	NaN	Q15758;M0QXM4;Q15758-3;Q15758-2;M0QX44	Q15758;M0QXM4;Q15758-3;Q15758-2	Neutral amino acid transporter B(0);Amino acid transporter	SLC1A5
7.88215	7.88783	8.01117	5.93732	5.4722	6.47224	5.90987	5.96834	5.8531	4.88557	4.7461	-0.640839	+	+	+		cell differentiation;cellular developmental process;cellular process;developmental process;neuron differentiation		cell part;cytoplasmic part;endoplasmic reticulum membrane;endoplasmic reticulum part;integral to endoplasmic reticulum membrane;integral to membrane;integral to organelle membrane;intracellular organelle part;intracellular part;intrinsic to endoplasmic reticulum membrane;intrinsic to membrane;intrinsic to organelle membrane;membrane;membrane part;organelle membrane;organelle part		Reticulon	66	66	5	72.4	72.4	10.6	83.617	323.31	2174200000000	23735000000	2150500000000	4.53882	7.82705	2.6159	5.86059	4.48433	5.81044	0.598052	2.89694	Q16799	Q16799	Reticulon-1	RTN1
1.26736	1.19093	1.37301	2.88706	1.17505	3.48052	1.00798	NaN	1.05575	NaN	NaN	NaN	+				cellular component assembly;cellular component assembly at cellular level;cellular component organization;cellular component organization at cellular level;cellular component organization or biogenesis;cellular component organization or biogenesis at cellular level;cellular macromolecular complex assembly;cellular macromolecular complex subunit organization;cellular process;cellular protein compl…	binding;catalytic activity;GTP binding;GTPase activity;guanyl nucleotide binding;guanyl ribonucleotide binding;hydrolase activity;hydrolase activity, acting on acid anhydrides;hydrolase activity, acting on acid anhydrides, in phosphorus-containing anhydrides;nucleoside-triphosphatase activity;nucleotide binding;purine nucleotide binding;purine ribonucleoside triphosphate binding;purine ribonucleo…	cell part;cytoplasm;cytoskeletal part;extracellular membrane-bounded organelle;extracellular organelle;extracellular region part;extracellular vesicular exosome;intracellular organelle part;intracellular part;macromolecular complex;membrane-bounded organelle;membrane-bounded vesicle;microtubule;organelle;organelle part;protein complex;vesicle	Gap junction;Pathogenic Escherichia coli infection;Phagosome	Tubulin;Tubulin_C	11	2	2	24.5	7.4	7.4	49.775	236.22	3821200000	971660000	2849500000	2.69789	1.1771	1.13616	2.41421	1.78748	0.931868	0	NaN	Q3ZCM7;A0A075B736;Q5SQY0	Q3ZCM7;A0A075B736;Q5SQY0	Tubulin beta-8 chain	TUBB8
3.43669	2.92924	2.97915	NaN	3.51501	2.76931	NaN	2.57352	2.57175	-0.378026	NaN	NaN	+		+				cell part;cytoplasmic part;endosome;intracellular membrane-bounded organelle;intracellular organelle;intracellular organelle part;intracellular part;membrane;membrane-bounded organelle;mitochondrial inner membrane;mitochondrial membrane;mitochondrial part;organelle;organelle inner membrane;organelle membrane;organelle part		OCIA	8	8	8	53.9	53.9	53.9	16.953	66.296	1597800000	197570000	1400200000	2.54422	3.01503	1.10993	3.04216	3.64227	2.47263	0	-0.478026	Q56VL3;D6RD77;J3KPI9;Q56VL3-2	Q56VL3	OCIA domain-containing protein 2	OCIAD2
1.5675	1.48882	1.37601	0.270589	0.394404	0.3639	NaN	NaN	-1.26649	0.0233263	-0.121424	-0.355664	+					binding;DNA binding;nucleic acid binding	cell part;chromosomal part;intracellular membrane-bounded organelle;intracellular organelle;intracellular organelle part;intracellular part;macromolecular complex;membrane-bounded organelle;nucleosome;nucleus;organelle;organelle part;protein-DNA complex		Histone	7	1	1	27.9	8.1	8.1	15.43	4.389	13610000000	7119300000	6490700000	2.78954	1.37744	1.64396	0.242964	0	-1.36649	0.821982	-0.251254	Q5TEC6	Q5TEC6	Histone H3	HIST2H3PS2
1.10481	1.06578	1.28877	0.353662	0.422986	0.465295	NaN	NaN	NaN	-0.682418	-0.777888	-0.279371	+				biological regulation;biosynthetic process;cellular biosynthetic process;cellular macromolecule biosynthetic process;cellular macromolecule metabolic process;cellular metabolic process;cellular nitrogen compound metabolic process;cellular process;macromolecule biosynthetic process;macromolecule metabolic process;metabolic process;negative regulation of biological process;negative regulation of ce…	adenyl nucleotide binding;adenyl ribonucleotide binding;ATP binding;ATPase activity;binding;catalytic activity;chromatin binding;histone binding;hydrolase activity;hydrolase activity, acting on acid anhydrides;hydrolase activity, acting on acid anhydrides, in phosphorus-containing anhydrides;nucleoside-triphosphatase activity;nucleotide binding;protein binding;purine nucleotide binding;purine rib…	cell part;extracellular membrane-bounded organelle;extracellular organelle;extracellular region part;extracellular vesicular exosome;intracellular organelle part;intracellular part;membrane-bounded organelle;membrane-bounded vesicle;nuclear part;nucleoplasm;organelle;organelle part;vesicle		AAA;Bromodomain	33	33	33	27.5	27.5	27.5	158.55	204.29	3855000000	1887800000	1967100000	2.3731	1.05312	1.97593	0.313981	0	NaN	1.32828	-0.679892	Q6PL18;A0A0B4J211;Q6PL18-2;Q9ULI0-2;Q9ULI0	Q6PL18	ATPase family AAA domain-containing protein 2	ATAD2
1.32734	1.36972	1.27453	0.220206	0.288418	0.0473989	-0.337284	-0.435417	-1.3642	-0.504837	-0.438268	-0.462555	+				biological regulation;blood coagulation;cellular component assembly;cellular component assembly at cellular level;cellular component organization;cellular component organization at cellular level;cellular component organization or biogenesis;cellular component organization or biogenesis at cellular level;cellular macromolecular complex assembly;cellular macromolecular complex subunit organization…	binding;DNA binding;histone binding;nucleic acid binding;protein binding	cell part;chromosomal part;extracellular membrane-bounded organelle;extracellular organelle;extracellular region;extracellular region part;extracellular vesicular exosome;intracellular membrane-bounded organelle;intracellular organelle;intracellular organelle part;intracellular part;macromolecular complex;membrane-bounded organelle;membrane-bounded vesicle;nuclear part;nucleoplasm;nucleosome;nucl…	Systemic lupus erythematosus	Histone	11	11	1	55.9	55.9	23.5	15.388	195.44	359760000000	187730000000	172020000000	3.29608	1.22386	0.448286	0.0853409	0.882465	-0.8123	2.93249	-0.568553	Q71DI3	Q71DI3	Histone H3.2	HIST2H3A
2.5476	2.44961	2.1332	3.49863	3.7352	3.6893	1.64727	1.59741	1.57986	1.18922	1.15147	NaN	+	+	+		biological regulation;cellular component movement;cellular process;cellular response to stimulus;intracellular signal transduction;microtubule-based movement;microtubule-based process;regulation of biological process;regulation of cellular process;response to stimulus;signal transduction;small GTPase mediated signal transduction		cell part;cytoplasmic part;endoplasmic reticulum;endoplasmic reticulum membrane;endoplasmic reticulum part;integral to membrane;integral to plasma membrane;intracellular membrane-bounded organelle;intracellular organelle;intracellular organelle part;intracellular part;intrinsic to membrane;intrinsic to plasma membrane;membrane;membrane part;membrane-bounded organelle;organelle;organelle membrane;…			54	54	54	49.7	49.7	49.7	156.27	323.31	8471600000	1618700000	6852900000	2.5225	2.2768	3.37873	3.54104	3.7467	1.50818	1.94975	1.07035	Q86UP2;Q86UP2-2;Q86UP2-4;Q86UP2-3;G3V4Y7;B7Z6P3;G3V5P0;G3V5G2;H0YJZ8;H0YJV5;H0YJP2;G8JLP4;Q9Y4F3-3;Q9Y4F3-4;Q9Y4F3-5;Q9Y4F3	Q86UP2;Q86UP2-2;Q86UP2-4;Q86UP2-3	Kinectin	KTN1
1.42718	0.910733	1.09545	0.151599	0.267356	0.344715	NaN	NaN	NaN	NaN	-0.0618874	0.203389							cell part;intracellular non-membrane-bounded organelle;intracellular organelle;intracellular organelle part;intracellular part;non-membrane-bounded organelle;nuclear part;nucleolus;nucleoplasm;organelle;organelle part	Ribosome biogenesis in eukaryotes	WD40	16	16	16	23	23	23	94.498	63.373	1031400000	490630000	540750000	1.69272	1.04445	0.956993	0.154557	0	NaN	0.0645808	-0.0292491	Q8IWA0;F8WE20;F8WC81	Q8IWA0	WD repeat-containing protein 75	WDR75
1.17198	1.71936	1.13685	NaN	6.46891	3.6705	NaN	NaN	NaN	NaN	NaN	NaN					carbohydrate metabolic process;cell migration;cell motility;cellular carbohydrate metabolic process;cellular component movement;cellular macromolecule metabolic process;cellular metabolic process;cellular process;cellular protein metabolic process;glycosylation;locomotion;macromolecule glycosylation;macromolecule metabolic process;macromolecule modification;metabolic process;neuron migration;prim…	acetylglucosaminyltransferase activity;catalytic activity;transferase activity;transferase activity, transferring glycosyl groups;transferase activity, transferring hexosyl groups;UDP-glycosyltransferase activity	cell part;cytoplasmic part;endoplasmic reticulum;endoplasmic reticulum membrane;endoplasmic reticulum part;integral to membrane;intracellular membrane-bounded organelle;intracellular organelle;intracellular organelle part;intracellular part;intrinsic to membrane;membrane;membrane part;membrane-bounded organelle;organelle;organelle membrane;organelle part		DUF563	15	15	15	33.8	33.8	33.8	66.615	46.583	1115400000	278500000	836910000	1.65242	1.24273	0.757669	4.9697	0	NaN	0	NaN	Q8NAT1	Q8NAT1	Protein O-linked-mannose beta-1,4-N-acetylglucosaminyltransferase 2	POMGNT2
3.31512	3.34013	3.47418	NaN	1.7458	NaN	1.22836	NaN	1.16279	0.98863	NaN	NaN	+				apoptotic cell clearance;biological regulation;cell redox homeostasis;cellular component organization;cellular component organization or biogenesis;cellular homeostasis;cellular macromolecule metabolic process;cellular membrane organization;cellular metabolic process;cellular process;cellular protein metabolic process;cellular response to stimulus;cellular response to stress;endocytosis;establish…	catalytic activity;intramolecular oxidoreductase activity;intramolecular oxidoreductase activity, interconverting keto- and enol-groups;intramolecular oxidoreductase activity, transposing S-S bonds;isomerase activity;protein disulfide isomerase activity	cell part;cytoplasmic part;endoplasmic reticulum;endoplasmic reticulum lumen;endoplasmic reticulum part;extracellular membrane-bounded organelle;extracellular organelle;extracellular region part;extracellular vesicular exosome;intracellular membrane-bounded organelle;intracellular organelle;intracellular organelle lumen;intracellular organelle part;intracellular part;lysosomal lumen;membrane-boun…	Protein processing in endoplasmic reticulum	Thioredoxin	10	10	10	41.4	41.4	41.4	36.177	74.181	935060000	127920000	807130000	3.64384	3.27648	0	1.6458	1.72024	1.09557	0	0.88863	Q8NBS9-2;Q8NBS9	Q8NBS9-2;Q8NBS9	Thioredoxin domain-containing protein 5	TXNDC5
3.76596	3.58436	3.16168	5.15733	5.54046	5.75822	4.27008	4.38998	4.02919	4.02777	3.78063	4.7476	+	+	+		biological regulation;cellular component organization;cellular component organization or biogenesis;cellular macromolecule metabolic process;cellular membrane organization;cellular metabolic process;cellular process;cellular protein metabolic process;cellular response to heat;cellular response to stimulus;cellular response to stress;chaperone mediated protein folding requiring cofactor;chaperone-…	adenyl nucleotide binding;adenyl ribonucleotide binding;ATP binding;binding;nucleotide binding;purine nucleotide binding;purine ribonucleoside triphosphate binding;purine ribonucleotide binding;ribonucleotide binding	cell part;cytoplasm;cytoplasmic membrane-bounded vesicle lumen;cytoplasmic part;cytoplasmic vesicle part;cytoskeletal part;cytosol;endocytic vesicle lumen;extracellular membrane-bounded organelle;extracellular organelle;extracellular region;extracellular region part;extracellular vesicular exosome;intracellular organelle part;intracellular part;macromolecular complex;membrane-bounded organelle;me…	Protein processing in endoplasmic reticulum	HSP70	52	52	3	70.8	70.8	5.3	92.115	323.31	50843000000	3148000000	47696000000	2.56003	3.404	2.97387	5.38534	3.18096	4.12975	2.30079	4.08533	Q92598-2;Q92598;Q92598-3;R4GN69	Q92598-2;Q92598;Q92598-3	Heat shock protein 105 kDa	HSPH1
2.98517	3.50906	2.91818	NaN	5.01467	4.12052	NaN	2.11177	NaN	NaN	2.10057	NaN	+				amine metabolic process;aminoglycan catabolic process;aminoglycan metabolic process;biological regulation;calcium ion-dependent exocytosis;carbohydrate catabolic process;carbohydrate metabolic process;catabolic process;cation homeostasis;cation transport;cellular cation homeostasis;cellular chemical homeostasis;cellular component assembly;cellular component organization;cellular component organiz…	binding;calcium ion binding;calcium-dependent protein binding;cation binding;channel regulator activity;cytoskeletal protein binding;enzyme binding;enzyme inhibitor activity;enzyme regulator activity;ion binding;kinase binding;kinase inhibitor activity;kinase regulator activity;metal ion binding;microtubule binding;potassium channel regulator activity;protein binding;protein kinase inhibitor acti…	adherens junction;anchoring junction;cell junction;cell part;cell-substrate adherens junction;cell-substrate junction;cytoplasm;cytoplasmic membrane-bounded vesicle;cytoplasmic part;cytoplasmic vesicle;cytoskeleton;cytosol;endoplasmic reticulum;endoplasmic reticulum-Golgi intermediate compartment;extracellular membrane-bounded organelle;extracellular organelle;extracellular region part;extracellu…	Alzheimer's disease;Amyotrophic lateral sclerosis (ALS);Apoptosis;Axon guidance;B cell receptor signaling pathway;Calcium signaling pathway;ko05152;Long-term potentiation;MAPK signaling pathway;Natural killer cell mediated cytotoxicity;Oocyte meiosis;T cell receptor signaling pathway;VEGF signaling pathway;Wnt signaling pathway	EF-hand_1;EF-hand_7	10	10	10	70.8	70.8	70.8	22.456	119.39	1418100000	306330000	1111800000	2.42473	3.03747	1.19726	4.46759	0	2.01177	0	2.00057	Q99653;H0YNG9;H0YKE7;F5GX29;H0YLY7;H0YLX1	Q99653;H0YNG9;H0YKE7;F5GX29;H0YLY7	Calcineurin B homologous protein 1	CHP1
2.38128	2.22916	2.19846	NaN	1.84342	2.02308	2.48034	2.42798	2.3799	1.39342	1.5741	1.46258	+		+		amine catabolic process;amine metabolic process;branched chain family amino acid catabolic process;branched chain family amino acid metabolic process;carboxylic acid catabolic process;carboxylic acid metabolic process;catabolic process;cellular amine metabolic process;cellular amino acid catabolic process;cellular amino acid metabolic process;cellular catabolic process;cellular ketone metabolic p…	3-hydroxy-2-methylbutyryl-CoA dehydrogenase activity;3-hydroxyacyl-CoA dehydrogenase activity;catalytic activity;cholate 7-alpha-dehydrogenase activity;oxidoreductase activity;oxidoreductase activity, acting on CH-OH group of donors;oxidoreductase activity, acting on the CH-OH group of donors, NAD or NADP as acceptor;steroid dehydrogenase activity;steroid dehydrogenase activity, acting on the CH-…	cell part;cytoplasm;cytoplasmic part;endoplasmic reticulum;intracellular membrane-bounded organelle;intracellular organelle;intracellular organelle lumen;intracellular organelle part;intracellular part;membrane;membrane-bounded organelle;membrane-enclosed lumen;mitochondrial inner membrane;mitochondrial matrix;mitochondrial membrane;mitochondrial part;mitochondrion;organelle;organelle inner membr…	Alzheimer's disease;Valine, leucine and isoleucine degradation	adh_short	13	13	13	78.9	78.9	78.9	26.923	202.61	1902500000	418040000	1484500000	3.16876	2.16963	1.50628	1.83325	3.80966	2.32941	2.83608	1.3767	Q99714;Q99714-2;Q5H928	Q99714;Q99714-2;Q5H928	3-hydroxyacyl-CoA dehydrogenase type-2	HSD17B10
6.58037	7.05961	6.92077	0.181293	NaN	NaN	5.30801	5.2958	3.88714	NaN	NaN	NaN	+				anatomical structure development;biological regulation;developmental process;establishment of localization;lipid transport;nervous system development;organic substance transport;regulation of apoptosis;regulation of biological process;regulation of cell death;regulation of cellular process;regulation of neuron apoptosis;regulation of programmed cell death;system development;transport	binding;drug binding;G-protein coupled receptor activity;molecular transducer activity;opioid receptor activity;peptide binding;peptide receptor activity;peptide receptor activity, G-protein coupled;receptor activity;signal transducer activity;signaling receptor activity;transmembrane signaling receptor activity	cell junction;cell part;cell projection part;cytoplasmic part;endoplasmic reticulum membrane;endoplasmic reticulum part;envelope;growth cone;integral to membrane;integral to plasma membrane;intracellular organelle part;intracellular part;intrinsic to membrane;intrinsic to plasma membrane;lipid particle;membrane;membrane part;nuclear envelope;nuclear inner membrane;nuclear membrane;nuclear outer m…		ERG2_Sigma1R	6	6	6	40.8	40.8	40.8	25.127	176.18	9229500000	206550000	9022900000	3.35255	6.75359	0	0.0812935	2.00904	4.73031	0	NaN	Q99720;Q99720-5;Q99720-3;Q99720-2;Q5T1J1;Q99720-4	Q99720;Q99720-5;Q99720-3;Q99720-2;Q5T1J1;Q99720-4	Sigma non-opioid intracellular receptor 1	SIGMAR1
3.31571	2.1798	3.39369	4.20828	5.03272	3.14125	3.21571	NaN	2.40904	2.47477	2.4352	NaN					cellular component organization;cellular component organization or biogenesis;cellular membrane organization;cellular process;membrane organization;nuclear membrane organization		cell part;cytoplasmic part;endoplasmic reticulum lumen;endoplasmic reticulum part;Golgi apparatus;integral to membrane;integral to nuclear inner membrane;integral to organelle membrane;intracellular membrane-bounded organelle;intracellular organelle;intracellular organelle lumen;intracellular organelle part;intracellular part;intrinsic to membrane;intrinsic to nuclear inner membrane;intrinsic to …		DUF1625	18	18	18	57.2	57.2	57.2	44.875	152.92	3511400000	286120000	3225300000	1.73849	2.86307	1.7451	4.02742	1.02697	2.71237	2.27176	2.35499	Q9BTV4;V9GY05	Q9BTV4	Transmembrane protein 43	TMEM43
NaN	4.10341	3.90005	NaN	NaN	NaN	NaN	NaN	4.07056	NaN	NaN	NaN					cellular component assembly;cellular component assembly at cellular level;cellular component organization;cellular component organization at cellular level;cellular component organization or biogenesis;cellular component organization or biogenesis at cellular level;cellular macromolecular complex assembly;cellular macromolecular complex subunit organization;cellular process;cellular protein compl…		cell part;cytoplasmic part;integral to membrane;integral to mitochondrial membrane;integral to organelle membrane;intracellular membrane-bounded organelle;intracellular organelle;intracellular organelle part;intracellular part;intrinsic to membrane;intrinsic to organelle membrane;membrane;membrane part;membrane-bounded organelle;mitochondrial inner membrane;mitochondrial membrane;mitochondrial me…		DUF1301	5	5	5	23.8	23.8	23.8	28.969	31.126	395520000	15809000	379710000	1.78022	3.90173	0	NaN	0	3.97056	0	NaN	Q9BUB7;Q9BUB7-2;D4PHA6;Q9BUB7-3	Q9BUB7;Q9BUB7-2	Transmembrane protein 70, mitochondrial	TMEM70
2.61631	2.49006	1.97148	4.47677	4.55723	4.76675	NaN	2.3374	2.69334	NaN	0.558953	NaN		+			cellular component assembly;cellular component assembly at cellular level;cellular component biogenesis;cellular component organization;cellular component organization at cellular level;cellular component organization or biogenesis;cellular component organization or biogenesis at cellular level;cellular macromolecular complex assembly;cellular macromolecular complex subunit organization;cellular …		cell part;cytoplasmic part;integral to membrane;intracellular organelle part;intracellular part;intrinsic to membrane;macromolecular complex;membrane part;mitochondrial inner membrane presequence translocase complex;mitochondrial membrane part;mitochondrial part;organelle part;protein complex		TIM21	6	6	6	25	25	25	28.202	17.78	2002000000	136590000	1865400000	2.12263	2.25928	3.43337	4.50025	1.32953	2.41537	0	0.458953	Q9BVV7;J3QRI1	Q9BVV7;J3QRI1	Mitochondrial import inner membrane translocase subunit Tim21	TIMM21
NaN	1.19654	1.14437	NaN	NaN	NaN	NaN	0.29678	NaN	-0.833028	NaN	-1.2501					cellular macromolecule metabolic process;cellular metabolic process;cellular nitrogen compound metabolic process;cellular process;cellular protein metabolic process;macromolecule metabolic process;macromolecule modification;metabolic process;mRNA metabolic process;mRNA processing;nitrogen compound metabolic process;nuclear mRNA splicing, via spliceosome;nucleic acid metabolic process;nucleobase-c…	protein tag	cell part;cytoplasm;intracellular membrane-bounded organelle;intracellular organelle;intracellular part;membrane-bounded organelle;nucleus;organelle		ubiquitin	4	4	4	43.8	43.8	43.8	8.5468	10.677	258600000	158560000	100040000	1.80937	1.07046	0	NaN	0	0.19678	0.939204	-1.14156	Q9BZL1;K7EQ43	Q9BZL1	Ubiquitin-like protein 5	UBL5
1.05325	1.43103	1.17294	0.473943	0.332622	0.488104	NaN	NaN	NaN	-0.10036	-0.0844409	-0.608078					biosynthetic process;cellular biosynthetic process;cellular macromolecule biosynthetic process;cellular macromolecule metabolic process;cellular metabolic process;cellular nitrogen compound metabolic process;cellular process;macromolecule biosynthetic process;macromolecule metabolic process;maturation of SSU-rRNA;metabolic process;ncRNA metabolic process;ncRNA processing;nitrogen compound metabol…		cell part;intracellular non-membrane-bounded organelle;intracellular organelle;intracellular organelle part;intracellular part;macromolecular complex;non-membrane-bounded organelle;nuclear part;nucleolar part;nucleolus;organelle;organelle part;protein complex;t-UTP complex		NUC205	13	13	13	20.7	20.7	20.7	81.123	39.722	1422600000	679820000	742740000	2.00981	1.11907	1.66383	0.331556	0	NaN	0.773956	-0.364293	Q9H8H0;J3QR28;J3QLQ6;Q9H8H0-2	Q9H8H0	Nucleolar protein 11	NOL11
1.85695	1.42734	1.59455	NaN	2.89264	5.22076	1.95412	1.99186	2.93846	NaN	NaN	NaN					anatomical structure development;biological regulation;brain development;cellular component organization;cellular component organization at cellular level;cellular component organization or biogenesis;cellular component organization or biogenesis at cellular level;cellular process;cellular response to stimulus;developmental process;endoplasmic reticulum organization;endoplasmic reticulum tubular …	binding;catalytic activity;GDP binding;GTP binding;GTPase activity;guanyl nucleotide binding;guanyl ribonucleotide binding;hydrolase activity;hydrolase activity, acting on acid anhydrides;hydrolase activity, acting on acid anhydrides, in phosphorus-containing anhydrides;nucleoside-triphosphatase activity;nucleotide binding;purine nucleotide binding;purine ribonucleoside triphosphate binding;purin…	cell part;cytoplasmic part;endoplasmic reticulum part;endoplasmic reticulum tubular network;extracellular membrane-bounded organelle;extracellular organelle;extracellular region part;extracellular vesicular exosome;Golgi apparatus;intracellular;intracellular membrane-bounded organelle;intracellular organelle;intracellular organelle part;intracellular part;membrane;membrane-bounded organelle;membr…		Ras	11	11	11	62.6	62.6	62.6	22.977	68.568	1603000000	258090000	1344900000	2.1776	1.52628	0.739562	3.9567	1.68082	2.19481	0	NaN	Q9NP72;Q9NP72-2;A0A087X163;H0Y6T8;Q5W0J0;Q9NP72-3	Q9NP72;Q9NP72-2;A0A087X163;H0Y6T8;Q5W0J0;Q9NP72-3	Ras-related protein Rab-18	RAB18
7.61102	7.3844	5.79898	7.61265	7.70964	7.73877	5.85539	5.75371	6.29589	8.68233	8.45043	8.72533		+	+	+	anatomical structure formation involved in morphogenesis;anatomical structure morphogenesis;angiogenesis;apoptosis;axonal fasciculation;biological regulation;cardiac epithelial to mesenchymal transition;cell death;cell migration;cell morphogenesis;cell morphogenesis involved in differentiation;cell motility;cell recognition;cell surface receptor linked signaling pathway;cellular component morphog…		cell body;cell part;cell projection;cytoplasmic part;endoplasmic reticulum;endoplasmic reticulum part;envelope;extracellular membrane-bounded organelle;extracellular organelle;extracellular region part;extracellular vesicular exosome;integral to endoplasmic reticulum membrane;integral to membrane;integral to organelle membrane;intracellular;intracellular membrane-bounded organelle;intracellular o…		Reticulon	107	107	86	84.4	84.4	60	129.93	323.31	1174000000000	29975000000	1144000000000	2.16177	6.83147	4.59776	7.58702	3.09531	5.86833	3.99822	8.51936	Q9NQC3;Q9NQC3-6;Q9NQC3-4;C9J685	Q9NQC3;Q9NQC3-6;Q9NQC3-4	Reticulon-4	RTN4
1.44917	1.34653	1.27083	0.199751	0.182184	0.411969	-0.256132	-0.403714	-0.338962	0.0446039	-0.0617971	-0.103271	+				biosynthetic process;cell differentiation;cellular biosynthetic process;cellular developmental process;cellular macromolecule biosynthetic process;cellular macromolecule metabolic process;cellular metabolic process;cellular nitrogen compound metabolic process;cellular process;developmental process;macromolecule biosynthetic process;macromolecule metabolic process;metabolic process;multi-organism …	adenyl nucleotide binding;adenyl ribonucleotide binding;ATP binding;ATPase activity;ATPase activity, coupled;ATP-dependent helicase activity;ATP-dependent RNA helicase activity;binding;catalytic activity;double-stranded RNA binding;helicase activity;hydrolase activity;hydrolase activity, acting on acid anhydrides;hydrolase activity, acting on acid anhydrides, in phosphorus-containing anhydrides;n…	cell part;cytoplasm;intracellular membrane-bounded organelle;intracellular non-membrane-bounded organelle;intracellular organelle;intracellular organelle part;intracellular part;membrane;membrane-bounded organelle;non-membrane-bounded organelle;nuclear part;nucleolus;nucleoplasm;nucleus;organelle;organelle part		DEAD;GUCT;Helicase_C	37	37	35	46.9	46.9	43.4	87.343	323.31	24930000000	13372000000	11559000000	2.77215	1.25551	0.80813	0.164634	2.01808	-0.432936	1.0647	-0.140155	Q9NR30;Q9NR30-2	Q9NR30;Q9NR30-2	Nucleolar RNA helicase 2	DDX21
2.62695	2.7936	3.22583	NaN	4.63075	3.25704	3.03383	3.37086	2.9159	NaN	NaN	NaN	+		+		cellular component organization;cellular component organization at cellular level;cellular component organization or biogenesis;cellular component organization or biogenesis at cellular level;cellular macromolecule metabolic process;cellular membrane organization;cellular metabolic process;cellular process;cellular protein metabolic process;establishment of localization;establishment of localizat…	macromolecule transmembrane transporter activity;protein transmembrane transporter activity;protein transporter activity;substrate-specific transmembrane transporter activity;substrate-specific transporter activity;transmembrane transporter activity;transporter activity	cell part;cytoplasmic part;integral to membrane;intracellular membrane-bounded organelle;intracellular organelle;intracellular organelle part;intracellular part;intrinsic to membrane;macromolecular complex;membrane;membrane part;membrane-bounded organelle;mitochondrial inner membrane;mitochondrial membrane;mitochondrial membrane part;mitochondrial outer membrane translocase complex;mitochondrial …		Tom22	7	7	7	77.5	77.5	77.5	15.521	109.05	1247600000	106600000	1141000000	2.38836	2.78213	0.948585	3.8439	2.68846	3.00686	0	NaN	Q9NS69	Q9NS69	Mitochondrial import receptor subunit TOM22 homolog	TOMM22
3.11071	2.84996	3.26978	2.78394	2.3989	2.7972	3.65855	3.49172	3.56925	2.49866	2.60303	2.47708	+	+	+	+	biological regulation;negative regulation of biological process;negative regulation of biosynthetic process;negative regulation of cellular biosynthetic process;negative regulation of cellular macromolecule biosynthetic process;negative regulation of cellular metabolic process;negative regulation of cellular process;negative regulation of gene expression;negative regulation of macromolecule biosy…	adenyl nucleotide binding;adenyl ribonucleotide binding;ATP binding;binding;catalytic activity;GTP binding;guanyl nucleotide binding;guanyl ribonucleotide binding;lipid binding;nucleotide binding;phosphatidylinositol binding;phosphatidylinositol-3-phosphate binding;phosphatidylinositol-4-phosphate binding;phosphatidylinositol-5-phosphate binding;phospholipid binding;purine nucleotide binding;puri…	cell cortex part;cell part;cortical actin cytoskeleton;cortical cytoskeleton;cytoplasm;cytoplasmic part;cytoskeletal part;cytoskeleton;cytosol;intracellular membrane-bounded organelle;intracellular non-membrane-bounded organelle;intracellular organelle;intracellular organelle part;intracellular part;membrane;membrane-bounded organelle;non-membrane-bounded organelle;nucleus;organelle;organelle par…		LANC_like	16	16	16	45.3	45.3	45.3	50.854	113.98	3889100000	926310000	2962800000	2.77324	2.97682	2.5862	2.56001	3.71549	3.47318	3.59042	2.42626	Q9NS86	Q9NS86	LanC-like protein 2	LANCL2
1.13034	1.38665	1.08658	0.702835	0.430285	0.813935	NaN	NaN	NaN	NaN	0.763667	1.20733					biological regulation;biosynthetic process;cellular biosynthetic process;cellular macromolecule biosynthetic process;cellular macromolecule metabolic process;cellular metabolic process;cellular nitrogen compound metabolic process;cellular process;macromolecule biosynthetic process;macromolecule metabolic process;metabolic process;nitrogen compound metabolic process;nucleic acid metabolic process;…		cell part;cytoplasmic part;intracellular membrane-bounded organelle;intracellular organelle;intracellular organelle part;intracellular part;membrane-bounded organelle;mitochondrion;nuclear part;nucleoplasm;organelle;organelle part			5	5	5	14.3	14.3	14.3	33.216	6.6555	912450000	479330000	433120000	2.14598	1.10119	1.3926	0.549018	0	NaN	0.806131	0.885499	Q9NWB6;Q9NWB6-3;Q9NWB6-2;X6R9F1	Q9NWB6;Q9NWB6-3;Q9NWB6-2	Arginine and glutamate-rich protein 1	ARGLU1
1.8808	1.98619	NaN	4.8517	5.24493	4.52268	NaN	1.97501	2.37226	NaN	NaN	NaN		+			acyl-CoA biosynthetic process;acyl-CoA metabolic process;acylglycerol biosynthetic process;acylglycerol metabolic process;biosynthetic process;carboxylic acid biosynthetic process;carboxylic acid metabolic process;cellular biosynthetic process;cellular ketone metabolic process;cellular lipid metabolic process;cellular metabolic process;cellular process;coenzyme biosynthetic process;coenzyme metab…	catalytic activity;oxidoreductase activity;oxidoreductase activity, acting on the CH-CH group of donors	cell part;cytoplasmic part;endoplasmic reticulum;endoplasmic reticulum membrane;endoplasmic reticulum part;integral to endoplasmic reticulum membrane;integral to membrane;integral to organelle membrane;intracellular membrane-bounded organelle;intracellular organelle;intracellular organelle part;intracellular part;intrinsic to endoplasmic reticulum membrane;intrinsic to membrane;intrinsic to organ…	Biosynthesis of unsaturated fatty acids	Steroid_dh	13	13	13	33.4	33.4	33.4	36.034	69.491	2124700000	270020000	1854700000	1.73775	1.8335	2.71952	4.7731	1.21614	2.07363	0	NaN	Q9NZ01;M0R3C3;M0QXM3;Q9NZ01-2;M0R329;B4DR74	Q9NZ01	Very-long-chain enoyl-CoA reductase	TECR
1.7054	1.8585	1.67482	NaN	4.98021	NaN	1.57826	1.63543	1.49006	0.823423	1.69684	NaN	+		+		biological regulation;calcium-mediated signaling;cellular metabolic process;cellular nitrogen compound metabolic process;cellular process;cellular response to stimulus;cyclic nucleotide metabolic process;cyclic-nucleotide-mediated signaling;establishment of localization;establishment of localization in cell;inositol phosphate metabolic process;intracellular signal transduction;intracellular trans…	binding;catalytic activity;cation binding;diphosphoinositol-polyphosphate diphosphatase activity;hydrolase activity;hydrolase activity, acting on acid anhydrides;hydrolase activity, acting on acid anhydrides, in phosphorus-containing anhydrides;ion binding;metal ion binding;nucleic acid binding;pyrophosphatase activity;RNA binding;snoRNA binding	cell part;cytoplasmic part;cytosol;intracellular;intracellular part		NUDIX	2	2	2	16.3	16.3	16.3	14.395	2.3242	3382200000	741050000	2641200000	2.92478	1.64624	0	4.88021	3.08161	1.46792	0.639789	1.16013	Q9NZJ9-3;Q9NZJ9-2;F8VRL4;F8VRR0;A0A0C4DGJ4;Q96G61;Q8NFP7;Q9NZJ9	Q9NZJ9-3;Q9NZJ9-2;F8VRL4;F8VRR0;A0A0C4DGJ4;Q96G61;Q8NFP7;Q9NZJ9	Diphosphoinositol polyphosphate phosphohydrolase 2;Diphosphoinositol polyphosphate phosphohydrolase 3-beta;Diphosphoinositol polyphosphate phosphohydrolase 3-alpha	NUDT4;NUDT11;NUDT10
4.00531	3.96993	4.85215	5.86651	5.69393	5.6941	2.64888	2.7006	2.62448	NaN	NaN	2.31264	+	+	+		activation of JUN kinase activity;activation of MAPK activity;biological regulation;biosynthetic process;carboxylic acid biosynthetic process;carboxylic acid metabolic process;cellular biosynthetic process;cellular ketone metabolic process;cellular lipid metabolic process;cellular macromolecule metabolic process;cellular metabolic process;cellular process;cellular protein metabolic process;cellul…	3-hydroxyacyl-CoA dehydratase activity;binding;carbon-oxygen lyase activity;catalytic activity;enzyme activator activity;enzyme binding;enzyme regulator activity;GTPase activator activity;GTPase regulator activity;hydro-lyase activity;lyase activity;nucleoside-triphosphatase regulator activity;protein binding	adherens junction;anchoring junction;cell junction;cell part;cell-substrate adherens junction;cell-substrate junction;cytoplasmic part;endoplasmic reticulum;endoplasmic reticulum membrane;endoplasmic reticulum part;focal adhesion;integral to membrane;intracellular membrane-bounded organelle;intracellular organelle;intracellular organelle part;intracellular part;intrinsic to membrane;membrane;memb…		CS;PTPLA	15	15	15	36.2	36.2	36.2	43.159	167.18	9495800000	721370000	8774400000	2.32471	4.1758	3.98508	5.65152	4.11378	2.55798	0	2.21264	Q9P035;H3BS72;H3BPZ1;Q9P035-2;H3BRL8;H3BMZ1	Q9P035;H3BS72;H3BPZ1	Very-long-chain (3R)-3-hydroxyacyl-CoA dehydratase 3	HACD3
2.4822	2.2681	2.38181	2.67584	2.73686	2.73784	2.39138	2.35806	2.168	2.99164	2.97087	2.87015	+	+	+	+	biological regulation;biosynthetic process;cell death;cell projection organization;cellular biosynthetic process;cellular component organization;cellular component organization at cellular level;cellular component organization or biogenesis;cellular component organization or biogenesis at cellular level;cellular lipid metabolic process;cellular localization;cellular macromolecule localization;cel…	binding;cytoskeletal protein binding;FFAT motif binding;microtubule binding;molecular transducer activity;protein binding;protein dimerization activity;protein domain specific binding;protein heterodimerization activity;signal transducer activity;tubulin binding	cell part;cytoplasmic part;cytoskeleton;endoplasmic reticulum;endoplasmic reticulum membrane;endoplasmic reticulum part;Golgi apparatus part;Golgi membrane;integral to membrane;intracellular membrane-bounded organelle;intracellular non-membrane-bounded organelle;intracellular organelle;intracellular organelle part;intracellular part;intrinsic to membrane;membrane;membrane part;membrane-bounded or…	Tight junction	Motile_Sperm	16	16	15	74.3	74.3	74.3	27.893	177.84	18569000000	4580600000	13989000000	3.13274	2.27737	4.21182	2.61685	3.00288	2.20581	3.75954	2.84422	Q9P0L0;Q9P0L0-2;J3QKM9	Q9P0L0;Q9P0L0-2	Vesicle-associated membrane protein-associated protein A	VAPA
1.25199	1.1277	1.17396	NaN	1.12148	0.862352	0.275722	0.104337	-0.221758	-0.0938944	0.516822	-0.464803	+				anatomical structure development;biological regulation;cell communication;cell surface receptor linked signaling pathway;cell-cell signaling;cellular metabolic process;cellular process;cellular response to chemical stimulus;cellular response to endogenous stimulus;cellular response to glucagon stimulus;cellular response to hormone stimulus;cellular response to organic substance;cellular response …	anion binding;binding;ion binding;molecular transducer activity;PDZ domain binding;phosphate ion binding;protein binding;protein domain specific binding;signal transducer activity	actin filament;cell part;cytoskeletal part;extracellular membrane-bounded organelle;extracellular organelle;extracellular region part;extracellular vesicular exosome;extrinsic to internal side of plasma membrane;extrinsic to membrane;extrinsic to plasma membrane;heterotrimeric G-protein complex;intracellular organelle part;intracellular part;macromolecular complex;membrane;membrane part;membrane-…	Chemokine signaling pathway;MAPK signaling pathway;Regulation of actin cytoskeleton	G-gamma	7	7	7	80.6	80.6	80.6	8.0061	49.864	3909200000	2231900000	1677300000	2.95216	1.08455	1.03699	0.891916	0.109654	-0.0472329	0.137295	-0.113958	Q9UBI6	Q9UBI6	Guanine nucleotide-binding protein G(I)/G(S)/G(O) subunit gamma-12	GNG12
5.37799	5.86129	2.94326	NaN	NaN	4.18063	2.45586	4.84995	5.2857	NaN	NaN	NaN					adenine transport;cellular process;establishment of localization;nitrogen compound transport;nucleobase transport;nucleobase-containing compound transport;purine base transport;purine-containing compound transmembrane transport;transmembrane transport;transport	anion channel activity;anion transmembrane transporter activity;binding;channel activity;gated channel activity;ion channel activity;ion transmembrane transporter activity;nucleotide binding;passive transmembrane transporter activity;porin activity;substrate-specific channel activity;substrate-specific transmembrane transporter activity;substrate-specific transporter activity;transmembrane transp…	cell part;cytoplasmic part;extracellular membrane-bounded organelle;extracellular organelle;extracellular region part;extracellular vesicular exosome;intracellular membrane-bounded organelle;intracellular organelle;intracellular organelle part;intracellular part;macromolecular complex;membrane;membrane part;membrane-bounded organelle;membrane-bounded vesicle;mitochondrial membrane;mitochondrial o…	Calcium signaling pathway;Huntington's disease;Parkinson's disease	Porin_3	11	11	11	53	53	53	30.658	182.7	3404200000	129740000	3274500000	1.44333	4.62751	0	4.08063	1.36514	4.09717	0	NaN	Q9Y277;Q9Y277-2;E5RJN6;E5RHZ6;E5RFP6;E5RHE1;E5RK27;E5RFL1	Q9Y277;Q9Y277-2;E5RJN6;E5RHZ6;E5RFP6	Voltage-dependent anion-selective channel protein 3	VDAC3
0.918768	1.13973	1.2655	0.413052	0.494057	0.383829	NaN	NaN	NaN	-0.563689	-0.59031	-0.558517				+	cell growth;cellular macromolecule metabolic process;cellular metabolic process;cellular nitrogen compound metabolic process;cellular process;establishment of localization;establishment of localization in cell;establishment of protein localization;growth;intracellular protein transport;intracellular transport;macromolecule metabolic process;macromolecule modification;metabolic process;ncRNA metab…	binding;nucleic acid binding;RNA binding;snoRNA binding	box C/D snoRNP complex;Cajal body;cell part;cytoplasm;intracellular membrane-bounded organelle;intracellular non-membrane-bounded organelle;intracellular organelle;intracellular organelle part;intracellular part;macromolecular complex;membrane;membrane-bounded organelle;non-membrane-bounded organelle;nuclear body;nuclear part;nucleolar part;nucleolus;nucleoplasm part;nucleus;organelle;organelle p…	Ribosome biogenesis in eukaryotes	Nop;NOP5NT;NOSIC	20	20	20	49.9	49.9	49.9	59.578	305.92	17428000000	9350600000	8077400000	2.00187	1.008	2.00805	0.330313	0	NaN	3.66653	-0.670839	Q9Y2X3;H7BZ72;F8WED0	Q9Y2X3	Nucleolar protein 58	NOP58
1.33102	1.04684	0.997473	NaN	0.564524	0.405666	-0.770461	0.115832	-0.151923	-0.609024	-0.0115443	-0.0277779					cellular macromolecule metabolic process;cellular metabolic process;cellular nitrogen compound metabolic process;cellular process;gene expression;macromolecule metabolic process;metabolic process;mRNA metabolic process;mRNA processing;nitrogen compound metabolic process;nuclear mRNA splicing, via spliceosome;nucleic acid metabolic process;nucleobase-containing compound metabolic process;primary m…	binding;nucleotide binding	cell part;intracellular organelle part;intracellular part;macromolecular complex;nuclear part;nucleoplasm;organelle part;ribonucleoprotein complex;spliceosomal complex;U12-type spliceosomal complex	Spliceosome	RRM_1	5	5	5	48	48	48	14.585	51.324	2195300000	1021400000	1173900000	1.99465	1.02511	0.887755	0.385095	0.530034	-0.368851	0.603864	-0.316115	Q9Y3B4	Q9Y3B4	Splicing factor 3B subunit 6	SF3B6
4.39294	4.47606	4.76447	4.98121	2.15361	5.1694	3.88039	4.02396	3.92533	NaN	1.80012	NaN	+		+		cellular localization;cellular macromolecule localization;cellular process;cellular protein localization;establishment of localization;localization;macromolecule localization;protein localization;protein localization in mitochondrion;protein localization to organelle;transport		cell part;cytoplasmic part;extracellular membrane-bounded organelle;extracellular organelle;extracellular region part;extracellular vesicular exosome;integral to membrane;intracellular membrane-bounded organelle;intracellular organelle;intracellular organelle part;intracellular part;intrinsic to membrane;membrane;membrane part;membrane-bounded organelle;membrane-bounded vesicle;mitochondrial inne…		Mito_carr	13	13	13	59.4	59.4	59.4	33.331	205.66	6762100000	490970000	6271100000	3.19315	4.44449	1.2628	4.00141	3.91472	3.84323	0	1.70012	Q9Y6C9;E9PIE4	Q9Y6C9;E9PIE4	Mitochondrial carrier homolog 2	MTCH2
1.60117	1.5674	1.64805	0.66175	0.547351	0.666393	NaN	NaN	-1.80143	-0.569201	-0.440812	-0.371926	+	+			apoptosis;apoptotic chromosome condensation;biological regulation;cell death;cell differentiation;cellular component disassembly;cellular component disassembly at cellular level;cellular component disassembly involved in apoptosis;cellular component organization;cellular component organization at cellular level;cellular component organization or biogenesis;cellular component organization or bioge…	ATPase activity;binding;catalytic activity;enzyme binding;hydrolase activity;hydrolase activity, acting on acid anhydrides;hydrolase activity, acting on acid anhydrides, in phosphorus-containing anhydrides;nucleic acid binding;nucleoside-triphosphatase activity;nucleotide binding;protein binding;pyrophosphatase activity	cell part;cytoplasm;cytoplasmic part;cytosol;intracellular membrane-bounded organelle;intracellular non-membrane-bounded organelle;intracellular organelle;intracellular organelle part;intracellular part;membrane;membrane-bounded organelle;non-membrane-bounded organelle;nuclear body;nuclear part;nuclear speck;nucleolus;nucleoplasm;nucleoplasm part;nucleus;organelle;organelle part;plasma membrane	mRNA surveillance pathway;RNA transport;Spliceosome	SAP	40	40	1	36.9	36.9	1.3	145.44	323.31	10862000000	5354700000	5507800000	3.61769	1.50554	2.26359	0.525165	0	-1.90143	1.9803	-0.560646	S4R3H4;Q9UKV3;Q9UKV3-5;Q9UKV3-3;Q9UKV3-2;G3V3B0;G3V3T3;A0A087WYN3	S4R3H4;Q9UKV3;Q9UKV3-5	Apoptotic chromatin condensation inducer in the nucleus	ACIN1
1.14228	1.199	1.05936	0.518233	0.511873	0.361881	0.850799	0.406428	-0.578822	-0.761066	-0.628988	-0.642955	+				biological regulation;biosynthetic process;cellular biosynthetic process;cellular component organization;cellular component organization at cellular level;cellular component organization or biogenesis;cellular component organization or biogenesis at cellular level;cellular macromolecule biosynthetic process;cellular macromolecule metabolic process;cellular metabolic process;cellular nitrogen comp…	protein binding transcription factor activity;transcription cofactor activity;transcription corepressor activity;transcription factor binding transcription factor activity	cell part;chromatin remodeling complex;cytoplasm;histone deacetylase complex;intracellular organelle part;intracellular part;macromolecular complex;nuclear body;nuclear part;nuclear speck;nucleoplasm;nucleoplasm part;organelle part;protein complex	mRNA surveillance pathway;RNA transport	SAP18	14	14	14	75.6	75.6	75.6	19.526	205.73	9721700000	5109700000	4611900000	2.81374	1.03355	1.71812	0.363995	0.100499	0.126135	2.5392	-0.77767	X6RAL5;O00422;H7BZW6;U3KPY7;U3KQ12	X6RAL5;O00422;H7BZW6	Histone deacetylase complex subunit SAP18	SAP18
NaN	NaN	NaN	NaN	NaN	NaN	NaN	NaN	NaN	NaN	NaN	NaN					alcohol metabolic process;cholesterol metabolic process;establishment of localization;lipid metabolic process;lipid transport;metabolic process;organic substance transport;primary metabolic process;small molecule metabolic process;steroid metabolic process;sterol metabolic process;transport	binding;lipid binding;nucleic acid binding;RNA binding	cell part;cytoplasm;extracellular region part;high-density lipoprotein particle;intracellular membrane-bounded organelle;intracellular organelle;intracellular part;macromolecular complex;membrane;membrane-bounded organelle;nucleus;organelle;plasma lipoprotein particle;plasma membrane;protein-lipid complex		KH_1	2	2	2	2.8	2.8	2.8	141.44	2.4556	17809000	10314000	7495800	0	NaN	0	NaN	0	NaN	0	NaN	A0A024R4E5;Q00341-2;Q00341;C9JT62;C9JHS7;C9JK79;C9JHZ8;C9JES8;C9JZI8;C9J5E5;C9JIZ1;H0Y394	A0A024R4E5;Q00341-2;Q00341;C9JT62;C9JHS7;C9JK79;C9JHZ8;C9JES8;C9JZI8;C9J5E5;C9JIZ1;H0Y394	Vigilin	HDLBP
NaN	NaN	NaN	NaN	NaN	NaN	NaN	NaN	NaN	NaN	NaN	NaN							cell part;integral to membrane;intrinsic to membrane;membrane part		TMPIT	1	1	1	6.3	6.3	6.3	20.459	3.3725	6840000	0	6840000	0	NaN	0	NaN	0	NaN	0	NaN	A0A087WZA9;A0A024R4K9;A0A087X266;Q9BXJ8-2;Q9BXJ8	A0A087WZA9;A0A024R4K9;A0A087X266;Q9BXJ8-2;Q9BXJ8	Transmembrane protein 120A	TMEM120A;TMPIT
-0.24168	-0.266906	-0.370993	-0.385695	-0.364348	-0.444086	-0.235773	-0.253636	-0.168123	0.274769	0.405339	0.349139		+			biological regulation;biosynthetic process;catabolic process;cellular biosynthetic process;cellular catabolic process;cellular component disassembly;cellular component disassembly at cellular level;cellular component organization;cellular component organization at cellular level;cellular component organization or biogenesis;cellular component organization or biogenesis at cellular level;cellular …	binding;nucleic acid binding;RNA binding;rRNA binding;structural constituent of ribosome;structural molecule activity;translation regulator activity	adherens junction;anchoring junction;cell junction;cell part;cell-substrate adherens junction;cell-substrate junction;cytoplasm;cytoplasmic part;cytosol;cytosolic small ribosomal subunit;extracellular membrane-bounded organelle;extracellular organelle;extracellular region part;extracellular vesicular exosome;focal adhesion;intracellular membrane-bounded organelle;intracellular non-membrane-bounde…	Ribosome	Ribosomal_S4;S4	19	19	19	58.2	58.2	58.2	22.591	63.601	103330000000	68091000000	35241000000	2.00089	-0.393193	2.6417	-0.498043	2.181	-0.319177	1.63163	0.243082	A0A024R4M0;P46781;B5MCT8;C9JM19;F2Z3C0;A8MXK4	A0A024R4M0;P46781;B5MCT8;C9JM19	40S ribosomal protein S9	RPS9
NaN	NaN	NaN	NaN	NaN	NaN	NaN	NaN	NaN	NaN	NaN	NaN					activation of immune response;activation of innate immune response;anaphase-promoting complex-dependent proteasomal ubiquitin-dependent protein catabolic process;antigen processing and presentation;antigen processing and presentation of exogenous antigen;antigen processing and presentation of exogenous peptide antigen;antigen processing and presentation of exogenous peptide antigen via MHC class …	catalytic activity;endopeptidase activity;hydrolase activity;peptidase activity;peptidase activity, acting on L-amino acid peptides;threonine-type endopeptidase activity;threonine-type peptidase activity	cell part;cytoplasm;cytoplasmic mRNA processing body;cytoplasmic part;cytosol;extracellular membrane-bounded organelle;extracellular organelle;extracellular region part;extracellular vesicular exosome;intracellular membrane-bounded organelle;intracellular non-membrane-bounded organelle;intracellular organelle;intracellular organelle part;intracellular part;macromolecular complex;membrane-bounded …	Proteasome	Proteasome;Proteasome_A_N	4	4	4	28.6	28.6	28.6	25.898	26.476	71235000	28422000	42813000	0	NaN	0	NaN	0	NaN	0	NaN	A0A024RA52;P25787;H3BT36;H7C402;C9JCK5	A0A024RA52;P25787;H3BT36	Proteasome subunit alpha type;Proteasome subunit alpha type-2	PSMA2
NaN	NaN	NaN	NaN	NaN	NaN	NaN	NaN	NaN	-0.140969	NaN	NaN					biological regulation;biosynthetic process;cellular biosynthetic process;cellular macromolecule biosynthetic process;cellular macromolecule metabolic process;cellular metabolic process;cellular nitrogen compound metabolic process;cellular process;cellular protein metabolic process;gene expression;macromolecule biosynthetic process;macromolecule metabolic process;macromolecule modification;metabol…	binding;DNA binding;nucleic acid binding;RNA binding;translation elongation factor activity;translation factor activity, nucleic acid binding	cell part;cytoplasm;elongin complex;extracellular region part;extracellular space;integral to membrane;intracellular membrane-bounded organelle;intracellular organelle;intracellular organelle part;intracellular part;intrinsic to membrane;macromolecular complex;membrane part;membrane-bounded organelle;nuclear part;nucleoplasm;nucleoplasm part;nucleus;organelle;organelle part;protein complex;transc…		Elongin_A;Med26	2	2	2	3.5	3.5	3.5	87.229	21.695	72502000	45856000	26646000	0	NaN	0	NaN	0	NaN	0	-0.240969	A0A024RAC6;Q14241	A0A024RAC6;Q14241	Transcription elongation factor B polypeptide 3	TCEB3
NaN	NaN	NaN	NaN	NaN	NaN	NaN	NaN	NaN	NaN	NaN	NaN					metabolic process	catalytic activity;hydrolase activity;hydrolase activity, acting on ester bonds;palmitoyl-(protein) hydrolase activity;thiolester hydrolase activity	cell part;cytoplasmic part;extracellular membrane-bounded organelle;extracellular organelle;extracellular region part;extracellular vesicular exosome;intracellular membrane-bounded organelle;intracellular organelle;intracellular part;lysosome;lytic vacuole;membrane-bounded organelle;membrane-bounded vesicle;organelle;vacuole;vesicle	Fatty acid elongation in mitochondria;Lysosome	Abhydrolase_6;Palm_thioest	1	1	1	17.8	17.8	17.8	20.398	24.924	32867000	32867000	0	0	NaN	0	NaN	0	NaN	0	NaN	G8JLL2;A0A0G2JK02;A0A0G2JIU6;A0A0G2JHB6;A0A0G2JKR3;A0A0G2JLL3;A0A0G2JLA3;A0A0G2JH76;A0A024RCQ8;Q9UMR5-2;Q9UMR5;Q9UMR5-3	G8JLL2;A0A0G2JK02;A0A0G2JIU6;A0A0G2JHB6;A0A0G2JKR3;A0A0G2JLL3;A0A0G2JLA3;A0A0G2JH76;A0A024RCQ8;Q9UMR5-2;Q9UMR5;Q9UMR5-3	Lysosomal thioesterase PPT2	PPT2;hCG_1999928
NaN	NaN	NaN	NaN	NaN	NaN	NaN	NaN	NaN	NaN	NaN	NaN					anatomical structure development;apoptosis;apoptosis in response to endoplasmic reticulum stress;biological regulation;brain development;catabolic process;cell cycle process;cell death;cell differentiation;cellular catabolic process;cellular component assembly;cellular component assembly at cellular level;cellular component organization;cellular component organization at cellular level;cellular c…	binding;enzyme binding;polyubiquitin binding;proteasome binding;protein binding;protein complex binding;ribonucleoprotein binding;ribosome binding;small conjugating protein binding;ubiquitin binding;ubiquitin protein ligase binding	BAT3 complex;cell part;cytoplasm;cytoplasmic part;cytosol;cytosolic part;ER membrane insertion complex;intracellular membrane-bounded organelle;intracellular organelle;intracellular organelle part;intracellular part;macromolecular complex;membrane-bounded organelle;nuclear part;nucleoplasm;nucleus;organelle;organelle part;protein complex		DUF3538;ubiquitin	1	1	1	2.5	2.5	2.5	54.67	2.3953	5773400	0	5773400	0	NaN	0	NaN	0	NaN	0	NaN	F6S6P2;X6REW1;A0A0G2JJM1;A0A0G2JL47;A0A024RCR6;A0A0G2JK23;P46379-4;P46379-5;P46379-2;P46379;P46379-3	F6S6P2;X6REW1;A0A0G2JJM1;A0A0G2JL47;A0A024RCR6;A0A0G2JK23;P46379-4;P46379-5;P46379-2;P46379;P46379-3	Large proline-rich protein BAG6	BAG6;BAT3
NaN	NaN	NaN	NaN	NaN	NaN	NaN	NaN	0.132774	NaN	NaN	NaN					biological regulation;metabolic process;negative regulation of catalytic activity;negative regulation of molecular function;negative regulation of monooxygenase activity;negative regulation of nitric-oxide synthase activity;negative regulation of oxidoreductase activity;nitric oxide metabolic process;nitrogen compound metabolic process;regulation of biological process;regulation of catalytic acti…	acid-amino acid ligase activity;catalytic activity;ligase activity;ligase activity, forming carbon-nitrogen bonds;small conjugating protein ligase activity;ubiquitin-protein ligase activity	cell part;cytoplasm;cytoplasmic part;cytosol;Golgi apparatus part;Golgi membrane;intracellular membrane-bounded organelle;intracellular organelle;intracellular organelle part;intracellular part;membrane;membrane-bounded organelle;nuclear part;nucleoplasm;nucleus;organelle;organelle membrane;organelle part		Rtf2	2	2	2	11.2	11.2	11.2	25.62	6.6299	24814000	14249000	10564000	0	NaN	0	NaN	0	0.0327743	0	NaN	A0A075B797;M0R3B2;A0A075B6F9;Q9Y314;M0QX85;M0R1K2	A0A075B797;M0R3B2;A0A075B6F9;Q9Y314;M0QX85;M0R1K2	Nitric oxide synthase-interacting protein	NOSIP
NaN	NaN	NaN	NaN	-1.81365	NaN	NaN	NaN	NaN	NaN	NaN	NaN					activation of immune response;anatomical structure homeostasis;biological regulation;cellular component organization;cellular component organization or biogenesis;cellular membrane organization;cellular process;complement activation;complement activation, classical pathway;defense response;endocytosis;establishment of localization;homeostatic process;humoral immune response;immune effector proces…	antigen binding;binding	blood microparticle;cell part;extracellular membrane-bounded organelle;extracellular organelle;extracellular region;extracellular region part;extracellular space;extracellular vesicular exosome;membrane;membrane-bounded organelle;membrane-bounded vesicle;organelle;plasma membrane;vesicle		C1-set;V-set	3	3	3	49.5	49.5	49.5	11.609	22.162	332370000	154250000	178120000	0	NaN	0	-1.91365	0	NaN	0	NaN	A0A075B6H6;A0A087WZW8;A0A087X1V9;P01834;A0A0U1RRF4;A0A087WWV8	A0A075B6H6;A0A087WZW8;A0A087X1V9;P01834	Ig kappa chain C region	IGKC;IGKV3-11
NaN	NaN	NaN	NaN	NaN	NaN	NaN	NaN	NaN	NaN	NaN	NaN					activation of immune response;biological regulation;cellular component organization;cellular component organization or biogenesis;cellular membrane organization;cellular process;complement activation;complement activation, classical pathway;defense response;endocytosis;establishment of localization;humoral immune response;immune effector process;immune response;immune system process;innate immune…	antigen binding;binding	blood microparticle;cell part;extracellular membrane-bounded organelle;extracellular organelle;extracellular region;extracellular region part;extracellular space;extracellular vesicular exosome;membrane;membrane-bounded organelle;membrane-bounded vesicle;organelle;plasma membrane;vesicle		C1-set	3	3	3	37.7	37.7	37.7	11.208	10.483	313850000	308700000	5154400	0	NaN	0	NaN	0	NaN	0	NaN	A0A075B6L0;A0A075B6K9;P0CG06;P0CG05;A0A075B6K8;A0A0B4J231;P0CG04;P0CF74;B9A064;A0A075B6L1;A0M8Q6	A0A075B6L0;A0A075B6K9;P0CG06;P0CG05;A0A075B6K8;A0A0B4J231;P0CG04;P0CF74;B9A064	Ig lambda-3 chain C regions;Ig lambda-2 chain C regions;Ig lambda-1 chain C regions;Ig lambda-6 chain C region;Immunoglobulin lambda-like polypeptide 5	IGLC3;IGLC2;IGLC1;IGLL5;IGLC6
-0.0182788	NaN	NaN	NaN	-0.0412686	-0.315217	NaN	NaN	0.926683	NaN	NaN	0.888149					biosynthetic process;cellular biosynthetic process;cellular component disassembly;cellular component disassembly at cellular level;cellular component organization;cellular component organization at cellular level;cellular component organization or biogenesis;cellular component organization or biogenesis at cellular level;cellular macromolecular complex disassembly;cellular macromolecular complex …	structural constituent of ribosome;structural molecule activity	cell part;cytoplasmic part;intracellular non-membrane-bounded organelle;intracellular organelle;intracellular organelle part;intracellular part;macromolecular complex;membrane;mitochondrial inner membrane;mitochondrial membrane;mitochondrial part;mitochondrial small ribosomal subunit;non-membrane-bounded organelle;organellar small ribosomal subunit;organelle;organelle inner membrane;organelle mem…		Ribosomal_S21	3	3	3	39.1	39.1	39.1	10.688	14.336	127550000	70132000	57420000	0	-0.118279	0.535771	-0.278243	0	0.826683	0	0.788149	A0A075B746;P82921	A0A075B746;P82921	28S ribosomal protein S21, mitochondrial	MRPS21
0.742696	0.511569	0.245131	0.505688	0.063779	NaN	NaN	NaN	NaN	-0.0193312	0.121015	NaN					cellular macromolecule metabolic process;cellular metabolic process;cellular nitrogen compound metabolic process;cellular process;cellular protein metabolic process;macromolecule metabolic process;macromolecule modification;maturation of SSU-rRNA;maturation of SSU-rRNA from tricistronic rRNA transcript (SSU-rRNA, 5.8S rRNA, LSU-rRNA);metabolic process;ncRNA metabolic process;ncRNA processing;nitr…		cell part;CUL4 RING ubiquitin ligase complex;cullin-RING ubiquitin ligase complex;intracellular non-membrane-bounded organelle;intracellular organelle;intracellular organelle part;intracellular part;macromolecular complex;non-membrane-bounded organelle;nuclear part;nucleolus;organelle;organelle part;preribosome;protein complex;ribonucleoprotein complex;small-subunit processome;ubiquitin ligase co…		Sof1;WD40	12	12	12	20.4	20.4	20.4	67.55	26.779	642530000	373070000	269460000	0.964063	0.399799	0.254387	0.184733	0	NaN	0.213975	-0.0491579	A0A087WT20;Q9NV06;B3KME9;E5RHM4;A0A087X1F8;Q9NV06-2	A0A087WT20;Q9NV06;B3KME9	DDB1- and CUL4-associated factor 13	DCAF13
NaN	NaN	NaN	NaN	NaN	NaN	NaN	NaN	NaN	NaN	NaN	NaN					carboxylic acid metabolic process;cellular ketone metabolic process;cellular lipid metabolic process;cellular metabolic process;cellular process;fatty acid metabolic process;lipid metabolic process;metabolic process;monocarboxylic acid metabolic process;organic acid metabolic process;oxoacid metabolic process;primary metabolic process;small molecule metabolic process	catalytic activity;lyase activity	cell part;cytoplasmic part;intracellular membrane-bounded organelle;intracellular organelle;intracellular part;membrane-bounded organelle;mitochondrion;organelle		MaoC_dehydratas	1	1	1	36.8	36.8	36.8	8.803	15.004	10485000	10485000	0	0	NaN	0	NaN	0	NaN	0	NaN	A0A087WTC8;L0R6P0;P86397	A0A087WTC8;L0R6P0;P86397	Hydroxyacyl-thioester dehydratase type 2, mitochondrial	RPP14
NaN	NaN	NaN	NaN	NaN	NaN	NaN	NaN	NaN	NaN	NaN	NaN					acylglycerol catabolic process;acylglycerol metabolic process;alcohol metabolic process;anatomical structure development;anatomical structure morphogenesis;artery morphogenesis;biological regulation;biosynthetic process;blood coagulation;blood vessel morphogenesis;catabolic process;cell migration;cell motility;cellular biosynthetic process;cellular catabolic process;cellular component assembly;ce…	binding;carbohydrate binding;cholesterol transporter activity;enzyme binding;glycosaminoglycan binding;heparin binding;lipase binding;lipid binding;lipid transporter activity;lipoprotein particle receptor binding;low-density lipoprotein particle receptor binding;pattern binding;phospholipid binding;polysaccharide binding;protein binding;receptor binding;sterol transporter activity;substrate-speci…	actin cytoskeleton;cell body;cell part;chylomicron;chylomicron remnant;clathrin coated vesicle membrane;clathrin-coated endocytic vesicle membrane;coated vesicle membrane;cytoplasm;cytoplasmic membrane-bounded vesicle lumen;cytoplasmic part;cytoplasmic vesicle membrane;cytoplasmic vesicle part;cytoskeleton;cytosol;early endosome;endocytic vesicle lumen;endocytic vesicle membrane;endoplasmic retic…	Fat digestion and absorption;Vitamin digestion and absorption	ApoB100_C;DUF1081;DUF1943;Vitellogenin_N	5	2	2	1.3	0.5	0.5	489.83	7.8088	97563000	96432000	1130800	0	NaN	0	NaN	0	NaN	0	NaN	A0A087WTM7;P04114	A0A087WTM7;P04114	Apolipoprotein B-100;Apolipoprotein B-48	APOB
0.400429	0.581303	0.59703	0.555423	0.770702	0.177599	0.425459	0.378401	0.59827	0.201634	-0.0866299	NaN					biological regulation;biosynthetic process;catabolic process;cellular biosynthetic process;cellular catabolic process;cellular macromolecule biosynthetic process;cellular macromolecule catabolic process;cellular macromolecule metabolic process;cellular metabolic process;cellular nitrogen compound metabolic process;cellular process;establishment of localization;establishment of RNA localization;ge…	binding;DNA binding;mRNA binding;nucleic acid binding;RNA binding	cell part;cytoplasmic part;cytosol;intracellular non-membrane-bounded organelle;intracellular organelle;intracellular organelle part;intracellular part;macromolecular complex;membrane;non-membrane-bounded organelle;nuclear part;nucleoplasm;organelle;organelle part;ribonucleoprotein complex;RNA granule;stress granule		DUF1897;KH_1	9	9	8	15.9	15.9	13.6	73.027	44.852	1513900000	752380000	761570000	1.67359	0.426254	0.833677	0.401242	1.50107	0.367377	0.0875325	-0.042498	A0A087WTP3;Q92945;M0R0I5;M0QYH3;M0QXW7;M0R251;M0QYG1;M0R263;M0R0C6;M0R3J3	A0A087WTP3;Q92945;M0R0I5	Far upstream element-binding protein 2	KHSRP
NaN	NaN	NaN	NaN	NaN	NaN	0.0980152	NaN	NaN	NaN	NaN	NaN					biological regulation;cellular process;cellular response to stimulus;intracellular signal transduction;regulation of biological process;regulation of cellular process;regulation of response to stimulus;regulation of signal transduction;regulation of signaling;regulation of small GTPase mediated signal transduction;response to stimulus;signal transduction;small GTPase mediated signal transduction	enzyme activator activity;enzyme regulator activity;GTPase activator activity;GTPase regulator activity;nucleoside-triphosphatase regulator activity	cell part;cytoplasmic part;cytosol;extracellular membrane-bounded organelle;extracellular organelle;extracellular region part;extracellular vesicular exosome;intracellular;intracellular part;membrane-bounded organelle;membrane-bounded vesicle;organelle;vesicle		PDZ;RhoGAP	1	1	1	8.8	8.8	8.8	15.451	4.3793	20442000	13108000	7333400	0	NaN	0	NaN	0	-0.00198479	0	NaN	A0A087WTU4;Q9P227-2;Q9P227	A0A087WTU4;Q9P227-2;Q9P227	Rho GTPase-activating protein 23	ARHGAP23
NaN	NaN	NaN	NaN	NaN	NaN	NaN	NaN	NaN	NaN	NaN	NaN					amine biosynthetic process;amine metabolic process;biosynthetic process;carboxylic acid biosynthetic process;carboxylic acid metabolic process;cellular amine metabolic process;cellular amino acid biosynthetic process;cellular amino acid metabolic process;cellular biosynthetic process;cellular ketone metabolic process;cellular metabolic process;cellular nitrogen compound biosynthetic process;cellu…	catalytic activity;oxidoreductase activity;oxidoreductase activity, acting on the CH-NH group of donors;oxidoreductase activity, acting on the CH-NH group of donors, NAD or NADP as acceptor;pyrroline-5-carboxylate reductase activity	cell part;cytoplasm;intracellular part	Arginine and proline metabolism	F420_oxidored;P5CR_dimer	2	1	1	11.8	6.5	6.5	25.868	6.9549	15369000	15369000	0	0	NaN	0	NaN	0	NaN	0	NaN	A0A087WTV6;J3KR12;Q96C36;A0A087WZR9	A0A087WTV6;J3KR12;Q96C36;A0A087WZR9	Pyrroline-5-carboxylate reductase 2;Pyrroline-5-carboxylate reductase	PYCR2
0.706287	0.679334	0.77349	0.273456	0.240864	0.0285691	NaN	NaN	NaN	-0.218733	-0.394202	-0.304505	+				biological regulation;biosynthetic process;cell cycle;cell proliferation;cellular biosynthetic process;cellular component organization;cellular component organization at cellular level;cellular component organization or biogenesis;cellular component organization or biogenesis at cellular level;cellular macromolecule biosynthetic process;cellular macromolecule metabolic process;cellular metabolic …	acid-amino acid ligase activity;binding;catalytic activity;cation binding;chromatin binding;core promoter proximal region DNA binding;core promoter proximal region sequence-specific DNA binding;DNA binding;histone binding;identical protein binding;ion binding;ligase activity;ligase activity, forming carbon-nitrogen bonds;metal ion binding;methylated histone residue binding;methyl-CpG binding;nucl…	cell part;chromatin;chromosomal part;euchromatin;heterochromatin;intracellular membrane-bounded organelle;intracellular organelle;intracellular organelle part;intracellular part;membrane-bounded organelle;nuclear chromatin;nuclear chromosome part;nuclear heterochromatin;nuclear matrix;nuclear part;nucleus;organelle;organelle part;replication fork		DUF3590;PHD;SAD_SRA;ubiquitin	19	19	19	29.3	29.3	29.3	91.099	116.97	2677000000	1588900000	1088100000	2.6915	0.619704	0.395534	0.080963	0	NaN	1.81737	-0.405813	A0A087WVR3;A0A087WTW0;Q96T88;Q96T88-2;A0A087WWG9;Q96PU4	A0A087WVR3;A0A087WTW0;Q96T88;Q96T88-2;A0A087WWG9	E3 ubiquitin-protein ligase UHRF1	UHRF1
NaN	NaN	NaN	NaN	NaN	NaN	NaN	NaN	NaN	NaN	NaN	NaN					biological regulation;catabolic process;cellular catabolic process;cellular macromolecule catabolic process;cellular macromolecule metabolic process;cellular metabolic process;cellular process;macromolecule catabolic process;macromolecule metabolic process;metabolic process;modification-dependent macromolecule catabolic process;modification-dependent protein catabolic process;negative regulation …	ATPase binding;binding;enzyme binding;K6-linked polyubiquitin binding;polyubiquitin binding;protein binding;small conjugating protein binding;ubiquitin binding;ubiquitin protein ligase binding	Cdc48p-Npl4p-Ufd1p AAA ATPase complex;cell body;cell part;cell projection;cytoplasm;cytoplasmic part;dendrite;endoplasmic reticulum part;intracellular membrane-bounded organelle;intracellular organelle;intracellular organelle part;intracellular part;macromolecular complex;membrane part;membrane-bounded organelle;neuron projection;neuronal cell body;nucleus;organelle;organelle part;protein complex		UBA;UBX	1	1	1	6.7	6.7	6.7	27.015	4.423	2134800	0	2134800	0	NaN	0	NaN	0	NaN	0	NaN	A0A087WTZ5;E9PJ81;E9PRQ7;Q04323;Q04323-2	A0A087WTZ5;E9PJ81;E9PRQ7;Q04323;Q04323-2	UBX domain-containing protein 1	UBXN1
NaN	NaN	NaN	1.12704	NaN	NaN	NaN	-2.1941	NaN	NaN	NaN	NaN					carbohydrate metabolic process;cation transport;cellular carbohydrate metabolic process;cellular macromolecule metabolic process;cellular metabolic process;cellular process;cellular protein metabolic process;cognition;divalent inorganic cation transport;divalent metal ion transport;establishment of localization;glycosylation;ion transport;macromolecule glycosylation;macromolecule metabolic proces…	cation transmembrane transporter activity;divalent inorganic cation transmembrane transporter activity;inorganic cation transmembrane transporter activity;ion transmembrane transporter activity;magnesium ion transmembrane transporter activity;metal ion transmembrane transporter activity;substrate-specific transmembrane transporter activity;substrate-specific transporter activity;transmembrane tra…	cell part;cytoplasmic part;endoplasmic reticulum part;integral to membrane;integral to plasma membrane;intracellular organelle part;intracellular part;intrinsic to membrane;intrinsic to plasma membrane;macromolecular complex;membrane;membrane part;oligosaccharyltransferase complex;organelle part;plasma membrane;plasma membrane part;protein complex		OST3_OST6	3	3	3	7.9	7.9	7.9	41.531	8.2364	853640000	672240000	181400000	0	NaN	0	1.02704	0	-2.2941	0	NaN	A0A087WU53;Q9H0U3;Q9H0U3-2	A0A087WU53;Q9H0U3	Magnesium transporter protein 1	MAGT1
NaN	NaN	NaN	NaN	0.988848	NaN	NaN	NaN	NaN	NaN	NaN	NaN					apoptosis;biological regulation;cell death;cellular macromolecule metabolic process;cellular metabolic process;cellular nitrogen compound metabolic process;cellular process;death;gene expression;immune system process;macromolecule metabolic process;metabolic process;mRNA metabolic process;mRNA processing;nitrogen compound metabolic process;nuclear mRNA splicing, via spliceosome;nucleic acid metab…	binding;enzyme binding;protein binding	cell part;cytoplasm;intracellular membrane-bounded organelle;intracellular organelle;intracellular organelle part;intracellular part;macromolecular complex;membrane;membrane-bounded organelle;nuclear part;nucleoplasm;nucleus;organelle;organelle part;protein complex;Prp19 complex;ribonucleoprotein complex;spliceosomal complex	Spliceosome	CTNNBL	4	4	4	6.7	6.7	6.7	65.702	4.6288	29631000	14700000	14931000	0	NaN	0	0.888848	0	NaN	0	NaN	A0A087WUB9;Q8WYA6-3;Q8WYA6-2;Q8WYA6-4;Q8WYA6	A0A087WUB9;Q8WYA6-3;Q8WYA6-2;Q8WYA6-4;Q8WYA6	Beta-catenin-like protein 1	CTNNBL1
NaN	NaN	NaN	NaN	NaN	NaN	NaN	NaN	NaN	NaN	NaN	NaN					activation of MAPK activity;activation of MAPKK activity;activation of protein kinase activity;aging;amine metabolic process;aminoglycan catabolic process;aminoglycan metabolic process;anatomical structure development;anatomical structure formation involved in morphogenesis;anatomical structure morphogenesis;angiogenesis;angiogenesis involved in coronary vascular morphogenesis;biological regulati…	binding;carbohydrate binding;chemoattractant activity;cytokine activity;fibroblast growth factor receptor binding;glycosaminoglycan binding;growth factor activity;growth factor receptor binding;heparin binding;ligand-dependent nuclear receptor transcription coactivator activity;pattern binding;polysaccharide binding;protein binding;protein binding transcription factor activity;receptor binding;tr…	cell part;cytoplasmic part;cytosol;extracellular region;extracellular region part;extracellular space;intracellular membrane-bounded organelle;intracellular organelle;intracellular part;membrane-bounded organelle;nucleus;organelle	MAPK signaling pathway;Melanoma;Pathways in cancer;Regulation of actin cytoskeleton		3	3	3	7.6	7.6	7.6	30.752	5.1181	66662000	39431000	27231000	0	NaN	0	NaN	0	NaN	0	NaN	A0A087WUF6;P09038-2;P09038-3;P09038-1;P09038	A0A087WUF6;P09038-2;P09038-3;P09038-1;P09038	Fibroblast growth factor;Fibroblast growth factor 2	FGF2
0.0518593	-0.0808506	-0.0551715	0.0207689	-0.00605763	-0.0304276	-0.301959	-0.349162	-0.301266	-0.100082	-0.0762804	-0.124251			+		biological regulation;biosynthetic process;cellular biosynthetic process;cellular macromolecule biosynthetic process;cellular macromolecule metabolic process;cellular metabolic process;cellular nitrogen compound metabolic process;cellular process;macromolecule biosynthetic process;macromolecule metabolic process;metabolic process;nitrogen compound metabolic process;nucleic acid metabolic process;…	binding;DNA binding;double-stranded DNA binding;mRNA binding;nucleic acid binding;nucleotide binding;poly(A) RNA binding;poly(G) RNA binding;poly-purine tract binding;RNA binding;single-stranded DNA binding;single-stranded RNA binding;structure-specific DNA binding	cell part;cytoplasm;extracellular membrane-bounded organelle;extracellular organelle;extracellular region part;extracellular vesicular exosome;intracellular membrane-bounded organelle;intracellular organelle;intracellular organelle part;intracellular part;macromolecular complex;membrane-bounded organelle;membrane-bounded vesicle;nuclear part;nucleoplasm;nucleus;organelle;organelle part;ribonucleo…		RRM_1	25	25	4	57.6	57.6	19	40.04	323.31	105290000000	65159000000	40132000000	1.05714	-0.128054	1.71735	-0.105239	2.84206	-0.417462	2.32327	-0.200205	A0A087WUK2;O14979	A0A087WUK2;O14979	Heterogeneous nuclear ribonucleoprotein D-like	HNRNPDL
NaN	NaN	NaN	NaN	NaN	NaN	NaN	NaN	NaN	NaN	NaN	NaN					acylglycerol metabolic process;aging;amine metabolic process;anatomical structure development;anatomical structure formation involved in morphogenesis;anatomical structure morphogenesis;angiogenesis;angiogenesis involved in wound healing;arachidonic acid metabolic process;biological regulation;blood vessel endothelial cell migration;carboxylic acid metabolic process;catabolic process;cell develop…	amine binding;amino acid binding;antioxidant activity;binding;carboxylic acid binding;catalytic activity;glutathione binding;glutathione peroxidase activity;modified amino acid binding;oxidoreductase activity;oxidoreductase activity, acting on paired donors, with incorporation or reduction of molecular oxygen;oxidoreductase activity, acting on peroxide as acceptor;peptide binding;peroxidase activ…	cell part;cytoplasm;cytoplasmic part;cytosol;extracellular membrane-bounded organelle;extracellular organelle;extracellular region part;extracellular vesicular exosome;intracellular membrane-bounded organelle;intracellular organelle;intracellular organelle lumen;intracellular organelle part;intracellular part;membrane-bounded organelle;membrane-bounded vesicle;membrane-enclosed lumen;mitochondria…	Arachidonic acid metabolism;Glutathione metabolism	GSHPx	1	1	1	6.9	6.9	6.9	21.938	2.389	9193500	0	9193500	0	NaN	0	NaN	0	NaN	0	NaN	A0A087WUQ6;P07203-2;P07203	A0A087WUQ6;P07203-2;P07203	Glutathione peroxidase;Glutathione peroxidase 1	GPX1
-0.220597	-0.257545	-0.296758	-0.186935	-0.343092	-0.391645	-0.127542	-0.0746993	-0.220934	0.0980152	0.152768	0.447949	+				biological regulation;biosynthetic process;catabolic process;cellular biosynthetic process;cellular catabolic process;cellular component biogenesis;cellular component biogenesis at cellular level;cellular component disassembly;cellular component disassembly at cellular level;cellular component organization;cellular component organization at cellular level;cellular component organization or biogen…	binding;nucleotide binding;protein binding;structural constituent of ribosome;structural molecule activity;translation initiation factor binding	cell part;cytoplasm;cytoplasmic part;cytosol;cytosolic small ribosomal subunit;intracellular membrane-bounded organelle;intracellular non-membrane-bounded organelle;intracellular organelle;intracellular organelle part;intracellular part;macromolecular complex;membrane;membrane-bounded organelle;non-membrane-bounded organelle;nuclear part;nucleolus;nucleus;organelle;organelle part;ribonucleoprotei…	Ribosome	Ribosomal_S24e	5	5	5	35.9	35.9	35.9	15.197	26.287	6668600000	4037000000	2631600000	2.42654	-0.3583	1.65298	-0.407224	1.52226	-0.241058	0.46108	0.132911	E7ETK0;A0A087WUS0;P62847-2;P62847-3;P62847;P62847-4	E7ETK0;A0A087WUS0;P62847-2;P62847-3;P62847;P62847-4	40S ribosomal protein S24	RPS24
NaN	NaN	NaN	NaN	NaN	NaN	NaN	NaN	NaN	-0.584934	-0.534203	NaN					biosynthetic process;cell differentiation;cellular biosynthetic process;cellular developmental process;cellular macromolecule biosynthetic process;cellular macromolecule metabolic process;cellular metabolic process;cellular nitrogen compound metabolic process;cellular process;developmental process;macromolecule biosynthetic process;macromolecule metabolic process;metabolic process;muscle cell dif…	binding;DNA binding;nucleic acid binding;nucleotide binding	cell part;cytoplasm;intracellular membrane-bounded organelle;intracellular organelle;intracellular organelle part;intracellular part;membrane-bounded organelle;nuclear part;nucleoplasm;nucleus;organelle;organelle part		RRM_1	6	6	6	10.6	10.6	10.6	58.685	7.5409	78328000	50020000	28307000	0	NaN	0	NaN	0	NaN	1.61135	-0.659568	A0A087WUT0;A0A0A0MQW0;A0A0A0MR39;Q9P2K5-2;Q9P2K5;H0YN19;H0YKS1;A0A0C4DGV1;Q9P2K5-3	A0A087WUT0;A0A0A0MQW0;A0A0A0MR39;Q9P2K5-2;Q9P2K5;H0YN19;H0YKS1;A0A0C4DGV1;Q9P2K5-3	Myelin expression factor 2	MYEF2
NaN	NaN	NaN	NaN	NaN	NaN	NaN	NaN	NaN	NaN	NaN	NaN					biological regulation;biosynthetic process;cellular biosynthetic process;cellular macromolecule biosynthetic process;cellular macromolecule metabolic process;cellular metabolic process;cellular process;cellular protein metabolic process;gene expression;macromolecule biosynthetic process;macromolecule metabolic process;metabolic process;posttranscriptional regulation of gene expression;primary met…	binding;catalytic activity;GTP binding;GTPase activity;guanyl nucleotide binding;guanyl ribonucleotide binding;hydrolase activity;hydrolase activity, acting on acid anhydrides;hydrolase activity, acting on acid anhydrides, in phosphorus-containing anhydrides;nucleic acid binding;nucleoside-triphosphatase activity;nucleotide binding;purine nucleotide binding;purine ribonucleoside triphosphate bind…	cell part;cytoplasm;cytoplasmic part;cytosol;intracellular part	RNA transport	GTP_EFTU;GTP_EFTU_D2;GTP_EFTU_D4;IF-2	2	2	2	3.3	3.3	3.3	138.68	4.6134	53140000	30877000	22263000	0	NaN	0	NaN	0	NaN	0	NaN	A0A087WUT6;O60841	A0A087WUT6;O60841	Eukaryotic translation initiation factor 5B	EIF5B
NaN	NaN	NaN	NaN	NaN	NaN	NaN	NaN	NaN	NaN	NaN	NaN							cell part;cytoplasmic part;integral to membrane;intracellular organelle part;intracellular part;intrinsic to membrane;membrane;membrane part;mitochondrial inner membrane;mitochondrial membrane;mitochondrial part;organelle inner membrane;organelle membrane;organelle part		ApoO	3	3	3	17.1	17.1	17.1	28.761	14.976	220750000	5103600	215650000	0	NaN	0	NaN	0	NaN	0	NaN	A0A087WUX8;A0A087WYF7;Q6UXV4	A0A087WUX8;A0A087WYF7;Q6UXV4	MICOS complex subunit MIC27	APOOL
-0.981765	-0.958673	-1.25808	-0.139649	-0.713497	-0.510169	NaN	0.595026	0.883386	-1.16175	-0.752073	NaN					biological regulation;cell junction assembly;cell junction organization;cell-cell junction assembly;cell-cell junction organization;cellular component assembly;cellular component assembly at cellular level;cellular component organization;cellular component organization at cellular level;cellular component organization or biogenesis;cellular component organization or biogenesis at cellular level;c…		apical plasma membrane;cell junction;cell part;cell-cell junction;cytoplasmic part;extracellular membrane-bounded organelle;extracellular organelle;extracellular region part;extracellular vesicular exosome;intracellular part;macromolecular complex;membrane;membrane part;membrane-bounded organelle;membrane-bounded vesicle;occluding junction;organelle;perinuclear region of cytoplasm;plasma membrane…	Tight junction	L27_2;PDZ	4	4	4	4.6	4.6	4.6	130.08	7.7371	4611400000	3416300000	1195100000	2.17172	-1.16617	1.09246	-0.554439	0.850064	0.639206	0.914097	-1.05691	A0A087WUZ6;Q8NI35-4;Q8NI35-3;Q8NI35-2;Q8NI35;Q8NI35-5;A0A0U1RR46	A0A087WUZ6;Q8NI35-4;Q8NI35-3;Q8NI35-2;Q8NI35;Q8NI35-5	InaD-like protein	INADL
NaN	NaN	NaN	NaN	NaN	NaN	NaN	NaN	NaN	NaN	NaN	NaN					biological regulation;cell redox homeostasis;cellular component organization;cellular component organization or biogenesis;cellular homeostasis;cellular process;homeostatic process;positive regulation of catalytic activity;positive regulation of GTPase activity;positive regulation of hydrolase activity;positive regulation of molecular function;regulation of actin cytoskeleton organization;regulat…	binding;catalytic activity;disulfide oxidoreductase activity;electron carrier activity;enzyme activator activity;enzyme regulator activity;GTPase activator activity;GTPase regulator activity;nucleoside-triphosphatase regulator activity;oxidoreductase activity;oxidoreductase activity, acting on a sulfur group of donors;protein binding;protein disulfide oxidoreductase activity;receptor binding;sema…	cell part;cell projection;cytoplasm;extracellular membrane-bounded organelle;extracellular organelle;extracellular region part;extracellular vesicular exosome;intracellular membrane-bounded organelle;intracellular organelle;intracellular part;lamellipodium;membrane-bounded organelle;membrane-bounded vesicle;nucleus;organelle;vesicle		SH3BGR	1	1	1	21.6	21.6	21.6	9.3804	3.7389	46466000	46466000	0	0	NaN	0	NaN	0	NaN	0	NaN	Q5T123;A0A087WV23;Q9H299	Q5T123;A0A087WV23;Q9H299	SH3 domain-binding glutamic acid-rich-like protein 3	SH3BGRL3
NaN	NaN	NaN	NaN	NaN	NaN	NaN	NaN	NaN	NaN	NaN	NaN							extracellular region part;extracellular space	Salivary secretion	Pro-rich	1	1	1	10.7	10.7	10.7	14.001	5.7841	76783000	76783000	0	0	NaN	0	NaN	0	NaN	0	NaN	A0A087WYF5;A0A0A0MT31;A0A087WYT0;A0A087WV42;A0A087WZY1;P02810	A0A087WYF5;A0A0A0MT31;A0A087WYT0;A0A087WV42;A0A087WZY1;P02810	Salivary acidic proline-rich phosphoprotein 1/2;Salivary acidic proline-rich phosphoprotein 1/2;Salivary acidic proline-rich phosphoprotein 3/4;Peptide P-C	PRH1
NaN	NaN	NaN	NaN	NaN	NaN	NaN	NaN	2.13346	NaN	NaN	NaN					biological regulation;cellular component organization;cellular component organization or biogenesis;cellular process;cellular response to acid;cellular response to amine stimulus;cellular response to amino acid stimulus;cellular response to chemical stimulus;cellular response to endogenous stimulus;cellular response to organic nitrogen;cellular response to organic substance;cellular response to s…		cell part;cytoplasmic part;endosomal part;intracellular membrane-bounded organelle;intracellular organelle;intracellular organelle part;intracellular part;lysosome;lytic vacuole;macromolecular complex;membrane part;membrane-bounded organelle;organelle;organelle part;protein complex;Ragulator complex;vacuole			1	1	1	12.2	12.2	12.2	8.8779	3.6375	110350000	18093000	92254000	0	NaN	0	NaN	0	2.03346	0	NaN	A0A087WV46;C9JXA7;Q0VGL1	A0A087WV46;C9JXA7;Q0VGL1	Ragulator complex protein LAMTOR4;Ragulator complex protein LAMTOR4, N-terminally processed	LAMTOR4
NaN	NaN	NaN	NaN	NaN	NaN	NaN	NaN	NaN	NaN	-0.282053	NaN					activation of immune response;biological regulation;complement activation;complement activation, classical pathway;defense response;humoral immune response;immune effector process;immune response;immune system process;innate immune response;macromolecule metabolic process;metabolic process;positive regulation of biological process;positive regulation of immune response;positive regulation of immu…	antigen binding;binding	blood microparticle;extracellular membrane-bounded organelle;extracellular organelle;extracellular region;extracellular region part;extracellular space;extracellular vesicular exosome;membrane-bounded organelle;membrane-bounded vesicle;organelle;vesicle		C1-set;V-set	7	7	4	17.8	17.8	13.3	51.153	14.033	1598400000	1588500000	9910100	0	NaN	0	NaN	0	NaN	0	-0.382053	A0A087WV47;A0A087X079;A0A0G2JNK4;A0A0A0MS08;A0A087X1C7;A0A087WYC5;P01857;A0A0A0MS07;A0A0G2JPD4;A0A075B6N8;A0A087WXL8;A0A087WVW2;P01861;P01860	A0A087WV47;A0A087X079;A0A0G2JNK4;A0A0A0MS08;A0A087X1C7;A0A087WYC5;P01857;A0A0A0MS07	Ig gamma-1 chain C region	IGHG1
NaN	NaN	NaN	NaN	NaN	NaN	NaN	NaN	0.590913	NaN	NaN	NaN					apoptosis;biosynthetic process;cell death;cellular biosynthetic process;cellular component disassembly;cellular component disassembly at cellular level;cellular component organization;cellular component organization at cellular level;cellular component organization or biogenesis;cellular component organization or biogenesis at cellular level;cellular macromolecular complex disassembly;cellular ma…	structural constituent of ribosome;structural molecule activity	cell part;cytoplasmic part;intracellular membrane-bounded organelle;intracellular non-membrane-bounded organelle;intracellular organelle;intracellular organelle part;intracellular part;macromolecular complex;membrane;membrane-bounded organelle;mitochondrial inner membrane;mitochondrial membrane;mitochondrial part;mitochondrion;non-membrane-bounded organelle;organelle;organelle inner membrane;orga…		PDCD9	2	2	2	9.5	9.5	9.5	38.893	19.929	87606000	45555000	42051000	0	NaN	0	NaN	0	0.490913	0	NaN	A0A087WV52;Q9NP92	A0A087WV52;Q9NP92	28S ribosomal protein S30, mitochondrial	MRPS30
0.939302	0.955238	1.0031	0.225028	0.216362	0.338453	NaN	NaN	NaN	-0.195748	-0.480639	-0.137521	+				cell cycle phase;cell cycle process;cell proliferation;cellular process;meiosis	adenyl nucleotide binding;adenyl ribonucleotide binding;ATP binding;binding;nucleotide binding;protein binding;protein C-terminus binding;purine nucleotide binding;purine ribonucleoside triphosphate binding;purine ribonucleotide binding;ribonucleotide binding	cell part;chromosomal part;chromosome;chromosome, centromeric region;condensed chromosome;cytoplasm;intracellular membrane-bounded organelle;intracellular non-membrane-bounded organelle;intracellular organelle;intracellular organelle part;intracellular part;membrane;membrane-bounded organelle;non-membrane-bounded organelle;nuclear part;nucleolus;nucleus;organelle;organelle part		FHA;K167R;PP1_bind	70	70	70	30.4	30.4	30.4	358.62	323.31	8332700000	4237100000	4095600000	3.31	0.86588	1.25582	0.159948	0	NaN	1.13827	-0.371303	A0A087WV66;P46013;P46013-2	A0A087WV66;P46013;P46013-2	Antigen KI-67	MKI67
NaN	NaN	NaN	2.49552	NaN	NaN	NaN	NaN	NaN	NaN	NaN	NaN					biosynthetic process;carbohydrate biosynthetic process;carbohydrate metabolic process;cellular macromolecule metabolic process;cellular metabolic process;cellular process;cellular protein metabolic process;dolichol-linked oligosaccharide biosynthetic process;establishment of localization;macromolecule metabolic process;metabolic process;oligosaccharide biosynthetic process;oligosaccharide metabol…		cell part;cytoplasmic part;endoplasmic reticulum;endoplasmic reticulum membrane;endoplasmic reticulum part;extracellular membrane-bounded organelle;extracellular organelle;extracellular region part;extracellular vesicular exosome;integral to membrane;intracellular membrane-bounded organelle;intracellular organelle;intracellular organelle part;intracellular part;intrinsic to membrane;membrane;memb…		PQ-loop	2	2	2	38.5	38.5	38.5	5.7856	3.3434	189950000	77271000	112680000	0	NaN	0	2.39552	0	NaN	0	NaN	J3KSI4;I3L1D2;I3L4E0;J3QS48;I3L295;J3KT75;J3QW43;J3QRD5;Q9H3L2;Q1HDL3;A0A087WV81;O75352-2;O75352;I3L405;I3L261;J3KTK8;J3QQZ4	J3KSI4;I3L1D2;I3L4E0;J3QS48;I3L295;J3KT75;J3QW43;J3QRD5;Q9H3L2;Q1HDL3;A0A087WV81;O75352-2;O75352;I3L405;I3L261;J3KTK8;J3QQZ4	Mannose-P-dolichol utilization defect 1 protein	MPDU1;HBEBP2BPA
NaN	NaN	NaN	6.31933	2.51728	3.8024	NaN	NaN	NaN	NaN	NaN	NaN					biological regulation;cellular lipid metabolic process;cellular metabolic process;cellular process;cellular response to stimulus;lipid metabolic process;membrane lipid metabolic process;metabolic process;primary metabolic process;regulation of biological process;regulation of cellular process;response to stimulus;signal transduction;sphingolipid metabolic process		cell part;integral to membrane;intrinsic to membrane;membrane;membrane part		DUF2404	16	16	16	18.6	18.6	18.6	125.38	46.518	710060000	39170000	670890000	0	NaN	1.17757	4.113	0	NaN	0	NaN	A0A087WVA8;Q8IWB9;Q8IWB9-2;J3KRZ8	A0A087WVA8;Q8IWB9;Q8IWB9-2;J3KRZ8	Testis-expressed sequence 2 protein	TEX2
NaN	NaN	NaN	NaN	NaN	NaN	NaN	NaN	0.453122	NaN	NaN	NaN						binding;cation binding;ion binding;metal ion binding;transition metal ion binding;zinc ion binding	actin cytoskeleton;actin filament bundle;actomyosin;adherens junction;anchoring junction;cell cortex part;cell junction;cell part;cell-substrate adherens junction;cell-substrate junction;cortical actin cytoskeleton;cortical cytoskeleton;cytoplasmic part;cytoskeletal part;cytoskeleton;extracellular membrane-bounded organelle;extracellular organelle;extracellular region part;extracellular vesicular…		LIM;PDZ	3	3	3	14.2	14.2	14.2	34.767	8.8317	49817000	31443000	18374000	0	NaN	0	NaN	0	0.353122	0	NaN	A0A087WVI1;Q96JY6;Q96JY6-3;C9J760;C9J0X3;C9K0F0;C9JSR2;C9JS55;Q96JY6-2;Q96JY6-4;Q96JY6-5;A0A087WU48;F8WFB8;E5RGS7;A0A087WXJ0;H0YBP7;B3KPU0	A0A087WVI1;Q96JY6;Q96JY6-3;C9J760;C9J0X3;C9K0F0;C9JSR2;C9JS55;Q96JY6-2;Q96JY6-4;Q96JY6-5	PDZ and LIM domain protein 2	PDLIM2
NaN	1.9816	NaN	3.28197	1.77838	NaN	2.24857	2.27983	2.39523	NaN	NaN	NaN			+		aromatic compound biosynthetic process;biosynthetic process;carboxylic acid metabolic process;cellular aromatic compound metabolic process;cellular biosynthetic process;cellular ketone metabolic process;cellular metabolic process;cellular nitrogen compound biosynthetic process;cellular nitrogen compound metabolic process;cellular process;coenzyme biosynthetic process;coenzyme metabolic process;co…	adenyl nucleotide binding;adenyl ribonucleotide binding;ATP binding;binding;catalytic activity;formate-tetrahydrofolate ligase activity;identical protein binding;ligase activity;ligase activity, forming carbon-nitrogen bonds;methylenetetrahydrofolate dehydrogenase (NADP+) activity;nucleotide binding;oxidoreductase activity;oxidoreductase activity, acting on the CH-NH group of donors;oxidoreductas…	cell part;cytoplasmic part;intracellular membrane-bounded organelle;intracellular organelle;intracellular part;membrane;membrane-bounded organelle;mitochondrion;organelle	One carbon pool by folate	FTHFS;THF_DHG_CYH;THF_DHG_CYH_C	9	9	9	12.6	12.6	12.6	99.31	42.901	1049500000	454450000	595050000	0	1.8816	0.718969	2.43017	3.38955	2.20787	0	NaN	A0A087WVM4;B7ZM99;Q6UB35;H0Y327;Q4VXM1;Q4VXM0;Q6UB35-2	A0A087WVM4;B7ZM99;Q6UB35	Monofunctional C1-tetrahydrofolate synthase, mitochondrial	MTHFD1L
NaN	NaN	NaN	NaN	NaN	NaN	0.496513	NaN	NaN	NaN	NaN	NaN					actin cytoskeleton organization;actin filament organization;actin filament-based process;anatomical structure morphogenesis;biological adhesion;cell adhesion;cell communication;cell migration;cell motility;cell-cell adhesion;cell-cell signaling;cellular component movement;cellular component organization;cellular component organization at cellular level;cellular component organization or biogenesi…	binding;calcium ion binding;cation binding;ion binding;metal ion binding	adherens junction;anchoring junction;cell junction;cell part;cell projection;cell-cell junction;cell-substrate adherens junction;cell-substrate junction;cytoplasmic part;extracellular membrane-bounded organelle;extracellular organelle;extracellular region part;extracellular vesicular exosome;filopodium;focal adhesion;integral to membrane;integral to plasma membrane;intracellular membrane-bounded …		Cadherin;EGF;EGF_CA;Laminin_G_2	3	3	3	0.8	0.8	0.8	506.37	3.3438	213560000	191760000	21794000	0	NaN	0	NaN	0	0.396513	0	NaN	A0A087WVP1;Q14517	A0A087WVP1;Q14517	Protocadherin Fat 1;Protocadherin Fat 1, nuclear form	FAT1
0.225892	0.311736	0.266517	-0.135903	0.0194884	-0.112334	-0.329051	-0.167766	-0.300448	0.127105	0.559639	0.523462					antigen processing and presentation;antigen processing and presentation of exogenous antigen;antigen processing and presentation of exogenous peptide antigen;antigen processing and presentation of exogenous peptide antigen via MHC class II;antigen processing and presentation of peptide antigen;antigen processing and presentation of peptide antigen via MHC class II;antigen processing and presentat…	binding;clathrin binding;clathrin light chain binding;double-stranded RNA binding;enzyme binding;kinase binding;nucleic acid binding;protein binding;protein kinase binding;RNA binding;structural molecule activity	adherens junction;anchoring junction;cell junction;cell part;cell-substrate adherens junction;cell-substrate junction;clathrin coat;clathrin coat of coated pit;clathrin coat of trans-Golgi network vesicle;clathrin coated vesicle membrane;clathrin complex;clathrin vesicle coat;clathrin-coated endocytic vesicle membrane;clathrin-coated vesicle;coated vesicle;coated vesicle membrane;cytoplasm;cytopl…	Bacterial invasion of epithelial cells;Endocrine and other factor-regulated calcium reabsorption;Endocytosis;Huntington's disease;Lysosome	Clathrin;Clathrin_propel;Clathrin-link	72	72	72	52.2	52.2	52.2	192.06	323.31	31572000000	19769000000	11803000000	1.67612	0.168048	1.1694	-0.17625	1.74575	-0.365755	0.796049	0.303402	A0A087WVQ6;Q00610-2;Q00610;J3KS13;A0A087WX41;P53675-2;P53675;K7EJJ5;J3KSQ2;J3QL20;J3KRF5;F5H5N6	A0A087WVQ6;Q00610-2;Q00610	Clathrin heavy chain;Clathrin heavy chain 1	CLTC
NaN	NaN	NaN	NaN	NaN	NaN	NaN	NaN	NaN	NaN	NaN	NaN					cellular process;establishment of localization;establishment of localization in cell;exocytosis;secretion;secretion by cell;transport;vesicle-mediated transport	catalytic activity;dipeptidase activity;exopeptidase activity;hydrolase activity;peptidase activity;peptidase activity, acting on L-amino acid peptides			Peptidase_C69	1	1	1	3.5	3.5	3.5	49.154	3.4562	5438600	5438600	0	0	NaN	0	NaN	0	NaN	0	NaN	A0A087WW14;Q0VDG4-2;Q0VDG4	A0A087WW14;Q0VDG4-2;Q0VDG4	Secernin-3	SCRN3
NaN	NaN	NaN	NaN	NaN	NaN	NaN	NaN	NaN	NaN	NaN	NaN					activation of immune response;activation of innate immune response;anaphase-promoting complex-dependent proteasomal ubiquitin-dependent protein catabolic process;antigen processing and presentation;antigen processing and presentation of exogenous antigen;antigen processing and presentation of exogenous peptide antigen;antigen processing and presentation of exogenous peptide antigen via MHC class …	enzyme regulator activity	cell part;cytoplasmic part;cytosol;extracellular membrane-bounded organelle;extracellular organelle;extracellular region part;extracellular vesicular exosome;intracellular organelle part;intracellular part;macromolecular complex;membrane;membrane-bounded organelle;membrane-bounded vesicle;nuclear part;nucleoplasm;organelle;organelle part;proteasome accessory complex;proteasome complex;proteasome …	Proteasome	PC_rep	2	2	2	17.2	17.2	17.2	20.317	13.026	40444000	5730800	34714000	0	NaN	0	NaN	0	NaN	0	NaN	H7C378;A0A087WW66;Q99460-2;Q99460	H7C378;A0A087WW66;Q99460-2;Q99460	26S proteasome non-ATPase regulatory subunit 1	PSMD1
NaN	NaN	NaN	NaN	NaN	NaN	0.537843	0.174279	0.348799	NaN	NaN	NaN					biological regulation;cellular component movement;cellular component organization;cellular component organization at cellular level;cellular component organization or biogenesis;cellular component organization or biogenesis at cellular level;cellular process;cellular response to stimulus;cytoskeleton-dependent intracellular transport;establishment of Golgi localization;establishment of localizati…	enzyme activator activity;enzyme regulator activity;GTPase activator activity;GTPase regulator activity;nucleoside-triphosphatase regulator activity	cell junction;cell part;cytoplasmic part;cytoplasmic vesicle membrane;cytoplasmic vesicle part;cytoskeleton;Golgi apparatus;Golgi apparatus part;Golgi membrane;intracellular;intracellular membrane-bounded organelle;intracellular non-membrane-bounded organelle;intracellular organelle;intracellular organelle part;intracellular part;membrane;membrane-bounded organelle;non-membrane-bounded organelle;…		PDZ;PH;RhoGAP	7	7	7	5	5	5	155.98	14.997	204320000	115580000	88736000	0	NaN	0	NaN	0.863364	0.25364	0	NaN	A0A087WW76;Q5T5U3;Q5JSD8;E7ESW5;F8W9U9;Q5T5U3-3;H0Y468	A0A087WW76;Q5T5U3	Rho GTPase-activating protein 21	ARHGAP21
NaN	NaN	NaN	NaN	NaN	NaN	NaN	NaN	NaN	NaN	NaN	NaN					actin cytoskeleton organization;actin filament-based process;anatomical structure morphogenesis;axonogenesis;biological regulation;cell part morphogenesis;cell projection morphogenesis;cell projection organization;cellular component assembly;cellular component morphogenesis;cellular component organization;cellular component organization at cellular level;cellular component organization or biogene…	binding;enzyme activator activity;enzyme binding;enzyme regulator activity;GTPase activator activity;GTPase regulator activity;kinase binding;nucleoside-triphosphatase regulator activity;protein binding;protein kinase binding;structural molecule activity	axon;cell cortex part;cell part;cell projection;cortical actin cytoskeleton;cortical cytoskeleton;cytoplasm;cytoplasmic part;cytoskeletal part;cytoskeleton;early endosome membrane;endosomal part;endosome membrane;Golgi apparatus part;Golgi cis cisterna;Golgi cisterna;Golgi membrane;intracellular non-membrane-bounded organelle;intracellular organelle;intracellular organelle part;intracellular part…	Tight junction	LLGL	1	1	1	1.1	1.1	1.1	114.43	3.1359	13140000	3617400	9523000	0	NaN	0	NaN	0	NaN	0	NaN	A0A087WW77;Q15334	A0A087WW77;Q15334	Lethal(2) giant larvae protein homolog 1	LLGL1
NaN	NaN	NaN	NaN	NaN	NaN	NaN	NaN	NaN	NaN	NaN	NaN					anterograde axon cargo transport;apoptosis;axon cargo transport;cell communication;cell death;cell-cell signaling;cellular component movement;cellular process;cytoskeleton-dependent intracellular transport;death;establishment of localization;establishment of localization in cell;establishment of mitochondrion localization;establishment of mitochondrion localization, microtubule-mediated;establish…	adenyl nucleotide binding;adenyl ribonucleotide binding;ATP binding;ATPase activity;binding;catalytic activity;cytoskeletal protein binding;hydrolase activity;hydrolase activity, acting on acid anhydrides;hydrolase activity, acting on acid anhydrides, in phosphorus-containing anhydrides;kinesin binding;microtubule motor activity;motor activity;nucleoside-triphosphatase activity;nucleotide binding…	cell body;cell part;cell projection;cytoplasm;cytoplasmic part;cytoplasmic vesicle;cytoplasmic vesicle membrane;cytoplasmic vesicle part;cytoskeletal part;intracellular membrane-bounded organelle;intracellular organelle;intracellular organelle part;intracellular part;kinesin complex;macromolecular complex;membrane;membrane-bounded organelle;microtubule;microtubule associated complex;mitochondrion…		DUF3694;FHA;KIF1B;Kinesin;PH	3	3	3	1.4	1.4	1.4	202.01	2.5547	48335000	2300500	46034000	0	NaN	0	NaN	0	NaN	0	NaN	A0A087WWA3;Q4R9M9;O60333-3;O60333-2;O60333;O60333-4;F8W8V9;Q12756;Q12756-3;Q12756-2;H7C0K6;O43896	A0A087WWA3;Q4R9M9;O60333-3;O60333-2;O60333;O60333-4;F8W8V9;Q12756;Q12756-3;Q12756-2	Kinesin-like protein;Kinesin-like protein KIF1B;Kinesin-like protein KIF1A	KIF1B;KIF1Bbeta;KIF1A
NaN	NaN	NaN	NaN	NaN	NaN	NaN	NaN	NaN	NaN	NaN	NaN					biological regulation;cellular component organization;cellular component organization or biogenesis;cellular macromolecule metabolic process;cellular membrane organization;cellular metabolic process;cellular process;cellular protein metabolic process;cellular response to chemical stimulus;cellular response to hypoxia;cellular response to organic substance;cellular response to oxygen levels;cellul…	adenyl nucleotide binding;adenyl ribonucleotide binding;ATP binding;binding;chaperone binding;nucleotide binding;protein binding;purine nucleotide binding;purine ribonucleoside triphosphate binding;purine ribonucleotide binding;ribonucleotide binding	adherens junction;anchoring junction;cell junction;cell part;cell-substrate adherens junction;cell-substrate junction;cytoplasmic membrane-bounded vesicle lumen;cytoplasmic part;cytoplasmic vesicle part;endocytic vesicle lumen;endoplasmic reticulum;endoplasmic reticulum lumen;endoplasmic reticulum part;extracellular membrane-bounded organelle;extracellular organelle;extracellular region;extracell…	Protein processing in endoplasmic reticulum	HSP70	1	1	1	5.5	5.5	5.5	72.976	20.527	57221000	57221000	0	0	NaN	0	NaN	0	NaN	0	NaN	E9PJ21;A0A087WWI4;K7EQK2;A0A087X054;Q9Y4L1-2;Q9Y4L1	E9PJ21;A0A087WWI4;K7EQK2;A0A087X054;Q9Y4L1-2;Q9Y4L1	Hypoxia up-regulated protein 1	HYOU1
NaN	NaN	NaN	NaN	NaN	NaN	NaN	NaN	1.77053	NaN	NaN	NaN					cellular process;ER to Golgi vesicle-mediated transport;establishment of localization;establishment of localization in cell;Golgi vesicle transport;intracellular transport;transport;vesicle-mediated transport		cell part;cytoplasmic part;cytosol;endoplasmic reticulum;Golgi apparatus;Golgi apparatus part;Golgi membrane;intracellular membrane-bounded organelle;intracellular organelle;intracellular organelle part;intracellular part;macromolecular complex;membrane;membrane-bounded organelle;organelle;organelle membrane;organelle part;protein complex;TRAPP complex		TRAPP	2	2	2	10.1	10.1	10.1	21.231	3.2602	22318000	7515300	14803000	0	NaN	0	NaN	0	1.67053	0	NaN	A0A087WWM0;O43617-2;O43617;A0A087WYS5;A6NKE1	A0A087WWM0;O43617-2;O43617;A0A087WYS5;A6NKE1	Trafficking protein particle complex subunit 3	TRAPPC3
0.198243	0.424815	0.413161	1.79219	2.14819	1.75489	NaN	NaN	NaN	0.100978	-0.208528	0.228234		+			anatomical structure development;anatomical structure morphogenesis;biological regulation;blood vessel development;branching morphogenesis of a tube;cardiac septum morphogenesis;developmental process;hemopoietic or lymphoid organ development;morphogenesis of a branching epithelium;morphogenesis of a branching structure;morphogenesis of an epithelium;multicellular organismal process;negative regul…	binding;nucleic acid binding;nucleotide binding	cell part;intracellular organelle part;intracellular part;membrane;nuclear membrane;nuclear part;nucleoplasm;organelle membrane;organelle part		RRM_1;SPOC	19	19	18	25.4	25.4	24.7	102.13	121.56	2313400000	859800000	1453600000	1.09966	0.245406	2.31671	1.79842	0	NaN	0.161061	-0.0597721	A0A087WWP4;Q96T37-4;Q96T37-2;Q96T37-3;Q96T37	A0A087WWP4;Q96T37-4;Q96T37-2;Q96T37-3;Q96T37	Putative RNA-binding protein 15	RBM15
0.429964	1.81262	NaN	0.251568	0.489029	0.559639	NaN	NaN	NaN	-0.103426	-0.544372	NaN					apoptosis;biological regulation;biosynthetic process;cell death;cellular biosynthetic process;cellular macromolecule biosynthetic process;cellular macromolecule metabolic process;cellular metabolic process;cellular nitrogen compound metabolic process;cellular process;cellular response to stimulus;cellular response to stress;death;DNA metabolic process;establishment of localization;establishment o…	binding;DNA binding;nucleic acid binding;RNA binding	cell part;cytoplasm;extracellular region part;intercellular bridge;intracellular membrane-bounded organelle;intracellular organelle;intracellular organelle part;intracellular part;macromolecular complex;membrane-bounded organelle;nuclear body;nuclear matrix;nuclear part;nuclear speck;nucleoplasm;nucleoplasm part;nucleus;organelle;organelle part;protein complex;THO complex;THO complex part of tran…	RNA transport;Spliceosome	Death;efThoc1	10	10	10	19.6	19.6	19.6	75.651	45.354	839360000	307110000	532250000	0.421556	1.02129	1.15489	0.333412	0	NaN	0.515237	-0.423899	A0A087WWS1;Q96FV9;Q96FV9-2;J3KT14;R4GMN4;A0A087WY84;J3KRD7;R4GN58;J3QQZ3	A0A087WWS1;Q96FV9	THO complex subunit 1	THOC1
NaN	NaN	NaN	3.06378	3.01662	NaN	NaN	NaN	1.51111	NaN	NaN	NaN		+			cellular metabolic process;cellular process;electron transport chain;generation of precursor metabolites and energy;metabolic process;mitochondrial electron transport, NADH to ubiquinone;oxidation-reduction process;respiratory electron transport chain;response to chemical stimulus;response to drug;response to stimulus;small molecule metabolic process	adenyl nucleotide binding;adenyl ribonucleotide binding;ATP binding;binding;catalytic activity;kinase activity;NADH dehydrogenase (quinone) activity;NADH dehydrogenase (ubiquinone) activity;NADH dehydrogenase activity;nucleobase-containing compound kinase activity;nucleoside kinase activity;nucleotide binding;oxidoreductase activity;oxidoreductase activity, acting on NADH or NADPH;oxidoreductase …	cell part;cytoplasmic part;intracellular organelle lumen;intracellular organelle part;intracellular part;macromolecular complex;membrane;membrane part;membrane-enclosed lumen;mitochondrial inner membrane;mitochondrial matrix;mitochondrial membrane;mitochondrial membrane part;mitochondrial part;mitochondrial respiratory chain complex I;NADH dehydrogenase complex;organelle inner membrane;organelle …	Alzheimer's disease;Huntington's disease;Oxidative phosphorylation;Parkinson's disease	dNK	6	6	6	19.2	19.2	19.2	40.836	59.344	277650000	40745000	236900000	0	NaN	2.29198	2.9402	0	1.41111	0	NaN	A0A087WXC5;E7ESZ7;O95299;O95299-2;Q8N1B9;C9J6X0;H7C2W5;H7C1Y7;H7C2X4	A0A087WXC5;E7ESZ7;O95299;O95299-2;Q8N1B9;C9J6X0	NADH dehydrogenase [ubiquinone] 1 alpha subcomplex subunit 10, mitochondrial	NDUFA10
NaN	NaN	NaN	NaN	NaN	NaN	NaN	NaN	NaN	NaN	NaN	NaN					cell cycle phase;cell cycle process;cell division;cellular component organization;cellular component organization at cellular level;cellular component organization or biogenesis;cellular component organization or biogenesis at cellular level;cellular process;mitosis;nuclear division;organelle fission;organelle organization		cell part;cytoplasm;cytoskeletal part;intracellular organelle part;intracellular part;organelle part;spindle pole		DUF1669	2	2	2	2.8	2.8	2.8	67.664	3.464	28251000	18392000	9859300	0	NaN	0	NaN	0	NaN	0	NaN	A0A087WXK8;Q9H4H8;Q9H4H8-2	A0A087WXK8;Q9H4H8;Q9H4H8-2	Protein FAM83D	FAM83D
NaN	NaN	NaN	NaN	NaN	NaN	NaN	NaN	NaN	NaN	NaN	NaN					cellular macromolecule metabolic process;cellular metabolic process;cellular process;cellular protein metabolic process;'de novo' posttranslational protein folding;'de novo' protein folding;macromolecule metabolic process;metabolic process;primary metabolic process;protein folding;protein metabolic process	binding;selenium binding	cell part;cytoplasmic part;endoplasmic reticulum lumen;endoplasmic reticulum part;extracellular membrane-bounded organelle;extracellular organelle;extracellular region part;extracellular vesicular exosome;intracellular organelle lumen;intracellular organelle part;intracellular part;membrane-bounded organelle;membrane-bounded vesicle;membrane-enclosed lumen;organelle;organelle lumen;organelle part…		Sep15_SelM	1	1	1	13.6	13.6	13.6	10.186	3.1067	7857600	3161800	4695800	0	NaN	0	NaN	0	NaN	0	NaN	A0A0J9YX89;A0A087WXL0;A0A0B4J1T0;A8MZD0;A0A087X1G7;A0A0B4J1S4;O60613-2;O60613	A0A0J9YX89;A0A087WXL0;A0A0B4J1T0;A8MZD0;A0A087X1G7;A0A0B4J1S4;O60613-2;O60613	15 kDa selenoprotein	2016-09-15
-0.227304	-0.312133	-0.388998	-0.536085	-0.362473	-0.495654	-0.270939	-0.210546	-0.28079	0.100709	0.164658	0.230326			+		biosynthetic process;catabolic process;cellular biosynthetic process;cellular catabolic process;cellular component disassembly;cellular component disassembly at cellular level;cellular component organization;cellular component organization at cellular level;cellular component organization or biogenesis;cellular component organization or biogenesis at cellular level;cellular macromolecular complex…	structural constituent of ribosome;structural molecule activity	cell part;cytoplasmic part;cytosol;cytosolic large ribosomal subunit;intracellular membrane-bounded organelle;intracellular organelle;intracellular organelle part;intracellular part;large ribosomal subunit;macromolecular complex;membrane-bounded organelle;nucleus;organelle;organelle part;ribonucleoprotein complex	Ribosome	Ribosomal_L22	11	11	11	60.9	60.9	60.9	19.586	176.07	19746000000	11849000000	7897000000	1.89428	-0.409478	2.06982	-0.564737	2.41755	-0.354092	0.650904	0.0652307	A0A087WXM6;J3QQT2;J3KRX5;A0A0A6YYL6;P18621;P18621-3;J3QLC8;A0A0A0MRF8;P18621-2;J3KRB3;A0A087WWH0;J3QS96;A0A087WY81;J3KSJ0	A0A087WXM6;J3QQT2;J3KRX5;A0A0A6YYL6;P18621;P18621-3;J3QLC8;A0A0A0MRF8;P18621-2;J3KRB3;A0A087WWH0;J3QS96;A0A087WY81	60S ribosomal protein L17	RPL17;RPL17-C18orf32
-0.45184	-0.501014	-0.139856	NaN	1.04117	1.1447	0.0749164	0.0416635	-0.0487107	0.812211	0.562474	NaN					biological regulation;cellular macromolecule metabolic process;cellular metabolic process;cellular nitrogen compound metabolic process;cellular process;humoral immune response;immune response;immune system process;macromolecule metabolic process;metabolic process;mRNA metabolic process;nitrogen compound metabolic process;nucleic acid metabolic process;nucleobase-containing compound metabolic proc…		cell part;cytoplasmic mRNA processing body;cytoplasmic part;intracellular non-membrane-bounded organelle;intracellular organelle;intracellular part;macromolecular complex;non-membrane-bounded organelle;organelle;ribonucleoprotein complex;RNA granule		YTH	8	6	5	15.1	12	10.7	61.163	55.45	1146100000	600860000	545200000	1.26337	-0.464236	1.47941	0.992936	0.766543	-0.0773769	0.874978	0.587343	A0A087WXZ3;Q9Y5A9;Q9Y5A9-2;S4R3V3;S4R3J8	A0A087WXZ3;Q9Y5A9;Q9Y5A9-2	YTH domain-containing family protein 2	YTHDF2
NaN	NaN	NaN	NaN	NaN	NaN	NaN	NaN	NaN	NaN	NaN	NaN					cellular component organization;cellular component organization or biogenesis;cellular process;endosome transport;establishment of localization;establishment of localization in cell;establishment of protein localization;intracellular transport;membrane organization;multivesicular body sorting pathway;non-lytic viral release;non-lytic virus budding;protein transport;release of virus from host;repr…	binding;protein binding;protein C-terminus binding	cell part;cytoplasmic part;cytosol;endosomal part;endosome membrane;extracellular membrane-bounded organelle;extracellular organelle;extracellular region part;extracellular vesicular exosome;intracellular organelle part;intracellular part;membrane;membrane-bounded organelle;membrane-bounded vesicle;organelle;organelle membrane;organelle part;vesicle	Endocytosis		1	1	1	5	5	5	31.102	3.1277	26483000	16681000	9801700	0	NaN	0	NaN	0	NaN	0	NaN	A0A087WY55;Q9NP79	A0A087WY55;Q9NP79	Vacuolar protein sorting-associated protein VTA1 homolog	VTA1
NaN	NaN	NaN	NaN	NaN	0.94718	NaN	NaN	1.45449	NaN	NaN	NaN					activation of immune response;activation of innate immune response;apoptosis;biological regulation;biosynthetic process;BMP signaling pathway;catabolic process;cell death;cell surface receptor linked signaling pathway;cellular biosynthetic process;cellular catabolic process;cellular macromolecule biosynthetic process;cellular macromolecule catabolic process;cellular macromolecule metabolic proces…	acid-amino acid ligase activity;adenyl nucleotide binding;adenyl ribonucleotide binding;ATP binding;binding;catalytic activity;ligase activity;ligase activity, forming carbon-nitrogen bonds;nucleotide binding;purine nucleotide binding;purine ribonucleoside triphosphate binding;purine ribonucleotide binding;ribonucleotide binding;small conjugating protein ligase activity;ubiquitin-protein ligase a…	cell part;cytoplasmic part;cytosol;endosomal part;endosome membrane;extracellular membrane-bounded organelle;extracellular organelle;extracellular region part;extracellular vesicular exosome;intracellular organelle part;intracellular part;macromolecular complex;membrane;membrane-bounded organelle;membrane-bounded vesicle;nuclear part;nucleoplasm;organelle;organelle membrane;organelle part;plasma …	Protein processing in endoplasmic reticulum;Ubiquitin mediated proteolysis	UQ_con	2	2	2	12.2	12.2	12.2	16.817	3.0588	138610000	51026000	87588000	0	NaN	0	0.84718	0	1.35449	0	NaN	A0A087WY85;P61077;P61077-2;P61077-3;D6R9F6;D6R933;D6RGD0;D6R980;D6RAW0;D6RIZ3;D6RA11;D6RFM0;D6RAH7;H9KV45;A0A0A0MQU3;P62837-2;P62837	A0A087WY85;P61077;P61077-2;P61077-3;D6R9F6;D6R933;D6RGD0;D6R980;D6RAW0;D6RIZ3;D6RA11;D6RFM0;D6RAH7;H9KV45;A0A0A0MQU3;P62837-2;P62837	Ubiquitin-conjugating enzyme E2 D3;Ubiquitin-conjugating enzyme E2 D2	UBE2D3;UBE2D2
NaN	NaN	NaN	NaN	NaN	NaN	NaN	NaN	NaN	NaN	NaN	NaN							cell part;cytoplasmic part;endoplasmic reticulum membrane;endoplasmic reticulum part;integral to membrane;intracellular organelle part;intracellular part;intrinsic to membrane;membrane;membrane part;organelle membrane;organelle part		DUF1356	1	1	1	26.2	26.2	26.2	7.2499	2.83	0	0	0	0	NaN	0	NaN	0	NaN	0	NaN	F8W120;F8VWX5;F8VVN7;F8W098;H0YIA4;A0A087WYD4;Q9BVX2-2;Q9BVX2	F8W120;F8VWX5;F8VVN7;F8W098;H0YIA4;A0A087WYD4;Q9BVX2-2;Q9BVX2	Transmembrane protein 106C	TMEM106C
NaN	NaN	NaN	NaN	NaN	NaN	NaN	NaN	NaN	NaN	NaN	NaN					antigen processing and presentation;antigen processing and presentation of endogenous antigen;antigen processing and presentation of endogenous peptide antigen;antigen processing and presentation of endogenous peptide antigen via MHC class I;antigen processing and presentation of endogenous peptide antigen via MHC class I via ER pathway;antigen processing and presentation of endogenous peptide an…	active transmembrane transporter activity;adenyl nucleotide binding;adenyl ribonucleotide binding;ATP binding;ATPase activity;ATPase activity, coupled;ATPase activity, coupled to movement of substances;ATPase activity, coupled to transmembrane movement of substances;binding;catalytic activity;hydrolase activity;hydrolase activity, acting on acid anhydrides;hydrolase activity, acting on acid anhyd…	cell part;cytoplasmic part;endoplasmic reticulum membrane;endoplasmic reticulum part;integral to endoplasmic reticulum membrane;integral to membrane;integral to organelle membrane;intracellular organelle part;intracellular part;intrinsic to endoplasmic reticulum membrane;intrinsic to membrane;intrinsic to organelle membrane;macromolecular complex;membrane;membrane part;MHC class II protein comple…	ABC transporters;Antigen processing and presentation;Phagosome;Primary immunodeficiency	ABC_membrane;ABC_tran;C1-set;MHC_II_beta	3	3	3	3.8	3.8	3.8	77.64	4.0965	96209000	7421600	88787000	0	NaN	0	NaN	0	NaN	0	NaN	A0A0G2JLV0;A0A087WYD6;X5CMH5;E7ENX8;Q03519-2;Q03519	A0A0G2JLV0;A0A087WYD6;X5CMH5;E7ENX8;Q03519-2;Q03519	Antigen peptide transporter 2	TAP2
NaN	NaN	NaN	NaN	NaN	NaN	NaN	NaN	NaN	NaN	NaN	NaN							extracellular region		V-set	1	1	1	9.4	9.4	9.4	12.954	5.3245	257000000	257000000	0	0	NaN	0	NaN	0	NaN	0	NaN	A0A0B4J2B8;A0A087WYE8;A6NJS3	A0A0B4J2B8;A0A087WYE8;A6NJS3	Putative V-set and immunoglobulin domain-containing-like protein IGHV1OR21-1	IGHV1OR15-9;IGHV1OR21-1
NaN	NaN	NaN	NaN	NaN	NaN	NaN	NaN	NaN	NaN	NaN	NaN					alcohol metabolic process;biosynthetic process;carbohydrate biosynthetic process;carbohydrate metabolic process;carboxylic acid biosynthetic process;carboxylic acid metabolic process;cellular biosynthetic process;cellular carbohydrate biosynthetic process;cellular carbohydrate metabolic process;cellular glucan metabolic process;cellular glucuronidation;cellular ketone metabolic process;cellular m…	binding;carbohydrate binding;catalytic activity;cation binding;glucose binding;identical protein binding;ion binding;metal ion binding;monosaccharide binding;nucleotide binding;nucleotidyltransferase activity;protein binding;pyrimidine nucleotide binding;pyrimidine ribonucleotide binding;ribonucleotide binding;sugar binding;transferase activity;transferase activity, transferring phosphorus-contai…	cell part;cytoplasmic part;cytosol;extracellular membrane-bounded organelle;extracellular organelle;extracellular region part;extracellular vesicular exosome;intracellular membrane-bounded organelle;intracellular organelle;intracellular part;membrane-bounded organelle;membrane-bounded vesicle;nucleus;organelle;vesicle	Amino sugar and nucleotide sugar metabolism;Galactose metabolism;Pentose and glucuronate interconversions;Starch and sucrose metabolism	UDPGP	1	1	1	12	12	12	16.929	2.9431	22258000	4341600	17917000	0	NaN	0	NaN	0	NaN	0	NaN	C9JWG0;C9JVG3;C9JQU9;C9JNZ1;A0A087WYS1;E7EUC7;Q16851-2;Q16851	C9JWG0;C9JVG3;C9JQU9;C9JNZ1;A0A087WYS1;E7EUC7;Q16851-2;Q16851	UTP--glucose-1-phosphate uridylyltransferase	UGP2
NaN	NaN	NaN	NaN	NaN	NaN	NaN	NaN	NaN	NaN	NaN	NaN					anatomical structure development;anatomical structure homeostasis;arachidonic acid metabolic process;biological regulation;biosynthetic process;carbohydrate biosynthetic process;carbohydrate metabolic process;carboxylic acid biosynthetic process;carboxylic acid metabolic process;cell proliferation;cellular biosynthetic process;cellular carbohydrate biosynthetic process;cellular carbohydrate metab…	binding;catalytic activity;DNA polymerase activity;intramolecular oxidoreductase activity;isomerase activity;nucleotidyltransferase activity;prostaglandin-E synthase activity;protein binding;RNA-directed DNA polymerase activity;telomerase activity;transferase activity;transferase activity, transferring phosphorus-containing groups;unfolded protein binding	cell part;chromosomal part;chromosome, telomeric region;cytoplasm;cytoplasmic part;cytosol;extracellular membrane-bounded organelle;extracellular organelle;extracellular region part;extracellular vesicular exosome;intracellular membrane-bounded organelle;intracellular organelle;intracellular organelle part;intracellular part;macromolecular complex;membrane-bounded organelle;membrane-bounded vesic…		CS	2	2	2	18.3	18.3	18.3	19.155	12.076	120670000	23049000	97618000	0	NaN	0	NaN	0	NaN	0	NaN	A0A087WYT3;Q15185-3;Q15185-4;Q15185;Q15185-2	A0A087WYT3;Q15185-3;Q15185-4;Q15185;Q15185-2	Prostaglandin E synthase 3	PTGES3
NaN	NaN	NaN	NaN	NaN	NaN	NaN	NaN	NaN	NaN	NaN	NaN					biological regulation;cell cycle cytokinesis;cell cycle phase;cell cycle process;cellular component assembly;cellular component assembly at cellular level;cellular component organization;cellular component organization at cellular level;cellular component organization or biogenesis;cellular component organization or biogenesis at cellular level;cellular macromolecular complex assembly;cellular ma…	1-phosphatidylinositol binding;Arp2/3 complex binding;binding;enzyme binding;identical protein binding;lipid binding;phosphatidylinositol binding;phospholipid binding;protein binding;protein complex binding;protein dimerization activity;protein homodimerization activity;ubiquitin protein ligase binding	cell part;cell projection;clathrin-coated vesicle;coated vesicle;cytoplasm;cytoplasmic membrane-bounded vesicle;cytoplasmic part;cytoplasmic vesicle;cytoplasmic vesicle membrane;cytoplasmic vesicle part;endosome;extracellular membrane-bounded organelle;extracellular organelle;extracellular region part;extracellular vesicular exosome;extrinsic to internal side of plasma membrane;extrinsic to membr…		BAR_3_WASP_bdg;PX;SH3_1	3	3	3	7.4	7.4	7.4	66.476	9.2806	63507000	16749000	46758000	0	NaN	0	NaN	0	NaN	0	NaN	A0A087WYU1;Q9Y5X1	A0A087WYU1;Q9Y5X1	Sorting nexin;Sorting nexin-9	SNX9
NaN	NaN	NaN	NaN	NaN	NaN	NaN	NaN	NaN	NaN	NaN	NaN					anatomical structure development;anatomical structure formation involved in morphogenesis;anatomical structure morphogenesis;anterior/posterior pattern specification;biological regulation;bone development;brain development;bronchus morphogenesis;camera-type eye development;cell differentiation;cell surface receptor linked signaling pathway;cellular developmental process;cellular process;cellular …	binding;enzyme binding;lipid binding;phosphatidylinositol binding;phosphatidylinositol-4,5-bisphosphate binding;phospholipid binding;protein binding;protein complex binding	axoneme;cell part;cell projection;cell projection part;cilium;extracellular region;intracellular membrane-bounded organelle;intracellular non-membrane-bounded organelle;intracellular organelle;intracellular organelle part;intracellular part;membrane;membrane-bounded organelle;non-membrane-bounded organelle;nuclear part;nucleolus;nucleus;organelle;organelle part;plasma membrane;primary cilium		Tub	3	3	3	10.7	10.7	10.7	49.559	10.739	50345000	11619000	38726000	0	NaN	0	NaN	0	NaN	0	NaN	A0A087WYY4;O75386;O75386-2;F5H7B9;H0YFU8;H0YG12	A0A087WYY4;O75386;O75386-2;F5H7B9	Tubby-like protein;Tubby-related protein 3	TULP3
NaN	NaN	NaN	NaN	NaN	NaN	NaN	NaN	NaN	NaN	NaN	NaN					anatomical structure morphogenesis;biological regulation;biosynthetic process;cellular biosynthetic process;cellular macromolecule biosynthetic process;cellular macromolecule metabolic process;cellular metabolic process;cellular nitrogen compound metabolic process;cellular process;cellular response to stimulus;cellular response to stress;developmental process;DNA conformation change;DNA duplex un…	3'-5' DNA helicase activity;adenyl nucleotide binding;adenyl ribonucleotide binding;ATP binding;ATPase activity;ATPase activity, coupled;ATP-dependent 3'-5' DNA helicase activity;ATP-dependent DNA helicase activity;ATP-dependent helicase activity;binding;bubble DNA binding;catalytic activity;cation binding;DNA binding;DNA helicase activity;DNA secondary structure binding;DNA-dependent ATPase acti…	cell part;cytoplasm;intracellular membrane-bounded organelle;intracellular organelle;intracellular part;membrane;membrane-bounded organelle;nucleus;organelle		DEAD;Drc1-Sld2;Helicase_C	1	1	1	2	2	2	94.623	7.2891	15899000	11615000	4284400	0	NaN	0	NaN	0	NaN	0	NaN	A0A087X072;A0A087WZ30;O94761	A0A087X072;A0A087WZ30;O94761	ATP-dependent DNA helicase Q4	RECQL4
NaN	NaN	NaN	NaN	NaN	NaN	NaN	NaN	NaN	0.214498	NaN	NaN					5S class rRNA transcription from RNA polymerase III type 1 promoter;biosynthetic process;cellular biosynthetic process;cellular macromolecule biosynthetic process;cellular macromolecule metabolic process;cellular metabolic process;cellular nitrogen compound metabolic process;cellular process;gene expression;macromolecule biosynthetic process;macromolecule metabolic process;metabolic process;nitro…		cell part;intracellular organelle part;intracellular part;macromolecular complex;nuclear part;nucleoplasm;nucleoplasm part;organelle part;protein complex;transcription factor complex;transcription factor TFIIIC complex		WD40	2	2	2	3.3	3.3	3.3	63.874	3.3334	94168000	49613000	44555000	0	NaN	0	NaN	0	NaN	0	0.114498	A0A087WZD8;Q8WUA4-2;Q8WUA4	A0A087WZD8;Q8WUA4-2;Q8WUA4	General transcription factor 3C polypeptide 2	GTF3C2
NaN	NaN	NaN	NaN	NaN	NaN	NaN	NaN	2.30448	NaN	NaN	NaN					2-oxoglutarate metabolic process;acetyl-CoA catabolic process;acetyl-CoA metabolic process;carboxylic acid metabolic process;catabolic process;cellular catabolic process;cellular ketone metabolic process;cellular metabolic process;cellular nitrogen compound metabolic process;cellular process;coenzyme catabolic process;coenzyme metabolic process;cofactor catabolic process;cofactor metabolic proces…	binding;catalytic activity;cation binding;coenzyme binding;cofactor binding;electron carrier activity;ion binding;isocitrate dehydrogenase (NAD+) activity;isocitrate dehydrogenase activity;magnesium ion binding;metal ion binding;NAD binding;nucleotide binding;oxidoreductase activity;oxidoreductase activity, acting on CH-OH group of donors;oxidoreductase activity, acting on the CH-OH group of dono…	cell part;cytoplasmic part;intracellular membrane-bounded organelle;intracellular organelle;intracellular organelle lumen;intracellular organelle part;intracellular part;membrane-bounded organelle;membrane-enclosed lumen;mitochondrial matrix;mitochondrial part;mitochondrion;nucleus;organelle;organelle lumen;organelle part	Citrate cycle (TCA cycle)	Iso_dh	5	5	5	17.8	17.8	17.8	42.41	27.041	228260000	48971000	179290000	0	NaN	0	NaN	0	2.20448	0	NaN	A0A087WZN1;O43837;A0A087X2E5;O43837-3;O43837-2;A0A0D9SG66	A0A087WZN1;O43837;A0A087X2E5;O43837-3;O43837-2	Isocitrate dehydrogenase [NAD] subunit, mitochondrial;Isocitrate dehydrogenase [NAD] subunit beta, mitochondrial	IDH3B
0.0659859	0.00647761	0.00360232	0.0909888	0.143655	0.144568	-0.330066	-0.422985	-0.443929	-0.236741	-0.356938	-0.399521			+		anatomical structure morphogenesis;biological regulation;cell morphogenesis;cell morphogenesis involved in differentiation;cellular component morphogenesis;cellular component organization;cellular component organization or biogenesis;cellular developmental process;cellular process;developmental process;epithelial to mesenchymal transition;negative regulation of biological process;negative regulat…	binding;mRNA binding;nucleic acid binding;nucleotide binding;RNA binding	cell part;cytoplasm;intracellular membrane-bounded organelle;intracellular organelle;intracellular organelle part;intracellular part;macromolecular complex;membrane-bounded organelle;nuclear part;nucleoplasm;nucleus;organelle;organelle part;ribonucleoprotein complex		CBFNT;RRM_1	14	14	14	36.4	36.4	36.4	30.302	142.71	49463000000	30944000000	18519000000	1.17495	-0.0746447	0.561506	0.026404	2.3115	-0.498993	1.90158	-0.431067	D6R9P3;D6RD18;D6RBZ0;A0A087WZV1;Q99729-3;Q99729-2;Q99729-4;Q99729	D6R9P3;D6RD18;D6RBZ0;A0A087WZV1;Q99729-3;Q99729-2;Q99729-4;Q99729	Heterogeneous nuclear ribonucleoprotein A/B	HNRNPAB
NaN	NaN	NaN	NaN	NaN	NaN	NaN	NaN	NaN	NaN	NaN	NaN					biological regulation;negative regulation of biological process;negative regulation of cell communication;negative regulation of cellular process;negative regulation of growth hormone receptor signaling pathway;negative regulation of intracellular protein kinase cascade;negative regulation of JAK-STAT cascade;negative regulation of protein localization at cell surface;negative regulation of respo…	binding;protein binding;receptor binding	cell part;cytoplasmic part;endosomal part;endosome;endosome membrane;Golgi apparatus;Golgi apparatus part;Golgi membrane;integral to membrane;intracellular membrane-bounded organelle;intracellular organelle;intracellular organelle part;intracellular part;intrinsic to membrane;membrane;membrane part;membrane-bounded organelle;organelle;organelle membrane;organelle part		Vps55	1	1	1	9.3	9.3	9.3	15.428	3.1505	30468000	4572000	25896000	0	NaN	0	NaN	0	NaN	0	NaN	A0A087X0N2;O15243	A0A087X0N2;O15243	Leptin receptor gene-related protein	LEPROT
NaN	NaN	NaN	NaN	NaN	NaN	NaN	NaN	-0.235535	NaN	NaN	NaN					antigen processing and presentation;antigen processing and presentation of exogenous antigen;antigen processing and presentation of exogenous peptide antigen;antigen processing and presentation of exogenous peptide antigen via MHC class II;antigen processing and presentation of peptide antigen;antigen processing and presentation of peptide antigen via MHC class II;antigen processing and presentat…	adenyl nucleotide binding;adenyl ribonucleotide binding;ATP binding;ATPase activity;binding;catalytic activity;hydrolase activity;hydrolase activity, acting on acid anhydrides;hydrolase activity, acting on acid anhydrides, in phosphorus-containing anhydrides;kinetochore binding;microtubule motor activity;motor activity;nucleoside-triphosphatase activity;nucleotide binding;purine nucleotide bindin…	cell part;chromosomal part;chromosome;chromosome, centromeric region;condensed chromosome kinetochore;condensed chromosome outer kinetochore;condensed chromosome, centromeric region;condensed nuclear chromosome kinetochore;cytoplasm;cytoplasmic part;cytoskeletal part;cytoskeleton;cytosol;intracellular membrane-bounded organelle;intracellular non-membrane-bounded organelle;intracellular organelle;…		Kinesin	2	2	2	1.6	1.6	1.6	130.46	2.2211	10769000	7434800	3333900	0	NaN	0	NaN	0	-0.335535	0	NaN	D6RBW0;A0A087X0P0;Q02224-3;Q02224-2;Q02224	D6RBW0;A0A087X0P0;Q02224-3;Q02224-2;Q02224	Kinesin-like protein;Centromere-associated protein E	CENPE
NaN	NaN	NaN	NaN	NaN	NaN	NaN	NaN	NaN	NaN	NaN	NaN					biological regulation;cellular component organization;cellular component organization at cellular level;cellular component organization or biogenesis;cellular component organization or biogenesis at cellular level;cellular membrane organization;cellular process;endocytosis;establishment of localization;establishment of protein localization;membrane invagination;membrane organization;negative regu…	binding;enzyme binding;lipid binding;phosphatidylinositol binding;phospholipid binding;protein binding	cell part;cytoplasmic part;early endosome;endosome;extracellular membrane-bounded organelle;extracellular organelle;extracellular region part;extracellular vesicular exosome;extrinsic to membrane;intracellular membrane-bounded organelle;intracellular organelle;intracellular part;membrane part;membrane-bounded organelle;membrane-bounded vesicle;organelle;vesicle		PX	1	1	1	11	11	11	19.825	19.343	38759000	36529000	2229800	0	NaN	0	NaN	0	NaN	0	NaN	A0A087X0R6;Q9UMY4-3;Q9UMY4-2;Q9UMY4	A0A087X0R6;Q9UMY4-3;Q9UMY4-2;Q9UMY4	Sorting nexin-12	SNX12
NaN	NaN	NaN	NaN	NaN	2.92155	NaN	NaN	NaN	NaN	NaN	NaN					biological regulation;posttranscriptional regulation of gene expression;protein destabilization;regulation of biological process;regulation of biological quality;regulation of gene expression;regulation of macromolecule metabolic process;regulation of metabolic process;regulation of protein stability	binding;carbohydrate binding	cell part;cytoplasmic part;endoplasmic reticulum membrane;endoplasmic reticulum part;integral to membrane;intracellular organelle part;intracellular part;intrinsic to membrane;membrane;membrane part;organelle membrane;organelle part			5	5	5	4.6	4.6	4.6	139.38	6.7101	62271000	2723000	59548000	0	NaN	0	2.82155	0	NaN	0	NaN	J3KN36;A0A0G2JN29;A0A087X117;Q5JPE7-2;Q15155;P69849;Q5JPE7;A0A0G2JP90;A0A087WW46;Q5JPE7-3;A0A087WTD5	J3KN36;A0A0G2JN29;A0A087X117;Q5JPE7-2;Q15155;P69849;Q5JPE7;A0A0G2JP90;A0A087WW46;Q5JPE7-3	Nodal modulator 2;Nodal modulator 1;Nodal modulator 3	NOMO3;NOMO1;NOMO2
NaN	NaN	NaN	NaN	NaN	NaN	NaN	NaN	NaN	NaN	NaN	NaN					biological regulation;cell redox homeostasis;cellular homeostasis;cellular macromolecule metabolic process;cellular metabolic process;cellular process;cellular protein metabolic process;homeostatic process;macromolecule metabolic process;metabolic process;primary metabolic process;protein folding;protein metabolic process;regulation of biological process;regulation of biological quality;regulatio…	catalytic activity;flavin-linked sulfhydryl oxidase activity;intramolecular oxidoreductase activity;intramolecular oxidoreductase activity, interconverting keto- and enol-groups;intramolecular oxidoreductase activity, transposing S-S bonds;isomerase activity;oxidoreductase activity;oxidoreductase activity, acting on a sulfur group of donors;oxidoreductase activity, acting on a sulfur group of don…	cell part;cytoplasmic part;extracellular region part;extracellular space;Golgi apparatus part;integral to Golgi membrane;integral to membrane;integral to organelle membrane;intracellular organelle part;intracellular part;intrinsic to Golgi membrane;intrinsic to membrane;intrinsic to organelle membrane;membrane;membrane part;nuclear membrane;nuclear part;organelle membrane;organelle part;plasma me…		Evr1_Alr;Thioredoxin	2	2	2	3.7	3.7	3.7	77.249	18.78	39232000	1939400	37292000	0	NaN	0	NaN	0	NaN	0	NaN	A0A087X176;Q6ZRP7;H0Y430	A0A087X176;Q6ZRP7;H0Y430	Sulfhydryl oxidase;Sulfhydryl oxidase 2	QSOX2
NaN	NaN	NaN	NaN	NaN	NaN	NaN	2.18878	NaN	NaN	NaN	NaN					cellular metabolic process;cellular process;electron transport chain;generation of precursor metabolites and energy;metabolic process;mitochondrial electron transport, NADH to ubiquinone;oxidation-reduction process;respiratory electron transport chain;small molecule metabolic process	catalytic activity;NADH dehydrogenase (quinone) activity;NADH dehydrogenase (ubiquinone) activity;NADH dehydrogenase activity;oxidoreductase activity;oxidoreductase activity, acting on NADH or NADPH;oxidoreductase activity, acting on NADH or NADPH, quinone or similar compound as acceptor	cell part;cytoplasmic part;intracellular organelle part;intracellular part;macromolecular complex;membrane;membrane part;mitochondrial inner membrane;mitochondrial membrane;mitochondrial membrane part;mitochondrial part;mitochondrial respiratory chain complex I;NADH dehydrogenase complex;organelle inner membrane;organelle membrane;organelle part;protein complex;respiratory chain complex I	Alzheimer's disease;Huntington's disease;Oxidative phosphorylation;Parkinson's disease	ETC_C1_NDUFA5	2	2	2	27.1	27.1	27.1	7.8423	3.7637	60223000	7551400	52671000	0	NaN	0	NaN	0	2.08878	0	NaN	F8WAS3;C9IZN5;A0A087X1G1;H7BYD0;Q16718-2;Q16718	F8WAS3;C9IZN5;A0A087X1G1;H7BYD0;Q16718-2;Q16718	NADH dehydrogenase [ubiquinone] 1 alpha subcomplex subunit 5	NDUFA5
0.92235	0.803723	1.2959	0.212756	0.292546	0.268554	NaN	NaN	NaN	-0.272506	-0.316061	-0.272594					biological regulation;biosynthetic process;cellular biosynthetic process;cellular macromolecule biosynthetic process;cellular macromolecule metabolic process;cellular metabolic process;cellular nitrogen compound metabolic process;cellular process;macromolecule biosynthetic process;macromolecule metabolic process;metabolic process;nitrogen compound metabolic process;nucleic acid metabolic process;…	binding;core promoter proximal region DNA binding;core promoter proximal region sequence-specific DNA binding;DNA binding;nucleic acid binding;nucleic acid binding transcription factor activity;regulatory region DNA binding;regulatory region nucleic acid binding;RNA polymerase II core promoter proximal region sequence-specific DNA binding;RNA polymerase II core promoter proximal region sequence-s…	cell part;intracellular membrane-bounded organelle;intracellular organelle;intracellular part;membrane-bounded organelle;nucleus;organelle		CBF	19	19	19	22.2	22.2	22.2	114.16	86.627	2111100000	1206800000	904290000	1.59026	0.907324	1.66422	0.157952	0	NaN	2.8535	-0.387054	A0A087X1N2;Q03701;C9J9W7	A0A087X1N2;Q03701	CCAAT/enhancer-binding protein zeta	CEBPZ
0.639325	NaN	NaN	NaN	-0.0667748	NaN	NaN	NaN	0.64441	NaN	NaN	NaN					cellular macromolecule metabolic process;cellular metabolic process;cellular nitrogen compound metabolic process;cellular process;macromolecule metabolic process;metabolic process;ncRNA metabolic process;ncRNA processing;nitrogen compound metabolic process;nucleic acid metabolic process;nucleobase-containing compound metabolic process;primary metabolic process;RNA metabolic process;RNA processing…	catalytic activity;endonuclease activity;endonuclease activity, active with either ribo- or deoxyribonucleic acids and producing 5'-phosphomonoesters;endoribonuclease activity;endoribonuclease activity, producing 5'-phosphomonoesters;hydrolase activity;hydrolase activity, acting on ester bonds;nuclease activity;ribonuclease activity;ribonuclease P activity;tRNA-specific ribonuclease activity	cell part;intracellular membrane-bounded organelle;intracellular organelle;intracellular organelle part;intracellular part;macromolecular complex;membrane-bounded organelle;multimeric ribonuclease P complex;nuclear part;nucleolar part;nucleolar ribonuclease P complex;nucleus;organelle;organelle part;ribonuclease P complex;ribonucleoprotein complex	Ribosome biogenesis in eukaryotes;RNA transport	Ribonuc_P_40	4	4	4	16.2	16.2	16.2	36.783	18.409	238810000	119290000	119510000	0	0.539325	0	-0.166775	0	0.54441	0	NaN	A0A087X1N3;O75818-2;O75818;F8WC38;X6RLL4	A0A087X1N3;O75818-2;O75818;F8WC38;X6RLL4	Ribonuclease P protein subunit p40	RPP40
NaN	NaN	NaN	NaN	NaN	NaN	NaN	NaN	NaN	0.522458	NaN	NaN							cell part;intracellular membrane-bounded organelle;intracellular organelle;intracellular part;membrane-bounded organelle;nucleus;organelle			4	4	3	6.5	6.5	5.7	94.611	5.3895	196680000	105720000	90959000	0	NaN	0	NaN	0	NaN	0	0.422458	A0A087X239;Q6PCB5-2;Q6PCB5;H7C2D3;C9JM20	A0A087X239;Q6PCB5-2;Q6PCB5;H7C2D3;C9JM20	Round spermatid basic protein 1-like protein	RSBN1L
NaN	NaN	NaN	NaN	NaN	NaN	NaN	NaN	NaN	NaN	NaN	NaN					actin cytoskeleton organization;actin filament-based process;actomyosin structure organization;anatomical structure development;biological regulation;cellular component organization;cellular component organization at cellular level;cellular component organization or biogenesis;cellular component organization or biogenesis at cellular level;cellular process;cellular response to abiotic stimulus;ce…	actin binding;binding;cytoskeletal protein binding;protein binding	actin filament bundle;actomyosin;adherens junction;anchoring junction;cell junction;cell part;cell-cell junction;cell-substrate adherens junction;cell-substrate junction;cytoskeletal part;cytoskeleton;extracellular membrane-bounded organelle;extracellular organelle;extracellular region part;extracellular vesicular exosome;focal adhesion;intracellular non-membrane-bounded organelle;intracellular o…		Calponin;CH	2	1	1	18.9	11.5	11.5	16.498	6.891	9102700	7363500	1739200	0	NaN	0	NaN	0	NaN	0	NaN	K7ES69;A0A087X271;B4DDF4;B4DUT8;Q99439-2;Q99439	K7ES69;A0A087X271;B4DDF4;B4DUT8;Q99439-2;Q99439	Calponin;Calponin-2	CNN2
-0.615663	NaN	NaN	1.13455	1.54013	0.996172	NaN	0.183836	NaN	NaN	NaN	0.539233					biological regulation;cell cycle arrest;cell cycle process;cellular process;negative regulation of autophagy;negative regulation of biological process;negative regulation of catabolic process;negative regulation of cell cycle;negative regulation of cell proliferation;negative regulation of cellular catabolic process;negative regulation of cellular metabolic process;negative regulation of cellular…		cell part;cytoplasm;intracellular part;macromolecular complex;membrane;plasma membrane;protein complex		WD40	14	14	14	21.4	21.4	21.4	125	66.261	380600000	146450000	234140000	0	-0.715663	1.68918	1.12362	0	0.0838359	0	0.439233	A0A087X295;Q9NNW5;E9PDU5;E9PBK6;C9K020;V9GZ65;E5RFX3;F8WE36;C9JFP6;V9GYU1;Q6PKC6	A0A087X295;Q9NNW5;E9PDU5	WD repeat-containing protein 6	WDR6
NaN	NaN	NaN	NaN	-4.17749	-4.48646	-3.18023	NaN	-2.27935	NaN	-1.87631	NaN									C1-set;V-set	3	1	1	25.6	16.2	16.2	12.839	2.2996	6608900000	6433600000	175250000	0	NaN	1.65401	-4.43197	0.997866	-2.82979	0	-1.97631	A0A0B4J1V1;A0A087X2C0	A0A0B4J1V1;A0A087X2C0		IGHV3-21;IGHM
NaN	NaN	NaN	NaN	NaN	1.50085	1.20439	1.15205	1.19919	NaN	NaN	NaN			+		activation of immune response;activation of innate immune response;anaphase-promoting complex-dependent proteasomal ubiquitin-dependent protein catabolic process;antigen processing and presentation;antigen processing and presentation of exogenous antigen;antigen processing and presentation of exogenous peptide antigen;antigen processing and presentation of exogenous peptide antigen via MHC class …	adenyl nucleotide binding;adenyl ribonucleotide binding;ATP binding;ATPase activity;binding;binding, bridging;catalytic activity;hydrolase activity;hydrolase activity, acting on acid anhydrides;hydrolase activity, acting on acid anhydrides, in phosphorus-containing anhydrides;nucleoside-triphosphatase activity;nucleotide binding;protein binding;protein binding, bridging;purine nucleotide binding;…	cell part;cytoplasmic part;cytosol;cytosolic part;cytosolic proteasome complex;extracellular membrane-bounded organelle;extracellular organelle;extracellular region part;extracellular vesicular exosome;inclusion body;intracellular membrane-bounded organelle;intracellular organelle;intracellular organelle part;intracellular part;macromolecular complex;membrane;membrane-bounded organelle;membrane-b…	Proteasome	AAA	7	7	7	22.6	22.6	22.6	45.796	27.348	402810000	138420000	264390000	0	NaN	0	1.40085	3.62855	1.08521	0	NaN	A0A087X2I1;P62333;H0YJC0;H0YJS8;H0YJX2;H0YJE9;H0YJT1	A0A087X2I1;P62333;H0YJC0;H0YJS8	26S protease regulatory subunit 10B	PSMC6
NaN	NaN	NaN	NaN	NaN	NaN	NaN	1.59316	2.46835	NaN	NaN	NaN					biosynthetic process;carbohydrate biosynthetic process;carbohydrate metabolic process;cellular carbohydrate metabolic process;cellular lipid metabolic process;cellular macromolecule metabolic process;cellular metabolic process;cellular process;cellular protein metabolic process;dolichol-linked oligosaccharide biosynthetic process;glycosylation;lipid glycosylation;lipid metabolic process;lipid mod…	acetylglucosaminyltransferase activity;binding;carbohydrate binding;catalytic activity;cysteine-type peptidase activity;hydrolase activity;N-acetylglucosaminyldiphosphodolichol N-acetylglucosaminyltransferase activity;peptidase activity;peptidase activity, acting on L-amino acid peptides;transferase activity;transferase activity, transferring glycosyl groups;transferase activity, transferring hex…	cell part;cytoplasmic part;endoplasmic reticulum membrane;endoplasmic reticulum part;intracellular organelle part;intracellular part;membrane;membrane part;organelle membrane;organelle part	N-Glycan biosynthesis;Various types of N-glycan biosynthesis	Glyco_tran_28_C;OTU	3	3	3	13.6	13.6	13.6	17.801	4.0018	573460000	310940000	262520000	0	NaN	0	NaN	0.848052	1.93076	0	NaN	A0A096LP10;Q9NP73-2;A0A096LNJ4;A0A087WX43;A0A096LNL2;D6RE84;A0A087WTT9;Q9NP73;A0A087WT15	A0A096LP10;Q9NP73-2;A0A096LNJ4;A0A087WX43;A0A096LNL2;D6RE84;A0A087WTT9;Q9NP73	Putative bifunctional UDP-N-acetylglucosamine transferase and deubiquitinase ALG13	ALG13
NaN	NaN	NaN	NaN	NaN	NaN	NaN	NaN	NaN	NaN	NaN	NaN									BMP2K_C	1	1	1	3.5	3.5	3.5	54.448	3.231	6344300	0	6344300	0	NaN	0	NaN	0	NaN	0	NaN	A0A096LP25;Q6ZSR9	A0A096LP25;Q6ZSR9	Uncharacterized protein FLJ45252	AAK1
NaN	NaN	NaN	NaN	NaN	NaN	2.41733	3.29656	0.975924	NaN	NaN	NaN					amine biosynthetic process;amine metabolic process;biosynthetic process;carboxylic acid biosynthetic process;carboxylic acid metabolic process;cellular amine metabolic process;cellular amino acid biosynthetic process;cellular amino acid metabolic process;cellular biosynthetic process;cellular ketone metabolic process;cellular metabolic process;cellular nitrogen compound biosynthetic process;cellu…	catalytic activity;oxidoreductase activity;oxidoreductase activity, acting on the CH-NH group of donors;oxidoreductase activity, acting on the CH-NH group of donors, NAD or NADP as acceptor;pyrroline-5-carboxylate reductase activity		Arginine and proline metabolism	F420_oxidored;P5CR_dimer	7	7	7	31.5	31.5	31.5	29.892	18.274	782100000	313090000	469020000	0	NaN	0	NaN	1.0566	2.12994	0	NaN	A0A0A0MQS1;Q53H96;Q53H96-2;B5MD87;F8WEI0	A0A0A0MQS1;Q53H96;Q53H96-2;B5MD87	Pyrroline-5-carboxylate reductase;Pyrroline-5-carboxylate reductase 3	PYCRL
NaN	NaN	NaN	NaN	NaN	NaN	NaN	NaN	NaN	NaN	NaN	NaN					biological regulation;biosynthetic process;carboxylic acid metabolic process;cellular biosynthetic process;cellular hormone metabolic process;cellular ketone metabolic process;cellular lipid metabolic process;cellular metabolic process;cellular process;cellular response to stimulus;detection of abiotic stimulus;detection of external stimulus;detection of light stimulus;detection of stimulus;detec…	binding;isoprenoid binding;lipid binding;retinal binding;retinoid binding;retinol binding;transporter activity;vitamin binding	cell body;cell part;cytoplasmic part;cytosol;intracellular part		Lipocalin	4	4	4	25.9	25.9	25.9	22.31	51.627	89386000	87426000	1960200	0	NaN	0	NaN	0	NaN	0	NaN	A0A0A0MQT0;P09455;A0A0A0MTB9;H0YAK8;P09455-2;P09455-3	A0A0A0MQT0;P09455;A0A0A0MTB9;H0YAK8;P09455-2;P09455-3	Retinol-binding protein 1	RBP1
0.918539	1.24343	0.944784	0.671022	0.41684	0.325271	NaN	NaN	NaN	NaN	NaN	-0.141605					developmental process;multicellular organismal development;multicellular organismal process		cell part;cytoplasm;intracellular organelle part;intracellular part;nuclear part;nucleoplasm;organelle part		WD40;WD40_alt	7	7	7	17.8	17.8	17.8	43.237	17.315	400550000	189250000	211310000	1.91444	0.935583	1.15694	0.371044	0	NaN	0	-0.241605	U3KQC1;A0A0A0MQU0;Q9BV38;K7EIR0;K7EML4	U3KQC1;A0A0A0MQU0;Q9BV38;K7EIR0	WD repeat-containing protein 18	WDR18
-0.415326	-0.185605	-0.129213	0.27739	0.132511	-0.0664727	-0.124912	-0.35124	-0.40855	-0.0141207	-0.363698	-0.361917					alternative nuclear mRNA splicing, via spliceosome;anatomical structure development;anatomical structure morphogenesis;appendage morphogenesis;biological regulation;cell differentiation;cellular component assembly;cellular component assembly at cellular level;cellular component organization;cellular component organization at cellular level;cellular component organization or biogenesis;cellular co…	binding;cation binding;double-stranded RNA binding;ion binding;metal ion binding;nucleic acid binding;RNA binding	cell part;centrosome;cytoplasm;cytoplasmic part;cytoskeletal part;intracellular membrane-bounded organelle;intracellular non-membrane-bounded organelle;intracellular organelle;intracellular organelle part;intracellular part;macromolecular complex;membrane-bounded organelle;microtubule organizing center;non-membrane-bounded organelle;nuclear part;nucleoplasm;nucleus;organelle;organelle part;ribonu…		zf-CCCH	7	7	7	21.6	21.6	21.6	37.898	24.314	1339100000	811110000	528020000	1.22751	-0.343382	0.0468006	0.014476	1.34806	-0.394901	1.01561	-0.346579	C9JP00;A0A0A0MQX8;Q9NR56;Q9NR56-7;Q9NR56-6;Q9NR56-2;Q9NR56-5;H7C4T5;Q9NR56-3;Q9NR56-4;O95205;Q86VM6;Q5VZF2-3;Q5VZF2-2;Q5VZF2;C9JCX1;H7C4Y1;B1AKI6;Q9NUK0-2;Q9NUK0;C9J4T8;Q9NUK0-4;Q9NUK0-3	C9JP00;A0A0A0MQX8;Q9NR56;Q9NR56-7;Q9NR56-6;Q9NR56-2;Q9NR56-5;H7C4T5;Q9NR56-3;Q9NR56-4;O95205;Q86VM6;Q5VZF2-3;Q5VZF2-2;Q5VZF2	Muscleblind-like protein 1;Muscleblind-like protein 2	MBNL1;MBLL;MBNL2
NaN	NaN	NaN	NaN	NaN	NaN	NaN	NaN	NaN	NaN	NaN	NaN					biological regulation;cellular component organization;cellular component organization or biogenesis;cellular localization;cellular macromolecule localization;cellular membrane organization;cellular process;cellular protein localization;establishment of localization;establishment of localization in cell;Golgi vesicle transport;intracellular transport;localization;macromolecule localization;membran…		cell part;cell surface;cytoplasmic part;endoplasmic reticulum-Golgi intermediate compartment;Golgi apparatus;Golgi apparatus part;integral to Golgi membrane;integral to membrane;integral to organelle membrane;intracellular membrane-bounded organelle;intracellular organelle;intracellular organelle part;intracellular part;intrinsic to Golgi membrane;intrinsic to membrane;intrinsic to organelle memb…		Rer1	5	5	5	36.7	36.7	36.7	18.388	11.354	174230000	3491700	170740000	0	NaN	0	NaN	0	NaN	0	NaN	Q5T092;A0A0A0MR06;Q5T091;Q9P0H9;O15258;Q5T093	Q5T092;A0A0A0MR06;Q5T091;Q9P0H9;O15258;Q5T093	Protein RER1	RER1
NaN	NaN	NaN	NaN	NaN	NaN	NaN	NaN	NaN	NaN	NaN	NaN					biological regulation;cell cycle;cell cycle process;cellular component assembly;cellular component assembly at cellular level;cellular component organization;cellular component organization at cellular level;cellular component organization or biogenesis;cellular component organization or biogenesis at cellular level;cellular process;centrosome duplication;centrosome organization;cytoskeleton orga…	binding;enzyme binding;phosphatase binding;protein binding	cell part;centriole;centrosome;cytoplasm;cytoplasmic part;cytoskeletal part;cytosol;intracellular non-membrane-bounded organelle;intracellular organelle;intracellular organelle part;intracellular part;microtubule organizing center;microtubule organizing center part;non-membrane-bounded organelle;organelle;organelle part;pericentriolar material			4	4	4	2.2	2.2	2.2	211.99	3.8688	526640000	251490000	275150000	0	NaN	0	NaN	0	NaN	0	NaN	H0Y966;A0A0A0MR42;K7ENP4;Q8TEP8;Q8TEP8-3;K7EPA2;K7ELX0;Q8TEP8-2	H0Y966;A0A0A0MR42;K7ENP4;Q8TEP8;Q8TEP8-3;K7EPA2;K7ELX0;Q8TEP8-2	Centrosomal protein of 192 kDa	CEP192
NaN	NaN	NaN	NaN	NaN	NaN	1.31156	0.915483	1.34608	NaN	NaN	NaN					anatomical structure development;biological regulation;biosynthetic process;catabolic process;cell cycle;cell cycle arrest;cell cycle process;cellular biosynthetic process;cellular catabolic process;cellular component organization;cellular component organization at cellular level;cellular component organization or biogenesis;cellular component organization or biogenesis at cellular level;cellular…		cell part;CUL4 RING ubiquitin ligase complex;Cul4A-RING ubiquitin ligase complex;Cul4B-RING ubiquitin ligase complex;cullin-RING ubiquitin ligase complex;cytoplasm;extracellular membrane-bounded organelle;extracellular organelle;extracellular region part;extracellular vesicular exosome;intracellular organelle part;intracellular part;macromolecular complex;membrane;membrane-bounded organelle;membr…	Nucleotide excision repair;Ubiquitin mediated proteolysis	Cullin;Cullin_Nedd8	2	2	2	8.1	8.1	8.1	27.889	3.9956	55319000	20565000	34754000	0	NaN	0	NaN	1.80534	1.09104	0	NaN	A6NE76;A0A0A0MR50;K4DI93;Q13619-2;Q13620-3;Q13619;Q13620-1;Q13620;A0A087WWN2	A6NE76;A0A0A0MR50;K4DI93;Q13619-2;Q13620-3;Q13619;Q13620-1;Q13620;A0A087WWN2	Cullin-4A;Cullin-4B	CUL4B;CUL4A
0.304394	0.434882	0.29337	0.269512	0.289598	0.391548	NaN	NaN	NaN	-0.37286	-0.302066	-0.256373					3'-UTR-mediated mRNA stabilization;biological regulation;cellular macromolecule metabolic process;cellular metabolic process;cellular nitrogen compound metabolic process;cellular process;macromolecule metabolic process;metabolic process;mRNA metabolic process;mRNA processing;mRNA stabilization;negative regulation of biological process;negative regulation of biosynthetic process;negative regulatio…	binding;cation binding;identical protein binding;ion binding;metal ion binding;nucleic acid binding;nucleotide binding;protein binding;protein complex binding;transition metal ion binding;zinc ion binding	cell part;intracellular membrane-bounded organelle;intracellular organelle;intracellular organelle part;intracellular part;membrane-bounded organelle;nuclear part;nucleoplasm;nucleus;organelle;organelle part		G-patch;zf-RanBP	21	20	20	26.2	25.5	25.5	110.36	79.034	1931400000	1048200000	883190000	1.48245	0.244215	1.53721	0.216886	0	NaN	2.17085	-0.410433	A0A0A0MR66;P98175-2;P98175;P98175-4;P98175-3	A0A0A0MR66;P98175-2;P98175;P98175-4;P98175-3	RNA-binding protein 10	RBM10
NaN	NaN	NaN	NaN	NaN	NaN	NaN	NaN	NaN	NaN	NaN	NaN					actin cytoskeleton organization;actin filament-based process;anatomical structure formation involved in morphogenesis;anatomical structure morphogenesis;apoptosis;biological regulation;cell death;cell junction assembly;cell junction organization;cell part morphogenesis;cell projection morphogenesis;cell projection organization;cell-cell junction assembly;cell-cell junction organization;cellular c…	structural constituent of cytoskeleton;structural molecule activity	axolemma;axon part;cell junction;cell part;cell projection membrane;cell projection part;cell-cell junction;cytoplasm;cytoskeleton;extrinsic to membrane;intracellular non-membrane-bounded organelle;intracellular organelle;intracellular part;juxtaparanode region of axon;leading edge membrane;membrane;membrane part;neuron projection membrane;non-membrane-bounded organelle;organelle;paranode region …	Tight junction	4_1_CTD;FA;FERM_C;FERM_M;FERM_N;SAB	2	2	2	2.7	2.7	2.7	102.29	6.8381	146580000	57009000	89571000	0	NaN	0	NaN	0	NaN	0	NaN	A0A0A0MRA8;Q9Y2J2-2;Q9Y2J2-4;Q9Y2J2;J3QRQ6;J3KS70;J3QLU5;J3QKY2;J3KRD1;J3QKK4;J3QR33;J3QS55;A0A0J9YY18;A8K968;Q9Y2J2-3	A0A0A0MRA8;Q9Y2J2-2;Q9Y2J2-4;Q9Y2J2;J3QRQ6;J3KS70;J3QLU5;J3QKY2;J3KRD1;J3QKK4;J3QR33;J3QS55;A0A0J9YY18;A8K968;Q9Y2J2-3	Band 4.1-like protein 3;Band 4.1-like protein 3, N-terminally processed	EPB41L3
NaN	NaN	NaN	NaN	NaN	NaN	NaN	NaN	NaN	NaN	NaN	NaN					actin filament-based movement;actin filament-based process;ameboidal cell migration;biological regulation;cell migration;cell motility;cellular component movement;cellular component organization;cellular component organization at cellular level;cellular component organization or biogenesis;cellular component organization or biogenesis at cellular level;cellular localization;cellular macromolecule…	actin binding;binding;cytoskeletal protein binding;protein binding	adherens junction;aggresome;anchoring junction;cell junction;cell part;cell projection membrane;cell projection part;cell-substrate adherens junction;cell-substrate junction;contractile fiber part;cytoplasm;cytoplasmic part;cytoskeleton;endoplasmic reticulum;endoplasmic reticulum membrane;endoplasmic reticulum part;envelope;extracellular membrane-bounded organelle;extracellular organelle;extracel…		CH;KASH;Spectrin	3	3	3	0.7	0.7	0.7	408.72	3.0549	33894000	28073000	5820900	0	NaN	0	NaN	0	NaN	0	NaN	A0A0C4DGK3;G3V5X4;A0A0A0MRE3;Q8WXH0-7;Q8WXH0;Q8WXH0-2;Q8WXH0-3;Q8WXH0-13;G3V5D3;A0A0C4DH87;Q8WXH0-6;Q8WXH0-11;Q8WXH0-12;Q8WXH0-5;Q8WXH0-10;Q8WXH0-4;O60673-2;O60673	A0A0C4DGK3;G3V5X4;A0A0A0MRE3;Q8WXH0-7;Q8WXH0;Q8WXH0-2;Q8WXH0-3;Q8WXH0-13	Nesprin-2	SYNE2
NaN	NaN	NaN	NaN	NaN	NaN	NaN	NaN	NaN	NaN	NaN	NaN					aging;anatomical structure development;biological regulation;biosynthetic process;cell aging;cell communication;cell cycle;cell cycle arrest;cell cycle checkpoint;cell cycle process;cell differentiation;cell surface receptor linked signaling pathway;cellular biosynthetic process;cellular component assembly;cellular component assembly at cellular level;cellular component organization;cellular comp…	binding;cyclin-dependent protein kinase inhibitor activity;cyclin-dependent protein kinase regulator activity;enzyme binding;enzyme inhibitor activity;enzyme regulator activity;kinase binding;kinase inhibitor activity;kinase regulator activity;NF-kappaB binding;protein binding;protein kinase binding;protein kinase inhibitor activity;protein kinase regulator activity;protein serine/threonine kinas…	cell part;chromatin;chromosomal part;cytoplasm;cytoplasmic part;cytosol;heterochromatin;intracellular membrane-bounded organelle;intracellular organelle;intracellular organelle part;intracellular part;membrane-bounded organelle;nuclear part;nucleoplasm;nucleus;organelle;organelle part;senescence-associated heterochromatin focus	Bladder cancer;Cell cycle;Chronic myeloid leukemia;Glioma;Melanoma;Non-small cell lung cancer;p53 signaling pathway;Pancreatic cancer;Pathways in cancer;Small cell lung cancer;TGF-beta signaling pathway	Ank;Ank_2;P19Arf_N	1	1	1	11.5	11.5	11.5	11.075	2.2126	5432900	5432900	0	0	NaN	0	NaN	0	NaN	0	NaN	K7ES20;K7ENC6;J3QRG6;A0A0A0MRI0;P42771-2;P42772;P42771;P42771-4	K7ES20;K7ENC6;J3QRG6;A0A0A0MRI0;P42771-2;P42772;P42771;P42771-4	Cyclin-dependent kinase inhibitor 2A;Cyclin-dependent kinase 4 inhibitor B	CDKN2A;CDKN2B
-1.8706	-1.72423	-1.71364	-0.999336	-1.03121	-0.820107	0.275961	0.287118	0.280006	-0.124487	-0.285548	-0.266975	+	+	+		actin filament-based movement;actin filament-based process;anatomical structure development;anatomical structure morphogenesis;auditory receptor cell differentiation;behavior;biological regulation;cell communication;cell differentiation;cell projection organization;cell-cell signaling;cellular component assembly;cellular component assembly at cellular level;cellular component movement;cellular co…	actin binding;actin filament binding;adenyl nucleotide binding;adenyl ribonucleotide binding;ADP binding;ATP binding;binding;calmodulin binding;catalytic activity;cytoskeletal protein binding;hydrolase activity;hydrolase activity, acting on acid anhydrides;hydrolase activity, acting on acid anhydrides, in phosphorus-containing anhydrides;microfilament motor activity;minus-end directed microfilame…	apical part of cell;axon;cell body;cell cortex;cell part;cell projection;cell projection membrane;cell projection part;clathrin coated vesicle membrane;coated pit;coated vesicle membrane;cytoplasm;cytoplasmic membrane-bounded vesicle;cytoplasmic part;cytoplasmic vesicle;cytoplasmic vesicle membrane;cytoplasmic vesicle part;cytoskeletal part;cytosol;DNA-directed RNA polymerase II, holoenzyme;endoc…		Myosin_head	64	64	64	58.2	58.2	58.2	145.01	323.31	41402000000	24223000000	17179000000	3.13482	-1.86949	2.40993	-1.05022	3.489	0.181028	1.6281	-0.32567	A0A0A0MRM8;Q9UM54-5;Q9UM54-2;Q9UM54-6;E7EW20;Q9UM54-4;Q9UM54-1;Q9UM54;A0A0D9SGC1;Q5JVM0	A0A0A0MRM8;Q9UM54-5;Q9UM54-2;Q9UM54-6;E7EW20;Q9UM54-4;Q9UM54-1;Q9UM54;A0A0D9SGC1	Unconventional myosin-VI	MYO6
NaN	0.269512	NaN	0.63264	NaN	-0.0331561	NaN	NaN	NaN	0.0363276	0.273576	NaN					anatomical structure development;ATP-dependent chromatin remodeling;biological regulation;biosynthetic process;brain development;cell differentiation;cellular biosynthetic process;cellular component organization;cellular component organization at cellular level;cellular component organization or biogenesis;cellular component organization or biogenesis at cellular level;cellular developmental proc…	adenyl nucleotide binding;adenyl ribonucleotide binding;ATP binding;ATPase activity;binding;catalytic activity;chromatin binding;DNA binding;helicase activity;hydrolase activity;hydrolase activity, acting on acid anhydrides;hydrolase activity, acting on acid anhydrides, in phosphorus-containing anhydrides;nucleic acid binding;nucleoside-triphosphatase activity;nucleotide binding;purine nucleotide…	cell part;chromatin;chromatin remodeling complex;chromosomal part;intracellular membrane-bounded organelle;intracellular organelle;intracellular organelle part;intracellular part;ISWI complex;macromolecular complex;membrane-bounded organelle;nuclear chromatin;nuclear chromosome part;nuclear part;nucleus;NURF complex;organelle;organelle part;protein complex		DBINO;HAND;Helicase_C;SLIDE;SNF2_N	25	9	9	22.8	10.1	10.1	122.86	37.298	471810000	261060000	210760000	0	0.169512	0.183127	0.199742	0	NaN	0.140365	0.0549515	A0A0A0MRP6;B7ZLQ5;P28370-2;P28370	A0A0A0MRP6;B7ZLQ5;P28370-2;P28370	Probable global transcription activator SNF2L1	SMARCA1
0.345851	0.364236	0.128821	-0.283158	-0.149697	-0.492099	0.0332292	-0.154056	-0.0425905	0.56179	0.559247	0.498455					cellular component assembly;cellular component assembly at cellular level;cellular component organization;cellular component organization at cellular level;cellular component organization or biogenesis;cellular component organization or biogenesis at cellular level;cellular macromolecular complex assembly;cellular macromolecular complex subunit organization;cellular macromolecule metabolic proces…	binding;cation binding;identical protein binding;ion binding;metal ion binding;mRNA binding;nucleic acid binding;protein binding;protein dimerization activity;protein homodimerization activity;RNA binding;single-stranded RNA binding;snRNA binding;transition metal ion binding;U1 snRNA binding;zinc ion binding	Cajal body;cell part;commitment complex;intracellular organelle part;intracellular part;macromolecular complex;nuclear body;nuclear part;nucleoplasm;nucleoplasm part;organelle part;prespliceosome;ribonucleoprotein complex;small nuclear ribonucleoprotein complex;spliceosomal complex;U1 snRNP;U2-type prespliceosome;U2-type spliceosomal complex	Spliceosome	zf-U1	6	6	6	27.8	27.8	27.8	19.687	110.91	25160000000	6657900000	18502000000	0.851815	0.179636	1.26195	-0.408318	0.979476	-0.154473	2.65603	0.439831	A0A0A0MRR7;P09234;Q5TAL2	A0A0A0MRR7;P09234	U1 small nuclear ribonucleoprotein C	SNRPC
-0.374655	0.498455	0.481299	-0.327783	-0.201361	-0.279984	-0.334025	-0.261466	-0.521018	0.340049	0.546265	0.416407					biosynthetic process;cell differentiation;cellular biosynthetic process;cellular developmental process;cellular macromolecule biosynthetic process;cellular macromolecule metabolic process;cellular metabolic process;cellular process;cellular protein metabolic process;developmental process;establishment of localization;establishment of protein localization;macromolecule biosynthetic process;macromo…	receptor activity	cell part;cytoplasmic part;endoplasmic reticulum;endoplasmic reticulum part;integral to endoplasmic reticulum membrane;integral to membrane;integral to organelle membrane;intracellular membrane-bounded organelle;intracellular non-membrane-bounded organelle;intracellular organelle;intracellular organelle part;intracellular part;intrinsic to endoplasmic reticulum membrane;intrinsic to membrane;intr…	Protein processing in endoplasmic reticulum	Rib_recp_KP_reg	34	34	33	30.7	30.7	30.1	152.45	258.2	7844600000	5051700000	2792900000	0.120379	0.1017	2.00915	-0.369709	1.58871	-0.47217	1.50955	0.334241	A0A0A0MRV0;Q9P2E9-3;Q9P2E9-2;Q9P2E9;A0A087WVV2;F8W7S5;A0A087WU26;A2A2S5;V9GY78;REV__Q9P2M7;Q8N4C6-6;Q8N4C6-11	A0A0A0MRV0;Q9P2E9-3;Q9P2E9-2;Q9P2E9;A0A087WVV2;F8W7S5	Ribosome-binding protein 1	RRBP1
-0.28293	-0.689125	NaN	NaN	NaN	NaN	-0.782695	NaN	-0.925659	-0.209779	0.0688772	-0.121612					biological regulation;cellular macromolecule metabolic process;cellular metabolic process;cellular nitrogen compound metabolic process;cellular process;macromolecule metabolic process;metabolic process;mRNA metabolic process;mRNA processing;nitrogen compound metabolic process;nucleic acid metabolic process;nucleobase-containing compound metabolic process;primary metabolic process;regulation of bi…	AU-rich element binding;binding;mRNA 3'-UTR binding;mRNA binding;nucleic acid binding;nucleotide binding;RNA binding			RRM_1	8	6	6	26.5	21.9	21.9	42.632	17.091	681110000	414110000	267000000	0.672878	-0.586027	0	NaN	1.32236	-0.954177	0.823414	-0.187504	A0A0A0MRX1;Q12926-2;Q12926;B1APY9;B1APY8;A0A0R4J2E6;P26378-4;P26378-2;P26378-5;P26378;P26378-3;B1AM48;Q14576-2;Q14576;C9JB16	A0A0A0MRX1;Q12926-2;Q12926;B1APY9;B1APY8;A0A0R4J2E6;P26378-4;P26378-2;P26378-5;P26378;P26378-3;B1AM48	ELAV-like protein;ELAV-like protein 2;ELAV-like protein 4	ELAVL2;ELAVL4
NaN	NaN	NaN	NaN	NaN	NaN	NaN	NaN	-0.21838	NaN	NaN	NaN					activation of immune response;activation of innate immune response;biological adhesion;biological regulation;biosynthetic process;cell adhesion;cell-cell adhesion;cellular biosynthetic process;cellular macromolecule biosynthetic process;cellular macromolecule metabolic process;cellular metabolic process;cellular process;cellular protein metabolic process;cellular response to stimulus;defense resp…	binding;enzyme binding;kinase binding;mitogen-activated protein kinase binding;protein binding;protein kinase binding	cell part;cytoplasm;intracellular;intracellular membrane-bounded organelle;intracellular organelle;intracellular part;membrane-bounded organelle;nucleus;organelle			2	2	2	5.1	5.1	5.1	55.697	6.5709	138190000	90506000	47688000	0	NaN	0	NaN	0	-0.31838	0	NaN	E7EMV7;A0A0A0MRZ4;Q15025-7;Q15025-8;Q15025-5;Q15025-6;Q15025-4;Q15025-3;Q15025-2;Q15025;H0YC17;E7EW15	E7EMV7;A0A0A0MRZ4;Q15025-7;Q15025-8;Q15025-5;Q15025-6;Q15025-4;Q15025-3;Q15025-2;Q15025;H0YC17;E7EW15	TNFAIP3-interacting protein 1	TNIP1
-7.14565	NaN	NaN	-5.00083	NaN	NaN	-5.13664	NaN	-2.73822	-5.99364	NaN	-3.06166									V-set	1	1	1	9.4	9.4	9.4	13.508	58.346	286310000000	286270000000	38038000	0	-7.24565	0	-5.10083	0.735636	-4.03743	0.709282	-4.62765	A0A0A0MS14	A0A0A0MS14		IGHV1-45
NaN	NaN	NaN	NaN	NaN	NaN	NaN	NaN	NaN	NaN	NaN	NaN					biological regulation;cell cycle;cell cycle process;cellular process;cellular response to stimulus;G2/M transition of mitotic cell cycle;intracellular signal transduction;mitotic cell cycle;positive regulation of catalytic activity;positive regulation of molecular function;regulation of biological process;regulation of catalytic activity;regulation of cellular process;regulation of metabolic proc…	enzyme activator activity;enzyme regulator activity;phosphatase regulator activity	cell part;cytoplasmic part;cytosol;intracellular organelle part;intracellular part;nuclear part;nucleoplasm;organelle part	Vascular smooth muscle contraction	Ank	2	1	1	3.1	2.1	2.1	116.5	4.8039	22846000	11398000	11448000	0	NaN	0	NaN	0	NaN	0	NaN	A0A0A0MS24;O60237;H7C4R6;O60237-2;O60237-5	A0A0A0MS24;O60237;H7C4R6;O60237-2;O60237-5	Protein phosphatase 1 regulatory subunit 12B	PPP1R12B
0.922731	NaN	NaN	3.41495	3.48182	4.56949	2.34474	2.28901	2.5807	NaN	NaN	NaN			+		biological regulation;cation homeostasis;chemical homeostasis;homeostatic process;ion homeostasis;iron ion homeostasis;regulation of biological quality	ion transmembrane transporter activity;substrate-specific transmembrane transporter activity;substrate-specific transporter activity;transmembrane transporter activity;transporter activity	cell part;cytoplasmic part;integral to membrane;intracellular membrane-bounded organelle;intracellular organelle;intracellular organelle part;intracellular part;intrinsic to membrane;membrane;membrane part;membrane-bounded organelle;mitochondrial membrane;mitochondrial part;mitochondrion;organelle;organelle membrane;organelle part		Mtc	14	14	13	61.7	61.7	55.8	35.503	129.75	5213000000	1052100000	4161000000	0	0.822731	2.00189	3.72208	2.82357	2.30482	0	NaN	A0A0A0MS41;Q9BWM7;S4R3N9	A0A0A0MS41;Q9BWM7;S4R3N9	Sideroflexin;Sideroflexin-3	SFXN3
NaN	NaN	NaN	-0.737495	NaN	NaN	-1.16683	-1.67273	-1.75789	-2.41365	NaN	NaN					actin cytoskeleton organization;actin filament capping;actin filament organization;actin filament polymerization;actin filament severing;actin filament-based process;actin nucleation;actin polymerization or depolymerization;aging;anatomical structure development;anatomical structure morphogenesis;apoptosis;barbed-end actin filament capping;biological regulation;cell death;cell development;cell pa…	actin binding;binding;calcium ion binding;cation binding;cytoskeletal protein binding;ion binding;metal ion binding;myosin binding;myosin II binding;protein binding;protein domain specific binding	actin cap;actin cytoskeleton;adherens junction;anchoring junction;blood microparticle;cell cortex part;cell junction;cell part;cell projection;cell-substrate adherens junction;cell-substrate junction;cortical actin cytoskeleton;cortical cytoskeleton;cytoplasm;cytoplasmic part;cytoskeletal part;cytoskeleton;cytosol;extracellular membrane-bounded organelle;extracellular organelle;extracellular regi…	Fc gamma R-mediated phagocytosis;Regulation of actin cytoskeleton	Gelsolin	12	12	3	21	21	7.8	82.525	227.84	2775700000	2041800000	733950000	0	NaN	0	-0.837495	1.90205	-1.63248	0	-2.51365	A0A0A0MS51;A0A0A0MT01;P06396-2;P06396-4;P06396-3;P06396;Q5T0I1;A0A0U1RQL8;Q5T0I0	A0A0A0MS51;A0A0A0MT01;P06396-2;P06396-4;P06396-3;P06396	Gelsolin	GSN
-0.16809	0.121281	-0.423971	2.4016	2.77395	2.63698	0.512884	0.301588	0.626112	NaN	0.422125	NaN		+			anatomical structure development;biological regulation;calcium ion transport;cation transport;cell communication;cell cycle process;cell differentiation;cell surface receptor linked signaling pathway;cell-cell signaling;cellular component assembly;cellular component organization;cellular component organization or biogenesis;cellular developmental process;cellular macromolecule metabolic process;c…	adenyl nucleotide binding;adenyl ribonucleotide binding;ATP binding;binding;calcium-dependent protein serine/threonine phosphatase activity;calmodulin binding;calmodulin-dependent protein kinase activity;catalytic activity;hydrolase activity;hydrolase activity, acting on ester bonds;identical protein binding;kinase activity;nucleotide binding;phosphatase activity;phosphoprotein phosphatase activi…	cell part;cytoplasmic part;cytoplasmic vesicle membrane;cytoplasmic vesicle part;cytosol;endocytic vesicle membrane;endoplasmic reticulum membrane;endoplasmic reticulum part;intracellular organelle part;intracellular part;membrane;membrane part;nuclear part;nucleoplasm;organelle membrane;organelle part;plasma membrane;sarcoplasmic reticulum membrane;vesicle membrane	Calcium signaling pathway;ErbB signaling pathway;Gastric acid secretion;Glioma;GnRH signaling pathway;ko05152;Long-term potentiation;Melanogenesis;Neurotrophin signaling pathway;Olfactory transduction;Oocyte meiosis;Phototransduction - fly;Wnt signaling pathway	CaMKII_AD;Pkinase	15	15	10	37.6	37.6	27.1	57.796	103.24	2337100000	1071000000	1266100000	0.611881	-0.256927	2.72584	2.50418	1.24227	0.380195	0	0.322125	Q5SWX3;A0A0A0MS52;Q13555-10;Q13555-5;Q13555-4;A0A0A0MT11;Q13555-3;Q13555-7;Q13555-9;Q13555-2;Q13555-8;Q13555;Q13555-6;Q8WU40;H0Y6G2;Q13554-7;Q13554-4;Q13554-6;Q13554-3;Q13554-8;Q13554-5;Q13554-2;Q13554;H7BXS4;Q9UQM7;Q9UQM7-2;E9PBE8;E7EQE4;D6RFJ0;E7ERS6;E7ETC9;D6RHX9;H7BZC6;H7C394	Q5SWX3;A0A0A0MS52;Q13555-10;Q13555-5;Q13555-4;A0A0A0MT11;Q13555-3;Q13555-7;Q13555-9;Q13555-2;Q13555-8;Q13555;Q13555-6;Q8WU40;H0Y6G2	Calcium/calmodulin-dependent protein kinase type II subunit gamma	CAMK2G
NaN	NaN	NaN	NaN	NaN	NaN	NaN	NaN	NaN	NaN	NaN	NaN					activation of adenylate cyclase activity;activation of adenylate cyclase activity by G-protein signaling pathway;activation of phospholipase C activity;activation of protein kinase A activity;activation of protein kinase activity;biological regulation;biosynthetic process;cAMP-mediated signaling;cell communication;cell surface receptor linked signaling pathway;cell-cell signaling;cellular biosynt…	adenyl nucleotide binding;adenyl ribonucleotide binding;adenylate cyclase activity;ATP binding;binding;catalytic activity;cation binding;cyclase activity;ion binding;lyase activity;metal ion binding;nucleotide binding;phosphorus-oxygen lyase activity;purine nucleotide binding;purine ribonucleoside triphosphate binding;purine ribonucleotide binding;ribonucleotide binding	cell part;cell projection;cilium;cytoplasm;integral to membrane;integral to plasma membrane;intracellular part;intrinsic to membrane;intrinsic to plasma membrane;membrane;membrane part;plasma membrane;plasma membrane part	Bile secretion;Calcium signaling pathway;Chemokine signaling pathway;Dilated cardiomyopathy;Gap junction;Gastric acid secretion;GnRH signaling pathway;Melanogenesis;Olfactory transduction;Oocyte meiosis;Pancreatic secretion;Progesterone-mediated oocyte maturation;Purine metabolism;Salivary secretion;Vascular smooth muscle contraction;Vasopressin-regulated water reabsorption;Vibrio cholerae infect…	Guanylate_cyc	1	1	1	2.8	2.8	2.8	89.121	4.5255	7467400	0	7467400	0	NaN	0	NaN	0	NaN	0	NaN	U3KQ91;A0A0A0MSC1;O60266-2;O60266	U3KQ91;A0A0A0MSC1;O60266-2;O60266	Adenylate cyclase type 3	ADCY3
NaN	1.14424	1.34574	NaN	2.66555	0.136716	NaN	NaN	NaN	NaN	-0.851912	NaN					anatomical structure morphogenesis;biological adhesion;biological regulation;camera-type eye morphogenesis;cell adhesion;cell-cell adhesion;cellular process;cellular response to stimulus;developmental process;eye morphogenesis;homophilic cell adhesion;organ morphogenesis;positive regulation of biological process;positive regulation of cell projection organization;positive regulation of cellular c…	binding;identical protein binding;protein binding;protein dimerization activity;protein heterodimerization activity;protein homodimerization activity	axon;cell part;cell projection;integral to membrane;intrinsic to membrane;membrane;membrane part;neuron projection		Ten_N;Tox-GHH	5	5	5	2.7	2.7	2.7	281.76	7.852	236480000	91448000	145040000	1.2528	1.14499	0.309016	1.30113	0	NaN	0	-0.951912	A0A0A0MSD6;Q9P273;H0YCJ4;Q6N022	A0A0A0MSD6;Q9P273	Teneurin-3	TENM3
2.57071	3.68594	NaN	NaN	1.20533	NaN	2.53506	2.88557	2.90205	1.83026	NaN	NaN			+		anatomical structure development;anatomical structure formation involved in morphogenesis;androgen receptor signaling pathway;atrial cardiac muscle cell development;biological regulation;biosynthetic process;cardiac cell development;cardiac muscle cell development;cell development;cell differentiation;cellular biosynthetic process;cellular developmental process;cellular lipid metabolic process;ce…	androgen receptor binding;binding;cation binding;hormone receptor binding;identical protein binding;ion binding;metal ion binding;nuclear hormone receptor binding;protein binding;protein binding transcription factor activity;receptor binding;steroid hormone receptor binding;transcription coactivator activity;transcription cofactor activity;transcription factor binding;transcription factor binding…	actin cytoskeleton;adherens junction;anchoring junction;cell junction;cell part;cell-substrate adherens junction;cell-substrate junction;contractile fiber part;cytoplasmic part;cytoskeleton;focal adhesion;intracellular membrane-bounded organelle;intracellular non-membrane-bounded organelle;intracellular organelle;intracellular organelle part;intracellular part;M band;membrane-bounded organelle;no…	Osteoclast differentiation	LIM	15	15	15	50.6	50.6	50.6	44.205	58.535	4709500000	2360500000	2349100000	0.935824	3.02832	0	1.10533	2.69965	2.67423	0	1.73026	J3KNW4;A0A0A0MSG2;Q14192;F8WDA8;U3KQT4;Q14192-2;C9J3S8	J3KNW4;A0A0A0MSG2;Q14192	Four and a half LIM domains protein 2	FHL2
0.313826	0.494876	0.741834	-0.0504426	0.238665	0.157949	NaN	NaN	NaN	-0.250663	-0.755819	NaN					biological regulation;biosynthetic process;cellular biosynthetic process;cellular macromolecule biosynthetic process;cellular macromolecule metabolic process;cellular metabolic process;cellular nitrogen compound metabolic process;cellular process;macromolecule biosynthetic process;macromolecule metabolic process;metabolic process;nitrogen compound metabolic process;nucleic acid metabolic process;…	binding;chromatin binding;DNA binding;nucleic acid binding	cell part;intracellular membrane-bounded organelle;intracellular organelle;intracellular organelle part;intracellular part;membrane-bounded organelle;nuclear part;nucleoplasm;nucleus;organelle;organelle part		ELM2	13	13	13	19.9	19.9	19.9	111.92	67.98	1007300000	614490000	392780000	1.10628	0.416845	0.0581694	0.0153904	0	NaN	0.597851	-0.603241	A0A0A0MSU2;Q6PJG2;H7C1L3	A0A0A0MSU2;Q6PJG2	ELM2 and SANT domain-containing protein 1	ELMSAN1
NaN	NaN	NaN	NaN	NaN	NaN	NaN	NaN	NaN	NaN	NaN	NaN					amide transport;antigen processing and presentation;antigen processing and presentation of endogenous antigen;antigen processing and presentation of endogenous peptide antigen;antigen processing and presentation of endogenous peptide antigen via MHC class I;antigen processing and presentation of exogenous antigen;antigen processing and presentation of exogenous peptide antigen;antigen processing …	active transmembrane transporter activity;antigen binding;ATPase activity;ATPase activity, coupled;ATPase activity, coupled to movement of substances;ATPase activity, coupled to transmembrane movement of substances;binding;catalytic activity;hydrolase activity;hydrolase activity, acting on acid anhydrides;hydrolase activity, acting on acid anhydrides, catalyzing transmembrane movement of substanc…	cell part;cytoplasmic part;endoplasmic reticulum;endoplasmic reticulum membrane;endoplasmic reticulum part;Golgi apparatus part;Golgi membrane;integral to endoplasmic reticulum membrane;integral to lumenal side of endoplasmic reticulum membrane;integral to membrane;integral to organelle membrane;intracellular membrane-bounded organelle;intracellular organelle;intracellular organelle part;intracel…	Antigen processing and presentation	C1-set	4	4	4	10	10	10	47.606	7.9511	344060000	73761000	270300000	0	NaN	0	NaN	0	NaN	0	NaN	A0A0G2JKZ1;A2AB90;A0A0G2JH37;A0A0A0MSV9;O15533-2;O15533;O15533-3;Q6P1N7;C9JA35;A0A0A0MT98;O15533-4	A0A0G2JKZ1;A2AB90;A0A0G2JH37;A0A0A0MSV9;O15533-2;O15533;O15533-3;Q6P1N7;C9JA35;A0A0A0MT98;O15533-4	Tapasin	TAPBP
0.098689	0.499272	-0.308216	-0.178404	-0.271583	-0.258943	NaN	NaN	NaN	NaN	-0.0525807	-0.277132					biological regulation;biosynthetic process;carbohydrate metabolic process;carbohydrate transport;cell cycle;cell cycle process;cell surface receptor linked signaling pathway;cellular biosynthetic process;cellular component disassembly;cellular component disassembly at cellular level;cellular component organization;cellular component organization at cellular level;cellular component organization o…	nucleocytoplasmic transporter activity;transporter activity	adherens junction;anchoring junction;cell junction;cell part;cell-substrate adherens junction;cell-substrate junction;cytoplasmic part;cytosol;focal adhesion;intracellular membrane-bounded organelle;intracellular organelle;intracellular organelle part;intracellular part;macromolecular complex;membrane part;membrane-bounded organelle;nuclear part;nuclear pore;nucleoplasm;nucleus;organelle;organell…	RNA transport		6	6	6	5.1	5.1	5.1	152.57	14.571	273970000	163100000	110870000	0.00452655	-0.0034183	2.12812	-0.33631	0	NaN	0.593032	-0.264856	A0A0A0MSW3;P35658-2;P35658-4;P35658;P35658-3;P35658-5;E9PKD2;B7ZAV2;H0Y837;H0YF36	A0A0A0MSW3;P35658-2;P35658-4;P35658;P35658-3;P35658-5	Nuclear pore complex protein Nup214	NUP214
NaN	NaN	NaN	NaN	NaN	NaN	NaN	NaN	NaN	NaN	NaN	NaN					anatomical structure development;anatomical structure homeostasis;anatomical structure morphogenesis;biological regulation;catabolic process;cell morphogenesis;cell proliferation;cellular component morphogenesis;cellular component organization;cellular component organization or biogenesis;cellular developmental process;cellular process;cytokine production;defense response;developmental process;ho…	carboxylic ester hydrolase activity;catalytic activity;hydrolase activity;hydrolase activity, acting on ester bonds;lipase activity;sterol esterase activity	cell part;cytoplasmic part;extracellular membrane-bounded organelle;extracellular organelle;extracellular region part;extracellular vesicular exosome;intracellular membrane-bounded organelle;intracellular organelle;intracellular part;lysosome;lytic vacuole;membrane-bounded organelle;membrane-bounded vesicle;organelle;vacuole;vesicle	Lysosome;Steroid biosynthesis	Abhydro_lipase;Abhydrolase_1	2	2	2	22.4	22.4	22.4	24.381	16.234	86152000	85951000	200910	0	NaN	0	NaN	0	NaN	0	NaN	Q5T770;A0A0A0MT32;Q5T073;P38571-2;P38571	Q5T770;A0A0A0MT32;Q5T073;P38571-2;P38571	Lysosomal acid lipase/cholesteryl ester hydrolase	LIPA
0.578504	0.763072	0.721766	0.0988237	0.0932897	0.367483	NaN	NaN	NaN	NaN	0.40523	0.181548					anatomical structure development;anatomical structure formation involved in morphogenesis;anatomical structure morphogenesis;aortic smooth muscle cell differentiation;appendage morphogenesis;ATP-dependent chromatin remodeling;biological regulation;blastocyst growth;blastocyst hatching;cell development;cell differentiation;cell fate determination;cell morphogenesis;cellular component disassembly;c…	adenyl nucleotide binding;adenyl ribonucleotide binding;androgen receptor binding;ATP binding;ATPase activity;ATPase activity, coupled;binding;catalytic activity;chromatin binding;DNA binding;DNA polymerase binding;DNA-dependent ATPase activity;enzyme binding;helicase activity;histone acetyl-lysine binding;histone binding;hormone receptor binding;hydrolase activity;hydrolase activity, acting on a…	cell part;chromatin;chromatin remodeling complex;chromosomal part;euchromatin;extracellular region part;extracellular space;heterochromatin;intracellular membrane-bounded organelle;intracellular non-membrane-bounded organelle;intracellular organelle;intracellular organelle part;intracellular part;macromolecular complex;membrane;membrane-bounded organelle;nBAF complex;non-membrane-bounded organell…		BRK;Bromodomain;Helicase_C;HSA;QLQ;SnAC;SNF2_N	14	14	6	9.3	9.3	4.3	188.15	36.598	870150000	436510000	433640000	2.04908	0.587781	0.356691	0.0865321	0	NaN	0.476517	0.193389	Q9HBD4;A0A0A0MT49;P51532-5;P51532-2;P51532-3;P51532-4;P51532;K7EP28	Q9HBD4;A0A0A0MT49;P51532-5;P51532-2;P51532-3;P51532-4;P51532	Transcription activator BRG1	SMARCA4
NaN	NaN	NaN	NaN	NaN	NaN	NaN	NaN	NaN	NaN	NaN	NaN					biological regulation;carbohydrate metabolic process;cation transport;cell redox homeostasis;cellular carbohydrate metabolic process;cellular homeostasis;cellular macromolecule metabolic process;cellular metabolic process;cellular process;cellular protein metabolic process;cognition;divalent inorganic cation transport;divalent metal ion transport;establishment of localization;glycosylation;homeos…	cation transmembrane transporter activity;divalent inorganic cation transmembrane transporter activity;inorganic cation transmembrane transporter activity;ion transmembrane transporter activity;magnesium ion transmembrane transporter activity;metal ion transmembrane transporter activity;substrate-specific transmembrane transporter activity;substrate-specific transporter activity;transmembrane tra…	cell part;cytoplasmic part;endoplasmic reticulum membrane;endoplasmic reticulum part;integral to membrane;integral to plasma membrane;intracellular membrane-bounded organelle;intracellular organelle;intracellular organelle part;intracellular part;intrinsic to membrane;intrinsic to plasma membrane;macromolecular complex;membrane;membrane part;membrane-bounded organelle;mitochondrion;oligosaccharyl…	N-Glycan biosynthesis;Protein processing in endoplasmic reticulum;Various types of N-glycan biosynthesis	OST3_OST6;Thioredoxin	2	2	2	6.5	6.5	6.5	31.869	3.3603	85676000	25138000	60538000	0	NaN	0	NaN	0	NaN	0	NaN	D6RDV0;D6RA37;A0A0A0MTC2;D6RIY7;Q13454-2;Q13454	D6RDV0;D6RA37;A0A0A0MTC2;D6RIY7;Q13454-2;Q13454	Tumor suppressor candidate 3	TUSC3
-0.77821	NaN	NaN	-0.482271	-0.643676	-0.417887	-1.07875	-0.94764	-1.03218	-0.237966	-0.356587	NaN			+		establishment of localization;transport	binding;double-stranded RNA binding;nucleic acid binding;RNA binding	cell part;cytoplasmic part;cytoskeletal part;endoplasmic reticulum;intracellular membrane-bounded organelle;intracellular non-membrane-bounded organelle;intracellular organelle;intracellular organelle part;intracellular part;macromolecular complex;membrane;membrane-bounded organelle;microtubule;non-membrane-bounded organelle;nuclear part;nucleolus;organelle;organelle part;protein complex		dsrm	13	11	11	41	37.2	37.2	43.278	81.189	1775900000	1249500000	526400000	0	-0.87821	1.93073	-0.614611	2.93078	-1.11952	1.02528	-0.397276	A0A0A0MTC4;E9PH62;A0A0A0MTC5;Q9NUL3-6;Q9NUL3-2;Q9NUL3;E5RJN7;A0A0A0MTD1;F8VPI7;E7EPX0;A0A0A0MTC6;E7EVJ4;Q9NUL3-8;Q9NUL3-3;Q9NUL3-7;Q9NUL3-4;G5EA18;E7EVI1;E5RJ67;H0YBY0;E5RFK1	A0A0A0MTC4;E9PH62;A0A0A0MTC5;Q9NUL3-6;Q9NUL3-2;Q9NUL3;E5RJN7;A0A0A0MTD1;F8VPI7;E7EPX0;A0A0A0MTC6;E7EVJ4;Q9NUL3-8;Q9NUL3-3;Q9NUL3-7;Q9NUL3-4;G5EA18;E7EVI1	Double-stranded RNA-binding protein Staufen homolog 2	STAU2
NaN	NaN	NaN	NaN	NaN	NaN	NaN	NaN	NaN	NaN	NaN	NaN					aging;ameboidal cell migration;anatomical structure development;anatomical structure formation involved in morphogenesis;anatomical structure morphogenesis;axon ensheathment;biological adhesion;biological regulation;branching involved in ureteric bud morphogenesis;branching morphogenesis of a tube;cell adhesion;cell aging;cell cycle arrest;cell cycle process;cell junction assembly;cell junction o…	adenyl nucleotide binding;adenyl ribonucleotide binding;ATP binding;binding;catalytic activity;enzyme binding;kinase activity;kinase binding;molecular transducer activity;nucleotide binding;phosphotransferase activity, alcohol group as acceptor;protein binding;protein kinase activity;protein kinase binding;protein serine/threonine kinase activity;purine nucleotide binding;purine ribonucleoside tr…	actin filament bundle;actomyosin;adherens junction;anchoring junction;axon part;cell body;cell junction;cell part;cell projection;cell projection part;cell-cell junction;cell-substrate adherens junction;cell-substrate junction;contractile fiber part;costamere;cytoplasm;cytoplasmic part;cytoskeletal part;cytosol;dendritic shaft;focal adhesion;intracellular organelle part;intracellular part;lamelli…	Bacterial invasion of epithelial cells;Endometrial cancer;Focal adhesion;PPAR signaling pathway	Ank;Ank_2;Pkinase_Tyr	2	2	2	4.1	4.1	4.1	54.611	3.7006	33379000	7467300	25912000	0	NaN	0	NaN	0	NaN	0	NaN	A0A0A0MTH3;Q13418-2;Q13418;A0A087WWY6;Q13418-3	A0A0A0MTH3;Q13418-2;Q13418;A0A087WWY6;Q13418-3	Integrin-linked protein kinase	ILK
NaN	NaN	NaN	NaN	NaN	NaN	NaN	NaN	NaN	NaN	NaN	NaN					acylglycerol metabolic process;anatomical structure development;behavior;behavioral defense response;behavioral fear response;biological regulation;cellular lipid metabolic process;cellular metabolic process;cellular process;cognition;defense response;developmental process;epidermis development;establishment of localization;fear response;glycerol ether metabolic process;glycerolipid metabolic pro…	benzodiazepine receptor binding;binding;carboxylic acid binding;coenzyme binding;cofactor binding;fatty acid binding;fatty-acyl-CoA binding;lipid binding;monocarboxylic acid binding;protein binding;protein dimerization activity;receptor binding	cell part;cytoplasmic part;endoplasmic reticulum;endoplasmic reticulum part;extracellular membrane-bounded organelle;extracellular organelle;extracellular region part;extracellular vesicular exosome;Golgi apparatus;intracellular membrane-bounded organelle;intracellular organelle;intracellular organelle part;intracellular part;membrane-bounded organelle;membrane-bounded vesicle;mitochondrion;organ…	PPAR signaling pathway	ACBP	1	1	1	16.5	16.5	16.5	11.15	3.8343	53422000	50955000	2467200	0	NaN	0	NaN	0	NaN	0	NaN	B8ZWD1;A0A0A0MTI5;P07108;P07108-3;P07108-2;P07108-6;P07108-4;P07108-5	B8ZWD1;A0A0A0MTI5;P07108;P07108-3;P07108-2;P07108-6;P07108-4;P07108-5	Acyl-CoA-binding protein	DBI
NaN	NaN	NaN	3.3846	NaN	NaN	NaN	4.33964	NaN	NaN	NaN	NaN					acyl-CoA biosynthetic process;acyl-CoA metabolic process;acylglycerol biosynthetic process;acylglycerol metabolic process;biosynthetic process;carboxylic acid biosynthetic process;carboxylic acid metabolic process;cellular biosynthetic process;cellular ketone metabolic process;cellular lipid metabolic process;cellular metabolic process;cellular process;coenzyme biosynthetic process;coenzyme metab…	catalytic activity;fatty acid elongase activity;fatty acid synthase activity;transferase activity;transferase activity, transferring acyl groups;transferase activity, transferring acyl groups other than amino-acyl groups	cell body;cell part;cell projection;cytoplasmic part;dendrite;endoplasmic reticulum;endoplasmic reticulum membrane;endoplasmic reticulum part;integral to membrane;intracellular membrane-bounded organelle;intracellular organelle;intracellular organelle part;intracellular part;intrinsic to membrane;membrane;membrane part;membrane-bounded organelle;neuron projection;neuronal cell body;organelle;orga…	Biosynthesis of unsaturated fatty acids	ELO	2	2	2	8.4	8.4	8.4	30.742	20.271	287680000	16579000	271100000	0	NaN	0	3.2846	0	4.23964	0	NaN	A0A0A0MTI6;Q9NYP7;Q9NYP7-2;Q9NYP7-3	A0A0A0MTI6;Q9NYP7;Q9NYP7-2;Q9NYP7-3	Elongation of very long chain fatty acids protein;Elongation of very long chain fatty acids protein 5	ELOVL5
NaN	NaN	NaN	NaN	NaN	NaN	NaN	NaN	NaN	NaN	NaN	NaN					biological regulation;catabolic process;cell cycle arrest;cell cycle process;cellular catabolic process;cellular macromolecule catabolic process;cellular macromolecule metabolic process;cellular metabolic process;cellular process;cellular protein metabolic process;cellular response to chemical stimulus;cellular response to hypoxia;cellular response to oxygen levels;cellular response to stimulus;c…	binding;enzyme binding;protein binding;ubiquitin protein ligase binding	cell part;Cul2-RING ubiquitin ligase complex;cullin-RING ubiquitin ligase complex;cytoplasmic part;cytoplasmic ubiquitin ligase complex;cytosol;intracellular non-membrane-bounded organelle;intracellular organelle;intracellular organelle part;intracellular part;macromolecular complex;non-membrane-bounded organelle;nuclear part;nucleolus;nucleoplasm;organelle;organelle part;protein complex;ubiquiti…	Pathways in cancer;Renal cell carcinoma;Ubiquitin mediated proteolysis	Cullin;Cullin_Nedd8	2	2	2	2.9	2.9	2.9	88.505	2.3091	18452000	1224500	17227000	0	NaN	0	NaN	0	NaN	0	NaN	A0A0A0MTN0;Q13617;Q13617-2;Q5T2B5	A0A0A0MTN0;Q13617;Q13617-2;Q5T2B5	Cullin-2	CUL2
0.129349	0.0807941	NaN	0.540127	0.192194	NaN	-0.0612249	-0.262434	NaN	NaN	0.535655	NaN					adherens junction organization;anatomical structure formation involved in morphogenesis;angiogenesis;biological adhesion;biological regulation;calcium-dependent cell-cell adhesion;cell adhesion;cell junction assembly;cell junction organization;cell migration;cell motility;cell projection assembly;cell projection organization;cell proliferation;cell-cell adhesion;cell-cell junction organization;ce…	adiponectin binding;binding;cadherin binding;calcium ion binding;cation binding;cell adhesion molecule binding;hormone binding;ion binding;lipoprotein particle binding;low-density lipoprotein particle binding;metal ion binding;protein binding;protein-lipid complex binding	adherens junction;anchored to membrane;anchoring junction;caveola;cell junction;cell part;cell projection;cell-substrate adherens junction;cell-substrate junction;cytoplasm;external side of plasma membrane;extracellular membrane-bounded organelle;extracellular organelle;extracellular region part;extracellular space;extracellular vesicular exosome;focal adhesion;intracellular part;intrinsic to mem…		Cadherin;Cadherin_pro	4	4	4	7.6	7.6	7.6	76.968	63.28	1936400000	1072500000	863890000	0.0610319	0.00507151	0.433508	0.26616	0.631638	-0.26183	0	0.435655	A0A0A0MTR1;P55290;P55290-4;A0A087X0X6;P55290-5;P55290-3;P55290-2	A0A0A0MTR1;P55290;P55290-4;A0A087X0X6;P55290-5;P55290-3;P55290-2	Cadherin-13	CDH13
NaN	NaN	NaN	NaN	NaN	NaN	NaN	NaN	NaN	NaN	NaN	NaN					alcohol biosynthetic process;alcohol catabolic process;alcohol metabolic process;aldehyde biosynthetic process;aldehyde catabolic process;anatomical structure formation involved in morphogenesis;angiogenesis;behavior;biological regulation;biosynthetic process;carbohydrate biosynthetic process;carbohydrate catabolic process;carbohydrate metabolic process;catabolic process;cellular aldehyde metabol…	binding;carbohydrate binding;catalytic activity;glucose-6-phosphate isomerase activity;intramolecular oxidoreductase activity;intramolecular oxidoreductase activity, interconverting aldoses and ketoses;intramolecular transferase activity;isomerase activity;monosaccharide binding;sugar binding	cell part;cell projection;cytoplasm;cytoplasmic part;cytosol;extracellular membrane-bounded organelle;extracellular organelle;extracellular region part;extracellular space;extracellular vesicular exosome;intracellular organelle part;intracellular part;membrane;membrane-bounded organelle;membrane-bounded vesicle;neuron projection;nuclear part;nucleoplasm;organelle;organelle part;plasma membrane;ve…	Amino sugar and nucleotide sugar metabolism;Glycolysis / Gluconeogenesis;Pentose phosphate pathway;Starch and sucrose metabolism	PGI	2	2	1	10.1	10.1	7	53.401	75.002	87913000	87913000	0	0	NaN	0	NaN	0	NaN	0	NaN	K7EQ48;A0A0A0MTS2;P06744;K7ERC6;K7ENA0;A0A0J9YXP8;A0A0J9YYH3;P06744-2	K7EQ48;A0A0A0MTS2;P06744;K7ERC6;K7ENA0;A0A0J9YXP8;A0A0J9YYH3;P06744-2	Glucose-6-phosphate isomerase	GPI
NaN	NaN	NaN	NaN	NaN	NaN	-0.263404	NaN	0.0539454	NaN	NaN	NaN					actin cytoskeleton organization;actin filament organization;actin filament-based movement;actin filament-based process;actin-mediated cell contraction;actin-myosin filament sliding;actomyosin structure organization;adult heart development;anatomical structure development;anatomical structure formation involved in morphogenesis;anatomical structure morphogenesis;biological regulation;blood coagula…	actin binding;actin filament binding;actinin binding;adenyl nucleotide binding;adenyl ribonucleotide binding;alpha-actinin binding;ATP binding;binding;calcium ion binding;calmodulin binding;catalytic activity;cation binding;cytoskeletal protein binding;enzyme binding;identical protein binding;ion binding;kinase activity;kinase binding;metal ion binding;muscle alpha-actinin binding;nucleotide bind…	cell part;chromosome;condensed chromosome;condensed nuclear chromosome;contractile fiber part;cytoplasmic part;cytoskeletal part;cytosol;extracellular membrane-bounded organelle;extracellular organelle;extracellular region;extracellular region part;extracellular vesicular exosome;I band;intracellular non-membrane-bounded organelle;intracellular organelle;intracellular organelle part;intracellular…	Dilated cardiomyopathy;Hypertrophic cardiomyopathy (HCM)	fn3;I-set;Pkinase;PPAK;Titin_Z	5	5	5	0.2	0.2	0.2	3994.6	2.9636	5347800000	3360900000	1986900000	0	NaN	0	NaN	0.377011	-0.204729	0	NaN	A0A0A0MTS7;Q8WZ42-11;Q8WZ42-4;Q8WZ42-7;Q8WZ42-2;Q8WZ42;Q8WZ42-8;Q8WZ42-13;Q8WZ42-12;A0A0A0MRA3;Q8WZ42-3;Q8WZ42-10;Q8WZ42-9;Q8WZ42-5	A0A0A0MTS7;Q8WZ42-11;Q8WZ42-4;Q8WZ42-7;Q8WZ42-2;Q8WZ42;Q8WZ42-8;Q8WZ42-13;Q8WZ42-12;A0A0A0MRA3;Q8WZ42-3;Q8WZ42-10;Q8WZ42-9;Q8WZ42-5	Titin	TTN
NaN	NaN	NaN	NaN	NaN	NaN	NaN	1.43002	1.16208	NaN	NaN	NaN					actin cytoskeleton organization;actin filament organization;actin filament polymerization;actin filament-based process;actin polymerization or depolymerization;biological regulation;cellular component assembly;cellular component assembly at cellular level;cellular component organization;cellular component organization at cellular level;cellular component organization or biogenesis;cellular compon…	actin binding;binding;cytoskeletal protein binding;protein binding	cell part;cytoplasmic membrane-bounded vesicle;cytoplasmic part;cytoplasmic vesicle;cytosol;extrinsic to membrane;extrinsic to mitochondrial inner membrane;extrinsic to organelle membrane;Golgi apparatus;Golgi apparatus part;Golgi membrane;integral to membrane;intracellular membrane-bounded organelle;intracellular organelle;intracellular organelle lumen;intracellular organelle part;intracellular …		DUF1900;WD40	2	2	2	24	24	24	14.013	19.166	67785000	25853000	41932000	0	NaN	0	NaN	1.14867	1.19605	0	NaN	I3L1U7;I3L0X9;I3L3T0;P57737-3;A0A0A6YYL4;Q9Y3D7	I3L1U7;I3L0X9;I3L3T0;P57737-3;A0A0A6YYL4;Q9Y3D7	Coronin;Mitochondrial import inner membrane translocase subunit TIM16	PAM16;CORO7-PAM16
NaN	NaN	NaN	NaN	NaN	NaN	NaN	NaN	NaN	NaN	NaN	NaN					alcohol biosynthetic process;alcohol catabolic process;alcohol metabolic process;aldehyde biosynthetic process;biological regulation;biosynthetic process;carbohydrate biosynthetic process;carbohydrate catabolic process;carbohydrate metabolic process;catabolic process;cellular aldehyde metabolic process;cellular biosynthetic process;cellular carbohydrate biosynthetic process;cellular carbohydrate …	binding;catalytic activity;cation binding;cofactor binding;identical protein binding;ion binding;metal ion binding;protein binding;protein dimerization activity;protein homodimerization activity;transferase activity;transferase activity, transferring aldehyde or ketonic groups;transketolase activity	cell part;cytoplasmic part;cytosol;extracellular membrane-bounded organelle;extracellular organelle;extracellular region part;extracellular vesicular exosome;intracellular membrane-bounded organelle;intracellular organelle;intracellular organelle part;intracellular part;membrane-bounded organelle;membrane-bounded vesicle;microbody;nuclear part;nucleoplasm;nucleus;organelle;organelle part;peroxiso…	Biosynthesis of ansamycins;Carbon fixation in photosynthetic organisms;Pentose phosphate pathway	Transket_pyr;Transketolase_C;Transketolase_N	2	2	2	5.9	5.9	5.9	49.91	64.479	51737000	51737000	0	0	NaN	0	NaN	0	NaN	0	NaN	A0A0B4J1R6;P29401;P29401-2	A0A0B4J1R6;P29401;P29401-2	Transketolase	TKT
-2.15547	NaN	NaN	NaN	NaN	NaN	-2.70162	NaN	-1.9167	NaN	NaN	NaN									V-set	3	2	2	24.4	18.5	18.5	12.926	11.38	1436600000	1101300000	335300000	0	-2.25547	0	NaN	0.987986	-2.40916	0	NaN	A0A0B4J1V0;A0A087WWF0;A0A0G2JN55;A0A087WW89;A0A087WU91;S4R3C0;A0A0C4DH42;A0A0C4DH36;A0A0A0MS11;A0A087WSX4;A0A075B7F1;A0A0J9YY99;A0A0J9YVT0;A0A0B4J2B7;A0A0B4J1V3;A0A0B4J1X8;A0A075B6Q5;A0A0B4J1Y9;A0A0B4J1V6;A0A0A0MS15;P01763;P01767;P01765;P01766;P01771;P01768;P01762;P01772	A0A0B4J1V0		IGHV3-15
0.791772	1.016	1.67052	0.37128	0.439676	0.478609	-0.362956	-0.292546	-0.198229	-0.588726	-0.389546	-0.272594					biological regulation;biosynthetic process;cellular biosynthetic process;cellular macromolecule biosynthetic process;cellular macromolecule metabolic process;cellular metabolic process;cellular nitrogen compound metabolic process;cellular process;establishment of localization;establishment of localization in cell;establishment of RNA localization;gene expression;intracellular transport;macromolec…	binding;cation binding;ion binding;metal ion binding;nucleic acid binding;nucleotide binding;transition metal ion binding;zinc ion binding	cell part;cytoplasm;extracellular membrane-bounded organelle;extracellular organelle;extracellular region part;extracellular vesicular exosome;intracellular membrane-bounded organelle;intracellular organelle;intracellular organelle part;intracellular part;membrane-bounded organelle;membrane-bounded vesicle;nuclear part;nucleoplasm;nucleus;organelle;organelle part;vesicle	Spliceosome	RRM_1;zf-CCHC	10	9	9	61.3	61.3	61.3	15.763	85.196	50535000000	9062800000	41472000000	1.24641	1.05943	2.04946	0.329855	1.82247	-0.384577	1.51684	-0.516955	A0A0B4J1Z1;C9JAB2;Q16629-3;Q16629-2;Q16629-4;Q16629;F8WEA1	A0A0B4J1Z1;C9JAB2;Q16629-3;Q16629-2;Q16629-4;Q16629	Serine/arginine-rich splicing factor 7	SRSF7
NaN	NaN	NaN	NaN	NaN	NaN	NaN	NaN	-0.729603	NaN	NaN	NaN										2	2	2	17.1	17.1	17.1	14.234	7.1486	108730000	63053000	45678000	0	NaN	0	NaN	0	-0.829603	0	NaN	A0A0B4J220;E9PLD3;E9PRG8	A0A0B4J220;E9PLD3;E9PRG8	Uncharacterized protein C11orf98	C11orf98
NaN	NaN	NaN	NaN	NaN	NaN	NaN	NaN	NaN	NaN	NaN	NaN					anatomical structure development;apoptosis;biological regulation;blastocyst development;carbohydrate metabolic process;cell death;cellular carbohydrate metabolic process;cellular macromolecule metabolic process;cellular metabolic process;cellular process;cellular protein metabolic process;death;developmental process;glycosylation;macromolecule glycosylation;macromolecule metabolic process;macromo…	catalytic activity;dolichyl-diphosphooligosaccharide-protein glycotransferase activity;oligosaccharyl transferase activity;transferase activity;transferase activity, transferring glycosyl groups;transferase activity, transferring hexosyl groups	cell part;cytoplasmic part;endoplasmic reticulum membrane;endoplasmic reticulum part;extracellular membrane-bounded organelle;extracellular organelle;extracellular region part;extracellular vesicular exosome;integral to membrane;intracellular organelle part;intracellular part;intrinsic to membrane;macromolecular complex;membrane;membrane part;membrane-bounded organelle;membrane-bounded vesicle;ol…	N-Glycan biosynthesis;Protein processing in endoplasmic reticulum;Various types of N-glycan biosynthesis	DAD	2	2	2	33.8	33.8	33.8	7.2883	3.1717	13645000	3785300	9860100	0	NaN	0	NaN	0	NaN	0	NaN	F5H895;A0A0B4J239;F5GXX5;P61803	F5H895;A0A0B4J239;F5GXX5;P61803	Dolichyl-diphosphooligosaccharide--protein glycosyltransferase subunit DAD1	DAD1
NaN	NaN	NaN	NaN	NaN	NaN	NaN	NaN	NaN	NaN	NaN	NaN					axon guidance;cell cycle phase;cell cycle process;cellular component assembly;cellular component assembly at cellular level;cellular component organization;cellular component organization at cellular level;cellular component organization or biogenesis;cellular component organization or biogenesis at cellular level;cellular macromolecular complex assembly;cellular macromolecular complex subunit or…	binding;catalytic activity;G-protein coupled receptor activity;GTP binding;GTPase activity;guanyl nucleotide binding;guanyl ribonucleotide binding;hydrolase activity;hydrolase activity, acting on acid anhydrides;hydrolase activity, acting on acid anhydrides, in phosphorus-containing anhydrides;molecular transducer activity;nucleoside-triphosphatase activity;nucleotide binding;peptide binding;puri…	axon;cell body;cell part;cell periphery;cell projection;cytoplasm;cytoskeletal part;dendrite;extracellular membrane-bounded organelle;extracellular organelle;extracellular region part;extracellular vesicular exosome;integral to membrane;intracellular membrane-bounded organelle;intracellular organelle;intracellular organelle part;intracellular part;intrinsic to membrane;macromolecular complex;memb…	Gap junction;Pathogenic Escherichia coli infection;Phagosome	7tm_1;Tubulin;Tubulin_C	18	3	3	23.6	6.4	6.4	88.381	8.3958	156180000	13207000	142970000	0	NaN	0	NaN	0	NaN	0	NaN	A0A0B4J269;Q13509;Q13509-2;G3V2A3;G3V5W4;G3V2R8;G3V3R4;G3V2N6	A0A0B4J269;Q13509;Q13509-2	Tubulin beta-3 chain	TUBB3
NaN	NaN	NaN	NaN	NaN	NaN	NaN	NaN	NaN	NaN	NaN	NaN					cellular process;ER to Golgi vesicle-mediated transport;establishment of localization;establishment of localization in cell;Golgi vesicle transport;intracellular transport;transport;vesicle-mediated transport		cell part;cytoplasm;cytoplasmic part;endoplasmic reticulum;Golgi apparatus;intracellular;intracellular membrane-bounded organelle;intracellular organelle;intracellular part;membrane-bounded organelle;organelle;perinuclear region of cytoplasm		Sedlin_N	2	2	2	30.7	30.7	30.7	8.721	3.2095	33116000	7358500	25758000	0	NaN	0	NaN	0	NaN	0	NaN	H3BPN3;A0A0B4J286;A0A0B4J294;H3BP13;Q9UL33-2;Q9UL33;H3BUK6	H3BPN3;A0A0B4J286;A0A0B4J294;H3BP13;Q9UL33-2;Q9UL33;H3BUK6	Trafficking protein particle complex subunit 2-like protein	TRAPPC2L
NaN	NaN	NaN	4.61153	4.03069	3.95065	NaN	NaN	NaN	NaN	NaN	NaN		+			alcohol metabolic process;biosynthetic process;cellular metabolic process;cellular process;cholesterol biosynthetic process;cholesterol biosynthetic process via 24,25-dihydrolanosterol;cholesterol metabolic process;demethylation;lipid biosynthetic process;lipid metabolic process;metabolic process;one-carbon metabolic process;primary metabolic process;small molecule metabolic process;steroid biosy…	binding;catalytic activity;cation binding;demethylase activity;heme binding;ion binding;iron ion binding;metal ion binding;monooxygenase activity;oxidoreductase activity;oxidoreductase activity, acting on paired donors, with incorporation or reduction of molecular oxygen;oxidoreductase activity, acting on paired donors, with incorporation or reduction of molecular oxygen, NADH or NADPH as one don…	cell part;cytoplasmic part;endoplasmic reticulum;endoplasmic reticulum membrane;endoplasmic reticulum part;integral to membrane;intracellular membrane-bounded organelle;intracellular organelle;intracellular organelle part;intracellular part;intrinsic to membrane;membrane;membrane part;membrane-bounded organelle;organelle;organelle membrane;organelle part	Steroid biosynthesis	p450	23	23	23	61.1	61.1	61.1	57.278	206.82	5830700000	108680000	5722000000	0	NaN	2.58963	4.09762	0	NaN	0	NaN	A0A0C4DFL7;Q16850;Q16850-2;H7C0D0;C9IYR8	A0A0C4DFL7;Q16850;Q16850-2	Lanosterol 14-alpha demethylase	CYP51A1
NaN	NaN	2.68894	0.535257	NaN	NaN	NaN	5.45828	0.62854	NaN	NaN	NaN							cell part;integral to membrane;intrinsic to membrane;membrane part		EMP70	6	6	6	12	12	12	72.54	23.524	307820000	72845000	234980000	0	2.58894	0	0.435257	0.359115	2.94341	0	NaN	A0A0C4DFM1;Q92544;F8WCN2;F2Z2L1	A0A0C4DFM1;Q92544	Transmembrane 9 superfamily member 4	TM9SF4
NaN	NaN	NaN	NaN	NaN	NaN	NaN	NaN	0.0378742	NaN	NaN	NaN					activation of NF-kappaB-inducing kinase activity;activation of protein kinase activity;anatomical structure development;apoptosis;biological regulation;cell death;cellular process;cellular response to stimulus;death;developmental process;multicellular organismal process;organ development;positive regulation of binding;positive regulation of biological process;positive regulation of catalytic acti…	acid-amino acid ligase activity;binding;catalytic activity;cation binding;cytokine receptor binding;DNA binding;enzyme binding;ion binding;ligase activity;ligase activity, forming carbon-nitrogen bonds;metal ion binding;nucleic acid binding;protein binding;protein domain specific binding;receptor binding;small conjugating protein ligase activity;thioesterase binding;transition metal ion binding;t…	cell junction;cell part;cell-cell junction;cytoplasm;cytoplasmic part;cytoskeleton;intracellular membrane-bounded organelle;intracellular non-membrane-bounded organelle;intracellular organelle;intracellular part;membrane;membrane-bounded organelle;non-membrane-bounded organelle;nucleus;occluding junction;organelle;perinuclear region of cytoplasm;plasma membrane;tight junction	Pathways in cancer;Small cell lung cancer	MATH;zf-C3HC4	3	3	3	19	19	19	22.488	2.9327	34503000	22002000	12501000	0	NaN	0	NaN	0	-0.0621258	0	NaN	A0A0C4DFM9;Q9BUZ4-2;Q9BUZ4;J9JIG0;F6SA91;K7EJG7;K7ER49;Q2KJU6;C9JJ10	A0A0C4DFM9;Q9BUZ4-2;Q9BUZ4;J9JIG0;F6SA91	TNF receptor-associated factor 4	TRAF4
NaN	NaN	NaN	NaN	NaN	NaN	NaN	NaN	-0.457831	NaN	0.361656	NaN					actin cytoskeleton organization;actin filament organization;actin filament-based process;activation of protein kinase activity;adaptive immune response;adaptive immune response based on somatic recombination of immune receptors built from immunoglobulin superfamily domains;amyloid precursor protein metabolic process;anatomical structure development;anatomical structure morphogenesis;axon guidance…	binding;catalytic activity;channel regulator activity;cytoskeletal protein binding;enzyme binding;glutamate receptor binding;guanylate kinase activity;hydrolase activity;hydrolase activity, acting on ester bonds;ion channel binding;ionotropic glutamate receptor binding;kinase activity;kinase binding;L27 domain binding;mitogen-activated protein kinase kinase binding;nucleobase-containing compound …	axon part;basal lamina;basolateral plasma membrane;cell junction;cell part;cell projection membrane;cell projection part;cell-cell contact zone;cell-cell junction;cytoplasm;cytoplasmic part;cytoskeletal part;cytosol;endoplasmic reticulum;endoplasmic reticulum membrane;endoplasmic reticulum part;extracellular matrix part;extracellular membrane-bounded organelle;extracellular organelle;extracellula…	T cell receptor signaling pathway	Guanylate_kin;L27_1;MAGUK_N_PEST;PDZ;PDZ_assoc;SH3_1	5	5	5	9.2	9.2	9.2	99.813	14.927	191780000	114850000	76928000	0	NaN	0	NaN	0	-0.557831	0	0.261656	A0A0C4DFT3;Q12959-8;Q12959-9;Q12959-5;Q12959-3;Q12959-6;Q12959-4;Q12959;Q12959-7;Q12959-2;H7C166;B4E2H8;E7EQD7;C9IYP1;H7C325;F8W750;B5MCC5;B7Z264;E9PIW2;B7Z2T4;E9PN83;Q15700-5;Q15700-3;Q15700;Q15700-4;Q15700-2	A0A0C4DFT3;Q12959-8;Q12959-9;Q12959-5;Q12959-3;Q12959-6;Q12959-4;Q12959;Q12959-7;Q12959-2	Disks large homolog 1	DLG1
-0.410697	-0.358084	-0.433117	0.358059	0.364124	0.31603	-0.238868	-0.264911	-0.0451337	0.0328061	-0.0887303	-0.111726	+	+			biological adhesion;biosynthetic process;catabolic process;cell adhesion;cellular biosynthetic process;cellular catabolic process;cellular component assembly;cellular component assembly at cellular level;cellular component disassembly;cellular component disassembly at cellular level;cellular component organization;cellular component organization at cellular level;cellular component organization o…	binding;laminin receptor activity;receptor activity;ribonucleoprotein binding;ribosome binding;structural constituent of ribosome;structural molecule activity	90S preribosome;cell part;cytoplasm;cytoplasmic part;cytosol;cytosolic small ribosomal subunit;extracellular membrane-bounded organelle;extracellular organelle;extracellular region part;extracellular vesicular exosome;intracellular membrane-bounded organelle;intracellular organelle;intracellular organelle part;intracellular part;macromolecular complex;membrane;membrane-bounded organelle;membrane-…	Ribosome	Ribosomal_S2	14	14	14	70.8	70.8	70.8	29.505	226.86	9193000000	5703800000	3489200000	2.70617	-0.500632	2.42534	0.246071	1.25878	-0.282971	1.13249	-0.155883	C9J9K3;A0A0C4DG17;P08865;F8WD59	C9J9K3;A0A0C4DG17;P08865;F8WD59	40S ribosomal protein SA	RPSA
0.280956	0.394404	0.302407	0.802069	0.128953	0.419539	NaN	-0.498423	-0.0263373	-0.370583	-0.267896	NaN					biological regulation;cell differentiation;cellular component organization;cellular component organization at cellular level;cellular component organization or biogenesis;cellular component organization or biogenesis at cellular level;cellular developmental process;cellular process;cytoskeletal anchoring at nuclear membrane;cytoskeleton organization;developmental process;establishment of localiza…	actin binding;actin filament binding;binding;cytoskeletal protein binding;identical protein binding;lamin binding;protein binding;protein dimerization activity;protein homodimerization activity	cell part;contractile fiber part;cytoplasm;cytoplasmic part;cytoskeleton;envelope;Golgi apparatus;integral to membrane;intracellular membrane-bounded organelle;intracellular non-membrane-bounded organelle;intracellular organelle;intracellular organelle part;intracellular part;intrinsic to membrane;macromolecular complex;membrane;membrane part;membrane-bounded organelle;non-membrane-bounded organe…		CH;KASH;Spectrin	11	11	11	1.5	1.5	1.5	964.83	18.914	7052200000	4255800000	2796400000	1.63998	0.225922	0.669116	0.350187	0.434691	-0.36238	1.11025	-0.419239	E7ENN3;A0A0C4DG40;Q8NF91-4;Q8NF91;Q8NF91-7;F5GXQ8;Q8NF91-5;Q8NF91-6;Q8NF91-10;F5H422;F5H4Q0;F5GYQ7;Q8NF91-8;Q8NF91-2	E7ENN3;A0A0C4DG40;Q8NF91-4;Q8NF91;Q8NF91-7;F5GXQ8;Q8NF91-5;Q8NF91-6;Q8NF91-10;F5H422	Nesprin-1	SYNE1
NaN	NaN	NaN	NaN	NaN	NaN	NaN	NaN	NaN	NaN	NaN	NaN					adult behavior;adult locomotory behavior;adult walking behavior;anatomical structure development;behavior;biological regulation;catabolic process;cell communication;cell development;cellular catabolic process;cellular component organization;cellular component organization at cellular level;cellular component organization or biogenesis;cellular component organization or biogenesis at cellular leve…	binding;catalytic activity;endopeptidase activity;hydrolase activity;peptidase activity;peptidase activity, acting on L-amino acid peptides;protein binding;serine hydrolase activity;serine-type endopeptidase activity;serine-type peptidase activity;unfolded protein binding	CD40 receptor complex;cell part;chromatin;chromosomal part;cytoplasmic part;cytoskeleton;cytosol;endoplasmic reticulum;endoplasmic reticulum membrane;endoplasmic reticulum part;internal side of plasma membrane;intracellular membrane-bounded organelle;intracellular non-membrane-bounded organelle;intracellular organelle;intracellular organelle part;intracellular part;macromolecular complex;membrane…	Parkinson's disease	PDZ_2	4	4	4	10.2	10.2	10.2	45.112	5.0028	47999000	7640900	40358000	0	NaN	0	NaN	0	NaN	0	NaN	A0A0C4DG44;O43464-2;O43464-4;O43464-3;O43464	A0A0C4DG44;O43464-2;O43464-4;O43464-3;O43464	Serine protease HTRA2, mitochondrial	HTRA2
NaN	NaN	NaN	NaN	NaN	NaN	NaN	NaN	NaN	NaN	NaN	NaN					anatomical structure formation involved in morphogenesis;cell cycle;cell cycle process;cellular component organization;cellular component organization at cellular level;cellular component organization or biogenesis;cellular component organization or biogenesis at cellular level;cellular process;developmental process;establishment of cell polarity;establishment or maintenance of cell polarity;G2/M…		cell junction;cell part;cell-cell junction;centriole;centrosome;cytoplasmic part;cytoskeletal part;cytosol;intracellular non-membrane-bounded organelle;intracellular organelle;intracellular organelle part;intracellular part;microtubule organizing center;microtubule organizing center part;non-membrane-bounded organelle;organelle;organelle part			1	1	1	4.2	4.2	4.2	48.116	3.7772	8281600	0	8281600	0	NaN	0	NaN	0	NaN	0	NaN	A0A0G2JR20;A0A0C4DG71;A0A0G2JQM2;A0A0G2JR50;Q86SQ7-3;Q86SQ7-4;Q86SQ7	A0A0G2JR20;A0A0C4DG71;A0A0G2JQM2;A0A0G2JR50;Q86SQ7-3;Q86SQ7-4;Q86SQ7	Serologically defined colon cancer antigen 8	SDCCAG8
[truncated: 2,262 more rows]

## Sheet: table legend
Column	Description
[truncated: 20 more rows]
