# Supplementary material for: Full length RTN3 regulates turnover of tubular endoplasmic reticulum via selective autophagy
Source: eLife. 2017 Jun 15;6:e25555. doi: 10.7554/eLife.25555 (PMC5517149; doi:10.7554/eLife.25555)
Supplement: Figure 5—source data 2. — IP-interactome analyses were performed using the SILAC labeling strategy in U2OS after 24-hr treatment with 1 µg/ml of doxycycline. Bafilomycin A1, 200 ng/ml, was added for 2 hr. Peptides with Log2 (Heavy/Light [H/L]) ratios ≥ 1 and a p value ≤ 0.05 were considered significantly enriched. DOI: http://dx.doi.org/10.7554/eLife.25555.021 [file elife-25555-fig5-data2.xlsx]

## Sheet: Figure 5 – source data 2
log2 Ratio H (RTN1C)/ L (HA-empty vector control) normalized RTN1C_01	log2 Ratio H (RTN1C)/ L (HA-empty vector control) normalized RTN1C_02	log2 Ratio H (RTN1C)/ L (HA-empty vector control) normalized RTN1C_03	log2 Ratio H (RTN2C)/ L (HA-empty vector control) normalized RTN2C_01	log2 Ratio H (RTN2C)/ L (HA-empty vector control) normalized RTN2C_02	log2 Ratio H (RTN2C)/ L (HA-empty vector control) normalized RTN2C_03	log2 Ratio H (RTN3A)/ L (HA-empty vector control) normalized RTN3A_01	log2 Ratio H (RTN3A)/ L (HA-empty vector control) normalized RTN3A_02	log2 Ratio H (RTN3A)/ L (HA-empty vector control) normalized RTN3A_03	log2 Ratio H (RTN4C)/ L (HA-empty vector control) normalized RTN4C_01	log2 Ratio H (RTN4C)/ L (HA-empty vector control) normalized RTN4C_02	log2 Ratio H (RTN4C)/ L (HA-empty vector control) normalized RTN4C_03	C: T-test Significant_RTN1C	C: T-test Significant_RTN2C	C: T-test Significant_RTN3A	C: T-test Significant_RTN4C	C: GOBP name	C: GOMF name	C: GOCC name	C: Pfam	C: KEGG name	Peptides	Razor + unique peptides	Unique peptides	Sequence coverage [%]	Unique + razor sequence coverage [%]	Unique sequence coverage [%]	Mol. weight [kDa]	Score	Intensity	Intensity L	Intensity H	-log10 p-value_RTN1C	log2 Ratio_RTN1C	-log10 p-value_RTN2C	log2 Ratio_RTN2C	-log10 p-value_RTN3A	log2 Ratio_RTN3A	-log10 p-value_RTN4C	log2 Ratio_RTN4C	Protein IDs	Majority protein IDs	Protein names	Gene names
4.00953	4.50767	4.4813	NaN	4.69098	5.60641	3.91753	4.29433	3.88039	3.95596	3.90043	4.30371			+	+	biological regulation;cell differentiation;cellular developmental process;cellular process;cellular response to stimulus;developmental process;establishment of localization;establishment of localization in cell;establishment of protein localization;intracellular protein transport;intracellular signal transduction;intracellular transport;metabolic process;nuclear transport;nucleocytoplasmic transp…	binding;catalytic activity;GTP binding;GTPase activity;guanyl nucleotide binding;guanyl ribonucleotide binding;hydrolase activity;hydrolase activity, acting on acid anhydrides;hydrolase activity, acting on acid anhydrides, in phosphorus-containing anhydrides;nucleoside-triphosphatase activity;nucleotide binding;purine nucleotide binding;purine ribonucleoside triphosphate binding;purine ribonucleo…	adherens junction;anchoring junction;cell junction;cell part;cell-substrate adherens junction;cell-substrate junction;cytoplasmic part;endoplasmic reticulum;extracellular membrane-bounded organelle;extracellular organelle;extracellular region part;extracellular vesicular exosome;focal adhesion;intracellular;intracellular membrane-bounded organelle;intracellular organelle;intracellular part;membra…	Ras	MAPK signaling pathway;Regulation of actin cytoskeleton;Tight junction	7	7	5	36.9	36.9	23.6	23.294	245.02	239690000	9694800	230000000	2.83609	4.23283	1.23989	5.04869	2.94706	3.93075	2.99253	3.95337	A0A0C4DGH2;P62070;P62070-4;E9PK85;P62070-3;P62070-2;E9PQK5;E9PQC5;E9PQ87	A0A0C4DGH2;P62070;P62070-4;E9PK85;P62070-3;P62070-2	Ras-related protein R-Ras2	RRAS2
1.68136	1.56818	2.13921	1.9581	1.76774	1.71677	2.09481	2.08277	2.27083	0.900336	NaN	1.07478			+		cellular component assembly;cellular component assembly at cellular level;cellular component organization;cellular component organization at cellular level;cellular component organization or biogenesis;cellular component organization or biogenesis at cellular level;cellular localization;cellular macromolecular complex assembly;cellular macromolecular complex subunit organization;cellular macromol…	structural constituent of nuclear pore;structural molecule activity	cell part;cytoplasmic membrane-bounded vesicle;cytoplasmic part;cytoplasmic vesicle;endoplasmic reticulum;extracellular membrane-bounded organelle;extracellular organelle;extracellular region part;extracellular vesicular exosome;integral to membrane;intracellular membrane-bounded organelle;intracellular organelle;intracellular organelle part;intracellular part;intrinsic to membrane;macromolecular…	UPF0121		6	6	6	24.8	24.8	24.8	25.223	31.132	95860000	23704000	72156000	1.9819	1.69625	2.73749	1.7142	3.05635	2.04947	1.20508	0.887557	D6RAA6;P57088;H0Y8N0;J3KN43;D6RBY2	D6RAA6;P57088;H0Y8N0	Transmembrane protein 33	TMEM33
NaN	1.0995	1.12697	NaN	1.65842	1.1135	2.3665	2.4598	2.44988	2.62779	2.58765	2.79338			+	+	axon guidance;biological adhesion;biological regulation;cell adhesion;cell surface receptor linked signaling pathway;cell-cell adhesion;cellular process;cellular response to stimulus;chemotaxis;enzyme linked receptor protein signaling pathway;ephrin receptor signaling pathway;establishment of localization;establishment of localization in cell;establishment of protein localization;establishment of…	binding;calcium ion binding;cation binding;ion binding;metal ion binding	actin filament bundle;actomyosin;apical part of cell;cell part;contractile fiber part;cytoplasmic part;cytoskeletal part;cytosol;extracellular membrane-bounded organelle;extracellular organelle;extracellular region part;extracellular vesicular exosome;intracellular organelle part;intracellular part;macromolecular complex;membrane-bounded organelle;membrane-bounded vesicle;myosin complex;myosin II…	EF-hand_1;EF-hand_7	Focal adhesion;Leukocyte transendothelial migration;Regulation of actin cytoskeleton;Tight junction	10	10	5	61	61	28.8	20.457	289.81	3159800000	418150000	2741600000	2.06394	1.01324	0.876422	1.28596	3.79099	2.32539	3.222	2.56961	J3QRS3;P19105;O14950;J3KTJ1	J3QRS3;P19105;O14950	Myosin regulatory light chain 12A;Myosin regulatory light chain 12B	MYL12A;MYL12B
1.16215	1.18504	1.18276	0.994145	0.824727	1.06592	1.09268	1.0251	NaN	2.17731	2.0643	1.88029	+			+	biological regulation;cellular component assembly;cellular component assembly at cellular level;cellular component organization;cellular component organization at cellular level;cellular component organization or biogenesis;cellular component organization or biogenesis at cellular level;cellular macromolecular complex assembly;cellular macromolecular complex subunit organization;cellular macromol…	acetyltransferase activity;catalytic activity;H4 histone acetyltransferase activity;histone acetyltransferase activity;lysine N-acetyltransferase activity;N-acetyltransferase activity;N-acyltransferase activity;transferase activity;transferase activity, transferring acyl groups;transferase activity, transferring acyl groups other than amino-acyl groups	cell part;chromatin;chromosomal part;cytoplasm;intracellular membrane-bounded organelle;intracellular organelle;intracellular organelle part;intracellular part;macromolecular complex;membrane-bounded organelle;nuclear chromatin;nuclear chromosome part;nuclear matrix;nuclear part;nucleoplasm;nucleus;organelle;organelle part;protein complex	Hat1_N		6	6	6	17.9	17.9	17.9	49.512	126.86	178700000	50712000	127990000	4.33979	1.07665	2.16643	0.861596	1.64927	0.95889	2.7026	1.94063	O14929;O14929-2;F8WEW1;F8W9G7	O14929;O14929-2	Histone acetyltransferase type B catalytic subunit	HAT1
1.19087	1.15737	1.53745	NaN	0.249749	NaN	NaN	NaN	NaN	NaN	NaN	NaN					cellular component assembly;cellular component assembly at cellular level;cellular component organization;cellular component organization at cellular level;cellular component organization or biogenesis;cellular component organization or biogenesis at cellular level;cellular macromolecular complex assembly;cellular macromolecular complex subunit organization;cellular process;macromolecular complex…	binding;GTP binding;guanyl nucleotide binding;guanyl ribonucleotide binding;nucleic acid binding;nucleotide binding;purine nucleotide binding;purine ribonucleoside triphosphate binding;purine ribonucleotide binding;ribonucleoprotein binding;ribonucleotide binding;ribosomal small subunit binding;RNA binding;rRNA binding	actin cytoskeleton;cell part;cytoplasm;cytoplasmic part;cytoskeleton;intermediate filament cytoskeleton;intracellular membrane-bounded organelle;intracellular non-membrane-bounded organelle;intracellular organelle;intracellular organelle lumen;intracellular organelle part;intracellular part;membrane;membrane-bounded organelle;membrane-enclosed lumen;mitochondrial inner membrane;mitochondrial matr…	MMR_HSR1		5	5	5	12.4	12.4	12.4	48.349	11.21	14412000	4863500	9548700	1.99245	1.19523	0	0.149749	0	NaN	0	NaN	O75616;J3QSB2;J3QRV9;O75616-2;J3QT61	O75616;J3QSB2;J3QRV9;O75616-2	GTPase Era, mitochondrial	ERAL1
1.40392	0.811964	1.42465	0.305912	0.326997	0.307195	0.205393	0.307895	0.0694271	-0.253756	-0.243404	-0.0531194					anatomical structure development;anatomical structure homeostasis;base-excision repair;biological regulation;biosynthetic process;cell cycle;cell cycle process;cell differentiation;cell proliferation;cellular biosynthetic process;cellular component organization;cellular component organization at cellular level;cellular component organization or biogenesis;cellular component organization or biogen…	binding;catalytic activity;chromatin binding;damaged DNA binding;dinucleotide insertion or deletion binding;DNA binding;DNA insertion or deletion binding;DNA N-glycosylase activity;DNA polymerase binding;DNA polymerase processivity factor activity;double-stranded DNA binding;enzyme binding;enzyme regulator activity;histone acetyltransferase binding;hydrolase activity;hydrolase activity, acting on…	cell part;centrosome;chromosomal part;cytoplasm;cytoplasmic part;cytoskeletal part;DNA replication factor C complex;extracellular membrane-bounded organelle;extracellular organelle;extracellular region part;extracellular vesicular exosome;intracellular membrane-bounded organelle;intracellular non-membrane-bounded organelle;intracellular organelle;intracellular organelle part;intracellular part;ma…	PCNA_C;PCNA_N	Base excision repair;Cell cycle;DNA replication;Mismatch repair;Nucleotide excision repair	9	9	9	44.4	44.4	44.4	28.768	84.026	168850000	76306000	92541000	1.50818	1.11351	2.99077	0.213368	0.514761	0.0942382	1.30902	-0.283426	P12004	P12004	Proliferating cell nuclear antigen	PCNA
2.87222	3.23675	4.26228	NaN	3.44864	3.50042	3.38239	4.27128	4.03817	4.10827	3.91867	3.87725			+	+	anatomical structure development;ATP biosynthetic process;ATP metabolic process;ATP synthesis coupled proton transport;biosynthetic process;cation transport;cellular biosynthetic process;cellular metabolic process;cellular nitrogen compound biosynthetic process;cellular nitrogen compound metabolic process;cellular process;developmental process;electron transport chain;energy coupled proton transp…	cation transmembrane transporter activity;hydrogen ion transmembrane transporter activity;inorganic cation transmembrane transporter activity;ion transmembrane transporter activity;monovalent inorganic cation transmembrane transporter activity;substrate-specific transmembrane transporter activity;substrate-specific transporter activity;transmembrane transporter activity;transporter activity	cell part;cytoplasmic part;extracellular membrane-bounded organelle;extracellular organelle;extracellular region part;extracellular vesicular exosome;intracellular membrane-bounded organelle;intracellular organelle;intracellular organelle lumen;intracellular organelle part;intracellular part;macromolecular complex;membrane;membrane part;membrane-bounded organelle;membrane-bounded vesicle;membrane…	Mt_ATP-synt_B	Alzheimer's disease;Huntington's disease;Oxidative phosphorylation;Parkinson's disease	8	8	8	40.5	40.5	40.5	22.275	164.03	387870000	55354000	332510000	1.82335	3.35708	2.31119	3.37453	2.31206	3.79728	3.47128	3.86807	Q5QNZ2;P24539	Q5QNZ2;P24539	ATP synthase F(0) complex subunit B1, mitochondrial	ATP5F1
1.06791	1.36109	1.24738	2.13149	2.0664	2.08804	1.94366	1.91911	2.03721	1.61363	2.01675	1.79098		+	+	+	anatomical structure development;apoptosis;biological regulation;biosynthetic process;cell death;cellular biosynthetic process;cellular component organization;cellular component organization or biogenesis;cellular macromolecule metabolic process;cellular metabolic process;cellular nitrogen compound metabolic process;cellular process;cellular response to stimulus;death;developmental process;establ…	binding;protein binding;protein N-terminus binding	adherens junction;anchoring junction;cell junction;cell part;cell-substrate adherens junction;cell-substrate junction;cytoplasm;cytoplasmic part;cytoplasmic vesicle membrane;cytoplasmic vesicle part;cytosol;extracellular membrane-bounded organelle;extracellular organelle;extracellular region part;extracellular vesicular exosome;focal adhesion;intracellular organelle part;intracellular part;macrom…	14-3-3	Cell cycle;Neurotrophin signaling pathway;Oocyte meiosis	12	8	8	48.6	34.7	34.7	27.764	146.86	173790000	41193000	132590000	2.24408	1.12546	4.03626	1.99531	3.43028	1.86666	2.33379	1.70712	P27348;E9PG15	P27348;E9PG15	14-3-3 protein theta	YWHAQ
4.70868	2.19469	5.07523	NaN	NaN	NaN	NaN	NaN	NaN	3.23073	NaN	NaN							cell part;extracellular membrane-bounded organelle;extracellular organelle;extracellular region part;extracellular vesicular exosome;integral to membrane;integral to plasma membrane;intrinsic to membrane;intrinsic to plasma membrane;membrane;membrane part;membrane-bounded organelle;membrane-bounded vesicle;organelle;plasma membrane;plasma membrane part;vesicle	Tetraspannin	p53 signaling pathway	2	2	2	12.4	12.4	12.4	26.818	29.287	73183000	4128600	69055000	1.30055	3.89287	0	NaN	0	NaN	0	3.13073	P27701-2;P27701	P27701-2;P27701	CD82 antigen	CD82
1.65434	1.14516	2.21428	2.28664	2.54463	2.38899	2.49797	2.34701	2.25828	2.16401	1.74962	2.37729			+		ATP biosynthetic process;ATP metabolic process;ATP synthesis coupled proton transport;biosynthetic process;cation transport;cellular biosynthetic process;cellular metabolic process;cellular nitrogen compound biosynthetic process;cellular nitrogen compound metabolic process;cellular process;electron transport chain;energy coupled proton transport, down electrochemical gradient;establishment of loc…	active transmembrane transporter activity;ATPase activity;ATPase activity, coupled;ATPase activity, coupled to movement of substances;ATPase activity, coupled to transmembrane movement of ions;ATPase activity, coupled to transmembrane movement of substances;catalytic activity;cation transmembrane transporter activity;cation-transporting ATPase activity;hydrogen ion transmembrane transporter activ…	cell part;cytoplasmic part;extracellular membrane-bounded organelle;extracellular organelle;extracellular region part;extracellular vesicular exosome;intracellular membrane-bounded organelle;intracellular organelle;intracellular organelle lumen;intracellular organelle part;intracellular part;macromolecular complex;membrane;membrane part;membrane-bounded organelle;membrane-bounded vesicle;membrane…	ATP-synt	Alzheimer's disease;Huntington's disease;Oxidative phosphorylation;Parkinson's disease	10	10	1	34.3	34.3	4	32.881	120.3	448100000	103200000	344900000	1.4376	1.57126	2.97653	2.30676	3.02204	2.26775	2.07535	1.99697	P36542-2	P36542-2	ATP synthase subunit gamma, mitochondrial	ATP5C1
2.9996	3.36639	2.92104	3.69477	3.15236	NaN	NaN	NaN	NaN	NaN	NaN	NaN					alcohol metabolic process;biosynthetic process;cellular biosynthetic process;cellular lipid metabolic process;cellular metabolic process;cellular process;cholesterol biosynthetic process;cholesterol metabolic process;farnesyl diphosphate metabolic process;isoprenoid biosynthetic process;isoprenoid metabolic process;lipid biosynthetic process;lipid metabolic process;metabolic process;organophospha…	catalytic activity;farnesyl-diphosphate farnesyltransferase activity;farnesyltranstransferase activity;oxidoreductase activity;prenyltransferase activity;squalene synthase activity;transferase activity;transferase activity, transferring alkyl or aryl (other than methyl) groups	cell part;cytoplasmic part;endoplasmic reticulum;endoplasmic reticulum membrane;endoplasmic reticulum part;integral to membrane;intracellular membrane-bounded organelle;intracellular organelle;intracellular organelle part;intracellular part;intrinsic to membrane;membrane;membrane part;membrane-bounded organelle;organelle;organelle membrane;organelle part	SQS_PSY	Steroid biosynthesis	7	7	7	19.7	19.7	19.7	48.115	21.901	55946000	3215500	52731000	2.67937	2.99568	1.28539	3.32357	0	NaN	0	NaN	P37268;E9PNM1;P37268-4;P37268-3;P37268-2;P37268-5;E9PS69;E9PJG4	P37268;E9PNM1;P37268-4;P37268-3;P37268-2;P37268-5	Squalene synthase	FDFT1
NaN	1.13264	1.26376	1.38841	1.13711	1.27405	1.50848	1.44414	1.32372	1.21605	1.27435	NaN			+					MAGE;MAGE_N		5	5	5	15.5	15.5	15.5	34.899	8.4876	118220000	36171000	82051000	1.4207	1.0982	2.41393	1.16652	2.77862	1.32544	1.79046	1.1452	P43358;P43361;P43355;P43363;C9JZJ5;C9J9C2;C9JK50;C9JIR1;Q3SYA6;Q8TD91-2;A0A0A0MSA3;O60732-2;P43362;A2A368;A8MXT2;Q96M61;O15480;O60732	P43358;P43361	Melanoma-associated antigen 4;Melanoma-associated antigen 8	MAGEA4;MAGEA8
2.64978	2.34164	2.66439	2.41411	2.28158	2.24957	1.92884	2.04893	2.06243	2.30325	2.32147	2.43611		+	+	+	ATP biosynthetic process;ATP metabolic process;ATP synthesis coupled proton transport;biosynthetic process;cation transport;cellular biosynthetic process;cellular metabolic process;cellular nitrogen compound biosynthetic process;cellular nitrogen compound metabolic process;cellular process;electron transport chain;energy coupled proton transport, down electrochemical gradient;establishment of loc…	binding;cation transmembrane transporter activity;drug binding;hydrogen ion transmembrane transporter activity;hydrogen ion transporting ATP synthase activity, rotational mechanism;inorganic cation transmembrane transporter activity;ion transmembrane transporter activity;monovalent inorganic cation transmembrane transporter activity;substrate-specific transmembrane transporter activity;substrate-…	cell part;cytoplasmic part;extracellular membrane-bounded organelle;extracellular organelle;extracellular region part;extracellular vesicular exosome;intracellular membrane-bounded organelle;intracellular organelle;intracellular organelle part;intracellular part;macromolecular complex;membrane;membrane part;membrane-bounded organelle;membrane-bounded vesicle;mitochondrial inner membrane;mitochond…	OSCP	Alzheimer's disease;Huntington's disease;Oxidative phosphorylation;Parkinson's disease	11	11	11	66.2	66.2	66.2	23.277	99.962	728530000	127850000	600680000	2.73593	2.45194	3.28683	2.21508	3.308	1.9134	3.46815	2.25361	P48047;H7C0C1;H7C086;H7C068	P48047;H7C0C1	ATP synthase subunit O, mitochondrial	ATP5O
1.6832	1.62597	1.77303	NaN	2.23361	1.59979	0.0526941	0.017922	0.133695	0.234379	0.255803	0.217107					anatomical structure development;biological regulation;cell cycle;cell cycle process;cell differentiation;cellular component disassembly;cellular component disassembly at cellular level;cellular component organization;cellular component organization at cellular level;cellular component organization or biogenesis;cellular component organization or biogenesis at cellular level;cellular developmenta…	actin binding;beta-tubulin binding;binding;cytoskeletal protein binding;protein binding;tubulin binding	cell part;cytoplasmic part;cytoskeletal part;endoplasmic reticulum;envelope;integral to membrane;intracellular membrane-bounded organelle;intracellular organelle;intracellular organelle part;intracellular part;intrinsic to membrane;macromolecular complex;membrane;membrane part;membrane-bounded organelle;microtubule;nuclear envelope;nuclear inner membrane;nuclear membrane;nuclear outer membrane;nu…	LEM	Arrhythmogenic right ventricular cardiomyopathy (ARVC);Dilated cardiomyopathy;Hypertrophic cardiomyopathy (HCM)	9	9	9	46.5	46.5	46.5	28.994	256.62	347690000	140650000	207040000	3.14266	1.59407	0.958817	1.8167	0.346253	-0.0318963	2.17214	0.135763	P50402;Q5HY57;F8WEQ1	P50402;Q5HY57	Emerin	EMD
3.27541	3.76001	2.70463	1.67243	1.87176	1.77239	1.24336	1.44031	0.746829	1.60881	1.27017	1.42412					antigen processing and presentation;antigen processing and presentation of exogenous antigen;antigen processing and presentation of exogenous peptide antigen;antigen processing and presentation of exogenous peptide antigen via MHC class I;antigen processing and presentation of exogenous peptide antigen via MHC class I, TAP-dependent;antigen processing and presentation of peptide antigen;antigen p…	binding;epidermal growth factor binding;growth factor binding;hormone binding;protein binding	cell part;cytoplasmic part;cytosol;endoplasmic reticulum;endoplasmic reticulum membrane;endoplasmic reticulum part;endoplasmic reticulum Sec complex;integral to membrane;intracellular membrane-bounded organelle;intracellular organelle;intracellular organelle part;intracellular part;intrinsic to membrane;macromolecular complex;membrane;membrane part;membrane-bounded organelle;organelle;organelle m…	Sec61_beta	Phagosome;Protein export;Protein processing in endoplasmic reticulum;Vibrio cholerae infection	3	3	3	37.5	37.5	37.5	9.9743	22.83	130580000	28870000	101710000	2.03317	3.14668	2.92734	1.67219	1.43248	1.0435	2.27255	1.33437	P60468;S4R3B5	P60468	Protein transport protein Sec61 subunit beta	SEC61B
NaN	1.81225	1.80335	NaN	NaN	NaN	NaN	NaN	NaN	NaN	NaN	NaN					biological regulation;cellular component organization;cellular component organization or biogenesis;cellular process;cellular response to stimulus;intracellular signal transduction;positive regulation of actin filament polymerization;positive regulation of biological process;positive regulation of cell projection organization;positive regulation of cellular component organization;positive regulat…	binding;enzyme binding;GTPase binding;GTP-Rho binding;protein binding;Ras GTPase binding;Rho GTPase binding;small GTPase binding	actin cytoskeleton;adherens junction;anchoring junction;cell junction;cell part;cell-substrate adherens junction;cell-substrate junction;cytoplasm;cytoplasmic part;cytoskeleton;focal adhesion;Golgi apparatus;intracellular membrane-bounded organelle;intracellular non-membrane-bounded organelle;intracellular organelle;intracellular part;membrane;membrane-bounded organelle;non-membrane-bounded organ…	BORG_CEP;PBD		3	3	3	10.4	10.4	10.4	39.686	5.5074	2377300	450670	1926600	2.78017	1.7078	0	NaN	0	NaN	0	NaN	Q00587-2;Q00587;B0QYC6;B0QYC7;B0QYC8	Q00587-2;Q00587	Cdc42 effector protein 1	CDC42EP1
4.70995	4.61082	4.88147	NaN	NaN	NaN	NaN	NaN	NaN	NaN	NaN	NaN					acylglycerol metabolic process;anatomical structure development;anatomical structure formation involved in morphogenesis;angiogenesis;biological regulation;blood coagulation;body fluid secretion;calcium ion homeostasis;calcium ion transport;cation homeostasis;cation transport;caveola assembly;caveolin-mediated endocytosis;cell communication;cell differentiation;cell migration;cell motility;cell s…	binding;channel inhibitor activity;channel regulator activity;cholesterol binding;enzyme activator activity;enzyme binding;enzyme regulator activity;identical protein binding;inward rectifier potassium channel inhibitor activity;ion channel binding;ion channel inhibitor activity;kinase binding;lipid binding;nitric-oxide synthase binding;patched binding;peptidase activator activity;peptidase regul…	acrosomal membrane;adherens junction;anchoring junction;apical plasma membrane;basolateral plasma membrane;caveola;cell cortex;cell junction;cell part;cell projection;cell-substrate adherens junction;cell-substrate junction;cilium;cytoplasmic part;cytoplasmic vesicle;cytoplasmic vesicle membrane;cytoplasmic vesicle part;early endosome membrane;endocytic vesicle membrane;endoplasmic reticulum;endo…	Caveolin	Bacterial invasion of epithelial cells;Endocytosis;Focal adhesion;Viral myocarditis	6	6	3	34.8	34.8	19.1	20.471	29.844	162560000	7078100	155480000	3.53625	4.63408	0	NaN	0	NaN	0	NaN	Q03135;E9PCT5;P56539	Q03135;E9PCT5	Caveolin-1;Caveolin	CAV1
7.47371	7.46074	7.42761	4.63917	5.89054	5.38253	7.83434	7.86895	8.07505	5.70221	5.37542	4.23932	+		+		cell differentiation;cellular developmental process;cellular process;developmental process;neuron differentiation		cell part;cytoplasmic part;endoplasmic reticulum membrane;endoplasmic reticulum part;integral to endoplasmic reticulum membrane;integral to membrane;integral to organelle membrane;intracellular organelle part;intracellular part;intrinsic to endoplasmic reticulum membrane;intrinsic to membrane;intrinsic to organelle membrane;membrane;membrane part;organelle membrane;organelle part	Reticulon		13	13	5	15.5	15.5	9	83.617	178.12	37078000000	218380000	36859000000	5.45797	7.35402	2.31517	5.20408	4.03546	7.82611	2.11056	5.00565	Q16799;Q2NKQ5;Q16799-2	Q16799;Q2NKQ5;Q16799-2	Reticulon-1;Reticulon	RTN1
7.47606	7.44526	7.41608	NaN	NaN	NaN	NaN	NaN	NaN	NaN	NaN	NaN	+				cell differentiation;cellular developmental process;cellular process;developmental process;neuron differentiation		cell part;cytoplasmic part;endoplasmic reticulum membrane;endoplasmic reticulum part;integral to endoplasmic reticulum membrane;integral to membrane;integral to organelle membrane;intracellular organelle part;intracellular part;intrinsic to endoplasmic reticulum membrane;intrinsic to membrane;intrinsic to organelle membrane;membrane;membrane part;organelle membrane;organelle part	Reticulon		10	2	2	33.2	9.1	9.1	23.575	6.6983	3458600000	22066000	3436500000	5.25517	7.3458	0	NaN	0	NaN	0	NaN	Q16799-3;A8MT72	Q16799-3;A8MT72	Reticulon-1;Reticulon	RTN1
NaN	2.96092	2.71345	NaN	NaN	NaN	NaN	NaN	NaN	NaN	NaN	NaN							cell part;cytoplasmic part;endosome;intracellular membrane-bounded organelle;intracellular organelle;intracellular organelle part;intracellular part;membrane;membrane-bounded organelle;mitochondrial inner membrane;mitochondrial membrane;mitochondrial part;organelle;organelle inner membrane;organelle membrane;organelle part	OCIA		4	4	4	27.3	27.3	27.3	16.953	11.46	15394000	2859300	12535000	1.54123	2.73719	0	NaN	0	NaN	0	NaN	Q56VL3;D6RD77;J3KPI9;Q56VL3-2	Q56VL3	OCIA domain-containing protein 2	OCIAD2
2.11636	NaN	2.45091	NaN	NaN	NaN	NaN	NaN	NaN	NaN	NaN	NaN					response to chemical stimulus;response to inorganic substance;response to oxidative stress;response to reactive oxygen species;response to stimulus;response to stress	antioxidant activity;catalytic activity;glutathione peroxidase activity;oxidoreductase activity;oxidoreductase activity, acting on peroxide as acceptor;peroxidase activity	cell part;cytoplasmic part;endoplasmic reticulum lumen;endoplasmic reticulum part;integral to membrane;intracellular organelle lumen;intracellular organelle part;intracellular part;intrinsic to membrane;membrane part;membrane-enclosed lumen;organelle lumen;organelle part	GSHPx		3	3	3	14.8	14.8	14.8	23.881	5.4626	8889200	1892600	6996600	1.31273	2.18364	0	NaN	0	NaN	0	NaN	Q8TED1;J3KNB5;E7ETY7	Q8TED1;J3KNB5;E7ETY7	Probable glutathione peroxidase 8;Glutathione peroxidase	GPX8
7.03771	4.752	5.91449	NaN	NaN	NaN	4.18959	2.73233	2.45183	NaN	NaN	NaN					anatomical structure development;biological regulation;developmental process;establishment of localization;lipid transport;nervous system development;organic substance transport;regulation of apoptosis;regulation of biological process;regulation of cell death;regulation of cellular process;regulation of neuron apoptosis;regulation of programmed cell death;system development;transport	binding;drug binding;G-protein coupled receptor activity;molecular transducer activity;opioid receptor activity;peptide binding;peptide receptor activity;peptide receptor activity, G-protein coupled;receptor activity;signal transducer activity;signaling receptor activity;transmembrane signaling receptor activity	cell junction;cell part;cell projection part;cytoplasmic part;endoplasmic reticulum membrane;endoplasmic reticulum part;envelope;growth cone;integral to membrane;integral to plasma membrane;intracellular organelle part;intracellular part;intrinsic to membrane;intrinsic to plasma membrane;lipid particle;membrane;membrane part;nuclear envelope;nuclear inner membrane;nuclear membrane;nuclear outer m…	ERG2_Sigma1R		4	4	4	20.8	20.8	20.8	21.482	28.128	650930000	45131000	605800000	1.89649	5.8014	0	NaN	1.51884	3.02458	0	NaN	Q99720-3;Q99720;Q99720-4;Q99720-5;Q99720-2;Q5T1J1	Q99720-3;Q99720;Q99720-4;Q99720-5;Q99720-2	Sigma non-opioid intracellular receptor 1	SIGMAR1
NaN	3.60407	3.20239	NaN	NaN	NaN	NaN	NaN	NaN	4.48716	5.96007	4.67576					cellular component organization;cellular component organization or biogenesis;cellular membrane organization;cellular process;membrane organization;nuclear membrane organization		cell part;cytoplasmic part;endoplasmic reticulum lumen;endoplasmic reticulum part;Golgi apparatus;integral to membrane;integral to nuclear inner membrane;integral to organelle membrane;intracellular membrane-bounded organelle;intracellular organelle;intracellular organelle lumen;intracellular organelle part;intracellular part;intrinsic to membrane;intrinsic to nuclear inner membrane;intrinsic to …	DUF1625		14	14	14	39.5	39.5	39.5	44.875	43.221	131090000	4816200	126280000	1.41274	3.30323	0	NaN	0	NaN	2.0626	4.941	Q9BTV4;V9GY05	Q9BTV4	Transmembrane protein 43	TMEM43
6.765	6.14576	6.90002	6.67087	7.37269	7.45344	7.22081	7.3497	7.46793	6.59503	6.38229	6.81941			+	+	anatomical structure formation involved in morphogenesis;anatomical structure morphogenesis;angiogenesis;apoptosis;axonal fasciculation;biological regulation;cardiac epithelial to mesenchymal transition;cell death;cell migration;cell morphogenesis;cell morphogenesis involved in differentiation;cell motility;cell recognition;cell surface receptor linked signaling pathway;cellular component morphog…		cell body;cell part;cell projection;cytoplasmic part;endoplasmic reticulum;endoplasmic reticulum part;envelope;extracellular membrane-bounded organelle;extracellular organelle;extracellular region part;extracellular vesicular exosome;integral to endoplasmic reticulum membrane;integral to membrane;integral to organelle membrane;intracellular;intracellular membrane-bounded organelle;intracellular o…	Reticulon		27	27	10	32.2	32.2	12.1	129.93	323.31	67216000000	5096200000	62120000000	2.89537	6.50359	2.90848	7.06567	4.01338	7.24615	3.42379	6.49891	Q9NQC3;Q9NQC3-4;Q9NQC3-6	Q9NQC3;Q9NQC3-4;Q9NQC3-6	Reticulon-4	RTN4
NaN	2.91079	2.83829	NaN	2.63222	2.15895	2.1414	2.9201	2.38195	1.83661	2.04883	2.62197					biological regulation;biosynthetic process;cell death;cell projection organization;cellular biosynthetic process;cellular component organization;cellular component organization at cellular level;cellular component organization or biogenesis;cellular component organization or biogenesis at cellular level;cellular lipid metabolic process;cellular localization;cellular macromolecule localization;cel…	binding;cytoskeletal protein binding;FFAT motif binding;microtubule binding;molecular transducer activity;protein binding;protein dimerization activity;protein domain specific binding;protein heterodimerization activity;signal transducer activity;tubulin binding	cell part;cytoplasmic part;cytoskeleton;endoplasmic reticulum;endoplasmic reticulum membrane;endoplasmic reticulum part;Golgi apparatus part;Golgi membrane;integral to membrane;intracellular membrane-bounded organelle;intracellular non-membrane-bounded organelle;intracellular organelle;intracellular organelle part;intracellular part;intrinsic to membrane;membrane;membrane part;membrane-bounded or…	Motile_Sperm	Tight junction	10	10	9	39.8	39.8	39.8	27.893	35.633	90929000	12481000	78447000	2.08	2.77454	1.18447	2.29559	2.0354	2.38115	1.89935	2.06914	Q9P0L0;Q9P0L0-2;J3QKM9	Q9P0L0;Q9P0L0-2	Vesicle-associated membrane protein-associated protein A	VAPA
1.66657	1.89701	2.72452	4.88991	5.24142	4.63981	3.6368	3.43309	4.23573	2.95259	3.21459	2.42613			+				cell part;cytoplasmic part;endoplasmic reticulum membrane;endoplasmic reticulum part;extracellular membrane-bounded organelle;extracellular organelle;extracellular region part;extracellular vesicular exosome;integral to membrane;intracellular organelle part;intracellular part;intrinsic to membrane;membrane;membrane part;membrane-bounded organelle;membrane-bounded vesicle;organelle;organelle membr…	CUE		11	11	11	29.3	29.3	29.3	45.786	84.873	174010000	26021000	147990000	1.60325	1.99603	2.88407	4.82371	2.36818	3.66854	2.1574	2.76444	Q9Y679-2;Q9Y679;Q9Y679-3	Q9Y679-2;Q9Y679;Q9Y679-3	Ancient ubiquitous protein 1	AUP1
3.10237	3.03861	3.71534	NaN	NaN	NaN	3.90371	3.834	4.14094	NaN	1.8612	1.19036			+		cellular localization;cellular macromolecule localization;cellular process;cellular protein localization;localization;macromolecule localization;protein localization;protein localization in mitochondrion;protein localization to organelle		cell part;cytoplasmic part;extracellular membrane-bounded organelle;extracellular organelle;extracellular region part;extracellular vesicular exosome;integral to membrane;intracellular membrane-bounded organelle;intracellular organelle;intracellular organelle part;intracellular part;intrinsic to membrane;membrane;membrane part;membrane-bounded organelle;membrane-bounded vesicle;mitochondrial inne…	Mito_carr		8	8	2	37.6	37.6	9.2	33.331	60.13	204170000	13744000	190430000	2.34146	3.18544	0	NaN	3.23742	3.85955	0.832411	1.42578	Q9Y6C9	Q9Y6C9	Mitochondrial carrier homolog 2	MTCH2
NaN	0.153935	0.540722	NaN	NaN	NaN	NaN	NaN	0.491391	-0.00940814	NaN	0.25411					activation of immune response;activation of innate immune response;activation of MAPK activity;activation of MAPKK activity;activation of protein kinase activity;aging;anaphase-promoting complex-dependent proteasomal ubiquitin-dependent protein catabolic process;anatomical structure development;anatomical structure morphogenesis;apoptosis;axon guidance;biological regulation;biosynthetic process;c…	adenyl nucleotide binding;adenyl ribonucleotide binding;ATP binding;binding;catalytic activity;cyclin-dependent protein kinase activity;histone kinase activity;kinase activity;nucleotide binding;phosphotransferase activity, alcohol group as acceptor;protein kinase activity;protein serine/threonine kinase activity;purine nucleotide binding;purine ribonucleoside triphosphate binding;purine ribonucl…	cell part;centrosome;cytoplasm;cytoplasmic part;cytoskeletal part;cytosol;extracellular membrane-bounded organelle;extracellular organelle;extracellular region part;extracellular vesicular exosome;intracellular membrane-bounded organelle;intracellular non-membrane-bounded organelle;intracellular organelle;intracellular organelle part;intracellular part;macromolecular complex;membrane;membrane-bou…	Pkinase	Cell cycle;Gap junction;Oocyte meiosis;p53 signaling pathway;Progesterone-mediated oocyte maturation	5	5	4	18.5	18.5	15.8	34.081	10.287	58468000	23968000	34500000	0.374197	0.247328	0	NaN	0	0.391391	0.0491364	0.0223511	A0A024QZP7;P06493;E5RIU6;A0A087WZZ9;P06493-2;K7ELV5;E7ESI2;G3V5T9;P24941-2;P24941;Q00526;G3V317;F8VXD2;F8VYH9;F8VZZ0;F8VTV8;F8VWX7;F8VZ51;K7EJ83;H0YAZ9;Q9BVE2;E7EUK8;E5RGN0;A0A087X209;A0A087WZU2;J3QSD7;P11802-2;Q00535-2;Q00535;P11802;Q00534;Q96Q40-2;Q96Q40-4;Q96Q40-3;O94921-3;Q96Q40-5;Q96Q40;O94921-2;O94921;Q07002;Q07002-2;Q00536;Q00536-3;Q07002-3;Q00536-2;Q9NYV4-3;Q14004-2;Q9NYV4-2;Q9NYV4;Q14004	A0A024QZP7;P06493;E5RIU6;A0A087WZZ9;P06493-2	Cyclin-dependent kinase 1	CDC2;CDK1
NaN	-0.343238	NaN	NaN	NaN	NaN	0.700795	NaN	NaN	NaN	NaN	NaN					alcohol metabolic process;cholesterol metabolic process;establishment of localization;lipid metabolic process;lipid transport;metabolic process;organic substance transport;primary metabolic process;small molecule metabolic process;steroid metabolic process;sterol metabolic process;transport	binding;lipid binding;nucleic acid binding;RNA binding	cell part;cytoplasm;extracellular region part;high-density lipoprotein particle;intracellular membrane-bounded organelle;intracellular organelle;intracellular part;macromolecular complex;membrane;membrane-bounded organelle;nucleus;organelle;plasma lipoprotein particle;plasma membrane;protein-lipid complex	KH_1		3	3	3	3	3	3	141.44	12.669	6117200	2722600	3394500	0	-0.443238	0	NaN	0	0.600795	0	NaN	A0A024R4E5;Q00341;C9JHS9;C9J739;C9JMQ6;C9JQ82;C9JBS3;C9JEJ8;A0A0U1RVI6;C9JHN6;C9JT62;C9JHS7;C9JK79;C9JHZ8;C9JES8;C9JZI8;C9J5E5;C9JIZ1;H7C0A4;H0Y394;Q00341-2	A0A024R4E5;Q00341	Vigilin	HDLBP
-0.0760978	0.127633	-0.203917	-0.755015	-0.190371	-0.157351	0.305679	0.300885	0.146003	0.134352	0.288418	0.394624					biological regulation;biosynthetic process;catabolic process;cellular biosynthetic process;cellular catabolic process;cellular component disassembly;cellular component disassembly at cellular level;cellular component organization;cellular component organization at cellular level;cellular component organization or biogenesis;cellular component organization or biogenesis at cellular level;cellular …	binding;nucleic acid binding;RNA binding;rRNA binding;structural constituent of ribosome;structural molecule activity;translation regulator activity	adherens junction;anchoring junction;cell junction;cell part;cell-substrate adherens junction;cell-substrate junction;cytoplasm;cytoplasmic part;cytosol;cytosolic small ribosomal subunit;extracellular membrane-bounded organelle;extracellular organelle;extracellular region part;extracellular vesicular exosome;focal adhesion;intracellular membrane-bounded organelle;intracellular non-membrane-bounde…	Ribosomal_S4;S4	Ribosome	14	14	14	53.6	53.6	53.6	22.591	25.72	1094400000	555600000	538760000	0.58719	-0.150794	0.861834	-0.467579	0.988878	0.150856	0.82411	0.172465	A0A024R4M0;P46781;B5MCT8;C9JM19;F2Z3C0;A8MXK4	A0A024R4M0;P46781;B5MCT8;C9JM19	40S ribosomal protein S9	RPS9
0.0807941	NaN	NaN	NaN	NaN	NaN	NaN	NaN	NaN	NaN	NaN	NaN					macromolecule metabolic process;membrane protein proteolysis;metabolic process;primary metabolic process;protein metabolic process;proteolysis	aspartic endopeptidase activity, intramembrane cleaving;aspartic-type endopeptidase activity;aspartic-type peptidase activity;binding;catalytic activity;endopeptidase activity;enzyme binding;hydrolase activity;identical protein binding;peptidase activity;peptidase activity, acting on L-amino acid peptides;protein binding;protein dimerization activity;protein homodimerization activity;ubiquitin pr…	cell part;cell surface;cytoplasmic part;endoplasmic reticulum;endoplasmic reticulum part;integral to cytosolic side of endoplasmic reticulum membrane;integral to endoplasmic reticulum membrane;integral to lumenal side of endoplasmic reticulum membrane;integral to membrane;integral to organelle membrane;intracellular membrane-bounded organelle;intracellular organelle;intracellular organelle part;i…	Peptidase_A22B		2	2	2	7	7	7	30.162	3.3531	1537200	379800	1157400	0	-0.0192059	0	NaN	0	NaN	0	NaN	A0A075B6F6;Q8TCT9-5;Q8TCT9;Q8TCT9-4;Q8TCT9-2;A0A0C4DGU3	A0A075B6F6;Q8TCT9-5;Q8TCT9;Q8TCT9-4;Q8TCT9-2;A0A0C4DGU3	Minor histocompatibility antigen H13	HM13
NaN	NaN	NaN	NaN	NaN	NaN	NaN	NaN	NaN	NaN	NaN	NaN					actin filament-based movement;actin filament-based process;actin-mediated cell contraction;actin-myosin filament sliding;anatomical structure arrangement;anatomical structure development;anatomical structure homeostasis;biological regulation;biosynthetic process;calcium-mediated signaling;cardiac muscle contraction;cell development;cellular biosynthetic process;cellular component assembly;cellula…	actin binding;binding;cation binding;cytoskeletal protein binding;dystroglycan binding;enzyme binding;glycoprotein binding;ion binding;metal ion binding;myosin binding;nitric-oxide synthase binding;protein binding;structural constituent of cytoskeleton;structural constituent of muscle;structural molecule activity;transition metal ion binding;vinculin binding;zinc ion binding	cell junction;cell part;cell projection;cell projection membrane;cell projection part;cell surface;cell-substrate junction;contractile fiber part;costamere;cytoplasmic part;cytoskeleton;cytosol;dystrophin-associated glycoprotein complex;filopodium;filopodium membrane;intracellular membrane-bounded organelle;intracellular non-membrane-bounded organelle;intracellular organelle;intracellular part;ma…	CH;EF-hand_2;EF-hand_3;Spectrin;WW;ZZ	Arrhythmogenic right ventricular cardiomyopathy (ARVC);Dilated cardiomyopathy;Hypertrophic cardiomyopathy (HCM);Viral myocarditis	3	3	3	0.9	0.9	0.9	426.84	7.4272	170810000	167960000	2843900	0	NaN	0	NaN	0	NaN	0	NaN	A0A087WTU7;A0A075B6G3;P11532;A0A087WV90;E9PDN5;P11532-4;A0A0B4J1W6;Q14172;P11532-3;P11532-2	A0A087WTU7;A0A075B6G3;P11532;A0A087WV90;E9PDN5;P11532-4	Dystrophin	DMD
NaN	NaN	NaN	NaN	NaN	NaN	NaN	-3.44051	NaN	NaN	NaN	NaN					activation of immune response;anatomical structure homeostasis;biological regulation;cellular component organization;cellular component organization or biogenesis;cellular membrane organization;cellular process;complement activation;complement activation, classical pathway;defense response;endocytosis;establishment of localization;homeostatic process;humoral immune response;immune effector proces…	antigen binding;binding	blood microparticle;cell part;extracellular membrane-bounded organelle;extracellular organelle;extracellular region;extracellular region part;extracellular space;extracellular vesicular exosome;membrane;membrane-bounded organelle;membrane-bounded vesicle;organelle;plasma membrane;vesicle	C1-set;V-set		3	3	3	49.5	49.5	49.5	11.609	6.6231	33366000	32592000	774080	0	NaN	0	NaN	0	-3.54051	0	NaN	A0A075B6H6;A0A087WZW8;A0A087X1V9;P01834;A0A0U1RRF4;A0A087WWV8	A0A075B6H6;A0A087WZW8;A0A087X1V9;P01834	Ig kappa chain C region	IGKC;IGKV3-11
NaN	NaN	NaN	NaN	NaN	NaN	NaN	NaN	NaN	NaN	NaN	NaN					activation of immune response;biological regulation;cellular component organization;cellular component organization or biogenesis;cellular membrane organization;cellular process;complement activation;complement activation, classical pathway;defense response;endocytosis;establishment of localization;humoral immune response;immune effector process;immune response;immune system process;innate immune…	antigen binding;binding	blood microparticle;cell part;extracellular membrane-bounded organelle;extracellular organelle;extracellular region;extracellular region part;extracellular space;extracellular vesicular exosome;membrane;membrane-bounded organelle;membrane-bounded vesicle;organelle;plasma membrane;vesicle	C1-set		2	2	2	23.6	23.6	23.6	11.208	16.363	5586500	5586500	0	0	NaN	0	NaN	0	NaN	0	NaN	A0A075B6L0;A0A075B6K9;P0CG06;P0CG05;A0A075B6K8;A0A0B4J231;P0CG04;P0CF74;B9A064	A0A075B6L0;A0A075B6K9;P0CG06;P0CG05;A0A075B6K8;A0A0B4J231;P0CG04;P0CF74;B9A064	Ig lambda-3 chain C regions;Ig lambda-2 chain C regions;Ig lambda-1 chain C regions;Ig lambda-6 chain C region;Immunoglobulin lambda-like polypeptide 5	IGLC3;IGLC2;IGLC1;IGLL5;IGLC6
NaN	NaN	NaN	NaN	NaN	NaN	NaN	NaN	NaN	NaN	NaN	NaN								V-set		1	1	1	9.4	9.4	9.4	13.012	2.803	2075300	2075300	0	0	NaN	0	NaN	0	NaN	0	NaN	A0A075B7D0	A0A075B7D0		IGHV1OR15-1
NaN	NaN	NaN	NaN	NaN	NaN	NaN	NaN	NaN	NaN	NaN	NaN								V-set		1	1	1	9.2	9.2	9.2	13.08	3.6888	15125000	15125000	0	0	NaN	0	NaN	0	NaN	0	NaN	A0A075B7D8	A0A075B7D8		IGHV3OR15-7
NaN	NaN	NaN	NaN	NaN	NaN	NaN	NaN	NaN	NaN	NaN	NaN					axon guidance;biological adhesion;biological regulation;cell adhesion;cell projection organization;cell surface receptor linked signaling pathway;cell-cell adhesion;cellular component organization;cellular component organization at cellular level;cellular component organization or biogenesis;cellular component organization or biogenesis at cellular level;cellular process;cellular response to chem…	binding;identical protein binding;protein binding	anchored to membrane;axon;cell body;cell junction;cell part;cell projection;cell projection part;cell surface;cell-cell junction;cytoplasm;cytoplasmic part;external side of plasma membrane;extracellular membrane-bounded organelle;extracellular organelle;extracellular region part;extracellular vesicular exosome;Golgi apparatus part;Golgi membrane;growth cone;integral to membrane;intracellular orga…	fn3;I-set	Cell adhesion molecules (CAMs);Prion diseases	3	3	3	5	5	5	80.282	5.6019	1807600	212170	1595400	0	NaN	0	NaN	0	NaN	0	NaN	H7BYX6;A0A087WTE4;A0A087WTF6;A0A087WX77;A0A087WWD4;A0A087WV75;P13591-4;P13591-3;P13591-1;P13591;A0A087X1V2;A0A087WVU1;A0A0D9SF98;A0A087WWJ5;P13591-5;A0A087WZS4;A0A0C4DGS4;P13591-6	H7BYX6;A0A087WTE4;A0A087WTF6;A0A087WX77;A0A087WWD4;A0A087WV75;P13591-4;P13591-3;P13591-1;P13591;A0A087X1V2;A0A087WVU1;A0A0D9SF98;A0A087WWJ5;P13591-5	Neural cell adhesion molecule 1	NCAM1
NaN	1.2326	1.03675	NaN	1.17843	1.15491	0.41045	0.488515	0.390117	0.510354	0.493647	0.347439					biological regulation;biosynthetic process;catabolic process;cellular biosynthetic process;cellular catabolic process;cellular macromolecule biosynthetic process;cellular macromolecule catabolic process;cellular macromolecule metabolic process;cellular metabolic process;cellular nitrogen compound metabolic process;cellular process;establishment of localization;establishment of RNA localization;ge…	binding;DNA binding;mRNA binding;nucleic acid binding;RNA binding	cell part;cytoplasmic part;cytosol;intracellular non-membrane-bounded organelle;intracellular organelle;intracellular organelle part;intracellular part;macromolecular complex;membrane;non-membrane-bounded organelle;nuclear part;nucleoplasm;organelle;organelle part;ribonucleoprotein complex;RNA granule;stress granule	DUF1897;KH_1		11	11	11	18.6	18.6	18.6	73.027	54.566	71501000	31343000	40157000	1.22132	1.03467	2.15375	1.06667	2.08761	0.329694	1.6755	0.35048	A0A087WTP3;Q92945;M0R0I5;M0QYH3;M0QXW7;M0R3J3;M0R251;M0QYG1;M0R263;M0R0C6;E9PEB5;Q96AE4;Q96AE4-2	A0A087WTP3;Q92945;M0R0I5	Far upstream element-binding protein 2	KHSRP
NaN	NaN	NaN	NaN	NaN	NaN	NaN	NaN	NaN	NaN	NaN	NaN					biological regulation;biosynthetic process;cell cycle;cell proliferation;cellular biosynthetic process;cellular component organization;cellular component organization at cellular level;cellular component organization or biogenesis;cellular component organization or biogenesis at cellular level;cellular macromolecule biosynthetic process;cellular macromolecule metabolic process;cellular metabolic …	acid-amino acid ligase activity;binding;catalytic activity;cation binding;chromatin binding;core promoter proximal region DNA binding;core promoter proximal region sequence-specific DNA binding;DNA binding;histone binding;identical protein binding;ion binding;ligase activity;ligase activity, forming carbon-nitrogen bonds;metal ion binding;methylated histone residue binding;methyl-CpG binding;nucl…	cell part;chromatin;chromosomal part;euchromatin;heterochromatin;intracellular membrane-bounded organelle;intracellular organelle;intracellular organelle part;intracellular part;membrane-bounded organelle;nuclear chromatin;nuclear chromosome part;nuclear heterochromatin;nuclear matrix;nuclear part;nucleus;organelle;organelle part;replication fork	DUF3590;PHD;SAD_SRA;ubiquitin		2	2	2	3	3	3	91.099	2.9576	3738600	2710700	1027900	0	NaN	0	NaN	0	NaN	0	NaN	A0A087WVR3;A0A087WTW0;Q96T88;Q96T88-2;A0A087WWG9	A0A087WVR3;A0A087WTW0;Q96T88;Q96T88-2;A0A087WWG9	E3 ubiquitin-protein ligase UHRF1	UHRF1
NaN	NaN	NaN	NaN	NaN	NaN	NaN	NaN	NaN	NaN	NaN	NaN					cellular component organization;cellular component organization or biogenesis;cellular membrane organization;cellular process;endocytosis;establishment of localization;establishment of localization in cell;establishment of protein localization;exocytosis;Golgi vesicle transport;intracellular transport;membrane invagination;membrane organization;post-Golgi vesicle-mediated transport;protein transp…		cell part;clathrin coated vesicle membrane;clathrin-coated vesicle;coated vesicle;coated vesicle membrane;cytoplasmic membrane-bounded vesicle;cytoplasmic part;cytoplasmic vesicle;cytoplasmic vesicle membrane;cytoplasmic vesicle part;endosomal part;endosome membrane;Golgi apparatus part;integral to membrane;intracellular membrane-bounded organelle;intracellular organelle;intracellular organelle p…	SCAMP		2	2	2	17.5	17.5	17.5	22.911	5.2769	8920700	0	8920700	0	NaN	0	NaN	0	NaN	0	NaN	A0A087WU14;A0A087WXB0;O15126	A0A087WU14;A0A087WXB0;O15126	Secretory carrier-associated membrane protein 1	SCAMP1
NaN	NaN	NaN	NaN	NaN	NaN	NaN	NaN	NaN	NaN	NaN	NaN					biological adhesion;biological regulation;cell adhesion;cellular macromolecule metabolic process;cellular metabolic process;cellular nitrogen compound metabolic process;cellular process;macromolecule metabolic process;metabolic process;mRNA 3'-end processing;mRNA metabolic process;mRNA polyadenylation;mRNA processing;nitrogen compound metabolic process;nucleic acid metabolic process;nucleobase-co…		cell junction;cell part;cell-cell junction;cytoplasm;cytoskeleton;intracellular non-membrane-bounded organelle;intracellular organelle;intracellular organelle part;intracellular part;membrane;non-membrane-bounded organelle;nuclear part;nucleoplasm;occluding junction;organelle;organelle part;plasma membrane;tight junction	Cohesin_HEAT;Symplekin_C	mRNA surveillance pathway;Tight junction	1	1	1	13.9	13.9	13.9	12.727	2.4681	701920	417580	284340	0	NaN	0	NaN	0	NaN	0	NaN	M0R1C2;M0R180;M0QXP5;M0R3C7;A0A087WUE9;Q92797-2;Q92797	M0R1C2;M0R180;M0QXP5;M0R3C7;A0A087WUE9;Q92797-2;Q92797	Symplekin	SYMPK
NaN	NaN	NaN	NaN	NaN	NaN	NaN	NaN	NaN	NaN	NaN	NaN					activation of immune response;activation of innate immune response;anaphase-promoting complex-dependent proteasomal ubiquitin-dependent protein catabolic process;antigen processing and presentation;antigen processing and presentation of exogenous antigen;antigen processing and presentation of exogenous peptide antigen;antigen processing and presentation of exogenous peptide antigen via MHC class …	catalytic activity;endopeptidase activity;hydrolase activity;peptidase activity;peptidase activity, acting on L-amino acid peptides;threonine-type endopeptidase activity;threonine-type peptidase activity	actin cytoskeleton;cell part;cytoplasm;cytoplasmic part;cytoskeleton;cytosol;extracellular membrane-bounded organelle;extracellular organelle;extracellular region part;extracellular vesicular exosome;Golgi apparatus;intracellular membrane-bounded organelle;intracellular non-membrane-bounded organelle;intracellular organelle;intracellular organelle part;intracellular part;macromolecular complex;me…	Proteasome	Proteasome	1	1	1	16.8	16.8	16.8	12.082	2.2998	257990	112300	145690	0	NaN	0	NaN	0	NaN	0	NaN	A0A087WXQ8;A0A087WY10;A0A087WUL2;P49720	A0A087WXQ8;A0A087WY10;A0A087WUL2;P49720	Proteasome subunit beta type-3	PSMB3
NaN	0.0326651	NaN	NaN	NaN	-0.309771	0.00733906	0.332393	0.251325	0.818033	NaN	0.497434					biological regulation;biosynthetic process;catabolic process;cellular biosynthetic process;cellular catabolic process;cellular component biogenesis;cellular component biogenesis at cellular level;cellular component disassembly;cellular component disassembly at cellular level;cellular component organization;cellular component organization at cellular level;cellular component organization or biogen…	binding;nucleotide binding;protein binding;structural constituent of ribosome;structural molecule activity;translation initiation factor binding	cell part;cytoplasm;cytoplasmic part;cytosol;cytosolic small ribosomal subunit;intracellular membrane-bounded organelle;intracellular non-membrane-bounded organelle;intracellular organelle;intracellular organelle part;intracellular part;macromolecular complex;membrane;membrane-bounded organelle;non-membrane-bounded organelle;nuclear part;nucleolus;nucleus;organelle;organelle part;ribonucleoprotei…	Ribosomal_S24e	Ribosome	5	5	5	35.9	35.9	35.9	15.197	19.02	125800000	61559000	64241000	0	-0.0673349	0	-0.409771	0.371324	0.097019	0.749165	0.557733	E7ETK0;A0A087WUS0;P62847-2;P62847-3;P62847;P62847-4	E7ETK0;A0A087WUS0;P62847-2;P62847-3;P62847;P62847-4	40S ribosomal protein S24	RPS24
NaN	NaN	NaN	NaN	NaN	0.0894982	NaN	NaN	NaN	NaN	NaN	NaN					biosynthetic process;cellular biosynthetic process;cellular component disassembly;cellular component disassembly at cellular level;cellular component organization;cellular component organization at cellular level;cellular component organization or biogenesis;cellular component organization or biogenesis at cellular level;cellular macromolecular complex disassembly;cellular macromolecular complex …		cell part;cytoplasmic part;intracellular membrane-bounded organelle;intracellular non-membrane-bounded organelle;intracellular organelle;intracellular organelle part;intracellular part;macromolecular complex;membrane;membrane-bounded organelle;mitochondrial inner membrane;mitochondrial membrane;mitochondrial part;mitochondrion;non-membrane-bounded organelle;organelle;organelle inner membrane;orga…			3	3	3	16.5	16.5	16.5	20.662	4.1555	5186200	2913100	2273200	0	NaN	0	-0.0105018	0	NaN	0	NaN	A0A087WUZ8;C9JJ19;P82930	A0A087WUZ8;C9JJ19;P82930	28S ribosomal protein S34, mitochondrial	MRPS34
NaN	NaN	NaN	NaN	NaN	NaN	NaN	NaN	NaN	NaN	NaN	NaN								C1-set;V-set		4	4	1	9	9	1.9	51.153	11.936	20810000	20657000	152710	0	NaN	0	NaN	0	NaN	0	NaN	A0A087WV47;A0A087X079;S4R460;A0A0B4J2B5;A0A075B7F0;A0A0C4DH37;A0A0C4DH32;A0A0B4J1X5;A0A0B4J1V1;A0A0B4J1U9;A0A0B4J1U8;A0A087X2C0;P01781	A0A087WV47;A0A087X079		IGHG1
NaN	NaN	NaN	NaN	NaN	NaN	-0.895422	NaN	NaN	-1.14388	NaN	-1.83305					cell cycle phase;cell cycle process;cell proliferation;cellular process;meiosis	adenyl nucleotide binding;adenyl ribonucleotide binding;ATP binding;binding;nucleotide binding;protein binding;protein C-terminus binding;purine nucleotide binding;purine ribonucleoside triphosphate binding;purine ribonucleotide binding;ribonucleotide binding	cell part;chromosomal part;chromosome;chromosome, centromeric region;condensed chromosome;cytoplasm;intracellular membrane-bounded organelle;intracellular non-membrane-bounded organelle;intracellular organelle;intracellular organelle part;intracellular part;membrane;membrane-bounded organelle;non-membrane-bounded organelle;nuclear part;nucleolus;nucleus;organelle;organelle part	FHA;K167R;PP1_bind		7	7	7	4.3	4.3	4.3	358.62	10.436	6499900	4607700	1892300	0	NaN	0	NaN	0	-0.995422	0.866479	-1.58847	A0A087WV66;P46013-2;P46013	A0A087WV66;P46013-2;P46013	Antigen KI-67	MKI67
NaN	NaN	NaN	NaN	NaN	NaN	-1.08452	-0.892473	-1.12296	-1.33428	-1.1555	-1.30372			+	+	biological regulation;cellular macromolecule metabolic process;cellular metabolic process;cellular nitrogen compound metabolic process;cellular process;macromolecule metabolic process;metabolic process;ncRNA metabolic process;ncRNA processing;nitrogen compound metabolic process;nucleic acid metabolic process;nucleobase-containing compound metabolic process;positive regulation of biological proces…	binding;catalytic activity;methyltransferase activity;nucleic acid binding;RNA binding;S-adenosylmethionine-dependent methyltransferase activity;transferase activity;transferase activity, transferring one-carbon groups	cell part;intracellular non-membrane-bounded organelle;intracellular organelle;intracellular organelle part;intracellular part;non-membrane-bounded organelle;nuclear part;nucleolus;organelle;organelle part	Nol1_Nop2_Fmu;P120R		7	7	7	10.1	10.1	10.1	94.095	46.671	30112000	20538000	9574000	0	NaN	0	NaN	2.4052	-1.13332	2.78699	-1.3645	A0A087WV73;P46087-3;P46087-2;P46087;P46087-4;F5GYR3;F5H5X6	A0A087WV73;P46087-3;P46087-2;P46087;P46087-4	Probable 28S rRNA (cytosine(4447)-C(5))-methyltransferase	NOP2
NaN	NaN	NaN	NaN	NaN	NaN	NaN	NaN	NaN	NaN	NaN	NaN					biological regulation;cellular lipid metabolic process;cellular metabolic process;cellular process;cellular response to stimulus;lipid metabolic process;membrane lipid metabolic process;metabolic process;primary metabolic process;regulation of biological process;regulation of cellular process;response to stimulus;signal transduction;sphingolipid metabolic process		cell part;integral to membrane;intrinsic to membrane;membrane;membrane part	DUF2404		6	6	6	9	9	9	125.38	14.468	10392000	0	10392000	0	NaN	0	NaN	0	NaN	0	NaN	A0A087WVA8;Q8IWB9;Q8IWB9-2;J3KRZ8	A0A087WVA8;Q8IWB9;Q8IWB9-2;J3KRZ8	Testis-expressed sequence 2 protein	TEX2
NaN	NaN	NaN	NaN	NaN	NaN	NaN	NaN	NaN	NaN	NaN	-0.261656					anatomical structure development;anatomical structure formation involved in morphogenesis;anatomical structure morphogenesis;angiogenesis;apoptosis;apoptosis involved in heart morphogenesis;apoptosis involved in morphogenesis;atrial septum morphogenesis;atrioventricular valve morphogenesis;biological adhesion;biological regulation;blood vessel development;cardiac septum development;cardiac septum…	binding;carbohydrate binding;extracellular matrix binding;glycosaminoglycan binding;heparin binding;integrin binding;pattern binding;polysaccharide binding;protein binding;protein complex binding;receptor binding	extracellular matrix;extracellular region;extracellular region part;proteinaceous extracellular matrix	Cys_knot;IGFBP;TSP_1;VWC		3	3	3	9.8	9.8	9.8	41.839	6.0249	6314400	2859600	3454800	0	NaN	0	NaN	0	NaN	0	-0.361656	A0A087WVM3;O00622	A0A087WVM3;O00622	Protein CYR61	CYR61
0.58602	0.873734	0.32435	0.508023	NaN	0.293017	1.37423	0.96451	0.962512	0.548042	0.248049	0.691713					aromatic compound biosynthetic process;biosynthetic process;carboxylic acid metabolic process;cellular aromatic compound metabolic process;cellular biosynthetic process;cellular ketone metabolic process;cellular metabolic process;cellular nitrogen compound biosynthetic process;cellular nitrogen compound metabolic process;cellular process;coenzyme biosynthetic process;coenzyme metabolic process;co…	adenyl nucleotide binding;adenyl ribonucleotide binding;ATP binding;binding;catalytic activity;formate-tetrahydrofolate ligase activity;identical protein binding;ligase activity;ligase activity, forming carbon-nitrogen bonds;methylenetetrahydrofolate dehydrogenase (NADP+) activity;nucleotide binding;oxidoreductase activity;oxidoreductase activity, acting on the CH-NH group of donors;oxidoreductas…	cell part;cytoplasmic part;intracellular membrane-bounded organelle;intracellular organelle;intracellular part;membrane;membrane-bounded organelle;mitochondrion;organelle	FTHFS;THF_DHG_CYH;THF_DHG_CYH_C	One carbon pool by folate	11	11	11	13.9	13.9	13.9	99.31	19.848	20024000	8329500	11695000	1.04919	0.494701	0.660145	0.30052	1.7395	1.00042	1.02745	0.395935	A0A087WVM4;B7ZM99;Q6UB35;H0Y327;Q4VXM0;Q6UB35-2;Q4VXM1;Q4VXV2;Q5JYA8;Q5JYA3	A0A087WVM4;B7ZM99;Q6UB35	Monofunctional C1-tetrahydrofolate synthase, mitochondrial	MTHFD1L
-0.0897125	-0.136426	NaN	-0.608056	-0.590984	-0.632853	0.95784	0.88534	0.912037	1.53097	1.45859	1.46064		+	+	+	antigen processing and presentation;antigen processing and presentation of exogenous antigen;antigen processing and presentation of exogenous peptide antigen;antigen processing and presentation of exogenous peptide antigen via MHC class II;antigen processing and presentation of peptide antigen;antigen processing and presentation of peptide antigen via MHC class II;antigen processing and presentat…	binding;clathrin binding;clathrin light chain binding;double-stranded RNA binding;enzyme binding;kinase binding;nucleic acid binding;protein binding;protein kinase binding;RNA binding;structural molecule activity	adherens junction;anchoring junction;cell junction;cell part;cell-substrate adherens junction;cell-substrate junction;clathrin coat;clathrin coat of coated pit;clathrin coat of trans-Golgi network vesicle;clathrin coated vesicle membrane;clathrin complex;clathrin vesicle coat;clathrin-coated endocytic vesicle membrane;clathrin-coated vesicle;coated vesicle;coated vesicle membrane;cytoplasm;cytopl…	Clathrin;Clathrin_propel;Clathrin-link	Bacterial invasion of epithelial cells;Endocrine and other factor-regulated calcium reabsorption;Endocytosis;Huntington's disease;Lysosome	52	52	52	36.1	36.1	36.1	192.06	303.98	737670000	236870000	500800000	1.15796	-0.213069	3.53398	-0.710631	3.17494	0.818406	3.52921	1.3834	A0A087WVQ6;Q00610-2;Q00610;J3KS13;A0A087WX41;P53675-2;P53675;K7EJJ5;J3KSQ2;J3QL20;J3KRF5;F5H5N6	A0A087WVQ6;Q00610-2;Q00610	Clathrin heavy chain;Clathrin heavy chain 1	CLTC
NaN	-0.177702	NaN	-0.52585	-0.681909	NaN	0.246347	NaN	NaN	0.16092	0.453333	0.487589					biosynthetic process;cell differentiation;cellular biosynthetic process;cellular developmental process;cellular macromolecule biosynthetic process;cellular macromolecule metabolic process;cellular metabolic process;cellular process;cellular protein metabolic process;developmental process;establishment of localization;establishment of protein localization;macromolecule biosynthetic process;macromo…	receptor activity	cell part;cytoplasmic part;endoplasmic reticulum;endoplasmic reticulum part;integral to endoplasmic reticulum membrane;integral to membrane;integral to organelle membrane;intracellular membrane-bounded organelle;intracellular non-membrane-bounded organelle;intracellular organelle;intracellular organelle part;intracellular part;intrinsic to endoplasmic reticulum membrane;intrinsic to membrane;intr…	Rib_recp_KP_reg	Protein processing in endoplasmic reticulum	14	14	14	24	24	24	84.325	55.916	40162000	15589000	24573000	0	-0.277702	1.15313	-0.703879	0	0.146347	0.909364	0.267281	F8W7S5;A0A087WVV2;A0A0A0MRV0;Q9P2E9-3;Q9P2E9-2;Q9P2E9;A0A087WU26;H0YDJ4;H9KV85;E9PN67;C9J066;Q8N4C6-6;Q8N4C6-11;Q8N4C6-4;Q8N4C6-9;Q8N4C6-2;Q8N4C6;Q8N4C6-5;Q8N4C6-10;Q8N4C6-7	F8W7S5;A0A087WVV2;A0A0A0MRV0;Q9P2E9-3;Q9P2E9-2;Q9P2E9	Ribosome-binding protein 1	RRBP1
NaN	0.186374	NaN	NaN	NaN	NaN	NaN	NaN	NaN	NaN	NaN	NaN					biological regulation;cellular metabolic process;cellular nitrogen compound metabolic process;cellular process;cellular response to stimulus;metabolic process;nitrogen compound metabolic process;nucleobase-containing compound metabolic process;nucleobase-containing small molecule metabolic process;nucleoside phosphate metabolic process;nucleotide metabolic process;nucleotide phosphorylation;phosp…	catalytic activity;guanylate kinase activity;kinase activity;nucleobase-containing compound kinase activity;nucleotide kinase activity;phosphotransferase activity, phosphate group as acceptor;transferase activity;transferase activity, transferring phosphorus-containing groups	cell part;integral to membrane;integral to plasma membrane;intrinsic to membrane;intrinsic to plasma membrane;membrane;membrane part;plasma membrane part	Guanylate_kin;L27;PDZ;SH3_2		1	1	1	13.7	13.7	13.7	7.947	2.7685	13874000	5784100	8089900	0	0.0863738	0	NaN	0	NaN	0	NaN	E5RFN8;A0A087X0C7;E5RK50;E5RJK0;E5RK44;E5RI32;E5RIU3;A0A087WVY2;E5RI47;B4DZ84;D3DX48;A0A0A0MRU0;A0A0D9SFF8;D3DX49;A0A0C4DH75;Q14168-6;Q14168-2;Q14168-3;Q14168;Q14168-4	E5RFN8;A0A087X0C7;E5RK50;E5RJK0;E5RK44;E5RI32;E5RIU3;A0A087WVY2;E5RI47;B4DZ84;D3DX48;A0A0A0MRU0;A0A0D9SFF8;D3DX49;A0A0C4DH75;Q14168-6;Q14168-2;Q14168-3;Q14168;Q14168-4	MAGUK p55 subfamily member 2	MPP2
NaN	-0.0340422	NaN	NaN	NaN	NaN	-1.07145	-0.996311	-0.926481	-1.38368	NaN	NaN			+		biological regulation;biosynthetic process;cellular biosynthetic process;cellular macromolecule biosynthetic process;cellular macromolecule metabolic process;cellular metabolic process;cellular nitrogen compound metabolic process;cellular process;cellular response to stimulus;cellular response to stress;defense response;developmental process;DNA metabolic process;DNA repair;gene expression;immune…	binding;catalytic activity;DNA binding;DNA-directed RNA polymerase activity;nucleic acid binding;nucleotidyltransferase activity;RNA polymerase activity;transferase activity;transferase activity, transferring phosphorus-containing groups	cell part;cytoplasmic part;cytosol;DNA-directed RNA polymerase complex;DNA-directed RNA polymerase I complex;DNA-directed RNA polymerase II, core complex;DNA-directed RNA polymerase III complex;intracellular membrane-bounded organelle;intracellular organelle;intracellular organelle part;intracellular part;macromolecular complex;membrane-bounded organelle;nuclear DNA-directed RNA polymerase comple…	RNA_pol_Rpb5_C;RNA_pol_Rpb5_N	Cytosolic DNA-sensing pathway;Huntington's disease;Purine metabolism;Pyrimidine metabolism;RNA polymerase	5	5	5	31	31	31	21.459	96.11	39290000	26561000	12730000	0	-0.134042	0	NaN	2.83864	-1.09808	0	-1.48368	A0A087WVZ9;A0A0A0MQR7;P19388;A0A087WWX0;A0A087WVN5	A0A087WVZ9;A0A0A0MQR7;P19388;A0A087WWX0	DNA-directed RNA polymerases I, II, and III subunit RPABC1	POLR2E
NaN	NaN	NaN	NaN	NaN	NaN	NaN	1.54799	NaN	NaN	NaN	NaN					activation of immune response;activation of innate immune response;anaphase-promoting complex-dependent proteasomal ubiquitin-dependent protein catabolic process;antigen processing and presentation;antigen processing and presentation of exogenous antigen;antigen processing and presentation of exogenous peptide antigen;antigen processing and presentation of exogenous peptide antigen via MHC class …	enzyme regulator activity	cell part;cytoplasmic part;cytosol;extracellular membrane-bounded organelle;extracellular organelle;extracellular region part;extracellular vesicular exosome;intracellular organelle part;intracellular part;macromolecular complex;membrane;membrane-bounded organelle;membrane-bounded vesicle;nuclear part;nucleoplasm;organelle;organelle part;proteasome accessory complex;proteasome complex;proteasome …	PC_rep	Proteasome	6	6	6	7.1	7.1	7.1	105.85	11.326	4827800	1150200	3677600	0	NaN	0	NaN	0	1.44799	0	NaN	A0A087WW66;Q99460-2;Q99460;H7C378;H7BZR6;C9J9M4	A0A087WW66;Q99460-2;Q99460	26S proteasome non-ATPase regulatory subunit 1	PSMD1
NaN	-0.159106	NaN	NaN	NaN	NaN	NaN	NaN	NaN	NaN	NaN	NaN					anatomical structure homeostasis;biological regulation;cell cycle process;cellular component organization;cellular component organization at cellular level;cellular component organization or biogenesis;cellular component organization or biogenesis at cellular level;cellular homeostasis;cellular process;cognition;cytokinetic cell separation;cytokinetic process;endosome organization;endosome transp…	binding;protein binding;protein domain specific binding	cell part;cytoplasm;cytoplasmic part;cytosol;endosomal part;endosome membrane;ESCRT III complex;extracellular membrane-bounded organelle;extracellular organelle;extracellular region part;extracellular vesicular exosome;intracellular;intracellular membrane-bounded organelle;intracellular organelle;intracellular organelle part;intracellular part;late endosome membrane;macromolecular complex;membran…	Snf7	Endocytosis	1	1	1	5.6	5.6	5.6	20.431	2.6782	3314400	1741400	1573000	0	-0.259106	0	NaN	0	NaN	0	NaN	A0A087WW88;C9J0A7;Q9UQN3-2;Q9UQN3	A0A087WW88;C9J0A7;Q9UQN3-2;Q9UQN3	Charged multivesicular body protein 2b	CHMP2B
NaN	NaN	NaN	NaN	NaN	NaN	NaN	NaN	-1.31473	NaN	NaN	NaN					apoptosis;biological regulation;biosynthetic process;cell death;cellular biosynthetic process;cellular macromolecule biosynthetic process;cellular macromolecule metabolic process;cellular metabolic process;cellular nitrogen compound metabolic process;cellular process;cellular response to stimulus;cellular response to stress;death;DNA metabolic process;establishment of localization;establishment o…	binding;DNA binding;nucleic acid binding;RNA binding	cell part;cytoplasm;extracellular region part;intercellular bridge;intracellular membrane-bounded organelle;intracellular organelle;intracellular organelle part;intracellular part;macromolecular complex;membrane-bounded organelle;nuclear body;nuclear matrix;nuclear part;nuclear speck;nucleoplasm;nucleoplasm part;nucleus;organelle;organelle part;protein complex;THO complex;THO complex part of tran…	Death;efThoc1	RNA transport;Spliceosome	6	6	6	12	12	12	75.651	28.836	7296800	5439600	1857300	0	NaN	0	NaN	0	-1.41473	0	NaN	A0A087WWS1;Q96FV9;R4GMN4;A0A087WY84;Q96FV9-2;J3KT14	A0A087WWS1;Q96FV9;R4GMN4	THO complex subunit 1	THOC1
-0.503998	-0.377782	-0.506435	-0.793932	-0.855353	NaN	0.460061	0.908582	0.755144	-0.406656	-0.369557	-0.175338					establishment of localization;establishment of protein localization;establishment of protein localization to organelle;macromolecule metabolic process;metabolic process;primary metabolic process;protein maturation;protein metabolic process	binding;enzyme binding;protein binding	cell part;integral to membrane;intrinsic to membrane;membrane part	Tetraspannin		1	1	1	2.3	2.3	2.3	36.644	2.4297	603320000	328480000	274840000	2.24786	-0.562738	1.67497	-0.924643	1.35841	0.607929	1.54805	-0.417184	A0A087X235;A0A087WWT4;Q9H1Z9	A0A087X235;A0A087WWT4;Q9H1Z9	Tetraspanin;Tetraspanin-10	TSPAN10
NaN	NaN	-0.165596	NaN	NaN	NaN	NaN	NaN	NaN	NaN	NaN	NaN					carbohydrate metabolic process;catabolic process;cellular catabolic process;cellular lipid catabolic process;cellular lipid metabolic process;cellular metabolic process;cellular process;ceramide catabolic process;ceramide metabolic process;galactolipid catabolic process;galactolipid metabolic process;galactosylceramide catabolic process;galactosylceramide metabolic process;glycolipid catabolic pr…	catalytic activity;ceramidase activity;galactosylceramidase activity;hydrolase activity;hydrolase activity, acting on carbon-nitrogen (but not peptide) bonds;hydrolase activity, acting on carbon-nitrogen (but not peptide) bonds, in linear amides;hydrolase activity, acting on glycosyl bonds;hydrolase activity, hydrolyzing O-glycosyl compounds	cell part;cytoplasmic part;extracellular membrane-bounded organelle;extracellular organelle;extracellular region part;extracellular vesicular exosome;intracellular membrane-bounded organelle;intracellular organelle;intracellular organelle lumen;intracellular organelle part;intracellular part;lysosomal lumen;lysosome;lytic vacuole;membrane-bounded organelle;membrane-bounded vesicle;membrane-enclos…	Glyco_hydro_59	Lysosome;Sphingolipid metabolism	2	2	2	23.2	23.2	23.2	11.695	3.8558	4870400	2913700	1956700	0	-0.265596	0	NaN	0	NaN	0	NaN	G3V4M2;G3V5E8;A0A087WX10;A0A0A0MQV0;P54803;A0A0A0MS42;P54803-5;P54803-4	G3V4M2;G3V5E8;A0A087WX10;A0A0A0MQV0;P54803;A0A0A0MS42;P54803-5;P54803-4	Galactocerebrosidase	GALC
NaN	NaN	NaN	NaN	NaN	NaN	NaN	NaN	NaN	NaN	NaN	NaN					biological regulation;biosynthetic process;cellular biosynthetic process;cellular component assembly;cellular component assembly at cellular level;cellular component organization;cellular component organization at cellular level;cellular component organization or biogenesis;cellular component organization or biogenesis at cellular level;cellular macromolecular complex assembly;cellular macromolec…	binding;endopeptidase activator activity;endopeptidase regulator activity;enzyme activator activity;enzyme binding;enzyme regulator activity;peptidase activator activity;peptidase regulator activity;protease binding;proteasome binding;protein binding;protein complex binding	cell part;cytoplasm;integral to membrane;integral to plasma membrane;intracellular membrane-bounded organelle;intracellular organelle;intracellular organelle part;intracellular part;intrinsic to membrane;intrinsic to plasma membrane;macromolecular complex;membrane;membrane part;membrane-bounded organelle;nuclear part;nucleoplasm;nucleus;organelle;organelle part;plasma membrane;plasma membrane par…	Proteasom_Rpn13		2	2	2	8.7	8.7	8.7	37.504	3.5332	2828200	1105500	1722800	0	NaN	0	NaN	0	NaN	0	NaN	A0A087WX59;Q16186;A0A087WUX6	A0A087WX59;Q16186;A0A087WUX6	Proteasomal ubiquitin receptor ADRM1	ADRM1
NaN	NaN	NaN	NaN	NaN	NaN	NaN	NaN	NaN	NaN	NaN	NaN					biological regulation;biosynthetic process;cellular biosynthetic process;cellular macromolecule biosynthetic process;cellular macromolecule metabolic process;cellular metabolic process;cellular nitrogen compound metabolic process;cellular process;macromolecule biosynthetic process;macromolecule metabolic process;metabolic process;nitrogen compound metabolic process;nucleic acid metabolic process;…		cell part;extracellular region part;extracellular space;intracellular non-membrane-bounded organelle;intracellular organelle;intracellular organelle part;intracellular part;non-membrane-bounded organelle;nuclear part;nucleolus;nucleoplasm;organelle;organelle part	NUC153		1	1	1	3.5	3.5	3.5	52.371	2.8367	591320	429920	161400	0	NaN	0	NaN	0	NaN	0	NaN	A0A087WX71;Q9H501	A0A087WX71;Q9H501	ESF1 homolog	ESF1
NaN	NaN	1.11623	NaN	NaN	1.3593	NaN	NaN	NaN	NaN	NaN	NaN					cellular metabolic process;cellular process;electron transport chain;generation of precursor metabolites and energy;metabolic process;mitochondrial electron transport, NADH to ubiquinone;oxidation-reduction process;respiratory electron transport chain;response to chemical stimulus;response to drug;response to stimulus;small molecule metabolic process	adenyl nucleotide binding;adenyl ribonucleotide binding;ATP binding;binding;catalytic activity;kinase activity;NADH dehydrogenase (quinone) activity;NADH dehydrogenase (ubiquinone) activity;NADH dehydrogenase activity;nucleobase-containing compound kinase activity;nucleoside kinase activity;nucleotide binding;oxidoreductase activity;oxidoreductase activity, acting on NADH or NADPH;oxidoreductase …	cell part;cytoplasmic part;intracellular organelle lumen;intracellular organelle part;intracellular part;macromolecular complex;membrane;membrane part;membrane-enclosed lumen;mitochondrial inner membrane;mitochondrial matrix;mitochondrial membrane;mitochondrial membrane part;mitochondrial part;mitochondrial respiratory chain complex I;NADH dehydrogenase complex;organelle inner membrane;organelle …	dNK	Alzheimer's disease;Huntington's disease;Oxidative phosphorylation;Parkinson's disease	3	3	3	7.6	7.6	7.6	40.836	3.9585	12509000	3432000	9076800	0	1.01623	0	1.2593	0	NaN	0	NaN	A0A087WXC5;E7ESZ7;O95299;O95299-2;H7C2W5;H7C1Y7;H7C2X4;Q8N1B9;C9J6X0	A0A087WXC5;E7ESZ7;O95299;O95299-2;H7C2W5;H7C1Y7;H7C2X4	NADH dehydrogenase [ubiquinone] 1 alpha subcomplex subunit 10, mitochondrial	NDUFA10
NaN	NaN	NaN	NaN	NaN	NaN	NaN	NaN	NaN	NaN	NaN	NaN					biological regulation;positive regulation of defense response to virus by host;regulation of biological process;regulation of defense response;regulation of defense response to virus;regulation of defense response to virus by host;regulation of immune effector process;regulation of immune system process;regulation of multi-organism process;regulation of response to biotic stimulus;regulation of r…	binding;cation binding;ion binding;metal ion binding;nucleic acid binding;transition metal ion binding;zinc ion binding	cell part;cytoskeleton;cytosolic large ribosomal subunit;intermediate filament cytoskeleton;intracellular membrane-bounded organelle;intracellular non-membrane-bounded organelle;intracellular organelle;intracellular organelle part;intracellular part;large ribosomal subunit;macromolecular complex;membrane-bounded organelle;non-membrane-bounded organelle;nuclear part;nucleolus;nucleus;organelle;org…	S1		1	1	1	9.6	9.6	9.6	16.523	3.3563	344610	170090	174520	0	NaN	0	NaN	0	NaN	0	NaN	A0A087WXU5;A0A087WYV3;E7EPF0;A0A0D9SEW3;A0A087WXF8;Q9NP64-2;Q9NP64-3;Q9NP64	A0A087WXU5;A0A087WYV3;E7EPF0;A0A0D9SEW3;A0A087WXF8;Q9NP64-2;Q9NP64-3;Q9NP64	Nucleolar protein of 40 kDa	ZCCHC17
-0.318434	-0.0412984	0.0745054	0.0781998	-0.271078	NaN	NaN	-0.00337989	NaN	NaN	NaN	NaN					biosynthetic process;catabolic process;cellular biosynthetic process;cellular catabolic process;cellular component disassembly;cellular component disassembly at cellular level;cellular component organization;cellular component organization at cellular level;cellular component organization or biogenesis;cellular component organization or biogenesis at cellular level;cellular macromolecular complex…	structural constituent of ribosome;structural molecule activity	cell part;cytoplasmic part;cytosol;cytosolic large ribosomal subunit;intracellular membrane-bounded organelle;intracellular organelle;intracellular organelle part;intracellular part;large ribosomal subunit;macromolecular complex;membrane-bounded organelle;nucleus;organelle;organelle part;ribonucleoprotein complex	Ribosomal_L22	Ribosome	5	5	5	33.7	33.7	33.7	19.586	20.284	132120000	67012000	65104000	0.626676	-0.195076	0.334754	-0.196439	0	-0.10338	0	NaN	A0A087WXM6;J3QQT2;J3KRX5;A0A0A6YYL6;P18621;P18621-3;J3KRB3;A0A087WWH0;J3QS96;J3QLC8;A0A0A0MRF8;P18621-2;A0A087WY81;J3KSJ0	A0A087WXM6;J3QQT2;J3KRX5;A0A0A6YYL6;P18621;P18621-3;J3KRB3;A0A087WWH0;J3QS96;J3QLC8;A0A0A0MRF8;P18621-2	60S ribosomal protein L17	RPL17;RPL17-C18orf32
NaN	NaN	NaN	NaN	NaN	NaN	NaN	NaN	NaN	NaN	NaN	NaN					biological adhesion;biological regulation;cell adhesion;cell-matrix adhesion;cell-substrate adhesion;cellular process;cellular response to stimulus;regulation of biological process;regulation of cellular process;response to stimulus;signal transduction	binding;extracellular matrix binding;laminin binding;laminin receptor activity;molecular transducer activity;protein binding;protein C-terminus binding;receptor activity;signal transducer activity;signaling receptor activity;transmembrane signaling receptor activity	cell part;external side of plasma membrane;extracellular membrane-bounded organelle;extracellular organelle;extracellular region part;extracellular vesicular exosome;integral to membrane;integral to plasma membrane;intrinsic to membrane;intrinsic to plasma membrane;membrane;membrane part;membrane-bounded organelle;membrane-bounded vesicle;organelle;plasma membrane;plasma membrane part;vesicle	C2-set_2;I-set		2	2	2	4.3	4.3	4.3	63.693	3.0379	1163300	135100	1028200	0	NaN	0	NaN	0	NaN	0	NaN	A0A087WXM8;P50895;K7ENU8	A0A087WXM8;P50895;K7ENU8	Basal cell adhesion molecule	BCAM
NaN	NaN	NaN	NaN	0.462471	NaN	NaN	NaN	NaN	NaN	NaN	NaN					cellular component organization;cellular component organization or biogenesis;cellular membrane organization;cellular process;endocytosis;establishment of localization;lipid transport;membrane invagination;membrane organization;organic substance transport;transport;vesicle-mediated transport	alcohol binding;amine binding;binding;calcium ion binding;calcium-dependent phospholipid binding;cation binding;identical protein binding;ion binding;lipid binding;metal ion binding;phosphatidylcholine binding;phosphatidylethanolamine binding;phosphatidylinositol binding;phospholipid binding;protein binding;quaternary ammonium group binding	cell part;cytoplasmic part;endoplasmic reticulum part;extrinsic to internal side of plasma membrane;extrinsic to membrane;extrinsic to plasma membrane;integral to membrane;integral to plasma membrane;intracellular organelle part;intracellular part;intrinsic to endoplasmic reticulum membrane;intrinsic to membrane;intrinsic to organelle membrane;intrinsic to plasma membrane;membrane;membrane part;o…	C2		2	2	2	2.1	2.1	2.1	98.008	2.5886	4146500	692410	3454100	0	NaN	0	0.362471	0	NaN	0	NaN	H7BXI1;A0A087WXU3;A0FGR8-2;A0FGR8;A0FGR8-6;A0FGR8-4	H7BXI1;A0A087WXU3;A0FGR8-2;A0FGR8;A0FGR8-6;A0FGR8-4	Extended synaptotagmin-2	ESYT2
NaN	0.0446039	NaN	NaN	-0.187099	0.234133	NaN	NaN	NaN	NaN	0.640806	0.811471					biological regulation;cellular macromolecule metabolic process;cellular metabolic process;cellular nitrogen compound metabolic process;cellular process;humoral immune response;immune response;immune system process;macromolecule metabolic process;metabolic process;mRNA metabolic process;nitrogen compound metabolic process;nucleic acid metabolic process;nucleobase-containing compound metabolic proc…		cell part;cytoplasmic mRNA processing body;cytoplasmic part;intracellular non-membrane-bounded organelle;intracellular organelle;intracellular part;macromolecular complex;non-membrane-bounded organelle;organelle;ribonucleoprotein complex;RNA granule	YTH		4	4	2	7.6	7.6	4.4	61.163	6.2498	23061000	10591000	12470000	0	-0.0553961	0.108883	-0.076483	0	NaN	1.06434	0.626139	A0A087WXZ3;Q9Y5A9-2;Q9Y5A9;S4R3V3	A0A087WXZ3;Q9Y5A9-2;Q9Y5A9	YTH domain-containing family protein 2	YTHDF2
NaN	NaN	NaN	NaN	NaN	NaN	NaN	1.8528	NaN	2.35592	1.89786	2.02251				+	actin filament-based movement;actin filament-based process;anatomical structure morphogenesis;axon ensheathment;biological regulation;biosynthetic process;carboxylic acid biosynthetic process;carboxylic acid metabolic process;cell communication;cell differentiation;cell-cell signaling;cellular biosynthetic process;cellular component movement;cellular component organization;cellular component orga…	adenyl nucleotide binding;adenyl ribonucleotide binding;ATP binding;binding;calcium ion binding;catalytic activity;cation binding;enzyme binding;GTPase binding;hydrolase activity;hydrolase activity, acting on acid anhydrides;hydrolase activity, acting on acid anhydrides, in phosphorus-containing anhydrides;ion binding;metal ion binding;microfilament motor activity;motor activity;nucleoside-tripho…	actomyosin;cell body;cell part;cell projection;cell projection part;cilium;cytoplasm;cytoplasmic membrane-bounded vesicle;cytoplasmic part;cytoplasmic vesicle;cytoskeletal part;cytosol;extracellular membrane-bounded organelle;extracellular organelle;extracellular region part;extracellular vesicular exosome;filopodium tip;Golgi apparatus;growth cone;insulin-responsive compartment;intermediate fila…	DIL;IQ;Myosin_head		16	16	13	11.1	11.1	9.2	212.2	57.9	23405000	3254000	20151000	0	NaN	0	NaN	0	1.7528	2.32994	1.9921	A0A087WY00;G3V394;F8WE88;F8W6H6;Q9Y4I1-2;Q9Y4I1;Q9Y4I1-3;E7ERV5;Q9UES5;O95317;Q9NQX4;H0YM93;H0YMK3;Q9NQX4-2	A0A087WY00;G3V394;F8WE88;F8W6H6;Q9Y4I1-2;Q9Y4I1;Q9Y4I1-3	Unconventional myosin-Va	MYO5A
NaN	NaN	NaN	NaN	NaN	NaN	NaN	NaN	NaN	NaN	NaN	NaN					cellular component organization;cellular component organization or biogenesis;cellular process;endosome transport;establishment of localization;establishment of localization in cell;establishment of protein localization;intracellular transport;membrane organization;multivesicular body sorting pathway;non-lytic viral release;non-lytic virus budding;protein transport;release of virus from host;repr…	binding;protein binding;protein C-terminus binding	cell part;cytoplasmic part;cytosol;endosomal part;endosome membrane;extracellular membrane-bounded organelle;extracellular organelle;extracellular region part;extracellular vesicular exosome;intracellular organelle part;intracellular part;membrane;membrane-bounded organelle;membrane-bounded vesicle;organelle;organelle membrane;organelle part;vesicle		Endocytosis	1	1	1	5	5	5	31.102	3.1156	727150	178660	548490	0	NaN	0	NaN	0	NaN	0	NaN	A0A087WY55;Q9NP79	A0A087WY55;Q9NP79	Vacuolar protein sorting-associated protein VTA1 homolog	VTA1
NaN	-0.0789293	NaN	NaN	NaN	NaN	NaN	NaN	NaN	NaN	NaN	-0.689171					antigen processing and presentation;antigen processing and presentation of exogenous antigen;antigen processing and presentation of exogenous peptide antigen;antigen processing and presentation of exogenous peptide antigen via MHC class II;antigen processing and presentation of peptide antigen;antigen processing and presentation of peptide antigen via MHC class II;antigen processing and presentat…	binding;lipid binding;lipoprotein particle receptor binding;low-density lipoprotein particle receptor binding;peptide binding;protein binding;receptor binding;signal sequence binding;transporter activity	AP-2 adaptor complex;AP-type membrane coat adaptor complex;cell part;clathrin adaptor complex;clathrin coated vesicle membrane;clathrin-coated endocytic vesicle membrane;coated vesicle membrane;cytoplasmic part;cytoplasmic vesicle membrane;cytoplasmic vesicle part;cytosol;endocytic vesicle membrane;extracellular membrane-bounded organelle;extracellular organelle;extracellular region part;extracel…	Adap_comp_sub;Clat_adaptor_s	Endocrine and other factor-regulated calcium reabsorption;Endocytosis;Huntington's disease	7	7	7	16.6	16.6	16.6	49.526	12	14380000	7717500	6662800	0	-0.178929	0	NaN	0	NaN	0	-0.789171	A0A087WY71;E9PFW3;Q96CW1-2;Q96CW1;C9JTK4;C9JGT8;C9JJ47;C9JJD3;H7C4C3;C9JPV8	A0A087WY71;E9PFW3;Q96CW1-2;Q96CW1	AP-2 complex subunit mu	AP2M1
NaN	NaN	NaN	NaN	NaN	NaN	NaN	NaN	NaN	NaN	NaN	NaN					activation of immune response;activation of innate immune response;apoptosis;biological regulation;biosynthetic process;BMP signaling pathway;catabolic process;cell death;cell surface receptor linked signaling pathway;cellular biosynthetic process;cellular catabolic process;cellular macromolecule biosynthetic process;cellular macromolecule catabolic process;cellular macromolecule metabolic proces…	acid-amino acid ligase activity;adenyl nucleotide binding;adenyl ribonucleotide binding;ATP binding;binding;catalytic activity;ligase activity;ligase activity, forming carbon-nitrogen bonds;nucleotide binding;purine nucleotide binding;purine ribonucleoside triphosphate binding;purine ribonucleotide binding;ribonucleotide binding;small conjugating protein ligase activity;ubiquitin-protein ligase a…	cell part;cytoplasmic part;cytosol;endosomal part;endosome membrane;extracellular membrane-bounded organelle;extracellular organelle;extracellular region part;extracellular vesicular exosome;intracellular organelle part;intracellular part;macromolecular complex;membrane;membrane-bounded organelle;membrane-bounded vesicle;nuclear part;nucleoplasm;organelle;organelle membrane;organelle part;plasma …	UQ_con	Protein processing in endoplasmic reticulum;Ubiquitin mediated proteolysis	1	1	1	15.3	15.3	15.3	8.2133	2.4497	7901800	4045700	3856100	0	NaN	0	NaN	0	NaN	0	NaN	D6RAW0;D6RFM0;D6RAH7;H9KV45;A0A0A0MQU3;A0A087WY85;P62837-2;P62837;P61077;P61077-2;P61077-3	D6RAW0;D6RFM0;D6RAH7;H9KV45;A0A0A0MQU3;A0A087WY85;P62837-2;P62837;P61077;P61077-2;P61077-3	Ubiquitin-conjugating enzyme E2 D2;Ubiquitin-conjugating enzyme E2 D3	UBE2D3;UBE2D2
NaN	NaN	NaN	NaN	NaN	NaN	NaN	NaN	NaN	NaN	0.947554	NaN					cellular macromolecule metabolic process;cellular metabolic process;cellular nitrogen compound metabolic process;cellular process;macromolecule metabolic process;metabolic process;nitrogen compound metabolic process;nucleic acid metabolic process;nucleobase-containing compound metabolic process;primary metabolic process;RNA metabolic process;RNA processing	adenyl nucleotide binding;adenyl ribonucleotide binding;ATP binding;ATPase activity;ATPase activity, coupled;ATP-dependent helicase activity;ATP-dependent RNA helicase activity;binding;catalytic activity;helicase activity;hydrolase activity;hydrolase activity, acting on acid anhydrides;hydrolase activity, acting on acid anhydrides, in phosphorus-containing anhydrides;nucleic acid binding;nucleosi…	cell part;cytoplasmic part;eukaryotic 43S preinitiation complex;intracellular membrane-bounded organelle;intracellular organelle;intracellular part;macromolecular complex;membrane-bounded organelle;mitochondrion;nucleus;organelle;ribonucleoprotein complex;translation preinitiation complex	DEAD;HA2;Helicase_C;OB_NTP_bind		4	4	4	3	3	3	155.29	6.4401	8453500	3368200	5085300	0	NaN	0	NaN	0	NaN	0	0.847554	A0A087WYN9;Q7Z478	A0A087WYN9;Q7Z478	ATP-dependent RNA helicase DHX29	DHX29
NaN	-0.142847	NaN	NaN	NaN	NaN	NaN	NaN	NaN	NaN	NaN	NaN					anatomical structure development;anatomical structure homeostasis;arachidonic acid metabolic process;biological regulation;biosynthetic process;carbohydrate biosynthetic process;carbohydrate metabolic process;carboxylic acid biosynthetic process;carboxylic acid metabolic process;cell proliferation;cellular biosynthetic process;cellular carbohydrate biosynthetic process;cellular carbohydrate metab…	binding;catalytic activity;DNA polymerase activity;intramolecular oxidoreductase activity;isomerase activity;nucleotidyltransferase activity;prostaglandin-E synthase activity;protein binding;RNA-directed DNA polymerase activity;telomerase activity;transferase activity;transferase activity, transferring phosphorus-containing groups;unfolded protein binding	cell part;chromosomal part;chromosome, telomeric region;cytoplasm;cytoplasmic part;cytosol;extracellular membrane-bounded organelle;extracellular organelle;extracellular region part;extracellular vesicular exosome;intracellular membrane-bounded organelle;intracellular organelle;intracellular organelle part;intracellular part;macromolecular complex;membrane-bounded organelle;membrane-bounded vesic…	CS		2	2	2	12.8	12.8	12.8	19.155	3.2655	12496000	4772200	7724100	0	-0.242847	0	NaN	0	NaN	0	NaN	A0A087WYT3;Q15185-2;Q15185-3;Q15185-4;Q15185;B4DDC6	A0A087WYT3;Q15185-2;Q15185-3;Q15185-4;Q15185;B4DDC6	Prostaglandin E synthase 3	PTGES3
NaN	NaN	NaN	NaN	NaN	NaN	NaN	NaN	NaN	NaN	NaN	NaN					apoptosis;biological adhesion;biological regulation;cell adhesion;cell death;cell-cell adhesion;cellular component assembly;cellular component assembly at cellular level;cellular component disassembly;cellular component disassembly at cellular level;cellular component disassembly involved in apoptosis;cellular component organization;cellular component organization at cellular level;cellular compo…	binding;intermediate filament binding;lamin binding;molecular transducer activity;protein binding;protein complex binding;signal transducer activity;structural constituent of epidermis;structural molecule activity	anchoring junction;cell junction;cell part;cell-cell junction;cytoskeletal part;desmosome;extracellular membrane-bounded organelle;extracellular organelle;extracellular region part;extracellular vesicular exosome;intermediate filament;intracellular membrane-bounded organelle;intracellular organelle;intracellular organelle part;intracellular part;macromolecular complex;membrane;membrane-bounded or…	Arm		3	3	3	5.1	5.1	5.1	80.532	38.358	5026400	5026400	0	0	NaN	0	NaN	0	NaN	0	NaN	A0A087WYY6;Q13835-2;Q13835	A0A087WYY6;Q13835-2;Q13835	Plakophilin-1	PKP1
NaN	NaN	NaN	NaN	NaN	NaN	NaN	NaN	NaN	NaN	NaN	NaN					biological regulation;biosynthetic process;cell cycle process;cell division;cellular biosynthetic process;cellular component assembly;cellular component assembly at cellular level;cellular component organization;cellular component organization at cellular level;cellular component organization or biogenesis;cellular component organization or biogenesis at cellular level;cellular macromolecule bios…	binding;DNA binding;nucleic acid binding	cell part;central element;chromosomal part;germ cell nucleus;intracellular membrane-bounded organelle;intracellular organelle;intracellular organelle part;intracellular part;male germ cell nucleus;membrane-bounded organelle;nuclear chromosome part;nuclear part;nucleus;organelle;organelle part;synaptonemal complex;transverse filament	SCP-1		2	2	2	2.7	2.7	2.7	93.115	2.4701	12446000	12054000	392490	0	NaN	0	NaN	0	NaN	0	NaN	Q5VXJ5;A0A087WZC3;Q15431	Q5VXJ5;A0A087WZC3;Q15431	Synaptonemal complex protein 1	SYCP1
NaN	NaN	NaN	NaN	NaN	NaN	NaN	-1.81391	NaN	NaN	-1.72261	NaN					cellular macromolecule metabolic process;cellular metabolic process;cellular nitrogen compound metabolic process;cellular process;macromolecule metabolic process;maturation of SSU-rRNA;maturation of SSU-rRNA from tricistronic rRNA transcript (SSU-rRNA, 5.8S rRNA, LSU-rRNA);metabolic process;ncRNA metabolic process;ncRNA processing;nitrogen compound metabolic process;nucleic acid metabolic process…	binding;nucleic acid binding;RNA binding	cell part;cytoplasm;extracellular region part;intercellular bridge;intracellular membrane-bounded organelle;intracellular non-membrane-bounded organelle;intracellular organelle;intracellular organelle part;intracellular part;macromolecular complex;membrane;membrane-bounded organelle;non-membrane-bounded organelle;nuclear part;nucleolus;nucleus;organelle;organelle part;preribosome;ribonucleoprotei…	KH_1		4	4	4	15.6	15.6	15.6	33.282	13.685	18794000	15544000	3249300	0	NaN	0	NaN	0	-1.91391	0	-1.82261	A0A087WZC7;Q13601-2;Q13601	A0A087WZC7;Q13601-2;Q13601	KRR1 small subunit processome component homolog	KRR1
NaN	NaN	NaN	NaN	0.29443	NaN	NaN	NaN	NaN	NaN	NaN	NaN					2-oxoglutarate metabolic process;acetyl-CoA catabolic process;acetyl-CoA metabolic process;carboxylic acid metabolic process;catabolic process;cellular catabolic process;cellular ketone metabolic process;cellular metabolic process;cellular nitrogen compound metabolic process;cellular process;coenzyme catabolic process;coenzyme metabolic process;cofactor catabolic process;cofactor metabolic proces…	binding;catalytic activity;cation binding;coenzyme binding;cofactor binding;electron carrier activity;ion binding;isocitrate dehydrogenase (NAD+) activity;isocitrate dehydrogenase activity;magnesium ion binding;metal ion binding;NAD binding;nucleotide binding;oxidoreductase activity;oxidoreductase activity, acting on CH-OH group of donors;oxidoreductase activity, acting on the CH-OH group of dono…	cell part;cytoplasmic part;intracellular membrane-bounded organelle;intracellular organelle;intracellular organelle lumen;intracellular organelle part;intracellular part;membrane-bounded organelle;membrane-enclosed lumen;mitochondrial matrix;mitochondrial part;mitochondrion;nucleus;organelle;organelle lumen;organelle part	Iso_dh	Citrate cycle (TCA cycle)	2	2	2	7.5	7.5	7.5	42.41	2.6129	4742100	1930800	2811300	0	NaN	0	0.19443	0	NaN	0	NaN	A0A087WZN1;O43837;A0A0D9SG66;A0A087X2E5;O43837-3;O43837-2	A0A087WZN1;O43837;A0A0D9SG66;A0A087X2E5;O43837-3;O43837-2	Isocitrate dehydrogenase [NAD] subunit, mitochondrial;Isocitrate dehydrogenase [NAD] subunit beta, mitochondrial	IDH3B
NaN	NaN	NaN	NaN	NaN	7.97016	NaN	NaN	NaN	NaN	NaN	NaN					anatomical structure morphogenesis;biological regulation;cell differentiation;cell morphogenesis;cell morphogenesis involved in differentiation;cell morphogenesis involved in neuron differentiation;cellular component morphogenesis;cellular component organization;cellular component organization or biogenesis;cellular developmental process;cellular process;detection of abiotic stimulus;detection of…	catalytic activity;hydrolase activity;hydrolase activity, acting on ester bonds;phosphatase activity;phosphoprotein phosphatase activity;phosphoric ester hydrolase activity;protein tyrosine phosphatase activity	cell part;integral to membrane;intracellular non-membrane-bounded organelle;intracellular organelle;intracellular part;intrinsic to membrane;membrane part;non-membrane-bounded organelle;organelle;stereocilium bundle	fn3;Y_phosphatase		1	1	1	0.8	0.8	0.8	257.26	2.0633	1577100000	8444500	1568700000	0	NaN	0	7.87016	0	NaN	0	NaN	A0A087WZU1;A0A087X0B9;Q9UMZ3	A0A087WZU1;A0A087X0B9;Q9UMZ3	Protein-tyrosine-phosphatase;Phosphatidylinositol phosphatase PTPRQ	PTPRQ
-0.407631	-0.264824	-0.174963	-0.263369	-0.363475	0.0186342	-1.01333	-0.971827	-1.01976	-1.19796	-1.22877	-1.0136			+	+	anatomical structure morphogenesis;biological regulation;cell morphogenesis;cell morphogenesis involved in differentiation;cellular component morphogenesis;cellular component organization;cellular component organization or biogenesis;cellular developmental process;cellular process;developmental process;epithelial to mesenchymal transition;negative regulation of biological process;negative regulat…	binding;mRNA binding;nucleic acid binding;nucleotide binding;RNA binding	cell part;cytoplasm;intracellular membrane-bounded organelle;intracellular organelle;intracellular organelle part;intracellular part;macromolecular complex;membrane-bounded organelle;nuclear part;nucleoplasm;nucleus;organelle;organelle part;ribonucleoprotein complex	CBFNT;RRM_1		8	8	8	28.8	28.8	28.8	36.558	118.49	323460000	211290000	112170000	1.52335	-0.382473	0.92799	-0.302737	3.73082	-1.10164	2.53896	-1.24678	A0A087WZV1;D6R9P3;D6RD18;D6RBZ0;Q99729-3;Q99729-2;Q99729-4;Q99729	A0A087WZV1;D6R9P3;D6RD18;D6RBZ0;Q99729-3;Q99729-2;Q99729-4;Q99729	Heterogeneous nuclear ribonucleoprotein A/B	HNRNPAB
NaN	NaN	NaN	NaN	NaN	NaN	NaN	-0.688613	-0.859719	-1.03404	-1.06824	-0.724826					cellular macromolecule metabolic process;cellular metabolic process;cellular nitrogen compound metabolic process;cellular process;gene expression;macromolecule metabolic process;metabolic process;mRNA metabolic process;mRNA processing;nitrogen compound metabolic process;nuclear mRNA splicing, via spliceosome;nucleic acid metabolic process;nucleobase-containing compound metabolic process;primary m…		catalytic step 2 spliceosome;cell part;intracellular membrane-bounded organelle;intracellular organelle;intracellular organelle part;intracellular part;macromolecular complex;membrane-bounded organelle;nuclear part;nucleoplasm;nucleus;organelle;organelle part;ribonucleoprotein complex;spliceosomal complex;U12-type spliceosomal complex	DUF382;PSP;SAP	Spliceosome	10	10	10	11.5	11.5	11.5	97.584	19.129	65991000	41715000	24275000	0	NaN	0	NaN	1.20686	-0.874166	1.96653	-1.04237	A0A087WZZ5;Q13435;E9PPJ0;E9PJT3;E9PJ04;H0YCG1;E9PIL8;H0YEX5	A0A087WZZ5;Q13435;E9PPJ0;E9PJT3;E9PJ04;H0YCG1	Splicing factor 3B subunit 2	SF3B2
-0.619071	NaN	NaN	NaN	NaN	NaN	NaN	NaN	NaN	NaN	NaN	NaN					biological regulation;cellular component organization;cellular component organization or biogenesis;cellular macromolecule metabolic process;cellular membrane organization;cellular metabolic process;cellular process;cellular protein metabolic process;cellular response to chemical stimulus;cellular response to hypoxia;cellular response to organic substance;cellular response to oxygen levels;cellul…	adenyl nucleotide binding;adenyl ribonucleotide binding;ATP binding;binding;chaperone binding;nucleotide binding;protein binding;purine nucleotide binding;purine ribonucleoside triphosphate binding;purine ribonucleotide binding;ribonucleotide binding	adherens junction;anchoring junction;cell junction;cell part;cell-substrate adherens junction;cell-substrate junction;cytoplasmic membrane-bounded vesicle lumen;cytoplasmic part;cytoplasmic vesicle part;endocytic vesicle lumen;endoplasmic reticulum;endoplasmic reticulum lumen;endoplasmic reticulum part;extracellular membrane-bounded organelle;extracellular organelle;extracellular region;extracell…	HSP70	Protein processing in endoplasmic reticulum	2	2	2	2.5	2.5	2.5	104.78	3.919	2435800	1358100	1077800	0	-0.719071	0	NaN	0	NaN	0	NaN	A0A087X054;Q9Y4L1;E9PJ21;A0A087WWI4;K7EQK2;Q9Y4L1-2	A0A087X054;Q9Y4L1;E9PJ21;A0A087WWI4;K7EQK2;Q9Y4L1-2	Hypoxia up-regulated protein 1	HYOU1
NaN	NaN	NaN	-0.357178	NaN	0.0140695	-0.0589388	-0.159138	-0.238289	0.273814	0.104068	0.257614					anatomical structure formation involved in morphogenesis;apoptosis;biological regulation;blastocyst formation;carbohydrate homeostasis;cell death;cell junction assembly;cell junction organization;cell-cell junction assembly;cell-cell junction organization;cellular chemical homeostasis;cellular component assembly;cellular component assembly at cellular level;cellular component disassembly;cellular…		adherens junction;anchoring junction;apical junction complex;apical part of cell;apical plasma membrane;apicolateral plasma membrane;basolateral plasma membrane;cell junction;cell part;cell-cell adherens junction;cell-cell contact zone;cell-cell junction;cytoplasm;cytoplasmic part;cytosol;gap junction;intercalated disc;intercellular canaliculus;intracellular membrane-bounded organelle;intracellul…	Guanylate_kin;PDZ;SH3_2;ZU5	Adherens junction;Epithelial cell signaling in Helicobacter pylori infection;Gap junction;Tight junction;Vibrio cholerae infection	35	35	35	24.2	24.2	24.2	187.85	247.08	375380000	171580000	203790000	0	NaN	0.418253	-0.271554	1.39959	-0.252122	0.757979	0.111832	A0A087X0K9;G5E9E7;Q07157-2;G3V1L9;Q07157;H0YKB1;H0Y3R8;H0YLT6	A0A087X0K9;G5E9E7;Q07157-2;G3V1L9;Q07157	Tight junction protein ZO-1	TJP1
NaN	NaN	NaN	NaN	NaN	NaN	NaN	NaN	NaN	NaN	NaN	NaN					biological regulation;negative regulation of biological process;negative regulation of cell communication;negative regulation of cellular process;negative regulation of growth hormone receptor signaling pathway;negative regulation of intracellular protein kinase cascade;negative regulation of JAK-STAT cascade;negative regulation of protein localization at cell surface;negative regulation of respo…	binding;protein binding;receptor binding	cell part;cytoplasmic part;endosomal part;endosome;endosome membrane;Golgi apparatus;Golgi apparatus part;Golgi membrane;integral to membrane;intracellular membrane-bounded organelle;intracellular organelle;intracellular organelle part;intracellular part;intrinsic to membrane;membrane;membrane part;membrane-bounded organelle;organelle;organelle membrane;organelle part	Vps55		1	1	1	9.3	9.3	9.3	15.428	4.8202	708810	397320	311480	0	NaN	0	NaN	0	NaN	0	NaN	A0A087X0N2;O15243	A0A087X0N2;O15243	Leptin receptor gene-related protein	LEPROT
NaN	NaN	NaN	NaN	NaN	NaN	NaN	NaN	NaN	NaN	NaN	NaN					antigen processing and presentation;antigen processing and presentation of exogenous antigen;antigen processing and presentation of exogenous peptide antigen;antigen processing and presentation of exogenous peptide antigen via MHC class II;antigen processing and presentation of peptide antigen;antigen processing and presentation of peptide antigen via MHC class II;antigen processing and presentat…	adenyl nucleotide binding;adenyl ribonucleotide binding;ATP binding;ATPase activity;binding;catalytic activity;hydrolase activity;hydrolase activity, acting on acid anhydrides;hydrolase activity, acting on acid anhydrides, in phosphorus-containing anhydrides;kinetochore binding;microtubule motor activity;motor activity;nucleoside-triphosphatase activity;nucleotide binding;purine nucleotide bindin…	cell part;chromosomal part;chromosome;chromosome, centromeric region;condensed chromosome kinetochore;condensed chromosome outer kinetochore;condensed chromosome, centromeric region;condensed nuclear chromosome kinetochore;cytoplasm;cytoplasmic part;cytoskeletal part;cytoskeleton;cytosol;intracellular membrane-bounded organelle;intracellular non-membrane-bounded organelle;intracellular organelle;…	Kinesin		2	2	2	1	1	1	312.1	2.518	1209800	986600	223240	0	NaN	0	NaN	0	NaN	0	NaN	A0A087X0P0;Q02224-3;Q02224-2;Q02224;D6RHK2;D6RBW0	A0A087X0P0;Q02224-3;Q02224-2;Q02224;D6RHK2;D6RBW0	Kinesin-like protein;Centromere-associated protein E	CENPE
NaN	NaN	NaN	NaN	NaN	NaN	NaN	NaN	NaN	NaN	NaN	NaN					cellular metabolic process;cellular process;dephosphorylation;metabolic process;phosphate-containing compound metabolic process;phosphorus metabolic process	alkaline phosphatase activity;binding;catalytic activity;cation binding;enzyme binding;hydrolase activity;hydrolase activity, acting on ester bonds;ion binding;magnesium ion binding;metal ion binding;phosphatase activity;phosphoric ester hydrolase activity;protease binding;protein binding;transition metal ion binding;zinc ion binding	anchored to membrane;cell part;cell surface;integral to membrane;intrinsic to membrane;membrane;membrane part;plasma membrane	Alk_phosphatase	Aminobenzoate degradation;Folate biosynthesis;Two-component system	2	2	2	5.3	5.3	5.3	57.305	2.9138	645850	572880	72967	0	NaN	0	NaN	0	NaN	0	NaN	A0A087X0P5;P10696;P05187;P09923	A0A087X0P5;P10696;P05187;P09923	Alkaline phosphatase;Alkaline phosphatase, placental-like;Alkaline phosphatase, placental type;Intestinal-type alkaline phosphatase	ALPPL2;ALPP;ALPI
NaN	-0.361491	-0.359638	-0.23511	-0.704395	NaN	-0.48916	-0.144983	-0.100762	0.22132	0.153935	-0.0432148					biological regulation;cellular localization;cellular macromolecule localization;cellular process;chemical homeostasis;homeostatic process;interaction with host;interspecies interaction between organisms;intracellular mRNA localization;localization;macromolecule localization;multi-organism process;positive regulation of biological process;positive regulation of reproductive process;positive regula…	binding;double-stranded RNA binding;nucleic acid binding;RNA binding	cell body;cell part;cell projection;cytoplasm;cytoplasmic part;cytoskeletal part;dendrite;endoplasmic reticulum;extracellular membrane-bounded organelle;extracellular organelle;extracellular region part;extracellular vesicular exosome;intracellular membrane-bounded organelle;intracellular non-membrane-bounded organelle;intracellular organelle;intracellular organelle part;intracellular part;macrom…	dsrm		9	9	7	19.9	19.9	16.8	54.945	72.191	133450000	71867000	61579000	2.89273	-0.460564	0.604316	-0.569752	0.971663	-0.344968	0.0432189	0.0106802	A0A087X1A5;Q5JW30;O95793-2;O95793-3;O95793;Q5JW28;F6UDC6	A0A087X1A5;Q5JW30;O95793-2;O95793-3;O95793	Double-stranded RNA-binding protein Staufen homolog 1	STAU1
NaN	NaN	NaN	NaN	NaN	NaN	NaN	NaN	NaN	NaN	NaN	-1.72609					biological regulation;biosynthetic process;cellular biosynthetic process;cellular macromolecule biosynthetic process;cellular macromolecule metabolic process;cellular metabolic process;cellular nitrogen compound metabolic process;cellular process;macromolecule biosynthetic process;macromolecule metabolic process;metabolic process;nitrogen compound metabolic process;nucleic acid metabolic process;…	binding;core promoter proximal region DNA binding;core promoter proximal region sequence-specific DNA binding;DNA binding;nucleic acid binding;nucleic acid binding transcription factor activity;regulatory region DNA binding;regulatory region nucleic acid binding;RNA polymerase II core promoter proximal region sequence-specific DNA binding;RNA polymerase II core promoter proximal region sequence-s…	cell part;intracellular membrane-bounded organelle;intracellular organelle;intracellular part;membrane-bounded organelle;nucleus;organelle	CBF		4	4	4	4.1	4.1	4.1	114.16	8.2959	2454900	1790700	664220	0	NaN	0	NaN	0	NaN	0	-1.82609	A0A087X1N2;Q03701	A0A087X1N2;Q03701	CCAAT/enhancer-binding protein zeta	CEBPZ
NaN	NaN	NaN	NaN	NaN	NaN	NaN	NaN	NaN	NaN	NaN	NaN					actin filament-based movement;actin filament-based process;actin-mediated cell contraction;actin-myosin filament sliding;anatomical structure development;biological regulation;cellular component movement;cellular component organization;cellular component organization or biogenesis;cellular process;developmental process;muscle filament sliding;muscle organ development;muscle structure development;…	structural constituent of muscle;structural molecule activity	actin cytoskeleton;cell part;contractile fiber part;cytoplasmic part;cytoskeleton;cytosol;extracellular membrane-bounded organelle;extracellular organelle;extracellular region part;extracellular vesicular exosome;intracellular non-membrane-bounded organelle;intracellular organelle;intracellular part;membrane-bounded organelle;membrane-bounded vesicle;non-membrane-bounded organelle;organelle;organ…	Nebulin;SH3_9		3	3	3	0.4	0.4	0.4	990.84	2.8416	39519000	17189000	22330000	0	NaN	0	NaN	0	NaN	0	NaN	A0A087X1N7;P20929-4;P20929;P20929-3;P20929-2	A0A087X1N7;P20929-4;P20929;P20929-3;P20929-2	Nebulin	NEB
NaN	NaN	NaN	NaN	NaN	NaN	NaN	NaN	NaN	NaN	NaN	NaN					activation of immune response;activation of innate immune response;anatomical structure development;apoptosis;biological regulation;biosynthetic process;catabolic process;cell death;cell surface receptor linked signaling pathway;cellular biosynthetic process;cellular catabolic process;cellular component assembly;cellular component disassembly;cellular component disassembly at cellular level;cellu…	acid-amino acid ligase activity;binding;caspase inhibitor activity;caspase regulator activity;catalytic activity;cation binding;cysteine-type endopeptidase inhibitor activity;endopeptidase inhibitor activity;endopeptidase regulator activity;enzyme inhibitor activity;enzyme regulator activity;ion binding;ligase activity;ligase activity, forming carbon-nitrogen bonds;metal ion binding;peptidase inh…	CD40 receptor complex;cell part;chromosome;cytoplasm;cytoplasmic part;cytosol;internal side of plasma membrane;intracellular membrane-bounded organelle;intracellular non-membrane-bounded organelle;intracellular organelle;intracellular organelle part;intracellular part;macromolecular complex;membrane part;membrane raft;membrane-bounded organelle;non-membrane-bounded organelle;nuclear part;nucleopl…	BIR;CARD	Apoptosis;Focal adhesion;NOD-like receptor signaling pathway;Pathways in cancer;Small cell lung cancer;Toxoplasmosis;Ubiquitin mediated proteolysis	2	2	2	3.7	3.7	3.7	60.423	2.0285	3018200	1408100	1610100	0	NaN	0	NaN	0	NaN	0	NaN	A0A087X2B2;E9PMH5;Q13490-2;Q13489;Q13490;E9PQZ9;E9PI77;E9PIW1;H0YDY3	A0A087X2B2;E9PMH5;Q13490-2;Q13489;Q13490;E9PQZ9;E9PI77;E9PIW1;H0YDY3	Baculoviral IAP repeat-containing protein 2;Baculoviral IAP repeat-containing protein 3	BIRC2;BIRC3
-0.0543474	-0.182262	-0.094264	0.10165	-0.328018	-0.146467	0.259785	0.220701	0.248292	-0.187477	-0.164787	-0.12455			+		biological regulation;biosynthetic process;cellular biosynthetic process;cellular component assembly;cellular component assembly at cellular level;cellular component organization;cellular component organization at cellular level;cellular component organization or biogenesis;cellular component organization or biogenesis at cellular level;cellular macromolecular complex assembly;cellular macromolec…	adenyl nucleotide binding;adenyl ribonucleotide binding;ATP binding;ATPase activity;ATPase activity, coupled;ATP-dependent helicase activity;ATP-dependent RNA helicase activity;binding;catalytic activity;chromatin binding;DNA binding;DNA/RNA helicase activity;double-stranded RNA binding;exonuclease activity;helicase activity;hydrolase activity;hydrolase activity, acting on acid anhydrides;hydrola…	cell part;cleavage body;cytoplasm;cytoplasmic part;intracellular membrane-bounded organelle;intracellular non-membrane-bounded organelle;intracellular organelle;intracellular organelle part;intracellular part;macromolecular complex;membrane;membrane-bounded organelle;non-membrane-bounded organelle;nuclear body;nuclear part;nucleolus;nucleoplasm;nucleoplasm part;nucleus;organelle;organelle part;pr…	DEAD;Helicase_C;SPRY		27	27	27	46.3	46.3	46.3	73.975	138.08	593160000	308740000	284420000	1.51143	-0.210291	0.670604	-0.224279	2.1858	0.142926	2.30006	-0.258938	A0A087X2G1;F1T0B3;Q92499;Q92499-3;Q92499-2	A0A087X2G1;F1T0B3;Q92499;Q92499-3;Q92499-2	ATP-dependent RNA helicase DDX1	DDX1
NaN	NaN	NaN	NaN	NaN	NaN	NaN	NaN	NaN	2.67052	NaN	1.17977					activation of immune response;activation of innate immune response;anaphase-promoting complex-dependent proteasomal ubiquitin-dependent protein catabolic process;antigen processing and presentation;antigen processing and presentation of exogenous antigen;antigen processing and presentation of exogenous peptide antigen;antigen processing and presentation of exogenous peptide antigen via MHC class …	adenyl nucleotide binding;adenyl ribonucleotide binding;ATP binding;ATPase activity;binding;binding, bridging;catalytic activity;hydrolase activity;hydrolase activity, acting on acid anhydrides;hydrolase activity, acting on acid anhydrides, in phosphorus-containing anhydrides;nucleoside-triphosphatase activity;nucleotide binding;protein binding;protein binding, bridging;purine nucleotide binding;…	cell part;cytoplasmic part;cytosol;cytosolic part;cytosolic proteasome complex;extracellular membrane-bounded organelle;extracellular organelle;extracellular region part;extracellular vesicular exosome;inclusion body;intracellular membrane-bounded organelle;intracellular organelle;intracellular organelle part;intracellular part;macromolecular complex;membrane;membrane-bounded organelle;membrane-b…	AAA	Proteasome	4	4	4	12.9	12.9	12.9	45.796	10.386	10447000	2746500	7700400	0	NaN	0	NaN	0	NaN	0.6076	1.82514	A0A087X2I1;P62333;H0YJC0;H0YJS8;H0YJE9;H0YJT1	A0A087X2I1;P62333;H0YJC0;H0YJS8	26S protease regulatory subunit 10B	PSMC6
NaN	NaN	NaN	NaN	NaN	NaN	NaN	NaN	NaN	NaN	NaN	NaN					aerobic respiration;AMP biosynthetic process;AMP metabolic process;biosynthetic process;cellular aromatic compound metabolic process;cellular biosynthetic process;cellular component assembly;cellular component organization;cellular component organization or biogenesis;cellular metabolic process;cellular nitrogen compound biosynthetic process;cellular nitrogen compound metabolic process;cellular p…	(S)-2-(5-amino-1-(5-phospho-D-ribosyl)imidazole-4-carboxamido)succinate AMP-lyase (fumarate-forming) activity;amidine-lyase activity;carbon-nitrogen lyase activity;catalytic activity;lyase activity;N6-(1,2-dicarboxyethyl)AMP AMP-lyase (fumarate-forming) activity	cell part;cytoplasmic part;cytosol;intracellular membrane-bounded organelle;intracellular organelle;intracellular part;membrane-bounded organelle;mitochondrion;organelle	ADSL_C;Lyase_1	Alanine, aspartate and glutamate metabolism;Purine metabolism	2	2	2	6.1	6.1	6.1	40.826	3.373	8369800	3572500	4797300	0	NaN	0	NaN	0	NaN	0	NaN	A0A096LNY6;A0A0A6YY92;P30566	A0A096LNY6;A0A0A6YY92;P30566	Adenylosuccinate lyase	ADSL
4.35241	0.54092	5.31951	3.26659	3.31526	3.50297	1.89325	4.44208	3.96993	NaN	1.00511	2.48135		+			anion transport;biological regulation;establishment of localization;ion transport;negative regulation of biological process;negative regulation of cellular component organization;negative regulation of cellular process;negative regulation of protein complex assembly;negative regulation of protein polymerization;regulation of biological process;regulation of cellular component biogenesis;regulatio…	anion channel activity;anion transmembrane transporter activity;binding;channel activity;gated channel activity;ion channel activity;ion transmembrane transporter activity;nucleotide binding;passive transmembrane transporter activity;porin activity;substrate-specific channel activity;substrate-specific transmembrane transporter activity;substrate-specific transporter activity;transmembrane transp…	cell part;cytoplasmic part;extracellular membrane-bounded organelle;extracellular organelle;extracellular region part;extracellular vesicular exosome;integral to membrane;intracellular membrane-bounded organelle;intracellular non-membrane-bounded organelle;intracellular organelle;intracellular organelle part;intracellular part;intrinsic to membrane;macromolecular complex;membrane;membrane part;me…	Porin_3	Calcium signaling pathway;Huntington's disease;Parkinson's disease	14	14	14	62.8	62.8	62.8	30.348	175.51	688390000	97235000	591150000	0.818923	3.30428	3.31176	3.26161	1.29303	3.33509	0.570624	1.64323	A0A0A0MR02;P45880;P45880-2;P45880-1;Q5JSD2;Q5JSD1;A2A3S1	A0A0A0MR02;P45880;P45880-2;P45880-1;Q5JSD2;Q5JSD1	Voltage-dependent anion-selective channel protein 2	VDAC2
NaN	NaN	NaN	NaN	NaN	NaN	NaN	NaN	NaN	NaN	-0.950146	-1.16127					3'-UTR-mediated mRNA stabilization;biological regulation;cellular macromolecule metabolic process;cellular metabolic process;cellular nitrogen compound metabolic process;cellular process;macromolecule metabolic process;metabolic process;mRNA metabolic process;mRNA processing;mRNA stabilization;negative regulation of biological process;negative regulation of biosynthetic process;negative regulatio…	binding;cation binding;identical protein binding;ion binding;metal ion binding;nucleic acid binding;nucleotide binding;protein binding;protein complex binding;transition metal ion binding;zinc ion binding	cell part;intracellular membrane-bounded organelle;intracellular organelle;intracellular organelle part;intracellular part;membrane-bounded organelle;nuclear part;nucleoplasm;nucleus;organelle;organelle part	G-patch;zf-RanBP		4	4	4	5	5	5	110.36	5.5727	10061000	6508500	3552000	0	NaN	0	NaN	0	NaN	1.23667	-1.15571	A0A0A0MR66;P98175-4;P98175-3;P98175-2;P98175	A0A0A0MR66;P98175-4;P98175-3;P98175-2;P98175	RNA-binding protein 10	RBM10
NaN	NaN	NaN	NaN	NaN	NaN	NaN	NaN	0.54409	0.481609	0.309991	0.295018					actin cytoskeleton organization;actin filament-based process;anatomical structure formation involved in morphogenesis;anatomical structure morphogenesis;apoptosis;biological regulation;cell death;cell junction assembly;cell junction organization;cell part morphogenesis;cell projection morphogenesis;cell projection organization;cell-cell junction assembly;cell-cell junction organization;cellular c…	structural constituent of cytoskeleton;structural molecule activity	axolemma;axon part;cell junction;cell part;cell projection membrane;cell projection part;cell-cell junction;cytoplasm;cytoskeleton;extrinsic to membrane;intracellular non-membrane-bounded organelle;intracellular organelle;intracellular part;juxtaparanode region of axon;leading edge membrane;membrane;membrane part;neuron projection membrane;non-membrane-bounded organelle;organelle;paranode region …	4_1_CTD;FA;FERM_C;FERM_M;FERM_N;SAB	Tight junction	3	3	3	13.8	13.8	13.8	35.419	7.6042	8831400	3561800	5269500	0	NaN	0	NaN	0	0.44409	1.31547	0.262206	A0A0J9YY18;A8K968;A0A0A0MRA8;Q9Y2J2-2;Q9Y2J2-4;Q9Y2J2;A0A0J9YW31	A0A0J9YY18;A8K968;A0A0A0MRA8;Q9Y2J2-2;Q9Y2J2-4;Q9Y2J2;A0A0J9YW31	Band 4.1-like protein 3;Band 4.1-like protein 3, N-terminally processed	EPB41L3
-0.716955	-0.829178	-0.579167	-0.410237	-0.488694	-0.385903	0.413377	0.607768	0.295253	0.295723	0.240131	0.152768					amine metabolic process;carboxylic acid metabolic process;cellular amine metabolic process;cellular amino acid metabolic process;cellular ketone metabolic process;cellular macromolecule metabolic process;cellular metabolic process;cellular modified amino acid metabolic process;cellular nitrogen compound metabolic process;cellular process;cellular protein metabolic process;coenzyme metabolic proce…	carboxyl-O-methyltransferase activity;catalytic activity;methyltransferase activity;O-methyltransferase activity;protein carboxyl O-methyltransferase activity;protein methyltransferase activity;protein-L-isoaspartate (D-aspartate) O-methyltransferase activity;S-adenosylmethionine-dependent methyltransferase activity;transferase activity;transferase activity, transferring one-carbon groups	cell part;cytoplasm;cytoplasmic part;endoplasmic reticulum;extracellular membrane-bounded organelle;extracellular organelle;extracellular region part;extracellular vesicular exosome;intracellular membrane-bounded organelle;intracellular organelle;intracellular part;membrane-bounded organelle;membrane-bounded vesicle;organelle;vesicle	PCMT		11	11	11	40.7	40.7	40.7	30.315	114.41	619710000	369200000	250510000	2.10221	-0.808433	2.46485	-0.528278	1.18503	0.3388	1.04807	0.129541	A0A0A0MRJ6;H7BY58;P22061;P22061-2;F6S8N6;C9J0F2;F8WDT3;F8WAV5;F8WAX2;H7C4X2	A0A0A0MRJ6;H7BY58;P22061;P22061-2;F6S8N6	Protein-L-isoaspartate O-methyltransferase;Protein-L-isoaspartate(D-aspartate) O-methyltransferase	PCMT1
NaN	NaN	NaN	NaN	NaN	NaN	0.234011	0.201508	0.238175	NaN	1.05165	1.44806					anatomical structure formation involved in morphogenesis;anatomical structure morphogenesis;axon guidance;biological regulation;cell projection assembly;cell projection organization;cellular component assembly;cellular component assembly at cellular level;cellular component assembly involved in morphogenesis;cellular component organization;cellular component organization at cellular level;cellula…	actin binding;binding;cation binding;cytoskeletal protein binding;ion binding;metal ion binding;protein binding;transition metal ion binding;zinc ion binding	actin cytoskeleton;actin filament bundle;actomyosin;cell part;cell projection;cytoplasm;cytoskeletal part;cytoskeleton;intracellular non-membrane-bounded organelle;intracellular organelle;intracellular organelle part;intracellular part;lamellipodium;non-membrane-bounded organelle;organelle;organelle part;stress fiber	LIM;VHP	Axon guidance	9	9	9	15.7	15.7	15.7	81.104	26.069	24434000	9959300	14475000	0	NaN	0	NaN	2.06816	0.124565	0.9639	1.14985	F8W8M4;A0A0A0MRL6;O14639-2;O14639-6;O14639;J3QSX6;O14639-4;O14639-3;O14639-5;H0Y7N6;F6XFR5	F8W8M4;A0A0A0MRL6;O14639-2;O14639-6;O14639;J3QSX6;O14639-4;O14639-3;O14639-5	Actin-binding LIM protein 1	ABLIM1
NaN	NaN	NaN	NaN	NaN	NaN	1.30024	1.12002	1.25677	1.97074	1.98295	2.20239			+	+	actin filament-based movement;actin filament-based process;anatomical structure development;anatomical structure morphogenesis;auditory receptor cell differentiation;behavior;biological regulation;cell communication;cell differentiation;cell projection organization;cell-cell signaling;cellular component assembly;cellular component assembly at cellular level;cellular component movement;cellular co…	actin binding;actin filament binding;adenyl nucleotide binding;adenyl ribonucleotide binding;ADP binding;ATP binding;binding;calmodulin binding;catalytic activity;cytoskeletal protein binding;hydrolase activity;hydrolase activity, acting on acid anhydrides;hydrolase activity, acting on acid anhydrides, in phosphorus-containing anhydrides;microfilament motor activity;minus-end directed microfilame…	apical part of cell;axon;cell body;cell cortex;cell part;cell projection;cell projection membrane;cell projection part;clathrin coated vesicle membrane;coated pit;coated vesicle membrane;cytoplasm;cytoplasmic membrane-bounded vesicle;cytoplasmic part;cytoplasmic vesicle;cytoplasmic vesicle membrane;cytoplasmic vesicle part;cytoskeletal part;cytosol;DNA-directed RNA polymerase II, holoenzyme;endoc…	Myosin_head		34	34	34	32.1	32.1	32.1	145.01	323.31	312440000	71002000	241440000	0	NaN	0	NaN	2.63477	1.12568	2.82878	1.95203	A0A0A0MRM8;Q9UM54-6;A0A0D9SGC1;E7EW20;Q9UM54-5;Q9UM54-2;Q9UM54-4;Q9UM54-1;Q9UM54;Q5JVM0	A0A0A0MRM8;Q9UM54-6;A0A0D9SGC1;E7EW20;Q9UM54-5;Q9UM54-2;Q9UM54-4;Q9UM54-1;Q9UM54	Unconventional myosin-VI	MYO6
NaN	NaN	NaN	NaN	NaN	NaN	NaN	NaN	-2.1583	NaN	-1.52579	NaN					cell cycle;cell cycle phase;cell cycle process;cellular component organization;cellular component organization at cellular level;cellular component organization or biogenesis;cellular component organization or biogenesis at cellular level;cellular macromolecule metabolic process;cellular metabolic process;cellular nitrogen compound metabolic process;cellular process;macromolecule metabolic proces…	adenyl nucleotide binding;adenyl ribonucleotide binding;ATP binding;binding;GTP binding;guanyl nucleotide binding;guanyl ribonucleotide binding;nucleotide binding;purine nucleotide binding;purine ribonucleoside triphosphate binding;purine ribonucleotide binding;ribonucleotide binding	Cajal body;cell part;cytoplasm;intracellular non-membrane-bounded organelle;intracellular organelle;intracellular organelle part;intracellular part;non-membrane-bounded organelle;nuclear body;nuclear part;nucleolus;nucleoplasm;nucleoplasm part;organelle;organelle part	SRP40_C		3	3	3	4.2	4.2	4.2	74.543	4.214	23974000	20263000	3710100	0	NaN	0	NaN	0	-2.2583	0	-1.62579	A0A0A0MRM9;Q14978;Q14978-3;Q14978-2;S4R402;S4R341;S4R349	A0A0A0MRM9;Q14978;Q14978-3;Q14978-2	Nucleolar and coiled-body phosphoprotein 1	NOLC1
NaN	NaN	NaN	NaN	NaN	NaN	NaN	NaN	NaN	NaN	NaN	NaN					anatomical structure development;ATP-dependent chromatin remodeling;biological regulation;biosynthetic process;brain development;cell differentiation;cellular biosynthetic process;cellular component organization;cellular component organization at cellular level;cellular component organization or biogenesis;cellular component organization or biogenesis at cellular level;cellular developmental proc…	adenyl nucleotide binding;adenyl ribonucleotide binding;ATP binding;ATPase activity;binding;catalytic activity;chromatin binding;DNA binding;helicase activity;hydrolase activity;hydrolase activity, acting on acid anhydrides;hydrolase activity, acting on acid anhydrides, in phosphorus-containing anhydrides;nucleic acid binding;nucleoside-triphosphatase activity;nucleotide binding;purine nucleotide…	cell part;chromatin;chromatin remodeling complex;chromosomal part;intracellular membrane-bounded organelle;intracellular organelle;intracellular organelle part;intracellular part;ISWI complex;macromolecular complex;membrane-bounded organelle;nuclear chromatin;nuclear chromosome part;nuclear part;nucleus;NURF complex;organelle;organelle part;protein complex	DBINO;HAND;Helicase_C;SLIDE;SNF2_N		9	2	2	8.5	2.6	2.6	122.86	3.4162	748850	469340	279510	0	NaN	0	NaN	0	NaN	0	NaN	A0A0A0MRP6;B7ZLQ5;P28370-2;P28370	A0A0A0MRP6;B7ZLQ5;P28370-2;P28370	Probable global transcription activator SNF2L1	SMARCA1
-0.105256	NaN	0.518132	0.179766	NaN	1.30135	NaN	0.211261	0.144568	-0.411291	NaN	-0.779918					cellular component assembly;cellular component assembly at cellular level;cellular component organization;cellular component organization at cellular level;cellular component organization or biogenesis;cellular component organization or biogenesis at cellular level;cellular macromolecular complex assembly;cellular macromolecular complex subunit organization;cellular macromolecule metabolic proces…	binding;cation binding;identical protein binding;ion binding;metal ion binding;mRNA binding;nucleic acid binding;protein binding;protein dimerization activity;protein homodimerization activity;RNA binding;single-stranded RNA binding;snRNA binding;transition metal ion binding;U1 snRNA binding;zinc ion binding	Cajal body;cell part;commitment complex;intracellular organelle part;intracellular part;macromolecular complex;nuclear body;nuclear part;nucleoplasm;nucleoplasm part;organelle part;prespliceosome;ribonucleoprotein complex;small nuclear ribonucleoprotein complex;spliceosomal complex;U1 snRNP;U2-type prespliceosome;U2-type spliceosomal complex	zf-U1	Spliceosome	3	3	3	21.7	21.7	21.7	19.687	16.361	58351000	29267000	29083000	0.102093	0.106438	0.339331	0.64056	0.589312	0.0779149	0.782793	-0.695604	A0A0A0MRR7;P09234;Q5TAL2	A0A0A0MRR7;P09234	U1 small nuclear ribonucleoprotein C	SNRPC
NaN	NaN	NaN	NaN	NaN	NaN	NaN	-0.495939	-0.697242	-1.60669	-0.928539	-1.42314					cellular macromolecule metabolic process;cellular metabolic process;cellular nitrogen compound metabolic process;cellular process;establishment of localization;establishment of localization in cell;establishment of RNA localization;intracellular transport;macromolecule metabolic process;metabolic process;ncRNA metabolic process;ncRNA processing;nitrogen compound metabolic process;nuclear export;n…		cell part;chromosome;condensed chromosome;condensed nuclear chromosome;CURI complex;cytoplasmic part;intracellular membrane-bounded organelle;intracellular non-membrane-bounded organelle;intracellular organelle;intracellular organelle part;intracellular part;macromolecular complex;membrane-bounded organelle;mitochondrion;non-membrane-bounded organelle;nuclear chromosome;nuclear part;nucleolar par…	Nrap	Ribosome biogenesis in eukaryotes	8	8	8	10.3	10.3	10.3	112.16	22.507	25288000	16756000	8532600	0	NaN	0	NaN	1.03927	-0.696591	1.70435	-1.41946	A0A0A0MRW6;Q9H6R4-2;Q9H6R4-4;Q9H6R4;Q9H6R4-3	A0A0A0MRW6;Q9H6R4-2;Q9H6R4-4;Q9H6R4;Q9H6R4-3	Nucleolar protein 6	NOL6
-2.6206	-6.08814	-5.40611	-4.12908	NaN	NaN	NaN	NaN	NaN	NaN	NaN	NaN								V-set		1	1	1	9.4	9.4	9.4	13.508	164.03	35508000000	35506000000	2007700	1.34267	-4.80495	0	-4.22908	0	NaN	0	NaN	A0A0A0MS14	A0A0A0MS14		IGHV1-45
1.60592	0.439783	0.916935	NaN	NaN	NaN	NaN	NaN	3.87135	0.283566	0.160275	-0.165596					biological regulation;cation homeostasis;chemical homeostasis;homeostatic process;ion homeostasis;iron ion homeostasis;regulation of biological quality	ion transmembrane transporter activity;substrate-specific transmembrane transporter activity;substrate-specific transporter activity;transmembrane transporter activity;transporter activity	cell part;cytoplasmic part;integral to membrane;intracellular membrane-bounded organelle;intracellular organelle;intracellular organelle part;intracellular part;intrinsic to membrane;membrane;membrane part;membrane-bounded organelle;mitochondrial membrane;mitochondrial part;mitochondrion;organelle;organelle membrane;organelle part	Mtc		7	7	7	27.1	27.1	27.1	35.503	16.608	29225000	7598000	21627000	0.921362	0.887546	0	NaN	0	3.77135	0.0169345	-0.00725171	A0A0A0MS41;Q9BWM7;S4R3N9	A0A0A0MS41;Q9BWM7;S4R3N9	Sideroflexin;Sideroflexin-3	SFXN3
NaN	NaN	NaN	NaN	NaN	NaN	-0.401387	0.171719	0.293724	0.461005	0.52707	0.710702					actin cytoskeleton organization;actin filament capping;actin filament organization;actin filament polymerization;actin filament severing;actin filament-based process;actin nucleation;actin polymerization or depolymerization;aging;anatomical structure development;anatomical structure morphogenesis;apoptosis;barbed-end actin filament capping;biological regulation;cell death;cell development;cell pa…	actin binding;binding;calcium ion binding;cation binding;cytoskeletal protein binding;ion binding;metal ion binding;myosin binding;myosin II binding;protein binding;protein domain specific binding	actin cap;actin cytoskeleton;adherens junction;anchoring junction;blood microparticle;cell cortex part;cell junction;cell part;cell projection;cell-substrate adherens junction;cell-substrate junction;cortical actin cytoskeleton;cortical cytoskeleton;cytoplasm;cytoplasmic part;cytoskeletal part;cytoskeleton;cytosol;extracellular membrane-bounded organelle;extracellular organelle;extracellular regi…	Gelsolin	Fc gamma R-mediated phagocytosis;Regulation of actin cytoskeleton	20	20	6	34	34	11.4	82.525	111.38	164380000	61044000	103340000	0	NaN	0	NaN	0.125637	-0.078648	1.60699	0.466259	A0A0A0MS51;A0A0A0MT01;P06396-2;P06396-4;P06396-3;P06396;Q5T0I0;Q5T0I1;A0A0U1RQL8;Q5T0H8;REV__H0YJM7;REV__Q6TDU7-4;REV__Q6TDU7-2;REV__Q6TDU7-3;REV__Q6TDU7;REV__F8W8F9	A0A0A0MS51;A0A0A0MT01;P06396-2;P06396-4;P06396-3;P06396	Gelsolin	GSN
-0.114254	-0.0639068	-0.0869823	-0.178355	-0.326227	-0.0662008	0.493032	0.556111	NaN	NaN	NaN	0.451963					anatomical structure development;anatomical structure formation involved in morphogenesis;androgen receptor signaling pathway;atrial cardiac muscle cell development;biological regulation;biosynthetic process;cardiac cell development;cardiac muscle cell development;cell development;cell differentiation;cellular biosynthetic process;cellular developmental process;cellular lipid metabolic process;ce…	androgen receptor binding;binding;cation binding;hormone receptor binding;identical protein binding;ion binding;metal ion binding;nuclear hormone receptor binding;protein binding;protein binding transcription factor activity;receptor binding;steroid hormone receptor binding;transcription coactivator activity;transcription cofactor activity;transcription factor binding;transcription factor binding…	actin cytoskeleton;adherens junction;anchoring junction;cell junction;cell part;cell-substrate adherens junction;cell-substrate junction;contractile fiber part;cytoplasmic part;cytoskeleton;focal adhesion;intracellular membrane-bounded organelle;intracellular non-membrane-bounded organelle;intracellular organelle;intracellular organelle part;intracellular part;M band;membrane-bounded organelle;no…	LIM	Osteoclast differentiation	9	9	9	28	28	28	44.205	29.526	111500000	60624000	50874000	2.22817	-0.188381	1.21335	-0.290261	1.32602	0.424571	0	0.351963	J3KNW4;A0A0A0MSG2;Q14192	J3KNW4;A0A0A0MSG2;Q14192	Four and a half LIM domains protein 2	FHL2
NaN	2.96457	NaN	NaN	NaN	NaN	NaN	NaN	NaN	NaN	NaN	NaN					amide transport;antigen processing and presentation;antigen processing and presentation of endogenous antigen;antigen processing and presentation of endogenous peptide antigen;antigen processing and presentation of endogenous peptide antigen via MHC class I;antigen processing and presentation of exogenous antigen;antigen processing and presentation of exogenous peptide antigen;antigen processing …	active transmembrane transporter activity;antigen binding;ATPase activity;ATPase activity, coupled;ATPase activity, coupled to movement of substances;ATPase activity, coupled to transmembrane movement of substances;binding;catalytic activity;hydrolase activity;hydrolase activity, acting on acid anhydrides;hydrolase activity, acting on acid anhydrides, catalyzing transmembrane movement of substanc…	cell part;cytoplasmic part;endoplasmic reticulum;endoplasmic reticulum membrane;endoplasmic reticulum part;Golgi apparatus part;Golgi membrane;integral to endoplasmic reticulum membrane;integral to lumenal side of endoplasmic reticulum membrane;integral to membrane;integral to organelle membrane;intracellular membrane-bounded organelle;intracellular organelle;intracellular organelle part;intracel…	C1-set	Antigen processing and presentation	3	3	3	7.6	7.6	7.6	47.606	4.3317	8398500	780350	7618100	0	2.86457	0	NaN	0	NaN	0	NaN	A0A0G2JKZ1;A2AB90;A0A0G2JH37;A0A0A0MSV9;O15533-2;O15533;O15533-3;Q6P1N7;C9JA35;A0A0A0MT98;O15533-4	A0A0G2JKZ1;A2AB90;A0A0G2JH37;A0A0A0MSV9;O15533-2;O15533;O15533-3;Q6P1N7;C9JA35	Tapasin	TAPBP
NaN	NaN	NaN	NaN	NaN	NaN	-0.377088	NaN	NaN	NaN	NaN	NaN					biological regulation;biosynthetic process;carbohydrate metabolic process;carbohydrate transport;cell cycle;cell cycle process;cell surface receptor linked signaling pathway;cellular biosynthetic process;cellular component disassembly;cellular component disassembly at cellular level;cellular component organization;cellular component organization at cellular level;cellular component organization o…	nucleocytoplasmic transporter activity;transporter activity	adherens junction;anchoring junction;cell junction;cell part;cell-substrate adherens junction;cell-substrate junction;cytoplasmic part;cytosol;focal adhesion;intracellular membrane-bounded organelle;intracellular organelle;intracellular organelle part;intracellular part;macromolecular complex;membrane part;membrane-bounded organelle;nuclear part;nuclear pore;nucleoplasm;nucleus;organelle;organell…		RNA transport	2	2	2	1.6	1.6	1.6	152.57	5.2164	1349300	815480	533870	0	NaN	0	NaN	0	-0.477088	0	NaN	A0A0A0MSW3;P35658-2;P35658-4;P35658;P35658-3;P35658-5	A0A0A0MSW3;P35658-2;P35658-4;P35658;P35658-3;P35658-5	Nuclear pore complex protein Nup214	NUP214
NaN	0.123799	NaN	NaN	-0.246686	-0.675973	1.36508	0.871528	0.991753	1.10923	0.367259	NaN					amine metabolic process;amino acid activation;carboxylic acid metabolic process;cell differentiation;cellular amine metabolic process;cellular amino acid metabolic process;cellular developmental process;cellular ketone metabolic process;cellular macromolecule metabolic process;cellular metabolic process;cellular nitrogen compound metabolic process;cellular process;developmental process;gene expre…	adenyl nucleotide binding;adenyl ribonucleotide binding;aminoacyl-tRNA editing activity;aminoacyl-tRNA ligase activity;ATP binding;binding;carboxylic ester hydrolase activity;catalytic activity;enzyme binding;GTPase binding;hydrolase activity;hydrolase activity, acting on ester bonds;isoleucine-tRNA ligase activity;ligase activity;ligase activity, forming aminoacyl-tRNA and related compounds;liga…	cell part;cytoplasm;cytoplasmic part;cytosol;extracellular membrane-bounded organelle;extracellular organelle;extracellular region part;extracellular vesicular exosome;intracellular organelle part;intracellular part;membrane;membrane-bounded organelle;membrane-bounded vesicle;nuclear part;nucleoplasm;organelle;organelle part;vesicle	Anticodon_1;tRNA-synt_1	Aminoacyl-tRNA biosynthesis;Valine, leucine and isoleucine biosynthesis	6	6	6	5.2	5.2	5.2	131.76	13.695	22067000	8762300	13304000	0	0.0237986	0.633556	-0.56133	1.64982	0.976119	0.474701	0.638243	J3KR24;A0A0A0MSX9;P41252;Q5TCD1	J3KR24;A0A0A0MSX9;P41252	Isoleucine--tRNA ligase, cytoplasmic	IARS
NaN	NaN	NaN	NaN	NaN	NaN	NaN	NaN	NaN	NaN	NaN	NaN					anatomical structure development;anatomical structure formation involved in morphogenesis;anatomical structure morphogenesis;aortic smooth muscle cell differentiation;appendage morphogenesis;ATP-dependent chromatin remodeling;biological regulation;blastocyst growth;blastocyst hatching;cell development;cell differentiation;cell fate determination;cell morphogenesis;cellular component disassembly;c…	adenyl nucleotide binding;adenyl ribonucleotide binding;androgen receptor binding;ATP binding;ATPase activity;ATPase activity, coupled;binding;catalytic activity;chromatin binding;DNA binding;DNA polymerase binding;DNA-dependent ATPase activity;enzyme binding;helicase activity;histone acetyl-lysine binding;histone binding;hormone receptor binding;hydrolase activity;hydrolase activity, acting on a…	cell part;chromatin;chromatin remodeling complex;chromosomal part;euchromatin;extracellular region part;extracellular space;heterochromatin;intracellular membrane-bounded organelle;intracellular non-membrane-bounded organelle;intracellular organelle;intracellular organelle part;intracellular part;macromolecular complex;membrane;membrane-bounded organelle;nBAF complex;non-membrane-bounded organell…	BRK;Bromodomain;Helicase_C;HSA;QLQ;SnAC;SNF2_N		3	3	3	2.2	2.2	2.2	188.15	5.0615	3881200	2203000	1678200	0	NaN	0	NaN	0	NaN	0	NaN	Q9HBD4;A0A0A0MT49;P51532-5;P51532-2;P51532-3;P51532-4;P51532	Q9HBD4;A0A0A0MT49;P51532-5;P51532-2;P51532-3;P51532-4;P51532	Transcription activator BRG1	SMARCA4
NaN	NaN	NaN	NaN	NaN	NaN	-1.12932	-1.14966	NaN	-1.32232	-3.95366	NaN			+		anatomical structure homeostasis;biological regulation;cellular macromolecule metabolic process;cellular metabolic process;cellular nitrogen compound metabolic process;cellular process;homeostatic process;macromolecule metabolic process;metabolic process;multicellular organismal process;ncRNA metabolic process;ncRNA processing;neurological system process;nitrogen compound metabolic process;nuclei…		cell part;intracellular non-membrane-bounded organelle;intracellular organelle;intracellular organelle part;intracellular part;macromolecular complex;non-membrane-bounded organelle;nuclear part;nucleolar part;nucleolus;organelle;organelle part;preribosome;protein complex;Pwp2p-containing subcomplex of 90S preribosome;ribonucleoprotein complex;small-subunit processome	Utp21;WD40	Ribosome biogenesis in eukaryotes	5	5	5	6.3	6.3	6.3	99.365	6.4135	43608000	41772000	1836200	0	NaN	0	NaN	2.28203	-1.23949	0.544895	-2.73799	A0A0A0MTB8;Q8NI36	A0A0A0MTB8;Q8NI36	WD repeat-containing protein 36	WDR36
NaN	NaN	NaN	NaN	NaN	0.0119249	NaN	NaN	NaN	NaN	NaN	NaN					establishment of localization;transport	binding;double-stranded RNA binding;nucleic acid binding;RNA binding	cell part;cytoplasmic part;cytoskeletal part;endoplasmic reticulum;intracellular membrane-bounded organelle;intracellular non-membrane-bounded organelle;intracellular organelle;intracellular organelle part;intracellular part;macromolecular complex;membrane;membrane-bounded organelle;microtubule;non-membrane-bounded organelle;nuclear part;nucleolus;organelle;organelle part;protein complex	dsrm		5	3	3	18.4	13.8	13.8	34.861	4.5966	5760600	2862000	2898600	0	NaN	0	-0.0880751	0	NaN	0	NaN	E5RJN7;A0A0A0MTC4;A0A0A0MTD1;F8VPI7;E7EPX0;A0A0A0MTC6;E7EVJ4;E9PH62;A0A0A0MTC5;Q9NUL3-6;Q9NUL3-8;Q9NUL3-3;Q9NUL3-7;Q9NUL3-2;Q9NUL3;G5EA18;E7EVI1;Q9NUL3-4;E5RJ67;H0YBY0;E5RFK1	E5RJN7;A0A0A0MTC4;A0A0A0MTD1;F8VPI7;E7EPX0;A0A0A0MTC6;E7EVJ4;E9PH62;A0A0A0MTC5;Q9NUL3-6;Q9NUL3-8;Q9NUL3-3;Q9NUL3-7;Q9NUL3-2;Q9NUL3;G5EA18;E7EVI1;Q9NUL3-4	Double-stranded RNA-binding protein Staufen homolog 2	STAU2
NaN	0.00776951	NaN	NaN	NaN	NaN	NaN	NaN	NaN	NaN	NaN	NaN					amine metabolic process;anatomical structure development;benzene-containing compound metabolic process;carboxylic acid metabolic process;catabolic process;cell development;cellular amine metabolic process;cellular amino acid metabolic process;cellular aromatic compound metabolic process;cellular catabolic process;cellular detoxification of nitrogen compound;cellular developmental process;cellular…	amine binding;amino acid binding;binding;carboxylic acid binding;catalytic activity;enzyme binding;glutathione binding;glutathione transferase activity;identical protein binding;modified amino acid binding;peptide binding;protein binding;protein dimerization activity;protein homodimerization activity;transferase activity;transferase activity, transferring alkyl or aryl (other than methyl) groups	cell part;cell projection part;cytoplasm;cytoplasmic part;cytosol;extracellular membrane-bounded organelle;extracellular organelle;extracellular region part;extracellular vesicular exosome;flagellar fibrous sheath;flagellum part;intracellular membrane-bounded organelle;intracellular organelle;intracellular organelle part;intracellular part;membrane-bounded organelle;membrane-bounded vesicle;micro…	GST_C;GST_N	Drug metabolism - cytochrome P450;Glutathione metabolism;Metabolism of xenobiotics by cytochrome P450	5	5	5	23.1	23.1	23.1	24.914	6.6074	10372000	5297800	5074000	0	-0.0922305	0	NaN	0	NaN	0	NaN	A0A0A0MTN3;P21266;E9PLF1;E9PHN7;E9PHN6;Q5T8Q9;Q5T8R1;F6XZQ7;P28161-2;P46439;P28161	A0A0A0MTN3;P21266	Glutathione S-transferase Mu 3	GSTM3
NaN	NaN	NaN	NaN	NaN	NaN	NaN	NaN	NaN	0.697151	1.29977	NaN					adherens junction organization;anatomical structure formation involved in morphogenesis;angiogenesis;biological adhesion;biological regulation;calcium-dependent cell-cell adhesion;cell adhesion;cell junction assembly;cell junction organization;cell migration;cell motility;cell projection assembly;cell projection organization;cell proliferation;cell-cell adhesion;cell-cell junction organization;ce…	adiponectin binding;binding;cadherin binding;calcium ion binding;cation binding;cell adhesion molecule binding;hormone binding;ion binding;lipoprotein particle binding;low-density lipoprotein particle binding;metal ion binding;protein binding;protein-lipid complex binding	adherens junction;anchored to membrane;anchoring junction;caveola;cell junction;cell part;cell projection;cell-substrate adherens junction;cell-substrate junction;cytoplasm;external side of plasma membrane;extracellular membrane-bounded organelle;extracellular organelle;extracellular region part;extracellular space;extracellular vesicular exosome;focal adhesion;intracellular part;intrinsic to mem…	Cadherin;Cadherin_pro		2	2	2	3.7	3.7	3.7	76.968	26.325	10515000	4080300	6435200	0	NaN	0	NaN	0	NaN	0.686144	0.898462	A0A0A0MTR1;P55290;P55290-4;A0A087X0X6;P55290-3;P55290-2;P55290-5	A0A0A0MTR1;P55290;P55290-4;A0A087X0X6;P55290-3;P55290-2;P55290-5	Cadherin-13	CDH13
NaN	-0.109654	NaN	NaN	NaN	NaN	NaN	NaN	NaN	NaN	NaN	NaN					alcohol biosynthetic process;alcohol catabolic process;alcohol metabolic process;aldehyde biosynthetic process;aldehyde catabolic process;anatomical structure formation involved in morphogenesis;angiogenesis;behavior;biological regulation;biosynthetic process;carbohydrate biosynthetic process;carbohydrate catabolic process;carbohydrate metabolic process;catabolic process;cellular aldehyde metabol…	binding;carbohydrate binding;catalytic activity;glucose-6-phosphate isomerase activity;intramolecular oxidoreductase activity;intramolecular oxidoreductase activity, interconverting aldoses and ketoses;intramolecular transferase activity;isomerase activity;monosaccharide binding;sugar binding	cell part;cell projection;cytoplasm;cytoplasmic part;cytosol;extracellular membrane-bounded organelle;extracellular organelle;extracellular region part;extracellular space;extracellular vesicular exosome;intracellular organelle part;intracellular part;membrane;membrane-bounded organelle;membrane-bounded vesicle;neuron projection;nuclear part;nucleoplasm;organelle;organelle part;plasma membrane;ve…	PGI	Amino sugar and nucleotide sugar metabolism;Glycolysis / Gluconeogenesis;Pentose phosphate pathway;Starch and sucrose metabolism	4	4	4	15.7	15.7	15.7	30.37	4.3168	3716100	1922600	1793500	0	-0.209654	0	NaN	0	NaN	0	NaN	A0A0J9YXP8;A0A0J9YX90;A0A0J9YYH3;K7EQ48;A0A0A0MTS2;P06744;P06744-2;K7EP41;K7EPY4;K7EIL4;K7ERK8;K7ELR7;K7ERC6;K7ENA0;CON__Q3ZBD7	A0A0J9YXP8;A0A0J9YX90;A0A0J9YYH3;K7EQ48;A0A0A0MTS2;P06744;P06744-2;K7EP41;K7EPY4	Glucose-6-phosphate isomerase	GPI
NaN	NaN	NaN	-0.0447318	NaN	NaN	0.0734089	0.279768	0.23008	-0.541744	NaN	-0.348721					cellular component assembly;cellular component assembly at cellular level;cellular component organization;cellular component organization at cellular level;cellular component organization or biogenesis;cellular component organization or biogenesis at cellular level;cellular macromolecular complex assembly;cellular macromolecular complex subunit organization;cellular process;macromolecular complex…	binding;enzyme binding;mRNA binding;nucleic acid binding;protein binding;RNA binding	cell part;cytoplasmic part;intracellular membrane-bounded organelle;intracellular organelle;intracellular organelle part;intracellular part;macromolecular complex;membrane-bounded organelle;mitochondrion;nuclear body;nuclear part;nuclear speck;nucleoplasm part;organelle;organelle part;ribonucleoprotein complex;small nuclear ribonucleoprotein complex;U1 snRNP	LUC7		3	3	2	9.8	9.8	7.7	46.228	82.087	24563000	12308000	12256000	0	NaN	0	-0.144732	0.571497	0.0944191	0.952598	-0.545232	A0A0A6YYC3;Q96HJ9-2;A0A0A6YYJ8;Q9Y383-3;Q9Y383-2;Q9Y383	A0A0A6YYC3;Q96HJ9-2;A0A0A6YYJ8;Q9Y383-3;Q9Y383-2;Q9Y383	Putative RNA-binding protein Luc7-like 2	C7orf55-LUC7L2;LUC7L2
NaN	-0.606979	NaN	NaN	NaN	NaN	NaN	NaN	0.246712	1.51571	1.31022	NaN					actin cytoskeleton organization;actin filament organization;actin filament polymerization;actin filament-based process;actin nucleation;actin polymerization or depolymerization;Arp2/3 complex-mediated actin nucleation;axon guidance;biological regulation;cell surface receptor linked signaling pathway;cellular component assembly;cellular component assembly at cellular level;cellular component organ…	binding;enzyme binding;protein binding;structural constituent of cytoskeleton;structural molecule activity	Arp2/3 protein complex;cell part;cell projection;cytoplasmic part;cytoskeletal part;cytosol;extracellular membrane-bounded organelle;extracellular organelle;extracellular region part;extracellular vesicular exosome;intracellular organelle part;intracellular part;macromolecular complex;membrane-bounded organelle;membrane-bounded vesicle;organelle;organelle part;protein complex;vesicle	ARPC4;TTL	Bacterial invasion of epithelial cells;Fc gamma R-mediated phagocytosis;Pathogenic Escherichia coli infection;Regulation of actin cytoskeleton;Shigellosis	4	4	4	34.5	34.5	34.5	13.057	10.695	40504000	11202000	29302000	0	-0.706979	0	NaN	0	0.146712	1.3035	1.31297	F8WDD7;F8WCF6;A0A0A6YYG9;P59998;P59998-3;P59998-2;H7C0A3;F8WE39;R4GN08;P59998-4	F8WDD7;F8WCF6;A0A0A6YYG9;P59998;P59998-3;P59998-2;H7C0A3	Actin-related protein 2/3 complex subunit 4	ARPC4;ARPC4-TTLL3
NaN	NaN	NaN	NaN	NaN	NaN	NaN	NaN	NaN	NaN	NaN	NaN					adult behavior;adult locomotory behavior;adult walking behavior;anatomical structure development;anatomical structure formation involved in morphogenesis;anatomical structure morphogenesis;angiogenesis;axial mesoderm formation;axon guidance;axonal fasciculation;axonogenesis;behavior;biological adhesion;biological regulation;blood vessel endothelial cell migration;bone remodeling;brain development…	adenyl nucleotide binding;adenyl ribonucleotide binding;ATP binding;axon guidance receptor activity;binding;catalytic activity;chemorepellent activity;ephrin receptor activity;GPI-linked ephrin receptor activity;kinase activity;molecular transducer activity;nucleotide binding;PH domain binding;phosphotransferase activity, alcohol group as acceptor;protein binding;protein domain specific binding;p…	adherens junction;anchoring junction;axon;axon part;axon terminus;axonal growth cone;cell body;cell junction;cell part;cell projection;cell projection membrane;cell projection part;cell surface;cell-substrate adherens junction;cell-substrate junction;cytoplasm;cytoplasmic part;cytoskeletal part;cytosol;dendrite;dendritic spine;early endosome membrane;endoplasmic reticulum;endosomal part;endosome …	EphA2_TM;Ephrin_lbd;fn3;GCC2_GCC3;Pkinase_Tyr;SAM_1;SAM_2	Axon guidance	1	1	1	2.9	2.9	2.9	42.282	2.1775	819310	0	819310	0	NaN	0	NaN	0	NaN	0	NaN	J3KR66;Q96L35;B1AKC9;E9PG71;A0A0B4J1T8;Q9UF33-2;Q9UF33-3;P54762-5;P54764-2;P29317;P54762;P54764;P29323-2;P54760;P29323-3;Q15375-2;Q15375-4;Q15375;P54753;Q9UF33;P29323	J3KR66;Q96L35;B1AKC9;E9PG71;A0A0B4J1T8;Q9UF33-2;Q9UF33-3;P54762-5;P54764-2;P29317;P54762;P54764;P29323-2;P54760;P29323-3;Q15375-2;Q15375-4;Q15375;P54753;Q9UF33;P29323	Receptor protein-tyrosine kinase;Ephrin type-A receptor 6;Ephrin type-B receptor 1;Ephrin type-A receptor 4;Ephrin type-A receptor 2;Ephrin type-B receptor 2;Ephrin type-B receptor 4;Ephrin type-A receptor 7;Ephrin type-B receptor 3	EPHA6;EPHB4;EPHB2;EPHA4;EPHB1;EPHA2;EPHA7;EPHB3
NaN	NaN	NaN	NaN	NaN	NaN	NaN	NaN	NaN	NaN	NaN	-4.71983								V-set		1	1	1	9.2	9.2	9.2	12.926	57.56	189600000	187720000	1880200	0	NaN	0	NaN	0	NaN	0	-4.81983	A0A0B4J1V0	A0A0B4J1V0		IGHV3-15
-0.346683	-0.339327	NaN	NaN	NaN	NaN	-0.643022	NaN	-0.799471	-1.64309	-1.5547	-1.28079				+	biological regulation;biosynthetic process;cellular biosynthetic process;cellular macromolecule biosynthetic process;cellular macromolecule metabolic process;cellular metabolic process;cellular nitrogen compound metabolic process;cellular process;establishment of localization;establishment of localization in cell;establishment of RNA localization;gene expression;intracellular transport;macromolec…	binding;cation binding;ion binding;metal ion binding;nucleic acid binding;nucleotide binding;transition metal ion binding;zinc ion binding	cell part;cytoplasm;extracellular membrane-bounded organelle;extracellular organelle;extracellular region part;extracellular vesicular exosome;intracellular membrane-bounded organelle;intracellular organelle;intracellular organelle part;intracellular part;membrane-bounded organelle;membrane-bounded vesicle;nuclear part;nucleoplasm;nucleus;organelle;organelle part;vesicle	RRM_1;zf-CCHC	Spliceosome	4	3	3	32.1	21.9	21.9	15.763	9.6542	88237000	53499000	34738000	2.27692	-0.443005	0	NaN	1.21856	-0.821246	2.33205	-1.59286	A0A0B4J1Z1;C9JAB2;Q16629-3;Q16629-2;Q16629-4;Q16629	A0A0B4J1Z1;C9JAB2;Q16629-3;Q16629-2;Q16629-4;Q16629	Serine/arginine-rich splicing factor 7	SRSF7
NaN	NaN	NaN	NaN	NaN	NaN	-0.488249	0.681044	0.554736	NaN	0.591488	0.222557					axon guidance;cell cycle phase;cell cycle process;cellular component assembly;cellular component assembly at cellular level;cellular component organization;cellular component organization at cellular level;cellular component organization or biogenesis;cellular component organization or biogenesis at cellular level;cellular macromolecular complex assembly;cellular macromolecular complex subunit or…	binding;catalytic activity;G-protein coupled receptor activity;GTP binding;GTPase activity;guanyl nucleotide binding;guanyl ribonucleotide binding;hydrolase activity;hydrolase activity, acting on acid anhydrides;hydrolase activity, acting on acid anhydrides, in phosphorus-containing anhydrides;molecular transducer activity;nucleoside-triphosphatase activity;nucleotide binding;peptide binding;puri…	axon;cell body;cell part;cell periphery;cell projection;cytoplasm;cytoskeletal part;dendrite;extracellular membrane-bounded organelle;extracellular organelle;extracellular region part;extracellular vesicular exosome;integral to membrane;intracellular membrane-bounded organelle;intracellular organelle;intracellular organelle part;intracellular part;intrinsic to membrane;macromolecular complex;memb…	7tm_1;Tubulin;Tubulin_C	Gap junction;Pathogenic Escherichia coli infection;Phagosome	14	1	1	19.1	2.1	2.1	88.381	16.913	42784000	20439000	22345000	0	NaN	0	NaN	0.138955	0.149177	0.462905	0.307023	A0A0B4J269;Q13509;Q13509-2;G3V2A3;G3V5W4;G3V2R8;G3V3R4;G3V2N6	A0A0B4J269;Q13509;Q13509-2	Tubulin beta-3 chain	TUBB3
NaN	NaN	NaN	NaN	NaN	NaN	NaN	NaN	NaN	NaN	NaN	NaN					alcohol metabolic process;biosynthetic process;carboxylic acid metabolic process;cellular ketone metabolic process;cellular lipid metabolic process;cellular metabolic process;cellular process;cellular response to chemical stimulus;cellular response to hypoxia;cellular response to oxygen levels;cellular response to stimulus;cellular response to stress;cholesterol biosynthetic process;cholesterol m…	acetyl-CoA C-acyltransferase activity;C-acyltransferase activity;catalytic activity;transferase activity;transferase activity, transferring acyl groups;transferase activity, transferring acyl groups other than amino-acyl groups	cell part;cytoplasmic part;extracellular membrane-bounded organelle;extracellular organelle;extracellular region part;extracellular vesicular exosome;intracellular membrane-bounded organelle;intracellular organelle;intracellular organelle part;intracellular part;membrane;membrane-bounded organelle;membrane-bounded vesicle;mitochondrial inner membrane;mitochondrial membrane;mitochondrial part;mito…	Thiolase_C;Thiolase_N	Benzoate degradation;Fatty acid elongation in mitochondria;Fatty acid metabolism;Valine, leucine and isoleucine degradation	1	1	1	3.3	3.3	3.3	41.601	4.017	741800	277110	464690	0	NaN	0	NaN	0	NaN	0	NaN	A0A0B4J2A4;P42765	A0A0B4J2A4;P42765	3-ketoacyl-CoA thiolase, mitochondrial	ACAA2
NaN	NaN	NaN	NaN	NaN	NaN	-1.4362	-0.93305	-1.48613	NaN	NaN	NaN					cellular component assembly;cellular component assembly at cellular level;cellular component organization;cellular component organization at cellular level;cellular component organization or biogenesis;cellular component organization or biogenesis at cellular level;cellular macromolecular complex assembly;cellular macromolecular complex subunit organization;cellular macromolecule metabolic proces…	binding;nucleic acid binding;RNA binding;snoRNA binding	cell part;cytoplasm;intracellular non-membrane-bounded organelle;intracellular organelle;intracellular organelle part;intracellular part;macromolecular complex;non-membrane-bounded organelle;nuclear part;nucleolar part;nucleolus;organelle;organelle part;preribosome;protein complex;Pwp2p-containing subcomplex of 90S preribosome;ribonucleoprotein complex;small-subunit processome	Utp12;WD40	Ribosome biogenesis in eukaryotes	3	3	3	4.8	4.8	4.8	102.45	5.3051	5291300	3936600	1354700	0	NaN	0	NaN	1.7993	-1.38512	0	NaN	A0A0B4J2E5;Q15269	A0A0B4J2E5;Q15269	Periodic tryptophan protein 2 homolog	PWP2
NaN	NaN	NaN	NaN	NaN	NaN	NaN	NaN	NaN	NaN	NaN	NaN					antigen processing and presentation;antigen processing and presentation of exogenous antigen;antigen processing and presentation of exogenous peptide antigen;antigen processing and presentation of exogenous peptide antigen via MHC class II;antigen processing and presentation of peptide antigen;antigen processing and presentation of peptide antigen via MHC class I;antigen processing and presentati…		cell part;coated vesicle membrane;cytoplasmic part;cytoplasmic vesicle membrane;cytoplasmic vesicle part;cytosol;endoplasmic reticulum membrane;endoplasmic reticulum part;envelope;ER to Golgi transport vesicle membrane;extracellular membrane-bounded organelle;extracellular organelle;extracellular region part;extracellular vesicular exosome;Golgi apparatus part;Golgi membrane;intracellular organel…	WD40	Protein processing in endoplasmic reticulum;RNA transport	4	4	4	20.3	20.3	20.3	35.857	33.949	1848300	921830	926430	0	NaN	0	NaN	0	NaN	0	NaN	A0A0C4DFR6;P55735-2;P55735;P55735-3;A8MXL6;E7ERC8	A0A0C4DFR6;P55735-2;P55735;P55735-3;A8MXL6	Protein SEC13 homolog	SEC13
NaN	NaN	NaN	NaN	NaN	1.24629	0.62293	0.791356	0.486251	1.25108	1.01114	1.14978				+	actin cytoskeleton organization;actin filament organization;actin filament-based process;activation of protein kinase activity;adaptive immune response;adaptive immune response based on somatic recombination of immune receptors built from immunoglobulin superfamily domains;amyloid precursor protein metabolic process;anatomical structure development;anatomical structure morphogenesis;axon guidance…	binding;catalytic activity;channel regulator activity;cytoskeletal protein binding;enzyme binding;glutamate receptor binding;guanylate kinase activity;hydrolase activity;hydrolase activity, acting on ester bonds;ion channel binding;ionotropic glutamate receptor binding;kinase activity;kinase binding;L27 domain binding;mitogen-activated protein kinase kinase binding;nucleobase-containing compound …	axon part;basal lamina;basolateral plasma membrane;cell junction;cell part;cell projection membrane;cell projection part;cell-cell contact zone;cell-cell junction;cytoplasm;cytoplasmic part;cytoskeletal part;cytosol;endoplasmic reticulum;endoplasmic reticulum membrane;endoplasmic reticulum part;extracellular matrix part;extracellular membrane-bounded organelle;extracellular organelle;extracellula…	Guanylate_kin;L27_1;MAGUK_N_PEST;PDZ;PDZ_assoc;SH3_1	T cell receptor signaling pathway	3	3	3	5.2	5.2	5.2	71.856	14.971	21951000	8358500	13593000	0	NaN	0	1.14629	1.58039	0.533512	2.35022	1.03733	E7EQD7;A0A0C4DFT3;Q12959-8;Q12959-9;Q12959-5;Q12959-3;Q12959-6;Q12959-4;Q12959;Q12959-7;Q12959-2;C9IYP1;H7C166;B4E2H8	E7EQD7;A0A0C4DFT3;Q12959-8;Q12959-9;Q12959-5;Q12959-3;Q12959-6;Q12959-4;Q12959;Q12959-7;Q12959-2	Disks large homolog 1	DLG1
-0.0500393	-0.0230646	-0.463768	-0.814159	-0.717098	-0.476799	-0.637581	0.0885487	0.0647449	-0.142353	0.265197	0.158337					biological adhesion;biosynthetic process;catabolic process;cell adhesion;cellular biosynthetic process;cellular catabolic process;cellular component assembly;cellular component assembly at cellular level;cellular component disassembly;cellular component disassembly at cellular level;cellular component organization;cellular component organization at cellular level;cellular component organization o…	binding;laminin receptor activity;receptor activity;ribonucleoprotein binding;ribosome binding;structural constituent of ribosome;structural molecule activity	90S preribosome;cell part;cytoplasm;cytoplasmic part;cytosol;cytosolic small ribosomal subunit;extracellular membrane-bounded organelle;extracellular organelle;extracellular region part;extracellular vesicular exosome;intracellular membrane-bounded organelle;intracellular organelle;intracellular organelle part;intracellular part;macromolecular complex;membrane;membrane-bounded organelle;membrane-…	Ribosomal_S2	Ribosome	10	10	10	44.7	44.7	44.7	29.505	67.557	486180000	262530000	223650000	0.722096	-0.278957	1.7808	-0.769352	0.412442	-0.261429	0.0160733	-0.00627314	C9J9K3;A0A0C4DG17;P08865;F8WD59	C9J9K3;A0A0C4DG17;P08865;F8WD59	40S ribosomal protein SA	RPSA
NaN	NaN	NaN	NaN	0.183582	-0.503691	0.588421	NaN	1.53092	NaN	NaN	-0.888194					biological regulation;cell differentiation;cellular component organization;cellular component organization at cellular level;cellular component organization or biogenesis;cellular component organization or biogenesis at cellular level;cellular developmental process;cellular process;cytoskeletal anchoring at nuclear membrane;cytoskeleton organization;developmental process;establishment of localiza…	actin binding;actin filament binding;binding;cytoskeletal protein binding;identical protein binding;lamin binding;protein binding;protein dimerization activity;protein homodimerization activity	cell part;contractile fiber part;cytoplasm;cytoplasmic part;cytoskeleton;envelope;Golgi apparatus;integral to membrane;intracellular membrane-bounded organelle;intracellular non-membrane-bounded organelle;intracellular organelle;intracellular organelle part;intracellular part;intrinsic to membrane;macromolecular complex;membrane;membrane part;membrane-bounded organelle;non-membrane-bounded organe…	CH;KASH;Spectrin		2	2	2	0.3	0.3	0.3	964.83	4.0136	98962000	43134000	55828000	0	NaN	0.23093	-0.260055	0.536713	0.95967	0	-0.988194	E7ENN3;A0A0C4DG40;Q8NF91-8;Q8NF91-2;Q8NF91-4;Q8NF91	E7ENN3;A0A0C4DG40;Q8NF91-8;Q8NF91-2;Q8NF91-4;Q8NF91	Nesprin-1	SYNE1
NaN	-0.120404	NaN	NaN	NaN	NaN	NaN	NaN	NaN	NaN	NaN	NaN					carboxylic acid catabolic process;carboxylic acid metabolic process;catabolic process;cellular catabolic process;cellular ketone metabolic process;cellular lipid catabolic process;cellular lipid metabolic process;cellular metabolic process;cellular process;fatty acid catabolic process;fatty acid metabolic process;lipid catabolic process;lipid metabolic process;metabolic process;monocarboxylic aci…	binding;carboxylic acid binding;catalytic activity;coenzyme binding;cofactor binding;dodecenoyl-CoA delta-isomerase activity;fatty acid binding;fatty-acyl-CoA binding;intramolecular oxidoreductase activity;intramolecular oxidoreductase activity, transposing C=C bonds;isomerase activity;lipid binding;monocarboxylic acid binding;protein binding;receptor binding	cell part;cytoplasmic part;intracellular membrane-bounded organelle;intracellular organelle;intracellular organelle lumen;intracellular organelle part;intracellular part;membrane;membrane-bounded organelle;membrane-enclosed lumen;microbody lumen;microbody part;mitochondrion;nuclear part;nucleoplasm;organelle;organelle lumen;organelle part;peroxisomal matrix;peroxisomal part	ACBP;ECH	Fatty acid metabolism;Peroxisome	1	1	1	7.1	7.1	7.1	15.64	2.7149	1647200	948340	698860	0	-0.220404	0	NaN	0	NaN	0	NaN	F8WAW4;F8W6J1;F1LLU7;C9JB63;A0A0C4DGA2;O75521-2;O75521	F8WAW4;F8W6J1;F1LLU7;C9JB63;A0A0C4DGA2;O75521-2;O75521	Enoyl-CoA delta isomerase 2, mitochondrial	ECI2
NaN	NaN	NaN	NaN	NaN	NaN	NaN	NaN	NaN	1.20283	1.20733	1.25864				+	biological regulation;cellular component organization;cellular component organization at cellular level;cellular component organization or biogenesis;cellular component organization or biogenesis at cellular level;cellular membrane organization;cellular process;cytoskeleton organization;endocytosis;establishment of localization;membrane invagination;membrane organization;negative regulation of bi…	binding;calcium channel inhibitor activity;calcium channel regulator activity;channel inhibitor activity;channel regulator activity;cytoskeletal protein binding;ion channel inhibitor activity;lipid binding;phospholipid binding;protein binding	cell part;cytoplasm;cytoplasmic part;endosome;extracellular membrane-bounded organelle;extracellular organelle;extracellular region part;extracellular vesicular exosome;intracellular membrane-bounded organelle;intracellular organelle;intracellular organelle part;intracellular part;membrane;membrane-bounded organelle;membrane-bounded vesicle;nuclear part;nucleoplasm;organelle;organelle part;plasma…	FCH;SH3_1;SH3_9		6	6	6	19.8	19.8	19.8	46.494	21.241	17568000	5770000	11798000	0	NaN	0	NaN	0	NaN	3.59511	1.12293	A0A0C4DGG1;Q9UKS6;E9PIY1;E9PJ33;H0YDM6;E9PJ75;E9PNM9	A0A0C4DGG1;Q9UKS6;E9PIY1	Protein kinase C and casein kinase substrate in neurons protein 3	PACSIN3
NaN	NaN	NaN	NaN	NaN	NaN	NaN	NaN	-0.995908	-1.20287	NaN	NaN					ATP-dependent chromatin remodeling;biological regulation;biosynthetic process;cellular biosynthetic process;cellular component assembly;cellular component assembly at cellular level;cellular component organization;cellular component organization at cellular level;cellular component organization or biogenesis;cellular component organization or biogenesis at cellular level;cellular macromolecule bi…	adenyl nucleotide binding;adenyl ribonucleotide binding;ATP binding;ATPase activity;ATPase activity, coupled;ATP-dependent DNA helicase activity;ATP-dependent helicase activity;binding;catalytic activity;cation binding;DNA binding;DNA helicase activity;DNA-dependent ATPase activity;helicase activity;hydrolase activity;hydrolase activity, acting on acid anhydrides;hydrolase activity, acting on aci…	cell part;centrosome;chromatin;chromatin remodeling complex;chromosomal part;cytoplasm;cytoplasmic part;cytoskeletal part;histone deacetylase complex;intracellular membrane-bounded organelle;intracellular non-membrane-bounded organelle;intracellular organelle;intracellular organelle part;intracellular part;macromolecular complex;membrane;membrane-bounded organelle;microtubule organizing center;no…	CHDCT2;CHDNT;Chromo;DUF1086;DUF1087;Helicase_C;PHD;SNF2_N		5	5	5	3	3	3	217.1	9.7083	6567600	4536800	2030800	0	NaN	0	NaN	0	-1.09591	0	-1.30287	F5GWX5;A0A0C4DGG9;Q14839;Q14839-2;K7EMY3;Q8TDI0;F2Z2R5	F5GWX5;A0A0C4DGG9;Q14839;Q14839-2	Chromodomain-helicase-DNA-binding protein 4	CHD4
NaN	0.558562	NaN	NaN	NaN	NaN	NaN	NaN	NaN	NaN	NaN	NaN					acetyl-CoA catabolic process;acetyl-CoA metabolic process;carbohydrate metabolic process;catabolic process;cellular carbohydrate metabolic process;cellular catabolic process;cellular metabolic process;cellular process;coenzyme catabolic process;coenzyme metabolic process;cofactor catabolic process;cofactor metabolic process;metabolic process;primary metabolic process;small molecule metabolic proc…	catalytic activity;citrate (Si)-synthase activity;transferase activity;transferase activity, transferring acyl groups;transferase activity, transferring acyl groups, acyl groups converted into alkyl on transfer	cell part;cytoplasmic part;extracellular membrane-bounded organelle;extracellular organelle;extracellular region part;extracellular vesicular exosome;intracellular membrane-bounded organelle;intracellular organelle;intracellular organelle lumen;intracellular organelle part;intracellular part;membrane-bounded organelle;membrane-bounded vesicle;membrane-enclosed lumen;mitochondrial matrix;mitochond…	Citrate_synt	Citrate cycle (TCA cycle);Glyoxylate and dicarboxylate metabolism	4	4	4	11.8	11.8	11.8	44.703	8.5787	15410000	6537900	8871900	0	0.458562	0	NaN	0	NaN	0	NaN	A0A0C4DGI3;B4DJV2;O75390;H0YIC4;F8W642;F8VZK9;F8VX07;F8VRP1;F8VX68;F8VPF9;F8VPA1;F8VTT8;F8W1S4;F8W4S1;H0YH82	A0A0C4DGI3;B4DJV2;O75390;H0YIC4	Citrate synthase;Citrate synthase, mitochondrial	CS
NaN	NaN	NaN	NaN	NaN	NaN	NaN	NaN	NaN	0.449429	NaN	NaN					2'-deoxyribonucleotide biosynthetic process;2'-deoxyribonucleotide metabolic process;biosynthetic process;catabolic process;cellular aromatic compound metabolic process;cellular biosynthetic process;cellular catabolic process;cellular macromolecule biosynthetic process;cellular macromolecule metabolic process;cellular metabolic process;cellular nitrogen compound biosynthetic process;cellular nitr…	binding;catalytic activity;cation binding;dUTP diphosphatase activity;hydrolase activity;hydrolase activity, acting on acid anhydrides;hydrolase activity, acting on acid anhydrides, in phosphorus-containing anhydrides;ion binding;magnesium ion binding;metal ion binding;nucleoside-triphosphate diphosphatase activity;pyrophosphatase activity	cell part;cytoplasmic part;extracellular membrane-bounded organelle;extracellular organelle;extracellular region part;extracellular vesicular exosome;intracellular membrane-bounded organelle;intracellular organelle;intracellular organelle part;intracellular part;membrane-bounded organelle;membrane-bounded vesicle;mitochondrion;nuclear part;nucleoplasm;nucleus;organelle;organelle part;vesicle	dUTPase	Pyrimidine metabolism	2	2	2	19.1	19.1	19.1	15.395	4.5572	3121100	1086500	2034700	0	NaN	0	NaN	0	NaN	0	0.349429	A0A0C4DGL3;H0YNW5;H0YKC5;P33316-2;P33316;H0YMM5;H0YNJ9;H0YKI0	A0A0C4DGL3;H0YNW5;H0YKC5;P33316-2;P33316;H0YMM5;H0YNJ9;H0YKI0	Deoxyuridine 5-triphosphate nucleotidohydrolase, mitochondrial	DUT
NaN	NaN	0.921969	NaN	NaN	NaN	2.15358	3.05276	2.89645	NaN	NaN	2.4735					biological regulation;cellular component disassembly;cellular component disassembly at cellular level;cellular component organization;cellular component organization at cellular level;cellular component organization or biogenesis;cellular component organization or biogenesis at cellular level;cellular process;extracellular matrix disassembly;extracellular matrix organization;extracellular structu…	binding;calcium ion binding;calcium-dependent cysteine-type endopeptidase activity;catalytic activity;cation binding;cysteine-type endopeptidase activity;cysteine-type peptidase activity;endopeptidase activity;hydrolase activity;ion binding;metal ion binding;peptidase activity;peptidase activity, acting on L-amino acid peptides	cell part;cytoplasm;cytoplasmic part;cytosol;extracellular membrane-bounded organelle;extracellular organelle;extracellular region part;extracellular vesicular exosome;intracellular part;membrane;membrane-bounded organelle;membrane-bounded vesicle;organelle;plasma membrane;vesicle	EF-hand_6		6	6	6	57.7	57.7	57.7	15.958	32.635	55430000	8102700	47327000	0	0.821969	0	NaN	1.95147	2.60093	0	2.3735	K7EM73;A0A0C4DGQ5;P04632;K7EIV0;A0A075B7C0;K7ELJ7;U3KQE2;K7EKD8;U3KPR7;K7ES78;K7EMQ1	K7EM73;A0A0C4DGQ5;P04632;K7EIV0;A0A075B7C0;K7ELJ7;U3KQE2;K7EKD8	Calpain small subunit 1	CAPNS1
NaN	0.379288	2.81457	3.4665	3.60146	3.76479	2.54169	2.90475	2.84354	2.04803	2.43419	2.3208		+	+	+	biosynthetic process;carbohydrate metabolic process;cell activation;cellular biosynthetic process;cellular carbohydrate metabolic process;cellular macromolecule biosynthetic process;cellular macromolecule metabolic process;cellular metabolic process;cellular process;cellular protein metabolic process;cotranslational protein targeting to membrane;defense response;establishment of localization;esta…	catalytic activity;dolichyl-diphosphooligosaccharide-protein glycotransferase activity;oligosaccharyl transferase activity;transferase activity;transferase activity, transferring glycosyl groups;transferase activity, transferring hexosyl groups	cell part;cytoplasmic part;endoplasmic reticulum;endoplasmic reticulum membrane;endoplasmic reticulum part;integral to membrane;intracellular membrane-bounded organelle;intracellular organelle;intracellular organelle part;intracellular part;intrinsic to membrane;macromolecular complex;membrane;membrane part;membrane-bounded organelle;oligosaccharyltransferase complex;organelle;organelle membrane;…	DDOST_48kD	N-Glycan biosynthesis;Protein processing in endoplasmic reticulum;Various types of N-glycan biosynthesis	9	9	9	21.4	21.4	21.4	48.799	97.556	150920000	21445000	129480000	0.361779	1.49693	3.21981	3.51092	2.75186	2.66333	2.55546	2.16767	A0A0C4DGS1;P39656;P39656-3;P39656-2;U3KQ84	A0A0C4DGS1;P39656;P39656-3;P39656-2;U3KQ84	Dolichyl-diphosphooligosaccharide--protein glycosyltransferase 48 kDa subunit	DDOST
NaN	NaN	NaN	NaN	NaN	NaN	NaN	NaN	NaN	0.99429	NaN	0.766807					biological regulation;cell cycle;cellular process;mitotic cell cycle;negative regulation of binding;negative regulation of molecular function;negative regulation of protein binding;regulation of binding;regulation of molecular function;regulation of protein binding	binding;enzyme binding;kinase binding;protein binding;protein kinase binding;SNARE binding;syntaxin binding	cell part;cis-Golgi network;coated vesicle;cytoplasmic membrane-bounded vesicle;cytoplasmic part;cytoplasmic vesicle;ER to Golgi transport vesicle;Golgi apparatus;Golgi apparatus part;Golgi cis cisterna;Golgi cisterna;Golgi cisterna membrane;Golgi membrane;intracellular membrane-bounded organelle;intracellular organelle;intracellular organelle part;intracellular part;membrane;membrane-bounded org…			4	4	3	4.5	4.5	3.5	111.66	42.869	5464700	1932600	3532100	0	NaN	0	NaN	0	NaN	1.03565	0.780549	A0A0C4DGS5;Q08379-2;Q08379;A0A087WYC0;B7ZC06	A0A0C4DGS5;Q08379-2;Q08379	Golgin subfamily A member 2	GOLGA2
NaN	NaN	NaN	NaN	NaN	NaN	NaN	NaN	NaN	NaN	NaN	NaN					biological regulation;cellular process;cellular response to stimulus;negative regulation of biological process;negative regulation of gene expression;negative regulation of macromolecule metabolic process;negative regulation of metabolic process;negative regulation of molecular function;negative regulation of protein transport;negative regulation of transport;negative regulation of transporter ac…	binding;molecular transducer activity;protein binding;protein domain specific binding;signal transducer activity;WW domain binding	cell part;cytoplasm;cytoplasmic part;endoplasmic reticulum;endosomal part;endosome membrane;Golgi apparatus;Golgi apparatus part;Golgi membrane;integral to membrane;intracellular membrane-bounded organelle;intracellular organelle;intracellular organelle part;intracellular part;intrinsic to membrane;late endosome membrane;membrane;membrane part;membrane-bounded organelle;mitochondrion;multivesicul…	DUF2370		2	2	2	16.4	16.4	16.4	15.727	21.042	10105000	185820	9919300	0	NaN	0	NaN	0	NaN	0	NaN	H7C5F7;B4DGY6;A0A0C4DGW0;Q9NV92	H7C5F7;B4DGY6;A0A0C4DGW0;Q9NV92	NEDD4 family-interacting protein 2	NDFIP2
NaN	NaN	NaN	NaN	NaN	NaN	NaN	NaN	NaN	NaN	NaN	NaN					biosynthetic process;cellular biosynthetic process;cellular component disassembly;cellular component disassembly at cellular level;cellular component organization;cellular component organization at cellular level;cellular component organization or biogenesis;cellular component organization or biogenesis at cellular level;cellular macromolecular complex disassembly;cellular macromolecular complex …	structural constituent of ribosome;structural molecule activity	cell part;cytoplasmic part;intracellular membrane-bounded organelle;intracellular organelle;intracellular organelle part;intracellular part;large ribosomal subunit;macromolecular complex;membrane;membrane-bounded organelle;mitochondrial inner membrane;mitochondrial membrane;mitochondrial part;mitochondrion;organelle;organelle inner membrane;organelle membrane;organelle part;ribonucleoprotein comp…	Ribosomal_L22		1	1	1	6.1	6.1	6.1	24.325	2.2366	332660	202890	129780	0	NaN	0	NaN	0	NaN	0	NaN	E7ESL0;A0A0C4DGX2;J3KQY1;Q9NWU5-2;Q9NWU5-3;Q9NWU5	E7ESL0;A0A0C4DGX2;J3KQY1;Q9NWU5-2;Q9NWU5-3;Q9NWU5	39S ribosomal protein L22, mitochondrial	MRPL22
NaN	NaN	NaN	-0.586298	-0.635943	NaN	-0.507111	-0.623332	NaN	-0.942335	-0.97781	-0.900718				+	biological regulation;biosynthetic process;cellular biosynthetic process;cellular macromolecule biosynthetic process;cellular macromolecule metabolic process;cellular metabolic process;cellular nitrogen compound metabolic process;cellular process;cellular response to stimulus;cellular response to stress;developmental process;DNA metabolic process;DNA repair;gene expression;macromolecule biosynthe…	binding;catalytic activity;cation binding;DNA binding;DNA-directed RNA polymerase activity;enzyme binding;ion binding;metal ion binding;nucleic acid binding;nucleotidyltransferase activity;protein binding;RNA polymerase activity;RNA-directed RNA polymerase activity;transferase activity;transferase activity, transferring phosphorus-containing groups;ubiquitin protein ligase binding	cell part;DNA-directed RNA polymerase complex;DNA-directed RNA polymerase II, core complex;intracellular membrane-bounded organelle;intracellular organelle;intracellular organelle part;intracellular part;macromolecular complex;membrane-bounded organelle;nuclear DNA-directed RNA polymerase complex;nuclear part;nucleoplasm;nucleoplasm part;nucleus;organelle;organelle part;protein complex;RNA polyme…	RNA_pol_Rpb1_1;RNA_pol_Rpb1_2;RNA_pol_Rpb1_3;RNA_pol_Rpb1_4;RNA_pol_Rpb1_5;RNA_pol_Rpb1_6;RNA_pol_Rpb1_7;RNA_pol_Rpb1_R	Huntington's disease;Purine metabolism;Pyrimidine metabolism;RNA polymerase	11	11	11	7.4	7.4	7.4	217.2	22.445	26210000	15601000	10609000	0	NaN	1.65339	-0.71112	1.25593	-0.665221	3.33886	-1.04029	A0A0C4DGZ0;P24928;A0A087WWE2;P24928-2	A0A0C4DGZ0;P24928;A0A087WWE2	DNA-directed RNA polymerase;DNA-directed RNA polymerase II subunit RPB1	POLR2A
NaN	NaN	0.441802	NaN	NaN	NaN	NaN	NaN	NaN	NaN	NaN	NaN					acidic amino acid transport;amine transport;amino acid transport;anion transport;carboxylic acid transport;cellular process;establishment of localization;ion transport;L-glutamate transport;nitrogen compound transport;organic acid transport;organic anion transport;organic substance transport;transmembrane transport;transport	acidic amino acid transmembrane transporter activity;active transmembrane transporter activity;amine transmembrane transporter activity;amino acid transmembrane transporter activity;carboxylic acid transmembrane transporter activity;L-amino acid transmembrane transporter activity;L-glutamate transmembrane transporter activity;organic acid transmembrane transporter activity;secondary active transm…	cell part;cytoplasmic part;integral to membrane;intracellular membrane-bounded organelle;intracellular organelle;intracellular organelle part;intracellular part;intrinsic to membrane;membrane;membrane part;membrane-bounded organelle;mitochondrial inner membrane;mitochondrial membrane;mitochondrial part;mitochondrion;nuclear part;nucleoplasm;organelle;organelle inner membrane;organelle membrane;or…	Mito_carr		3	3	3	12.2	12.2	12.2	20.846	2.5403	2953500	1119800	1833800	0	0.341802	0	NaN	0	NaN	0	NaN	E9PS95;A0A0D9SEI9;A0A0D9SFE1;E9PJH7;Q9H1K4;Q9H936;K4DIB6;K4DIB3;K4DIB8;K4DIA8;A0A0D9SFA8;K4DIB0;K4DIA2;A0A0D9SG84;E9PI74;E9PQ36	E9PS95;A0A0D9SEI9;A0A0D9SFE1;E9PJH7;Q9H1K4;Q9H936;K4DIB6;K4DIB3;K4DIB8;K4DIA8	Mitochondrial glutamate carrier 2;Mitochondrial glutamate carrier 1	SLC25A22;SLC25A18
NaN	-0.553193	NaN	NaN	NaN	NaN	NaN	NaN	NaN	NaN	NaN	0.134221										1	1	1	10.4	10.4	10.4	10.925	2.3643	119790000	67960000	51833000	0	-0.653193	0	NaN	0	NaN	0	0.0342209	A0A0D9SEM9	A0A0D9SEM9		DDX39A
-0.196062	-0.206778	-0.236401	-0.0258525	-0.158365	-0.261604	0.181421	0.254231	0.289126	-0.0544223	0.00906043	-0.0298385					biological regulation;biosynthetic process;cellular biosynthetic process;cellular component assembly;cellular component assembly at cellular level;cellular component organization;cellular component organization at cellular level;cellular component organization or biogenesis;cellular component organization or biogenesis at cellular level;cellular macromolecular complex assembly;cellular macromolec…	adenyl nucleotide binding;adenyl ribonucleotide binding;ATP binding;ATPase activity;ATPase activity, coupled;ATP-dependent DNA helicase activity;ATP-dependent helicase activity;ATP-dependent RNA helicase activity;binding;catalytic activity;CTPase activity;DNA binding;DNA helicase activity;DNA-dependent ATPase activity;eukaryotic initiation factor 4E binding;GTPase activity;helicase activity;hydro…	cell part;cytoplasm;cytoplasmic part;extracellular membrane-bounded organelle;extracellular organelle;extracellular region part;extracellular vesicular exosome;intracellular membrane-bounded organelle;intracellular non-membrane-bounded organelle;intracellular organelle;intracellular organelle part;intracellular part;macromolecular complex;membrane;membrane-bounded organelle;membrane-bounded vesic…	DEAD;Helicase_C	RIG-I-like receptor signaling pathway	30	29	29	46.7	45	45	70.839	323.31	2042400000	1052000000	990460000	2.82931	-0.313081	1.16905	-0.248607	1.3305	0.141593	1.6748	-0.125067	A0A0D9SFB3;A0A0D9SG12;A0A0D9SF53;O00571-2;O00571;O15523-2;O15523;O15523-3;A0A0J9YVQ7;C9J081;C9J8G5;A0A087WVZ1;A0A0J9YYH6;B4DLA0;A0A087WX09;D6RCM4;Q9NQI0-3;Q9NQI0-2;Q9NQI0-4;Q9NQI0;H0Y960	A0A0D9SFB3;A0A0D9SG12;A0A0D9SF53;O00571-2;O00571;O15523-2;O15523	ATP-dependent RNA helicase DDX3X;ATP-dependent RNA helicase DDX3Y	DDX3X;DDX3Y
NaN	NaN	NaN	NaN	NaN	NaN	NaN	NaN	NaN	NaN	NaN	0.498251					biological adhesion;biological regulation;cell adhesion;cell communication;cell junction assembly;cell junction organization;cell-cell adhesion;cell-cell junction assembly;cell-cell junction organization;cell-cell signaling;cellular component assembly;cellular component assembly at cellular level;cellular component organization;cellular component organization at cellular level;cellular component …		anchoring junction;cell junction;cell part;cell-cell junction;cytoplasm;cytoplasmic part;cytoskeletal part;cytoskeleton;desmosome;internal side of plasma membrane;intracellular non-membrane-bounded organelle;intracellular organelle;intracellular organelle part;intracellular part;membrane;membrane part;midbody;mitotic spindle;non-membrane-bounded organelle;organelle;organelle part;perinuclear regi…	Arm		4	4	4	3.9	3.9	3.9	133.97	6.812	3644300	1483500	2160800	0	NaN	0	NaN	0	NaN	0	0.398251	A0A0D9SF60;Q99569-2;Q99569	A0A0D9SF60;Q99569-2;Q99569	Plakophilin-4	PKP4
NaN	NaN	NaN	NaN	NaN	0.693498	0.67084	0.700529	0.688941	1.23045	1.14613	1.19415			+	+	actin cytoskeleton organization;actin filament-based process;actomyosin structure organization;asymmetric Golgi ribbon formation;biological regulation;cell migration;cell motility;cellular component movement;cellular component organization;cellular component organization at cellular level;cellular component organization or biogenesis;cellular component organization or biogenesis at cellular level…	actin binding;actin filament binding;adenyl nucleotide binding;adenyl ribonucleotide binding;ADP binding;ATP binding;binding;catalytic activity;cytoskeletal protein binding;DNA binding;hydrolase activity;hydrolase activity, acting on acid anhydrides;hydrolase activity, acting on acid anhydrides, in phosphorus-containing anhydrides;motor activity;nucleic acid binding;nucleoside-triphosphatase acti…	actomyosin;cell part;cytoplasmic part;cytoskeletal part;endoplasmic reticulum-Golgi intermediate compartment;Golgi apparatus part;Golgi membrane;intracellular membrane-bounded organelle;intracellular organelle;intracellular organelle part;intracellular part;macromolecular complex;membrane;membrane-bounded organelle;myosin complex;organelle;organelle membrane;organelle part;protein complex;trans-G…	Myosin_head;Myosin_tail_1;PDZ		36	36	36	21.8	21.8	21.8	231.1	215.51	218540000	62936000	155600000	0	NaN	0	0.593498	3.66418	0.58677	3.29996	1.09024	A0A0D9SFK2;Q92614-4;Q92614;Q92614-3;Q92614-2;Q92614-5;H0YEV9	A0A0D9SFK2;Q92614-4;Q92614;Q92614-3;Q92614-2;Q92614-5	Unconventional myosin-XVIIIa	MYO18A
NaN	NaN	0.507516	NaN	NaN	NaN	NaN	NaN	NaN	NaN	NaN	NaN					2-oxoglutarate metabolic process;acetyl-CoA catabolic process;acetyl-CoA metabolic process;alcohol catabolic process;alcohol metabolic process;amine catabolic process;amine metabolic process;anatomical structure development;aspartate family amino acid catabolic process;aspartate family amino acid metabolic process;carbohydrate catabolic process;carbohydrate metabolic process;carboxylic acid catab…	binding;catalytic activity;cation binding;coenzyme binding;cofactor binding;ion binding;metal ion binding;oxidoreductase activity;oxidoreductase activity, acting on the aldehyde or oxo group of donors;oxidoreductase activity, acting on the aldehyde or oxo group of donors, disulfide as acceptor;oxidoreductase activity, acting on the aldehyde or oxo group of donors, NAD or NADP as acceptor;oxogluta…	cell part;cytoplasmic part;intracellular membrane-bounded organelle;intracellular organelle;intracellular organelle lumen;intracellular organelle part;intracellular part;macromolecular complex;membrane;membrane-bounded organelle;membrane-enclosed lumen;mitochondrial matrix;mitochondrial membrane;mitochondrial part;mitochondrion;organelle;organelle lumen;organelle membrane;organelle part;oxoglutar…	E1_dh;Transket_pyr	Citrate cycle (TCA cycle);Lysine degradation;Tryptophan metabolism	2	2	2	2.3	2.3	2.3	99.015	2.1667	1649200	688700	960540	0	0.407516	0	NaN	0	NaN	0	NaN	E9PFG7;A0A0D9SFS3;E9PDF2;E9PCR7;Q9ULD0-3;Q9ULD0-2;Q9ULD0;Q02218-2;Q02218;Q02218-3	E9PFG7;A0A0D9SFS3;E9PDF2;E9PCR7;Q9ULD0-3;Q9ULD0-2;Q9ULD0;Q02218-2;Q02218;Q02218-3	2-oxoglutarate dehydrogenase-like, mitochondrial;2-oxoglutarate dehydrogenase, mitochondrial	OGDH;OGDHL
NaN	NaN	NaN	NaN	NaN	NaN	-0.110308	-0.304665	-0.340697	0.239642	0.322851	0.268794							cell part;cytoplasm;cytoskeleton;intracellular non-membrane-bounded organelle;intracellular organelle;intracellular part;non-membrane-bounded organelle;organelle	Phostensin;Phostensin_N		9	9	9	20.2	20.2	20.2	68.041	23.622	74417000	41229000	33188000	0	NaN	0	NaN	1.40955	-0.35189	1.73461	0.177096	A0A0G2JHC2;Q6NYC8;Q6NYC8-3;Q6NYC8-2;Q6NYC8-4;A0A0G2JKF1	A0A0G2JHC2;Q6NYC8;Q6NYC8-3	Phostensin	PPP1R18
NaN	NaN	NaN	NaN	NaN	NaN	NaN	NaN	NaN	NaN	NaN	NaN					biosynthetic process;cellular biosynthetic process;cellular component disassembly;cellular component disassembly at cellular level;cellular component organization;cellular component organization at cellular level;cellular component organization or biogenesis;cellular component organization or biogenesis at cellular level;cellular macromolecular complex disassembly;cellular macromolecular complex …	structural constituent of ribosome;structural molecule activity	cell junction;cell part;cytoplasmic part;intracellular membrane-bounded organelle;intracellular organelle;intracellular organelle part;intracellular part;macromolecular complex;membrane;membrane-bounded organelle;mitochondrial inner membrane;mitochondrial membrane;mitochondrial part;mitochondrial small ribosomal subunit;mitochondrion;nuclear part;nucleoplasm;organellar small ribosomal subunit;org…	Ribosomal_S18		1	1	1	4.7	4.7	4.7	24.354	2.5009	6360600	2233200	4127400	0	NaN	0	NaN	0	NaN	0	NaN	A0A0G2JIC6;Q9Y676	A0A0G2JIC6;Q9Y676	28S ribosomal protein S18b, mitochondrial	MRPS18B
0.945832	0.0720372	0.950543	1.084	1.27513	1.0285	1.84956	1.9443	1.95222	0.947704	1.11537	1.08678			+	+				HSP70		24	20	8	41.7	37.2	16	70.108	106.77	561110000	167550000	393560000	0.705129	0.556138	2.2818	1.02921	3.48165	1.81536	2.52892	0.949951	A0A0G2JIW1;P0DMV9;P0DMV8;P0DMV8-2;V9GZ37	A0A0G2JIW1;P0DMV9;P0DMV8;P0DMV8-2;V9GZ37	Heat shock 70 kDa protein 1B;Heat shock 70 kDa protein 1A	HSPA1B;HSPA1A
NaN	NaN	NaN	NaN	NaN	NaN	NaN	NaN	NaN	NaN	NaN	NaN					anatomical structure morphogenesis;axonogenesis;biological regulation;cell part morphogenesis;cell projection morphogenesis;cell projection organization;cellular component assembly;cellular component assembly at cellular level;cellular component disassembly;cellular component disassembly at cellular level;cellular component morphogenesis;cellular component organization;cellular component organiza…	binding;enzyme binding;protease binding;protein binding	adherens junction;anchoring junction;caveola;cell junction;cell part;cell-substrate adherens junction;cell-substrate junction;centriolar satellite;cytoplasmic membrane-bounded vesicle;cytoplasmic part;cytoplasmic vesicle;cytoskeletal part;endosome;extracellular membrane-bounded organelle;extracellular organelle;extracellular region part;extracellular vesicular exosome;flotillin complex;focal adhe…	Band_7	Insulin signaling pathway	2	2	2	11.4	11.4	11.4	20.482	2.9999	1683400	753450	929910	0	NaN	0	NaN	0	NaN	0	NaN	A2AB13;A2AB11;A0A0G2JJQ6;A2AB12;A2AB10;O75955-2;O75955	A2AB13;A2AB11;A0A0G2JJQ6;A2AB12;A2AB10;O75955-2;O75955	Flotillin-1	FLOT1
-0.255219	-0.192332	-0.0401557	-0.66857	-0.281001	-0.803645	-0.462595	-0.338396	-0.170134	-0.556096	-0.75375	NaN					biological regulation;cellular component assembly;cellular component assembly at cellular level;cellular component organization;cellular component organization at cellular level;cellular component organization or biogenesis;cellular component organization or biogenesis at cellular level;cellular macromolecular complex assembly;cellular macromolecular complex subunit organization;cellular macromol…	adenyl nucleotide binding;adenyl ribonucleotide binding;ATP binding;ATPase activity;ATPase activity, coupled;ATP-dependent helicase activity;ATP-dependent protein binding;ATP-dependent RNA helicase activity;binding;catalytic activity;helicase activity;hydrolase activity;hydrolase activity, acting on acid anhydrides;hydrolase activity, acting on acid anhydrides, in phosphorus-containing anhydrides…	cell part;cytoplasm;intracellular membrane-bounded organelle;intracellular non-membrane-bounded organelle;intracellular organelle;intracellular organelle part;intracellular part;macromolecular complex;membrane;membrane-bounded organelle;non-membrane-bounded organelle;nuclear body;nuclear part;nuclear speck;nucleolus;nucleoplasm;nucleoplasm part;nucleus;organelle;organelle part;protein complex;rib…	DEAD;Helicase_C	mRNA surveillance pathway;RNA transport;Spliceosome	8	8	8	25.3	25.3	25.3	38.125	15.284	59550000	34029000	25520000	1.26484	-0.262569	1.31344	-0.684405	1.42306	-0.423708	1.08161	-0.754923	A0A0G2JJZ9;Q13838;Q13838-2;Q5STU3;O00148;F6UJC5;F6WLT2;H0Y400;F6S4E6;A0A0A0MT12;F6TRA5;O00148-2;H0YCC6;K7EQN7;O00148-3;K7EPJ3	A0A0G2JJZ9;Q13838;Q13838-2;Q5STU3;O00148;F6UJC5;F6WLT2;H0Y400	Spliceosome RNA helicase DDX39B;ATP-dependent RNA helicase DDX39A	DDX39B;DDX39A
NaN	0.164529	NaN	NaN	NaN	NaN	NaN	NaN	-0.259081	NaN	NaN	NaN					adiponectin-mediated signaling pathway;anatomical structure morphogenesis;axon guidance;biological regulation;cell cycle;cell surface receptor linked signaling pathway;cellular component assembly;cellular component assembly at cellular level;cellular component organization;cellular component organization at cellular level;cellular component organization or biogenesis;cellular component organizati…	binding;catalytic activity;cation binding;chromatin binding;enzyme regulator activity;identical protein binding;ion binding;kinase activity;kinase regulator activity;metal ion binding;protein binding;protein domain specific binding;protein kinase regulator activity;receptor binding;transcription factor binding;transferase activity;transferase activity, transferring phosphorus-containing groups	cell part;cytoplasm;cytoplasmic part;cytosol;extracellular membrane-bounded organelle;extracellular organelle;extracellular region part;extracellular vesicular exosome;intracellular membrane-bounded organelle;intracellular organelle;intracellular part;macromolecular complex;membrane-bounded organelle;membrane-bounded vesicle;nucleus;organelle;protein complex;protein kinase CK2 complex;vesicle	CK_II_beta	Adherens junction;Circadian rhythm - plant;Measles;Ribosome biogenesis in eukaryotes;Tight junction;Wnt signaling pathway	2	2	2	8.3	8.3	8.3	26.673	4.1678	16909000	9160600	7748200	0	0.0645289	0	NaN	0	-0.359081	0	NaN	Q5SRQ3;Q5SRQ6;N0E472;A0A0G2JM12;P67870	Q5SRQ3;Q5SRQ6;N0E472;A0A0G2JM12;P67870	Casein kinase II subunit beta	CSNK2B-LY6G5B-1181;CSNK2B;CSNK2B-LY6G5B--991
0.236462	NaN	NaN	NaN	NaN	NaN	NaN	NaN	NaN	NaN	NaN	NaN					amine catabolic process;amine metabolic process;biotin metabolic process;branched chain family amino acid catabolic process;branched chain family amino acid metabolic process;carboxylic acid catabolic process;carboxylic acid metabolic process;catabolic process;cellular amide metabolic process;cellular amine metabolic process;cellular amino acid catabolic process;cellular amino acid metabolic proc…	adenyl nucleotide binding;adenyl ribonucleotide binding;ATP binding;binding;catalytic activity;CoA carboxylase activity;ligase activity;ligase activity, forming carbon-carbon bonds;methylcrotonoyl-CoA carboxylase activity;nucleotide binding;purine nucleotide binding;purine ribonucleoside triphosphate binding;purine ribonucleotide binding;ribonucleotide binding	cell part;cytoplasmic part;cytosol;intracellular membrane-bounded organelle;intracellular organelle;intracellular organelle lumen;intracellular organelle part;intracellular part;membrane-bounded organelle;membrane-enclosed lumen;mitochondrial matrix;mitochondrial part;mitochondrion;organelle;organelle lumen;organelle part	Carboxyl_trans	Valine, leucine and isoleucine degradation	2	2	2	9.6	9.6	9.6	22.855	4.9661	3985900	1898300	2087500	0	0.136462	0	NaN	0	NaN	0	NaN	A0A0G2JM88;D6R9R1;D6RDF7;Q9HCC0-2;Q9HCC0	A0A0G2JM88;D6R9R1;D6RDF7;Q9HCC0-2;Q9HCC0	Methylcrotonoyl-CoA carboxylase beta chain, mitochondrial	MCCC2
NaN	NaN	NaN	NaN	NaN	NaN	NaN	NaN	NaN	NaN	NaN	NaN					anatomical structure homeostasis;antibacterial humoral response;antimicrobial humoral response;biological regulation;cellular component organization;cellular component organization or biogenesis;cellular membrane organization;cellular process;defense response;defense response to bacterium;endocytosis;establishment of localization;glomerular filtration;homeostatic process;humoral immune response;i…	antigen binding;binding	blood microparticle;dimeric IgA immunoglobulin complex;extracellular membrane-bounded organelle;extracellular organelle;extracellular region;extracellular region part;extracellular space;extracellular vesicular exosome;IgA immunoglobulin complex;IgA immunoglobulin complex, circulating;immunoglobulin complex;immunoglobulin complex, circulating;macromolecular complex;membrane-bounded organelle;memb…	C1-set		4	1	1	15	4.4	4.4	36.508	2.4892	2750900	2725100	25787	0	NaN	0	NaN	0	NaN	0	NaN	A0A0G2JMB2;P01877;A0A075B6N7	A0A0G2JMB2;P01877;A0A075B6N7	Ig alpha-2 chain C region	IGHA2
NaN	NaN	-5.33899	NaN	NaN	NaN	NaN	NaN	NaN	NaN	-4.7441	-5.83642					activation of immune response;biological regulation;complement activation;complement activation, classical pathway;defense response;humoral immune response;immune effector process;immune response;immune system process;innate immune response;macromolecule metabolic process;metabolic process;positive regulation of biological process;positive regulation of immune response;positive regulation of immu…	antigen binding;binding	blood microparticle;extracellular membrane-bounded organelle;extracellular organelle;extracellular region;extracellular region part;extracellular space;extracellular vesicular exosome;membrane-bounded organelle;membrane-bounded vesicle;organelle;vesicle	C1-set		4	3	2	12.9	10.7	7.1	35.9	5.4155	561140000	546960000	14176000	0	-5.43899	0	NaN	0	NaN	1.19189	-5.39026	A0A0G2JN06;P01859;A0A0G2JPD4;P01861	A0A0G2JN06;P01859;A0A0G2JPD4;P01861	Ig gamma-2 chain C region;Ig gamma-4 chain C region	IGHG2;IGHG4
NaN	1.2455	NaN	3.87499	2.24589	3.72094	NaN	2.56208	2.95673	2.45678	1.95739	2.24114				+	antibacterial humoral response;antigen processing and presentation;antigen processing and presentation of endogenous antigen;antigen processing and presentation of endogenous peptide antigen;antigen processing and presentation of endogenous peptide antigen via MHC class I;antigen processing and presentation of endogenous peptide antigen via MHC class I via ER pathway;antigen processing and presen…	antigen binding;beta-2-microglobulin binding;binding;peptide antigen binding;peptide binding;protein binding;protein complex binding;receptor binding;T cell receptor binding;TAP binding	cell part;cell surface;coated vesicle membrane;cytoplasmic part;cytoplasmic vesicle membrane;cytoplasmic vesicle part;early endosome membrane;endocytic vesicle membrane;endoplasmic reticulum;endoplasmic reticulum exit site;endoplasmic reticulum part;endosomal part;endosome membrane;ER to Golgi transport vesicle membrane;extracellular membrane-bounded organelle;extracellular organelle;extracellula…	C1-set;MHC_I;MHC_I_C	Allograft rejection;Antigen processing and presentation;Autoimmune thyroid disease;Cell adhesion molecules (CAMs);Endocytosis;Graft-versus-host disease;Natural killer cell mediated cytotoxicity;Phagosome;Type I diabetes mellitus;Viral myocarditis	12	12	1	41.6	41.6	3.8	38.59	176.28	159260000	10096000	149160000	0	1.1455	1.59119	3.18061	1.32653	2.6594	2.33468	2.11844	A0A0G2JNY4;P10316;P01892;P01891;P30459;P16189;Q9GJ45;B0UXQ0;P16190;P30512;P10314;Q09160;A0A0G2JNV5;P30511-2;P30511;P30511-3	A0A0G2JNY4;P10316;P01892;P01891;P30459;P16189;Q9GJ45;B0UXQ0;P16190;P30512;P10314	HLA class I histocompatibility antigen, A-69 alpha chain;HLA class I histocompatibility antigen, A-2 alpha chain;HLA class I histocompatibility antigen, A-68 alpha chain;HLA class I histocompatibility antigen, A-74 alpha chain;HLA class I histocompatibility antigen, A-31 alpha chain;HLA class I histocompatibility antigen, A-33 alpha chain;HLA class I histocompatibility antigen, A-29 alpha chain;H…	HLA-A
NaN	NaN	NaN	NaN	NaN	NaN	0.146916	-0.0523413	0.0409626	-0.0870129	0.264837	0.158466					anatomical structure development;anatomical structure formation involved in morphogenesis;anatomical structure morphogenesis;apoptosis;apoptosis involved in morphogenesis;astrocyte cell migration;asymmetric protein localization;auditory receptor cell stereocilium organization;biological adhesion;biological regulation;cell adhesion;cell death;cell migration;cell motility;cell projection organizati…		adherens junction;anchoring junction;basolateral plasma membrane;cell junction;cell part;cell projection;cell-cell adherens junction;cell-cell junction;cytoplasmic part;extracellular membrane-bounded organelle;extracellular organelle;extracellular region part;extracellular vesicular exosome;intracellular organelle part;intracellular part;lamellipodium;macromolecular complex;membrane;membrane part…	LRR_4;LRR_8;PDZ		18	18	18	12.3	12.3	12.3	174.91	28.337	61551000	30391000	31160000	0	NaN	0	NaN	0.355167	-0.054821	0.0370755	0.0120967	A0A0G2JNZ2;A0A0G2JPP5;Q14160;Q14160-3;A0A0G2JMS7;Q14160-2;H0YCG0;H0YDF9;Q5T0G3;Q9BTT6-2;Q9BTT6	A0A0G2JNZ2;A0A0G2JPP5;Q14160;Q14160-3;A0A0G2JMS7;Q14160-2	Protein scribble homolog	SCRIB
NaN	NaN	NaN	NaN	NaN	NaN	NaN	NaN	NaN	NaN	NaN	NaN						binding;nucleic acid binding;nucleotide binding;RNA binding	cell part;intracellular membrane-bounded organelle;intracellular organelle;intracellular part;macromolecular complex;membrane-bounded organelle;nucleus;organelle;ribonucleoprotein complex	RRM_1		10	1	1	25.9	5.5	5.5	32.057	7.6476	3547600	2478400	1069200	0	NaN	0	NaN	0	NaN	0	NaN	A0A0G2JPF8;P0DMR1;O60812;B7ZW38;A0A0G2JNQ3;B2RXH8	A0A0G2JPF8;P0DMR1;O60812;B7ZW38;A0A0G2JNQ3;B2RXH8	Heterogeneous nuclear ribonucleoprotein C-like 4;Heterogeneous nuclear ribonucleoprotein C-like 1;Heterogeneous nuclear ribonucleoprotein C-like 3;Heterogeneous nuclear ribonucleoprotein C-like 2	HNRNPCL4;HNRNPCL1;HNRNPCL3;HNRNPCL2
NaN	NaN	NaN	NaN	NaN	NaN	NaN	NaN	NaN	NaN	NaN	NaN					acylglycerol biosynthetic process;acylglycerol metabolic process;biosynthetic process;cardiolipin biosynthetic process;cardiolipin metabolic process;CDP-diacylglycerol biosynthetic process;CDP-diacylglycerol metabolic process;cellular biosynthetic process;cellular lipid metabolic process;cellular metabolic process;cellular process;diacylglycerol biosynthetic process;diacylglycerol metabolic proce…	catalytic activity;cytidylyltransferase activity;nucleotidyltransferase activity;phosphatidate cytidylyltransferase activity;transferase activity;transferase activity, transferring phosphorus-containing groups	cell part;cytoplasmic part;extrinsic to membrane;extrinsic to mitochondrial inner membrane;extrinsic to organelle membrane;intracellular organelle part;intracellular part;membrane part;mitochondrial membrane part;mitochondrial part;organelle part	Mmp37		2	2	2	12.3	12.3	12.3	26.722	5.3038	1922600	0	1922600	0	NaN	0	NaN	0	NaN	0	NaN	A0A0G2JQ92;Q96BW9-2;Q96BW9-3;Q96BW9;H7C1A2;G3V0F3;B4E101	A0A0G2JQ92;Q96BW9-2;Q96BW9-3;Q96BW9;H7C1A2;G3V0F3;B4E101	Phosphatidate cytidylyltransferase, mitochondrial	TAMM41
NaN	NaN	NaN	NaN	NaN	NaN	NaN	NaN	-0.446345	NaN	NaN	-0.267149					anatomical structure morphogenesis;biological regulation;cell migration;cell migration in hindbrain;cell motility;cell part morphogenesis;cell projection morphogenesis;cell projection organization;cellular component morphogenesis;cellular component movement;cellular component organization;cellular component organization at cellular level;cellular component organization or biogenesis;cellular comp…	binding;mRNA binding;nucleic acid binding;nucleotide binding;protein binding;protein binding transcription factor activity;protein C-terminus binding;RNA binding;transcription cofactor activity;transcription corepressor activity;transcription factor binding;transcription factor binding transcription factor activity	cell part;cytoplasm;cytoplasmic part;Golgi apparatus part;intracellular membrane-bounded organelle;intracellular organelle;intracellular organelle part;intracellular part;membrane-bounded organelle;nuclear part;nucleoplasm;nucleus;organelle;organelle part;trans-Golgi network	Fox-1_C;RRM_1		2	2	2	18.1	18.1	18.1	23.543	18.397	10791000	5152200	5639000	0	NaN	0	NaN	0	-0.546345	0	-0.367149	A0A0G2JRD1;S4R3K7;B0QYV1;A0A0G2JRA5;O43251-5;O43251-10;O43251-2;O43251;O43251-6;O43251-8;A0A0G2JSB3;I3L1D4;B0QYY7;S4R469;F8VR27;F8VZY7;B0QYY4;A0A087X2B1;J3KNW3;B7Z1U7;F8VZG9;O43251-3;O43251-9;Q9NWB1-3;O43251-4;Q9NWB1-4;Q9NWB1-5;Q9NWB1;O43251-7;Q9NWB1-2	A0A0G2JRD1;S4R3K7;B0QYV1;A0A0G2JRA5;O43251-5;O43251-10;O43251-2;O43251;O43251-6;O43251-8;A0A0G2JSB3;I3L1D4;B0QYY7;S4R469;F8VR27;F8VZY7;B0QYY4;A0A087X2B1;J3KNW3;B7Z1U7;F8VZG9;O43251-3;O43251-9;Q9NWB1-3;O43251-4;Q9NWB1-4;Q9NWB1-5;Q9NWB1;O43251-7;Q9NWB1-2	RNA binding protein fox-1 homolog;RNA binding protein fox-1 homolog 2;RNA binding protein fox-1 homolog 1	RBFOX2;RBFOX1
NaN	NaN	NaN	NaN	NaN	NaN	NaN	NaN	NaN	NaN	NaN	NaN					biological regulation;biosynthetic process;cellular biosynthetic process;cellular macromolecule biosynthetic process;cellular macromolecule metabolic process;cellular metabolic process;cellular nitrogen compound metabolic process;cellular process;gene expression;macromolecule biosynthetic process;macromolecule metabolic process;metabolic process;nitrogen compound metabolic process;nucleic acid me…	binding;DNA binding;nucleic acid binding;nucleic acid binding transcription factor activity;protein binding transcription factor activity;sequence-specific DNA binding transcription factor activity;transcription coactivator activity;transcription cofactor activity;transcription factor binding transcription factor activity	cell part;cytoplasm;histone acetyltransferase complex;histone methyltransferase complex;intracellular organelle part;intracellular part;macromolecular complex;methyltransferase complex;MLL1 complex;nuclear part;nucleoplasm;nucleoplasm part;organelle part;protein complex;SAGA-type complex;transcription factor complex;transcription factor TFIID complex;transcription factor TFTC complex	TAF4;TAFH	Basal transcription factors;Huntington's disease	1	1	1	6.5	6.5	6.5	22.738	4.778	605510	377660	227850	0	NaN	0	NaN	0	NaN	0	NaN	V9GY14;A0A0G2JRY5;O00268	V9GY14;A0A0G2JRY5;O00268	Transcription initiation factor TFIID subunit 4	TAF4
NaN	NaN	NaN	NaN	NaN	NaN	NaN	NaN	NaN	NaN	NaN	NaN					anatomical structure development;ATP-dependent chromatin remodeling;biological regulation;biosynthetic process;blastocyst hatching;cell differentiation;cellular biosynthetic process;cellular component disassembly;cellular component disassembly at cellular level;cellular component organization;cellular component organization at cellular level;cellular component organization or biogenesis;cellular …	binding;p53 binding;protein binding;protein binding transcription factor activity;Tat protein binding;transcription coactivator activity;transcription cofactor activity;transcription factor binding;transcription factor binding transcription factor activity	cell part;chromatin;chromatin remodeling complex;chromosomal part;chromosome;intracellular membrane-bounded organelle;intracellular non-membrane-bounded organelle;intracellular organelle;intracellular organelle part;intracellular part;macromolecular complex;membrane-bounded organelle;nBAF complex;non-membrane-bounded organelle;npBAF complex;nuclear chromatin;nuclear chromosome;nuclear chromosome …	SNF5		1	1	1	16	16	16	9.094	3.0224	9065000	6046900	3018100	0	NaN	0	NaN	0	NaN	0	NaN	A0A0U1RQQ2;A0A0U1RRB8;C9JTA6;A0A0G2JSE9;G5E975;Q12824-2;Q12824	A0A0U1RQQ2;A0A0U1RRB8;C9JTA6;A0A0G2JSE9;G5E975;Q12824-2;Q12824	SWI/SNF-related matrix-associated actin-dependent regulator of chromatin subfamily B member 1	SMARCB1
NaN	NaN	NaN	NaN	NaN	NaN	NaN	NaN	NaN	NaN	NaN	NaN					alcohol metabolic process;amine biosynthetic process;amine catabolic process;amine metabolic process;aspartate family amino acid catabolic process;aspartate family amino acid metabolic process;betaine biosynthetic process;betaine metabolic process;biosynthetic process;carboxylic acid biosynthetic process;carboxylic acid catabolic process;carboxylic acid metabolic process;catabolic process;cellula…	aldehyde dehydrogenase (NAD) activity;betaine-aldehyde dehydrogenase activity;catalytic activity;L-aminoadipate-semialdehyde dehydrogenase activity;oxidoreductase activity;oxidoreductase activity, acting on the aldehyde or oxo group of donors;oxidoreductase activity, acting on the aldehyde or oxo group of donors, NAD or NADP as acceptor	cell part;cytoplasm;cytoplasmic part;cytosol;extracellular membrane-bounded organelle;extracellular organelle;extracellular region part;extracellular vesicular exosome;intracellular membrane-bounded organelle;intracellular organelle;intracellular organelle lumen;intracellular organelle part;intracellular part;membrane-bounded organelle;membrane-bounded vesicle;membrane-enclosed lumen;mitochondria…	Aldedh	Arginine and proline metabolism;Ascorbate and aldarate metabolism;beta-Alanine metabolism;Fatty acid metabolism;Glycerolipid metabolism;Glycine, serine and threonine metabolism;Glycolysis / Gluconeogenesis;Histidine metabolism;Lysine biosynthesis;Lysine degradation;Propanoate metabolism;Pyruvate metabolism;Tryptophan metabolism;Valine, leucine and isoleucine degradation	2	2	2	8.5	8.5	8.5	32.085	2.8796	3589000	1369800	2219200	0	NaN	0	NaN	0	NaN	0	NaN	A0A0J9YWF7;F8VS02;P49419-4;P49419-2;P49419;F8VVF2;H0YHM6	A0A0J9YWF7;F8VS02;P49419-4;P49419-2;P49419;F8VVF2;H0YHM6	Alpha-aminoadipic semialdehyde dehydrogenase	ALDH7A1
NaN	NaN	NaN	NaN	NaN	NaN	NaN	NaN	NaN	NaN	NaN	NaN					actin cytoskeleton organization;actin filament-based process;anatomical structure development;biological adhesion;biological regulation;cell adhesion;cell differentiation;cell differentiation involved in embryonic placenta development;cell-cell adhesion;cellular component organization;cellular component organization at cellular level;cellular component organization or biogenesis;cellular componen…	ATPase activator activity;ATPase regulator activity;binding;chaperone binding;DNA binding;enzyme activator activity;enzyme regulator activity;heat shock protein binding;nucleic acid binding;nucleoside-triphosphatase regulator activity;protein binding;protein binding involved in protein folding;unfolded protein binding	cell part;contractile fiber part;cytoplasm;cytoplasmic part;cytosol;extracellular membrane-bounded organelle;extracellular organelle;extracellular region part;extracellular vesicular exosome;intracellular membrane-bounded organelle;intracellular organelle;intracellular organelle part;intracellular part;membrane;membrane-bounded organelle;membrane-bounded vesicle;nuclear part;nucleoplasm;nucleus;o…	DnaJ		2	2	1	10.1	10.1	5.7	25.377	4.5425	7087400	3014300	4073000	0	NaN	0	NaN	0	NaN	0	NaN	C9J2C4;A0A0J9YX62;O75190-2;O75190-3;O75190;C9JB42;C9JDR7;C9JDX6;F8WCZ4;C9J2P2;E9PH18;Q8WWF6;Q8NHS0;O75190-4	C9J2C4;A0A0J9YX62;O75190-2;O75190-3;O75190;C9JB42;C9JDR7;C9JDX6;F8WCZ4;C9J2P2;E9PH18;Q8WWF6;Q8NHS0;O75190-4	DnaJ homolog subfamily B member 6;DnaJ homolog subfamily B member 3;DnaJ homolog subfamily B member 8	DNAJB6;DNAJB3;DNAJB8
0.380619	0.0480967	0.312665	0.59684	0.572017	0.473423	-1.11307	-1.16647	-1.13597	-1.47349	-1.27223	-1.37553			+	+	biological regulation;posttranscriptional regulation of gene expression;regulation of biological process;regulation of gene expression;regulation of macromolecule metabolic process;regulation of metabolic process	binding;cation binding;ion binding;metal ion binding;nucleic acid binding;nucleotide binding;structural molecule activity;transition metal ion binding;zinc ion binding	cell part;intracellular organelle part;intracellular part;membrane;nuclear inner membrane;nuclear matrix;nuclear membrane;nuclear part;nucleoplasm;organelle inner membrane;organelle membrane;organelle part			22	22	22	27.9	27.9	27.9	94.622	141.65	843560000	595140000	248420000	0.5467	0.147127	2.1536	0.447427	3.80702	-1.2385	2.80941	-1.47375	A0A0R4J2E8;A8MXP9;P43243;D6REM6;D6R991;H0Y8T4;B3KM87;P43243-2;Q68E03;D6RAM9;D6RAY2;D6R8Z5;D6RBI2;D6RE02;D6RIA2;D6RB45;D6R9F3;D6RBS2;D6RCM3;D6REK4;D6RBK5	A0A0R4J2E8;A8MXP9;P43243;D6REM6;D6R991	Matrin-3	MATR3
NaN	NaN	NaN	NaN	-0.415961	-0.416616	0.196859	0.125519	-0.25472	-0.406694	-0.372954	-0.512658		+			biological regulation;biosynthetic process;cellular biosynthetic process;cellular macromolecule biosynthetic process;cellular macromolecule metabolic process;cellular metabolic process;cellular nitrogen compound metabolic process;cellular process;macromolecule biosynthetic process;macromolecule metabolic process;metabolic process;mRNA metabolic process;mRNA processing;nitrogen compound metabolic …	binding;nucleic acid binding;nucleotide binding;RNA binding	cell part;cytoplasmic part;cytoskeletal part;cytoskeleton;intracellular membrane-bounded organelle;intracellular non-membrane-bounded organelle;intracellular organelle;intracellular organelle part;intracellular part;membrane-bounded organelle;microtubule cytoskeleton;microtubule organizing center;non-membrane-bounded organelle;nuclear body;nuclear part;nuclear speck;nucleoplasm;nucleoplasm part;n…	RBM39linker;RRM_1		4	4	4	21.6	21.6	21.6	26.698	26.257	37323000	18758000	18565000	0	NaN	3.3941	-0.516288	0.196498	-0.0774474	2.20558	-0.530768	A0A0U1RQH7;H0Y4X3;G3XAC6;Q14498-3;Q14498-2;Q14498;Q5QP23;A0A0U1RQW2;Q5QP22	A0A0U1RQH7;H0Y4X3;G3XAC6;Q14498-3;Q14498-2;Q14498;Q5QP23	RNA-binding protein 39	RBM39
NaN	NaN	NaN	NaN	NaN	NaN	NaN	NaN	NaN	NaN	NaN	NaN					cellular macromolecule metabolic process;cellular metabolic process;cellular process;cellular protein metabolic process;macromolecule metabolic process;macromolecule modification;metabolic process;primary metabolic process;protein de-ADP-ribosylation;protein metabolic process;protein modification process	ADP-ribosylarginine hydrolase activity;binding;catalytic activity;cation binding;hydrolase activity;hydrolase activity, acting on glycosyl bonds;hydrolase activity, hydrolyzing N-glycosyl compounds;ion binding;magnesium ion binding;metal ion binding		ADP_ribosyl_GH		2	2	2	1.2	1.2	1.2	211.81	3.3545	16511000	8614900	7896600	0	NaN	0	NaN	0	NaN	0	NaN	A0A0U1RQK4;Q8NDY3	A0A0U1RQK4;Q8NDY3	[Protein ADP-ribosylarginine] hydrolase-like protein 1	ADPRHL1
NaN	NaN	NaN	NaN	NaN	NaN	-0.582944	-0.985588	-0.874137	NaN	NaN	NaN					anatomical structure development;anatomical structure morphogenesis;anterior neuropore closure;ATP-dependent chromatin remodeling;biological regulation;biosynthetic process;blood vessel development;body morphogenesis;cell death;cellular biosynthetic process;cellular component organization;cellular component organization at cellular level;cellular component organization or biogenesis;cellular comp…	binding;binding, bridging;cation binding;DNA binding;ion binding;metal ion binding;nucleic acid binding;nucleic acid binding transcription factor activity;protein binding;protein binding, bridging;sequence-specific DNA binding;sequence-specific DNA binding transcription factor activity;transition metal ion binding;zinc ion binding	cell part;chromatin;chromatin remodeling complex;chromosomal part;histone deacetylase complex;intracellular membrane-bounded organelle;intracellular organelle;intracellular organelle part;intracellular part;macromolecular complex;membrane-bounded organelle;nuclear body;nuclear chromatin;nuclear chromosome part;nuclear part;nuclear speck;nucleoplasm;nucleoplasm part;nucleus;NuRD complex;organelle;…	GATA		2	2	2	9.1	9.1	9.1	28.673	9.4819	12968000	8847500	4120600	0	NaN	0	NaN	1.77457	-0.914223	0	NaN	A0A0U1RR30;A0A0U1RRM1;Q8WXI9;Q86YP4-2;Q86YP4;Q86YP4-3	A0A0U1RR30;A0A0U1RRM1;Q8WXI9;Q86YP4-2;Q86YP4;Q86YP4-3	Transcriptional repressor p66-beta;Transcriptional repressor p66-alpha	GATAD2B;GATAD2A
0.114367	-0.439402	0.455965	1.28599	0.890875	-0.873054	-1.8977	-1.81061	-1.80606	-2.60156	-2.2723	-2.19126			+	+	biological regulation;cell cycle;cell cycle checkpoint;cellular component assembly;cellular component assembly at cellular level;cellular component organization;cellular component organization at cellular level;cellular component organization or biogenesis;cellular component organization or biogenesis at cellular level;cellular macromolecular complex assembly;cellular macromolecular complex subun…	binding;damaged DNA binding;DNA binding;enzyme binding;histone binding;nucleic acid binding;protein binding	cell part;chromatin;chromosomal part;chromosome;condensed chromosome;condensed nuclear chromosome;extracellular membrane-bounded organelle;extracellular organelle;extracellular region part;extracellular vesicular exosome;germ cell nucleus;intracellular membrane-bounded organelle;intracellular non-membrane-bounded organelle;intracellular organelle;intracellular organelle part;intracellular part;ma…	Histone	Systemic lupus erythematosus	8	8	0	45	45	0	18.481	179.91	6266900000	4908700000	1358200000	0.0710937	-0.0563568	0.177693	0.334605	3.62597	-1.93813	2.5848	-2.45504	A0A0U1RR32;A0A0U1RRH7;Q99878;Q96KK5;Q9BTM1;P20671;P0C0S8;H0YFX9;Q9BTM1-2;P16104;Q96QV6;REV__H0Y672;REV__E7EQ67;REV__H7BY63;REV__Q8NB25-4;REV__Q8NB25-2;REV__A0A087X2A7;REV__Q8NB25-3;REV__Q8NB25;Q71UI9-5	A0A0U1RR32;A0A0U1RRH7;Q99878;Q96KK5;Q9BTM1;P20671;P0C0S8;H0YFX9;Q9BTM1-2;P16104;Q96QV6	Histone H2A type 1-J;Histone H2A type 1-H;Histone H2A.J;Histone H2A type 1-D;Histone H2A type 1;Histone H2A;Histone H2AX;Histone H2A type 1-A	HIST1H2AJ;HIST1H2AH;H2AFJ;HIST1H2AD;HIST1H2AG;H2AFX;HIST1H2AA
NaN	NaN	NaN	NaN	NaN	NaN	NaN	NaN	NaN	NaN	NaN	0.752235					anatomical structure morphogenesis;biological regulation;cell cycle;cell cycle phase;cell cycle process;cell division;cell part morphogenesis;cell projection morphogenesis;cell projection organization;cellular component assembly;cellular component morphogenesis;cellular component organization;cellular component organization at cellular level;cellular component organization or biogenesis;cellular …	binding;GTP binding;guanyl nucleotide binding;guanyl ribonucleotide binding;identical protein binding;nucleotide binding;protein binding;purine nucleotide binding;purine ribonucleoside triphosphate binding;purine ribonucleotide binding;ribonucleotide binding;structural molecule activity	actin cytoskeleton;actin filament bundle;actomyosin;axon part;axon terminus;axoneme;cell cortex part;cell division site part;cell part;cell projection part;chromosomal part;cleavage furrow;condensed chromosome kinetochore;cytoplasm;cytoplasmic part;cytoskeletal part;cytoskeleton;extracellular membrane-bounded organelle;extracellular organelle;extracellular region part;extracellular vesicular exos…	Septin		2	2	2	12.9	12.9	12.9	16.464	2.2838	5275900	1886400	3389500	0	NaN	0	NaN	0	NaN	0	0.652235	A0A0U1RRH9;A0A0U1RRE1;G3V1Q4;E7ES33;E7EPK1;Q16181-2;Q16181;Q6ZU15	A0A0U1RRH9;A0A0U1RRE1;G3V1Q4;E7ES33;E7EPK1;Q16181-2;Q16181;Q6ZU15	Septin-7;Septin-14	SEPT7;SEPT14
NaN	NaN	NaN	NaN	NaN	NaN	0.930851	NaN	NaN	1.33388	0.767655	1.11929						enzyme regulator activity;GTPase regulator activity;guanyl-nucleotide exchange factor activity;nucleoside-triphosphatase regulator activity;Ras guanyl-nucleotide exchange factor activity;Rho guanyl-nucleotide exchange factor activity;small GTPase regulator activity		PH;RhoGEF		8	8	8	8.3	8.3	8.3	134.41	13.351	20100000	5835400	14265000	0	NaN	0	NaN	0	0.830851	1.55981	0.973609	A1L390;A1L390-3;G3V3I3;G3V278;G3V311;A1L390-2;A0A0U1RR71	A1L390;A1L390-3;G3V3I3;G3V278;G3V311;A1L390-2	Pleckstrin homology domain-containing family G member 3	PLEKHG3
NaN	NaN	NaN	NaN	NaN	NaN	NaN	NaN	NaN	NaN	NaN	NaN					biosynthetic process;cellular biosynthetic process;cellular component disassembly;cellular component disassembly at cellular level;cellular component organization;cellular component organization at cellular level;cellular component organization or biogenesis;cellular component organization or biogenesis at cellular level;cellular macromolecular complex disassembly;cellular macromolecular complex …	structural constituent of ribosome;structural molecule activity	cell part;cytoplasm;cytoplasmic part;intracellular membrane-bounded organelle;intracellular non-membrane-bounded organelle;intracellular organelle;intracellular organelle part;intracellular part;macromolecular complex;membrane;membrane-bounded organelle;mitochondrial inner membrane;mitochondrial membrane;mitochondrial part;mitochondrial ribosome;mitochondrion;non-membrane-bounded organelle;nuclea…			1	1	1	5	5	5	28.506	2.4388	583360	248350	335000	0	NaN	0	NaN	0	NaN	0	NaN	A2IDC6;Q13084	A2IDC6;Q13084	39S ribosomal protein L28, mitochondrial	MRPL28
NaN	NaN	NaN	NaN	NaN	NaN	NaN	NaN	NaN	NaN	NaN	NaN					biological regulation;biosynthetic process;catabolic process;cellular biosynthetic process;cellular catabolic process;cellular macromolecule biosynthetic process;cellular macromolecule catabolic process;cellular macromolecule metabolic process;cellular metabolic process;cellular nitrogen compound metabolic process;cellular process;developmental process;gene expression;gene silencing;gene silencin…	armadillo repeat domain binding;binding;estrogen receptor binding;hormone receptor binding;nuclear hormone receptor binding;protein binding;protein complex scaffold;protein domain specific binding;receptor binding;retinoic acid receptor binding;steroid hormone receptor binding;structural molecule activity;transcription factor binding	CCR4-NOT complex;cell part;cytoplasmic mRNA processing body;cytoplasmic part;cytosol;extracellular region part;extracellular space;intracellular membrane-bounded organelle;intracellular non-membrane-bounded organelle;intracellular organelle;intracellular organelle part;intracellular part;macromolecular complex;membrane;membrane-bounded organelle;microbody;microbody membrane;microbody part;non-mem…	DUF3819;Not1	RNA degradation	1	1	1	2.5	2.5	2.5	49.776	2.6877	2039200	801680	1237500	0	NaN	0	NaN	0	NaN	0	NaN	H3BMZ2;A5YKK6-3;A5YKK6-2;A5YKK6	H3BMZ2;A5YKK6-3;A5YKK6-2;A5YKK6	CCR4-NOT transcription complex subunit 1	CNOT1
NaN	NaN	NaN	NaN	NaN	NaN	NaN	-0.678003	-0.673854	-0.216418	NaN	NaN			+		biological regulation;biosynthetic process;cell cycle;cellular biosynthetic process;cellular component organization;cellular component organization at cellular level;cellular component organization or biogenesis;cellular component organization or biogenesis at cellular level;cellular macromolecule biosynthetic process;cellular macromolecule metabolic process;cellular metabolic process;cellular ni…	binding;chromatin binding;identical protein binding;nucleic acid binding transcription factor activity;protein binding;protein binding transcription factor activity;sequence-specific DNA binding transcription factor activity;transcription coactivator activity;transcription cofactor activity;transcription factor binding transcription factor activity	cell body;cell part;chromatin remodeling complex;cytoplasm;cytoplasmic part;histone acetyltransferase complex;histone methyltransferase complex;intracellular membrane-bounded organelle;intracellular organelle;intracellular organelle part;intracellular part;macromolecular complex;membrane;membrane-bounded organelle;methyltransferase complex;mitochondrion;MLL1 complex;MLL5-L complex;neuronal cell b…	Kelch_1		2	2	2	1.4	1.4	1.4	213.47	3.5605	2965100	1718800	1246300	0	NaN	0	NaN	2.76905	-0.775928	0	-0.316418	A6NEM2;P51610-2;P51610;P51610-4;P51610-3	A6NEM2;P51610-2;P51610;P51610-4;P51610-3	Host cell factor 1;HCF N-terminal chain 1;HCF N-terminal chain 2;HCF N-terminal chain 3;HCF N-terminal chain 4;HCF N-terminal chain 5;HCF N-terminal chain 6;HCF C-terminal chain 1;HCF C-terminal chain 2;HCF C-terminal chain 3;HCF C-terminal chain 4;HCF C-terminal chain 5;HCF C-terminal chain 6	HCFC1
NaN	NaN	NaN	NaN	NaN	NaN	NaN	NaN	NaN	NaN	NaN	NaN					biological regulation;establishment of localization;establishment of protein localization;establishment of protein localization in membrane;establishment of protein localization in plasma membrane;macromolecule metabolic process;metabolic process;positive regulation of biological process;positive regulation of cell communication;positive regulation of cellular process;positive regulation of Notch…	binding;enzyme binding;protein binding	cell part;cell surface;integral to membrane;intrinsic to membrane;membrane;membrane part;plasma membrane	Tetraspannin		1	1	1	5.2	5.2	5.2	23.918	11.581	4391300	0	4391300	0	NaN	0	NaN	0	NaN	0	NaN	H7BXY6;A6NEP9;Q8NG11-3;Q8NG11-2;Q8NG11	H7BXY6;A6NEP9;Q8NG11-3;Q8NG11-2;Q8NG11	Tetraspanin;Tetraspanin-14	TSPAN14
NaN	NaN	NaN	-0.578629	-0.474633	-0.627293	0.574441	0.437228	0.622274	0.6124	0.716771	0.870345					biological regulation;cellular component organization;cellular component organization at cellular level;cellular component organization or biogenesis;cellular component organization or biogenesis at cellular level;cellular process;chromosome organization;dosage compensation;dosage compensation, by inactivation of X chromosome;inactivation of X chromosome by DNA methylation;organelle organization;…	adenyl nucleotide binding;adenyl ribonucleotide binding;ATP binding;binding;nucleotide binding;purine nucleotide binding;purine ribonucleoside triphosphate binding;purine ribonucleotide binding;ribonucleotide binding	Barr body;cell part;chromosome;intracellular non-membrane-bounded organelle;intracellular organelle;intracellular organelle part;intracellular part;non-membrane-bounded organelle;nuclear chromosome;nuclear part;organelle;organelle part;sex chromosome;X chromosome	SMC_hinge		16	16	16	10.4	10.4	10.4	226.37	57.762	49280000	18355000	30925000	0	NaN	2.33546	-0.660185	1.81812	0.444648	1.86294	0.633172	A6NHR9;A6NHR9-2;J3KTL8;A6NHR9-3	A6NHR9;A6NHR9-2	Structural maintenance of chromosomes flexible hinge domain-containing protein 1	SMCHD1
NaN	NaN	NaN	NaN	NaN	NaN	NaN	-0.0810032	0.0313951	NaN	NaN	NaN					anatomical structure morphogenesis;axon cargo transport;axonogenesis;biological regulation;cell cycle;cell cycle process;cell migration;cell motility;cell part morphogenesis;cell projection morphogenesis;cell projection organization;cell proliferation;cellular component disassembly;cellular component disassembly at cellular level;cellular component morphogenesis;cellular component movement;cellul…	binding;catalytic activity;cytoskeletal protein binding;hydrolase activity;microtubule binding;oligopeptidase activity;peptidase activity;protein binding;tubulin binding	axon hillock;axon part;cell leading edge;cell part;cell projection part;centrosome;chromosomal part;condensed chromosome kinetochore;cytoplasm;cytoplasmic part;cytoskeletal part;cytoskeleton;cytosol;envelope;intermediate filament cytoskeleton;intracellular non-membrane-bounded organelle;intracellular organelle;intracellular organelle part;intracellular part;kinesin complex;kinetochore;macromolecu…	NUDE_C		1	1	1	22.2	22.2	22.2	8.5232	3.021	123060000	66134000	56927000	0	NaN	0	NaN	0.569674	-0.124804	0	NaN	J3KT16;J3KRK9;J3QL85;A6NIZ0;Q9GZM8-3;Q9GZM8;Q9GZM8-2	J3KT16;J3KRK9;J3QL85;A6NIZ0;Q9GZM8-3;Q9GZM8;Q9GZM8-2	Nuclear distribution protein nudE-like 1	NDEL1
NaN	NaN	NaN	NaN	NaN	NaN	NaN	NaN	NaN	NaN	NaN	NaN					biosynthetic process;cellular biosynthetic process;cellular component disassembly;cellular component disassembly at cellular level;cellular component organization;cellular component organization at cellular level;cellular component organization or biogenesis;cellular component organization or biogenesis at cellular level;cellular macromolecular complex disassembly;cellular macromolecular complex …	binding;nucleic acid binding;nucleotide binding;RNA binding;structural constituent of ribosome;structural molecule activity	cell part;cytoplasmic part;intracellular membrane-bounded organelle;intracellular non-membrane-bounded organelle;intracellular organelle;intracellular organelle part;intracellular part;large ribosomal subunit;macromolecular complex;membrane;membrane-bounded organelle;mitochondrial inner membrane;mitochondrial large ribosomal subunit;mitochondrial membrane;mitochondrial part;mitochondrion;non-memb…	Ribosomal_L23		1	1	1	12.7	12.7	12.7	13.669	3.6045	4023100	1963600	2059500	0	NaN	0	NaN	0	NaN	0	NaN	H7C2P7;A6NJD9;A8MVT4;A8MYK1;Q16540	H7C2P7;A6NJD9;A8MVT4;A8MYK1;Q16540	39S ribosomal protein L23, mitochondrial	MRPL23
NaN	NaN	NaN	NaN	NaN	NaN	NaN	NaN	NaN	NaN	NaN	NaN					cellular process;establishment of localization;establishment of localization in cell;establishment of protein localization;establishment of protein localization in Golgi;establishment of protein localization to organelle;Golgi vesicle transport;intracellular protein transport;intracellular transport;intra-Golgi vesicle-mediated transport;protein targeting;protein targeting to Golgi;protein transp…			GRIP;Ran_BP1;TPR_1		7	1	1	5.1	0.7	0.7	197.62	22.057	0	0	0	0	NaN	0	NaN	0	NaN	0	NaN	J3KNE0;Q7Z3J3;A6NKT7	J3KNE0;Q7Z3J3;A6NKT7	RanBP2-like and GRIP domain-containing protein 4;RanBP2-like and GRIP domain-containing protein 3	RGPD3;RGPD4
NaN	NaN	NaN	NaN	NaN	3.91781	NaN	4.64754	NaN	NaN	NaN	NaN					biological regulation;cellular process;cellular response to stimulus;ER to Golgi vesicle-mediated transport;establishment of localization;establishment of localization in cell;establishment of protein localization;Golgi vesicle transport;intracellular signal transduction;intracellular transport;protein transport;regulation of biological process;regulation of cellular process;response to stimulus;…	binding;CCR chemokine receptor binding;CCR5 chemokine receptor binding;chemokine receptor binding;cytokine receptor binding;G-protein-coupled receptor binding;protein binding;receptor binding	cell part;cytoplasmic part;endoplasmic reticulum;endoplasmic reticulum-Golgi intermediate compartment;integral to membrane;intracellular membrane-bounded organelle;intracellular organelle;intracellular part;intrinsic to membrane;membrane;membrane part;membrane-bounded organelle;organelle	Cornichon		1	1	1	14.6	14.6	14.6	15.771	4.6232	75719000	1236200	74483000	0	NaN	0	3.81781	0	4.54754	0	NaN	A6NLH6;Q9P003	A6NLH6;Q9P003	Protein cornichon homolog 4	CNIH4
NaN	NaN	NaN	NaN	NaN	NaN	-0.730656	NaN	NaN	-1.11375	NaN	NaN					biological regulation;biosynthetic process;cellular biosynthetic process;cellular macromolecule biosynthetic process;cellular macromolecule metabolic process;cellular metabolic process;cellular nitrogen compound metabolic process;cellular process;cellular response to stimulus;cellular response to stress;DNA metabolic process;DNA recombination;DNA repair;double-strand break repair;double-strand br…	activating transcription factor binding;binding;damaged DNA binding;DNA binding;histone binding;methylated histone residue binding;nucleic acid binding;p53 binding;protein binding;protein binding transcription factor activity;RNA polymerase II activating transcription factor binding;RNA polymerase II transcription cofactor activity;RNA polymerase II transcription factor binding;RNA polymerase II …	cell part;chromosomal part;condensed chromosome kinetochore;cytoplasm;intracellular membrane-bounded organelle;intracellular non-membrane-bounded organelle;intracellular organelle;intracellular organelle part;intracellular part;kinetochore;macromolecular complex;membrane-bounded organelle;non-membrane-bounded organelle;nuclear part;nucleoplasm;nucleus;organelle;organelle part;protein complex;repl…	53-BP1_Tudor		7	7	7	5.3	5.3	5.3	209.02	13.314	10786000	7084300	3701900	0	NaN	0	NaN	0	-0.830656	0	-1.21375	A6NNK5;Q12888;Q12888-3;Q12888-2;M0R142;H7C3N7;C9JXV0;H7BZY0	A6NNK5;Q12888;Q12888-3;Q12888-2	Tumor suppressor p53-binding protein 1	TP53BP1
NaN	NaN	NaN	NaN	NaN	NaN	NaN	NaN	NaN	0.975483	NaN	NaN					anatomical structure formation involved in morphogenesis;biological regulation;cell cycle;cell cycle process;cell projection assembly;cell projection organization;cellular component assembly;cellular component assembly at cellular level;cellular component assembly involved in morphogenesis;cellular component movement;cellular component organization;cellular component organization at cellular leve…	binding;identical protein binding;protein binding	cell part;centriolar satellite;centrosome;cytoplasm;cytoplasmic part;cytoskeletal part;cytosol;intracellular non-membrane-bounded organelle;intracellular organelle;intracellular organelle part;intracellular part;macromolecular complex;membrane;microtubule organizing center;microtubule organizing center part;non-membrane-bounded organelle;nuclear membrane;nuclear part;organelle;organelle membrane;…			2	2	2	1.1	1.1	1.1	210.13	3.2003	1836500	434170	1402400	0	NaN	0	NaN	0	NaN	0	0.875483	A6NNN6;E7ETA6;Q15154-2;Q15154;E5RGQ4;E9PGW9;E7EV93;H0YBA1;Q15154-3	A6NNN6;E7ETA6;Q15154-2;Q15154;E5RGQ4;E9PGW9;E7EV93;H0YBA1;Q15154-3	Pericentriolar material 1 protein	PCM1
NaN	NaN	NaN	NaN	NaN	NaN	NaN	NaN	NaN	NaN	NaN	NaN					anatomical structure development;biological regulation;central nervous system development;developmental process;establishment of localization;establishment of RNA localization;mRNA transport;negative regulation of biological process;negative regulation of biosynthetic process;negative regulation of cellular biosynthetic process;negative regulation of cellular macromolecule biosynthetic process;ne…	binding;mRNA binding;nucleic acid binding;RNA binding	cell body;cell part;cell projection;cell projection part;cytoplasm;cytoplasmic part;cytoskeletal part;dendritic shaft;dendritic spine;intracellular non-membrane-bounded organelle;intracellular organelle;intracellular organelle part;intracellular part;macromolecular complex;membrane;microtubule;mRNA cap binding complex;neuron projection;neuron spine;neuronal RNA granule;non-membrane-bounded organe…	Agenet;FXR1P_C;KH_1		2	1	1	3.9	2.4	2.4	61.515	2.4523	863420	106020	757400	0	NaN	0	NaN	0	NaN	0	NaN	R9WNI0;A8MQB8;G3V0J0;Q06787-8;Q06787-6;Q06787-2;Q06787-4;Q06787-5;Q06787-9;Q06787-7;Q06787-3;Q06787;Q8IXW7;A0A087WXI3;G8JLE9	R9WNI0;A8MQB8;G3V0J0;Q06787-8;Q06787-6;Q06787-2;Q06787-4;Q06787-5;Q06787-9;Q06787-7;Q06787-3;Q06787;Q8IXW7;A0A087WXI3;G8JLE9	Fragile X mental retardation protein 1	FMR1
-0.0228007	-0.159815	-0.0691945	-0.124393	-0.141939	-0.0348548	0.081476	0.0564447	-0.00762311	-0.7051	-0.747681	-0.620335				+	biological regulation;biosynthetic process;cellular biosynthetic process;cellular component assembly;cellular component assembly at cellular level;cellular component organization;cellular component organization at cellular level;cellular component organization or biogenesis;cellular component organization or biogenesis at cellular level;cellular macromolecular complex assembly;cellular macromolec…	binding;histone pre-mRNA DCP binding;nucleic acid binding;RNA binding	catalytic step 2 spliceosome;cell part;cytoplasm;cytoplasmic part;cytosol;extracellular membrane-bounded organelle;extracellular organelle;extracellular region part;extracellular vesicular exosome;histone pre-mRNA 3'end processing complex;intracellular organelle part;intracellular part;macromolecular complex;membrane-bounded organelle;membrane-bounded vesicle;methylosome;methyltransferase complex…	LSM	Spliceosome;Systemic lupus erythematosus	5	5	5	26.6	26.6	26.6	17.546	31.21	343180000	188060000	155120000	1.35004	-0.183937	1.57996	-0.200396	0.778194	-0.0565675	2.65146	-0.791039	J3QLE5;A8MT02;P14678-2;P63162;P14678;P63162-2;P14678-3;J3KRY3;S4R3P3	J3QLE5;A8MT02;P14678-2;P63162;P14678;P63162-2;P14678-3;J3KRY3;S4R3P3	Small nuclear ribonucleoprotein-associated proteins B and B;Small nuclear ribonucleoprotein-associated protein N	SNRPN;SNRPB
NaN	NaN	NaN	NaN	NaN	NaN	NaN	-0.00495696	NaN	NaN	NaN	NaN					amine metabolic process;amino acid activation;apoptosis;biological regulation;carboxylic acid metabolic process;cell death;cell differentiation;cellular amine metabolic process;cellular amino acid metabolic process;cellular developmental process;cellular ketone metabolic process;cellular macromolecule metabolic process;cellular metabolic process;cellular nitrogen compound metabolic process;cellul…		cell part;cytoplasmic part;cytosol;intracellular membrane-bounded organelle;intracellular organelle;intracellular part;membrane;membrane-bounded organelle;nucleus;organelle	GST_C_3		2	2	2	9.1	9.1	9.1	26.76	4.075	3936300	1905600	2030700	0	NaN	0	NaN	0	-0.104957	0	NaN	A8MU58;F8W950;Q13155	A8MU58;F8W950;Q13155	Aminoacyl tRNA synthase complex-interacting multifunctional protein 2	AIMP2
-0.193123	0.0542234	-0.168528	NaN	-0.0437203	-0.0142664	0.119555	-0.0213797	-0.104806	-0.144728	NaN	0.118227					biosynthetic process;catabolic process;cell proliferation;cellular biosynthetic process;cellular catabolic process;cellular component disassembly;cellular component disassembly at cellular level;cellular component organization;cellular component organization at cellular level;cellular component organization or biogenesis;cellular component organization or biogenesis at cellular level;cellular mac…	binding;nucleic acid binding;nucleotide binding;RNA binding;rRNA binding;structural constituent of ribosome;structural molecule activity	cell part;cytoplasm;cytoplasmic part;cytosol;cytosolic large ribosomal subunit;extracellular membrane-bounded organelle;extracellular organelle;extracellular region part;extracellular vesicular exosome;intracellular membrane-bounded organelle;intracellular non-membrane-bounded organelle;intracellular organelle;intracellular organelle part;intracellular part;large ribosomal subunit;macromolecular …	Ribosomal_L23;Ribosomal_L23eN	Ribosome	8	8	8	42.4	42.4	42.4	17.692	34.642	372110000	187790000	184320000	0.908006	-0.202476	1.14045	-0.128993	0.586891	-0.10221	0.261753	-0.113251	H7BY10;K7EJV9;K7ERT8;A8MUS3;P62750;K7EMA7	H7BY10;K7EJV9;K7ERT8;A8MUS3;P62750;K7EMA7	60S ribosomal protein L23a	RPL23A
NaN	NaN	NaN	NaN	NaN	NaN	NaN	NaN	NaN	-1.05643	NaN	NaN					biosynthetic process;cellular biosynthetic process;cellular component assembly;cellular component assembly at cellular level;cellular component organization;cellular component organization at cellular level;cellular component organization or biogenesis;cellular component organization or biogenesis at cellular level;cellular macromolecular complex assembly;cellular macromolecular complex subunit o…	binding;nucleic acid binding;RNA binding	catalytic step 2 spliceosome;cell part;cytoplasmic part;cytosol;intracellular organelle part;intracellular part;macromolecular complex;methylosome;methyltransferase complex;nuclear part;nucleoplasm;organelle part;protein complex;ribonucleoprotein complex;small nuclear ribonucleoprotein complex;small nucleolar ribonucleoprotein complex;SMN-Sm protein complex;spliceosomal complex;U1 snRNP;U12-type …	LSM	Spliceosome	3	3	3	31.2	31.2	31.2	7.1013	18.589	14147000	8254100	5893000	0	NaN	0	NaN	0	NaN	0	-1.15643	Q49AN9;F5H013;P62308;A8MWD9;C9JVQ0	Q49AN9;F5H013;P62308;A8MWD9	Small nuclear ribonucleoprotein G;Putative small nuclear ribonucleoprotein G-like protein 15	SNRPG;SNRPGP15
NaN	-0.367415	NaN	NaN	NaN	NaN	NaN	NaN	NaN	NaN	NaN	NaN					amine metabolic process;anatomical structure development;biological regulation;carboxylic acid metabolic process;cell proliferation;cellular amine metabolic process;cellular amino acid metabolic process;cellular ketone metabolic process;cellular metabolic process;cellular modified amino acid metabolic process;cellular nitrogen compound metabolic process;cellular process;cellular response to bioti…	binding;catalytic activity;dinitrosyl-iron complex binding;enzyme binding;enzyme regulator activity;glutathione transferase activity;JUN kinase binding;kinase binding;kinase regulator activity;nitric oxide binding;protein binding;protein kinase binding;S-nitrosoglutathione binding;transferase activity;transferase activity, transferring alkyl or aryl (other than methyl) groups	cell part;cytoplasm;cytoplasmic part;cytosol;extracellular membrane-bounded organelle;extracellular organelle;extracellular region part;extracellular space;extracellular vesicular exosome;intracellular;intracellular membrane-bounded organelle;intracellular organelle;intracellular part;macromolecular complex;membrane;membrane-bounded organelle;membrane-bounded vesicle;mitochondrion;nucleus;organel…	GST_C;GST_N	Drug metabolism - cytochrome P450;Glutathione metabolism;Metabolism of xenobiotics by cytochrome P450	5	5	5	28.2	28.2	28.2	19.48	13.044	16440000	9133200	7306800	0	-0.467415	0	NaN	0	NaN	0	NaN	A8MX94;P09211;A0A087X2E9	A8MX94;P09211;A0A087X2E9	Glutathione S-transferase P	GSTP1
NaN	NaN	NaN	NaN	NaN	NaN	NaN	NaN	NaN	NaN	NaN	NaN					antigen processing and presentation;biological regulation;cellular component organization;cellular component organization at cellular level;cellular component organization or biogenesis;cellular component organization or biogenesis at cellular level;cellular localization;cellular macromolecule localization;cellular membrane organization;cellular process;cellular protein localization;cellular resp…	binding;catalytic activity;enzyme binding;GTP binding;GTPase activity;GTPase binding;guanyl nucleotide binding;guanyl ribonucleotide binding;hydrolase activity;hydrolase activity, acting on acid anhydrides;hydrolase activity, acting on acid anhydrides, in phosphorus-containing anhydrides;nucleoside-triphosphatase activity;nucleotide binding;protein binding;purine nucleotide binding;purine ribonuc…	cell part;cell projection;cytoplasmic membrane-bounded vesicle;cytoplasmic part;cytoplasmic vesicle;cytoplasmic vesicle membrane;cytoplasmic vesicle part;early endosome;endocytic vesicle;endocytic vesicle membrane;endosome;extracellular membrane-bounded organelle;extracellular organelle;extracellular region part;extracellular vesicular exosome;Golgi apparatus;Golgi apparatus part;Golgi cisterna;G…	Ras		2	2	2	10.9	10.9	10.9	23.757	4.379	487830	211990	275840	0	NaN	0	NaN	0	NaN	0	NaN	Q96PJ7;C9JBG0;C9JY26;A8MYQ9;E7ES60;Q9BZG1-4;Q9BZG1;J3QLC6;Q9BZG1-2	Q96PJ7;C9JBG0;C9JY26;A8MYQ9;E7ES60;Q9BZG1-4;Q9BZG1;J3QLC6;Q9BZG1-2	Ras-related protein Rab-34	RAB34
NaN	NaN	NaN	NaN	NaN	NaN	NaN	NaN	NaN	NaN	NaN	NaN					biological regulation;cellular component assembly;cellular component assembly at cellular level;cellular component organization;cellular component organization at cellular level;cellular component organization or biogenesis;cellular component organization or biogenesis at cellular level;cellular macromolecular complex assembly;cellular macromolecular complex subunit organization;cellular process;…	binding;identical protein binding;mRNA binding;nucleic acid binding;protein binding;RNA binding	cell part;intracellular organelle part;intracellular part;macromolecular complex;nuclear part;organelle part;ribonucleoprotein complex;small nuclear ribonucleoprotein complex;U1 snRNP	LUC7		2	1	1	8.5	5.5	5.5	32.447	3.2068	597820	275550	322260	0	NaN	0	NaN	0	NaN	0	NaN	A8MYV2;Q9NQ29-2;Q9NQ29-3;Q9NQ29;B8ZZ12;B8ZZ09;B8ZZ10	A8MYV2;Q9NQ29-2;Q9NQ29-3;Q9NQ29;B8ZZ12;B8ZZ09;B8ZZ10	Putative RNA-binding protein Luc7-like 1	LUC7L
NaN	NaN	NaN	NaN	NaN	NaN	NaN	NaN	NaN	NaN	NaN	NaN							cell part;cytoplasmic part;intracellular membrane-bounded organelle;intracellular organelle;intracellular part;membrane-bounded organelle;mitochondrion;organelle	Hydrolase_6		1	1	1	5.4	5.4	5.4	23.831	2.3062	315870	164780	151090	0	NaN	0	NaN	0	NaN	0	NaN	A8MYZ9;Q9BXW7-2;Q9BXW7	A8MYZ9;Q9BXW7-2;Q9BXW7	Cat eye syndrome critical region protein 5	CECR5
NaN	NaN	NaN	NaN	NaN	NaN	NaN	NaN	NaN	NaN	NaN	NaN					biosynthetic process;cellular biosynthetic process;cellular macromolecule biosynthetic process;cellular macromolecule metabolic process;cellular metabolic process;cellular nitrogen compound metabolic process;cellular process;establishment of localization;establishment of localization in cell;establishment of RNA localization;gene expression;intracellular transport;macromolecule biosynthetic proce…	binding;DNA binding;nucleic acid binding	catalytic step 2 spliceosome;cell part;cytoplasmic part;cytosol;intracellular membrane-bounded organelle;intracellular organelle;intracellular organelle part;intracellular part;macromolecular complex;membrane-bounded organelle;nuclear body;nuclear matrix;nuclear part;nuclear speck;nucleoplasm;nucleoplasm part;nucleus;organelle;organelle part;ribonucleoprotein complex;spliceosomal complex	PWI	mRNA surveillance pathway;RNA transport	3	3	3	4.8	4.8	4.8	78.139	2.4816	24134000	3199200	20935000	0	NaN	0	NaN	0	NaN	0	NaN	M0R088;E9PCT1;A9Z1X7;Q8IYB3-2;Q8IYB3	M0R088;E9PCT1;A9Z1X7;Q8IYB3-2;Q8IYB3	Serine/arginine repetitive matrix protein 1	SRRM1
NaN	0.276913	NaN	NaN	0.0130691	0.307545	0.0897694	-0.00617352	NaN	0.137635	0.204767	NaN							cell part;integral to membrane;intrinsic to membrane;membrane part	C2;FerB;FerI		4	4	3	1.6	1.6	1.6	200.98	9.0459	293620000	124700000	168920000	0	0.176913	0.123484	0.0603071	0.357688	-0.0582021	0.552144	0.0712008	A9Z1Z3;A9Z1Z3-3;A9Z1Z3-2	A9Z1Z3;A9Z1Z3-3	Fer-1-like protein 4	FER1L4
-0.847492	-1.21461	0.163499	NaN	NaN	NaN	NaN	0.19862	NaN	0.765874	0.586789	0.824564					biological regulation;cellular component assembly;cellular component assembly at cellular level;cellular component organization;cellular component organization at cellular level;cellular component organization or biogenesis;cellular component organization or biogenesis at cellular level;cellular macromolecular complex assembly;cellular macromolecular complex subunit organization;cellular process;…	binding;nucleic acid binding;RNA binding;translation factor activity, nucleic acid binding;translation initiation factor activity	cell part;cytoplasmic part;eukaryotic 43S preinitiation complex;eukaryotic 48S preinitiation complex;eukaryotic translation initiation factor 3 complex;fibrillar center;intracellular organelle part;intracellular part;macromolecular complex;membrane;nuclear part;nucleolar part;nucleoplasm;organelle part;protein complex;ribonucleoprotein complex;translation preinitiation complex	Paf67		7	7	7	13	13	13	70.901	15.055	34677000	16223000	18453000	0.662995	-0.732867	0	NaN	0	0.0986199	1.89243	0.625742	B0QY89;Q9Y262;Q9Y262-2;C9JHP4;C9K0Q7;B0QY90;H7C3A0	B0QY89;Q9Y262;Q9Y262-2;C9JHP4;C9K0Q7;B0QY90	Eukaryotic translation initiation factor 3 subunit L	EIF3L
NaN	NaN	NaN	NaN	NaN	NaN	NaN	NaN	-0.564606	NaN	NaN	NaN					biological regulation;catabolic process;cellular catabolic process;cellular macromolecule metabolic process;cellular metabolic process;cellular nitrogen compound catabolic process;cellular nitrogen compound metabolic process;cellular process;cellular response to chemical stimulus;cellular response to stimulus;cellular response to xenobiotic stimulus;clearance of foreign intracellular DNA;clearanc…	binding;catalytic activity;cation binding;cytidine deaminase activity;deaminase activity;deoxycytidine deaminase activity;hydrolase activity;hydrolase activity, acting on carbon-nitrogen (but not peptide) bonds;hydrolase activity, acting on carbon-nitrogen (but not peptide) bonds, in cyclic amidines;ion binding;metal ion binding;transition metal ion binding;zinc ion binding	cell part;cytoplasm;intracellular membrane-bounded organelle;intracellular organelle;intracellular organelle part;intracellular part;membrane-bounded organelle;nuclear part;nucleoplasm;nucleus;organelle;organelle part	APOBEC_C;APOBEC_N	Atrazine degradation	4	4	4	9.2	9.2	9.2	57.208	6.0402	4974500	3224200	1750200	0	NaN	0	NaN	0	-0.664606	0	NaN	B0QYD3;Q9UH17;Q9UH17-3;P31941-2;P31941;Q9UH17-2;Q6ICH2;Q96AK3	B0QYD3;Q9UH17;Q9UH17-3;P31941-2;P31941;Q9UH17-2	DNA dC->dU-editing enzyme APOBEC-3B;DNA dC->dU-editing enzyme APOBEC-3A	APOBEC3B;APOBEC3A
-0.2983	-0.354704	-0.244104	-0.495593	-0.398075	-0.556733	0.0150693	0.0174944	0.0313951	-0.771249	-0.642527	-0.712031			+	+	biological regulation;biosynthetic process;cellular biosynthetic process;cellular macromolecule biosynthetic process;cellular macromolecule metabolic process;cellular metabolic process;cellular nitrogen compound metabolic process;cellular process;macromolecule biosynthetic process;macromolecule metabolic process;metabolic process;nitrogen compound metabolic process;nucleic acid metabolic process;…	binding;cation binding;identical protein binding;ion binding;metal ion binding;nucleic acid binding;nucleotide binding;protein binding;RNA binding;transition metal ion binding;zinc ion binding	cell part;cytoplasm;intracellular membrane-bounded organelle;intracellular non-membrane-bounded organelle;intracellular organelle;intracellular organelle part;intracellular part;membrane;membrane-bounded organelle;non-membrane-bounded organelle;nuclear part;nucleolus;nucleoplasm;nucleus;organelle;organelle part;plasma membrane	zf-RanBP		8	8	2	17	17	7	64.929	247.74	2880800000	1680400000	1200300000	2.19778	-0.399036	2.20681	-0.583467	2.38166	-0.0786804	2.6758	-0.808602	B0QYK0;Q01844-6;Q01844-3;Q01844;Q01844-5;A0A0D9SFL3;C9JGE3;Q01844-2;F8WC90;Q01844-4	B0QYK0;Q01844-6;Q01844-3;Q01844;Q01844-5;A0A0D9SFL3;C9JGE3;Q01844-2	RNA-binding protein EWS	EWSR1
NaN	NaN	NaN	NaN	NaN	NaN	NaN	NaN	NaN	NaN	NaN	NaN					adult behavior;adult locomotory behavior;aggresome assembly;alcohol metabolic process;amine metabolic process;amine transport;anatomical structure development;anatomical structure homeostasis;autophagy;behavior;benzene-containing compound metabolic process;biological regulation;biosynthetic process;catabolic process;catecholamine metabolic process;catecholamine transport;catecholamine uptake invo…	acid-amino acid ligase activity;actin binding;binding;catalytic activity;cation binding;chaperone binding;cytoskeletal protein binding;enzyme binding;G-protein-coupled receptor binding;heat shock protein binding;histone deacetylase binding;Hsp70 protein binding;identical protein binding;ion binding;kinase binding;ligase activity;ligase activity, forming carbon-nitrogen bonds;metal ion binding;PDZ…	aggresome;cell part;cell projection;cytoplasm;cytoplasmic part;cytosol;endoplasmic reticulum;Golgi apparatus;inclusion body;intracellular membrane-bounded organelle;intracellular organelle;intracellular part;macromolecular complex;membrane-bounded organelle;mitochondrion;neuron projection;nucleus;organelle;perinuclear region of cytoplasm;protein complex;ubiquitin ligase complex	IBR;ubiquitin	Parkinson's disease;Protein processing in endoplasmic reticulum;Ubiquitin mediated proteolysis	2	2	2	6.5	6.5	6.5	40.537	6.6005	2238600	0	2238600	0	NaN	0	NaN	0	NaN	0	NaN	B1AKC3;O60260-7;O60260-5;O60260-8;O60260-2;O60260;A0A087X1E2;A0A087WU39;O60260-3;O60260-4;O60260-6	B1AKC3;O60260-7;O60260-5;O60260-8;O60260-2;O60260;A0A087X1E2;A0A087WU39;O60260-3;O60260-4;O60260-6	E3 ubiquitin-protein ligase parkin	PARK2
NaN	-0.501627	NaN	NaN	NaN	NaN	NaN	NaN	NaN	NaN	NaN	NaN					5-phosphoribose 1-diphosphate biosynthetic process;5-phosphoribose 1-diphosphate metabolic process;alcohol biosynthetic process;alcohol metabolic process;AMP biosynthetic process;AMP metabolic process;anatomical structure development;anatomical structure morphogenesis;biosynthetic process;carbohydrate biosynthetic process;carbohydrate metabolic process;cellular aromatic compound metabolic process…	adenyl nucleotide binding;adenyl ribonucleotide binding;ADP binding;AMP binding;ATP binding;binding;carbohydrate binding;catalytic activity;cation binding;diphosphotransferase activity;GDP binding;guanyl nucleotide binding;guanyl ribonucleotide binding;identical protein binding;ion binding;kinase activity;magnesium ion binding;metal ion binding;nucleotide binding;protein binding;protein dimerizat…	cell part;cytoplasmic part;cytosol;extracellular membrane-bounded organelle;extracellular organelle;extracellular region part;extracellular vesicular exosome;intracellular part;macromolecular complex;membrane-bounded organelle;membrane-bounded vesicle;organelle;protein complex;ribose phosphate diphosphokinase complex;vesicle	Pribosyl_synth;Pribosyltran_N	Pentose phosphate pathway;Purine metabolism	2	2	2	11.5	11.5	11.5	24.084	4.7541	4604100	2791500	1812600	0	-0.601627	0	NaN	0	NaN	0	NaN	B1ALA9;P60891-2;P60891;A6NMS2;B1ALA7;D3YTJ7;A0A0B4J207;P21108;P11908;P11908-2	B1ALA9;P60891-2;P60891;A6NMS2;B1ALA7;D3YTJ7;A0A0B4J207;P21108;P11908;P11908-2	Ribose-phosphate pyrophosphokinase 1;Ribose-phosphate pyrophosphokinase 3;Ribose-phosphate pyrophosphokinase 2	PRPS1;PRPS2;PRPS1L1
NaN	2.66607	NaN	NaN	NaN	NaN	NaN	NaN	NaN	NaN	NaN	NaN					establishment of localization;transport		cell part;cytoplasmic part;endosomal part;endosome;endosome membrane;integral to membrane;intracellular membrane-bounded organelle;intracellular organelle;intracellular organelle part;intracellular part;intrinsic to membrane;late endosome;late endosome membrane;lysosomal membrane;lysosome;lytic vacuole;membrane;membrane part;membrane-bounded organelle;organelle;organelle membrane;organelle part;v…	Tmemb_9		1	1	1	7	7	7	20.958	2.8123	8406900	693950	7712900	0	2.56607	0	NaN	0	NaN	0	NaN	B1ALM5;Q9P0T7	B1ALM5;Q9P0T7	Transmembrane protein 9	TMEM9
NaN	NaN	NaN	NaN	NaN	NaN	NaN	NaN	NaN	NaN	NaN	NaN					biological regulation;cell cycle;cell cycle phase;cell cycle process;cell division;cellular component organization;cellular component organization at cellular level;cellular component organization or biogenesis;cellular component organization or biogenesis at cellular level;cellular macromolecule metabolic process;cellular metabolic process;cellular process;cellular protein metabolic process;chro…	binding;chromatin binding	actin cytoskeleton;cell part;chromatin;chromosomal part;chromosome;chromosome, centromeric region;cytoplasmic part;cytoskeleton;cytosol;intermediate filament cytoskeleton;intracellular membrane-bounded organelle;intracellular non-membrane-bounded organelle;intracellular organelle;intracellular organelle part;intracellular part;membrane;membrane-bounded organelle;non-membrane-bounded organelle;nuc…	STAG	Cell cycle;Cell cycle - yeast;Meiosis - yeast	1	1	1	2.4	2.4	2.4	62.57	2.5948	1697600	950690	746910	0	NaN	0	NaN	0	NaN	0	NaN	B1AMT4;Q68DW7;Q8WVM7-2;Q8N3U4;Q8WVM7;Q8N3U4-2	B1AMT4;Q68DW7;Q8WVM7-2;Q8N3U4;Q8WVM7;Q8N3U4-2	Cohesin subunit SA-1;Cohesin subunit SA-2	STAG2;DKFZp781D1416;STAG1
NaN	NaN	NaN	NaN	NaN	NaN	NaN	NaN	NaN	NaN	NaN	NaN					cell migration;cell motility;cellular component movement;cellular metabolic process;cellular process;cobalamin metabolic process;cofactor metabolic process;defense response;digestion;endothelial cell migration;heterocycle metabolic process;immune response;immune system process;innate immune response;locomotion;macromolecule metabolic process;metabolic process;multicellular organismal process;nitr…	binding;calcium ion binding;catalytic activity;cation binding;endopeptidase activity;hydrolase activity;ion binding;metal ion binding;peptidase activity;peptidase activity, acting on L-amino acid peptides;serine hydrolase activity;serine-type endopeptidase activity;serine-type peptidase activity	extracellular membrane-bounded organelle;extracellular organelle;extracellular region;extracellular region part;extracellular space;extracellular vesicular exosome;membrane-bounded organelle;membrane-bounded vesicle;organelle;vesicle	Trypsin	Neuroactive ligand-receptor interaction;Pancreatic secretion;Protein digestion and absorption	1	1	1	7.3	7.3	7.3	19.401	23.015	15004000	14557000	446860	0	NaN	0	NaN	0	NaN	0	NaN	B1AN99;P35030-5;P35030-3;P35030-2;P35030-4;P35030	B1AN99;P35030-5;P35030-3;P35030-2;P35030-4;P35030	Trypsin-3	PRSS3
NaN	NaN	NaN	NaN	NaN	NaN	NaN	NaN	NaN	NaN	NaN	NaN					actin cytoskeleton organization;actin filament-based process;anatomical structure development;anatomical structure formation involved in morphogenesis;axon guidance;biological regulation;cardiac muscle fiber development;cell development;cell surface receptor linked signaling pathway;cellular component assembly;cellular component assembly at cellular level;cellular component assembly involved in m…	adenyl nucleotide binding;adenyl ribonucleotide binding;ATP binding;binding;catalytic activity;hydrolase activity;hydrolase activity, acting on acid anhydrides;hydrolase activity, acting on acid anhydrides, in phosphorus-containing anhydrides;motor activity;nucleoside-triphosphatase activity;nucleotide binding;purine nucleotide binding;purine ribonucleoside triphosphate binding;purine ribonucleot…	actin filament bundle;actomyosin;cell part;contractile fiber;contractile fiber part;cytoplasmic membrane-bounded vesicle;cytoplasmic part;cytoplasmic vesicle;cytoskeletal part;cytosol;extracellular membrane-bounded organelle;extracellular organelle;extracellular region part;extracellular vesicular exosome;intracellular membrane-bounded organelle;intracellular non-membrane-bounded organelle;intrac…	Myosin_head;Myosin_N;Myosin_tail_1	Tight junction;Viral myocarditis	26	2	2	11.4	1	1	234.23	3.7307	8355000	1266200	7088800	0	NaN	0	NaN	0	NaN	0	NaN	B1PS43;P35749-4;P35749-3;P35749;P35749-2;P13533	B1PS43;P35749-4;P35749-3;P35749;P35749-2	Myosin-11	MYH11
-0.340331	-0.451662	0.0600474	1.24963	1.22107	0.570366	-1.74082	-1.71539	-1.69914	-2.30872	-2.30536	-2.32424			+	+	anatomical structure development;antibacterial humoral response;antimicrobial humoral response;cellular component assembly;cellular component assembly at cellular level;cellular component organization;cellular component organization at cellular level;cellular component organization or biogenesis;cellular component organization or biogenesis at cellular level;cellular macromolecular complex assemb…	binding;DNA binding;nucleic acid binding	cell part;chromosomal part;extracellular membrane-bounded organelle;extracellular organelle;extracellular region part;extracellular space;extracellular vesicular exosome;intracellular membrane-bounded organelle;intracellular organelle;intracellular organelle part;intracellular part;macromolecular complex;membrane-bounded organelle;membrane-bounded vesicle;nuclear chromosome part;nuclear nucleosom…	Histone	Systemic lupus erythematosus	11	11	2	66.7	66.7	7.9	13.906	209.05	7469900000	5488200000	1981700000	0.803362	-0.343982	1.26608	0.913689	4.35181	-1.81845	5.236	-2.41277	B2R4S9;U3KQK0;Q99879;Q99877;Q93079;Q5QNW6;P62807;P58876;O60814;Q5QNW6-2;P57053;Q99880	B2R4S9;U3KQK0;Q99879;Q99877;Q93079;Q5QNW6;P62807;P58876;O60814;Q5QNW6-2;P57053;Q99880	Histone H2B;Histone H2B type 1-M;Histone H2B type 1-N;Histone H2B type 1-H;Histone H2B type 2-F;Histone H2B type 1-C/E/F/G/I;Histone H2B type 1-D;Histone H2B type 1-K;Histone H2B type F-S;Histone H2B type 1-L	HIST1H2BI;HIST1H2BN;HIST1H2BM;HIST1H2BH;HIST2H2BF;HIST1H2BC;HIST1H2BD;HIST1H2BK;H2BFS;HIST1H2BL
0.40294	0.207893	0.372618	0.638306	0.598842	0.84551	-1.26524	-1.15949	-1.13299	-1.71128	-1.57149	-1.58078			+	+	3'-UTR-mediated mRNA stabilization;ATP-dependent chromatin remodeling;biological regulation;cell differentiation;cellular component organization;cellular component organization at cellular level;cellular component organization or biogenesis;cellular component organization or biogenesis at cellular level;cellular developmental process;cellular macromolecule metabolic process;cellular metabolic pro…	binding;chromatin binding;chromatin DNA binding;core promoter proximal region DNA binding;core promoter proximal region sequence-specific DNA binding;DNA binding;enhancer binding;enhancer sequence-specific DNA binding;identical protein binding;mRNA 3'-UTR binding;mRNA binding;nucleic acid binding;nucleosomal DNA binding;nucleosome binding;nucleotide binding;poly(U) RNA binding;poly-pyrimidine tra…	catalytic step 2 spliceosome;cell part;chromatin;chromosomal part;cytoplasmic part;cytosol;extracellular membrane-bounded organelle;extracellular organelle;extracellular region part;extracellular vesicular exosome;intracellular membrane-bounded organelle;intracellular organelle;intracellular organelle part;intracellular part;macromolecular complex;membrane;membrane-bounded organelle;membrane-boun…	RRM_1	Spliceosome	17	17	8	55	55	35.9	28.916	137.19	1849600000	1292100000	557440000	1.19361	0.227817	1.79122	0.594219	3.00635	-1.28591	3.16326	-1.72118	G3V4W0;B4DY08;B2R5W2;G3V4C1;P07910-2;G3V2Q1;P07910;G3V576;P07910-4;G3V555;G3V575;P07910-3;G3V5X6;G3V3K6;G3V251;G3V2D6;B4DSU6;G3V5V7;G3V4M8;G3V2H6;E5RG71;B3KT61;Q86SE5;Q86SE5-3	G3V4W0;B4DY08;B2R5W2;G3V4C1;P07910-2;G3V2Q1;P07910;G3V576;P07910-4;G3V555;G3V575;P07910-3;G3V5X6;G3V3K6;G3V251;G3V2D6	Heterogeneous nuclear ribonucleoproteins C1/C2	HNRNPC
NaN	NaN	NaN	NaN	NaN	NaN	-0.774009	-0.62069	-0.858803	NaN	-0.847985	-1.81107			+		biological regulation;cell proliferation;cellular component biogenesis;cellular component biogenesis at cellular level;cellular component organization;cellular component organization at cellular level;cellular component organization or biogenesis;cellular component organization or biogenesis at cellular level;cellular localization;cellular macromolecule localization;cellular macromolecule metabol…	binding;ribonucleoprotein binding	cell part;chromosome;condensed chromosome;cytoplasm;intracellular membrane-bounded organelle;intracellular non-membrane-bounded organelle;intracellular organelle;intracellular organelle part;intracellular part;macromolecular complex;membrane;membrane-bounded organelle;non-membrane-bounded organelle;nuclear part;nucleolar part;nucleolus;nucleoplasm;nucleus;organelle;organelle part;PeBoW complex;pr…	BRCT;Pescadillo_N		4	4	4	9.8	9.8	9.8	51.464	6.4384	23353000	15695000	7658500	0	NaN	0	NaN	2.17816	-0.851167	0.68435	-1.42953	B3KXD6;B5MCF9;O00541-2;O00541;H7BYY8	B3KXD6;B5MCF9;O00541-2;O00541	Pescadillo homolog	PES1
NaN	NaN	NaN	NaN	NaN	NaN	NaN	NaN	NaN	NaN	NaN	NaN					anatomical structure morphogenesis;cell part morphogenesis;cellular component morphogenesis;cellular component organization;cellular component organization at cellular level;cellular component organization or biogenesis;cellular component organization or biogenesis at cellular level;cellular developmental process;cellular process;developmental process;mitochondrion morphogenesis;mitochondrion org…	binding;DNA binding;nucleic acid binding	cell part;cytoplasmic part;intracellular membrane-bounded organelle;intracellular non-membrane-bounded organelle;intracellular organelle;intracellular organelle part;intracellular part;membrane-bounded organelle;mitochondrial nucleoid;mitochondrial part;mitochondrion;non-membrane-bounded organelle;nucleoid;nucleus;organelle;organelle part	DUF525		1	1	1	3.4	3.4	3.4	39.871	2.8438	5583500	846270	4737300	0	NaN	0	NaN	0	NaN	0	NaN	B4DEM9;Q9Y2S7	B4DEM9;Q9Y2S7	Polymerase delta-interacting protein 2	POLDIP2
NaN	NaN	NaN	NaN	NaN	NaN	-1.09576	NaN	NaN	NaN	NaN	NaN					anatomical structure development;ATP-dependent chromatin remodeling;biological regulation;cellular component disassembly;cellular component disassembly at cellular level;cellular component organization;cellular component organization at cellular level;cellular component organization or biogenesis;cellular component organization or biogenesis at cellular level;cellular macromolecular complex disas…	acetyltransferase activity;binding;catalytic activity;chromatin binding;DNA binding;ligand-dependent nuclear receptor binding;N-acetyltransferase activity;N-acyltransferase activity;nucleic acid binding;protein binding;protein binding transcription factor activity;protein N-terminus binding;receptor binding;RNA binding;transcription coactivator activity;transcription cofactor activity;transcripti…	cell part;chromatin;chromatin remodeling complex;chromosomal part;chromosome;intracellular membrane-bounded organelle;intracellular non-membrane-bounded organelle;intracellular organelle;intracellular organelle part;intracellular part;macromolecular complex;membrane-bounded organelle;nBAF complex;non-membrane-bounded organelle;npBAF complex;nuclear chromatin;nuclear chromosome;nuclear chromosome …	GCN5L1;HMG_box		3	3	3	11.5	11.5	11.5	33.433	8.2362	20209000	13768000	6441600	0	NaN	0	NaN	0	-1.19576	0	NaN	J3QKS7;B4DGM3;Q969G3-2;Q969G3;J3QR61;Q969G3-6;Q969G3-5;Q969G3-3;Q969G3-4;J3KS99;J3QL66;J3KT85;J3QKX6;H7C048;K7EMQ8	J3QKS7;B4DGM3;Q969G3-2;Q969G3;J3QR61;Q969G3-6;Q969G3-5;Q969G3-3;Q969G3-4	SWI/SNF-related matrix-associated actin-dependent regulator of chromatin subfamily E member 1	SMARCE1
NaN	0.975924	NaN	NaN	NaN	NaN	-0.0263961	0.113167	-0.0483824	0.171719	0.466653	0.313014					adherens junction assembly;adherens junction organization;anatomical structure development;anatomical structure formation involved in morphogenesis;anatomical structure homeostasis;anatomical structure morphogenesis;androgen receptor signaling pathway;anterior/posterior axis specification;apoptosis;appendage morphogenesis;axis specification;biological adhesion;biological regulation;biosynthetic p…	activating transcription factor binding;alpha-catenin binding;androgen receptor binding;binding;cadherin binding;cell adhesion molecule binding;DNA binding;double-stranded DNA binding;enzyme binding;estrogen receptor binding;hormone receptor binding;ion channel binding;I-SMAD binding;kinase binding;molecular transducer activity;nuclear hormone receptor binding;nucleic acid binding;nucleic acid bi…	adherens junction;anchoring junction;apical part of cell;basolateral plasma membrane;beta-catenin destruction complex;beta-catenin-TCF7L2 complex;catenin complex;catenin-TCF7L2 complex;cell cortex;cell junction;cell part;cell periphery;cell projection;cell projection membrane;cell projection part;cell-cell adherens junction;cell-cell junction;cell-substrate adherens junction;cell-substrate juncti…	Arm	Adherens junction;Arrhythmogenic right ventricular cardiomyopathy (ARVC);Bacterial invasion of epithelial cells;Basal cell carcinoma;Colorectal cancer;Endometrial cancer;Focal adhesion;Leukocyte transendothelial migration;Melanogenesis;Pathogenic Escherichia coli infection;Pathways in cancer;Prostate cancer;Thyroid cancer;Tight junction;Wnt signaling pathway	11	8	8	19	13.8	13.8	84.765	50.275	43369000	21230000	22139000	0	0.875924	0	NaN	0.644228	-0.0872038	0.901268	0.217129	B4DGU4;P35222	B4DGU4;P35222	Catenin beta-1	CTNNB1
NaN	0.0943712	NaN	NaN	NaN	NaN	NaN	NaN	NaN	NaN	NaN	NaN					anatomical structure development;cell development;cell differentiation;cellular developmental process;cellular process;developmental process;epithelial cell differentiation;nervous system development;response to chemical stimulus;response to endogenous stimulus;response to hormone stimulus;response to organic substance;response to stimulus;stem cell development;system development	binding;nucleic acid binding;nucleotide binding;poly(U) RNA binding;poly-pyrimidine tract binding;RNA binding;single-stranded RNA binding	cell part;cytoplasm;intracellular membrane-bounded organelle;intracellular organelle;intracellular part;macromolecular complex;membrane-bounded organelle;nucleus;organelle;polysome;ribonucleoprotein complex	RRM_1	mRNA surveillance pathway	2	2	2	16.3	16.3	16.3	15.573	3.7937	3364200	1413200	1951000	0	-0.00562877	0	NaN	0	NaN	0	NaN	J3KTC1;B4DHE8;Q96DH6-2;Q96DH6;J3QKT5;H0YHB7;B4DM51;Q96DH6-3;O43347	J3KTC1;B4DHE8;Q96DH6-2;Q96DH6;J3QKT5;H0YHB7;B4DM51;Q96DH6-3;O43347	RNA-binding protein Musashi homolog 2;RNA-binding protein Musashi homolog 1	MSI2;MSI1
NaN	NaN	NaN	NaN	NaN	NaN	NaN	NaN	1.57129	NaN	NaN	NaN					apoptotic mitochondrial changes;ATP metabolic process;ATP synthesis coupled electron transport;biological regulation;cellular chemical homeostasis;cellular component organization;cellular component organization at cellular level;cellular component organization or biogenesis;cellular component organization or biogenesis at cellular level;cellular homeostasis;cellular ion homeostasis;cellular metab…	2 iron, 2 sulfur cluster binding;4 iron, 4 sulfur cluster binding;binding;catalytic activity;cation binding;electron carrier activity;ion binding;iron-sulfur cluster binding;metal cluster binding;metal ion binding;NADH dehydrogenase (quinone) activity;NADH dehydrogenase (ubiquinone) activity;NADH dehydrogenase activity;oxidoreductase activity;oxidoreductase activity, acting on NADH or NADPH;oxido…	cell part;cytoplasmic part;intracellular membrane-bounded organelle;intracellular organelle;intracellular organelle part;intracellular part;macromolecular complex;membrane;membrane part;membrane-bounded organelle;membrane-enclosed lumen;mitochondrial inner membrane;mitochondrial intermembrane space;mitochondrial membrane;mitochondrial membrane part;mitochondrial part;mitochondrial respiratory cha…	DUF1982;Molybdopterin;NADH-G_4Fe-4S_3	Alzheimer's disease;Huntington's disease;Oxidative phosphorylation;Parkinson's disease	2	2	2	4.3	4.3	4.3	66.921	8.7582	6894900	2237500	4657400	0	NaN	0	NaN	0	1.47129	0	NaN	B4DJ81;P28331-3;P28331-4;P28331-5;P28331;P28331-2	B4DJ81;P28331-3;P28331-4;P28331-5;P28331;P28331-2	NADH-ubiquinone oxidoreductase 75 kDa subunit, mitochondrial	NDUFS1
NaN	0.309991	NaN	NaN	NaN	NaN	NaN	NaN	NaN	NaN	NaN	NaN					biological regulation;biosynthetic process;cellular biosynthetic process;cellular component assembly;cellular component assembly at cellular level;cellular component organization;cellular component organization at cellular level;cellular component organization or biogenesis;cellular component organization or biogenesis at cellular level;cellular macromolecular complex assembly;cellular macromolec…	binding;nucleic acid binding;nucleotide binding	cell part;cytoplasm;intracellular membrane-bounded organelle;intracellular non-membrane-bounded organelle;intracellular organelle;intracellular organelle part;intracellular part;membrane-bounded organelle;non-membrane-bounded organelle;nuclear body;nuclear part;nuclear speck;nucleolus;nucleoplasm;nucleoplasm part;nucleus;organelle;organelle part	RRM_1	Spliceosome	2	1	1	16.9	9.7	9.7	14.437	5.3499	2459100	1040000	1419100	0	0.209991	0	NaN	0	NaN	0	NaN	B4DJK0;B4DUA4;Q13243-3;Q13243;G3V5K8;Q13243-2	B4DJK0;B4DUA4;Q13243-3;Q13243;G3V5K8;Q13243-2	Serine/arginine-rich splicing factor 5	SRSF5
NaN	0.834873	NaN	NaN	NaN	NaN	NaN	NaN	NaN	NaN	NaN	NaN					alcohol biosynthetic process;alcohol metabolic process;amine catabolic process;amine metabolic process;biosynthetic process;carbohydrate biosynthetic process;carbohydrate metabolic process;carboxylic acid catabolic process;carboxylic acid metabolic process;carboxylic acid transport;catabolic process;cellular amine metabolic process;cellular amino acid catabolic process;cellular amino acid metabol…	carboxylic acid transmembrane transporter activity;dicarboxylic acid transmembrane transporter activity;organic acid transmembrane transporter activity;structural constituent of ribosome;structural molecule activity;substrate-specific transmembrane transporter activity;substrate-specific transporter activity;transmembrane transporter activity;transporter activity	cell part;cytoplasmic part;integral to membrane;intracellular membrane-bounded organelle;intracellular non-membrane-bounded organelle;intracellular organelle;intracellular organelle part;intracellular part;intrinsic to membrane;macromolecular complex;membrane;membrane part;membrane-bounded organelle;mitochondrial inner membrane;mitochondrial membrane;mitochondrial part;mitochondrion;non-membrane-…	Mito_carr;Ribosomal_L12	Proximal tubule bicarbonate reclamation	4	4	2	13.1	13.1	5.2	48.099	4.8746	6198200	2334400	3863800	0	0.734873	0	NaN	0	NaN	0	NaN	B4DLN1;Q9UBX3;Q9UBX3-2	B4DLN1;Q9UBX3;Q9UBX3-2	Mitochondrial dicarboxylate carrier	SLC25A10
-0.0138148	1.86283	1.62672	NaN	NaN	NaN	NaN	NaN	NaN	NaN	NaN	NaN					antigen processing and presentation;antigen processing and presentation of exogenous antigen;antigen processing and presentation of exogenous peptide antigen;antigen processing and presentation of exogenous peptide antigen via MHC class I;antigen processing and presentation of exogenous peptide antigen via MHC class I, TAP-dependent;antigen processing and presentation of peptide antigen;antigen p…	binding;ribonucleoprotein binding;ribosome binding	cell part;cytoplasmic part;cytosol;endoplasmic reticulum;endoplasmic reticulum membrane;endoplasmic reticulum part;integral to endoplasmic reticulum membrane;integral to membrane;integral to organelle membrane;intracellular membrane-bounded organelle;intracellular organelle;intracellular organelle part;intracellular part;intrinsic to endoplasmic reticulum membrane;intrinsic to membrane;intrinsic …	Plug_translocon;SecY	Phagosome;Protein export;Protein processing in endoplasmic reticulum;Vibrio cholerae infection	4	4	4	7.5	7.5	7.5	52.949	5.2088	9475500	2840500	6635000	0.668146	1.05858	0	NaN	0	NaN	0	NaN	B4DR61;P61619;P61619-3;F8W776;Q8TC24;Q9H9S3-2;Q9H9S3-3;Q9H9S3;H7C1Q9;C9JXC6;H7C069;A6NK38;F2Z2C7;A6NIF9;C9JJV4;H7C1S8	B4DR61;P61619;P61619-3;F8W776;Q8TC24;Q9H9S3-2;Q9H9S3-3;Q9H9S3	Protein transport protein Sec61 subunit alpha isoform 1;Protein transport protein Sec61 subunit alpha isoform 2	SEC61A1;SEC61A2
NaN	NaN	2.68077	1.88194	2.50792	1.96831	1.94845	NaN	2.61791	1.80966	1.94373	NaN					actin cytoskeleton organization;actin cytoskeleton reorganization;actin filament-based process;activation of signaling protein activity involved in unfolded protein response;biological regulation;blood coagulation;cell activation;cell surface receptor linked signaling pathway;cellular component organization;cellular component organization at cellular level;cellular component organization or bioge…	binding;catalytic activity;cation binding;enzyme binding;ephrin receptor binding;hydrolase activity;hydrolase activity, acting on ester bonds;ion binding;kinase binding;metal ion binding;phosphatase activity;phosphoprotein phosphatase activity;phosphoric ester hydrolase activity;protein binding;protein kinase binding;protein tyrosine phosphatase activity;receptor binding;receptor tyrosine kinase …	cell part;cytoplasmic part;cytoplasmic vesicle;cytosol;early endosome;endoplasmic reticulum;endosome;intracellular membrane-bounded organelle;intracellular organelle;intracellular part;membrane-bounded organelle;organelle;vesicle	Y_phosphatase	Adherens junction;Insulin signaling pathway	4	4	4	13.3	13.3	13.3	41.26	53.505	33025000	5569800	27456000	0	2.58077	2.03263	2.01939	1.01388	2.18318	1.61963	1.7767	B4DSN5;P18031	B4DSN5;P18031	Tyrosine-protein phosphatase non-receptor type;Tyrosine-protein phosphatase non-receptor type 1	PTPN1
0.419862	0.00992034	0.448901	0.762731	0.892585	0.958583	1.75189	1.72901	1.76964	0.733441	0.871213	0.739762			+	+	binding of sperm to zona pellucida;cell recognition;cell-cell recognition;cellular component assembly;cellular component assembly at cellular level;cellular component organization;cellular component organization at cellular level;cellular component organization or biogenesis;cellular component organization or biogenesis at cellular level;cellular macromolecule metabolic process;cellular metabolic…	adenyl nucleotide binding;adenyl ribonucleotide binding;ATP binding;binding;nucleotide binding;protein binding;purine nucleotide binding;purine ribonucleoside triphosphate binding;purine ribonucleotide binding;ribonucleotide binding;unfolded protein binding	cell body;cell part;chaperonin-containing T-complex;cytoplasm;cytoplasmic part;cytoskeletal part;cytoskeleton;cytosol;cytosolic part;extracellular membrane-bounded organelle;extracellular organelle;extracellular region part;extracellular vesicular exosome;intracellular non-membrane-bounded organelle;intracellular organelle;intracellular organelle part;intracellular part;macromolecular complex;mem…	Cpn60_TCP1		16	16	16	38.4	38.4	38.4	55.674	47.665	161150000	57378000	103780000	0.513439	0.192895	2.25826	0.7713	4.29416	1.65018	2.36507	0.681472	B4DUR8;P49368;P49368-2;Q5SZX6;E9PRC8;E9PQ35;Q5SZX9;Q5SZW8	B4DUR8;P49368;P49368-2	T-complex protein 1 subunit gamma	CCT3
-0.147554	-0.275245	-0.353174	-0.333752	-0.40276	-0.207228	-0.723706	-0.70776	-0.628921	-0.914793	-0.777072	-0.780562			+	+	biological regulation;biosynthetic process;cellular biosynthetic process;cellular macromolecule biosynthetic process;cellular macromolecule metabolic process;cellular metabolic process;cellular nitrogen compound metabolic process;cellular process;immune response;immune system process;macromolecule biosynthetic process;macromolecule metabolic process;metabolic process;nitrogen compound metabolic p…	adenyl nucleotide binding;adenyl ribonucleotide binding;ATP binding;binding;catalytic activity;DNA binding;double-stranded RNA binding;nucleic acid binding;nucleotide binding;purine nucleotide binding;purine ribonucleoside triphosphate binding;purine ribonucleotide binding;ribonucleotide binding;RNA binding;transferase activity	cell part;cytoplasm;intracellular membrane-bounded organelle;intracellular non-membrane-bounded organelle;intracellular organelle;intracellular organelle part;intracellular part;macromolecular complex;membrane;membrane-bounded organelle;non-membrane-bounded organelle;nuclear part;nucleolus;nucleoplasm;nucleus;organelle;organelle part;ribonucleoprotein complex	DZF		18	18	18	61.4	61.4	61.4	38.91	145.72	1420800000	897750000	523000000	1.57175	-0.358657	1.73183	-0.41458	2.85885	-0.786796	2.62015	-0.924142	B4DY09;Q12905;X6R6Z1;A0A0A0MRL0	B4DY09;Q12905	Interleukin enhancer-binding factor 2	ILF2
NaN	NaN	NaN	NaN	NaN	NaN	2.56847	3.06271	2.87784	2.15931	NaN	NaN			+		biological regulation;catabolic process;cellular catabolic process;cellular macromolecule catabolic process;cellular macromolecule metabolic process;cellular metabolic process;cellular process;cellular response to chemical stimulus;cellular response to organic substance;cellular response to stimulus;cellular response to stress;cellular response to topologically incorrect protein;cellular response…	binding;enzyme binding;MHC class I protein binding;MHC protein binding;protease binding;protein binding;receptor activity;receptor binding	cell part;cytoplasmic part;cytoplasmic ubiquitin ligase complex;early endosome;endoplasmic reticulum;endoplasmic reticulum part;endosome;ER ubiquitin ligase complex;Hrd1p ubiquitin ligase complex;integral to endoplasmic reticulum membrane;integral to membrane;integral to organelle membrane;intracellular membrane-bounded organelle;intracellular organelle;intracellular organelle part;intracellular …	DER1	Amyotrophic lateral sclerosis (ALS);Protein processing in endoplasmic reticulum	3	3	3	21.9	21.9	21.9	17.033	4.8946	15868000	2336500	13532000	0	NaN	0	NaN	2.55836	2.73634	0	2.05931	B4E1G1;Q9BUN8-2;Q9BUN8;E5RGY0	B4E1G1;Q9BUN8-2;Q9BUN8	Derlin-1	DERL1
NaN	NaN	NaN	NaN	NaN	NaN	NaN	NaN	NaN	NaN	NaN	NaN					biological regulation;cell cycle;cell cycle phase;cell cycle process;cell division;cellular component organization;cellular component organization at cellular level;cellular component organization or biogenesis;cellular component organization or biogenesis at cellular level;cellular macromolecule metabolic process;cellular metabolic process;cellular nitrogen compound metabolic process;cellular pr…	binding;chromatin binding	cell part;chromatin;chromosomal part;chromosome;chromosome, centromeric region;cohesin complex;cytoplasm;cytoplasmic part;cytosol;intracellular membrane-bounded organelle;intracellular non-membrane-bounded organelle;intracellular organelle;intracellular organelle part;intracellular part;macromolecular complex;membrane;membrane-bounded organelle;non-membrane-bounded organelle;nuclear chromatin;nuc…	Sororin		1	1	1	4.6	4.6	4.6	33.734	4.5035	1496500	1036500	460050	0	NaN	0	NaN	0	NaN	0	NaN	B5MBX0;Q96FF9	B5MBX0;Q96FF9	Sororin	CDCA5
NaN	NaN	NaN	NaN	NaN	NaN	NaN	NaN	NaN	NaN	NaN	NaN					biological regulation;biosynthetic process;carbohydrate metabolic process;cellular biosynthetic process;cellular carbohydrate metabolic process;cellular component organization;cellular component organization at cellular level;cellular component organization or biogenesis;cellular component organization or biogenesis at cellular level;cellular macromolecule biosynthetic process;cellular macromolec…	binding;DNA binding;nucleic acid binding	cell part;cytoplasmic part;endoplasmic reticulum membrane;endoplasmic reticulum part;Golgi apparatus part;Golgi membrane;integral to membrane;intracellular membrane-bounded organelle;intracellular organelle;intracellular organelle part;intracellular part;intrinsic to membrane;membrane;membrane part;membrane-bounded organelle;nucleus;organelle;organelle membrane;organelle part	WD40	Protein processing in endoplasmic reticulum	1	1	1	5	5	5	38.939	5.0398	505590	0	505590	0	NaN	0	NaN	0	NaN	0	NaN	B5MC98;Q9HCU5	B5MC98;Q9HCU5	Prolactin regulatory element-binding protein	PREB
-0.318038	-0.424843	-1.15849	-1.36231	NaN	0.0713507	NaN	-0.906494	-0.393027	-1.56226	-0.904116	-1.03086					actin cytoskeleton organization;actin filament-based process;anatomical structure development;androgen receptor signaling pathway;biological regulation;cell cycle phase;cell cycle process;cell development;cell division;cellular component organization;cellular component organization at cellular level;cellular component organization or biogenesis;cellular component organization or biogenesis at cel…	androgen receptor binding;binding;catalytic activity;chromatin binding;GDP binding;GTP binding;GTPase activity;guanyl nucleotide binding;guanyl ribonucleotide binding;hormone receptor binding;hydrolase activity;hydrolase activity, acting on acid anhydrides;hydrolase activity, acting on acid anhydrides, in phosphorus-containing anhydrides;nuclear hormone receptor binding;nucleoside-triphosphatase …	cell part;centriole;cytoplasm;cytoplasmic membrane-bounded vesicle;cytoplasmic part;cytoplasmic vesicle;cytoskeletal part;cytosol;endosome;extracellular membrane-bounded organelle;extracellular organelle;extracellular region part;extracellular vesicular exosome;intracellular;intracellular membrane-bounded organelle;intracellular non-membrane-bounded organelle;intracellular organelle;intracellular…	Ras	Ribosome biogenesis in eukaryotes;RNA transport	7	7	7	30.5	30.5	30.5	26.224	22.972	171400000	108490000	62914000	0.96321	-0.733791	0.312	-0.745478	0.677729	-0.749761	1.61184	-1.26574	B5MDF5;P62826;J3KQE5;F5H018;H0YFC6;B4DV51;A0A087X0W0	B5MDF5;P62826;J3KQE5;F5H018	GTP-binding nuclear protein Ran	RAN
NaN	NaN	NaN	NaN	-0.33448	-0.445166	0.741661	0.482022	0.689746	0.809661	1.05109	NaN					biological regulation;biosynthetic process;cellular biosynthetic process;cellular component assembly;cellular component assembly at cellular level;cellular component organization;cellular component organization at cellular level;cellular component organization or biogenesis;cellular component organization or biogenesis at cellular level;cellular macromolecular complex assembly;cellular macromolec…	binding;nucleic acid binding;RNA binding;translation factor activity, nucleic acid binding;translation initiation factor activity	cell part;cytoplasmic part;cytosol;eukaryotic 43S preinitiation complex;eukaryotic 48S preinitiation complex;eukaryotic translation initiation factor 3 complex;intracellular part;macromolecular complex;protein complex;ribonucleoprotein complex;translation preinitiation complex	eIF-3c_N;PCI	RNA transport	8	8	8	9.6	9.6	9.6	104.1	24.552	31487000	13488000	17999000	0	NaN	1.14493	-0.489823	1.67636	0.53781	1.03666	0.830377	Q99613-2;Q99613;B5ME19;H3BPE4	Q99613-2;Q99613;B5ME19	Eukaryotic translation initiation factor 3 subunit C;Eukaryotic translation initiation factor 3 subunit C-like protein	EIF3C;EIF3CL
NaN	NaN	NaN	NaN	5.87794	NaN	NaN	NaN	NaN	NaN	NaN	NaN							cell part;integral to membrane;intrinsic to membrane;membrane part			2	2	2	30.2	30.2	30.2	7.3436	4.6447	10762000	407470	10354000	0	NaN	0	5.77794	0	NaN	0	NaN	M0R0R3;M0R2G5;B7WNH4;Q9BQ49;E9PP42;E9PNA8;E9PLH2;M0QYU9	M0R0R3;M0R2G5;B7WNH4;Q9BQ49;E9PP42;E9PNA8;E9PLH2;M0QYU9	Small integral membrane protein 7	SMIM7
NaN	NaN	NaN	NaN	NaN	NaN	NaN	NaN	NaN	NaN	NaN	NaN					ATP biosynthetic process;ATP hydrolysis coupled proton transport;ATP metabolic process;ATP synthesis coupled proton transport;biological regulation;biosynthetic process;cation homeostasis;cation transport;cell surface receptor linked signaling pathway;cellular biosynthetic process;cellular cation homeostasis;cellular chemical homeostasis;cellular component assembly;cellular component assembly at …	active transmembrane transporter activity;ATPase activity;ATPase activity, coupled;ATPase activity, coupled to movement of substances;ATPase activity, coupled to transmembrane movement of ions;ATPase activity, coupled to transmembrane movement of substances;ATPase binding;binding;catalytic activity;cation transmembrane transporter activity;cation-transporting ATPase activity;enzyme binding;hydrog…	cell part;cytoplasm;cytoplasmic membrane-bounded vesicle;cytoplasmic part;cytoplasmic vesicle;cytoplasmic vesicle membrane;cytoplasmic vesicle part;endocytic vesicle membrane;endosomal part;endosome membrane;extracellular membrane-bounded organelle;extracellular organelle;extracellular region part;extracellular vesicular exosome;Golgi apparatus;integral to membrane;intracellular membrane-bounded …	V_ATPase_I	Collecting duct acid secretion;Epithelial cell signaling in Helicobacter pylori infection;ko05152;Lysosome;Oxidative phosphorylation;Phagosome;Rheumatoid arthritis;Vibrio cholerae infection	2	2	2	2.9	2.9	2.9	90.499	3.293	1111600	666990	444630	0	NaN	0	NaN	0	NaN	0	NaN	B7Z641;B7Z2A9;Q93050-1;Q93050;Q93050-3;K7EQW2;K7ELZ6;K7EM24;F5H1T6	B7Z641;B7Z2A9;Q93050-1;Q93050;Q93050-3;K7EQW2;K7ELZ6;K7EM24;F5H1T6	V-type proton ATPase subunit a;V-type proton ATPase 116 kDa subunit a isoform 1	ATP6V0A1
NaN	NaN	NaN	NaN	NaN	NaN	NaN	NaN	NaN	NaN	NaN	NaN					cellular component organization;cellular component organization at cellular level;cellular component organization or biogenesis;cellular component organization or biogenesis at cellular level;cellular macromolecule metabolic process;cellular metabolic process;cellular process;cellular protein metabolic process;chromatin modification;chromatin organization;chromosome organization;covalent chromati…	binding;carboxypeptidase activity;catalytic activity;cation binding;exopeptidase activity;hydrolase activity;ion binding;metal ion binding;metallocarboxypeptidase activity;metalloexopeptidase activity;metallopeptidase activity;peptidase activity;peptidase activity, acting on L-amino acid peptides;transition metal ion binding;zinc ion binding	extracellular region	Peptidase_M14;Propep_M14		3	3	3	7.9	7.9	7.9	35.634	2.7169	1388400	1388400	0	0	NaN	0	NaN	0	NaN	0	NaN	B7Z5J4;Q9UI42-2;Q9UI42	B7Z5J4;Q9UI42-2;Q9UI42	Carboxypeptidase A4	CPA4
NaN	NaN	NaN	NaN	NaN	NaN	NaN	NaN	NaN	NaN	NaN	NaN					activation of caspase activity;activin receptor signaling pathway;anatomical structure development;anatomical structure formation involved in morphogenesis;anatomical structure morphogenesis;anatomical structure regression;anterior/posterior pattern specification;avoidance of defenses of other organism involved in symbiotic interaction;avoidance of host defenses;axis specification;biological regu…	activating transcription factor binding;beta-catenin binding;bHLH transcription factor binding;binding;cation binding;chromatin binding;chromatin DNA binding;core promoter proximal region DNA binding;core promoter proximal region sequence-specific DNA binding;co-SMAD binding;cytokine receptor binding;DNA binding;double-stranded DNA binding;enhancer binding;enzyme binding;identical protein binding…	activin responsive factor complex;cell part;chromatin;chromosomal part;cytoplasm;cytoplasmic part;cytosol;intracellular;intracellular membrane-bounded organelle;intracellular organelle;intracellular organelle part;intracellular part;macromolecular complex;membrane;membrane-bounded organelle;nuclear chromatin;nuclear chromosome part;nuclear inner membrane;nuclear membrane;nuclear part;nucleoplasm;…	MH1;MH2	Adherens junction;Cell cycle;Chagas disease (American trypanosomiasis);Colorectal cancer;Endocytosis;Pancreatic cancer;Pathways in cancer;TGF-beta signaling pathway;Wnt signaling pathway	1	1	1	20.6	20.6	20.6	7.3142	3.6783	213610	109720	103890	0	NaN	0	NaN	0	NaN	0	NaN	H0YMP2;H0YL71;H3BP09;H3BVD1;K7EJX0;B7Z5N5;P84022-3;P84022-2;P84022;O15198-2;Q15796-2;Q15796;O15198	H0YMP2;H0YL71;H3BP09;H3BVD1;K7EJX0;B7Z5N5;P84022-3;P84022-2;P84022;O15198-2;Q15796-2;Q15796;O15198	Mothers against decapentaplegic homolog;Mothers against decapentaplegic homolog 3;Mothers against decapentaplegic homolog 9;Mothers against decapentaplegic homolog 2	SMAD3;SMAD2;SMAD9
NaN	NaN	NaN	NaN	NaN	NaN	-1.07683	-0.980711	-0.853345	-0.853267	-0.887927	-0.938818			+	+	cellular macromolecule metabolic process;cellular metabolic process;cellular nitrogen compound metabolic process;cellular process;macromolecule metabolic process;metabolic process;nitrogen compound metabolic process;nucleic acid metabolic process;nucleobase-containing compound metabolic process;primary metabolic process;RNA metabolic process;RNA secondary structure unwinding	adenyl nucleotide binding;adenyl ribonucleotide binding;ATP binding;ATPase activity;ATPase activity, coupled;ATP-dependent helicase activity;ATP-dependent RNA helicase activity;binding;catalytic activity;helicase activity;hydrolase activity;hydrolase activity, acting on acid anhydrides;hydrolase activity, acting on acid anhydrides, in phosphorus-containing anhydrides;nucleic acid binding;nucleosi…	cell part;cytoplasm;intracellular non-membrane-bounded organelle;intracellular organelle;intracellular organelle part;intracellular part;non-membrane-bounded organelle;nuclear part;nucleolus;organelle;organelle part	DEAD;Helicase_C		6	6	6	8.2	8.2	8.2	86.604	16.426	13097000	8582200	4515200	0	NaN	0	NaN	2.43925	-1.07029	3.20415	-0.993337	B7Z6D5;Q96GQ7;A0A087X059	B7Z6D5;Q96GQ7;A0A087X059	Probable ATP-dependent RNA helicase DDX27	DDX27
NaN	NaN	0.587269	NaN	NaN	NaN	NaN	-0.0118061	NaN	0.9489	1.39824	NaN					biological regulation;biosynthetic process;cellular biosynthetic process;cellular component assembly;cellular component assembly at cellular level;cellular component organization;cellular component organization at cellular level;cellular component organization or biogenesis;cellular component organization or biogenesis at cellular level;cellular macromolecular complex assembly;cellular macromolec…		cell part;cytoplasmic membrane-bounded vesicle;cytoplasmic part;cytoplasmic vesicle;intracellular membrane-bounded organelle;intracellular organelle;intracellular part;melanosome;membrane;membrane-bounded organelle;membrane-bounded vesicle;nucleus;organelle;pigment granule;vesicle	NAP		4	4	3	28.3	28.3	23.2	23.417	6.839	31934000	13243000	18691000	0	0.487269	0	NaN	0	-0.111806	0.881627	1.07357	H0YHC3;F8W020;F8W118;F8VXI6;F8VUX1;F8VY35;F8VV59;B7Z9C2;F8W0J6;F5H4R6;H0YIV4;P55209-3;P55209-2;P55209;F8VRJ2;H0YH88;F8W543;F8VVB5;E9PNW0;E9PJJ2;E9PS34;E9PNJ7	H0YHC3;F8W020;F8W118;F8VXI6;F8VUX1;F8VY35;F8VV59;B7Z9C2;F8W0J6;F5H4R6;H0YIV4;P55209-3;P55209-2;P55209;F8VRJ2;H0YH88;F8W543;F8VVB5	Nucleosome assembly protein 1-like 1	NAP1L1
NaN	0.543397	NaN	NaN	NaN	NaN	NaN	NaN	NaN	NaN	NaN	NaN					amine biosynthetic process;amine metabolic process;anatomical structure development;betaine biosynthetic process;betaine metabolic process;biological regulation;biosynthetic process;carbohydrate biosynthetic process;carbohydrate metabolic process;carboxylic acid biosynthetic process;carboxylic acid catabolic process;carboxylic acid metabolic process;cardiac cell differentiation;cardiac muscle cel…	acyl-CoA dehydrogenase activity;binding;catalytic activity;coenzyme binding;cofactor binding;flavin adenine dinucleotide binding;identical protein binding;medium-chain-acyl-CoA dehydrogenase activity;oxidoreductase activity;oxidoreductase activity, acting on the CH-CH group of donors;protein binding	axon;cell part;cell projection;cytoplasmic part;extracellular membrane-bounded organelle;extracellular organelle;extracellular region part;extracellular vesicular exosome;intracellular membrane-bounded organelle;intracellular organelle;intracellular organelle lumen;intracellular organelle part;intracellular part;membrane-bounded organelle;membrane-bounded vesicle;membrane-enclosed lumen;mitochond…	Acyl-CoA_dh_1;Acyl-CoA_dh_M;Acyl-CoA_dh_N	beta-Alanine metabolism;Fatty acid metabolism;PPAR signaling pathway;Propanoate metabolism;Valine, leucine and isoleucine degradation	2	2	2	6.2	6.2	6.2	42.426	3.8994	4576600	2020900	2555600	0	0.443397	0	NaN	0	NaN	0	NaN	B7Z9I1;Q5T4U5;P11310;P11310-2;E9PRX4;E9PJM9	B7Z9I1;Q5T4U5;P11310;P11310-2;E9PRX4;E9PJM9	Medium-chain specific acyl-CoA dehydrogenase, mitochondrial	ACADM
NaN	NaN	NaN	NaN	NaN	NaN	-0.694251	-1.11704	-0.506455	NaN	NaN	-1.4875					catabolic process;cellular catabolic process;cellular macromolecule catabolic process;cellular macromolecule metabolic process;cellular metabolic process;cellular nitrogen compound metabolic process;cellular process;exonucleolytic nuclear-transcribed mRNA catabolic process involved in deadenylation-dependent decay;gene expression;macromolecule catabolic process;macromolecule metabolic process;met…	binding;nucleic acid binding;RNA binding	cell part;cytoplasmic part;cytosol;intracellular membrane-bounded organelle;intracellular organelle;intracellular organelle part;intracellular part;macromolecular complex;membrane-bounded organelle;nuclear part;nucleus;organelle;organelle part;ribonucleoprotein complex;spliceosomal complex	LSM	RNA degradation;Spliceosome	1	1	1	29.7	29.7	29.7	7.0202	6.992	6855400	4869600	1985800	0	NaN	0	NaN	1.39523	-0.872581	0	-1.5875	B8ZZF8;Q9Y4Y9	B8ZZF8;Q9Y4Y9	U6 snRNA-associated Sm-like protein LSm5	LSM5
NaN	NaN	NaN	NaN	NaN	NaN	NaN	NaN	NaN	NaN	NaN	NaN					activation of caspase activity;biological regulation;cell differentiation;cellular developmental process;cellular macromolecule metabolic process;cellular metabolic process;cellular process;cellular protein metabolic process;developmental process;macromolecule metabolic process;metabolic process;osteoblast differentiation;positive regulation of caspase activity;positive regulation of catalytic ac…	adenyl nucleotide binding;adenyl ribonucleotide binding;ATP binding;binding;chaperone binding;nucleotide binding;protein binding;purine nucleotide binding;purine ribonucleoside triphosphate binding;purine ribonucleotide binding;ribonucleotide binding;unfolded protein binding	cell part;cytoplasm;cytoplasmic part;extracellular membrane-bounded organelle;extracellular organelle;extracellular region part;extracellular vesicular exosome;intracellular membrane-bounded organelle;intracellular organelle;intracellular organelle lumen;intracellular organelle part;intracellular part;membrane;membrane-bounded organelle;membrane-bounded vesicle;membrane-enclosed lumen;mitochondri…	Cpn10;Mob1_phocein		2	2	2	23.8	23.8	23.8	10.689	3.596	2437900	1923800	514060	0	NaN	0	NaN	0	NaN	0	NaN	B8ZZL8;P61604;B8ZZ54;S4R3N1	B8ZZL8;P61604;B8ZZ54;S4R3N1	10 kDa heat shock protein, mitochondrial	HSPE1;HSPE1-MOB4
NaN	NaN	NaN	NaN	NaN	NaN	NaN	NaN	NaN	NaN	NaN	-2.0238					biosynthetic process;cellular biosynthetic process;cellular macromolecule biosynthetic process;cellular macromolecule metabolic process;cellular metabolic process;cellular nitrogen compound metabolic process;cellular process;macromolecule biosynthetic process;macromolecule metabolic process;metabolic process;nitrogen compound metabolic process;nucleic acid metabolic process;nucleobase-containing …		cell part;cytoplasm;extracellular membrane-bounded organelle;extracellular organelle;extracellular region part;extracellular vesicular exosome;intracellular membrane-bounded organelle;intracellular organelle;intracellular organelle part;intracellular part;membrane-bounded organelle;membrane-bounded vesicle;nuclear part;nucleoplasm;nucleus;organelle;organelle part;vesicle	Prothymosin		1	1	1	13.1	13.1	13.1	11.758	3.2356	3351600	3165800	185830	0	NaN	0	NaN	0	NaN	0	-2.1238	B8ZZQ6;P06454-2;P06454	B8ZZQ6;P06454-2;P06454	Prothymosin alpha;Prothymosin alpha, N-terminally processed;Thymosin alpha-1	PTMA
NaN	NaN	NaN	NaN	NaN	NaN	NaN	NaN	NaN	NaN	NaN	NaN					biological regulation;biosynthetic process;cellular biosynthetic process;cellular component assembly;cellular component organization;cellular component organization or biogenesis;cellular macromolecule biosynthetic process;cellular macromolecule metabolic process;cellular metabolic process;cellular nitrogen compound metabolic process;cellular process;cellular protein metabolic process;cellular re…	binding;enzyme binding;nucleic acid binding;protein binding;RNA binding;translation elongation factor activity;translation factor activity, nucleic acid binding;ubiquitin protein ligase binding	cell part;Cul2-RING ubiquitin ligase complex;Cul5-RING ubiquitin ligase complex;cullin-RING ubiquitin ligase complex;cytoplasmic part;cytoplasmic ubiquitin ligase complex;cytosol;elongin complex;extracellular membrane-bounded organelle;extracellular organelle;extracellular region part;extracellular vesicular exosome;intracellular organelle part;intracellular part;macromolecular complex;membrane-b…	ubiquitin	Pathways in cancer;Renal cell carcinoma;Ubiquitin mediated proteolysis	2	2	2	22.1	22.1	22.1	12.527	2.1358	2387400	1154000	1233400	0	NaN	0	NaN	0	NaN	0	NaN	B8ZZU8;Q15370;Q15370-2;I3L0M9	B8ZZU8;Q15370;Q15370-2;I3L0M9	Transcription elongation factor B polypeptide 2	TCEB2
NaN	NaN	NaN	NaN	NaN	NaN	NaN	NaN	NaN	NaN	NaN	NaN					cellular macromolecule metabolic process;cellular metabolic process;cellular nitrogen compound metabolic process;cellular process;macromolecule metabolic process;metabolic process;ncRNA metabolic process;ncRNA processing;nitrogen compound metabolic process;nucleic acid metabolic process;nucleobase-containing compound metabolic process;primary metabolic process;RNA metabolic process;RNA processing…	binding;nucleic acid binding;RNA binding;rRNA binding;rRNA primary transcript binding;snoRNA binding	cell part;intracellular non-membrane-bounded organelle;intracellular organelle;intracellular organelle part;intracellular part;macromolecular complex;Mpp10 complex;non-membrane-bounded organelle;nuclear part;nucleolar part;nucleolus;organelle;organelle part;preribosome;protein complex;ribonucleoprotein complex;small-subunit processome	Brix	Ribosome biogenesis in eukaryotes	2	2	2	14	14	14	19.619	3.5979	4501100	1884700	2616400	0	NaN	0	NaN	0	NaN	0	NaN	B9A008;E7ENR5;H0Y714;Q96G21;B8ZZ47	B9A008;E7ENR5;H0Y714;Q96G21;B8ZZ47	U3 small nucleolar ribonucleoprotein protein IMP4	IMP4
0.693052	0.924404	1.81824	1.63821	1.80822	1.58919	1.29608	1.22484	1.32803	1.012	1.014	0.787934			+		biological regulation;calcium ion homeostasis;cation homeostasis;cellular calcium ion homeostasis;cellular cation homeostasis;cellular chemical homeostasis;cellular divalent inorganic cation homeostasis;cellular homeostasis;cellular ion homeostasis;cellular metal ion homeostasis;cellular process;chemical homeostasis;divalent inorganic cation homeostasis;homeostatic process;ion homeostasis;metal i…		cell part;cytoplasmic part;integral to membrane;intracellular membrane-bounded organelle;intracellular organelle;intracellular organelle part;intracellular part;intrinsic to membrane;membrane;membrane part;membrane-bounded organelle;mitochondrial inner membrane;mitochondrial membrane;mitochondrial part;mitochondrion;organelle;organelle inner membrane;organelle membrane;organelle part	Mitofilin		17	17	17	28	28	28	78.973	37.892	134550000	43188000	91357000	1.03174	1.04523	2.75376	1.57854	3.17782	1.18298	2.10125	0.837976	B9A067;Q16891-2;Q16891-4;Q16891;Q16891-3;C9J406;H7C463;A0A087WYS0;D6RAW4	B9A067;Q16891-2;Q16891-4;Q16891;Q16891-3;C9J406;H7C463	MICOS complex subunit MIC60	IMMT
NaN	NaN	NaN	NaN	NaN	NaN	NaN	NaN	-0.440459	NaN	NaN	NaN					ATP-dependent chromatin remodeling;biological regulation;biosynthetic process;cellular biosynthetic process;cellular component disassembly;cellular component disassembly at cellular level;cellular component organization;cellular component organization at cellular level;cellular component organization or biogenesis;cellular component organization or biogenesis at cellular level;cellular macromolec…	protein binding transcription factor activity;transcription coactivator activity;transcription cofactor activity;transcription factor binding transcription factor activity	cell part;chromatin;chromatin remodeling complex;chromosomal part;intracellular membrane-bounded organelle;intracellular organelle;intracellular organelle part;intracellular part;macromolecular complex;membrane-bounded organelle;nuclear chromatin;nuclear chromosome part;nuclear part;nucleus;organelle;organelle part;protein complex;SWI/SNF complex;SWI/SNF-type complex	SWIB		3	3	3	9.4	9.4	9.4	52.238	8.0127	4969100	3076600	1892500	0	NaN	0	NaN	0	-0.540459	0	NaN	J3KMX2;B9EGA3;Q92925-3;Q92925-2;Q92925;J3QWB6	J3KMX2;B9EGA3;Q92925-3;Q92925-2;Q92925;J3QWB6	SWI/SNF-related matrix-associated actin-dependent regulator of chromatin subfamily D member 2	SMARCD2
NaN	NaN	NaN	NaN	NaN	NaN	NaN	NaN	NaN	NaN	NaN	NaN					biological regulation;cellular component assembly;cellular component organization;cellular component organization or biogenesis;macromolecular complex assembly;macromolecular complex subunit organization;positive regulation of biological process;positive regulation of biosynthetic process;positive regulation of cellular biosynthetic process;positive regulation of cellular metabolic process;positi…	binding;cation binding;ion binding;metal ion binding	cell part;extracellular membrane-bounded organelle;extracellular organelle;extracellular region part;extracellular vesicular exosome;intracellular membrane-bounded organelle;intracellular organelle;intracellular part;membrane-bounded organelle;membrane-bounded vesicle;nucleus;organelle;vesicle			1	1	1	1.3	1.3	1.3	89.054	2.81	406350	291540	114810	0	NaN	0	NaN	0	NaN	0	NaN	B9EGQ5;M0QXA7;O95785-2;O95785-4;O95785-3;O95785	B9EGQ5;M0QXA7;O95785-2;O95785-4;O95785-3;O95785	Protein Wiz	WIZ
NaN	NaN	NaN	NaN	NaN	NaN	-0.28423	NaN	-1.11741	-0.841559	NaN	NaN						binding;nucleic acid binding;nucleotide binding				4	4	4	7.7	7.7	7.7	102.7	6.881	8384200	5783800	2600300	0	NaN	0	NaN	0.515168	-0.800821	0	-0.941559	B9ZVT1;Q8IXT5	B9ZVT1;Q8IXT5	RNA-binding protein 12B	RBM12B
NaN	NaN	NaN	NaN	NaN	NaN	NaN	0.673014	0.86671	NaN	NaN	NaN					biological regulation;biosynthetic process;cellular biosynthetic process;cellular macromolecule biosynthetic process;cellular macromolecule metabolic process;cellular metabolic process;cellular process;cellular protein metabolic process;cellular response to chemical stimulus;cellular response to organic substance;cellular response to stimulus;cellular response to stress;cellular response to topol…		cell part;cytoplasmic part;endoplasmic reticulum;endoplasmic reticulum membrane;endoplasmic reticulum part;integral to membrane;intracellular membrane-bounded organelle;intracellular organelle;intracellular organelle part;intracellular part;intrinsic to membrane;membrane;membrane part;membrane-bounded organelle;organelle;organelle membrane;organelle part	TRAP_alpha	Protein processing in endoplasmic reticulum	3	3	3	12.8	12.8	12.8	29.573	9.4443	11520000	4093100	7427300	0	NaN	0	NaN	1.03901	0.669862	0	NaN	C9J3L8;C9J5W0;E9PAL7;C9IZQ1;P43307;P43307-2	C9J3L8;C9J5W0;E9PAL7;C9IZQ1;P43307;P43307-2	Translocon-associated protein subunit alpha	SSR1
NaN	NaN	NaN	NaN	NaN	NaN	NaN	NaN	NaN	NaN	NaN	NaN					anatomical structure homeostasis;antigen processing and presentation;antigen processing and presentation of exogenous antigen;antigen processing and presentation of exogenous peptide antigen;antigen processing and presentation of exogenous peptide antigen via MHC class II;antigen processing and presentation of peptide antigen;antigen processing and presentation of peptide antigen via MHC class II…	binding;catalytic activity;GDP binding;GTP binding;GTPase activity;guanyl nucleotide binding;guanyl ribonucleotide binding;hydrolase activity;hydrolase activity, acting on acid anhydrides;hydrolase activity, acting on acid anhydrides, in phosphorus-containing anhydrides;nucleoside-triphosphatase activity;nucleotide binding;purine nucleotide binding;purine ribonucleoside triphosphate binding;purin…	cell part;cytoplasmic membrane-bounded vesicle;cytoplasmic part;cytoplasmic vesicle;cytoplasmic vesicle membrane;cytoplasmic vesicle part;endocytic vesicle;endocytic vesicle membrane;endosome;extracellular membrane-bounded organelle;extracellular organelle;extracellular region part;extracellular vesicular exosome;Golgi apparatus;intracellular membrane-bounded organelle;intracellular organelle;int…	Ras	Amoebiasis;Endocytosis;ko05152;Phagosome	1	1	1	12.1	12.1	12.1	13.075	2.8548	291690	167010	124670	0	NaN	0	NaN	0	NaN	0	NaN	C9IZZ0;C9J592;C9J8S3;P51149	C9IZZ0;C9J592;C9J8S3;P51149	Ras-related protein Rab-7a	RAB7A
NaN	0.390778	NaN	NaN	NaN	2.64927	NaN	3.37851	4.0571	NaN	NaN	1.9206					actin cytoskeleton organization;actin filament-based process;biological regulation;cellular component organization;cellular component organization at cellular level;cellular component organization or biogenesis;cellular component organization or biogenesis at cellular level;cellular process;cytoskeleton organization;negative regulation of actin filament polymerization;negative regulation of biolo…	actin binding;actin monomer binding;adenyl nucleotide binding;adenyl-nucleotide exchange factor activity;ATPase regulator activity;binding;cytoskeletal protein binding;enzyme regulator activity;lipid binding;nucleoside-triphosphatase regulator activity;nucleotide binding;phosphatidylinositol binding;phosphatidylinositol-4,5-bisphosphate binding;phospholipid binding;protein binding;purine nucleoti…	axon part;cell part;cell projection part;cytoplasm;cytoskeleton;extracellular membrane-bounded organelle;extracellular organelle;extracellular region part;extracellular vesicular exosome;intracellular non-membrane-bounded organelle;intracellular organelle;intracellular part;membrane-bounded organelle;membrane-bounded vesicle;non-membrane-bounded organelle;organelle;synapse part;terminal button;ve…	Profilin	Regulation of actin cytoskeleton;Shigellosis	5	5	2	63.7	63.7	18.7	9.8402	51.769	90196000	12614000	77582000	0	0.290778	0	2.54927	1.22526	3.61781	0	1.8206	C9J0J7;G5E9Q6;P35080-2;C9JQ45;C9J2N0	C9J0J7;G5E9Q6;P35080-2;C9JQ45	Profilin;Profilin-2	PFN2
NaN	-0.119604	-0.253997	NaN	0.502636	NaN	NaN	NaN	NaN	NaN	NaN	NaN					amine metabolic process;amino acid activation;biological regulation;carboxylic acid metabolic process;cellular amine metabolic process;cellular amino acid metabolic process;cellular ketone metabolic process;cellular macromolecule metabolic process;cellular metabolic process;cellular nitrogen compound metabolic process;cellular process;gene expression;macromolecule metabolic process;metabolic proc…		cell part;cytoplasm;cytoplasmic part;cytosol;extracellular membrane-bounded organelle;extracellular organelle;extracellular region part;extracellular vesicular exosome;intracellular membrane-bounded organelle;intracellular organelle;intracellular part;membrane-bounded organelle;membrane-bounded vesicle;nucleus;organelle;vesicle	GST_C_3		2	2	2	14.7	14.7	14.7	16.686	13.039	5018000	2455700	2562300	0.834119	-0.286801	0	0.402636	0	NaN	0	NaN	D6RBD7;C9J1V9;O43324-2;O43324;D6RCQ0;H0YAL7	D6RBD7;C9J1V9;O43324-2;O43324;D6RCQ0;H0YAL7	Eukaryotic translation elongation factor 1 epsilon-1	EEF1E1;EEF1E1-BLOC1S5
NaN	NaN	NaN	NaN	NaN	NaN	NaN	NaN	NaN	NaN	NaN	NaN					biological regulation;cellular process;cellular response to stimulus;establishment of localization;establishment of protein localization;intracellular signal transduction;metabolic process;protein transport;regulation of biological process;regulation of cellular process;response to stimulus;signal transduction;small GTPase mediated signal transduction;transport;vesicle-mediated transport	binding;catalytic activity;GTP binding;GTPase activity;guanyl nucleotide binding;guanyl ribonucleotide binding;hydrolase activity;hydrolase activity, acting on acid anhydrides;hydrolase activity, acting on acid anhydrides, in phosphorus-containing anhydrides;nucleoside-triphosphatase activity;nucleotide binding;purine nucleotide binding;purine ribonucleoside triphosphate binding;purine ribonucleo…	cell part;cytoplasmic part;extracellular membrane-bounded organelle;extracellular organelle;extracellular region part;extracellular vesicular exosome;Golgi apparatus;intracellular;intracellular membrane-bounded organelle;intracellular organelle;intracellular part;membrane;membrane-bounded organelle;membrane-bounded vesicle;organelle;perinuclear region of cytoplasm;plasma membrane;vesicle	Arf		4	1	1	34.7	6.7	6.7	17.107	2.4598	2540000	539890	2000100	0	NaN	0	NaN	0	NaN	0	NaN	C9J1Z8;P84085;F5H1V1;F5H6T5;F8WDB3	C9J1Z8;P84085	ADP-ribosylation factor 5	ARF5
NaN	NaN	NaN	NaN	NaN	NaN	-0.257304	-0.22366	NaN	-0.71345	NaN	-0.637783					biological regulation;biosynthetic process;cellular biosynthetic process;cellular macromolecule biosynthetic process;cellular macromolecule metabolic process;cellular metabolic process;cellular nitrogen compound metabolic process;cellular process;cellular response to stimulus;cellular response to stress;developmental process;DNA metabolic process;DNA repair;gene expression;macromolecule biosynthe…	binding;catalytic activity;cation binding;chromatin binding;DNA binding;DNA-directed RNA polymerase activity;ion binding;metal ion binding;nucleic acid binding;nucleoside binding;nucleotidyltransferase activity;ribonucleoside binding;RNA polymerase activity;transferase activity;transferase activity, transferring phosphorus-containing groups	cell part;DNA-directed RNA polymerase complex;DNA-directed RNA polymerase II, core complex;intracellular membrane-bounded organelle;intracellular organelle;intracellular organelle part;intracellular part;macromolecular complex;membrane;membrane-bounded organelle;nuclear DNA-directed RNA polymerase complex;nuclear part;nucleoplasm;nucleoplasm part;nucleus;organelle;organelle part;protein complex;R…	RNA_pol_Rpb2_1;RNA_pol_Rpb2_2;RNA_pol_Rpb2_3;RNA_pol_Rpb2_4;RNA_pol_Rpb2_5;RNA_pol_Rpb2_6;RNA_pol_Rpb2_7	Huntington's disease;Purine metabolism;Pyrimidine metabolism;RNA polymerase	5	5	5	6.4	6.4	6.4	133.06	7.0196	7641500	4209500	3432100	0	NaN	0	NaN	1.50269	-0.340482	1.50823	-0.775616	C9J2Y9;P30876;C9J4M6	C9J2Y9;P30876;C9J4M6	DNA-directed RNA polymerase;DNA-directed RNA polymerase II subunit RPB2	POLR2B
NaN	NaN	-0.503057	NaN	NaN	NaN	NaN	NaN	NaN	NaN	NaN	NaN										3	3	3	15.1	15.1	15.1	26.228	4.5103	22358000	12356000	10002000	0	-0.603057	0	NaN	0	NaN	0	NaN	C9J384;Q9BQ75-2;Q9BQ75	C9J384;Q9BQ75-2;Q9BQ75	Protein CMSS1	CMSS1
NaN	0.174023	NaN	NaN	NaN	NaN	NaN	NaN	NaN	0.592732	NaN	0.37951					biosynthetic process;catabolic process;cellular biosynthetic process;cellular catabolic process;cellular component disassembly;cellular component disassembly at cellular level;cellular component organization;cellular component organization at cellular level;cellular component organization or biogenesis;cellular component organization or biogenesis at cellular level;cellular macromolecular complex…	binding;cation binding;ion binding;metal ion binding;structural constituent of ribosome;structural molecule activity	adherens junction;anchoring junction;cell junction;cell part;cell-substrate adherens junction;cell-substrate junction;cytoplasmic part;cytosol;cytosolic large ribosomal subunit;extracellular membrane-bounded organelle;extracellular organelle;extracellular region part;extracellular vesicular exosome;focal adhesion;intracellular membrane-bounded organelle;intracellular non-membrane-bounded organell…	Ribosomal_L37ae	Ribosome	4	4	4	69.1	69.1	69.1	7.624	13.611	80074000	36775000	43300000	0	0.0740229	0	NaN	0	NaN	0.765729	0.386121	C9J4Z3;P61513;M0R0A1;Q6P4E4;E9PEL3;M0R2L6;G5E9R3;A6NKH3	C9J4Z3;P61513;M0R0A1;Q6P4E4;E9PEL3;M0R2L6;G5E9R3	60S ribosomal protein L37a	RPL37A
NaN	NaN	NaN	NaN	NaN	NaN	NaN	-0.971629	NaN	NaN	-1.28771	-0.949895					biological regulation;biosynthetic process;cellular biosynthetic process;cellular component assembly;cellular component organization;cellular component organization or biogenesis;cellular macromolecule biosynthetic process;cellular macromolecule metabolic process;cellular metabolic process;cellular nitrogen compound metabolic process;cellular process;macromolecular complex assembly;macromolecular…	binding;nucleic acid binding;nucleotide binding;RNA binding	cell part;chromosome;condensed chromosome;condensed nuclear chromosome;cytoplasm;intracellular membrane-bounded organelle;intracellular non-membrane-bounded organelle;intracellular organelle;intracellular organelle part;intracellular part;membrane-bounded organelle;non-membrane-bounded organelle;nuclear chromosome;nuclear part;nucleolus;nucleoplasm;nucleus;organelle;organelle part	hNIFK_binding;RRM_1		3	3	3	24.7	24.7	24.7	19.553	14.722	7697300	5119000	2578300	0	NaN	0	NaN	0	-1.07163	1.05716	-1.2188	C9J6C5;Q9BYG3;C9J808	C9J6C5;Q9BYG3	MKI67 FHA domain-interacting nucleolar phosphoprotein	NIFK
NaN	2.7671	5.49224	NaN	NaN	NaN	NaN	NaN	NaN	NaN	NaN	NaN					acute inflammatory response;acute-phase response;apoptosis;biological regulation;biosynthetic process;cell activation;cell death;cellular biosynthetic process;cellular component organization;cellular component organization or biogenesis;cellular lipid metabolic process;cellular membrane organization;cellular metabolic process;cellular process;death;defense response;defense response to virus;glyce…	binding;calcium ion binding;cation binding;CD4 receptor binding;DNA binding;enzyme binding;epidermal growth factor receptor binding;growth factor receptor binding;ion binding;lipid transporter activity;metal ion binding;nucleic acid binding;nucleic acid binding transcription factor activity;phospholipid scramblase activity;phospholipid transporter activity;protein binding;protein domain specific …	cell part;cytoplasmic part;cytosol;extracellular matrix;extracellular membrane-bounded organelle;extracellular organelle;extracellular region part;extracellular vesicular exosome;Golgi apparatus;integral to membrane;integral to plasma membrane;intracellular membrane-bounded organelle;intracellular non-membrane-bounded organelle;intracellular organelle;intracellular organelle part;intracellular pa…	Scramblase		4	4	4	14.1	14.1	14.1	34.217	52.027	56764000	1314200	55450000	0.682816	4.02967	0	NaN	0	NaN	0	NaN	C9J7K9;O15162-2;O15162;C9J0H3;C9J9P4;C9JE06;H7C5I5	C9J7K9;O15162-2;O15162;C9J0H3;C9J9P4;C9JE06;H7C5I5	Phospholipid scramblase 1	PLSCR1
NaN	NaN	NaN	NaN	NaN	NaN	NaN	NaN	NaN	NaN	NaN	NaN					biosynthetic process;cellular biosynthetic process;cellular macromolecule biosynthetic process;cellular macromolecule metabolic process;cellular metabolic process;cellular process;cellular protein metabolic process;cotranslational protein targeting to membrane;establishment of localization;establishment of localization in cell;establishment of protein localization;establishment of protein localiz…		cell part;cytoplasmic part;endoplasmic reticulum part;integral to endoplasmic reticulum membrane;integral to membrane;integral to organelle membrane;intracellular organelle part;intracellular part;intrinsic to endoplasmic reticulum membrane;intrinsic to membrane;intrinsic to organelle membrane;macromolecular complex;membrane part;organelle part;protein complex;Sec61 translocon complex;translocon …	TRAP-gamma	Protein processing in endoplasmic reticulum	1	1	1	8	8	8	20.161	5.1524	3310000	301930	3008000	0	NaN	0	NaN	0	NaN	0	NaN	C9JA28;Q9UNL2;Q9UNL2-2	C9JA28;Q9UNL2;Q9UNL2-2	Translocon-associated protein subunit gamma	SSR3
NaN	NaN	NaN	NaN	NaN	NaN	NaN	NaN	NaN	NaN	NaN	NaN					biological regulation;metabolic process;negative regulation of apoptosis;negative regulation of biological process;negative regulation of cell death;negative regulation of cellular process;negative regulation of programmed cell death;oxidation-reduction process;regulation of apoptosis;regulation of biological process;regulation of cell death;regulation of cellular process;regulation of programmed…		cell part;cytoplasmic part;integral to membrane;intracellular organelle part;intracellular part;intrinsic to membrane;macromolecular complex;membrane;membrane part;mitochondrial inner membrane;mitochondrial membrane;mitochondrial part;organelle inner membrane;organelle membrane;organelle part;protein complex;respiratory chain	HIG_1_N		1	1	1	21.7	21.7	21.7	8.8131	5.2964	1584400	562270	1022200	0	NaN	0	NaN	0	NaN	0	NaN	C9JAW5;C9JNU6;Q9Y241	C9JAW5;C9JNU6;Q9Y241	HIG1 domain family member 1A, mitochondrial	HIGD1A
NaN	NaN	NaN	NaN	NaN	NaN	NaN	NaN	NaN	NaN	NaN	NaN							cell part;intracellular membrane-bounded organelle;intracellular organelle;intracellular part;membrane-bounded organelle;nucleus;organelle	DUF2475		1	1	1	4.9	4.9	4.9	24.608	2.1519	21956000	144190	21812000	0	NaN	0	NaN	0	NaN	0	NaN	C9JBW9;Q6J272-2;Q6J272	C9JBW9;Q6J272-2;Q6J272	Protein FAM166A	FAM166A
NaN	NaN	NaN	NaN	NaN	NaN	NaN	NaN	2.24315	NaN	NaN	NaN					alcohol catabolic process;alcohol metabolic process;amino sugar catabolic process;amino sugar metabolic process;carbohydrate catabolic process;carbohydrate metabolic process;carbohydrate phosphorylation;carboxylic acid metabolic process;catabolic process;cellular carbohydrate catabolic process;cellular carbohydrate metabolic process;cellular ketone metabolic process;cellular metabolic process;cel…	adenyl nucleotide binding;adenyl ribonucleotide binding;ATP binding;binding;carbohydrate kinase activity;catalytic activity;kinase activity;N-acetylglucosamine kinase activity;N-acylmannosamine kinase activity;nucleotide binding;phosphotransferase activity, alcohol group as acceptor;purine nucleotide binding;purine ribonucleoside triphosphate binding;purine ribonucleotide binding;ribonucleotide b…	extracellular membrane-bounded organelle;extracellular organelle;extracellular region part;extracellular vesicular exosome;membrane-bounded organelle;membrane-bounded vesicle;organelle;vesicle	BcrAD_BadFG	Amino sugar and nucleotide sugar metabolism	3	3	3	12.6	12.6	12.6	32.017	15.788	2968400	274120	2694300	0	NaN	0	NaN	0	2.14315	0	NaN	C9JEV6;H7C3G9;Q9UJ70;Q9UJ70-2;H0YE82;H7C1L7;H0YEB7;H0YF44;H7C286	C9JEV6;H7C3G9;Q9UJ70;Q9UJ70-2;H0YE82;H7C1L7;H0YEB7	N-acetyl-D-glucosamine kinase	NAGK
NaN	-0.119369	NaN	NaN	NaN	NaN	NaN	NaN	NaN	NaN	NaN	NaN					biological regulation;cellular macromolecule metabolic process;cellular metabolic process;cellular nitrogen compound metabolic process;cellular process;interaction with host;interspecies interaction between organisms;macromolecule metabolic process;metabolic process;modification by symbiont of host morphology or physiology;modification by virus of host mRNA processing;modification of morphology o…	binding;cation binding;ion binding;metal ion binding;nucleic acid binding;transition metal ion binding;zinc ion binding	cell part;intracellular organelle part;intracellular part;macromolecular complex;mRNA cleavage and polyadenylation specificity factor complex;mRNA cleavage factor complex;nuclear part;nucleoplasm;nucleoplasm part;organelle part;protein complex	zf-CCCH;zf-CCHC	mRNA surveillance pathway	1	1	1	25	25	25	4.7322	2.2386	798600	447470	351130	0	-0.219369	0	NaN	0	NaN	0	NaN	F8WEL7;C9JEV9;O95639-3;O95639-2;O95639	F8WEL7;C9JEV9;O95639-3;O95639-2;O95639	Cleavage and polyadenylation specificity factor subunit 4	CPSF4
NaN	NaN	-1.65023	-0.664974	-0.52531	NaN	NaN	NaN	NaN	NaN	-0.781876	NaN					aging;alcohol metabolic process;anatomical structure development;anatomical structure formation involved in morphogenesis;anatomical structure morphogenesis;angiogenesis;axon regeneration;axonogenesis;biological regulation;brain development;carbohydrate metabolic process;cell part morphogenesis;cell projection morphogenesis;cell projection organization;cellular carbohydrate metabolic process;cell…	binding;cholesterol binding;lipid binding;lipid transporter activity;steroid binding;sterol binding;substrate-specific transporter activity;transporter activity	cell body;cell part;cell projection;cytoplasmic part;cytosolic part;cytosolic ribosome;dendrite;endoplasmic reticulum;extracellular membrane-bounded organelle;extracellular organelle;extracellular region;extracellular region part;extracellular space;extracellular vesicular exosome;intracellular membrane-bounded organelle;intracellular non-membrane-bounded organelle;intracellular organelle;intrace…	Lipocalin;Lipocalin_2		4	4	4	20.9	20.9	20.9	24.158	57.45	58653000	53206000	5447700	0	-1.75023	1.19559	-0.695142	0	NaN	0	-0.881876	C9JF17;P05090;C9JX71;F8WBT9	C9JF17;P05090;C9JX71	Apolipoprotein D	APOD
NaN	0.276556	NaN	NaN	NaN	NaN	NaN	NaN	NaN	NaN	NaN	NaN					activation of caspase activity;activation of caspase activity by cytochrome c;apoptosis;biological regulation;biosynthetic process;catabolic process;cell death;cellular biosynthetic process;cellular catabolic process;cellular component organization;cellular component organization at cellular level;cellular component organization or biogenesis;cellular component organization or biogenesis at cellu…	binding;cation binding;electron carrier activity;electron transporter, transferring electrons from CoQH2-cytochrome c reductase complex and cytochrome c oxidase complex activity;heme binding;ion binding;iron ion binding;metal ion binding;tetrapyrrole binding;transition metal ion binding	cell part;cytoplasmic part;cytosol;intracellular membrane-bounded organelle;intracellular organelle;intracellular organelle part;intracellular part;macromolecular complex;membrane;membrane part;membrane-bounded organelle;membrane-enclosed lumen;mitochondrial inner membrane;mitochondrial intermembrane space;mitochondrial membrane;mitochondrial part;mitochondrion;nucleus;organelle;organelle envelop…	Cytochrom_C	Alzheimer's disease;Amyotrophic lateral sclerosis (ALS);Apoptosis;Colorectal cancer;Huntington's disease;ko05152;p53 signaling pathway;Parkinson's disease;Pathways in cancer;Small cell lung cancer;Toxoplasmosis;Viral myocarditis	2	2	2	21.8	21.8	21.8	11.333	6.5739	2342900	1108500	1234400	0	0.176556	0	NaN	0	NaN	0	NaN	C9JFR7;P99999	C9JFR7;P99999	Cytochrome c	CYCS
NaN	NaN	NaN	NaN	NaN	NaN	NaN	NaN	NaN	NaN	NaN	NaN					biosynthetic process;cellular biosynthetic process;cellular component disassembly;cellular component disassembly at cellular level;cellular component organization;cellular component organization at cellular level;cellular component organization or biogenesis;cellular component organization or biogenesis at cellular level;cellular macromolecular complex disassembly;cellular macromolecular complex …	binding;nucleotide binding	cell part;cytoplasmic part;intracellular non-membrane-bounded organelle;intracellular organelle;intracellular organelle part;intracellular part;macromolecular complex;membrane;mitochondrial inner membrane;mitochondrial membrane;mitochondrial part;mitochondrial ribosome;non-membrane-bounded organelle;organellar ribosome;organelle;organelle inner membrane;organelle membrane;organelle part;ribonucle…			3	3	3	12.8	12.8	12.8	34.032	4.6486	4722600	2039700	2682800	0	NaN	0	NaN	0	NaN	0	NaN	C9JG87;Q9NYK5;Q9NYK5-2	C9JG87;Q9NYK5;Q9NYK5-2	39S ribosomal protein L39, mitochondrial	MRPL39
NaN	NaN	NaN	NaN	NaN	NaN	NaN	NaN	NaN	NaN	NaN	NaN					beta-amyloid metabolic process;cellular macromolecule metabolic process;cellular metabolic process;cellular process;glycoprotein metabolic process;macromolecule metabolic process;metabolic process;primary metabolic process;protein metabolic process;proteolysis	catalytic activity;endopeptidase activity;exopeptidase activity;hydrolase activity;omega peptidase activity;peptidase activity;peptidase activity, acting on L-amino acid peptides;serine hydrolase activity;serine-type endopeptidase activity;serine-type peptidase activity	cell part;cytoplasm;extracellular membrane-bounded organelle;extracellular organelle;extracellular region part;extracellular vesicular exosome;intracellular organelle part;intracellular part;membrane;membrane-bounded organelle;membrane-bounded vesicle;nuclear membrane;nuclear part;organelle;organelle membrane;organelle part;vesicle	Peptidase_S9		2	2	2	10.8	10.8	10.8	26.028	8.0443	6259900	2144500	4115400	0	NaN	0	NaN	0	NaN	0	NaN	C9JLK2;H7C393;H7C1U0;C9JIF9;P13798	C9JLK2;H7C393;H7C1U0;C9JIF9;P13798	Acylamino-acid-releasing enzyme	APEH
NaN	0.206518	NaN	NaN	NaN	NaN	NaN	NaN	NaN	NaN	NaN	NaN					biological regulation;biosynthetic process;cellular biosynthetic process;cellular macromolecule biosynthetic process;cellular macromolecule metabolic process;cellular metabolic process;cellular nitrogen compound metabolic process;cellular process;cellular response to stimulus;cellular response to stress;defense response;developmental process;DNA metabolic process;DNA repair;gene expression;immune…	binding;catalytic activity;DNA binding;DNA-directed RNA polymerase activity;nucleic acid binding;nucleotidyltransferase activity;RNA polymerase activity;transferase activity;transferase activity, transferring phosphorus-containing groups	cell part;cytoplasmic part;cytosol;DNA-directed RNA polymerase complex;DNA-directed RNA polymerase I complex;DNA-directed RNA polymerase II, core complex;DNA-directed RNA polymerase III complex;intracellular membrane-bounded organelle;intracellular organelle;intracellular organelle part;intracellular part;macromolecular complex;membrane-bounded organelle;nuclear DNA-directed RNA polymerase comple…	RNA_pol_Rpb8	Cytosolic DNA-sensing pathway;Huntington's disease;Purine metabolism;Pyrimidine metabolism;RNA polymerase	3	3	3	24.2	24.2	24.2	16.996	10.025	5296600	2441100	2855500	0	0.106518	0	NaN	0	NaN	0	NaN	C9JLU1;P52434;P52434-4;P52434-3;P52434-2	C9JLU1;P52434;P52434-4;P52434-3	DNA-directed RNA polymerases I, II, and III subunit RPABC3	POLR2H
NaN	NaN	NaN	NaN	NaN	NaN	NaN	NaN	NaN	NaN	NaN	NaN					biological regulation;catabolic process;cellular catabolic process;cellular macromolecule catabolic process;cellular macromolecule metabolic process;cellular metabolic process;cellular process;cellular protein metabolic process;cellular response to stimulus;chordate embryonic development;cullin deneddylation;developmental process;embryo development;embryo development ending in birth or egg hatchi…		cell part;cytoplasm;intracellular membrane-bounded organelle;intracellular organelle;intracellular organelle part;intracellular part;macromolecular complex;membrane-bounded organelle;nuclear part;nucleoplasm;nucleus;organelle;organelle part;protein complex;signalosome	PCI		1	1	1	60	60	60	2.1494	54.31	0	0	0	0	NaN	0	NaN	0	NaN	0	NaN	J3QL22;J3QS85;J3KTQ1;J3QKR0;C9JLV5;Q9UNS2	J3QL22;J3QS85;J3KTQ1;J3QKR0;C9JLV5;Q9UNS2	COP9 signalosome complex subunit 3	COPS3
NaN	NaN	NaN	NaN	NaN	NaN	NaN	NaN	NaN	0.0187766	NaN	NaN					anatomical structure morphogenesis;biological regulation;cellular macromolecule metabolic process;cellular metabolic process;cellular nitrogen compound metabolic process;cellular process;cellular protein metabolic process;cellular response to chemical stimulus;cellular response to dsRNA;cellular response to organic substance;cellular response to oxidative stress;cellular response to stimulus;cell…	binding;catalytic activity;double-stranded RNA binding;enzyme activator activity;enzyme binding;enzyme regulator activity;identical protein binding;kinase activity;nucleic acid binding;protein binding;protein dimerization activity;protein homodimerization activity;RNA binding;transferase activity;transferase activity, transferring phosphorus-containing groups	cell part;cytoplasm;cytoplasmic part;cytosol;intracellular organelle part;intracellular part;membrane;nuclear part;nucleoplasm;organelle part;perinuclear region of cytoplasm	dsrm		2	2	2	26.3	26.3	26.3	10.414	4.3359	3515900	1264900	2251000	0	NaN	0	NaN	0	NaN	0	-0.0812234	F8WEG8;G5E9Q4;C9JMM3;O75569-3;O75569-2;O75569	F8WEG8;G5E9Q4;C9JMM3;O75569-3;O75569-2;O75569	Interferon-inducible double-stranded RNA-dependent protein kinase activator A	PRKRA
0.00216244	0.157303	-0.315612	NaN	-0.366522	NaN	NaN	-0.0120243	0.258217	NaN	NaN	0.510557					anatomical structure development;axon guidance;biological regulation;biosynthetic process;catabolic process;cell cycle checkpoint;cell cycle process;cellular biosynthetic process;cellular catabolic process;cellular component assembly;cellular component assembly at cellular level;cellular component disassembly;cellular component disassembly at cellular level;cellular component organization;cellula…	binding;nucleic acid binding;RNA binding;structural constituent of ribosome;structural molecule activity	cell part;cytoplasmic part;cytosol;cytosolic large ribosomal subunit;extracellular membrane-bounded organelle;extracellular organelle;extracellular region part;extracellular vesicular exosome;intracellular non-membrane-bounded organelle;intracellular organelle;intracellular organelle part;intracellular part;large ribosomal subunit;macromolecular complex;membrane;membrane-bounded organelle;membran…	Ribosomal_L24e	Ribosome	5	5	5	39.7	39.7	39.7	14.369	14.166	181790000	88095000	93691000	0.410407	-0.152049	0	-0.466522	0.0495267	0.0230965	0	0.410557	C9JXB8;C9JNW5;P83731	C9JXB8;C9JNW5;P83731	60S ribosomal protein L24	RPL24
NaN	NaN	NaN	NaN	NaN	NaN	NaN	NaN	NaN	NaN	NaN	NaN					cellular component organization;cellular component organization at cellular level;cellular component organization or biogenesis;cellular component organization or biogenesis at cellular level;cellular membrane fusion;cellular membrane organization;cellular process;ER to Golgi vesicle-mediated transport;establishment of localization;establishment of localization in cell;establishment of protein lo…	binding;protein binding;SNAP receptor activity;SNARE binding;transporter activity	cell part;cytoplasmic part;endoplasmic reticulum membrane;endoplasmic reticulum part;integral to membrane;intracellular organelle part;intracellular part;intrinsic to membrane;macromolecular complex;membrane;membrane part;organelle membrane;organelle part;protein complex;SNARE complex	Longin		2	2	2	9.6	9.6	9.6	24.506	4.727	1837400	101000	1736400	0	NaN	0	NaN	0	NaN	0	NaN	C9JRY4;C9JNZ0;Q96IW7;F8WAU7;C9JR77;C9J463;C9JZ27;C9JDJ8	C9JRY4;C9JNZ0;Q96IW7;F8WAU7;C9JR77;C9J463;C9JZ27;C9JDJ8	Vesicle-trafficking protein SEC22a	SEC22A
0.0585243	NaN	NaN	NaN	NaN	NaN	NaN	NaN	NaN	NaN	NaN	NaN					biotin metabolic process;carboxylic acid catabolic process;carboxylic acid metabolic process;catabolic process;cellular amide metabolic process;cellular catabolic process;cellular ketone metabolic process;cellular lipid catabolic process;cellular lipid metabolic process;cellular metabolic process;cellular nitrogen compound metabolic process;cellular process;cofactor metabolic process;fatty acid b…	adenyl nucleotide binding;adenyl ribonucleotide binding;ATP binding;binding;catalytic activity;CoA carboxylase activity;ligase activity;ligase activity, forming carbon-carbon bonds;nucleotide binding;propionyl-CoA carboxylase activity;purine nucleotide binding;purine ribonucleoside triphosphate binding;purine ribonucleotide binding;ribonucleotide binding	cell part;cytoplasmic part;cytosol;intracellular membrane-bounded organelle;intracellular organelle;intracellular organelle lumen;intracellular organelle part;intracellular part;membrane-bounded organelle;membrane-enclosed lumen;mitochondrial matrix;mitochondrial part;mitochondrion;organelle;organelle lumen;organelle part	Carboxyl_trans	Carbon fixation pathways in prokaryotes;Glyoxylate and dicarboxylate metabolism;Propanoate metabolism;Valine, leucine and isoleucine degradation	5	5	5	12	12	12	52.423	25.711	8714500	4441900	4272600	0	-0.0414757	0	NaN	0	NaN	0	NaN	E7ETT4;E7EUY3;E7ETT1;E9PDR0;C9JQS9;E7EX59;P05166;P05166-2;F8WBI9;E9PEC3;E7ENC1;C9JVY9	E7ETT4;E7EUY3;E7ETT1;E9PDR0;C9JQS9;E7EX59;P05166;P05166-2;F8WBI9;E9PEC3	Propionyl-CoA carboxylase beta chain, mitochondrial	PCCB
NaN	NaN	NaN	NaN	NaN	NaN	NaN	NaN	NaN	NaN	NaN	NaN					acidic amino acid transport;amine transport;amino acid transport;anion transport;biological regulation;carboxylic acid transport;cellular chemical homeostasis;cellular homeostasis;cellular ion homeostasis;cellular process;chemical homeostasis;establishment of localization;homeostatic process;induction of apoptosis;induction of apoptosis by intracellular signals;induction of apoptosis by oxidative…		cell part;cytoplasmic part;endoplasmic reticulum;endoplasmic reticulum membrane;endoplasmic reticulum part;extracellular membrane-bounded organelle;extracellular organelle;extracellular region part;extracellular vesicular exosome;integral to membrane;intracellular membrane-bounded organelle;intracellular organelle;intracellular organelle part;intracellular part;intrinsic to membrane;membrane;memb…	PRA1		2	2	2	33.9	33.9	33.9	6.8708	2.4712	2523900	118240	2405700	0	NaN	0	NaN	0	NaN	0	NaN	F8WF90;C9JQU6;F8WF33;O75915	F8WF90;C9JQU6;F8WF33;O75915	PRA1 family protein 3	ARL6IP5
NaN	NaN	NaN	NaN	NaN	NaN	NaN	NaN	NaN	NaN	NaN	NaN								DUF2373		2	2	2	16	16	16	18.743	4.2405	4324800	1858200	2466600	0	NaN	0	NaN	0	NaN	0	NaN	H7C0T1;H7C2R9;C9JQV0;Q9BRJ6	H7C0T1;H7C2R9;C9JQV0;Q9BRJ6	Uncharacterized protein C7orf50	C7orf50
NaN	NaN	NaN	NaN	NaN	NaN	NaN	NaN	NaN	NaN	NaN	NaN							cell part;integral to membrane;intrinsic to membrane;membrane part	Vps55		1	1	1	12.3	12.3	12.3	11.698	8.2699	2850800	1112600	1738200	0	NaN	0	NaN	0	NaN	0	NaN	E5RIL0;H0YBC1;C9JVM4;E5RJS9;E5RHU8;O95214;O95214-2	E5RIL0;H0YBC1;C9JVM4;E5RJS9;E5RHU8;O95214;O95214-2	Leptin receptor overlapping transcript-like 1	LEPROTL1
NaN	-0.513687	NaN	NaN	NaN	NaN	NaN	NaN	NaN	-1.6491	-1.6486	0.23352					biological regulation;cell cycle phase;cell cycle process;cell division;cellular component assembly;cellular component assembly at cellular level;cellular component organization;cellular component organization at cellular level;cellular component organization or biogenesis;cellular component organization or biogenesis at cellular level;cellular process;chromosome segregation;cytoskeleton organiza…	binding;chromatin binding;chromatin DNA binding;DNA binding;enzyme regulator activity;GTPase regulator activity;guanyl-nucleotide exchange factor activity;histone binding;nucleic acid binding;nucleoside-triphosphatase regulator activity;nucleosomal DNA binding;nucleosome binding;protein binding;Ran guanyl-nucleotide exchange factor activity;Ras guanyl-nucleotide exchange factor activity;small GTP…	cell part;chromatin;chromosomal part;chromosome;condensed chromosome;condensed nuclear chromosome;cytoplasm;intracellular membrane-bounded organelle;intracellular non-membrane-bounded organelle;intracellular organelle;intracellular organelle part;intracellular part;membrane;membrane-bounded organelle;non-membrane-bounded organelle;nuclear chromatin;nuclear chromosome;nuclear chromosome part;nucle…	RCC1		6	6	6	20.4	20.4	20.4	39.584	35.27	35947000	22996000	12952000	0	-0.613687	0	NaN	0	NaN	0.66592	-1.12139	C9JW69;P18754;P18754-2;C9JRH2;C9JMJ4;C9J3R0;C9JQZ4	C9JW69;P18754;P18754-2;C9JRH2;C9JMJ4;C9J3R0;C9JQZ4	Regulator of chromosome condensation	RCC1
NaN	NaN	NaN	NaN	NaN	NaN	NaN	NaN	NaN	NaN	NaN	NaN					apoptosis;biological regulation;catabolic process;cell death;cell surface receptor linked signaling pathway;cellular catabolic process;cellular component disassembly;cellular component disassembly at cellular level;cellular component disassembly involved in apoptosis;cellular component organization;cellular component organization at cellular level;cellular component organization or biogenesis;cel…	binding;nuclear localization sequence binding;peptide binding;protein transporter activity;signal sequence binding;substrate-specific transporter activity;transporter activity	cell part;cell projection;cytoplasm;cytoplasmic part;cytosol;dendrite;intracellular membrane-bounded organelle;intracellular organelle;intracellular organelle part;intracellular part;macromolecular complex;membrane;membrane part;membrane-bounded organelle;neuron projection;nuclear part;nuclear pore;nucleoplasm;nucleus;organelle;organelle part;pore complex;protein complex	Arm;IBB		2	2	2	6.7	6.7	6.7	36.83	4.8183	15824000	6603100	9221300	0	NaN	0	NaN	0	NaN	0	NaN	C9JYI4;P52294;C9J352;C9JWD9;F2Z3G4;C9J4U1;Q5TFJ7;O60684;O15131	C9JYI4;P52294;C9J352;C9JWD9;F2Z3G4;C9J4U1;Q5TFJ7;O60684;O15131	Importin subunit alpha-5;Importin subunit alpha-5, N-terminally processed;Importin subunit alpha-7;Importin subunit alpha-6	KPNA1;KPNA6;KPNA5
NaN	0.193456	-0.135396	NaN	NaN	-0.437135	NaN	-0.625556	NaN	0.0827026	NaN	0.0635029					biosynthetic process;cellular biosynthetic process;cellular macromolecule biosynthetic process;cellular macromolecule metabolic process;cellular metabolic process;cellular process;cellular protein metabolic process;macromolecule biosynthetic process;macromolecule metabolic process;metabolic process;primary metabolic process;protein metabolic process;translation	structural constituent of ribosome;structural molecule activity	cell part;cytoplasmic part;intracellular non-membrane-bounded organelle;intracellular organelle;intracellular part;macromolecular complex;non-membrane-bounded organelle;organelle;ribonucleoprotein complex;ribosome	Ribosomal_L22e	Ribosome	3	3	3	25.6	25.6	25.6	14.478	8.3909	70261000	37796000	32465000	0.130417	-0.0709698	0	-0.537135	0	-0.725556	0.661059	-0.0268973	C9JYQ9;H0Y8C2;Q6P5R6	C9JYQ9;H0Y8C2;Q6P5R6	60S ribosomal protein L22-like 1	RPL22L1
NaN	NaN	NaN	NaN	NaN	NaN	NaN	NaN	NaN	NaN	NaN	NaN					aromatic compound catabolic process;carboxylic acid catabolic process;carboxylic acid metabolic process;catabolic process;cellular aromatic compound metabolic process;cellular catabolic process;cellular ketone metabolic process;cellular metabolic process;cellular process;coumarin catabolic process;coumarin metabolic process;heterocycle catabolic process;heterocycle metabolic process;metabolic pro…	3,4-dihydrocoumarin hydrolase activity;aryldialkylphosphatase activity;arylesterase activity;binding;carboxylic ester hydrolase activity;catalytic activity;cation binding;dihydrocoumarin hydrolase activity;hydrolase activity;hydrolase activity, acting on ester bonds;identical protein binding;ion binding;metal ion binding;phosphatase activity;phosphoric ester hydrolase activity;protein binding;pro…	cell part;extracellular membrane-bounded organelle;extracellular organelle;extracellular region part;extracellular space;extracellular vesicular exosome;intracellular membrane-bounded organelle;intracellular organelle;intracellular part;membrane-bounded organelle;membrane-bounded vesicle;organelle;vesicle	Arylesterase	Aminobenzoate degradation;Bisphenol degradation	1	1	1	6.1	6.1	6.1	27.728	2.17	848750000	4943600	843810000	0	NaN	0	NaN	0	NaN	0	NaN	C9JZ99;F8WD41;Q15166	C9JZ99;F8WD41;Q15166	Serum paraoxonase/lactonase 3	PON3
NaN	NaN	NaN	NaN	NaN	0.0173518	0.897163	0.298306	NaN	NaN	-0.367118	0.524465					adherens junction organization;anatomical structure development;biological adhesion;biological regulation;biosynthetic process;brain development;cell adhesion;cell junction assembly;cell junction organization;cell surface receptor linked signaling pathway;cell-cell adhesion;cell-cell junction organization;cellular biosynthetic process;cellular component assembly;cellular component assembly at cel…	binding;cadherin binding;cell adhesion molecule binding;protein binding;receptor binding	adherens junction;anchoring junction;cell junction;cell part;cell projection;cell projection part;cell-cell adherens junction;cell-cell junction;cytoplasm;cytoplasmic part;cytosol;dendritic spine;extracellular membrane-bounded organelle;extracellular organelle;extracellular region part;extracellular vesicular exosome;growth cone;intracellular membrane-bounded organelle;intracellular organelle;int…	Arm	Adherens junction;Leukocyte transendothelial migration	6	6	6	7.9	7.9	7.9	104.85	11.242	13444000	5882000	7561600	0	NaN	0	-0.0826482	0.462456	0.497735	0.0134218	-0.0213263	C9JZR2;O60716-5;O60716-3;O60716-2;O60716;O60716-21;O60716-19;O60716-18;O60716-17;O60716-13;O60716-11;O60716-10;O60716-8;O60716-9;O60716-7;O60716-6;O60716-4;O60716-29;O60716-27;O60716-26;O60716-25;O60716-24;O60716-23;O60716-22;O60716-20;O60716-16;O60716-15;O60716-14;O60716-12;O60716-32;O60716-31;O60716-30;O60716-28;H0YC95;E9PRE2	C9JZR2;O60716-5;O60716-3;O60716-2;O60716;O60716-21;O60716-19;O60716-18;O60716-17;O60716-13;O60716-11;O60716-10;O60716-8;O60716-9;O60716-7;O60716-6;O60716-4;O60716-29;O60716-27;O60716-26;O60716-25;O60716-24;O60716-23;O60716-22;O60716-20;O60716-16;O60716-15;O60716-14;O60716-12;O60716-32;O60716-31;O60716-30;O60716-28	Catenin delta-1	CTNND1
NaN	NaN	NaN	NaN	NaN	NaN	NaN	NaN	2.42304	NaN	NaN	NaN					acylglycerol biosynthetic process;acylglycerol metabolic process;biosynthetic process;carboxylic acid biosynthetic process;carboxylic acid metabolic process;cardiolipin acyl-chain remodeling;cardiolipin metabolic process;CDP-diacylglycerol biosynthetic process;CDP-diacylglycerol metabolic process;cellular biosynthetic process;cellular ketone metabolic process;cellular lipid metabolic process;cell…	1-acylglycerol-3-phosphate O-acyltransferase activity;acylglycerol O-acyltransferase activity;catalytic activity;O-acyltransferase activity;transferase activity;transferase activity, transferring acyl groups;transferase activity, transferring acyl groups other than amino-acyl groups	cell part;cytoplasmic part;endoplasmic reticulum membrane;endoplasmic reticulum part;integral to membrane;intracellular organelle part;intracellular part;intrinsic to membrane;membrane;membrane part;organelle membrane;organelle part	Acyltransferase	Glycerolipid metabolism;Glycerophospholipid metabolism	2	2	2	14.6	14.6	14.6	18.429	5.3417	9616000	349510	9266500	0	NaN	0	NaN	0	2.32304	0	NaN	C9K0C3;Q6UWP7-2;Q6UWP7-3;Q6UWP7;C9J5S5;C9JA02;C9JMW2;C9JUV9;C9JXY8;C9J6F4	C9K0C3;Q6UWP7-2;Q6UWP7-3;Q6UWP7;C9J5S5;C9JA02;C9JMW2;C9JUV9;C9JXY8;C9J6F4	Lysocardiolipin acyltransferase 1	LCLAT1
NaN	NaN	NaN	NaN	NaN	NaN	-0.467274	-0.235314	-0.410428	0.0731348	0.367707	0.101516					actin cytoskeleton organization;actin filament organization;actin filament-based process;anatomical structure development;biological regulation;calcium-mediated signaling;cell cycle arrest;cell cycle process;cell differentiation;cell migration;cell motility;cell projection assembly;cell projection organization;cellular component assembly;cellular component assembly at cellular level;cellular comp…	binding;enzyme binding;enzyme inhibitor activity;enzyme regulator activity;phosphatase binding;phosphatase inhibitor activity;phosphatase regulator activity;protein binding;protein phosphatase 1 binding;protein phosphatase binding;protein phosphatase inhibitor activity;protein phosphatase regulator activity	adherens junction;anchoring junction;cell cortex part;cell junction;cell part;cell projection;cell projection membrane;cell projection part;cortical actin cytoskeleton;cortical cytoskeleton;cytoplasm;cytoplasmic part;cytoskeletal part;cytoskeleton;dendritic spine;filopodium;intracellular non-membrane-bounded organelle;intracellular organelle;intracellular organelle part;intracellular part;lamelli…	PDZ		13	13	12	20.3	20.3	19.1	89.333	27.133	52678000	27014000	25664000	0	NaN	0	NaN	1.67234	-0.471006	0.318813	0.0807857	D3DTX6;Q96SB3	D3DTX6;Q96SB3	Neurabin-2	PPP1R9B
NaN	NaN	NaN	NaN	NaN	NaN	NaN	NaN	NaN	NaN	NaN	NaN							cell part;integral to membrane;intrinsic to membrane;membrane part			2	2	2	16.4	16.4	16.4	18.822	21.026	9984900	312050	9672800	0	NaN	0	NaN	0	NaN	0	NaN	D3DVS1;Q5BJH2	D3DVS1;Q5BJH2	Transmembrane protein 128	TMEM128
0.257735	0.0515809	NaN	NaN	NaN	NaN	NaN	NaN	NaN	NaN	NaN	NaN					biosynthetic process;catabolic process;cellular biosynthetic process;cellular catabolic process;cellular component disassembly;cellular component disassembly at cellular level;cellular component organization;cellular component organization at cellular level;cellular component organization or biogenesis;cellular component organization or biogenesis at cellular level;cellular macromolecular complex…	structural constituent of ribosome;structural molecule activity	cell part;centrosome;cytoplasm;cytoplasmic part;cytoskeletal part;cytosol;cytosolic large ribosomal subunit;intracellular non-membrane-bounded organelle;intracellular organelle;intracellular organelle part;intracellular part;large ribosomal subunit;macromolecular complex;membrane;microtubule organizing center;non-membrane-bounded organelle;organelle;organelle part;ribonucleoprotein complex;riboso…	Ribosomal_L32e	Ribosome	8	8	8	52.6	52.6	52.6	15.616	59.201	155340000	77443000	77902000	0.161398	0.0546579	0	NaN	0	NaN	0	NaN	D3YTB1;F8W727;P62910;D3YTI8	D3YTB1;F8W727;P62910	60S ribosomal protein L32	RPL32
NaN	NaN	NaN	NaN	NaN	NaN	NaN	NaN	NaN	NaN	NaN	NaN					biological regulation;catabolic process;cellular catabolic process;cellular macromolecule catabolic process;cellular macromolecule metabolic process;cellular metabolic process;cellular nitrogen compound metabolic process;cellular process;exonucleolytic nuclear-transcribed mRNA catabolic process involved in deadenylation-dependent decay;gene expression;immune response;immune system process;macromo…	3'-5' exonuclease activity;3'-5'-exoribonuclease activity;AU-rich element binding;binding;catalytic activity;exonuclease activity;exonuclease activity, active with either ribo- or deoxyribonucleic acids and producing 5'-phosphomonoesters;exoribonuclease activity;exoribonuclease activity, producing 5'-phosphomonoesters;hydrolase activity;hydrolase activity, acting on ester bonds;nuclease activity;…	cell part;chromosome;cytoplasm;cytoplasmic part;cytoskeleton;cytosol;exosome (RNase complex);extracellular membrane-bounded organelle;extracellular organelle;extracellular region part;extracellular vesicular exosome;intermediate filament cytoskeleton;intracellular membrane-bounded organelle;intracellular non-membrane-bounded organelle;intracellular organelle;intracellular organelle part;intracell…	RNase_PH;RNase_PH_C	RNA degradation	1	1	1	5.8	5.8	5.8	18.67	2.4679	1420300	821510	598810	0	NaN	0	NaN	0	NaN	0	NaN	H0Y9L5;D6R905;D6RIY6;Q06265-3;Q06265-4;Q06265;Q06265-2	H0Y9L5;D6R905;D6RIY6;Q06265-3;Q06265-4;Q06265;Q06265-2	Exosome complex component RRP45	EXOSC9
NaN	NaN	NaN	NaN	NaN	NaN	NaN	NaN	NaN	NaN	NaN	NaN					biological regulation;cell differentiation;cellular developmental process;cellular process;developmental process;muscle cell differentiation;negative regulation of biological process;negative regulation of cell communication;negative regulation of cellular process;negative regulation of intracellular protein kinase cascade;negative regulation of MAPKKK cascade;negative regulation of response to s…		cell part;integral to membrane;integral to nuclear inner membrane;integral to organelle membrane;intracellular organelle part;intracellular part;intrinsic to membrane;intrinsic to nuclear inner membrane;intrinsic to organelle membrane;membrane;membrane part;nuclear membrane;nuclear membrane part;nuclear part;organelle membrane;organelle part	LEM;MSC		1	1	1	24.1	24.1	24.1	5.9066	3.004	1371200	713730	657420	0	NaN	0	NaN	0	NaN	0	NaN	D6R958;H7C2Z0;Q8NC56-2;Q8NC56	D6R958;H7C2Z0;Q8NC56-2;Q8NC56	LEM domain-containing protein 2	LEMD2
NaN	NaN	NaN	NaN	0.200755	-0.0713909	NaN	1.07348	NaN	NaN	NaN	NaN					anatomical structure development;biological regulation;biosynthetic process;catabolic process;cell cycle process;cell surface receptor linked signaling pathway;cellular biosynthetic process;cellular catabolic process;cellular macromolecule biosynthetic process;cellular macromolecule catabolic process;cellular macromolecule metabolic process;cellular metabolic process;cellular nitrogen compound me…	binding;nucleic acid binding;RNA binding;RNA cap binding;translation factor activity, nucleic acid binding;translation initiation factor activity	cell part;chromatoid body;cytoplasm;cytoplasmic mRNA processing body;cytoplasmic part;cytosol;eukaryotic translation initiation factor 4F complex;extracellular membrane-bounded organelle;extracellular organelle;extracellular region part;extracellular vesicular exosome;intracellular non-membrane-bounded organelle;intracellular organelle;intracellular part;macromolecular complex;membrane-bounded or…	IF4E	Insulin signaling pathway;mTOR signaling pathway;RNA transport	4	4	4	18	18	18	28.512	7.1166	32179000	15501000	16678000	0	NaN	0.0765835	-0.0353178	0	0.973478	0	NaN	D6RBW1;P06730;P06730-3;P06730-2;H0Y8J7	D6RBW1;P06730;P06730-3;P06730-2	Eukaryotic translation initiation factor 4E	EIF4E
NaN	NaN	NaN	NaN	NaN	NaN	NaN	NaN	-1.72671	-1.95909	NaN	NaN					cellular macromolecule metabolic process;cellular metabolic process;cellular nitrogen compound metabolic process;cellular process;macromolecule metabolic process;macromolecule modification;metabolic process;ncRNA metabolic process;ncRNA processing;nitrogen compound metabolic process;nucleic acid metabolic process;nucleobase-containing compound metabolic process;primary metabolic process;pseudouri…	binding;nucleic acid binding;RNA binding;snoRNA binding	Cajal body;cell part;cytoplasm;intracellular non-membrane-bounded organelle;intracellular organelle;intracellular organelle part;intracellular part;macromolecular complex;non-membrane-bounded organelle;nuclear body;nuclear part;nucleolus;nucleoplasm;nucleoplasm part;organelle;organelle part;ribonucleoprotein complex;small nucleolar ribonucleoprotein complex	Ribosomal_L7Ae	Ribosome biogenesis in eukaryotes	2	2	2	22	22	22	15.017	6.2236	16787000	13122000	3665600	0	NaN	0	NaN	0	-1.82671	0	-2.05909	D6RC52;D6RCB9;Q9NX24;H0YC83;J3QSY4	D6RC52;D6RCB9;Q9NX24;H0YC83;J3QSY4	H/ACA ribonucleoprotein complex subunit 2	NHP2
NaN	NaN	NaN	NaN	NaN	NaN	NaN	1.4599	NaN	NaN	NaN	NaN					androgen catabolic process;androgen metabolic process;biological regulation;biosynthetic process;catabolic process;cellular hormone metabolic process;cellular metabolic process;cellular process;hormone catabolic process;hormone metabolic process;lipid biosynthetic process;lipid catabolic process;lipid metabolic process;metabolic process;primary metabolic process;regulation of biological quality;r…	catalytic activity;estradiol 17-beta-dehydrogenase activity;oxidoreductase activity;oxidoreductase activity, acting on CH-OH group of donors;oxidoreductase activity, acting on the CH-OH group of donors, NAD or NADP as acceptor;steroid dehydrogenase activity;steroid dehydrogenase activity, acting on the CH-OH group of donors, NAD or NADP as acceptor	cell part;cytoplasm;cytoplasmic part;extracellular region;intracellular part;lipid particle	adh_short		1	1	1	5.9	5.9	5.9	28.102	6.6869	1986900	468890	1518000	0	NaN	0	NaN	0	1.3599	0	NaN	D6RCD0;Q8NBQ5	D6RCD0;Q8NBQ5	Estradiol 17-beta-dehydrogenase 11	HSD17B11
NaN	NaN	NaN	NaN	NaN	NaN	NaN	NaN	NaN	2.41619	1.64695	1.93738					actin cytoskeleton organization;actin filament-based process;actomyosin structure organization;cellular component organization;cellular component organization at cellular level;cellular component organization or biogenesis;cellular component organization or biogenesis at cellular level;cellular process;cytoskeleton organization;organelle organization	binding;cation binding;ion binding;metal ion binding;transition metal ion binding;zinc ion binding		CH;LIM		7	7	7	9.5	9.5	9.5	109.93	14.149	12380000	1838700	10541000	0	NaN	0	NaN	0	NaN	1.865	1.90017	D6RD46;Q9UPQ0-10;Q9UPQ0-2;Q9UPQ0-4;Q9UPQ0;E7EPK0;E9PDJ9;H0Y8P3;G5EA03;Q9UPQ0-9;Q9UPQ0-8;Q9UPQ0-6;Q9UPQ0-5;Q9UPQ0-3	D6RD46;Q9UPQ0-10;Q9UPQ0-2;Q9UPQ0-4;Q9UPQ0;E7EPK0;E9PDJ9;H0Y8P3;G5EA03;Q9UPQ0-9;Q9UPQ0-8;Q9UPQ0-6;Q9UPQ0-5;Q9UPQ0-3	LIM and calponin homology domains-containing protein 1	LIMCH1
NaN	NaN	NaN	NaN	NaN	NaN	1.17089	1.83236	1.32723	1.6618	0.606632	1.21686					response to chemical stimulus;response to cytokine stimulus;response to interferon-gamma;response to organic substance;response to stimulus;viral reproduction	binding;identical protein binding;protein binding;protein dimerization activity;protein homodimerization activity	cell part;cytoplasm;cytoplasmic part;cytoskeleton;Golgi apparatus;intracellular membrane-bounded organelle;intracellular non-membrane-bounded organelle;intracellular organelle;intracellular part;membrane;membrane-bounded organelle;non-membrane-bounded organelle;nucleus;organelle;perinuclear region of cytoplasm	CALCOCO1		5	5	5	22.4	22.4	22.4	30.832	44.541	17353000	4173900	13179000	0	NaN	0	NaN	1.67023	1.34349	1.13139	1.06176	D6REB0;Q13137-5;Q13137;Q13137-3;Q13137-4;Q13137-2;D6RJE7;D6RF70	D6REB0;Q13137-5;Q13137;Q13137-3;Q13137-4;Q13137-2	Calcium-binding and coiled-coil domain-containing protein 2	CALCOCO2
NaN	-0.0177384	NaN	NaN	NaN	NaN	NaN	NaN	NaN	NaN	NaN	NaN					anatomical structure morphogenesis;biological regulation;cell cycle phase;cell cycle process;cell division;cell morphogenesis;cell surface receptor linked signaling pathway;cellular component morphogenesis;cellular component organization;cellular component organization at cellular level;cellular component organization or biogenesis;cellular component organization or biogenesis at cellular level;c…	adenyl nucleotide binding;adenyl ribonucleotide binding;ATP binding;binding;catalytic activity;kinase activity;nucleotide binding;phosphotransferase activity, alcohol group as acceptor;protein kinase activity;protein serine/threonine kinase activity;purine nucleotide binding;purine ribonucleoside triphosphate binding;purine ribonucleotide binding;ribonucleotide binding;transferase activity;transf…	cell part;cell projection;centrosome;chromosomal part;cilium;condensed chromosome kinetochore;cytoplasm;cytoplasmic part;cytoskeletal part;cytosol;intracellular membrane-bounded organelle;intracellular non-membrane-bounded organelle;intracellular organelle;intracellular organelle part;intracellular part;kinetochore;macromolecular complex;membrane;membrane-bounded organelle;microtubule organizing …	Pkinase	Hedgehog signaling pathway;Wnt signaling pathway	2	2	2	9.7	9.7	9.7	27.741	4.7975	7828100	3655800	4172300	0	-0.117738	0	NaN	0	NaN	0	NaN	D6REM4;E7ETM0;P48729-3;P48729;P48729-2;U3KQ83;U3KPX3;H0Y9X2;U3KQK7;Q8N752	D6REM4;E7ETM0;P48729-3;P48729;P48729-2;U3KQ83;U3KPX3;H0Y9X2;U3KQK7;Q8N752	Casein kinase I isoform alpha;Casein kinase I isoform alpha-like	CSNK1A1;CSNK1A1L
NaN	NaN	NaN	NaN	NaN	NaN	NaN	NaN	NaN	NaN	1.43717	NaN					actin filament capping;activation of immune response;activation of innate immune response;barbed-end actin filament capping;biological regulation;cell communication;cell projection organization;cellular component organization;cellular component organization at cellular level;cellular component organization or biogenesis;cellular component organization or biogenesis at cellular level;cellular proc…	actin binding;actin monomer binding;adenyl nucleotide binding;adenyl ribonucleotide binding;ATP binding;binding;cytoskeletal protein binding;enzyme binding;kinase binding;lipid binding;molecular transducer activity;nucleotide binding;phosphatidylinositol binding;phosphatidylinositol-4,5-bisphosphate binding;phospholipid binding;protein binding;protein kinase binding;protein kinase C binding;purin…	cell part;cell projection;cell projection part;contractile fiber;cytoplasm;cytoplasmic part;cytoskeleton;extracellular membrane-bounded organelle;extracellular organelle;extracellular region part;extracellular vesicular exosome;filopodium;growth cone;integral to membrane;intracellular;intracellular non-membrane-bounded organelle;intracellular organelle;intracellular part;intrinsic to membrane;lam…	Cofilin_ADF;LRR_1;LRR_7;LRR_8;TIR		2	2	2	11.4	11.4	11.4	28.882	5.9671	2702600	693410	2009200	0	NaN	0	NaN	0	NaN	0	1.33717	D6RG15;Q6IBS0;H0Y858	D6RG15;Q6IBS0;H0Y858	Twinfilin-2	TWF2
NaN	-0.663351	NaN	-1.69231	-1.61683	-1.25991	NaN	NaN	NaN	-0.228858	NaN	-0.0460569					anatomical structure development;biological adhesion;cell adhesion;cell differentiation;cellular component disassembly;cellular component disassembly at cellular level;cellular component organization;cellular component organization at cellular level;cellular component organization or biogenesis;cellular component organization or biogenesis at cellular level;cellular developmental process;cellular…	extracellular matrix structural constituent;extracellular matrix structural constituent conferring tensile strength;structural molecule activity	anchoring collagen;cell part;collagen;collagen type XII;cytoplasmic part;endoplasmic reticulum lumen;endoplasmic reticulum part;extracellular matrix;extracellular matrix part;extracellular membrane-bounded organelle;extracellular organelle;extracellular region;extracellular region part;extracellular space;extracellular vesicular exosome;FACIT collagen;intracellular organelle lumen;intracellular o…	Collagen;fn3;VWA	Protein digestion and absorption	20	20	20	7.5	7.5	7.5	333.2	35.818	34902000	21458000	13444000	0	-0.763351	2.17505	-1.62302	0	NaN	0.630941	-0.237458	D6RGG3;Q99715-4;Q99715;A0A087X0A8;Q99715-2;H0Y4P7;H0Y5N9	D6RGG3;Q99715-4;Q99715	Collagen alpha-1(XII) chain	COL12A1
NaN	NaN	NaN	NaN	NaN	NaN	NaN	2.05106	NaN	1.26885	NaN	NaN					aging;anatomical structure formation involved in morphogenesis;apoptosis;axon cargo transport;axon transport of mitochondrion;biological regulation;cell aging;cell death;cellular component movement;cellular component organization;cellular component organization at cellular level;cellular component organization or biogenesis;cellular component organization or biogenesis at cellular level;cellular …	binding;catalytic activity;cation binding;GTP binding;GTPase activity;guanyl nucleotide binding;guanyl ribonucleotide binding;hydrolase activity;hydrolase activity, acting on acid anhydrides;hydrolase activity, acting on acid anhydrides, in phosphorus-containing anhydrides;ion binding;magnesium ion binding;metal ion binding;nucleoside-triphosphatase activity;nucleotide binding;purine nucleotide b…	cell part;cell projection;cytoplasm;cytoplasmic part;dendrite;integral to membrane;intracellular membrane-bounded organelle;intracellular organelle;intracellular organelle part;intracellular part;intrinsic to membrane;membrane;membrane part;membrane-bounded organelle;membrane-enclosed lumen;mitochondrial crista;mitochondrial inner membrane;mitochondrial intermembrane space;mitochondrial membrane;…			8	8	8	9.6	9.6	9.6	111.82	13.733	12421000	1368500	11053000	0	NaN	0	NaN	0	1.95106	0	1.16885	E5KLK1;E5KLJ6;E5KLJ9;E5KLJ5;O60313;O60313-2;H7C141	E5KLK1;E5KLJ6;E5KLJ9;E5KLJ5;O60313;O60313-2	Dynamin-like 120 kDa protein, mitochondrial;Dynamin-like 120 kDa protein, form S1	OPA1
NaN	NaN	NaN	NaN	NaN	NaN	NaN	NaN	NaN	NaN	NaN	NaN							cell part;cell projection;cilium;extracellular membrane-bounded organelle;extracellular organelle;extracellular region part;extracellular vesicular exosome;membrane-bounded organelle;membrane-bounded vesicle;organelle;vesicle	DUF1394		1	1	1	20.6	20.6	20.6	7.0858	5.4787	2061600	678790	1382800	0	NaN	0	NaN	0	NaN	0	NaN	E5RK61;E5RFS4;E5RHU5;E5RGI7;E5RJE1;E5RIR8;E5RJL8;E5RI16;Q9NUQ9	E5RK61;E5RFS4;E5RHU5;E5RGI7;E5RJE1;E5RIR8;E5RJL8;E5RI16;Q9NUQ9	Protein FAM49B	FAM49B
NaN	NaN	NaN	NaN	NaN	NaN	NaN	NaN	NaN	NaN	NaN	NaN					biological regulation;biosynthetic process;catabolic process;cellular biosynthetic process;cellular catabolic process;cellular macromolecule biosynthetic process;cellular macromolecule catabolic process;cellular macromolecule metabolic process;cellular metabolic process;cellular nitrogen compound metabolic process;cellular process;cellular protein metabolic process;cellular response to chemical s…		cell part;cytoplasmic part;cytosol;elongin complex;intracellular organelle part;intracellular part;macromolecular complex;nuclear part;nucleoplasm;nucleoplasm part;organelle part;protein complex;transcription elongation factor complex	Skp1_POZ	Pathways in cancer;Renal cell carcinoma;Ubiquitin mediated proteolysis	1	1	1	21.5	21.5	21.5	6.968	6.7086	2454700	1258500	1196200	0	NaN	0	NaN	0	NaN	0	NaN	R4GMY8;E5RHG8;Q15369	R4GMY8;E5RHG8;Q15369	Transcription elongation factor B polypeptide 1	TCEB1
NaN	NaN	NaN	NaN	NaN	NaN	NaN	NaN	NaN	NaN	NaN	NaN					amine metabolic process;aminoglycan biosynthetic process;aminoglycan catabolic process;aminoglycan metabolic process;anatomical structure morphogenesis;axon guidance;biological regulation;biosynthetic process;carbohydrate biosynthetic process;carbohydrate catabolic process;carbohydrate metabolic process;catabolic process;cell migration;cell motility;cell part morphogenesis;cell projection morphog…	binding;PDZ domain binding;protein binding;protein domain specific binding	cell body;cell part;cell surface;cytoplasmic part;Golgi apparatus part;Golgi lumen;integral to membrane;intracellular organelle lumen;intracellular organelle part;intracellular part;intrinsic to membrane;lysosomal lumen;membrane;membrane part;membrane-enclosed lumen;neuronal cell body;organelle lumen;organelle part;plasma membrane;synapse;vacuolar lumen;vacuolar part	Syndecan	Cell adhesion molecules (CAMs);ECM-receptor interaction;Malaria	1	1	1	10.9	10.9	10.9	14.905	4.7437	2477500	1124200	1353300	0	NaN	0	NaN	0	NaN	0	NaN	E5RJB8;E5RHU3;E7ESK6;E9PBI9;P34741	E5RJB8;E5RHU3;E7ESK6;E9PBI9;P34741	Syndecan;Syndecan-2	SDC2
NaN	NaN	NaN	NaN	NaN	NaN	NaN	NaN	0.275961	NaN	NaN	NaN					activation of immune response;activation of innate immune response;anaphase-promoting complex-dependent proteasomal ubiquitin-dependent protein catabolic process;biological regulation;catabolic process;cell cycle;cell cycle process;cell surface receptor linked signaling pathway;cellular catabolic process;cellular component organization;cellular component organization at cellular level;cellular co…	acid-amino acid ligase activity;catalytic activity;ligase activity;ligase activity, forming carbon-nitrogen bonds;small conjugating protein ligase activity;ubiquitin-protein ligase activity	cell part;Cul7-RING ubiquitin ligase complex;cullin-RING ubiquitin ligase complex;cytoplasmic part;cytosol;extracellular membrane-bounded organelle;extracellular organelle;extracellular region part;extracellular vesicular exosome;intracellular organelle part;intracellular part;macromolecular complex;membrane-bounded organelle;membrane-bounded vesicle;nuclear part;nucleoplasm;organelle;organelle p…	Skp1;Skp1_POZ	Cell cycle;Cell cycle - yeast;Circadian rhythm - mammal;Oocyte meiosis;Protein processing in endoplasmic reticulum;TGF-beta signaling pathway;Ubiquitin mediated proteolysis;Wnt signaling pathway	2	2	2	12.3	12.3	12.3	18.72	23.968	28268000	16124000	12145000	0	NaN	0	NaN	0	0.175961	0	NaN	E5RJR5;P63208;E7ERH2;F8W8N3;P63208-2	E5RJR5;P63208;E7ERH2;F8W8N3;P63208-2	S-phase kinase-associated protein 1	SKP1
NaN	-0.10771	NaN	NaN	NaN	NaN	NaN	NaN	NaN	NaN	NaN	NaN						binding;calcium ion binding;calcium-dependent phospholipid binding;cation binding;ion binding;lipid binding;metal ion binding;phospholipid binding		Annexin		16	1	1	33.7	3	3	51.776	39.673	10217000	5409500	4807500	0	-0.20771	0	NaN	0	NaN	0	NaN	E5RK69	E5RK69	Annexin	ANXA6
NaN	NaN	NaN	NaN	NaN	NaN	1.66453	2.85758	NaN	NaN	NaN	NaN					cellular metabolic process;cellular process;metabolic process;peptide metabolic process	aminopeptidase activity;binding;catalytic activity;cation binding;exopeptidase activity;hydrolase activity;ion binding;metal ion binding;metallopeptidase activity;peptidase activity;peptidase activity, acting on L-amino acid peptides;transition metal ion binding;zinc ion binding	blood microparticle;cell part;cytoplasm;extracellular region part;intracellular membrane-bounded organelle;intracellular organelle;intracellular organelle part;intracellular part;membrane-bounded organelle;nuclear part;nucleoplasm;nucleus;organelle;organelle part	Peptidase_M18		3	3	3	10.2	10.2	10.2	44.992	8.4923	15773000	2262000	13511000	0	NaN	0	NaN	0.765838	2.16106	0	NaN	E7EMB6;E7ETB3;Q9ULA0;B9ZVU2;F8WAN0	E7EMB6;E7ETB3;Q9ULA0	Aspartyl aminopeptidase	DNPEP
NaN	NaN	NaN	NaN	NaN	NaN	NaN	NaN	NaN	NaN	NaN	NaN					anatomical structure development;biological adhesion;biological regulation;cell adhesion;cellular component assembly;cellular component assembly at cellular level;cellular component organization;cellular component organization at cellular level;cellular component organization or biogenesis;cellular component organization or biogenesis at cellular level;cellular membrane organization;cellular proc…		acrosomal membrane;adherens junction;anchoring junction;caveola;cell junction;cell part;cell-substrate adherens junction;cell-substrate junction;cytoplasmic membrane-bounded vesicle;cytoplasmic part;cytoplasmic vesicle;cytoplasmic vesicle membrane;cytoplasmic vesicle part;endocytic vesicle;endosome;extracellular membrane-bounded organelle;extracellular organelle;extracellular region part;extracel…	Band_7	Insulin signaling pathway	2	2	2	5.6	5.6	5.6	47.142	3.4782	2300000	799050	1500900	0	NaN	0	NaN	0	NaN	0	NaN	J3QLD9;E7EMK3;Q14254;K7EKW9	J3QLD9;E7EMK3;Q14254;K7EKW9	Flotillin-2	FLOT2
NaN	-0.0289403	0.802152	1.94853	0.913952	0.929337	NaN	1.09106	1.82416	0.944334	1.24184	0.894372					binding of sperm to zona pellucida;cell recognition;cell-cell recognition;cellular macromolecule metabolic process;cellular metabolic process;cellular process;cellular process involved in reproduction;cellular protein metabolic process;'de novo' posttranslational protein folding;'de novo' protein folding;macromolecule metabolic process;metabolic process;multi-organism process;primary metabolic pr…	adenyl nucleotide binding;adenyl ribonucleotide binding;ATP binding;beta-tubulin binding;binding;cytoskeletal protein binding;G-protein beta-subunit binding;nucleotide binding;protein binding;purine nucleotide binding;purine ribonucleoside triphosphate binding;purine ribonucleotide binding;ribonucleotide binding;tubulin binding	cell body;cell part;centrosome;chaperonin-containing T-complex;cytoplasm;cytoplasmic part;cytoskeletal part;cytosol;cytosolic part;extracellular membrane-bounded organelle;extracellular organelle;extracellular region part;extracellular vesicular exosome;intracellular non-membrane-bounded organelle;intracellular organelle;intracellular organelle part;intracellular part;macromolecular complex;membr…	Cpn60_TCP1		10	10	10	25.1	25.1	25.1	53.848	17.032	146350000	47570000	98778000	0.210689	0.286606	1.11531	1.16394	0.774994	1.35761	1.8723	0.926848	E7ENZ3;P48643;B7ZAR1;E9PCA1;P48643-2;D6RIZ7	E7ENZ3;P48643;B7ZAR1;E9PCA1;P48643-2	T-complex protein 1 subunit epsilon	CCT5
0.120086	0.0590784	-0.035801	-0.121691	-0.464246	-0.124503	0.319618	0.20389	0.0866479	0.350724	0.672833	0.5065					biosynthetic process;catabolic process;cellular biosynthetic process;cellular catabolic process;cellular component biogenesis;cellular component biogenesis at cellular level;cellular component disassembly;cellular component disassembly at cellular level;cellular component organization;cellular component organization at cellular level;cellular component organization or biogenesis;cellular componen…	binding;nucleic acid binding;RNA binding;structural constituent of ribosome;structural molecule activity	cell part;cytoplasm;cytoplasmic part;cytosol;cytosolic large ribosomal subunit;extracellular membrane-bounded organelle;extracellular organelle;extracellular region part;extracellular vesicular exosome;intracellular non-membrane-bounded organelle;intracellular organelle;intracellular organelle part;intracellular part;large ribosomal subunit;macromolecular complex;membrane;membrane-bounded organel…	Ribosomal_L14e	Ribosome	6	6	6	48.4	48.4	48.4	14.558	55.177	441250000	224460000	216790000	0.43334	-0.0522121	1.01058	-0.336813	0.578308	0.103385	1.32066	0.410019	E7EPB3;P50914	E7EPB3;P50914	60S ribosomal protein L14	RPL14
NaN	-0.275245	NaN	NaN	NaN	NaN	NaN	NaN	NaN	NaN	NaN	NaN					biological regulation;biosynthetic process;cellular biosynthetic process;cellular macromolecule biosynthetic process;cellular macromolecule metabolic process;cellular metabolic process;cellular nitrogen compound metabolic process;cellular process;DNA metabolic process;DNA replication;macromolecule biosynthetic process;macromolecule metabolic process;metabolic process;nitrogen compound metabolic p…	binding;DNA binding;double-stranded DNA binding;mRNA 3'-UTR binding;mRNA binding;nucleic acid binding;nucleotide binding;RNA binding;single-stranded DNA binding;structure-specific DNA binding	cell part;cytoplasm;intracellular membrane-bounded organelle;intracellular organelle;intracellular part;membrane-bounded organelle;nucleus;organelle	RRM_1		2	2	1	19.5	19.5	11.7	13.826	9.2966	7679800	5168400	2511400	0	-0.375245	0	NaN	0	NaN	0	NaN	E7EPF2;E7ETU5;F6Y5H0;P29558-2;P29558;C9J9B2;C9JIJ9;Q6XE24-3;Q6XE24-4;Q6XE24-5;Q6XE24-2;Q6XE24	E7EPF2;E7ETU5;F6Y5H0;P29558-2;P29558;C9J9B2;C9JIJ9;Q6XE24-3;Q6XE24-4;Q6XE24-5;Q6XE24-2;Q6XE24	RNA-binding motif, single-stranded-interacting protein 1;RNA-binding motif, single-stranded-interacting protein 3	RBMS1;RBMS3
NaN	NaN	NaN	NaN	NaN	NaN	NaN	NaN	NaN	NaN	NaN	NaN					cell differentiation;cellular developmental process;cellular process;developmental process;hemopoietic progenitor cell differentiation	binding;protein binding;protein C-terminus binding	cell part;membrane	BAT2_N		2	2	2	0.8	0.8	0.8	308.77	2.1758	1741500	865160	876350	0	NaN	0	NaN	0	NaN	0	NaN	E7EPN9;Q9Y520-2;Q9Y520-3;Q9Y520-6;Q9Y520-4;Q9Y520-5;Q9Y520;Q9Y520-7;A0A0A0MS30;H7C5N8	E7EPN9;Q9Y520-2;Q9Y520-3;Q9Y520-6;Q9Y520-4;Q9Y520-5;Q9Y520;Q9Y520-7;A0A0A0MS30;H7C5N8	Protein PRRC2C	PRRC2C
NaN	NaN	NaN	NaN	NaN	NaN	NaN	1.91165	NaN	NaN	NaN	NaN					anatomical structure development;cardiac muscle tissue development;cellular metabolic process;cellular process;developmental process;electron transport chain;generation of precursor metabolites and energy;metabolic process;mitochondrial electron transport, NADH to ubiquinone;muscle tissue development;nervous system development;oxidation-reduction process;respiratory electron transport chain;small…	2 iron, 2 sulfur cluster binding;binding;catalytic activity;cation binding;electron carrier activity;ion binding;iron-sulfur cluster binding;metal cluster binding;metal ion binding;NADH dehydrogenase (quinone) activity;NADH dehydrogenase (ubiquinone) activity;NADH dehydrogenase activity;oxidoreductase activity;oxidoreductase activity, acting on NADH or NADPH;oxidoreductase activity, acting on NAD…	cell part;cytoplasmic part;intracellular membrane-bounded organelle;intracellular organelle;intracellular organelle part;intracellular part;macromolecular complex;membrane;membrane part;membrane-bounded organelle;mitochondrial inner membrane;mitochondrial membrane;mitochondrial membrane part;mitochondrial part;mitochondrial respiratory chain complex I;mitochondrion;NADH dehydrogenase complex;orga…		Alzheimer's disease;Huntington's disease;Oxidative phosphorylation;Parkinson's disease	2	2	2	9.1	9.1	9.1	27.907	3.5264	1041600	246660	794940	0	NaN	0	NaN	0	1.81165	0	NaN	E7EPT4;P19404	E7EPT4;P19404	NADH dehydrogenase [ubiquinone] flavoprotein 2, mitochondrial	NDUFV2
NaN	NaN	NaN	NaN	NaN	NaN	NaN	NaN	NaN	NaN	NaN	NaN					biosynthetic process;cellular biosynthetic process;cellular component disassembly;cellular component disassembly at cellular level;cellular component organization;cellular component organization at cellular level;cellular component organization or biogenesis;cellular component organization or biogenesis at cellular level;cellular macromolecular complex disassembly;cellular macromolecular complex …		cell part;cytoplasmic part;intracellular membrane-bounded organelle;intracellular non-membrane-bounded organelle;intracellular organelle;intracellular organelle part;intracellular part;macromolecular complex;membrane;membrane-bounded organelle;mitochondrial inner membrane;mitochondrial membrane;mitochondrial part;mitochondrion;non-membrane-bounded organelle;organelle;organelle inner membrane;orga…	L51_S25_CI-B8		2	2	2	20	20	20	12.946	2.6515	3314200	1643700	1670500	0	NaN	0	NaN	0	NaN	0	NaN	E7EPW2;P82663-3;P82663-2;P82663	E7EPW2;P82663-3;P82663-2;P82663	28S ribosomal protein S25, mitochondrial	MRPS25
NaN	NaN	NaN	NaN	NaN	NaN	NaN	NaN	NaN	NaN	NaN	NaN					anatomical structure development;anatomical structure morphogenesis;biological regulation;cargo loading into vesicle;cellular component assembly;cellular component assembly at cellular level;cellular component organization;cellular component organization at cellular level;cellular component organization or biogenesis;cellular component organization or biogenesis at cellular level;cellular macromo…		cell part;coated vesicle;coated vesicle membrane;COPI coated vesicle membrane;COPI-coated vesicle;cytoplasmic membrane-bounded vesicle;cytoplasmic part;cytoplasmic vesicle;cytoplasmic vesicle membrane;cytoplasmic vesicle part;endoplasmic reticulum;endoplasmic reticulum membrane;endoplasmic reticulum part;endoplasmic reticulum-Golgi intermediate compartment;endoplasmic reticulum-Golgi intermediate…	EMP24_GP25L		1	1	1	7.8	7.8	7.8	13.631	2.1246	1657900	873090	784830	0	NaN	0	NaN	0	NaN	0	NaN	F5GX39;E7EQ72;Q15363	F5GX39;E7EQ72;Q15363	Transmembrane emp24 domain-containing protein 2	TMED2
NaN	NaN	NaN	NaN	NaN	-2.03611	-1.9837	-3.17645	-0.867147	NaN	NaN	NaN					anatomical structure homeostasis;anatomical structure morphogenesis;antibacterial humoral response;antifungal humoral response;antimicrobial humoral response;biological regulation;biosynthetic process;bone morphogenesis;cation homeostasis;cellular biosynthetic process;cellular cation homeostasis;cellular chemical homeostasis;cellular component organization;cellular component organization at cellu…	binding;carbohydrate binding;catalytic activity;cation binding;DNA binding;endopeptidase activity;enzyme activator activity;enzyme regulator activity;glycosaminoglycan binding;heparin binding;hydrolase activity;ion binding;iron ion binding;kinase activator activity;kinase regulator activity;metal ion binding;nucleic acid binding;pattern binding;peptidase activity;peptidase activity, acting on L-a…	cell part;cytoplasm;cytoplasmic membrane-bounded vesicle;cytoplasmic membrane-bounded vesicle lumen;cytoplasmic part;cytoplasmic vesicle;cytoplasmic vesicle part;endocytic vesicle lumen;extracellular membrane-bounded organelle;extracellular organelle;extracellular region;extracellular region part;extracellular space;extracellular vesicular exosome;intracellular membrane-bounded organelle;intracel…	Transferrin		23	23	22	42	42	40.2	76.625	244.52	123570000	116850000	6715900	0	NaN	0	-2.13611	1.06006	-2.1091	0	NaN	E7EQB2;E7ER44;P02788;P02788-2;C9JCF5	E7EQB2;E7ER44;P02788;P02788-2	Lactotransferrin;Lactoferricin-H;Kaliocin-1;Lactoferroxin-A;Lactoferroxin-B;Lactoferroxin-C	LTF
NaN	NaN	NaN	NaN	NaN	NaN	NaN	NaN	NaN	NaN	NaN	NaN					biological regulation;biosynthetic process;cellular biosynthetic process;cellular macromolecule biosynthetic process;cellular macromolecule metabolic process;cellular metabolic process;cellular nitrogen compound metabolic process;cellular process;defense response;gene expression;immune response;immune system process;innate immune response;macromolecule biosynthetic process;macromolecule metabolic…	binding;catalytic activity;DNA binding;DNA-directed RNA polymerase activity;nucleic acid binding;nucleotidyltransferase activity;RNA polymerase activity;transferase activity;transferase activity, transferring phosphorus-containing groups	cell part;cytoplasmic part;cytosol;DNA-directed RNA polymerase complex;DNA-directed RNA polymerase I complex;DNA-directed RNA polymerase III complex;intracellular organelle part;intracellular part;macromolecular complex;nuclear DNA-directed RNA polymerase complex;nuclear part;nucleolar part;nucleoplasm;nucleoplasm part;organelle part;protein complex;RNA polymerase complex	RNA_pol_A_bac;RNA_pol_L	Cytosolic DNA-sensing pathway;Purine metabolism;Pyrimidine metabolism;RNA polymerase	3	3	3	13.2	13.2	13.2	33.839	3.6091	1982600	1157600	825000	0	NaN	0	NaN	0	NaN	0	NaN	E7EQB9;O15160-2;O15160;D6RDJ3;H0Y723	E7EQB9;O15160-2;O15160;D6RDJ3	DNA-directed RNA polymerases I and III subunit RPAC1	POLR1C
NaN	0.0480967	NaN	NaN	NaN	NaN	NaN	NaN	NaN	NaN	NaN	NaN					actin cytoskeleton organization;actin cytoskeleton reorganization;actin filament bundle assembly;actin filament organization;actin filament-based process;anatomical structure development;axon guidance;biological adhesion;biological regulation;cell adhesion;cell development;cell projection assembly;cell projection organization;cell-cell adhesion;cellular component assembly;cellular component assem…	actin binding;actin filament binding;binding;cell adhesion molecule binding;cytoskeletal protein binding;protein binding	actin cytoskeleton;actin filament;adherens junction;anchoring junction;apical part of cell;apical plasma membrane;basolateral plasma membrane;brush border;cell body;cell cortex part;cell junction;cell part;cell periphery;cell pole;cell projection;cell projection membrane;cell projection part;cell tip;cell-substrate adherens junction;cell-substrate junction;cortical cytoskeleton;cytoplasm;cytoplas…	ERM;FERM_C;FERM_M;FERM_N	Gastric acid secretion;Leukocyte transendothelial migration;Pathogenic Escherichia coli infection;Regulation of actin cytoskeleton	10	4	3	12.3	5.5	4.3	69.371	4.7524	12362000	6481400	5880800	0	-0.0519033	0	NaN	0	NaN	0	NaN	E7EQR4;P15311;E9PQ82;E9PNV3;P35241-3	E7EQR4;P15311	Ezrin	EZR
NaN	NaN	NaN	NaN	NaN	NaN	NaN	NaN	NaN	NaN	NaN	NaN					activation of protein kinase activity;anatomical structure development;autophagy;biological regulation;catabolic process;cell migration;cell motility;cell surface receptor linked signaling pathway;cellular catabolic process;cellular component movement;cellular component organization;cellular component organization at cellular level;cellular component organization or biogenesis;cellular component …	adenyl nucleotide binding;adenyl ribonucleotide binding;ATP binding;binding;catalytic activity;cation binding;cytoskeletal protein binding;enzyme activator activity;enzyme regulator activity;gamma-tubulin binding;ion binding;kinase activator activity;kinase activity;kinase regulator activity;lipid binding;magnesium ion binding;metal ion binding;microtubule binding;nucleotide binding;phosphatidic …	actin filament;basal cortex;cell cortex part;cell part;cell projection;centrosome;cytoplasm;cytoplasmic part;cytoskeletal part;cytoskeleton;cytosol;extracellular membrane-bounded organelle;extracellular organelle;extracellular region part;extracellular vesicular exosome;intracellular membrane-bounded organelle;intracellular non-membrane-bounded organelle;intracellular organelle;intracellular orga…	KA1;Pkinase;UBA		2	2	2	2.9	2.9	2.9	78.452	3.7542	2686400	1069200	1617100	0	NaN	0	NaN	0	NaN	0	NaN	E7ETY4;E9PC69;Q7KZI7-10;Q7KZI7-13;Q7KZI7-7;Q7KZI7-2;Q7KZI7-15;Q7KZI7-5;Q7KZI7-16;Q7KZI7-4;Q7KZI7-9;Q7KZI7-12;Q7KZI7-14;Q7KZI7-3;Q7KZI7-6;Q7KZI7-11;Q7KZI7-8;Q7KZI7;K7EK17;K7EKG8;F5H6N2;H0YKJ3;F5H4F6;H0YNV4;A0A0A0MST9;A0A0A0MQR8;A0A0A0MSZ1;A0A0A0MT23;J3KNR0;B4DIB3;A0A087X0I6;P27448-8;Q96L34-2;P27448-6;P27448-3;P27448-4;Q96L34;P27448-2;P27448;P27448-7;Q9P0L2	E7ETY4;E9PC69;Q7KZI7-10;Q7KZI7-13;Q7KZI7-7;Q7KZI7-2;Q7KZI7-15;Q7KZI7-5;Q7KZI7-16;Q7KZI7-4;Q7KZI7-9;Q7KZI7-12;Q7KZI7-14;Q7KZI7-3;Q7KZI7-6;Q7KZI7-11;Q7KZI7-8;Q7KZI7;K7EK17;K7EKG8;F5H6N2;H0YKJ3;F5H4F6;H0YNV4;A0A0A0MST9;A0A0A0MQR8;A0A0A0MSZ1;A0A0A0MT23;J3KNR0;B4DIB3;A0A087X0I6;P27448-8;Q96L34-2;P27448-6;P27448-3;P27448-4;Q96L34;P27448-2;P27448;P27448-7;Q9P0L2	Serine/threonine-protein kinase MARK2;MAP/microtubule affinity-regulating kinase 3;MAP/microtubule affinity-regulating kinase 4;Serine/threonine-protein kinase MARK1	MARK2;MARK4;MARK3;MARK1
NaN	NaN	NaN	NaN	NaN	NaN	NaN	-0.274372	NaN	NaN	NaN	NaN					axon guidance;biological regulation;biosynthetic process;cell cycle;cell cycle checkpoint;cell surface receptor linked signaling pathway;cellular biosynthetic process;cellular macromolecule biosynthetic process;cellular macromolecule metabolic process;cellular metabolic process;cellular nitrogen compound metabolic process;cellular process;cellular protein metabolic process;cellular response to st…	adenyl nucleotide binding;adenyl ribonucleotide binding;ATP binding;binding;catalytic activity;heat shock protein binding;Hsp90 protein binding;kinase activity;nucleotide binding;phosphotransferase activity, alcohol group as acceptor;protein binding;protein kinase activity;protein N-terminus binding;protein serine/threonine kinase activity;purine nucleotide binding;purine ribonucleoside triphosph…	cell part;chromatin remodeling complex;chromosomal part;cytoplasmic part;cytosol;histone deacetylase complex;intracellular membrane-bounded organelle;intracellular organelle;intracellular organelle part;intracellular part;macromolecular complex;membrane;membrane-bounded organelle;nuclear chromosome part;nuclear part;nucleoplasm part;nucleus;NuRD complex;organelle;organelle part;plasma membrane;pr…	Pkinase	Adherens junction;Circadian rhythm - plant;Measles;Ribosome biogenesis in eukaryotes;Tight junction;Wnt signaling pathway	2	2	2	4.7	4.7	4.7	45.31	4.6409	2631600	1630000	1001600	0	NaN	0	NaN	0	-0.374372	0	NaN	E7EU96;Q5U5J2;Q8NEV1;P68400	E7EU96;Q5U5J2;Q8NEV1;P68400	Casein kinase II subunit alpha 3;Casein kinase II subunit alpha	CSNK2A1;CSNK2A3
NaN	0.297367	NaN	-0.578219	-0.67768	-0.758038	0.445515	0.373398	0.255682	0.33182	0.137897	0.332393					cell cycle process;cell division;cellular component movement;cellular component organization;cellular component organization at cellular level;cellular component organization or biogenesis;cellular component organization or biogenesis at cellular level;cellular process;cytoskeleton organization;establishment of localization;establishment of localization in cell;establishment of organelle localiza…	structural molecule activity	cell part;cytoplasm;cytoskeletal part;cytoskeleton;extracellular membrane-bounded organelle;extracellular organelle;extracellular region part;extracellular vesicular exosome;intracellular non-membrane-bounded organelle;intracellular organelle;intracellular organelle part;intracellular part;macromolecular complex;membrane;membrane-bounded organelle;membrane-bounded vesicle;microtubule;microtubule …	Tubulin-binding		19	19	10	10.8	10.8	5.5	245.44	46.059	115530000	50705000	64829000	0	0.197367	2.34529	-0.771312	1.36679	0.258198	0.911242	0.16737	E7EVA0;P27816;P27816-6;P27816-2;P27816-4	E7EVA0;P27816;P27816-6;P27816-2	Microtubule-associated protein;Microtubule-associated protein 4	MAP4
NaN	NaN	NaN	NaN	NaN	NaN	NaN	NaN	NaN	NaN	NaN	NaN					assembly of spliceosomal tri-snRNP;cellular component assembly;cellular component assembly at cellular level;cellular component organization;cellular component organization at cellular level;cellular component organization or biogenesis;cellular component organization or biogenesis at cellular level;cellular macromolecular complex assembly;cellular macromolecular complex subunit organization;cell…	binding;ribonucleoprotein binding;snRNP binding	Cajal body;cell part;histone methyltransferase complex;intracellular membrane-bounded organelle;intracellular organelle;intracellular organelle part;intracellular part;macromolecular complex;membrane-bounded organelle;methyltransferase complex;MLL1 complex;nuclear body;nuclear part;nuclear speck;nucleoplasm part;nucleus;organelle;organelle part;protein complex;ribonucleoprotein complex;small nucl…	Nop;NOSIC;Prp31_C	Spliceosome	2	2	2	4.1	4.1	4.1	54.766	2.2607	2978300	2111000	867310	0	NaN	0	NaN	0	NaN	0	NaN	E7EVX8;Q8WWY3;Q8WWY3-3;Q8WWY3-2;Q8WWY3-4	E7EVX8;Q8WWY3;Q8WWY3-3;Q8WWY3-2;Q8WWY3-4	U4/U6 small nuclear ribonucleoprotein Prp31	PRPF31
NaN	NaN	-0.515852	-0.492261	NaN	-0.633412	0.23952	0.479955	0.349818	-0.296297	-0.181935	NaN					biological regulation;biosynthetic process;cellular biosynthetic process;cellular macromolecule biosynthetic process;cellular macromolecule metabolic process;cellular metabolic process;cellular nitrogen compound metabolic process;cellular process;defense response;immune response;immune system process;innate immune response;macromolecule biosynthetic process;macromolecule metabolic process;metabol…	adenyl nucleotide binding;adenyl ribonucleotide binding;ATP binding;ATPase activity;ATPase activity, coupled;ATP-dependent helicase activity;ATP-dependent RNA helicase activity;binding;catalytic activity;core promoter binding;DNA binding;DNA-dependent ATPase activity;double-stranded RNA binding;enzyme binding;G-quadruplex DNA binding;G-quadruplex RNA binding;helicase activity;histone deacetylase …	cell part;chromosomal part;chromosome, telomeric region;cytoplasm;cytoplasmic part;cytosol;extracellular membrane-bounded organelle;extracellular organelle;extracellular region part;extracellular vesicular exosome;intracellular membrane-bounded organelle;intracellular organelle;intracellular organelle part;intracellular part;membrane-bounded organelle;membrane-bounded vesicle;nucleus;organelle;or…	DEAD;HA2;Helicase_C;OB_NTP_bind	RNA degradation	10	10	10	16.1	16.1	16.1	91.43	35.148	15974000	8526600	7447700	0	-0.615852	1.17051	-0.662837	1.17903	0.256431	0.973282	-0.339116	E7EWK3;Q9H2U1-3;Q9H2U1-2;Q9H2U1;A0A0G2JRP3;H7C5F5;A0A0G2JQU7	E7EWK3;Q9H2U1-3;Q9H2U1-2;Q9H2U1	ATP-dependent RNA helicase DHX36	DHX36
NaN	NaN	NaN	NaN	NaN	NaN	1.65008	NaN	NaN	NaN	NaN	NaN					axon guidance;biological regulation;cell surface receptor linked signaling pathway;cellular process;cellular response to stimulus;chemotaxis;enzyme linked receptor protein signaling pathway;intracellular signal transduction;locomotion;nerve growth factor receptor signaling pathway;positive regulation of apoptosis;positive regulation of biological process;positive regulation of catalytic activity;…	adenyl nucleotide binding;adenyl ribonucleotide binding;ATP binding;binding;catalytic activity;enzyme regulator activity;GTPase regulator activity;guanyl-nucleotide exchange factor activity;kinase activity;nucleoside-triphosphatase regulator activity;nucleotide binding;phosphotransferase activity, alcohol group as acceptor;protein kinase activity;protein serine/threonine kinase activity;purine nu…	cell part;cytoplasmic part;cytosol;intracellular part	CRAL_TRIO_2;I-set;Pkinase;RhoGEF;SH3_1;Spectrin		2	2	2	1.3	1.3	1.3	174.9	2.1701	2894400	1226200	1668200	0	NaN	0	NaN	0	1.55008	0	NaN	F5H228;E7EWP2;O75962-5;O75962-2;O75962-4;O75962;E7EPJ7	F5H228;E7EWP2;O75962-5;O75962-2;O75962-4;O75962;E7EPJ7	Triple functional domain protein	TRIO
NaN	NaN	NaN	NaN	NaN	NaN	NaN	0.510253	NaN	NaN	0.804962	NaN					cellular component movement;cellular process;multicellular organismal process;muscle contraction;muscle system process;system process	actin binding;binding;calmodulin binding;cytoskeletal protein binding;protein binding;tropomyosin binding	actin cap;actin cytoskeleton;cell cortex part;cell part;contractile fiber;cytoplasmic part;cytoskeletal part;cytoskeleton;cytosol;intracellular non-membrane-bounded organelle;intracellular organelle;intracellular organelle part;intracellular part;membrane;myofibril;non-membrane-bounded organelle;organelle;organelle part;plasma membrane	Caldesmon	Vascular smooth muscle contraction	4	4	4	11	11	11	61.705	18.049	12403000	4344400	8058600	0	NaN	0	NaN	0	0.410253	0	0.704962	E9PGZ1;E7EX44;Q05682-5;Q05682-4;Q05682-3;Q05682-6;Q05682-2;Q05682;C9J813	E9PGZ1;E7EX44;Q05682-5;Q05682-4;Q05682-3;Q05682-6;Q05682-2;Q05682;C9J813	Caldesmon	CALD1
NaN	NaN	NaN	NaN	NaN	NaN	NaN	NaN	NaN	NaN	NaN	NaN					anatomical structure development;antigen processing and presentation;antigen processing and presentation of exogenous antigen;antigen processing and presentation of exogenous peptide antigen;antigen processing and presentation of exogenous peptide antigen via MHC class II;antigen processing and presentation of peptide antigen;antigen processing and presentation of peptide antigen via MHC class II…	catalytic activity;hydrolase activity;hydrolase activity, acting on acid anhydrides;hydrolase activity, acting on acid anhydrides, in phosphorus-containing anhydrides;motor activity;nucleoside-triphosphatase activity;pyrophosphatase activity	cell leading edge;cell part;centrosome;chromosomal part;cytoplasm;cytoplasmic part;cytoskeletal part;cytosol;dynactin complex;dynein complex;intracellular non-membrane-bounded organelle;intracellular organelle;intracellular organelle part;intracellular part;kinetochore;macromolecular complex;membrane;microtubule;microtubule associated complex;microtubule organizing center;non-membrane-bounded org…	CAP_GLY;Dynactin	Huntington's disease;Vasopressin-regulated water reabsorption	2	2	2	2.5	2.5	2.5	98.517	2.7867	1790600	1351100	439460	0	NaN	0	NaN	0	NaN	0	NaN	Q6AWB1;E7EX90;Q14203-5;Q14203-2;Q14203-3;Q14203-4;Q14203-6;Q14203	Q6AWB1;E7EX90;Q14203-5;Q14203-2;Q14203-3;Q14203-4;Q14203-6;Q14203	Dynactin subunit 1	DKFZp686E0752;DCTN1
NaN	NaN	NaN	NaN	NaN	NaN	NaN	NaN	NaN	NaN	NaN	NaN					biosynthetic process;cellular biosynthetic process;cellular lipid metabolic process;cellular metabolic process;cellular process;glycerolipid biosynthetic process;glycerolipid metabolic process;glycerophospholipid biosynthetic process;glycerophospholipid metabolic process;lipid biosynthetic process;lipid metabolic process;lipid modification;lipid phosphorylation;metabolic process;organophosphate m…	1-phosphatidylinositol 4-kinase activity;adenyl nucleotide binding;adenyl ribonucleotide binding;AP-3 adaptor complex binding;ATP binding;binding;catalytic activity;cation binding;inositol or phosphatidylinositol kinase activity;ion binding;kinase activity;lipid kinase activity;magnesium ion binding;metal ion binding;nucleotide binding;phosphatidylinositol kinase activity;phosphotransferase activ…	cell body;cell junction;cell part;cell pole;cell projection;cell tip;cytoplasmic membrane-bounded vesicle;cytoplasmic part;cytoplasmic vesicle;cytosol;dendrite;endosome;extracellular region part;Golgi apparatus;growing cell tip;host cell membrane;host cell part;host cell presynaptic membrane;integral to membrane;integral to plasma membrane;intracellular membrane-bounded organelle;intracellular or…	PI3_PI4_kinase	Inositol phosphate metabolism;Phosphatidylinositol signaling system	3	3	3	6.7	6.7	6.7	51.218	4.6815	3629900	0	3629900	0	NaN	0	NaN	0	NaN	0	NaN	E9PAM4;Q9BTU6	E9PAM4;Q9BTU6	Phosphatidylinositol 4-kinase type 2-alpha	PI4K2A
NaN	-0.178861	-0.159589	NaN	NaN	NaN	NaN	NaN	NaN	NaN	NaN	NaN					anatomical structure development;anatomical structure morphogenesis;biological regulation;biosynthetic process;cardiac chamber development;cardiac ventricle development;cellular biosynthetic process;cellular macromolecule biosynthetic process;cellular macromolecule metabolic process;cellular metabolic process;cellular nitrogen compound metabolic process;cellular process;cellular protein metabolic…	binding;DNA binding;nucleic acid binding;protein binding;protein binding transcription factor activity;TBP-class protein binding;transcription coactivator activity;transcription cofactor activity;transcription factor binding;transcription factor binding transcription factor activity	cell part;cytoplasm;cytoplasmic part;extracellular membrane-bounded organelle;extracellular organelle;extracellular region part;extracellular vesicular exosome;intracellular membrane-bounded organelle;intracellular organelle;intracellular part;macromolecular complex;membrane-bounded organelle;membrane-bounded vesicle;nascent polypeptide-associated complex;nucleus;organelle;protein complex;vesicle	NAC		3	3	3	30.9	30.9	30.9	15.016	59.105	13171000	7968300	5202200	1.64252	-0.269225	0	NaN	0	NaN	0	NaN	F8VZJ2;F8W0W4;H0YHX9;Q13765;E9PAV3-2;E9PAV3;F8W1N5;F8VNW4	F8VZJ2;F8W0W4;H0YHX9;Q13765;E9PAV3-2;E9PAV3;F8W1N5;F8VNW4	Nascent polypeptide-associated complex subunit alpha;Nascent polypeptide-associated complex subunit alpha, muscle-specific form	NACA
NaN	NaN	NaN	NaN	NaN	NaN	NaN	0.764686	NaN	NaN	NaN	NaN					alcohol catabolic process;alcohol metabolic process;apoptotic mitochondrial changes;biological regulation;body fluid secretion;carbohydrate catabolic process;carbohydrate homeostasis;carbohydrate metabolic process;carbohydrate transport;catabolic process;cellular carbohydrate catabolic process;cellular carbohydrate metabolic process;cellular chemical homeostasis;cellular component organization;ce…	adenyl nucleotide binding;adenyl ribonucleotide binding;ATP binding;binding;carbohydrate binding;carbohydrate kinase activity;catalytic activity;fructokinase activity;glucokinase activity;glucose binding;hexokinase activity;kinase activity;mannokinase activity;monosaccharide binding;nucleotide binding;phosphotransferase activity, alcohol group as acceptor;purine nucleotide binding;purine ribonucl…	cell part;cytoplasmic part;cytosol;intracellular organelle part;intracellular part;membrane;mitochondrial membrane;mitochondrial outer membrane;mitochondrial part;organelle membrane;organelle outer membrane;organelle part;outer membrane	Hexokinase_1;Hexokinase_2	Amino sugar and nucleotide sugar metabolism;Butirosin and neomycin biosynthesis;Carbohydrate digestion and absorption;Fructose and mannose metabolism;Galactose metabolism;Glycolysis / Gluconeogenesis;Insulin signaling pathway;Starch and sucrose metabolism;Streptomycin biosynthesis;Type II diabetes mellitus	4	4	3	5.3	5.3	4	98.972	5.416	3325900	1098600	2227300	0	NaN	0	NaN	0	0.664686	0	NaN	E9PB90;P52789;P52790	E9PB90;P52789	Hexokinase;Hexokinase-2	HK2
NaN	NaN	NaN	NaN	NaN	NaN	NaN	NaN	NaN	NaN	-0.405184	NaN					establishment of localization;establishment of localization in cell;establishment of RNA localization;intracellular transport;mRNA export from nucleus;mRNA transport;nuclear export;nuclear transport;nucleic acid transport;nucleobase-containing compound transport;nucleocytoplasmic transport;poly(A)+ mRNA export from nucleus;RNA export from nucleus;RNA transport;transport	binding;cation binding;ion binding;metal ion binding				3	3	3	6.2	6.2	6.2	57.427	4.7034	2832300	1583500	1248800	0	NaN	0	NaN	0	NaN	0	-0.505184	E9PBY7;E9PQ61;O75152	E9PBY7;E9PQ61;O75152	Zinc finger CCCH domain-containing protein 11A	ZC3H11A
NaN	NaN	NaN	NaN	NaN	NaN	NaN	NaN	NaN	1.88803	1.65695	NaN					ATP-dependent chromatin remodeling;biological regulation;biosynthetic process;cell proliferation;cellular biosynthetic process;cellular component assembly;cellular component assembly at cellular level;cellular component organization;cellular component organization at cellular level;cellular component organization or biogenesis;cellular component organization or biogenesis at cellular level;cellul…	binding;nucleic acid binding;RNA binding	cell part;chromatin remodeling complex;ESC/E(Z) complex;histone deacetylase complex;histone methyltransferase complex;intracellular membrane-bounded organelle;intracellular organelle;intracellular organelle part;intracellular part;macromolecular complex;membrane-bounded organelle;methyltransferase complex;nuclear part;nucleoplasm;nucleoplasm part;nucleus;NuRD complex;organelle;organelle part;PcG …	CAF1C_H4-bd;WD40		11	4	4	28.4	15.6	15.6	46.938	8.2904	33108000	5519400	27589000	0	NaN	0	NaN	0	NaN	1.35744	1.67249	E9PC52;Q16576;Q16576-2;Q5JP01;Q5JNZ6	E9PC52;Q16576;Q16576-2	Histone-binding protein RBBP7	RBBP7
NaN	NaN	NaN	NaN	NaN	NaN	-1.28831	-1.33246	-1.43351	NaN	NaN	NaN			+		anatomical structure development;anatomical structure morphogenesis;axonogenesis;cell cycle process;cell migration;cell motility;cell part morphogenesis;cell projection morphogenesis;cell projection organization;cellular component morphogenesis;cellular component movement;cellular component organization;cellular component organization at cellular level;cellular component organization or biogenesi…	adenyl nucleotide binding;adenyl ribonucleotide binding;ATP binding;ATPase activity;ATPase activity, coupled;binding;catalytic activity;cation binding;chromatin binding;DNA bending activity;DNA binding;DNA topoisomerase (ATP-hydrolyzing) activity;DNA topoisomerase activity;DNA-dependent ATPase activity;enzyme binding;histone deacetylase binding;hydrolase activity;hydrolase activity, acting on aci…	cell part;cytoplasm;cytoplasmic part;cytosol;DNA topoisomerase complex (ATP-hydrolyzing);intracellular membrane-bounded organelle;intracellular organelle;intracellular organelle part;intracellular part;macromolecular complex;membrane-bounded organelle;nuclear part;nucleoplasm;nucleus;organelle;organelle part;protein complex	DNA_gyraseB;DNA_topoisoIV;DTHCT;HATPase_c;Toprim		12	3	3	11.3	3	3	130.48	7.3543	3529600	2633300	896310	0	NaN	0	NaN	3.05776	-1.45143	0	NaN	E9PCY5;Q02880-2;Q02880	E9PCY5;Q02880-2;Q02880	DNA topoisomerase 2;DNA topoisomerase 2-beta	TOP2B
NaN	-0.319676	NaN	NaN	NaN	NaN	NaN	NaN	NaN	NaN	NaN	NaN					cell cycle;cell cycle process;cell division;cellular component organization;cellular component organization at cellular level;cellular component organization or biogenesis;cellular component organization or biogenesis at cellular level;cellular macromolecular complex subunit organization;cellular macromolecule metabolic process;cellular metabolic process;cellular nitrogen compound metabolic proce…	adenyl nucleotide binding;adenyl ribonucleotide binding;ATP binding;binding;nucleotide binding;protein binding;protein dimerization activity;protein heterodimerization activity;purine nucleotide binding;purine ribonucleoside triphosphate binding;purine ribonucleotide binding;ribonucleotide binding	cell part;chromosomal part;chromosome;condensin complex;cytoplasm;cytoplasmic part;cytosol;intracellular membrane-bounded organelle;intracellular non-membrane-bounded organelle;intracellular organelle;intracellular organelle part;intracellular part;macromolecular complex;membrane-bounded organelle;non-membrane-bounded organelle;nuclear part;nucleoplasm;nucleus;organelle;organelle part;protein com…	SMC_hinge;SMC_N	Cell cycle - yeast	2	2	2	1.7	1.7	1.7	144.45	3.4207	2142400	1044500	1097900	0	-0.419676	0	NaN	0	NaN	0	NaN	E9PD53;Q9NTJ3-2;Q9NTJ3	E9PD53;Q9NTJ3-2;Q9NTJ3	Structural maintenance of chromosomes protein;Structural maintenance of chromosomes protein 4	SMC4
NaN	-0.00410306	NaN	NaN	NaN	0.287472	1.11969	1.12446	1.12525	1.59096	1.61122	1.50396			+	+	actin cytoskeleton organization;actin filament bundle assembly;actin filament organization;actin filament-based movement;actin filament-based process;cellular component assembly;cellular component assembly at cellular level;cellular component movement;cellular component organization;cellular component organization at cellular level;cellular component organization or biogenesis;cellular component …	actin binding;actin filament binding;adenyl nucleotide binding;adenyl ribonucleotide binding;ATP binding;binding;catalytic activity;cytoskeletal protein binding;hydrolase activity;hydrolase activity, acting on acid anhydrides;hydrolase activity, acting on acid anhydrides, in phosphorus-containing anhydrides;lipid binding;microfilament motor activity;motor activity;nucleoside-triphosphatase activi…	actin filament;brush border;cell part;cell periphery;cell projection;cytoplasm;cytoplasmic part;cytoskeletal part;early endosome;endosomal part;endosome;endosome membrane;extracellular membrane-bounded organelle;extracellular organelle;extracellular region part;extracellular vesicular exosome;filopodium;intracellular membrane-bounded organelle;intracellular organelle;intracellular organelle part;…	IQ;Myosin_head;Myosin_TH1		36	36	32	37.3	37.3	33.1	128.48	256.22	876450000	377170000	499280000	0	-0.104103	0	0.187472	5.53965	1.02313	3.29978	1.46871	E9PDF6;O43795;O43795-2;E7EQD9;H7C2Y7;A0A0U1RRI3;C9JYW1;C9JUP5	E9PDF6;O43795;O43795-2	Unconventional myosin-Ib	MYO1B
NaN	NaN	NaN	NaN	NaN	NaN	NaN	NaN	NaN	NaN	NaN	NaN					biological regulation;cell cycle phase;cell cycle process;cell division;cellular component organization;cellular component organization at cellular level;cellular component organization or biogenesis;cellular component organization or biogenesis at cellular level;cellular process;chromosome segregation;mitosis;nuclear division;organelle fission;organelle organization;positive regulation of biolog…		cell part;chromosome;cytoplasm;intracellular non-membrane-bounded organelle;intracellular organelle;intracellular organelle part;intracellular part;non-membrane-bounded organelle;nuclear part;nucleoplasm;organelle;organelle part	PP1_bind		3	3	3	3.8	3.8	3.8	111.01	8.2758	3894500	2516300	1378300	0	NaN	0	NaN	0	NaN	0	NaN	E9PEI0;Q69YH5	E9PEI0;Q69YH5	Cell division cycle-associated protein 2	CDCA2
NaN	NaN	NaN	NaN	NaN	NaN	NaN	NaN	NaN	NaN	NaN	NaN					acetyl-CoA catabolic process;acetyl-CoA metabolic process;amine catabolic process;amine metabolic process;anatomical structure morphogenesis;aspartate family amino acid catabolic process;aspartate family amino acid metabolic process;biological regulation;branched chain family amino acid catabolic process;branched chain family amino acid metabolic process;carboxylic acid catabolic process;carboxyl…	binding;catalytic activity;coenzyme binding;cofactor binding;dihydrolipoyl dehydrogenase activity;flavin adenine dinucleotide binding;oxidoreductase activity;oxidoreductase activity, acting on a sulfur group of donors;oxidoreductase activity, acting on a sulfur group of donors, NAD or NADP as acceptor;oxidoreductase activity, acting on NADH or NADPH	acrosomal matrix;cell part;cell projection;cilium;cytoplasmic part;cytoplasmic vesicle part;intracellular membrane-bounded organelle;intracellular organelle;intracellular organelle lumen;intracellular organelle part;intracellular part;membrane-bounded organelle;membrane-enclosed lumen;mitochondrial matrix;mitochondrial part;mitochondrion;nuclear part;nucleoplasm;organelle;organelle lumen;organell…	Pyr_redox;Pyr_redox_2;Pyr_redox_dim	Citrate cycle (TCA cycle);Glycine, serine and threonine metabolism;Glycolysis / Gluconeogenesis;Pyruvate metabolism;Valine, leucine and isoleucine degradation	1	1	1	2.3	2.3	2.3	51.815	3.036	1621400	605200	1016200	0	NaN	0	NaN	0	NaN	0	NaN	E9PEX6;P09622-2;P09622	E9PEX6;P09622-2;P09622	Dihydrolipoyl dehydrogenase;Dihydrolipoyl dehydrogenase, mitochondrial	DLD
[truncated: 1,361 more rows]

## Sheet: table legend
Column	Description
log2 Ratio H (RTN) / L (HA-empty vector control) normalized RTN_01	Ratio of immunoprecipitated proteins between heavy labeled RTN3 and light HA-empty vector control
T-test Significant	+ indicates proteins being significant for a FDR<0.05
GOBP name	GOBP annotation (mouse Uniprot)
GOCC name	GOMF annotation (mouse Uniprot)
GOMF name	GOCC annotation (mouse Uniprot)
KEGG name	KEGG annotation (mouse uniprot)
Pfam	Pfam annotation (mouse uniprot)
Peptides	Number of identified peptides
Razor + unique peptides	Number of identified razor and unique peptides
Unique peptides	Number of identified unique peptides
Score	The Andromeda score of the best identified modified peptide containing this site
Intensity	Sum of intensities for all identified peptides
Intensity L	Sum of intensities for all light identified peptides
Intensity H	Sum of intensities for all heavy identified peptides
-Log10 t-test p value	negative log 10 p value
log2 Ratio	normalized log2 Protein Ratio
[truncated: 4 more rows]
