# Supplementary material for: Full length RTN3 regulates turnover of tubular endoplasmic reticulum via selective autophagy
Source: eLife. 2017 Jun 15;6:e25555. doi: 10.7554/eLife.25555 (PMC5517149; doi:10.7554/eLife.25555)
Supplement: Figure 7—source data 1. — Comparison of the IP-interactomes analyses were performed using the SILAC-labeling strategy in U2OS after 24 hr treatment with 1 µg/ml of doxycycline. Bafilomycin A1, 200 ng/ml, was added for 2 hr. Peptides with Log2 (Heavy/Light [H/L]) ratios ≥1 and a p value ≤ 0.05 were considered significantly enriched. DOI: http://dx.doi.org/10.7554/eLife.25555.030 [file elife-25555-fig7-data1.xlsx]

## Sheet: Figure 7 – source data 1
log2 Ratio H (RTN3B)/ L (HA-empty vector) normalized RTN3B long_01	log2 Ratio H (RTN3B)/ L (HA-empty vector) normalized RTN3B long_02	log2 Ratio H (RTN3B)/ L (HA-empty vector) normalized RTN3B long_03	log2 Ratio H (RTN3A)/ L (HA-empty vector) normalized RTN3A short_01	log2 Ratio H (RTN3A)/ L (HA-empty vector) normalized RTN3A short_02	log2 Ratio H (RTN3A)/ L (HA-empty vector) normalized RTN3A short_03	T-test Significant_RTN3B	T-test Significant_RTN3A	Peptides	Razor + unique peptides	Unique peptides	Sequence coverage [%]	Unique + razor sequence coverage [%]	Unique sequence coverage [%]	Mol. weight [kDa]	Score	Intensity	Intensity L	Intensity H	-Log10 T-test p-value_RTN3B	log2 Ratio_RTN3B	-Log10 T-test p-value_RTN3A	log2 Ratio RTN3A	Protein IDs	Majority protein IDs	Protein names	Gene names
5.86451	5.85355	5.82199	8.02525	7.96417	8.06953	+	+	99	99	87	76.3	76.3	66.4	110.65	323.31	3916800000000	93674000000	3823100000000	5.32317	5.84668	4.83846	8.01965	O95197-2;O95197;O95197-7;F5H891;O95197-4;F5GWG7;F5H617	O95197-2;O95197;O95197-7	Reticulon-3	RTN3
5.90987	5.96834	5.8531	7.83434	7.96769	8.07505	+	+	4	4	4	9.8	9.8	9.8	21.862	34.978	220600000000	5107900000	215490000000	4.49915	5.91044	4.11629	7.95903	A8MT72;Q2NKQ5;Q16799-3;Q16799-2;Q16799	A8MT72;Q2NKQ5;Q16799-3;Q16799-2;Q16799	Reticulon;Reticulon-1	RTN1
5.51721	6.00863	6.51775	7.96849	7.84869	7.65499	+	+	13	1	1	48.7	6.4	6.4	25.609	64.557	5844200000	81374000	5762800000	2.63857	6.01453	3.86569	7.82406	O95197-3;O95197-5;O95197-6;B7Z4M1	O95197-3	Reticulon-3	RTN3
5.85539	5.75371	6.29589	7.22081	7.3497	7.46254	+	+	15	15	3	24.7	24.7	3.8	129.93	323.31	56682000000	1876500000	54806000000	3.10997	5.96833	4.04385	7.34435	Q9NQC3;Q9NQC3-4;Q9NQC3-6	Q9NQC3;Q9NQC3-4;Q9NQC3-6	Reticulon-4	RTN4
5.03342	6.18045	5.59652	4.11478	5.69385	5.51973	+		8	8	8	58.9	58.9	58.9	19.325	185.27	2180500000	59474000	2121100000	2.45917	5.60346	2.02522	5.10945	J3KQ48;Q9Y3E5	J3KQ48;Q9Y3E5	Peptidyl-tRNA hydrolase 2, mitochondrial	PTRH2
5.62723	5.68024	5.60033	4.43015	4.69109	4.81875	+	+	28	28	28	75.4	75.4	75.4	56.559	323.31	109660000000	4384600000	105280000000	4.76072	5.63593	3.21816	4.64666	P06576;H0YH81;F8W079;F8W0P7;H0YI37	P06576;H0YH81;F8W079	ATP synthase subunit beta, mitochondrial;ATP synthase subunit beta	ATP5B
2.56901	3.45194	2.8536	4.65992	4.59288	4.57525		+	8	8	5	47.7	47.7	32.9	23.482	74.8	1027400000	147060000	880310000	2.11647	2.95818	4.50428	4.60935	P51148;P51148-2;K7ERI8;K7ERQ8;F8VVK3;K7ENY4;F8VWU4;F8VVZ0;K7EIP6;F8WCY6;F8WD79;F8VPW9;F8VSF8;F8VWZ7	P51148;P51148-2;K7ERI8;K7ERQ8;F8VVK3;K7ENY4	Ras-related protein Rab-5C	RAB5C
3.16034	2.68192	3.28986	5.09761	5.49394	2.62576	+		9	9	9	23.7	23.7	23.7	49.436	18.373	538440000	88676000	449770000	2.43551	3.04404	1.40819	4.40577	Q3LIE7;Q15392-2;Q15392;H7C4B7	Q3LIE7;Q15392-2;Q15392;H7C4B7	Delta(24)-sterol reductase	Nbla03646;DHCR24
3.92552	3.20945	3.58568	3.9982	4.83036	3.48478	+		24	24	24	32.4	32.4	32.4	122.85	133.23	797380000	62213000	735160000	2.47727	3.57355	2.04572	4.10444	Q9BSJ8;Q9BSJ8-2;F8VZB1	Q9BSJ8;Q9BSJ8-2	Extended synaptotagmin-1	ESYT1
3.88039	4.02396	3.92533	3.90371	3.834	4.14094	+	+	11	11	3	50.5	50.5	11.6	33.331	147.33	4014400000	380900000	3633500000	3.93703	3.94323	3.25962	3.95955	Q9Y6C9	Q9Y6C9	Mitochondrial carrier homolog 2	MTCH2
1.14945	1.22731	1.12155	3.91753	NaN	3.88039	+	+	5	5	5	29.1	29.1	29.1	23.294	26.51	908580000	370790000	537790000	3.13332	1.1661	2.51831	3.89896	A0A0C4DGH2;P62070;P62070-4;E9PK85;P62070-3;P62070-2;P10301;E9PQK5;E9PQC5;E9PQ87	A0A0C4DGH2;P62070;P62070-4;E9PK85;P62070-3;P62070-2	Ras-related protein R-Ras2	RRAS2
5.61241	5.46473	5.284	3.38239	4.27128	4.03817	+	+	14	14	14	56.2	56.2	56.2	28.908	323.31	15416000000	594390000	14822000000	3.51845	5.45371	2.33448	3.89728	P24539;Q5QNZ2	P24539;Q5QNZ2	ATP synthase F(0) complex subunit B1, mitochondrial	ATP5F1
3.06535	3.35713	2.94066	3.6368	3.43309	4.23573	+	+	6	6	6	20.1	20.1	20.1	41.385	21.337	459220000	74565000	384650000	2.80692	3.12104	2.39139	3.76854	Q9Y679-3;Q9Y679-2;Q9Y679	Q9Y679-3;Q9Y679-2;Q9Y679	Ancient ubiquitous protein 1	AUP1
4.15939	4.27143	4.29124	2.81521	4.44208	3.93678	+		11	11	11	52.1	52.1	52.1	30.348	228.91	6808900000	613320000	6195600000	4.02835	4.24068	1.79057	3.73136	A0A0A0MR02;P45880-2;P45880;P45880-1;Q5JSD2;Q5JSD1;A2A3S1	A0A0A0MR02;P45880-2;P45880;P45880-1;Q5JSD2;Q5JSD1	Voltage-dependent anion-selective channel protein 2	VDAC2
4.03378	4.10769	4.25882	3.97554	3.84248	2.85724	+		5	5	5	12.2	12.2	12.2	56.598	33.906	524380000	28139000	496250000	3.59071	4.13343	2.01408	3.55842	Q15758;M0QXM4;Q15758-3;Q15758-2;M0QX44	Q15758;M0QXM4;Q15758-3;Q15758-2	Neutral amino acid transporter B(0);Amino acid transporter	SLC1A5
5.11607	5.10509	5.07318	3.42264	3.55397	3.50182	+	+	38	38	38	69.4	69.4	69.4	59.75	323.31	114740000000	6003400000	108730000000	5.19601	5.09811	3.92274	3.49281	P25705;P25705-2;P25705-3;K7EK77;K7ERX7;K7ENJ4;K7EJP1;K7EQH4;K7ESA0	P25705;P25705-2;P25705-3	ATP synthase subunit alpha, mitochondrial	ATP5A1
1.14117	1.30685	1.05679	3.92125	3.49249	2.86457	+		9	9	8	46.9	46.9	41.1	21.45	28.563	1136000000	451680000	684300000	2.40573	1.16827	2.10097	3.4261	P63000;P63000-2;P60763;P15153;J3KSC4;J3QLK0;B1AH77;B1AH78;B1AH80;F8WET9;B1AH79;G3V4H1;G3V476;A0A0C4DH03;Q9H4E5-2;P17081;Q9H4E5	P63000;P63000-2;P60763;P15153	Ras-related C3 botulinum toxin substrate 1;Ras-related C3 botulinum toxin substrate 3;Ras-related C3 botulinum toxin substrate 2	RAC1;RAC3;RAC2
3.35417	3.00135	3.3113	2.95258	3.76564	2.89097	+		7	7	6	31.3	31.3	26.7	21.671	23.397	987530000	162000000	825530000	2.92526	3.22227	2.1161	3.20306	O00264;O00264-2	O00264;O00264-2	Membrane-associated progesterone receptor component 1	PGRMC1
3.2301	2.14545	3.20852	3.02675	3.14174	3.26784		+	23	23	12	29.3	29.3	15	109.55	115.8	2424300000	512880000	1911400000	1.81542	2.86135	3.3102	3.14544	P05023-3;P05023-4;P05023;P05023-2;M0R116;A0A0A0MT26;P13637;P13637-2;P13637-3;H0Y7C1;Q13733;Q5TC01;P20648;Q5TC02;M0QXF2;E9PRA5	P05023-3;P05023-4;P05023;P05023-2	Sodium/potassium-transporting ATPase subunit alpha-1	ATP1A1
3.85519	3.6792	3.77273	2.40455	3.12335	3.21663	+		18	18	18	47.3	47.3	47.3	47.079	148.63	5933800000	621970000	5311900000	3.74019	3.76904	2.11585	2.91484	P22234;E9PBS1;P22234-2;D6RF62	P22234;E9PBS1;P22234-2;D6RF62	Multifunctional protein ADE2;Phosphoribosylaminoimidazole-succinocarboxamide synthase;Phosphoribosylaminoimidazole carboxylase	PAICS
2.85589	2.76634	2.43994	2.81816	2.57536	3.1516	+	+	5	5	5	25.1	25.1	25.1	24.593	30.71	625670000	136990000	488680000	2.65663	2.68739	2.46584	2.84837	O75396;A0A087X1A9	O75396	Vesicle-trafficking protein SEC22b	SEC22B
3.79129	3.52406	3.81486	2.85322	3.05276	2.62908	+	+	10	10	10	55.3	55.3	55.3	33.786	40.353	385480000	32742000	352740000	3.19986	3.71007	2.73398	2.84502	A0A0C4DGQ5;P04632;K7ELJ7;K7EM73;K7EIV0;A0A075B7C0;K7EKD8;U3KQE2;U3KPR7;K7ES78;K7EMQ1;Q96L46	A0A0C4DGQ5;P04632;K7ELJ7;K7EM73;K7EIV0;A0A075B7C0;K7EKD8;U3KQE2	Calpain small subunit 1	CAPNS1
3.24911	3.681	2.66848	2.91682	2.84	2.74132		+	14	14	14	42.1	42.1	42.1	52.645	51.003	1095700000	83670000	1012000000	2.08087	3.19953	3.49298	2.83271	P31930	P31930	Cytochrome b-c1 complex subunit 1, mitochondrial	UQCRC1
3.15301	3.19857	3.47897	2.57022	3.04951	2.87784	+	+	4	4	4	27.2	27.2	27.2	17.033	7.8848	509040000	65917000	443120000	3.01509	3.27685	2.61243	2.83252	B4E1G1;Q9BUN8-2;Q9BUN8;E5RGY0	B4E1G1;Q9BUN8-2;Q9BUN8;E5RGY0	Derlin-1	DERL1
2.59994	2.7006	2.62448	3.01151	2.64196	NaN	+		8	8	8	24	24	24	43.159	79.723	1524700000	309070000	1215700000	3.88088	2.64167	1.38138	2.82674	Q9P035;H3BS72;H3BPZ1;Q9P035-2;H3BRL8;H3BMZ1	Q9P035;H3BS72;H3BPZ1;Q9P035-2	Very-long-chain (3R)-3-hydroxyacyl-CoA dehydratase 3	HACD3
2.61351	3.14828	3.02684	2.54169	2.90475	2.84354	+	+	12	12	12	34.4	34.4	34.4	48.799	106.85	1650000000	236160000	1413900000	2.51731	2.92954	2.7838	2.76333	A0A0C4DGS1;P39656;P39656-3;P39656-2;U3KQ84	A0A0C4DGS1;P39656;P39656-3;P39656-2;U3KQ84	Dolichyl-diphosphooligosaccharide--protein glycosyltransferase 48 kDa subunit	DDOST
3.03383	3.37086	2.9159	2.66177	2.49733	3.10514	+	+	5	5	5	66.2	66.2	66.2	15.521	48.731	436920000	56187000	380740000	2.71679	3.10686	2.36516	2.75475	Q9NS69	Q9NS69	Mitochondrial import receptor subunit TOM22 homolog	TOMM22
3.65855	3.49172	3.43162	2.73572	2.718	NaN	+	+	11	11	11	29.3	29.3	29.3	50.854	100.91	2550200000	550730000	1999500000	3.43162	3.5273	2.68442	2.72686	Q9NS86	Q9NS86	LanC-like protein 2	LANCL2
1.95412	1.99186	2.93846	2.99785	2.26511	2.86833			8	8	8	49	49	49	22.977	21.064	211550000	95313000	116240000	1.71837	2.29481	2.1632	2.71043	Q9NP72;Q9NP72-2;A0A087X163;Q5W0J0;H0Y6T8;Q9NP72-3	Q9NP72;Q9NP72-2;A0A087X163;Q5W0J0;H0Y6T8;Q9NP72-3	Ras-related protein Rab-18	RAB18
5.30801	5.2958	3.88714	2.89416	2.73233	2.32288		+	5	5	5	32.7	32.7	32.7	25.127	49.405	1668800000	65054000	1603800000	2.02695	4.83031	2.3882	2.64979	Q99720;Q99720-3;Q99720-4;Q99720-5;Q99720-2;Q5T1J1	Q99720;Q99720-3;Q99720-4;Q99720-5;Q99720-2	Sigma non-opioid intracellular receptor 1	SIGMAR1
2.3907	2.35806	2.168	2.47303	2.9201	2.54957	+	+	14	14	13	58.6	58.6	58.6	27.893	110.62	10572000000	3142600000	7429500000	3.043	2.30558	2.56741	2.64757	Q9P0L0;Q9P0L0-2;J3QKM9	Q9P0L0;Q9P0L0-2	Vesicle-associated membrane protein-associated protein A	VAPA
3.55692	3.99521	3.59371	2.55483	2.72805	2.60713	+	+	17	17	17	31.6	31.6	31.6	64.872	133.21	2210300000	265690000	1944600000	2.84638	3.71528	3.42001	2.63	F5GZS6;J3KPF3;P08195-2;P08195-3;P08195;P08195-4;F5H0E2;H0YFS2;F5GZI0;H0YFX4;F5H867;F5GZR9	F5GZS6;J3KPF3;P08195-2;P08195-3;P08195;P08195-4	4F2 cell-surface antigen heavy chain	SLC3A2
1.97431	2.12869	2.24607	NaN	2.52807	2.62007	+		6	6	6	24.4	24.4	24.4	25.206	12.442	712180000	189250000	522930000	2.8602	2.11636	1.94403	2.57407	P62993;P62993-2;J3KT38;J3QLF6;J3QRL5	P62993;P62993-2	Growth factor receptor-bound protein 2	GRB2
2.41221	3.8482	2.46762	2.58065	2.50396	2.59531		+	7	7	6	9.4	9.4	8.4	80.529	10.568	499750000	62076000	437670000	1.60054	2.90934	3.91219	2.55997	P46977;P46977-2;A0A0C4DH80;E9PN73;E9PI32;H0YET6	P46977;P46977-2	Dolichyl-diphosphooligosaccharide--protein glycosyltransferase subunit STT3A	STT3A
2.92964	2.80791	3.16673	2.58866	2.41034	2.64672	+	+	20	20	20	42.8	42.8	42.8	68.569	169.63	4846400000	769320000	4077100000	2.90049	2.96809	3.10914	2.54857	P04843;B7Z4L4;F8WF32	P04843;B7Z4L4	Dolichyl-diphosphooligosaccharide--protein glycosyltransferase subunit 1	RPN1
4.27008	4.38998	4.02919	2.50236	2.48223	2.59479	+	+	40	40	2	56.5	56.5	3.1	92.115	323.31	17806000000	1701000000	16105000000	3.20172	4.22975	3.7256	2.52646	Q92598-2;Q92598;Q92598-3;R4GN69	Q92598-2;Q92598;Q92598-3	Heat shock protein 105 kDa	HSPH1
1.88378	2.35733	2.47348	2.52017	2.47059	2.54834	+	+	80	80	80	43.9	43.9	43.9	273.42	323.31	13705000000	6250400000	7455100000	2.19176	2.23819	4.0874	2.51303	P49327;A0A0U1RQF0;A0A0U1RRG3;J3KTF0	P49327;A0A0U1RQF0	Fatty acid synthase;[Acyl-carrier-protein] S-acetyltransferase;[Acyl-carrier-protein] S-malonyltransferase;3-oxoacyl-[acyl-carrier-protein] synthase;3-oxoacyl-[acyl-carrier-protein] reductase;3-hydroxyacyl-[acyl-carrier-protein] dehydratase;Enoyl-[acyl-carrier-protein] reductase;Oleoyl-[acyl-carrier-protein] hydrolase	FASN
2.35991	NaN	2.06267	NaN	2.26457	2.56655			6	6	6	21.8	21.8	21.8	39.646	23.154	254560000	67262000	187300000	1.36934	2.21129	1.40075	2.41556	Q3ZCQ8;Q3ZCQ8-2;M0R0C3;M0R2F8;Q3ZCQ8-3;M0R003;M0QXC3;M0R2Z3;M0R303;M0R2D2;M0R047;M0R1Y4	Q3ZCQ8;Q3ZCQ8-2;M0R0C3;M0R2F8;Q3ZCQ8-3	Mitochondrial import inner membrane translocase subunit TIM50	TIMM50
2.81285	2.98101	2.83774	2.16582	2.55886	2.51306	+	+	9	9	2	46.6	46.6	5.8	32.642	26.644	1036000000	208500000	827510000	3.47948	2.8772	2.57923	2.41258	Q32Q12;P22392-2;J3KPD9;P22392;O60361;F6XY72	Q32Q12;P22392-2;J3KPD9;P22392	Nucleoside diphosphate kinase;Nucleoside diphosphate kinase B	NME1-NME2;NME2
2.45885	2.78758	2.39256	2.27551	2.18846	2.77201	+	+	10	10	10	50.9	50.9	50.9	29.702	71.22	1888500000	399570000	1489000000	2.63967	2.54633	2.24947	2.412	Q9Y5M8;H7C4H2;C9J5Z8	Q9Y5M8;H7C4H2	Signal recognition particle receptor subunit beta	SRPRB
2.90995	2.71556	2.78593	2.36205	2.47327	2.31924	+	+	19	19	15	75.4	75.4	60.3	22.11	219.5	100320000000	18409000000	81911000000	3.38674	2.80381	3.4315	2.38485	Q06830;A0A0A0MSI0;A0A0A0MRQ5	Q06830;A0A0A0MSI0	Peroxiredoxin-1	PRDX1
3.13248	2.7569	2.85669	2.54114	2.33016	2.16694	+	+	14	14	14	49.4	49.4	49.4	41.389	65.626	1297700000	256700000	1041000000	2.82944	2.91535	2.67269	2.34608	P28482;P28482-2;E9PJF0;E9PQW4;P27361-2;P27361-3;P27361;B3KR49;E9PBK7;H0YDH9;K7ELV1;K7EN18;P31152;Q16659	P28482;P28482-2	Mitogen-activated protein kinase 1	MAPK1
3.81424	3.64374	3.75403	2.40477	2.09007	NaN	+		6	6	6	23	23	23	35.716	81.501	544950000	59087000	485860000	3.74865	3.73734	1.35166	2.24742	P04818;P04818-2;P04818-3	P04818;P04818-2	Thymidylate synthase	TYMS
3.46937	3.42546	3.67548	2.0798	2.34701	2.31142	+	+	12	12	1	35	35	4	32.881	93.664	10923000000	1691200000	9231800000	3.32046	3.52343	2.85758	2.24608	P36542-2	P36542-2	ATP synthase subunit gamma, mitochondrial	ATP5C1
1.06095	0.951513	1.01949	2.07629	2.17105	2.25508	+	+	25	25	25	35.6	35.6	35.6	90.98	75.512	1331400000	524200000	807200000	3.00231	1.01065	3.24624	2.16747	P25205;P25205-2;J3KQ69;Q7Z6P5	P25205;P25205-2;J3KQ69	DNA replication licensing factor MCM3	MCM3
3.01012	3.08566	3.24182	2.09481	2.08277	2.27694	+	+	8	8	8	28.7	28.7	28.7	27.978	44.116	2723200000	428330000	2294900000	3.31866	3.11253	3.06993	2.15151	P57088;D6RAA6;H0Y8N0;J3KN43;D6RBY2	P57088;D6RAA6;H0Y8N0	Transmembrane protein 33	TMEM33
4.26888	4.0889	4.02989	2.01196	2.12271	2.06243	+	+	11	11	11	66.2	66.2	66.2	23.277	107.26	14459000000	1331300000	13127000000	3.51877	4.12923	3.61969	2.0657	P48047;H7C0C1;H7C086;H7C068	P48047;H7C0C1	ATP synthase subunit O, mitochondrial	ATP5O
1.87712	1.64975	1.54829	2.02662	1.90881	2.15902	+	+	16	16	16	17.2	17.2	17.2	126.27	28.413	363380000	109670000	253710000	2.48333	1.69172	2.89856	2.03148	Q93009-3;Q93009;H3BND8;F5H2X1	Q93009-3;Q93009;H3BND8	Ubiquitin carboxyl-terminal hydrolase 7;Ubiquitin carboxyl-terminal hydrolase	USP7
2.29128	2.66168	2.57737	2.15607	2.44903	1.42702	+		14	14	14	17.6	17.6	17.6	119.77	134.17	766050000	551360000	214700000	2.70155	2.51011	1.65595	2.01071	P53396-2;P53396;P53396-3;K7ESG8;K7EIE7	P53396-2;P53396;P53396-3	ATP-citrate synthase	ACLY
2.29593	2.74644	2.52201	1.90346	1.92018	1.95267	+	+	20	20	20	38.7	38.7	38.7	66.69	82.175	1243400000	228790000	1014600000	2.5768	2.52146	4.2496	1.92544	P17812;P17812-2;Q9NRF8	P17812;P17812-2	CTP synthase 1	CTPS1
4.90881	3.4939	4.75596	2.64948	1.83726	1.28842			14	14	14	83.2	83.2	83.2	18.491	65.892	6274400000	585650000	5688700000	1.98771	4.38622	1.40139	1.92505	O75947;O75947-2;F5H608	O75947;O75947-2	ATP synthase subunit d, mitochondrial	ATP5H
1.7566	1.63241	1.84687	1.9696	1.79863	1.97368	+	+	24	24	24	51.3	51.3	51.3	59.62	66.474	2770800000	925980000	1844800000	2.89742	1.74529	3.04237	1.91397	P50990;P50990-2;P50990-3;H7C4C8;H7C2U0	P50990;P50990-2;P50990-3;H7C4C8	T-complex protein 1 subunit theta	CCT8
3.37365	3.20477	3.07217	1.85455	1.94129	1.91739	+	+	40	35	21	77.1	71.5	42.8	70.108	323.31	39209000000	7229800000	31979000000	3.13393	3.21686	3.73415	1.90441	A0A0G2JIW1;P0DMV9;P0DMV8;P0DMV8-2;V9GZ37	A0A0G2JIW1;P0DMV9;P0DMV8;P0DMV8-2;V9GZ37	Heat shock 70 kDa protein 1B;Heat shock 70 kDa protein 1A	HSPA1B;HSPA1A
2.85282	2.90431	2.86592	1.79577	1.90454	1.89968	+	+	42	40	34	65.8	64.7	57.9	70.897	323.31	235110000000	42697000000	192420000000	4.5392	2.87435	3.44251	1.86666	P11142;E9PKE3;E9PNE6;P11142-2;A8K7Q2;E9PN89;E9PLF4;E9PQQ4;E9PQK7;E9PK54;E9PS65;P54652;E9PPY6;E9PM13;E9PN25;E9PI65	P11142;E9PKE3;E9PNE6;P11142-2;A8K7Q2;E9PN89	Heat shock cognate 71 kDa protein	HSPA8
2.06454	2.15014	2.26864	1.80405	1.88573	1.76333	+	+	5	5	5	21.8	21.8	21.8	25.838	16.69	610620000	198520000	412100000	3.12556	2.16111	3.40698	1.8177	P30048-2;P30048	P30048-2;P30048	Thioredoxin-dependent peroxide reductase, mitochondrial	PRDX3
1.46634	1.65764	1.65411	1.90958	1.724	1.80248	+	+	22	22	22	60.9	60.9	60.9	57.488	309.81	3982700000	1863200000	2119500000	2.80403	1.5927	3.05556	1.81202	P78371;P78371-2;F5GWF6;F8VQ14	P78371;P78371-2;F5GWF6;F8VQ14	T-complex protein 1 subunit beta	CCT2
1.70159	1.92323	1.73942	1.80806	1.85376	1.7726	+	+	9	9	9	17.2	17.2	17.2	85.605	40.892	409040000	127960000	281080000	2.83498	1.78808	3.77445	1.81147	Q13200-3;Q13200;Q13200-2;H7C1H2;H7C2Q3	Q13200-3;Q13200;Q13200-2	26S proteasome non-ATPase regulatory subunit 2	PSMD2
1.7796	2.01289	1.66676	1.6678	1.75997	1.72888	+	+	17	17	17	50.4	50.4	50.4	50.957	203.73	4836700000	1397000000	3439700000	2.50557	1.81975	3.60565	1.71888	H0Y4R1;P12268;E7ETK5	H0Y4R1;P12268	Inosine-5-monophosphate dehydrogenase 2	IMPDH2
1.25665	0.837297	1.24556	1.72426	1.79884	1.62593		+	13	13	13	31.5	31.5	31.5	58.024	100.03	1025100000	639330000	385720000	1.82341	1.11317	3.07056	1.71634	P40227;P40227-2;Q92526-3;Q92526	P40227;P40227-2	T-complex protein 1 subunit zeta	CCT6A
1.74485	1.64856	1.6241	1.65434	1.77876	1.71216	+	+	20	20	20	49.9	49.9	49.9	57.924	157.27	1836300000	700020000	1136300000	3.31403	1.6725	3.3576	1.71508	P50991;P50991-2	P50991;P50991-2	T-complex protein 1 subunit delta	CCT4
1.52662	1.34045	1.37479	1.75189	1.72901	1.65141	+	+	18	18	18	46.4	46.4	46.4	55.674	78.852	2838500000	1072200000	1766300000	2.78715	1.41395	3.50064	1.71077	B4DUR8;P49368;P49368-2;Q5SZX6;E9PRC8;E9PQ35;Q5SZX9;Q5SZW8	B4DUR8;P49368;P49368-2	T-complex protein 1 subunit gamma	CCT3
3.14791	3.31497	3.14379	1.57405	1.62569	1.7458	+	+	24	22	21	42	39.3	37.4	94.33	229.5	3782600000	608570000	3174000000	3.50874	3.20222	3.02181	1.64851	P34932;A0A087WYC1;A0A087WTS8;P34932-2	P34932;A0A087WYC1;A0A087WTS8	Heat shock 70 kDa protein 4	HSPA4
2.48841	2.51101	2.50909	1.53451	1.59646	1.5655	+	+	12	12	12	33.8	33.8	33.8	39.958	27.529	6104300000	1035900000	5068500000	5.07811	2.50284	3.88451	1.56549	Q00325-2;Q00325;F8VVM2;F8VWQ0;F8VZL5;F8VWR4	Q00325-2;Q00325;F8VVM2	Phosphate carrier protein, mitochondrial	SLC25A3
1.54057	1.28024	1.65791	1.70013	1.14711	1.82416	+		17	17	17	39.7	39.7	39.7	59.67	231.52	1764600000	1028500000	736160000	2.25637	1.49291	1.7595	1.55713	P48643;E7ENZ3;B7ZAR1;E9PCA1;P48643-2;D6RIZ7;H0Y914	P48643;E7ENZ3;B7ZAR1;E9PCA1;P48643-2	T-complex protein 1 subunit epsilon	CCT5
1.7657	1.50843	1.56487	1.64404	1.66721	1.3097	+	+	15	15	15	35.9	35.9	35.9	59.366	50.346	760990000	234980000	526010000	2.63181	1.613	2.25368	1.54032	Q99832;Q99832-3;Q99832-4;Q99832-2;F8WAM2;F8WBP8	Q99832;Q99832-3;Q99832-4;Q99832-2	T-complex protein 1 subunit eta	CCT7
1.02482	1.27041	1.21779	1.50848	1.54335	1.36093	+	+	11	11	9	28.4	28.4	23	34.899	48.362	2211000000	953110000	1257900000	2.39362	1.171	2.84115	1.47092	P43358;C9JZJ5;C9J9C2;C9JK50;C9JIR1;P43361;P43363;P43362	P43358	Melanoma-associated antigen 4	MAGEA4
2.19969	2.00515	1.3097	1.54414	1.33663	1.41733		+	15	15	15	16.6	16.6	16.6	148.09	50.544	139840000	42459000	97378000	1.67939	1.83818	2.75146	1.4327	E9PF10;O75694;O75694-2;D6RA13	E9PF10;O75694;O75694-2	Nuclear pore complex protein Nup155	NUP155
3.56815	3.59872	3.46897	1.37901	1.36205	1.39621	+	+	50	50	50	59.9	59.9	59.9	73.68	323.31	212090000000	27827000000	184270000000	3.91366	3.54528	4.29122	1.37909	P38646;D6RJI2;H0YBG6;D6RA73;H0Y8S0	P38646	Stress-70 protein, mitochondrial	HSPA9
1.71581	2.04869	1.95754	1.15885	1.62849	1.30644	+		9	8	8	40.4	34.8	34.8	21.892	18.317	670470000	206020000	464450000	2.56856	1.90735	1.99279	1.36459	P32119;A6NIW5;P32119-2	P32119;A6NIW5	Peroxiredoxin-2	PRDX2
1.24428	1.27911	1.71594	1.27929	1.60222	1.19478			5	5	2	43.2	43.2	16	18.483	20.374	385740000	158910000	226830000	1.94554	1.41311	2.0838	1.35876	E9PLD0;Q9H0U4;A0A087WTI1;Q92928;H0YLJ8;H0YL94;H0YMN7;H0YNE9;P61026;P51153;Q92930;P61006-2;P61006;P59190-2;P59190	E9PLD0;Q9H0U4;A0A087WTI1;Q92928	Ras-related protein Rab-1B;Putative Ras-related protein Rab-1C	RAB1B;RAB1C
1.28966	1.78881	1.54102	1.58434	1.18015	1.21182			13	13	13	33.6	33.6	33.6	50.118	52.369	2194800000	811930000	1382800000	2.06331	1.53983	2.02454	1.32544	P26641;P26641-2	P26641;P26641-2	Elongation factor 1-gamma	EEF1G
0.942383	1.06729	1.29007	1.35991	1.34857	1.22651		+	21	21	21	56.5	56.5	56.5	60.343	269.77	15169000000	10219000000	4950300000	2.07373	1.09992	2.9754	1.31167	P17987;E7EQR6;E7ERF2;F5H282;F5GZ03;F5GZI8;F5H136;F5GYL4;F5H726;F5H676;F5H7Y1	P17987;E7EQR6;E7ERF2;F5H282	T-complex protein 1 subunit alpha	TCP1
2.06157	2.22876	2.73229	1.06461	1.43087	1.33451	+		13	13	13	71.5	71.5	71.5	18.012	120.7	6644200000	4767700000	1876500000	2.13469	2.34087	2.13717	1.27666	P62937;F8WE65;C9J5S7;P62937-2;E5RIZ5;P0DN26;A0A0H2UH34;A0A0B4J2A2;A0A075B767;A0A075B759;Q9Y536;F5H284;P0DN37	P62937;F8WE65;C9J5S7;P62937-2	Peptidyl-prolyl cis-trans isomerase A;Peptidyl-prolyl cis-trans isomerase A, N-terminally processed;Peptidyl-prolyl cis-trans isomerase	PPIA
1.49667	1.27816	1.13803	1.25786	1.22484	1.3225	+	+	23	23	23	39.1	39.1	39.1	78.973	169.07	3711400000	1534700000	2176700000	2.1979	1.30429	3.29164	1.2684	B9A067;Q16891-2;Q16891-4;Q16891;Q16891-3;C9J406;H7C463;A0A087WYS0;D6RAW4	B9A067;Q16891-2;Q16891-4;Q16891;Q16891-3;C9J406;H7C463	MICOS complex subunit MIC60	IMMT
4.0045	4.02201	3.88479	1.12922	1.27983	1.25792	+	+	46	46	44	59.6	59.6	58.6	72.332	323.31	204690000000	19827000000	184860000000	3.92842	3.97044	2.83152	1.22232	P11021	P11021	78 kDa glucose-regulated protein	HSPA5
3.09036	3.3605	3.32754	1.12353	1.26219	1.22064	+	+	12	12	12	47.1	47.1	47.1	37.895	123.58	3646100000	586260000	3059800000	3.16701	3.25947	2.93331	1.20212	P13995;P13995-2;B9A062;B8ZZU9	P13995;P13995-2;B9A062;B8ZZU9	Bifunctional methylenetetrahydrofolate dehydrogenase/cyclohydrolase, mitochondrial;NAD-dependent methylenetetrahydrofolate dehydrogenase;Methenyltetrahydrofolate cyclohydrolase	MTHFD2
1.85368	2.01282	1.94845	0.895845	1.17938	1.41549	+		31	31	30	45.1	45.1	43.9	95.337	194.22	3701600000	1114400000	2587200000	3.24558	1.93832	1.78885	1.16357	P13639	P13639	Elongation factor 2	EEF2
1.79954	2.14649	2.03503	1.24336	1.44031	0.746829	+		3	3	3	37.5	37.5	37.5	9.9743	14.343	802610000	255830000	546780000	2.58156	1.99369	1.50797	1.1435	P60468;S4R3B5	P60468	Protein transport protein Sec61 subunit beta	SEC61B
1.52712	1.64002	1.63185	1.12486	1.22386	1.07169	+	+	20	10	8	57.2	35.7	30.9	49.857	156.73	2566100000	946390000	1619700000	3.28743	1.59966	2.81654	1.14014	Q9BUF5;K7ESM5;K7EL29;K7ESQ3;K7EQT3;K7EJ64;K7ERA8;K7EJZ4;K7EN98;K7EPE5;K7ES63	Q9BUF5;K7ESM5	Tubulin beta-6 chain	TUBB6
1.26261	1.22983	1.15801	1.1564	1.09599	1.00166	+	+	30	30	30	69.6	69.6	69.6	38.604	323.31	100770000000	42076000000	58694000000	3.19128	1.21682	2.76481	1.08468	P07355;P07355-2;H0YN42;H0YMD0;H0YMU9;A6NMY6;H0YKS4;H0YM50;H0YNP5;H0YN28;H0YL33;H0YMM1;H0YKZ7;H0YLV6;H0YMT9;H0YKX9;H0YNA0;H0YKL9;H0YMW4;H0YN52;H0YKV8;H0YMD9;H0YNB8;H0YKN4;H0YLE2	P07355;P07355-2;H0YN42;H0YMD0;H0YMU9;A6NMY6;H0YKS4;H0YM50;H0YNP5;H0YN28;H0YL33	Annexin A2;Annexin;Putative annexin A2-like protein	ANXA2;ANXA2P2
1.27059	1.20389	1.56301	1.21468	0.982656	0.991608	+	+	6	6	6	21	21	21	49.512	50.716	680870000	273350000	407520000	2.1773	1.34583	2.29593	1.06298	O14929;O14929-2;F8WEW1;F8W9G7	O14929;O14929-2	Histone acetyltransferase type B catalytic subunit	HAT1
2.48034	2.42798	2.3799	1.13133	0.995231	0.980903	+	+	12	12	12	78.5	78.5	78.5	26.923	123.04	1293300000	289550000	1003800000	3.84616	2.42941	2.67071	1.03582	Q99714;Q99714-2;Q5H928	Q99714;Q99714-2;Q5H928	3-hydroxyacyl-CoA dehydrogenase type-2	HSD17B10
NaN	NaN	2.49746	4.88611	4.4822	5.34759		+	8	8	8	44.6	44.6	44.6	20.987	31.21	312460000	42309000	270150000	0	2.49746	2.58714	4.9053	P62834;A0A075B6Q0;P61224-2;P61224-3;P61224;F5H004;F5GX62;E7ESV4;F5H7Y6;F5H4H0;F5GYH7;F5H077;F5GWU8;F5H491;F5H0B7;F5H500;F5H6R7;F5GYB5;A0A0J9YXB3;P61224-4;A6NIZ1;F5H823;B7ZB78;F5GZG1;F8WBC0;O95716	P62834;A0A075B6Q0;P61224-2;P61224-3;P61224;F5H004;F5GX62;E7ESV4;F5H7Y6	Ras-related protein Rap-1A;Ras-related protein Rap-1b	RAP1A;RAP1B
NaN	NaN	NaN	3.63413	5.0181	4.41488			10	10	10	18.1	18.1	18.1	71.988	21.8	45615000	3269000	42346000	0	NaN	2.07814	4.3557	Q13049;Q5JVY0	Q13049	E3 ubiquitin-protein ligase TRIM32	TRIM32
NaN	NaN	1.81562	4.08874	4.46761	3.59132		+	8	7	7	52.9	47.1	47.1	21.308	57.04	76026000	5097600	70928000	0	1.81562	2.40854	4.04922	P84095	P84095	Rho-related GTP-binding protein RhoG	RHOG
NaN	NaN	NaN	3.61706	4.40722	4.08534		+	2	2	2	8.2	8.2	8.2	27.989	5.8879	336890000	19173000	317720000	0	NaN	2.49293	4.03654	Q969M3;Q969M3-3;E5RGR9;E5RHH4;Q969M3-2	Q969M3;Q969M3-3;E5RGR9;E5RHH4;Q969M3-2	Protein YIPF5;Protein YIPF	YIPF5
NaN	NaN	NaN	3.12673	3.08146	4.7952			7	7	7	24.7	24.7	24.7	52.623	70.361	326490000	67418000	259080000	0	NaN	1.64155	3.66779	Q96CS3	Q96CS3	FAS-associated factor 2	FAF2
4.15389	NaN	NaN	3.25107	3.40885	3.87873		+	5	5	5	23	23	23	37.893	59.237	413000000	17646000	395350000	0	4.15389	2.54254	3.51288	O96008;O96008-2;K7EKG4;K7EJ57	O96008;O96008-2;K7EKG4;K7EJ57	Mitochondrial import receptor subunit TOM40 homolog	TOMM40
-0.0310171	0.0214797	0.00259443	3.10903	3.03677	3.03478		+	231	231	194	77.1	77.1	67.3	226.53	323.31	4073500000000	2458100000000	1615400000000	0.0486609	-0.00231433	4.19589	3.06019	P35579;P35579-2;Q5BKV1;B1AH99;REV__S4R3H4;REV__E7EQT4;REV__Q9UKV3-5;REV__Q9UKV3;A0A087X0T3;P12883;P13535;Q9UKX3;Q9Y623;P11055;A7E2Y1	P35579;P35579-2	Myosin-9	MYH9
NaN	2.73866	NaN	3.43229	3.2009	2.39012			14	14	14	24.7	24.7	24.7	79.994	33.389	130850000	14747000	116110000	0	2.73866	1.96432	3.00777	P17655;P17655-2	P17655;P17655-2	Calpain-2 catalytic subunit	CAPN2
NaN	NaN	NaN	3.19955	2.77419	2.91129		+	5	5	5	12.9	12.9	12.9	57.293	21.177	25673000	1795800	23877000	0	NaN	2.748	2.96167	Q01581;P54868-3;P54868-2;P54868	Q01581	Hydroxymethylglutaryl-CoA synthase, cytoplasmic	HMGCS1
NaN	NaN	NaN	NaN	2.56208	2.95673			6	6	2	25.1	25.1	7.7	38.59	21.962	192480000	36374000	156110000	0	NaN	1.3425	2.7594	A0A0G2JNY4;P10316;P01892;P01891;Q9GJ45;B0UXQ0;P30512;P30459;P30453;P16190;P16189;P10314;O19617;A2AEA2;A0A0G2JPD3;P30457;P30456;P30450;P18462;P10321;Q95604;Q31612;Q09160;P30499	A0A0G2JNY4;P10316;P01892;P01891;Q9GJ45;B0UXQ0;P30512;P30459;P30453;P16190;P16189;P10314;O19617;A2AEA2;A0A0G2JPD3;P30457;P30456;P30450;P18462;P10321;Q95604	HLA class I histocompatibility antigen, A-69 alpha chain;HLA class I histocompatibility antigen, A-2 alpha chain;HLA class I histocompatibility antigen, A-68 alpha chain;HLA class I histocompatibility antigen, A-29 alpha chain;HLA class I histocompatibility antigen, A-74 alpha chain;HLA class I histocompatibility antigen, A-34 alpha chain;HLA class I histocompatibility antigen, A-33 alpha chain;H…	HLA-A;HLA-C
0.795684	0.586116	0.629193	NaN	2.65086	2.69842		+	5	4	4	32.5	26.7	26.7	21.258	13.394	477620000	224900000	252720000	2.04747	0.670331	2.24717	2.67464	P60953;P60953-1;Q5JYX0	P60953;P60953-1	Cell division control protein 42 homolog	CDC42
NaN	NaN	2.46884	2.47612	2.41568	2.38769		+	11	11	11	4.9	4.9	4.9	274.37	24.857	57159000	11290000	45870000	0	2.46884	3.93695	2.4265	P11717	P11717	Cation-independent mannose-6-phosphate receptor	IGF2R
0.225892	0.211137	0.131326	2.36522	2.4598	2.44827		+	12	12	6	83.7	83.7	47.1	19.779	297.79	67327000000	40465000000	26862000000	1.63442	0.189452	3.82112	2.42443	O14950;J3QRS3;P19105	O14950;J3QRS3;P19105	Myosin regulatory light chain 12B;Myosin regulatory light chain 12A	MYL12B;MYL12A
0.245374	0.260508	0.132248	2.43667	2.30454	2.30778		+	11	11	8	82.1	82.1	62.3	16.961	172.9	57054000000	33854000000	23200000000	1.46419	0.21271	3.465	2.34966	P60660-2;F8W1R7;G8JLA2;G3V1V0;P60660;J3KND3;B7Z6Z4;F8VPF3;G3V1Y7;F8VZU9;F8W180;F8VXL3;H0YI43	P60660-2;F8W1R7;G8JLA2;G3V1V0;P60660;J3KND3;B7Z6Z4;F8VPF3;G3V1Y7	Myosin light polypeptide 6	MYL6
0.287591	0.252052	0.172487	2.35072	2.30141	2.19714		+	16	16	7	61.2	61.2	32.1	37.331	323.31	18311000000	10587000000	7724300000	1.70035	0.237377	3.40565	2.28309	P62879;E7EP32;C9JXA5;C9JIS1;C9JZN1;P62879-2;C9JD14;F5H8J8;F5H100;F5H0S8;E9PCP0;P16520-2;P16520	P62879;E7EP32;C9JXA5;C9JIS1;C9JZN1;P62879-2	Guanine nucleotide-binding protein G(I)/G(S)/G(T) subunit beta-2	GNB2
0.411101	0.532766	0.494979	2.22946	1.99429	2.60843	+		70	54	54	39.7	33.7	33.7	227.87	323.31	40035000000	22826000000	17208000000	2.25398	0.479615	2.21366	2.2774	Q7Z406;Q7Z406-6;Q7Z406-2;Q7Z406-4;Q7Z406-5;M0QY43;A0A0C4DFM8;A1L2Z2	Q7Z406;Q7Z406-6;Q7Z406-2;Q7Z406-4;Q7Z406-5;M0QY43	Myosin-14	MYH14
NaN	NaN	2.19267	2.24574	2.05141	2.37329		+	9	9	9	12.1	12.1	12.1	87.088	20.965	132760000	38233000	94530000	0	2.19267	2.75282	2.22348	P54886-2;P54886	P54886-2;P54886	Delta-1-pyrroline-5-carboxylate synthase;Glutamate 5-kinase;Gamma-glutamyl phosphate reductase	ALDH18A1
NaN	NaN	NaN	2.07416	2.21686	2.08896		+	3	3	3	9.2	9.2	9.2	71.319	68.081	52558000	48133000	4425800	0	NaN	3.34347	2.12666	O14744-2;O14744;G3V5L5;H0YJX6;G3V580;G3V2L6;G3V2X6;C9JSX3;O14744-4;O14744-3;O14744-5	O14744-2;O14744;G3V5L5;H0YJX6	Protein arginine N-methyltransferase 5;Protein arginine N-methyltransferase 5, N-terminally processed	PRMT5
0.299714	0.172103	0.032524	NaN	2.00252	2.24929			2	2	2	10.7	10.7	10.7	16.684	27.293	1373100000	809710000	563410000	0.792643	0.168114	1.43289	2.12591	P05976-2;P05976;P08590	P05976-2;P05976;P08590	Myosin light chain 1/3, skeletal muscle isoform;Myosin light chain 3	MYL1;MYL3
-0.118805	-0.0559362	-0.106576	2.19469	2.14127	2.03249		+	162	135	125	68.7	61.2	57.8	229	323.31	200170000000	123710000000	76460000000	1.40196	-0.0937724	3.2967	2.12281	P35580;P35580-3;P35580-5;P35580-2;P35580-4;E7ERA5;H0Y6I0;Q13439-3;Q13439-4;Q13439;Q13439-5	P35580;P35580-3;P35580-5;P35580-2;P35580-4	Myosin-10	MYH10
NaN	NaN	NaN	1.6305	2.63715	1.97574			5	5	5	11.4	11.4	11.4	74.267	19.091	24542000	12001000	12541000	0	NaN	1.70886	2.08113	Q12931-2;Q12931;I3L0K7;I3L239;I3L253;I3L2D5	Q12931-2;Q12931;I3L0K7	Heat shock protein 75 kDa, mitochondrial	TRAP1
0.43328	0.364797	0.373286	NaN	2.06181	2.01117	+		15	9	8	64.1	42.9	33.8	37.377	212.73	4452600000	2353100000	2099500000	2.51812	0.390454	2.10158	2.03649	P62873;P62873-2;F6UT28;B1AKQ8;F6X3N5;B3KVK2	P62873;P62873-2;F6UT28;B1AKQ8;F6X3N5	Guanine nucleotide-binding protein G(I)/G(S)/G(T) subunit beta-1	GNB1
0.645702	2.66453	NaN	2.69234	1.49288	1.90712			11	11	9	13.7	13.7	10.4	109.73	34.993	479960000	214420000	265550000	0.457618	1.65512	1.54193	2.03078	P16615-5;P16615-2;P16615-3;P16615;P16615-4;H7C5W9;O14983-3;O14983-2;O14983;A0A0C4DH86;H3BTW4	P16615-5;P16615-2;P16615-3;P16615;P16615-4;H7C5W9	Sarcoplasmic/endoplasmic reticulum calcium ATPase 2	ATP2A2
0.661841	1.00863	0.860526	1.94366	1.85707	2.07765		+	12	9	8	48.6	37.6	34.7	27.764	94.089	1933600000	869560000	1064100000	1.85744	0.843666	2.97035	1.95946	P27348;E9PG15	P27348;E9PG15	14-3-3 protein theta	YWHAQ
0.248171	0.420725	0.29537	1.83172	1.79269	2.21288		+	15	10	10	45.8	30.8	30.8	40.532	175.32	5439400000	3115700000	2323700000	1.60709	0.321422	2.32683	1.94576	P08754	P08754	Guanine nucleotide-binding protein G(k) subunit alpha	GNAI3
NaN	NaN	NaN	1.94182	1.97893	1.82085		+	7	7	7	12.2	12.2	12.2	77.328	9.8106	15739000	4149600	11589000	0	NaN	3.20674	1.91387	P21980;P21980-2;A2A2A0;A2A299;P21980-3	P21980	Protein-glutamine gamma-glutamyltransferase 2	TGM2
0.983313	1.14926	0.804054	2.19563	1.81369	1.62045			8	8	8	63.5	63.5	63.5	17.965	75.499	22265000000	9343100000	12922000000	1.99096	0.978875	2.09624	1.87659	P62979;J3QS39;J3QTR3;F5H6Q2;F5GYU3;F5H2Z3;F5H265;B4DV12;F5H388;F5H747;F5GXK7;J3QKN0;Q5PY61;Q96C32;P62987;P0CG47;P0CG48;M0R1V7;J3QSA3;F5GZ39;M0R1M6;M0R2S1	P62979;J3QS39;J3QTR3;F5H6Q2;F5GYU3;F5H2Z3;F5H265;B4DV12;F5H388;F5H747;F5GXK7;J3QKN0;Q5PY61;Q96C32;P62987;P0CG47;P0CG48;M0R1V7	Ubiquitin-40S ribosomal protein S27a;Ubiquitin;40S ribosomal protein S27a;Ubiquitin-60S ribosomal protein L40;Ubiquitin;60S ribosomal protein L40;Polyubiquitin-B;Ubiquitin;Polyubiquitin-C;Ubiquitin	RPS27A;UBB;UBC;UBA52
NaN	NaN	NaN	1.6132	1.52602	2.37457			8	8	8	4.7	4.7	4.7	250.53	15.425	16082000	4479900	11602000	0	NaN	1.68129	1.83793	Q6UVK1	Q6UVK1	Chondroitin sulfate proteoglycan 4	CSPG4
NaN	NaN	1.25393	1.87354	1.79485	1.61814		+	11	11	11	32.5	32.5	32.5	46.971	36.93	272220000	94788000	177430000	0	1.25393	2.73724	1.76218	Q9BS26	Q9BS26	Endoplasmic reticulum resident protein 44	ERP44
0.245982	1.26496	0.678793	1.87539	1.43611	1.88237			39	39	23	70.3	70.3	47.9	83.263	323.31	19121000000	11430000000	7691200000	0.879433	0.729911	2.14325	1.73129	P08238;Q58FF7	P08238	Heat shock protein HSP 90-beta	HSP90AB1
NaN	NaN	3.3225	1.73144	1.72509	1.70593		+	7	7	7	18.5	18.5	18.5	65.928	46.666	59352000	21105000	38247000	0	3.3225	4.70226	1.72082	P49915-2;P49915	P49915-2;P49915	GMP synthase [glutamine-hydrolyzing]	GMPS
NaN	NaN	NaN	1.73933	1.65086	1.68984		+	13	13	13	27.8	27.8	27.8	68.996	40.871	123740000	49400000	74342000	0	NaN	3.64115	1.69334	P10515;E9PEJ4;H0YDD4	P10515;E9PEJ4;H0YDD4	Dihydrolipoyllysine-residue acetyltransferase component of pyruvate dehydrogenase complex, mitochondrial;Acetyltransferase component of pyruvate dehydrogenase complex	DLAT
NaN	3.5493	2.83145	1.49078	1.96129	1.58337			8	1	1	57.2	9.2	9.2	17.149	9.0712	138980000	26585000	112390000	1.14678	3.19038	2.13841	1.67848	P15531;P15531-2;E7ERL0;E5RHP0;C9K028	P15531;P15531-2;E7ERL0;E5RHP0	Nucleoside diphosphate kinase A	NME1
NaN	NaN	2.09038	1.31121	1.53331	2.13895			6	6	6	20.8	20.8	20.8	49.973	25.327	111050000	34827000	76222000	0	2.09038	1.66836	1.66116	P13489;H0YCR7;E9PMJ3;E9PLZ3;E9PIM9;E9PMA9;E9PMN0;E9PIK5	P13489;H0YCR7	Ribonuclease inhibitor	RNH1
0.0364681	0.0941009	0.0721745	0.953973	1.95118	2.07721			39	39	0	78.2	78.2	0	32.876	323.31	132220000000	81271000000	50946000000	1.24741	0.0675812	1.36813	1.66079	P09493-3;P09493-9;Q6ZN40;P09493-8;P09493-7;H0YK20	P09493-3;P09493-9;Q6ZN40;P09493-8;P09493-7	Tropomyosin alpha-1 chain	TPM1
NaN	NaN	NaN	1.48042	1.69417	1.55046		+	5	5	5	11.7	11.7	11.7	72.911	30.369	20174000	8697000	11477000	0	NaN	2.79812	1.57501	O00116;B8ZZ81	O00116	Alkyldihydroxyacetonephosphate synthase, peroxisomal	AGPS
0.130008	0.201508	0.311038	1.55203	1.64685	1.41191		+	17	17	12	55.5	55.5	40.6	40.45	291.28	17015000000	10025000000	6989900000	1.25624	0.214185	2.70651	1.53693	P04899;P04899-4;P04899-6;P04899-3;P04899-5;P04899-2;P11488;P19087;A8MTJ3;P38405-3	P04899;P04899-4;P04899-6;P04899-3;P04899-5;P04899-2	Guanine nucleotide-binding protein G(i) subunit alpha-2	GNAI2
0.0939657	0.180657	0.117296	1.37061	1.66143	1.54409		+	35	27	0	76.2	62.5	0	29.032	323.31	44021000000	26525000000	17496000000	1.43029	0.13064	2.51532	1.52538	P06753-2;A0A087WWU8;Q5HYB6;P06753-5;Q5VU61;P06753-7	P06753-2;A0A087WWU8;Q5HYB6;P06753-5;Q5VU61		TPM3;DKFZp686J1372
0.830823	0.756255	0.796681	1.22027	1.83236	1.32723	+		12	12	12	36.1	36.1	36.1	52.253	98.053	1992600000	1006900000	985740000	3.13381	0.794586	1.78764	1.45995	Q13137;Q13137-3;Q13137-4;Q13137-5;Q13137-2;D6REB0;D6RJE7;D6RF70;I3L4E1;I3L493;D6RBI4;H0Y9G3	Q13137;Q13137-3;Q13137-4;Q13137-5;Q13137-2;D6REB0	Calcium-binding and coiled-coil domain-containing protein 2	CALCOCO2
0.145221	0.0824301	-0.192958	NaN	1.39605	1.44795			31	17	16	74.6	54.8	52	28.521	292.04	6919400000	4335500000	2583900000	0.0355013	0.0115642	1.93493	1.422	P67936;P67936-2;K7ENT6;K7ERG3;K7EMU5;K7EPB9;K7EPV9;Q2TAC2-2;Q2TAC2	P67936;P67936-2;K7ENT6	Tropomyosin alpha-4 chain	TPM4
0.245496	1.76532	2.87076	1.35879	1.72635	1.14489			12	1	1	16.3	1.7	1.7	71.027	8.3942	12095000000	1837400000	10257000000	0.780096	1.62719	1.84792	1.41001	P17066;P48741	P17066;P48741	Heat shock 70 kDa protein 6;Putative heat shock 70 kDa protein 7	HSPA6;HSPA7
NaN	NaN	NaN	1.30929	1.41511	1.50279		+	5	5	5	7.8	7.8	7.8	113.8	13.679	27715000	7258600	20456000	0	NaN	2.80345	1.40906	P22314-2;P22314;Q5JRR9;Q5JRS0;Q5JRR6	P22314-2;P22314	Ubiquitin-like modifier-activating enzyme 1	UBA1
0.851839	0.968201	1.02673	1.37223	1.35676	1.2756	+	+	43	43	43	24.7	24.7	24.7	236.02	172.14	3874800000	1643200000	2231600000	2.53447	0.948923	3.29797	1.33486	F8VPD4;P27708;H7C2E4;H7C3Z5;H7BZB3;P31327-2;P31327;P31327-3	F8VPD4;P27708	CAD protein;Glutamine-dependent carbamoyl-phosphate synthase;Aspartate carbamoyltransferase;Dihydroorotase	CAD
NaN	NaN	NaN	0.937269	1.40523	1.65168			9	9	9	13.9	13.9	13.9	106.87	51.467	108520000	77632000	30889000	0	NaN	1.62197	1.33139	Q14697;Q14697-2;F5H6X6;E9PKU7;E9PNH1	Q14697;Q14697-2;F5H6X6;E9PKU7	Neutral alpha-glucosidase AB	GANAB
NaN	NaN	0.560128	1.52932	1.18745	1.27226		+	5	5	5	6.9	6.9	6.9	101.11	7.5932	110730000	64525000	46201000	0	0.560128	2.22755	1.32968	P56192;P56192-2;H0YHV5;H0YIC2;H0YHL6;H0YI94;H0YI27;H0YIP0	P56192;P56192-2	Methionine--tRNA ligase, cytoplasmic	MARS
NaN	NaN	NaN	1.23921	1.31417	1.38874		+	6	6	6	19.8	19.8	19.8	38.521	7.1858	334920000	180180000	154730000	0	NaN	2.96767	1.31404	E7EUI8;P11413;P11413-2;E7EM57;P11413-3;E9PD92	E7EUI8;P11413;P11413-2;E7EM57;P11413-3;E9PD92	Glucose-6-phosphate 1-dehydrogenase	G6PD
0.31487	1.41381	1.37468	1.04607	1.30393	1.54117			6	6	4	9.3	9.3	6.1	84.109	16.215	236690000	99201000	137480000	0.988169	1.03445	1.9233	1.29706	G3V325;O75127;C9JJT5;C9JU26;P56134-4;P56134-2;C9JGL8	G3V325;O75127	Pentatricopeptide repeat-containing protein 1, mitochondrial	ATP5J2-PTCD1;PTCD1
NaN	NaN	NaN	NaN	1.18859	1.3225			2	2	2	16.3	16.3	16.3	15.676	19.718	146160000	97392000	48763000	0	NaN	1.46957	1.25555	F5H3C1;O43264-2;O43264	F5H3C1;O43264-2;O43264	Centromere/kinetochore protein zw10 homolog	ZW10
0.175812	0.217479	0.196607	1.27119	1.22719	1.24969	+	+	62	62	1	60.3	60.3	1	119.63	323.31	156770000000	90300000000	66472000000	2.42934	0.196633	3.98564	1.24935	O00159-3;F5H6E2;O00159	O00159-3;F5H6E2;O00159	Unconventional myosin-Ic	MYO1C
0.265797	0.286408	0.276913	1.30024	1.14555	1.25677	+	+	63	63	63	57.6	57.6	57.6	145.01	323.31	33898000000	18879000000	15018000000	3.33337	0.276373	2.85699	1.23419	A0A0A0MRM8;Q9UM54-5;Q9UM54-2;Q9UM54-6;E7EW20;Q9UM54-4;Q9UM54-1;Q9UM54;A0A0D9SGC1;Q5JVM0	A0A0A0MRM8;Q9UM54-5;Q9UM54-2;Q9UM54-6;E7EW20;Q9UM54-4;Q9UM54-1;Q9UM54;A0A0D9SGC1	Unconventional myosin-VI	MYO6
0.270947	0.104337	-0.221758	1.20477	1.21599	1.08529		+	6	6	6	79.2	79.2	79.2	8.0061	36.056	2602000000	1643500000	958510000	0.120685	0.0511755	2.89341	1.16868	Q9UBI6	Q9UBI6	Guanine nucleotide-binding protein G(I)/G(S)/G(O) subunit gamma-12	GNG12
0.0241777	-0.0252945	0.0492126	1.25048	1.22682	1.02645		+	52	52	48	29.1	29.1	27.6	241.41	313.26	9757600000	5784300000	3973200000	0.267492	0.0160319	2.43394	1.16791	H0Y7L2;Q96N67-4;Q96N67-3;Q96N67-5;Q96N67-2;Q96N67-6;Q96N67;A0A0C4DGY6;Q96N67-7;A0A0U1RQT6;A0A0U1RRC1;A0A0U1RQJ5;A2A369;A0A0U1RQG7;A0A0U1RR97	H0Y7L2;Q96N67-4;Q96N67-3;Q96N67-5;Q96N67-2;Q96N67-6;Q96N67	Dedicator of cytokinesis protein 7	DOCK7
0.775177	0.812621	0.769095	1.20802	1.22928	0.990955	+	+	40	40	40	37.1	37.1	37.1	157.9	211.19	5683900000	2759800000	2924100000	3.52298	0.785631	2.35549	1.14275	P42704;B8ZZ38;A0A0C4DG06;C9JCA9;H7C3W8;A0A0C4DG51;Q9NP80-3;Q9NP80-2;Q9NP80	P42704	Leucine-rich PPR motif-containing protein, mitochondrial	LRPPRC
0.640991	0.643394	0.877116	1.02169	1.02977	1.36205			14	14	14	25.4	25.4	25.4	86.578	34.286	285380000	171180000	114210000	1.93524	0.7205	2.01899	1.13784	P47897-2;P47897;B4DDN1;H7C0R3;C9J165;A0A0U1RQT0;A0A0U1RQX5;A0A0U1RQM8;A0A0U1RQU2;A0A0U1RRC8;F2Z2V6;A0A0U1RRI9;A0A0U1RQE9;A0A0U1RQQ5;A0A0U1RQX9;A0A0U1RQL2;A0A0U1RQC3;A0A0U1RQJ6;A0A0U1RR66	P47897-2;P47897;B4DDN1;H7C0R3	Glutamine--tRNA ligase	QARS
0.275484	0.31603	0.316609	1.14796	1.12446	1.11123	+	+	57	57	49	56	56	47.8	128.48	323.31	102400000000	55940000000	46462000000	2.69546	0.302708	4.04264	1.12788	E9PDF6;O43795;O43795-2;E7EQD9;H7C2Y7;C9JYW1;C9JUP5;A0A0U1RRI3	E9PDF6;O43795;O43795-2	Unconventional myosin-Ib	MYO1B
0.10742	0.125254	-0.0534339	1.07806	1.25187	1.00274		+	21	21	21	21	21	21	138.49	103.29	2606900000	1501100000	1105800000	0.394312	0.0597468	2.35847	1.11089	Q13045-2;Q13045;Q13045-3;J3KS54;J3QQQ2;J3QQU5;J3QLR6;J3KS39;K7EQZ7;K7EP37;K7EP27	Q13045-2;Q13045;Q13045-3	Protein flightless-1 homolog	FLII
0.0875986	0.158337	0.06226	1.05762	1.2233	1.00504		+	37	37	37	50.8	50.8	50.8	98.918	323.31	19768000000	11673000000	8094700000	1.15385	0.102732	2.44544	1.09532	P53814-5;P53814-6;A0A087WVP4;P53814;A0A087X1R1;P53814-2;A0A096LNK9;B5MCI0;H7C372;C9JQZ8;H7BZZ8;C9JV14;C9JYU8;C9JGQ0;C9JP19;C9JBH9	P53814-5;P53814-6;A0A087WVP4;P53814;A0A087X1R1	Smoothelin	SMTN
-0.00824688	0.140909	0.0788831	1.06502	1.08746	1.12221		+	34	34	34	59.1	59.1	59.1	53.248	323.31	160330000000	91256000000	69071000000	0.611431	0.0705152	3.63417	1.09156	Q9ULV4;Q9ULV4-2;Q9ULV4-3;B4E3S0;H0YHL7;F8W1H8;F8VUX3;F8VSA4;F8VRE9;F8VTT6;F8VVB7;F8VV53;J3QLV6;J3KSS5;Q6QEF8-4;Q6QEF8-3;Q6QEF8-2;Q6QEF8-5;Q6QEF8;H3BRY3;P31146	Q9ULV4;Q9ULV4-2;Q9ULV4-3;B4E3S0;H0YHL7	Coronin-1C;Coronin	CORO1C
0.289952	0.111566	0.158337	1.20452	0.93885	1.08977		+	21	21	21	23.5	23.5	23.5	124.2	86.207	2846500000	1612900000	1233700000	1.13651	0.186618	2.29614	1.07771	Q9NQW6;Q9NQW6-2;H7C1K5;H7C0Y6;H7C167;C9JJT6;H7C3S1	Q9NQW6;Q9NQW6-2	Actin-binding protein anillin	ANLN
0.798921	0.911883	0.649753	1.08474	1.00375	1.08114		+	12	12	9	57.1	57.1	46.1	27.745	160.16	3737900000	1782400000	1955500000	2.03719	0.786853	3.20436	1.05654	P63104;E7EX29;E7ESK7;B0AZS6;P63104-2;E5RIR4;E9PD24;E7EVZ2;B7Z2E6;H0YB80;E5RGE1	P63104;E7EX29;E7ESK7;B0AZS6;P63104-2	14-3-3 protein zeta/delta	YWHAZ
NaN	NaN	NaN	1.36508	0.788435	0.991753			5	5	5	4.3	4.3	4.3	131.76	9.4959	67251000	29316000	37935000	0	NaN	1.60255	1.04842	J3KR24;A0A0A0MSX9;P41252;Q5TCD1	J3KR24;A0A0A0MSX9;P41252	Isoleucine--tRNA ligase, cytoplasmic	IARS
0.321582	0.309525	0.364572	1.09106	1.25278	0.687956	+		42	42	42	47.4	47.4	47.4	116.2	228.06	9555400000	5060500000	4495000000	2.59789	0.331893	1.5764	1.0106	O94832;K7EIG7;J3QRN6;J3KRL0;J3QRR2	O94832;K7EIG7;J3QRN6	Unconventional myosin-Id	MYO1D
5.95191	6.12336	5.76877	NaN	NaN	NaN	+		7	7	4	60	60	24.3	8.577	11.204	2068700000	64704000	2003900000	3.52851	5.94801	0	NaN	F5GZY7;Q9H0R8;Q9H0R8-2;F5GX12;F5H007;G3V1T7	F5GZY7;Q9H0R8;Q9H0R8-2	Gamma-aminobutyric acid receptor-associated protein-like 1	GABARAPL1
6.03212	5.75849	5.60469	NaN	NaN	NaN	+		1	1	1	4.4	4.4	4.4	24.817	8.2477	690090000	8939700	681150000	3.33314	5.79844	0	NaN	P00846	P00846	ATP synthase subunit a	MT-ATP6
4.49102	5.80098	5.65715	NaN	NaN	NaN	+		1	1	1	0.3	0.3	0.3	288.89	1.7762	5146000000	253240000	4892700000	2.21957	5.31638	0	NaN	P42345	P42345	Serine/threonine-protein kinase mTOR	MTOR
3.66414	4.23527	5.95531	NaN	NaN	NaN			2	2	2	23	23	23	8.0866	23.099	908520000	32554000	875960000	1.66726	4.61824	0	NaN	H7BYV1;E9PS44;E9PQN9;P13164;Q01629;Q01628	H7BYV1;E9PS44;E9PQN9;P13164;Q01629;Q01628	Interferon-induced transmembrane protein 1;Interferon-induced transmembrane protein 2;Interferon-induced transmembrane protein 3	IFITM2;IFITM3;IFITM1
2.45586	4.84995	5.2857	NaN	NaN	NaN			5	5	5	18.7	18.7	18.7	30.658	56.742	1090300000	38644000	1051700000	1.38477	4.19717	0	NaN	Q9Y277;Q9Y277-2;E5RFP6;E5RJN6;E5RHZ6;E5RK27;E5RHE1;E5RFL1	Q9Y277;Q9Y277-2;E5RFP6;E5RJN6;E5RHZ6;E5RK27	Voltage-dependent anion-selective channel protein 3	VDAC3
3.77621	4.0009	3.80478	NaN	NaN	NaN	+		3	3	3	18.1	18.1	18.1	16.829	8.8839	269200000	47126000	222070000	3.47569	3.86063	0	NaN	Q9NRP0;Q9NRP0-2;A0A087WUD3	Q9NRP0;Q9NRP0-2	Oligosaccharyltransferase complex subunit OSTC	OSTC
4.0072	2.78829	4.06738	NaN	NaN	NaN			43	43	43	35.1	35.1	35.1	153.89	323.31	5712700000	361510000	5351200000	1.88653	3.62095	0	NaN	Q92878;Q92878-2;Q92878-3;E7EN38;E7ESD9;C9JNH8;E9PM98;H7C0P8;H7C0V2	Q92878;Q92878-2;Q92878-3;E7EN38	DNA repair protein RAD50	RAD50
3.59096	3.88029	3.26134	NaN	NaN	NaN	+		6	6	6	18.1	18.1	18.1	50.151	38.815	260770000	31024000	229750000	2.60404	3.57753	0	NaN	P36551;H0YA22;P36551-2	P36551	Oxygen-dependent coproporphyrinogen-III oxidase, mitochondrial	CPOX
4.41041	3.15006	3.16771	NaN	NaN	NaN			11	11	10	21.9	21.9	20.9	80.76	79.915	582130000	87837000	494290000	1.87487	3.57606	0	NaN	O43815-2;O43815	O43815-2;O43815	Striatin	STRN
3.69265	2.37134	4.04221	NaN	NaN	NaN			6	6	6	35.2	35.2	35.2	24.976	15.021	286690000	92315000	194370000	1.65639	3.36873	0	NaN	P49755;G3V2K7	P49755;G3V2K7	Transmembrane emp24 domain-containing protein 10	TMED10
3.09204	4.05806	2.89714	NaN	NaN	NaN			7	7	7	23.3	23.3	23.3	30.772	15.791	657760000	121170000	536600000	1.94725	3.34908	0	NaN	P21796;C9JI87	P21796;C9JI87	Voltage-dependent anion-selective channel protein 1	VDAC1
3.36583	NaN	3.25355	NaN	NaN	NaN			7	7	7	14.5	14.5	14.5	74.667	11.084	110610000	13007000	97606000	1.96667	3.30969	0	NaN	Q15067-2;Q15067;Q15067-3;K7ENF1;K7ESC7;I3L2U4;K7ELT1;I3L0T4	Q15067-2;Q15067;Q15067-3	Peroxisomal acyl-coenzyme A oxidase 1	ACOX1
NaN	3.30046	3.2709	NaN	NaN	NaN	+		4	4	4	11	11	11	51.199	10.376	229690000	24225000	205460000	2.5431	3.28568	0	NaN	Q9UL15;Q9UL15-2	Q9UL15;Q9UL15-2	BAG family molecular chaperone regulator 5	BAG5
3.32294	NaN	3.06948	NaN	NaN	NaN			3	3	3	18.2	18.2	18.2	21.943	17.606	188380000	45411000	142960000	1.5981	3.19621	0	NaN	O14925;Q5SRD1;B4DDK6	O14925;Q5SRD1	Mitochondrial import inner membrane translocase subunit Tim23;Putative mitochondrial import inner membrane translocase subunit Tim23B	TIMM23;TIMM23B
NaN	3.06733	3.30403	NaN	NaN	NaN			3	3	3	24.2	24.2	24.2	18.566	25.191	103000000	12360000	90640000	1.62635	3.18568	0	NaN	P60604;P60604-2;F8WCB9;F8WDB1	P60604;P60604-2	Ubiquitin-conjugating enzyme E2 G2	UBE2G2
3.07075	NaN	3.22934	NaN	NaN	NaN			5	5	5	22	22	22	25.565	6.7711	73842000	11422000	62421000	1.79528	3.15005	0	NaN	P00403	P00403	Cytochrome c oxidase subunit 2	MT-CO2
3.33942	NaN	2.91814	NaN	NaN	NaN			3	3	3	44.8	44.8	44.8	6.4575	10.019	125310000	23479000	101830000	1.3686	3.12878	0	NaN	Q96IX5	Q96IX5	Up-regulated during skeletal muscle growth protein 5	USMG5
2.71207	3.46767	3.0963	NaN	NaN	NaN	+		3	3	3	7.8	7.8	7.8	53.944	10.507	755730000	129620000	626110000	2.30626	3.09201	0	NaN	P53985;Q5T8R3;Q5T8R5;P53985-2;Q5T8R4	P53985;Q5T8R3;Q5T8R5;P53985-2	Monocarboxylate transporter 1	SLC16A1
3.17031	3.01209	NaN	NaN	NaN	NaN			4	4	4	7.3	7.3	7.3	52.949	9.4196	556670000	99518000	457160000	1.7881	3.0912	0	NaN	B4DR61;P61619;H7C1Q9;C9JXC6;H7C069;A6NK38;F2Z2C7;A6NIF9;C9JJV4;F8W776;Q8TC24;P61619-3;Q9H9S3-2;Q9H9S3-3;Q9H9S3	B4DR61;P61619;H7C1Q9;C9JXC6;H7C069;A6NK38;F2Z2C7;A6NIF9;C9JJV4;F8W776;Q8TC24;P61619-3;Q9H9S3-2;Q9H9S3-3;Q9H9S3	Protein transport protein Sec61 subunit alpha isoform 1;Protein transport protein Sec61 subunit alpha isoform 2	SEC61A1;SEC61A2
3.22922	3.08345	2.78132	NaN	NaN	NaN	+		4	4	4	52.6	52.6	52.6	8.4518	14.401	213230000	42142000	171090000	2.72402	3.03133	0	NaN	E9PN17;O75964	E9PN17;O75964	ATP synthase subunit g, mitochondrial	ATP5L
3.21909	3.04611	2.55181	NaN	NaN	NaN	+		5	5	5	22	22	22	23.881	6.4005	294130000	69049000	225080000	2.33764	2.939	0	NaN	Q8TED1;E7ETY7;J3KNB5	Q8TED1;E7ETY7	Probable glutathione peroxidase 8;Glutathione peroxidase	GPX8
3.08298	2.76384	2.69599	NaN	NaN	NaN	+		5	4	4	18.9	13	13	35.619	14.099	348730000	54285000	294440000	2.75678	2.8476	0	NaN	Q9H9B4;D6RFI0;D6RAE9;D6RDG7;S4R2X2	Q9H9B4;D6RFI0	Sideroflexin-1	SFXN1
NaN	2.65074	3.00459	NaN	NaN	NaN			4	4	4	14.1	14.1	14.1	34.324	8.7163	149150000	26883000	122260000	1.40033	2.82767	0	NaN	Q53GQ0;E9PI21;Q53GQ0-2	Q53GQ0;E9PI21;Q53GQ0-2	Very-long-chain 3-oxoacyl-CoA reductase	HSD17B12
3.20065	1.66853	3.53543	NaN	NaN	NaN			3	3	3	13.7	13.7	13.7	25.206	12.085	241290000	27104000	214180000	1.40234	2.80153	0	NaN	Q13445;K7EIN4;K7EQ63	Q13445;K7EIN4;K7EQ63	Transmembrane emp24 domain-containing protein 1	TMED1
2.54604	2.84258	2.91827	NaN	NaN	NaN	+		13	13	13	38.9	38.9	38.9	54.722	59.243	1788300000	307770000	1480500000	2.77511	2.76896	0	NaN	Q12834	Q12834	Cell division cycle protein 20 homolog	CDC20
2.65324	2.75399	2.64462	NaN	NaN	NaN	+		7	7	7	19.6	19.6	19.6	50.096	19.682	489500000	89309000	400190000	3.76685	2.68395	0	NaN	Q99615-2;Q99615;K7EPP7;K7ESP1;K7EIH8;K7EJE9;K7EK03;K7EJL5;K7EN19;K7EJV7;K7ER44;K7ELJ8;K7EJ24	Q99615-2;Q99615;K7EPP7;K7ESP1;K7EIH8	DnaJ homolog subfamily C member 7	DNAJC7
2.71782	2.46582	2.53943	NaN	NaN	NaN	+		3	3	3	13	13	13	27.079	3.1165	136430000	24509000	111920000	3.07391	2.57436	0	NaN	J9JIE6;Q9UM00-2;Q9UM00;J3QQY2;J3KS45;J3KTQ7	J9JIE6;Q9UM00-2;Q9UM00;J3QQY2	Transmembrane and coiled-coil domain-containing protein 1	TMCO1
NaN	2.57352	2.57175	NaN	NaN	NaN	+		6	6	6	42.9	42.9	42.9	16.953	18.555	171900000	42357000	129540000	3.65949	2.57263	0	NaN	Q56VL3	Q56VL3	OCIA domain-containing protein 2	OCIAD2
3.09026	3.06611	1.53908	NaN	NaN	NaN			7	7	7	24.5	24.5	24.5	36.923	44.419	279930000	53011000	226920000	1.42301	2.56515	0	NaN	M0QXB4;O14579;A0A087X0I4;O14579-3;O14579-2;M0R061	M0QXB4;O14579;A0A087X0I4;O14579-3;O14579-2;M0R061	Coatomer subunit epsilon	COPE
NaN	2.3374	2.69334	NaN	NaN	NaN			4	4	4	14.9	14.9	14.9	28.202	7.4799	203500000	40908000	162590000	1.34709	2.51537	0	NaN	Q9BVV7;J3QRI1	Q9BVV7;J3QRI1	Mitochondrial import inner membrane translocase subunit Tim21	TIMM21
2.60651	2.29878	2.51412	NaN	NaN	NaN	+		6	6	6	23.6	23.6	23.6	32.182	29.816	272770000	62579000	210190000	2.86768	2.47314	0	NaN	I3L1P8;Q02978;Q02978-2	I3L1P8;Q02978;Q02978-2	Mitochondrial 2-oxoglutarate/malate carrier protein	SLC25A11
2.52062	2.48563	2.35098	NaN	NaN	NaN	+		3	3	3	32.1	32.1	32.1	9.3697	4.7281	165130000	38726000	126410000	3.35228	2.45241	0	NaN	O00483	O00483	Cytochrome c oxidase subunit NDUFA4	NDUFA4
2.43928	2.38959	NaN	NaN	NaN	NaN	+		4	4	4	7.6	7.6	7.6	72.063	5.0219	57951000	12213000	45737000	2.18377	2.41444	0	NaN	Q6P1M0;Q6P1M0-2	Q6P1M0	Long-chain fatty acid transport protein 4	SLC27A4
2.32288	2.21887	2.36681	NaN	NaN	NaN	+		7	7	7	25.1	25.1	25.1	45.809	49.718	1593400000	384860000	1208500000	3.44056	2.30286	0	NaN	O14965;A3KFJ0;Q5QPD4;A3KFJ1;Q5QPD2	O14965;A3KFJ0;Q5QPD4	Aurora kinase A	AURKA
2.32043	2.21369	2.15218	NaN	NaN	NaN	+		2	2	2	15.2	15.2	15.2	26.925	50.355	199280000	43514000	155760000	3.31341	2.22877	0	NaN	E9PG39;E9PC15;Q53H12	E9PG39;E9PC15;Q53H12	Acylglycerol kinase, mitochondrial	AGK
2.03319	2.00759	2.2865	NaN	NaN	NaN	+		9	9	5	19.9	19.9	14	67.819	52.994	902740000	220600000	682140000	2.75048	2.10909	0	NaN	P26038;V9GZ54	P26038	Moesin	MSN
1.69662	2.45383	2.07974	NaN	NaN	NaN			6	6	6	15.9	15.9	15.9	52.569	16.213	467220000	141520000	325700000	1.96263	2.07673	0	NaN	Q9Y5X2;C9J8E6;C9J014;C9J271;C9JCB9	Q9Y5X2;C9J8E6;C9J014;C9J271	Sorting nexin-8	SNX8
1.73613	2.32783	2.00623	NaN	NaN	NaN	+		9	9	0	26.7	26.7	0	48.099	81.297	394570000	107370000	287200000	2.15066	2.0234	0	NaN	B4DLN1;F6QW41	B4DLN1
2.17236	1.74855	2.0858	NaN	NaN	NaN	+		7	4	4	11.8	6.9	6.9	82.968	8.2209	2733600000	149750000	2583800000	2.38266	2.00224	0	NaN	F5H365;Q15436;G3V4V1;G3V1W4;G3V3G5;G3V2R6;G3V5X8;G3V4Q2;Q15436-2;G3V5K1	F5H365;Q15436;G3V4V1;G3V1W4;G3V3G5;G3V2R6	Protein transport protein Sec23A	SEC23A
1.98732	1.9775	2.01643	NaN	NaN	NaN	+		12	12	12	35.2	35.2	35.2	38.711	32.581	1897800000	583600000	1314200000	4.46393	1.99375	0	NaN	Q9NYK5;Q9NYK5-2;C9JG87	Q9NYK5;Q9NYK5-2;C9JG87	39S ribosomal protein L39, mitochondrial	MRPL39
1.78182	1.87133	2.02237	NaN	NaN	NaN	+		5	5	5	15.5	15.5	15.5	45.745	32.833	1170200000	340430000	829750000	2.86208	1.89184	0	NaN	O60884	O60884	DnaJ homolog subfamily A member 2	DNAJA2
1.52682	2.00364	2.1333	NaN	NaN	NaN			5	5	5	10.1	10.1	10.1	86.233	22.14	116710000	32761000	83948000	2.02666	1.88792	0	NaN	Q13618-2;Q13618;Q13618-3;H7C399;H7C1L6;A0A087WTG3	Q13618-2;Q13618;Q13618-3	Cullin-3	CUL3
1.9293	2.00874	1.70969	NaN	NaN	NaN	+		9	8	8	42.8	42.8	42.8	27.228	23.268	1622500000	479960000	1142600000	2.64797	1.88257	0	NaN	O95292;E5RK64;O95292-2	O95292	Vesicle-associated membrane protein-associated protein B/C	VAPB
2.10148	1.80999	1.72788	NaN	NaN	NaN	+		3	3	3	21.6	21.6	21.6	31.362	46.781	611700000	183790000	427910000	2.44169	1.87978	0	NaN	Q07021;I3L3Q7;I3L3B0	Q07021;I3L3Q7;I3L3B0	Complement component 1 Q subcomponent-binding protein, mitochondrial	C1QBP
1.8614	2.02581	1.59187	NaN	NaN	NaN	+		4	4	4	9.3	9.3	9.3	52.541	33.442	1198900000	364060000	834830000	2.3222	1.82636	0	NaN	J3QRS9;X6R4W8;O43670-2;O43670;O43670-4;J3KS31;O43670-3;J3QS27;J3KTL1;J3KRB6;J3KRW6;H0Y3M2	J3QRS9;X6R4W8;O43670-2;O43670;O43670-4;J3KS31;O43670-3	BUB3-interacting and GLEBS motif-containing protein ZNF207	ZNF207
1.714	1.75591	1.62887	NaN	NaN	NaN	+		7	7	7	25.2	25.2	25.2	34.834	33.437	492180000	191400000	300770000	3.31582	1.69959	0	NaN	P60891;B1ALA9;A0A0B4J207;P60891-2;P21108;P11908;P11908-2;B7ZB02;B1ALA7;A6NMS2;H7C540;D3YTJ7	P60891;B1ALA9;A0A0B4J207;P60891-2;P21108;P11908;P11908-2;B7ZB02	Ribose-phosphate pyrophosphokinase 1;Ribose-phosphate pyrophosphokinase 3;Ribose-phosphate pyrophosphokinase 2	PRPS1;PRPS1L1;PRPS2
1.48151	1.66998	1.6984	NaN	NaN	NaN	+		7	6	6	8.6	7.7	7.7	93.673	13.676	478200000	155970000	322240000	2.75263	1.61663	0	NaN	Q8TCJ2	Q8TCJ2	Dolichyl-diphosphooligosaccharide--protein glycosyltransferase subunit STT3B	STT3B
1.65178	1.58895	1.5432	NaN	NaN	NaN	+		5	5	5	25.5	25.5	25.5	31.077	17.797	523440000	183110000	340330000	3.40973	1.59464	0	NaN	B0QZ43;O75477;E5RHW4;O94905;E5RJ09;O94905-2;O94905-3	B0QZ43;O75477;E5RHW4;O94905	Erlin-1;Erlin-2	ERLIN1;ERLIN2
2.16855	1.31028	1.26388	NaN	NaN	NaN			2	2	2	12.4	12.4	12.4	24.763	13.054	123360000	41008000	82356000	1.4826	1.5809	0	NaN	P24534;F8WF65;F2Z2G2;C9JZW3	P24534;F8WF65;F2Z2G2;C9JZW3	Elongation factor 1-beta	EEF1B2
1.64764	1.61405	1.45812	NaN	NaN	NaN	+		8	8	8	32.6	32.6	32.6	33.239	72.39	782460000	265440000	517020000	2.86189	1.57327	0	NaN	J3KPX7;Q99623;F5GY37;Q99623-2;F5H3X6;F5GWA7;F5H2D2;F5H0C5	J3KPX7;Q99623;F5GY37;Q99623-2;F5H3X6;F5GWA7	Prohibitin-2	PHB2
1.67785	1.43771	1.48378	NaN	NaN	NaN	+		5	5	5	17.4	17.4	17.4	34.012	13.238	963030000	417410000	545620000	2.63912	1.53311	0	NaN	P53007;B4DP62	P53007	Tricarboxylate transport protein, mitochondrial	SLC25A1
1.29766	1.78902	1.37573	NaN	NaN	NaN			4	3	3	34.8	29.6	29.6	15.397	9.6012	114640000	52842000	61798000	1.98543	1.48747	0	NaN	F6RFD5;P60981;P60981-2	F6RFD5;P60981;P60981-2	Destrin	DSTN
1.35789	1.64076	1.38979	NaN	NaN	NaN	+		6	6	6	31.1	31.1	31.1	26.411	25.091	400770000	136840000	263930000	2.42965	1.46281	0	NaN	P28066;P28066-2	P28066;P28066-2	Proteasome subunit alpha type-5	PSMA5
1.66494	1.43002	1.16208	NaN	NaN	NaN			3	3	3	32.6	32.6	32.6	14.013	2.9834	64465000	26181000	38284000	1.9864	1.41901	0	NaN	I3L1U7;I3L0X9;I3L3T0;P57737-3;A0A0A6YYL4;Q9Y3D7	I3L1U7;I3L0X9;I3L3T0;P57737-3;A0A0A6YYL4;Q9Y3D7	Coronin;Mitochondrial import inner membrane translocase subunit TIM16	PAM16;CORO7-PAM16
NaN	1.20207	1.33039	NaN	NaN	NaN			3	3	3	8.7	8.7	8.7	58.182	15.193	189640000	62627000	127010000	1.49176	1.26623	0	NaN	M0QWZ7;Q9NP81;Q9NP81-2;M0QX29;M0R259;M0R2C6;M0R2H5;B4DJM9	M0QWZ7;Q9NP81;Q9NP81-2;M0QX29;M0R259;M0R2C6	Serine--tRNA ligase, mitochondrial	SARS2
1.46905	1.54374	0.751635	NaN	NaN	NaN			3	3	3	6.3	6.3	6.3	74.535	7.1041	52922000	18165000	34758000	1.41805	1.25481	0	NaN	Q9NYY8-2;Q9NYY8	Q9NYY8-2;Q9NYY8	FAST kinase domain-containing protein 2	FASTKD2
1.26135	1.0285	1.40425	NaN	NaN	NaN			2	2	2	16.3	16.3	16.3	14.395	2.0307	662890000	257510000	405380000	2.10705	1.23137	0	NaN	Q9NZJ9-3;Q9NZJ9-2;F8VRL4;F8VRR0;A0A0C4DGJ4;Q96G61;Q8NFP7;Q9NZJ9	Q9NZJ9-3;Q9NZJ9-2;F8VRL4;F8VRR0;A0A0C4DGJ4;Q96G61;Q8NFP7;Q9NZJ9	Diphosphoinositol polyphosphate phosphohydrolase 2;Diphosphoinositol polyphosphate phosphohydrolase 3-beta;Diphosphoinositol polyphosphate phosphohydrolase 3-alpha	NUDT4;NUDT11;NUDT10
1.31156	0.915483	1.34608	NaN	NaN	NaN			3	3	3	4.6	4.6	4.6	77.719	3.562	40047000	16062000	23985000	1.87988	1.19104	0	NaN	A0A0A0MR50;Q13619-2;Q13619;A6NE76;K4DI93;Q13620-3;Q13620-1;Q13620;A0A087WWN2	A0A0A0MR50;Q13619-2;Q13619;A6NE76;K4DI93;Q13620-3;Q13620-1;Q13620	Cullin-4A;Cullin-4B	CUL4A;CUL4B
1.20552	1.39265	0.961549	NaN	NaN	NaN			5	4	4	27.8	22.5	22.5	16.32	8.8028	803640000	344990000	458650000	1.96324	1.18657	0	NaN	O15511;B1ALC0;O15511-2	O15511;B1ALC0;O15511-2	Actin-related protein 2/3 complex subunit 5	ARPC5
1.20439	1.15205	1.19919	NaN	NaN	NaN	+		4	4	4	19.1	19.1	19.1	29.541	9.9174	161970000	62561000	99405000	3.70509	1.18521	0	NaN	H0YJC0;A0A087X2I1;P62333;H0YJS8;H0YJE9;H0YJT1	H0YJC0;A0A087X2I1;P62333;H0YJS8	26S protease regulatory subunit 10B	PSMC6
1.10949	1.17581	1.012	NaN	NaN	NaN	+		3	3	3	28.6	28.6	28.6	16.464	17.199	170280000	71892000	98387000	2.72855	1.0991	0	NaN	A0A0U1RRH9;A0A0U1RRE1;G3V1Q4;E7ES33;E7EPK1;Q16181-2;Q16181;Q6ZU15	A0A0U1RRH9;A0A0U1RRE1;G3V1Q4;E7ES33;E7EPK1;Q16181-2;Q16181	Septin-7	2016-09-07
0.923644	1.35004	1.02326	NaN	NaN	NaN			3	3	3	28.3	28.3	28.3	15.928	8.3474	950990000	439820000	511170000	1.8711	1.09898	0	NaN	C9JKI3;E9PCT5;Q03135-2;Q03135;P56539	C9JKI3;E9PCT5;Q03135-2;Q03135	Caveolin;Caveolin-1	CAV1
1.05499	1.03154	1.17447	NaN	NaN	NaN	+		6	6	6	19.7	19.7	19.7	48.349	40.574	875180000	333220000	541960000	2.78157	1.087	0	NaN	O75616;J3QSB2;J3QRV9;O75616-2;K7EQJ8;J3QT61	O75616;J3QSB2;J3QRV9;O75616-2	GTPase Era, mitochondrial	ERAL1
1.12697	1.16652	0.962512	NaN	NaN	NaN	+		10	10	10	48.3	48.3	48.3	20.546	49.554	3817700000	1753500000	2064200000	2.48202	1.08534	0	NaN	O15145;C9JZD1;F8VR50	O15145;C9JZD1	Actin-related protein 2/3 complex subunit 3	ARPC3
1.05672	1.26123	0.839798	NaN	NaN	NaN			13	13	13	10.1	10.1	10.1	152.2	37.308	2154900000	904630000	1250300000	1.88271	1.05258	0	NaN	Q13428-3;E7ETY2;Q13428-8;Q13428-7;Q13428;Q13428-4;J3KQ96;Q13428-2;Q13428-6;Q13428-5;H0YA99	Q13428-3;E7ETY2;Q13428-8;Q13428-7;Q13428;Q13428-4;J3KQ96;Q13428-2;Q13428-6;Q13428-5	Treacle protein	TCOF1
1.15342	1.13534	0.826843	NaN	NaN	NaN			6	6	5	32	32	26.8	16.941	33.155	912300000	418050000	494250000	1.98917	1.03853	0	NaN	Q9BPX5	Q9BPX5	Actin-related protein 2/3 complex subunit 5-like protein	ARPC5L
1.29555	0.869398	0.942608	NaN	NaN	NaN			7	7	7	37.7	37.7	37.7	20.05	13.751	142270000	57665000	84607000	1.80272	1.03585	0	NaN	Q9NRX2;E9PKV2	Q9NRX2;E9PKV2	39S ribosomal protein L17, mitochondrial	MRPL17
1.00798	NaN	1.05575	NaN	NaN	NaN			10	1	1	24.3	7.2	7.2	49.775	70.54	1232000000	492090000	739950000	1.83173	1.03187	0	NaN	Q3ZCM7;A0A075B736;Q5SQY0	Q3ZCM7;A0A075B736;Q5SQY0	Tubulin beta-8 chain	TUBB8
0.978269	NaN	1.08427	NaN	NaN	NaN			1	1	1	7.3	7.3	7.3	16.686	2.6594	30556000	15110000	15447000	1.4856	1.03127	0	NaN	D6RBD7;C9J1V9;O43324-2;O43324	D6RBD7;C9J1V9;O43324-2;O43324	Eukaryotic translation elongation factor 1 epsilon-1	EEF1E1;EEF1E1-BLOC1S5
1.22083	0.818114	0.98083	NaN	NaN	NaN			3	3	3	16.5	16.5	16.5	27.013	9.9715	335980000	143570000	192410000	1.87829	1.00659	0	NaN	Q9HBH1	Q9HBH1	Peptide deformylase, mitochondrial	PDF
1.0256	1.09153	0.891264	NaN	NaN	NaN	+		13	13	12	45.2	45.2	39	40.949	81.341	6043100000	2663100000	3380000000	2.46406	1.0028	0	NaN	O15143;C9J4Z7;F8VXW2;C9JEY1;C9JQM8;C9JFG9;C9J6C8;C9JBJ7;C9K057;C9JTT6;C9JM51;F8WEB3	O15143	Actin-related protein 2/3 complex subunit 1B	ARPC1B
NaN	NaN	NaN	NaN	NaN	NaN			2	2	2	72.9	72.9	72.9	5.0107	9.3512	34647000	26684000	7962700	0	NaN	0	NaN	H3BT36;A0A024RA52;P25787;H7C402	H3BT36;A0A024RA52;P25787;H7C402	Proteasome subunit alpha type;Proteasome subunit alpha type-2	PSMA2
NaN	NaN	NaN	NaN	NaN	NaN			1	1	1	17.8	17.8	17.8	20.398	26.589	32867000	32867000	0	0	NaN	0	NaN	G8JLL2;A0A0G2JK02;A0A0G2JIU6;A0A0G2JHB6;A0A0G2JKR3;A0A0G2JLL3;A0A0G2JLA3;A0A0G2JH76;A0A024RCQ8;Q9UMR5-2;Q9UMR5;Q9UMR5-3	G8JLL2;A0A0G2JK02;A0A0G2JIU6;A0A0G2JHB6;A0A0G2JKR3;A0A0G2JLL3;A0A0G2JLA3;A0A0G2JH76;A0A024RCQ8;Q9UMR5-2;Q9UMR5;Q9UMR5-3	Lysosomal thioesterase PPT2	PPT2;hCG_1999928
NaN	NaN	NaN	NaN	NaN	NaN			2	1	1	0.5	0.3	0.3	426.09	2.9829	67148000	67148000	0	0	NaN	0	NaN	A0A087WV90;E9PDN5;A0A087WTU7;A0A075B6G3;P11532-4;P11532;P11532-3;P11532-2	A0A087WV90;E9PDN5;A0A087WTU7;A0A075B6G3;P11532-4;P11532;P11532-3;P11532-2	Dystrophin	DMD
NaN	NaN	NaN	NaN	NaN	NaN			3	3	3	37.7	37.7	37.7	11.208	7.9927	233730000	233730000	0	0	NaN	0	NaN	A0A075B6L0;A0A075B6K9;P0CG06;P0CG05;A0A075B6K8;A0A0B4J231;P0CG04;P0CF74;B9A064;A0A075B6L1;A0M8Q6	A0A075B6L0;A0A075B6K9;P0CG06;P0CG05;A0A075B6K8;A0A0B4J231;P0CG04;P0CF74;B9A064	Ig lambda-3 chain C regions;Ig lambda-2 chain C regions;Ig lambda-1 chain C regions;Ig lambda-6 chain C region;Immunoglobulin lambda-like polypeptide 5	IGLC3;IGLC2;IGLC1;IGLL5;IGLC6
NaN	NaN	NaN	NaN	NaN	NaN			1	1	1	9.4	9.4	9.4	13.012	3.9355	2075300	2075300	0	0	NaN	0	NaN	A0A075B7D0	A0A075B7D0		IGHV1OR15-1
NaN	NaN	NaN	NaN	NaN	NaN			1	1	1	36.8	36.8	36.8	8.803	16.99	10485000	10485000	0	0	NaN	0	NaN	A0A087WTC8;L0R6P0;P86397	A0A087WTC8;L0R6P0;P86397	Hydroxyacyl-thioester dehydratase type 2, mitochondrial	RPP14
NaN	NaN	NaN	NaN	NaN	NaN			1	1	1	14.8	14.8	14.8	16.533	1.8958	11395000	11395000	0	0	NaN	0	NaN	A0A0C4DGY8;D6RA00;A0A087WTH0;Q9UHY7-2;Q9UHY7	A0A0C4DGY8;D6RA00;A0A087WTH0;Q9UHY7-2;Q9UHY7	Enolase-phosphatase E1	ENOPH1
NaN	NaN	NaN	NaN	NaN	NaN			2	1	1	11.8	6.5	6.5	25.868	7.1646	15369000	15369000	0	0	NaN	0	NaN	A0A087WTV6;J3KR12;Q96C36;A0A087WZR9	A0A087WTV6;J3KR12;Q96C36;A0A087WZR9	Pyrroline-5-carboxylate reductase 2;Pyrroline-5-carboxylate reductase	PYCR2
NaN	NaN	NaN	NaN	NaN	NaN			1	1	1	6.7	6.7	6.7	27.015	2.443	0	0	0	0	NaN	0	NaN	A0A087WTZ5;E9PJ81;E9PRQ7;Q04323;Q04323-2	A0A087WTZ5;E9PJ81;E9PRQ7;Q04323;Q04323-2	UBX domain-containing protein 1	UBXN1
NaN	NaN	NaN	NaN	NaN	NaN			2	2	2	17.5	17.5	17.5	22.911	1.7615	3559200	0	3559200	0	NaN	0	NaN	A0A087WU14;A0A087WXB0;O15126	A0A087WU14;A0A087WXB0;O15126	Secretory carrier-associated membrane protein 1	SCAMP1
NaN	NaN	NaN	NaN	NaN	NaN			1	1	1	7.8	7.8	7.8	29.408	1.8081	11123000	3967500	7155900	0	NaN	0	NaN	A0A0G2JMS5;A0A087WU62;A0A087X2D5;Q9BRJ2	A0A0G2JMS5;A0A087WU62;A0A087X2D5;Q9BRJ2	39S ribosomal protein L45, mitochondrial	MRPL45
NaN	NaN	NaN	NaN	NaN	NaN			19	1	1	39.7	4.1	4.1	40.04	7.6035	81721000	59070000	22652000	0	NaN	0	NaN	A0A087WUK2;O14979	A0A087WUK2;O14979	Heterogeneous nuclear ribonucleoprotein D-like	HNRNPDL
NaN	NaN	NaN	NaN	NaN	NaN			2	2	2	23.4	23.4	23.4	12.082	2.3985	23674000	8921700	14752000	0	NaN	0	NaN	A0A087WXQ8;A0A087WY10;A0A087WUL2;P49720	A0A087WXQ8;A0A087WY10;A0A087WUL2;P49720	Proteasome subunit beta type-3	PSMB3
NaN	NaN	NaN	NaN	NaN	NaN			1	1	1	21.6	21.6	21.6	9.3804	4.3961	46466000	46466000	0	0	NaN	0	NaN	Q5T123;A0A087WV23;Q9H299	Q5T123;A0A087WV23;Q9H299	SH3 domain-binding glutamic acid-rich-like protein 3	SH3BGRL3
NaN	NaN	NaN	NaN	NaN	NaN			1	1	1	19.2	19.2	19.2	5.7856	1.8096	21847000	5340500	16506000	0	NaN	0	NaN	J3KSI4;I3L405;I3L261;I3L1D2;I3L4E0;J3QS48;I3L295;J3KTK8;J3QQZ4;J3KT75;J3QW43;J3QRD5;Q9H3L2;Q1HDL3;A0A087WV81;O75352-2;O75352	J3KSI4;I3L405;I3L261;I3L1D2;I3L4E0;J3QS48;I3L295;J3KTK8;J3QQZ4;J3KT75;J3QW43;J3QRD5;Q9H3L2;Q1HDL3;A0A087WV81;O75352-2;O75352	Mannose-P-dolichol utilization defect 1 protein	MPDU1;HBEBP2BPA
NaN	NaN	NaN	NaN	NaN	NaN			6	6	6	9	9	9	125.38	6.6094	16381000	0	16381000	0	NaN	0	NaN	A0A087WVA8;Q8IWB9;Q8IWB9-2;J3KRZ8	A0A087WVA8;Q8IWB9;Q8IWB9-2;J3KRZ8	Testis-expressed sequence 2 protein	TEX2
NaN	NaN	NaN	NaN	NaN	NaN			1	1	1	34	34	34	4.9969	7.7197	11775000	3359300	8415700	0	NaN	0	NaN	A0A087WY94;A0A087WVD7;Q9Y3D8	A0A087WY94;A0A087WVD7;Q9Y3D8	Adenylate kinase isoenzyme 6	TAF9;AK6
NaN	NaN	NaN	NaN	NaN	NaN			1	1	1	20.8	20.8	20.8	8.0493	3.7403	70898000	47839000	23059000	0	NaN	0	NaN	A0A087WVZ3;K7EL62;P29992	A0A087WVZ3;K7EL62;P29992	Guanine nucleotide-binding protein subunit alpha-11	GNA11
NaN	NaN	NaN	NaN	NaN	NaN			1	1	1	5.5	5.5	5.5	72.976	21.846	57221000	57221000	0	0	NaN	0	NaN	E9PJ21;A0A087WWI4;K7EQK2;A0A087X054;Q9Y4L1-2;Q9Y4L1	E9PJ21;A0A087WWI4;K7EQK2;A0A087X054;Q9Y4L1-2;Q9Y4L1	Hypoxia up-regulated protein 1	HYOU1
NaN	NaN	NaN	NaN	NaN	NaN			1	1	1	5	5	5	31.102	3.2321	26483000	16681000	9801700	0	NaN	0	NaN	A0A087WY55;Q9NP79	A0A087WY55;Q9NP79	Vacuolar protein sorting-associated protein VTA1 homolog	VTA1
NaN	NaN	NaN	NaN	NaN	NaN			3	3	3	2.6	2.6	2.6	155.29	4.5979	11614000	7287800	4326400	0	NaN	0	NaN	A0A087WYN9;Q7Z478	A0A087WYN9;Q7Z478	ATP-dependent RNA helicase DHX29	DHX29
NaN	NaN	NaN	NaN	NaN	NaN			1	1	1	12	12	12	16.929	2.9547	22258000	4341600	17917000	0	NaN	0	NaN	C9JWG0;C9JVG3;C9JQU9;C9JNZ1;A0A087WYS1;E7EUC7;Q16851-2;Q16851	C9JWG0;C9JVG3;C9JQU9;C9JNZ1;A0A087WYS1;E7EUC7;Q16851-2;Q16851	UTP--glucose-1-phosphate uridylyltransferase	UGP2
NaN	NaN	NaN	NaN	NaN	NaN			1	1	1	7.9	7.9	7.9	19.155	7.7564	54936000	15633000	39303000	0	NaN	0	NaN	A0A087WYT3;Q15185-2;Q15185-3;Q15185-4;Q15185	A0A087WYT3;Q15185-2;Q15185-3;Q15185-4;Q15185	Prostaglandin E synthase 3	PTGES3
NaN	NaN	NaN	NaN	NaN	NaN			1	1	1	2	2	2	94.623	6.773	15899000	11615000	4284400	0	NaN	0	NaN	A0A087X072;A0A087WZ30;O94761	A0A087X072;A0A087WZ30;O94761	ATP-dependent DNA helicase Q4	RECQL4
NaN	NaN	NaN	NaN	NaN	NaN			1	1	1	9.3	9.3	9.3	15.428	3.0045	13690000	4572000	9117600	0	NaN	0	NaN	A0A087X0N2;O15243	A0A087X0N2;O15243	Leptin receptor gene-related protein	LEPROT
NaN	NaN	NaN	NaN	NaN	NaN			1	1	1	11	11	11	19.825	20.495	38759000	36529000	2229800	0	NaN	0	NaN	A0A087X0R6;Q9UMY4-3;Q9UMY4-2;Q9UMY4	A0A087X0R6;Q9UMY4-3;Q9UMY4-2;Q9UMY4	Sorting nexin-12	SNX12
NaN	NaN	NaN	NaN	NaN	NaN			3	3	3	4.9	4.9	4.9	77.249	7.9423	38008000	1148100	36860000	0	NaN	0	NaN	A0A087X176;Q6ZRP7;H0Y430	A0A087X176;Q6ZRP7;H0Y430	Sulfhydryl oxidase;Sulfhydryl oxidase 2	QSOX2
NaN	NaN	NaN	NaN	NaN	NaN			2	2	2	2.3	2.3	2.3	114.16	2.4069	355540	266370	89169	0	NaN	0	NaN	A0A087X1N2;Q03701	A0A087X1N2;Q03701	CCAAT/enhancer-binding protein zeta	CEBPZ
NaN	NaN	NaN	NaN	NaN	NaN			1	1	1	2.3	2.3	2.3	94.611	2.4225	35418000	15688000	19730000	0	NaN	0	NaN	A0A087X239;Q6PCB5-2;Q6PCB5	A0A087X239;Q6PCB5-2;Q6PCB5	Round spermatid basic protein 1-like protein	RSBN1L
NaN	NaN	NaN	NaN	NaN	NaN			2	1	1	18.9	11.5	11.5	16.498	7.5811	9102700	7363500	1739200	0	NaN	0	NaN	K7ES69;A0A087X271;B4DDF4;B4DUT8;Q99439-2;Q99439	K7ES69;A0A087X271;B4DDF4;B4DUT8;Q99439-2;Q99439	Calponin;Calponin-2	CNN2
NaN	NaN	NaN	NaN	NaN	NaN			4	4	4	25.9	25.9	25.9	22.31	47.954	89386000	87426000	1960200	0	NaN	0	NaN	A0A0A0MQT0;P09455;A0A0A0MTB9;H0YAK8;P09455-2;P09455-3	A0A0A0MQT0;P09455;A0A0A0MTB9;H0YAK8;P09455-2;P09455-3	Retinol-binding protein 1	RBP1
NaN	NaN	NaN	NaN	NaN	NaN			3	3	3	25.9	25.9	25.9	18.388	3.3804	39209000	2408700	36801000	0	NaN	0	NaN	Q5T092;A0A0A0MR06;Q5T091;Q9P0H9;O15258;Q5T093	Q5T092;A0A0A0MR06;Q5T091;Q9P0H9;O15258	Protein RER1	RER1
NaN	NaN	NaN	NaN	NaN	NaN			2	2	2	2.5	2.5	2.5	110.36	4.7574	129670000	66706000	62964000	0	NaN	0	NaN	A0A0A0MR66;P98175-4;P98175-3;P98175-2;P98175	A0A0A0MR66;P98175-4;P98175-3;P98175-2;P98175	RNA-binding protein 10	RBM10
NaN	NaN	NaN	NaN	NaN	NaN			1	1	1	11.5	11.5	11.5	11.075	2.2756	5432900	5432900	0	0	NaN	0	NaN	K7ES20;K7ENC6;J3QRG6;A0A0A0MRI0;P42771-2;P42772;P42771;P42771-4	K7ES20;K7ENC6;J3QRG6;A0A0A0MRI0;P42771-2;P42772;P42771;P42771-4	Cyclin-dependent kinase inhibitor 2A;Cyclin-dependent kinase 4 inhibitor B	CDKN2A;CDKN2B
NaN	NaN	NaN	NaN	NaN	NaN			7	1	1	6.2	1.1	1.1	122.86	2.0536	670030	455550	214470	0	NaN	0	NaN	A0A0A0MRP6;B7ZLQ5;P28370-2;P28370	A0A0A0MRP6;B7ZLQ5;P28370-2;P28370	Probable global transcription activator SNF2L1	SMARCA1
NaN	NaN	NaN	NaN	NaN	NaN			2	2	2	22.4	22.4	22.4	24.381	16.185	86152000	85951000	200910	0	NaN	0	NaN	Q5T770;A0A0A0MT32;Q5T073;P38571-2;P38571	Q5T770;A0A0A0MT32;Q5T073;P38571-2;P38571	Lysosomal acid lipase/cholesteryl ester hydrolase	LIPA
NaN	NaN	NaN	NaN	NaN	NaN			1	1	1	0.9	0.9	0.9	148.86	2.376	35910000	22618000	13292000	0	NaN	0	NaN	A0A0A0MT33;O95104-2;O95104-3;O95104;Q9UPN6;Q9UPN6-2	A0A0A0MT33;O95104-2;O95104-3;O95104;Q9UPN6;Q9UPN6-2	Splicing factor, arginine/serine-rich 15;Protein SCAF8	SCAF8;SCAF4
NaN	NaN	NaN	NaN	NaN	NaN			3	3	3	2.1	2.1	2.1	188.15	3.9424	47093000	26425000	20668000	0	NaN	0	NaN	Q9HBD4;A0A0A0MT49;P51532-5;P51532-2;P51532-3;P51532-4;P51532;A0A0U1RQZ9;F6VDE0;P51531-2;P51531	Q9HBD4;A0A0A0MT49;P51532-5;P51532-2;P51532-3;P51532-4;P51532	Transcription activator BRG1	SMARCA4
NaN	NaN	NaN	NaN	NaN	NaN			1	1	1	3.6	3.6	3.6	31.869	2.3383	52279000	18391000	33888000	0	NaN	0	NaN	D6RDV0;D6RA37;A0A0A0MTC2;D6RIY7;Q13454-2;Q13454	D6RDV0;D6RA37;A0A0A0MTC2;D6RIY7;Q13454-2;Q13454	Tumor suppressor candidate 3	TUSC3
NaN	NaN	NaN	NaN	NaN	NaN			1	1	1	16.5	16.5	16.5	11.15	3.4059	53422000	50955000	2467200	0	NaN	0	NaN	B8ZWD1;A0A0A0MTI5;P07108;P07108-3;P07108-2;P07108-6;P07108-4;P07108-5	B8ZWD1;A0A0A0MTI5;P07108;P07108-3;P07108-2;P07108-6;P07108-4;P07108-5	Acyl-CoA-binding protein	DBI
NaN	NaN	NaN	NaN	NaN	NaN			2	2	2	5.9	5.9	5.9	49.91	55.873	51737000	51737000	0	0	NaN	0	NaN	A0A0B4J1R6;P29401;P29401-2	A0A0B4J1R6;P29401;P29401-2	Transketolase	TKT
NaN	NaN	NaN	NaN	NaN	NaN			1	1	1	1.9	1.9	1.9	84.159	1.8349	15202000	12120000	3082100	0	NaN	0	NaN	A0A0C4DFN1;Q8IWA4	A0A0C4DFN1;Q8IWA4	Mitofusin-1	MFN1
NaN	NaN	NaN	NaN	NaN	NaN			1	1	1	4.2	4.2	4.2	48.116	3.7968	8281600	0	8281600	0	NaN	0	NaN	A0A0G2JR20;A0A0C4DG71;A0A0G2JQM2;A0A0G2JR50;Q86SQ7-3;Q86SQ7-4;Q86SQ7	A0A0G2JR20;A0A0C4DG71;A0A0G2JQM2;A0A0G2JR50;Q86SQ7-3;Q86SQ7-4;Q86SQ7	Serologically defined colon cancer antigen 8	SDCCAG8
NaN	NaN	NaN	NaN	NaN	NaN			1	1	1	0.6	0.6	0.6	169.58	1.955	4641000	3014800	1626200	0	NaN	0	NaN	A0A0C4DG98;Q8NI27	A0A0C4DG98;Q8NI27	THO complex subunit 2	THOC2
NaN	NaN	NaN	NaN	NaN	NaN			4	4	4	3	3	3	217.1	14.807	8222900	7623600	599300	0	NaN	0	NaN	F5GWX5;A0A0C4DGG9;Q14839;Q14839-2;K7EMY3;F2Z2R5;Q8TDI0	F5GWX5;A0A0C4DGG9;Q14839;Q14839-2	Chromodomain-helicase-DNA-binding protein 4	CHD4
NaN	NaN	NaN	NaN	NaN	NaN			2	2	2	3.1	3.1	3.1	85.408	4.1912	17500000	7789800	9710200	0	NaN	0	NaN	A0A0C4DGH5;Q86VP6-2;Q86VP6	A0A0C4DGH5;Q86VP6-2;Q86VP6	Cullin-associated NEDD8-dissociated protein 1	CAND1
NaN	NaN	NaN	NaN	NaN	NaN			1	1	1	12.7	12.7	12.7	12.478	2.233	12088000	0	12088000	0	NaN	0	NaN	K7EQ66;K7ELZ9;K7ENM2;A0A0C4DGP7;K7EMW4;Q969V3-2;Q969V3	K7EQ66;K7ELZ9;K7ENM2;A0A0C4DGP7;K7EMW4;Q969V3-2;Q969V3	Nicalin	NCLN
NaN	NaN	NaN	NaN	NaN	NaN			1	1	1	6.9	6.9	6.9	23.885	7.9661	7890000	4982100	2907900	0	NaN	0	NaN	K7EQI2;A0A0C4DGP8;K7EJF0;Q96ST8-3;Q96ST8	K7EQI2;A0A0C4DGP8;K7EJF0;Q96ST8-3;Q96ST8	Centrosomal protein of 89 kDa	CEP89
NaN	NaN	NaN	NaN	NaN	NaN			2	2	2	16.4	16.4	16.4	15.727	8.4037	8665300	0	8665300	0	NaN	0	NaN	H7C5F7;B4DGY6;A0A0C4DGW0;Q9NV92	H7C5F7;B4DGY6;A0A0C4DGW0;Q9NV92	NEDD4 family-interacting protein 2	NDFIP2
NaN	NaN	NaN	NaN	NaN	NaN			1	1	1	2.8	2.8	2.8	87.387	3.4379	3525800	3525800	0	0	NaN	0	NaN	A0A0C4DGX4;Q13616	A0A0C4DGX4;Q13616	Cullin-1	CUL1
NaN	NaN	NaN	NaN	NaN	NaN			1	1	1	1.5	1.5	1.5	107.43	1.8075	3535000	1874000	1661100	0	NaN	0	NaN	E7EXA6;A0A0D9SF58;Q8WVB6-3;Q8WVB6;Q8WVB6-2	E7EXA6;A0A0D9SF58;Q8WVB6-3;Q8WVB6;Q8WVB6-2	Chromosome transmission fidelity protein 18 homolog	CHTF18
NaN	NaN	NaN	NaN	NaN	NaN			1	1	1	40.6	40.6	40.6	7.29	48.996	14517000	14517000	0	0	NaN	0	NaN	A0A0D9SF88;A0A0D9SFW0;Q9HCE5	A0A0D9SF88;A0A0D9SFW0;Q9HCE5	N6-adenosine-methyltransferase subunit METTL14	METTL14
NaN	NaN	NaN	NaN	NaN	NaN			1	1	1	1.6	1.6	1.6	99.015	1.8271	11297000	5951100	5346000	0	NaN	0	NaN	E9PFG7;A0A0D9SFS3;E9PDF2;E9PCR7;Q02218-3;Q02218-2;Q02218	E9PFG7;A0A0D9SFS3;E9PDF2;E9PCR7;Q02218-3;Q02218-2;Q02218	2-oxoglutarate dehydrogenase, mitochondrial	OGDH
NaN	NaN	NaN	NaN	NaN	NaN			1	1	1	4.3	4.3	4.3	36.43	5.9806	28356000	18768000	9587300	0	NaN	0	NaN	Q5JRC6;A0A0D9SGE8;Q8IWS0-4;Q8IWS0-2;Q8IWS0-5;Q8IWS0-3;Q8IWS0	Q5JRC6;A0A0D9SGE8;Q8IWS0-4;Q8IWS0-2;Q8IWS0-5;Q8IWS0-3;Q8IWS0	PHD finger protein 6	PHF6
NaN	NaN	NaN	NaN	NaN	NaN			6	1	1	23.2	4.4	4.4	36.508	1.955	10738000	10076000	662540	0	NaN	0	NaN	A0A0G2JMB2;P01877;A0A075B6N7	A0A0G2JMB2;P01877;A0A075B6N7	Ig alpha-2 chain C region	IGHA2
NaN	NaN	NaN	NaN	NaN	NaN			9	1	1	25.9	5.5	5.5	32.057	2.0964	905600	697610	207990	0	NaN	0	NaN	A0A0G2JPF8;P0DMR1;O60812;B7ZW38;A0A0G2JNQ3;B2RXH8	A0A0G2JPF8;P0DMR1;O60812;B7ZW38;A0A0G2JNQ3;B2RXH8	Heterogeneous nuclear ribonucleoprotein C-like 4;Heterogeneous nuclear ribonucleoprotein C-like 1;Heterogeneous nuclear ribonucleoprotein C-like 3;Heterogeneous nuclear ribonucleoprotein C-like 2	HNRNPCL4;HNRNPCL1;HNRNPCL3;HNRNPCL2
NaN	NaN	NaN	NaN	NaN	NaN			1	1	1	6.4	6.4	6.4	25.74	2.6015	11884000	1478300	10406000	0	NaN	0	NaN	A0A0G2JRI7;A0A0G2JQ62;Q8NF37	A0A0G2JRI7;A0A0G2JQ62;Q8NF37	Lysophosphatidylcholine acyltransferase 1	LPCAT1
NaN	NaN	NaN	NaN	NaN	NaN			2	2	2	12.3	12.3	12.3	26.722	3.5123	1922600	0	1922600	0	NaN	0	NaN	A0A0G2JQ92;Q96BW9-2;Q96BW9-3;Q96BW9;H7C1A2;G3V0F3;B4E101	A0A0G2JQ92;Q96BW9-2;Q96BW9-3;Q96BW9;H7C1A2;G3V0F3;B4E101	Phosphatidate cytidylyltransferase, mitochondrial	TAMM41
NaN	NaN	NaN	NaN	NaN	NaN			1	1	1	12.1	12.1	12.1	11.856	3.6613	23631000	19658000	3972800	0	NaN	0	NaN	A0A0G2JQN5;Q9BV57-2;Q9BV57	A0A0G2JQN5;Q9BV57-2;Q9BV57	1,2-dihydroxy-3-keto-5-methylthiopentene dioxygenase	ADI1
NaN	NaN	NaN	NaN	NaN	NaN			1	1	1	16	16	16	9.094	2.7215	5601800	3898800	1703000	0	NaN	0	NaN	A0A0U1RQQ2;A0A0U1RRB8;C9JTA6;A0A0G2JSE9;G5E975;Q12824-2;Q12824	A0A0U1RQQ2;A0A0U1RRB8;C9JTA6;A0A0G2JSE9;G5E975;Q12824-2;Q12824	SWI/SNF-related matrix-associated actin-dependent regulator of chromatin subfamily B member 1	SMARCB1
NaN	NaN	NaN	NaN	NaN	NaN			1	1	1	11.4	11.4	11.4	23.585	2.6819	16440000	16074000	366350	0	NaN	0	NaN	A0A0U1RQD1;Q9NQ88	A0A0U1RQD1;Q9NQ88	Fructose-2,6-bisphosphatase TIGAR	TIGAR
NaN	NaN	NaN	NaN	NaN	NaN			2	2	2	3.2	3.2	3.2	88.051	3.0511	16850000	0	16850000	0	NaN	0	NaN	A0A0U1RRL8;Q8TB22-3;Q8TB22;Q8TB22-2;H0Y9M1;Q8TB22-4	A0A0U1RRL8;Q8TB22-3;Q8TB22;Q8TB22-2;H0Y9M1;Q8TB22-4	Spermatogenesis-associated protein 20	SPATA20
NaN	NaN	NaN	NaN	NaN	NaN			2	2	2	3.1	3.1	3.1	72.688	2.6873	31242000	19129000	12113000	0	NaN	0	NaN	A0A5E8;Q99501;Q99501-3;Q99501-2;Q99501-4	A0A5E8;Q99501;Q99501-3;Q99501-2;Q99501-4	GAS2-like protein 1	GAS2L1
NaN	NaN	NaN	NaN	NaN	NaN			1	1	1	5	5	5	22.049	3.2256	5541100	892970	4648100	0	NaN	0	NaN	A0PJW6	A0PJW6	Transmembrane protein 223	TMEM223
NaN	NaN	NaN	NaN	NaN	NaN			1	1	1	1.6	1.6	1.6	67.017	1.9442	477760000	296650000	181110000	0	NaN	0	NaN	A6NC98-3;A6NC98-2;A6NC98-4;A6NC98	A6NC98-3;A6NC98-2;A6NC98-4;A6NC98	Coiled-coil domain-containing protein 88B	CCDC88B
NaN	NaN	NaN	NaN	NaN	NaN			6	1	1	4.5	0.7	0.7	197.62	7.6101	0	0	0	0	NaN	0	NaN	J3KNE0;Q7Z3J3;A6NKT7	J3KNE0;Q7Z3J3;A6NKT7	RanBP2-like and GRIP domain-containing protein 4;RanBP2-like and GRIP domain-containing protein 3	RGPD3;RGPD4
NaN	NaN	NaN	NaN	NaN	NaN			1	1	1	8.1	8.1	8.1	32.5	2.7758	3420600	3009000	411550	0	NaN	0	NaN	A6PVX1;H0Y532;Q13228-2;Q13228-3;Q13228;Q13228-4	A6PVX1;H0Y532;Q13228-2;Q13228-3;Q13228;Q13228-4	Selenium-binding protein 1	SELENBP1
NaN	NaN	NaN	NaN	NaN	NaN			1	1	1	17.9	17.9	17.9	9.4786	2.1374	360390	145920	214470	0	NaN	0	NaN	B8ZZ09;B8ZZ10;A8MYV2;Q9NQ29-2;Q9NQ29-3;Q9NQ29	B8ZZ09;B8ZZ10;A8MYV2;Q9NQ29-2;Q9NQ29-3;Q9NQ29	Putative RNA-binding protein Luc7-like 1	LUC7L
NaN	NaN	NaN	NaN	NaN	NaN			1	1	1	64	64	64	2.7752	2.4839	0	0	0	0	NaN	0	NaN	F8WB30;F8WAW7;F8WE29;F8WBB0;H7BYN7;Q6UW50;B0QY01;O60784-3;O60784;O60784-2	F8WB30;F8WAW7;F8WE29;F8WBB0;H7BYN7;Q6UW50;B0QY01;O60784-3;O60784;O60784-2	Target of Myb protein 1	TOM1
NaN	NaN	NaN	NaN	NaN	NaN			2	2	2	12.9	12.9	12.9	24.982	12.729	23639000	13330000	10308000	0	NaN	0	NaN	B1AH49;P25325;P25325-2	B1AH49;P25325;P25325-2	Sulfurtransferase;3-mercaptopyruvate sulfurtransferase	MPST
NaN	NaN	NaN	NaN	NaN	NaN			1	1	1	41.2	41.2	41.2	5.7065	5.188	4572500	4572500	0	0	NaN	0	NaN	B1AH56;B1AH58;H0Y6C7;F5GZ09;Q9BW83-2;Q9BW83	B1AH56;B1AH58;H0Y6C7;F5GZ09;Q9BW83-2;Q9BW83	Intraflagellar transport protein 27 homolog	IFT27
NaN	NaN	NaN	NaN	NaN	NaN			1	1	1	2.4	2.4	2.4	62.57	2.0863	818760	546430	272330	0	NaN	0	NaN	B1AMT4;Q68DW7;Q8WVM7-2;Q8N3U4;Q8WVM7;Q8N3U4-2	B1AMT4;Q68DW7;Q8WVM7-2;Q8N3U4;Q8WVM7;Q8N3U4-2	Cohesin subunit SA-1;Cohesin subunit SA-2	STAG2;DKFZp781D1416;STAG1
NaN	NaN	NaN	NaN	NaN	NaN			2	2	2	23.7	23.7	23.7	15.105	3.4824	18325000	10965000	7360000	0	NaN	0	NaN	R4GNH9;R4GMQ7;B1AMU7;B1AMU4;Q9Y3B2;B1AMU3	R4GNH9;R4GMQ7;B1AMU7;B1AMU4;Q9Y3B2;B1AMU3	Exosome complex component CSL4	EXOSC1
NaN	NaN	NaN	NaN	NaN	NaN			1	1	1	7.3	7.3	7.3	19.401	3.148	8456800	8252200	204560	0	NaN	0	NaN	B1AN99;P35030-5;P35030-3;P35030-2;P35030-4;P35030	B1AN99;P35030-5;P35030-3;P35030-2;P35030-4;P35030	Trypsin-3	PRSS3
NaN	NaN	NaN	NaN	NaN	NaN			33	1	1	13	0.4	0.4	234.23	1.8202	6947100	1013500	5933600	0	NaN	0	NaN	B1PS43;P35749-4;P35749-3;P35749;P35749-2;P13533	B1PS43;P35749-4;P35749-3;P35749;P35749-2	Myosin-11	MYH11
NaN	NaN	NaN	NaN	NaN	NaN			1	1	1	14.4	14.4	14.4	23.384	61.224	81068000	81068000	0	0	NaN	0	NaN	B4DFG2;K7ENL2;K7EMC9;Q969T9	B4DFG2;K7ENL2;K7EMC9;Q969T9	WW domain-binding protein 2	WBP2
NaN	NaN	NaN	NaN	NaN	NaN			3	3	3	43.8	43.8	43.8	21.531	20.367	34298000	34298000	0	0	NaN	0	NaN	Q49AI2;B4DML3;Q86WA6-2;Q86WA6	Q49AI2;B4DML3;Q86WA6-2;Q86WA6	Valacyclovir hydrolase	BPHL
NaN	NaN	NaN	NaN	NaN	NaN			2	2	2	9.6	9.6	9.6	29.559	13.695	107990000	15322000	92672000	0	NaN	0	NaN	B5MD23;O75954	B5MD23;O75954	Tetraspanin;Tetraspanin-9	TSPAN9
NaN	NaN	NaN	NaN	NaN	NaN			1	1	1	3.1	3.1	3.1	42.426	2.2276	1710900	754980	955890	0	NaN	0	NaN	B7Z9I1;Q5T4U5;P11310;P11310-2	B7Z9I1;Q5T4U5;P11310;P11310-2	Medium-chain specific acyl-CoA dehydrogenase, mitochondrial	ACADM
NaN	NaN	NaN	NaN	NaN	NaN			1	1	1	25.5	25.5	25.5	5.1899	2.3493	18423000	9871900	8551400	0	NaN	0	NaN	B8ZZ54;P61604	B8ZZ54;P61604	10 kDa heat shock protein, mitochondrial	HSPE1
NaN	NaN	NaN	NaN	NaN	NaN			2	2	2	29.5	29.5	29.5	18.398	88.762	181110000	180480000	630860	0	NaN	0	NaN	B8ZZK2;O75223-2;O75223-4;O75223;A0A0B4J1Y4;H7BZK5;O75223-3	B8ZZK2;O75223-2;O75223-4;O75223;A0A0B4J1Y4;H7BZK5;O75223-3	Gamma-glutamylcyclotransferase	GGCT
NaN	NaN	NaN	NaN	NaN	NaN			1	1	1	18.1	18.1	18.1	12.649	10.773	6068900	6068900	0	0	NaN	0	NaN	Q5THN1;C9IZA0;Q9Y5Z4-2;Q9Y5Z4	Q5THN1;C9IZA0;Q9Y5Z4-2;Q9Y5Z4	Heme-binding protein 2	HEBP2
NaN	NaN	NaN	NaN	NaN	NaN			1	1	1	38.8	38.8	38.8	7.1315	3.5694	11551000	11551000	0	0	NaN	0	NaN	C9IZI0;F8WFC2;C9JLV6;C9JF79;P40925;P40925-3	C9IZI0;F8WFC2;C9JLV6;C9JF79;P40925;P40925-3	Malate dehydrogenase;Malate dehydrogenase, cytoplasmic	MDH1
NaN	NaN	NaN	NaN	NaN	NaN			2	2	2	36.1	36.1	36.1	8.6718	3.945	39514000	10789000	28724000	0	NaN	0	NaN	H7BZC5;C9IZS4;C9JQ02;C9JV99;C9J673;C9JKM9;O14980;F8WF71	H7BZC5;C9IZS4;C9JQ02;C9JV99;C9J673;C9JKM9;O14980;F8WF71	Exportin-1	XPO1
NaN	NaN	NaN	NaN	NaN	NaN			1	1	1	21	21	21	8.9804	2.1361	4139800	4139800	0	0	NaN	0	NaN	C9J5B6;C9JGM0;Q96GK7;Q6P2I3	C9J5B6;C9JGM0;Q96GK7;Q6P2I3	Fumarylacetoacetate hydrolase domain-containing protein 2A;Fumarylacetoacetate hydrolase domain-containing protein 2B	FAHD2A;FAHD2B
NaN	NaN	NaN	NaN	NaN	NaN			1	1	1	6.9	6.9	6.9	23.539	5.5017	12100000	5553800	6546400	0	NaN	0	NaN	C9J8H1;P36543-2;P36543	C9J8H1;P36543-2;P36543	V-type proton ATPase subunit E 1	ATP6V1E1
NaN	NaN	NaN	NaN	NaN	NaN			1	1	1	17.1	17.1	17.1	8.1675	4.9897	65078000	61037000	4041300	0	NaN	0	NaN	C9JA05;D6RHJ6;D6RD17;P01591	C9JA05;D6RHJ6;D6RD17;P01591	Immunoglobulin J chain	JCHAIN;IGJ
NaN	NaN	NaN	NaN	NaN	NaN			1	1	1	33.3	33.3	33.3	5.5992	3.0335	2202700	2202700	0	0	NaN	0	NaN	C9JAL2;C9JIA8;Q2TAL8	C9JAL2;C9JIA8;Q2TAL8	Glutamine-rich protein 1	QRICH1
NaN	NaN	NaN	NaN	NaN	NaN			1	1	1	19.4	19.4	19.4	11.901	6.7505	23570000	23570000	0	0	NaN	0	NaN	H7C585;C9JAX1;Q16595	H7C585;C9JAX1;Q16595	Frataxin, mitochondrial;Frataxin intermediate form;Frataxin(56-210);Frataxin(78-210);Frataxin mature form	FXN
NaN	NaN	NaN	NaN	NaN	NaN			1	1	1	11	11	11	8.6247	4.302	214530000	131850000	82682000	0	NaN	0	NaN	C9JB87;Q0VAA5-2;Q0VAA5	C9JB87;Q0VAA5-2;Q0VAA5	PI-PLC X domain-containing protein 2	PLCXD2
NaN	NaN	NaN	NaN	NaN	NaN			1	1	1	22.4	22.4	22.4	5.8575	7.2405	137460000	53353000	84107000	0	NaN	0	NaN	C9JB90;C9JU14;J3KR73;P20340-4;Q9NRW1-2;Q9NRW1;P20340-2;P20340;Q14964	C9JB90;C9JU14;J3KR73;P20340-4;Q9NRW1-2;Q9NRW1;P20340-2;P20340;Q14964	Ras-related protein Rab-6A;Ras-related protein Rab-6B;Ras-related protein Rab-39A	RAB6B;RAB6A;RAB39A
NaN	NaN	NaN	NaN	NaN	NaN			1	1	1	28.3	28.3	28.3	6.256	22.052	19353000	17121000	2232000	0	NaN	0	NaN	C9JBU9;C9JQ41;H7C525;Q4VC31	C9JBU9;C9JQ41;H7C525;Q4VC31	Coiled-coil domain-containing protein 58	CCDC58
NaN	NaN	NaN	NaN	NaN	NaN			1	1	1	4.9	4.9	4.9	24.608	1.7929	5025400	0	5025400	0	NaN	0	NaN	C9JBW9;Q6J272-2;Q6J272	C9JBW9;Q6J272-2;Q6J272	Protein FAM166A	FAM166A
NaN	NaN	NaN	NaN	NaN	NaN			1	1	1	10.7	10.7	10.7	12.728	2.376	33277000	6915700	26362000	0	NaN	0	NaN	C9JC63;E7EVY0;S4R3Q9;J3KNA0;Q15070-3;Q15070-2;Q15070	C9JC63;E7EVY0;S4R3Q9;J3KNA0;Q15070-3;Q15070-2;Q15070	Mitochondrial inner membrane protein OXA1L	OXA1L
NaN	NaN	NaN	NaN	NaN	NaN			2	2	2	15.6	15.6	15.6	23.653	4.0714	49852000	34346000	15505000	0	NaN	0	NaN	C9JEV9;O95639-3;O95639-2;O95639;F8WEL7;B7Z7B0;H7C419	C9JEV9;O95639-3;O95639-2;O95639;F8WEL7;B7Z7B0;H7C419	Cleavage and polyadenylation specificity factor subunit 4	CPSF4
NaN	NaN	NaN	NaN	NaN	NaN			1	1	1	5.1	5.1	5.1	24.158	6.429	1013800	1013800	0	0	NaN	0	NaN	C9JF17;P05090	C9JF17;P05090	Apolipoprotein D	APOD
NaN	NaN	NaN	NaN	NaN	NaN			2	2	2	17.8	17.8	17.8	11.333	10.756	76677000	76677000	0	0	NaN	0	NaN	C9JFR7;P99999	C9JFR7;P99999	Cytochrome c	CYCS
NaN	NaN	NaN	NaN	NaN	NaN			3	3	3	22.2	22.2	22.2	29.736	27.698	72990000	48364000	24625000	0	NaN	0	NaN	C9JHG2;Q14699;G3XAJ6;C9JWQ9;F8WAR1;C9JRN3	C9JHG2;Q14699;G3XAJ6	Raftlin	RFTN1
NaN	NaN	NaN	NaN	NaN	NaN			2	2	2	10.8	10.8	10.8	26.028	6.5983	6259900	2144500	4115400	0	NaN	0	NaN	C9JLK2;H7C393;H7C1U0;C9JIF9;P13798	C9JLK2;H7C393;H7C1U0;C9JIF9;P13798	Acylamino-acid-releasing enzyme	APEH
NaN	NaN	NaN	NaN	NaN	NaN			1	1	1	6.9	6.9	6.9	22.217	3.086	18372000	10160000	8211500	0	NaN	0	NaN	C9JJU7;Q9NSI2-2;Q9NSI2	C9JJU7;Q9NSI2-2;Q9NSI2	Protein FAM207A	FAM207A
NaN	NaN	NaN	NaN	NaN	NaN			1	1	1	1.5	1.5	1.5	96.827	3.6156	7152300	4449100	2703200	0	NaN	0	NaN	C9JJX6;E9PDC3;O00192-2;O00192	C9JJX6;E9PDC3;O00192-2;O00192	Armadillo repeat protein deleted in velo-cardio-facial syndrome	ARVCF
NaN	NaN	NaN	NaN	NaN	NaN			1	1	1	32.7	32.7	32.7	5.7044	35.795	37645000	35858000	1786700	0	NaN	0	NaN	C9JL85;P58546	C9JL85;P58546	Myotrophin	MTPN
NaN	NaN	NaN	NaN	NaN	NaN			1	1	1	60	60	60	2.1494	11.808	0	0	0	0	NaN	0	NaN	J3QL22;J3QS85;J3KTQ1;J3QKR0;C9JLV5;Q9UNS2	J3QL22;J3QS85;J3KTQ1;J3QKR0;C9JLV5;Q9UNS2	COP9 signalosome complex subunit 3	COPS3
NaN	NaN	NaN	NaN	NaN	NaN			2	2	2	9.7	9.7	9.7	23.643	2.3542	60549000	22583000	37966000	0	NaN	0	NaN	C9JNK6;O75431-2;O75431;C9JAZ1	C9JNK6;O75431-2;O75431;C9JAZ1	Metaxin-2	MTX2
NaN	NaN	NaN	NaN	NaN	NaN			2	2	2	24	24	24	11.503	3.2343	37907000	11053000	26854000	0	NaN	0	NaN	C9JNQ3;Q14558;Q14558-2;C9JKT9;C9JUN4;C9J168;B4DP31	C9JNQ3;Q14558;Q14558-2;C9JKT9;C9JUN4;C9J168;B4DP31	Phosphoribosyl pyrophosphate synthase-associated protein 1	PRPSAP1
NaN	NaN	NaN	NaN	NaN	NaN			2	2	2	9.6	9.6	9.6	24.506	3.6408	5847400	0	5847400	0	NaN	0	NaN	C9JRY4;C9JNZ0;Q96IW7;F8WAU7;C9JR77;C9J463;C9JZ27;C9JDJ8	C9JRY4;C9JNZ0;Q96IW7;F8WAU7;C9JR77;C9J463;C9JZ27;C9JDJ8	Vesicle-trafficking protein SEC22a	SEC22A
NaN	NaN	NaN	NaN	NaN	NaN			2	2	2	33.9	33.9	33.9	6.8708	3.3537	35874000	0	35874000	0	NaN	0	NaN	F8WF90;C9JQU6;F8WF33;O75915	F8WF90;C9JQU6;F8WF33;O75915	PRA1 family protein 3	ARL6IP5
NaN	NaN	NaN	NaN	NaN	NaN			1	1	1	12.3	12.3	12.3	11.698	1.8028	710260	0	710260	0	NaN	0	NaN	E5RIL0;H0YBC1;C9JVM4;E5RJS9;E5RHU8;O95214;O95214-2	E5RIL0;H0YBC1;C9JVM4;E5RJS9;E5RHU8;O95214;O95214-2	Leptin receptor overlapping transcript-like 1	LEPROTL1
NaN	NaN	NaN	NaN	NaN	NaN			1	1	1	10.9	10.9	10.9	15.324	3.3966	18930000	9778600	9151400	0	NaN	0	NaN	C9JYM0;O75817	C9JYM0;O75817	Ribonuclease P protein subunit p20	POP7
NaN	NaN	NaN	NaN	NaN	NaN			2	2	2	16.4	16.4	16.4	18.822	3.6647	11141000	2163200	8977400	0	NaN	0	NaN	D3DVS1;Q5BJH2	D3DVS1;Q5BJH2	Transmembrane protein 128	TMEM128
NaN	NaN	NaN	NaN	NaN	NaN			1	1	1	5.8	5.8	5.8	18.67	2.1484	1094500	688650	405870	0	NaN	0	NaN	H0Y9L5;D6R905;D6RIY6;Q06265-3;Q06265-4;Q06265;Q06265-2	H0Y9L5;D6R905;D6RIY6;Q06265-3;Q06265-4;Q06265;Q06265-2	Exosome complex component RRP45	EXOSC9
NaN	NaN	NaN	NaN	NaN	NaN			31	1	1	81.4	6	6	36.471	25.855	115850000	57122000	58727000	0	NaN	0	NaN	D6R9W4	D6R9W4		DBN1
NaN	NaN	NaN	NaN	NaN	NaN			1	1	1	15.1	15.1	15.1	11.385	3.1711	9631700	7639000	1992700	0	NaN	0	NaN	D6RA77;Q9BPZ3	D6RA77;Q9BPZ3	Polyadenylate-binding protein-interacting protein 2	PAIP2
NaN	NaN	NaN	NaN	NaN	NaN			3	2	2	42.9	36.5	36.5	19.047	127.69	188260000	187420000	840080	0	NaN	0	NaN	D6RD69;Q9Y6B6;D6RAA2;D6RDB2;D6R9R5;Q9H029	D6RD69;Q9Y6B6;D6RAA2;D6RDB2	GTP-binding protein SAR1b	SAR1B
NaN	NaN	NaN	NaN	NaN	NaN			1	1	1	30.6	30.6	30.6	4.346	2.0135	7539300	5197700	2341600	0	NaN	0	NaN	D6RHH0;U3KQT3;D6RDI2;J3KPP4;O95232	D6RHH0;U3KQT3;D6RDI2;J3KPP4;O95232	Luc7-like protein 3	LUC7L3
NaN	NaN	NaN	NaN	NaN	NaN			1	1	1	6.1	6.1	6.1	18.121	6.0529	10471000	459540	10011000	0	NaN	0	NaN	E2QRG8;Q00765	E2QRG8;Q00765	Receptor expression-enhancing protein;Receptor expression-enhancing protein 5	REEP5
NaN	NaN	NaN	NaN	NaN	NaN			1	1	1	10.3	10.3	10.3	12.865	2.8553	10891000	3751900	7139300	0	NaN	0	NaN	E5RFU0;E5RHK9;E9PKP6;E9PI56;E5RFC6;E5RK51;E5RIJ5;E9PLJ8;E5RGY9;E9PDG8;Q13492-4;O60641-3;Q13492-3;Q13492-2;Q13492-5;Q13492;O60641-4;O60641	E5RFU0;E5RHK9;E9PKP6;E9PI56;E5RFC6;E5RK51;E5RIJ5;E9PLJ8;E5RGY9;E9PDG8;Q13492-4;O60641-3;Q13492-3;Q13492-2;Q13492-5;Q13492;O60641-4;O60641	Phosphatidylinositol-binding clathrin assembly protein;Clathrin coat assembly protein AP180	SNAP91;PICALM
NaN	NaN	NaN	NaN	NaN	NaN			1	1	1	7.1	7.1	7.1	23.007	3.0322	91082000	32489000	58593000	0	NaN	0	NaN	E5RFR9;Q00005-6;Q00005;Q00005-2;P63151;Q00005-3;Q66LE6;P63151-2;Q00005-4;Q00005-5;Q00005-7	E5RFR9;Q00005-6;Q00005;Q00005-2;P63151;Q00005-3;Q66LE6;P63151-2;Q00005-4;Q00005-5;Q00005-7	Serine/threonine-protein phosphatase 2A 55 kDa regulatory subunit B beta isoform;Serine/threonine-protein phosphatase 2A 55 kDa regulatory subunit B alpha isoform;Serine/threonine-protein phosphatase 2A 55 kDa regulatory subunit B delta isoform	PPP2R2A;PPP2R2B;PPP2R2D
NaN	NaN	NaN	NaN	NaN	NaN			3	3	3	25.4	25.4	25.4	20.861	187.14	402110000	402110000	0	0	NaN	0	NaN	E5RGR0;O75608-2;O75608;B4DP64;E5RJ48;A0A087X1K9	E5RGR0;O75608-2;O75608;B4DP64	Acyl-protein thioesterase 1	LYPLA1
NaN	NaN	NaN	NaN	NaN	NaN			2	2	2	13.3	13.3	13.3	25.827	9.4847	15617000	14511000	1106100	0	NaN	0	NaN	H0YB83;E5RH53;Q96DB5-3;Q96DB5-2;Q96DB5;E5RGC8;H0YB03	H0YB83;E5RH53;Q96DB5-3;Q96DB5-2;Q96DB5;E5RGC8;H0YB03	Regulator of microtubule dynamics protein 1	RMDN1
NaN	NaN	NaN	NaN	NaN	NaN			2	2	2	20.6	20.6	20.6	17.487	4.6723	8307500	583010	7724400	0	NaN	0	NaN	E5RI16;Q9NUQ9;E5RK61;E5RFS4;E5RHU5;E5RGI7;E5RJE1;E5RIR8;E5RJL8	E5RI16;Q9NUQ9;E5RK61;E5RFS4;E5RHU5;E5RGI7;E5RJE1;E5RIR8;E5RJL8	Protein FAM49B	FAM49B
NaN	NaN	NaN	NaN	NaN	NaN			1	1	1	15.2	15.2	15.2	10.993	7.4397	59114000	45844000	13270000	0	NaN	0	NaN	E5RIV7;Q8IV48	E5RIV7;Q8IV48	3-5 exoribonuclease 1	ERI1
NaN	NaN	NaN	NaN	NaN	NaN			1	1	1	7.7	7.7	7.7	18.336	2.3902	5291800	1435200	3856500	0	NaN	0	NaN	E5RK82;E5RJF8;O15182	E5RK82;E5RJF8;O15182	Centrin-3	CETN3
NaN	NaN	NaN	NaN	NaN	NaN			1	1	1	6.5	6.5	6.5	19.531	2.367	11878000	2144500	9733700	0	NaN	0	NaN	E9PJI4;E9PPA5;E9PKQ3;J3KN87;E7EPP6;O14757-2;O14757-3;O14757	E9PJI4;E9PPA5;E9PKQ3;J3KN87;E7EPP6;O14757-2;O14757-3;O14757	Serine/threonine-protein kinase Chk1	CHEK1
NaN	NaN	NaN	NaN	NaN	NaN			1	1	1	5.9	5.9	5.9	23.712	4.0631	194420000	12580000	181840000	0	NaN	0	NaN	E7ERK6;H0YC35;H0YLK8;P10909-3;P10909-4;P10909;P10909-5;P10909-2	E7ERK6;H0YC35;H0YLK8;P10909-3;P10909-4;P10909;P10909-5;P10909-2	Clusterin;Clusterin;Clusterin beta chain;Clusterin alpha chain	CLU
NaN	NaN	NaN	NaN	NaN	NaN			1	1	1	30.5	30.5	30.5	6.382	9.6837	25651000	17804000	7846500	0	NaN	0	NaN	E9PRI2;E7ESM3;Q7L2H7	E9PRI2;E7ESM3;Q7L2H7	Eukaryotic translation initiation factor 3 subunit M	EIF3M
NaN	NaN	NaN	NaN	NaN	NaN			2	2	2	1.9	1.9	1.9	118.25	2.7317	399860000	281300000	118560000	0	NaN	0	NaN	E7ET15;O15042-3;O15042-2;O15042;H7C4V2	E7ET15;O15042-3;O15042-2;O15042;H7C4V2	U2 snRNP-associated SURP motif-containing protein	U2SURP
NaN	NaN	NaN	NaN	NaN	NaN			46	1	1	36.8	0.6	0.6	158.64	2.3642	146200000	96917000	49285000	0	NaN	0	NaN	E7EX73;E9PGM1;E7EUU4;Q04637-8;Q04637-7;A0A0A0MR52;C9K073;C9J2Z7;H7C044;H7C0V6;A0A0A0MSA7;A0A0U1RQK7;O43432-4;O43432;O43432-3;F8WCF2;C9JWH7;C9J556;REV__Q8NEG2-2;REV__F5H7J8;C9JHW9;C9JSU8;C9JWW9;REV__Q8NEG2;REV__C9JQZ6;REV__J3KQX6	E7EX73;E9PGM1;E7EUU4;Q04637-8;Q04637-7;A0A0A0MR52	Eukaryotic translation initiation factor 4 gamma 1	EIF4G1
NaN	NaN	NaN	NaN	NaN	NaN			2	2	2	2.4	2.4	2.4	120.65	1.9831	11046000	7568900	3477200	0	NaN	0	NaN	E7EVH3;Q92576-2;Q92576;D6R9X2;E9PE34;B3KP41;E7ER40	E7EVH3;Q92576-2;Q92576;D6R9X2;E9PE34;B3KP41;E7ER40	PHD finger protein 3	PHF3
NaN	NaN	NaN	NaN	NaN	NaN			4	4	4	9.6	9.6	9.6	51.218	4.7349	8508300	0	8508300	0	NaN	0	NaN	E9PAM4;Q9BTU6	E9PAM4;Q9BTU6	Phosphatidylinositol 4-kinase type 2-alpha	PI4K2A
NaN	NaN	NaN	NaN	NaN	NaN			2	2	2	40.8	40.8	40.8	7.813	11.234	46050000	28231000	17819000	0	NaN	0	NaN	F8W1N5;F8VZJ2;F8VNW4;F8W0W4;H0YHX9;Q13765;E9PAV3-2;E9PAV3	F8W1N5;F8VZJ2;F8VNW4;F8W0W4;H0YHX9;Q13765;E9PAV3-2;E9PAV3	Nascent polypeptide-associated complex subunit alpha;Nascent polypeptide-associated complex subunit alpha, muscle-specific form	NACA
NaN	NaN	NaN	NaN	NaN	NaN			120	1	1	25.7	0.2	0.2	633.66	3.6732	25103000	14044000	11058000	0	NaN	0	NaN	F6QMI7;E9PEB9;E7ETB9;Q5T0V7;Q03001-11	F6QMI7;E9PEB9		DST
NaN	NaN	NaN	NaN	NaN	NaN			1	1	1	1.8	1.8	1.8	75.959	2.0395	0	0	0	0	NaN	0	NaN	E9PGM4;Q04446	E9PGM4;Q04446	1,4-alpha-glucan-branching enzyme	GBE1
NaN	NaN	NaN	NaN	NaN	NaN			1	1	1	11.9	11.9	11.9	21.01	32.942	97557000	97557000	0	0	NaN	0	NaN	H7C1D4;E9PGT1;Q15631	H7C1D4;E9PGT1;Q15631	Translin	TSN
NaN	NaN	NaN	NaN	NaN	NaN			2	2	2	17.3	17.3	17.3	22.042	22.814	131390000	29911000	101480000	0	NaN	0	NaN	E9PHS0;O43813	E9PHS0;O43813	LanC-like protein 1	LANCL1
NaN	NaN	NaN	NaN	NaN	NaN			3	3	3	3.5	3.5	3.5	96.454	2.9326	23939000	17831000	6108100	0	NaN	0	NaN	E9PIF2;Q13206	E9PIF2;Q13206	Probable ATP-dependent RNA helicase DDX10	DDX10
NaN	NaN	NaN	NaN	NaN	NaN			2	2	2	11	11	11	24.262	4.1779	49137000	2038200	47099000	0	NaN	0	NaN	E9PJC4;E9PQY7;E9PS99;E9PL78;E9PJM1;E9PMQ9;E9PSI1;O15321-2;O15321	E9PJC4;E9PQY7;E9PS99;E9PL78;E9PJM1;E9PMQ9;E9PSI1;O15321-2;O15321	Transmembrane 9 superfamily member 1	TM9SF1
NaN	NaN	NaN	NaN	NaN	NaN			1	1	1	15	15	15	18.259	47.279	76941000	76941000	0	0	NaN	0	NaN	E9PMI6;E9PJF4;J3KN38;P54105	E9PMI6;E9PJF4;J3KN38;P54105	Methylosome subunit pICln	CLNS1A
NaN	NaN	NaN	NaN	NaN	NaN			4	4	4	5.9	5.9	5.9	83.231	6.0191	125950000	78885000	47066000	0	NaN	0	NaN	E9PK09;E9PQN2;E9PKI6;E9PK91;Q9NYF8-4;Q9NYF8-3;Q9NYF8-2;Q9NYF8;E9PJA7;H0YF00	E9PK09;E9PQN2;E9PKI6;E9PK91;Q9NYF8-4;Q9NYF8-3;Q9NYF8-2;Q9NYF8;E9PJA7;H0YF00	Bcl-2-associated transcription factor 1	BCLAF1
NaN	NaN	NaN	NaN	NaN	NaN			1	1	1	12.5	12.5	12.5	11.082	2.3328	8722800	0	8722800	0	NaN	0	NaN	I3L3B4;F8W9H0;E9PLN8;Q9BQB6-3;Q9BQB6-2;Q9BQB6	I3L3B4;F8W9H0;E9PLN8;Q9BQB6-3;Q9BQB6-2;Q9BQB6	Vitamin K epoxide reductase complex subunit 1	VKORC1
NaN	NaN	NaN	NaN	NaN	NaN			1	1	1	22.6	22.6	22.6	5.9968	2.7299	18598000	7816800	10781000	0	NaN	0	NaN	E9PR04;E9PQR7;E9PM90;Q9UK41;Q9UK41-2	E9PR04;E9PQR7;E9PM90;Q9UK41;Q9UK41-2	Vacuolar protein sorting-associated protein 28 homolog	VPS28
NaN	NaN	NaN	NaN	NaN	NaN			1	1	1	4	4	4	24.482	3.1663	2441300	152310	2289000	0	NaN	0	NaN	E9PNA1;G3V150;O94766-2;O94766	E9PNA1;G3V150;O94766-2;O94766	Galactosylgalactosylxylosylprotein 3-beta-glucuronosyltransferase 3	B3GAT3
NaN	NaN	NaN	NaN	NaN	NaN			2	2	2	21.6	21.6	21.6	12.516	4.5769	3397200	2379400	1017900	0	NaN	0	NaN	E9PRR7;Q14331;E9PLY7;Q9BZ01	E9PRR7;Q14331;E9PLY7;Q9BZ01	Protein FRG1;Protein FRG1B	FRG1;FRG1B
NaN	NaN	NaN	NaN	NaN	NaN			1	1	1	6.2	6.2	6.2	30.638	2.5571	1781700	357820	1423900	0	NaN	0	NaN	F2Z2Y4;O00764-2;O00764	F2Z2Y4;O00764-2;O00764	Pyridoxal kinase	PDXK
NaN	NaN	NaN	NaN	NaN	NaN			1	1	1	38.7	38.7	38.7	6.9099	16.127	27760000	26860000	900150	0	NaN	0	NaN	H0YG71;F5GWX2;Q9NRV9	H0YG71;F5GWX2;Q9NRV9	Heme-binding protein 1	HEBP1
NaN	NaN	NaN	NaN	NaN	NaN			1	1	1	10.5	10.5	10.5	26.505	10.639	11415000	11415000	0	0	NaN	0	NaN	F5GX11;P25786;P25786-2	F5GX11;P25786;P25786-2	Proteasome subunit alpha type-1	PSMA1
NaN	NaN	NaN	NaN	NaN	NaN			1	1	1	16.5	16.5	16.5	8.5974	4.3101	19314000	7908300	11405000	0	NaN	0	NaN	H0YFI1;F5H479;F5GX19;F5H3Y3;Q6IAA8	H0YFI1;F5H479;F5GX19;F5H3Y3;Q6IAA8	Ragulator complex protein LAMTOR1	LAMTOR1
NaN	NaN	NaN	NaN	NaN	NaN			1	1	1	10.7	10.7	10.7	18.592	2.7953	13292000	13292000	0	0	NaN	0	NaN	H3BU66;H3BPM5;H3BQX0;H3BNY8;H3BMZ9;H3BPP3;H3BP57;H3BT48;H3BUZ9;F5GX71;H3BPB8;P34949	H3BU66;H3BPM5;H3BQX0;H3BNY8;H3BMZ9;H3BPP3;H3BP57;H3BT48;H3BUZ9;F5GX71;H3BPB8;P34949	Mannose-6-phosphate isomerase	MPI
NaN	NaN	NaN	NaN	NaN	NaN			1	1	1	10.7	10.7	10.7	20.892	7.9968	9928700	9928700	0	0	NaN	0	NaN	F5GY90;F5H226;F5H345;P08397-4;P08397-3;P08397-2;P08397	F5GY90;F5H226;F5H345;P08397-4;P08397-3;P08397-2;P08397	Porphobilinogen deaminase	HMBS
NaN	NaN	NaN	NaN	NaN	NaN			2	2	2	5.9	5.9	5.9	60.306	4.7436	38579000	20483000	18096000	0	NaN	0	NaN	F5H2U4;Q5T6F2-2;Q5T6F2	F5H2U4;Q5T6F2-2;Q5T6F2	Ubiquitin-associated protein 2	UBAP2
NaN	NaN	NaN	NaN	NaN	NaN			23	1	1	49.9	4.6	4.6	57.73	12.129	266940000	75376000	191570000	0	NaN	0	NaN	F5H5D3;Q9BQE3;F8VVB9;F8VRZ4;F8VS66;F8VWV9;F8VX09;A6NHL2-2;A6NHL2;F8VRK0;Q9H853	F5H5D3;Q9BQE3;F8VVB9	Tubulin alpha-1C chain	TUBA1C;TUBA1B
NaN	NaN	NaN	NaN	NaN	NaN			1	1	1	9	9	9	18.251	7.4132	14781000	9481000	5299700	0	NaN	0	NaN	F5H6B6;F5H8A0;Q86TN4-2;Q86TN4-3;Q86TN4;Q86TN4-4	F5H6B6;F5H8A0;Q86TN4-2;Q86TN4-3;Q86TN4;Q86TN4-4	tRNA 2-phosphotransferase 1	TRPT1
NaN	NaN	NaN	NaN	NaN	NaN			4	4	4	27.3	27.3	27.3	14.307	18.823	45704000	2102600	43602000	0	NaN	0	NaN	F5H6U7;Q9Y3E0;G3V1U5;F5GWD8;F5GXH6	F5H6U7;Q9Y3E0;G3V1U5	Vesicle transport protein GOT1B	GOLT1B
NaN	NaN	NaN	NaN	NaN	NaN			1	1	1	2.5	2.5	2.5	40.867	2.9721	34160000	20191000	13969000	0	NaN	0	NaN	F6SDV2;Q9GZM7-2;Q9GZM7-3;Q9GZM7	F6SDV2;Q9GZM7-2;Q9GZM7-3;Q9GZM7	Tubulointerstitial nephritis antigen-like	TINAGL1
NaN	NaN	NaN	NaN	NaN	NaN			2	2	2	23.9	23.9	23.9	12.27	5.3058	41263000	2958900	38304000	0	NaN	0	NaN	F6WST4;Q9P0S3;Q53FV1;J3KTF9;F8VXD5;J3QRM9;Q8N138-4;Q8N138	F6WST4;Q9P0S3;Q53FV1;J3KTF9;F8VXD5;J3QRM9;Q8N138-4;Q8N138	ORM1-like protein 1;ORM1-like protein 2;ORM1-like protein 3	ORMDL1;ORMDL2;ORMDL3
NaN	NaN	NaN	NaN	NaN	NaN			1	1	1	7.5	7.5	7.5	14.265	1.9261	36772000	2956100	33816000	0	NaN	0	NaN	F8VNT9;F8VV56;F8W022;F8VWK8;P08962-3;P08962-2;P08962	F8VNT9;F8VV56;F8W022;F8VWK8;P08962-3;P08962-2;P08962	Tetraspanin;CD63 antigen	CD63
NaN	NaN	NaN	NaN	NaN	NaN			1	1	1	19.4	19.4	19.4	17.279	13.32	21466000	21466000	0	0	NaN	0	NaN	H0YIN7;F8W0A3;F8VR77;Q9UQ80-2;Q9UQ80	H0YIN7;F8W0A3;F8VR77;Q9UQ80-2;Q9UQ80	Proliferation-associated protein 2G4	PA2G4
NaN	NaN	NaN	NaN	NaN	NaN			1	1	1	27.3	27.3	27.3	7.3953	4.1603	15792000	10391000	5400900	0	NaN	0	NaN	F8VZS5;F8VXP9;F8VRH4;F8VXB3;F8VS10;Q86XZ4	F8VZS5;F8VXP9;F8VRH4;F8VXB3;F8VS10;Q86XZ4	Spermatogenesis-associated serine-rich protein 2	SPATS2
NaN	NaN	NaN	NaN	NaN	NaN			3	3	3	19.1	19.1	19.1	17.499	42.517	176770000	176770000	0	0	NaN	0	NaN	F8VZG5;F8W1A4;P54819-4;P54819-6;P54819-3;P54819-2;P54819;F8VY04;G3V213;P54819-5	F8VZG5;F8W1A4;P54819-4;P54819-6;P54819-3;P54819-2;P54819;F8VY04	Adenylate kinase 2, mitochondrial;Adenylate kinase 2, mitochondrial;Adenylate kinase 2, mitochondrial, N-terminally processed	AK2
NaN	NaN	NaN	NaN	NaN	NaN			60	1	1	44.3	1.1	1.1	197.46	16.195	123870000	73186000	50680000	0	NaN	0	NaN	G3V1L9;Q07157;H0Y3R8;H0YKB1;H0YLT6	G3V1L9;Q07157	Tight junction protein ZO-1	TJP1
NaN	NaN	NaN	NaN	NaN	NaN			1	1	1	2.4	2.4	2.4	63.621	5.8676	71057000	41733000	29324000	0	NaN	0	NaN	G3V1N3;Q86XJ1	G3V1N3;Q86XJ1	GAS2-like protein 3	GAS2L3
NaN	NaN	NaN	NaN	NaN	NaN			16	1	1	51.5	10.2	10.2	33.57	12.308	29986000	20547000	9439100	0	NaN	0	NaN	G3V2Q1;P07910;G3V576;G3V555;G3V575	G3V2Q1;P07910;G3V576;G3V555;G3V575	Heterogeneous nuclear ribonucleoproteins C1/C2	HNRNPC
NaN	NaN	NaN	NaN	NaN	NaN			1	1	1	43.2	43.2	43.2	4.1437	7.0794	22056000	22056000	0	0	NaN	0	NaN	G3V3F8;G3V597;P07311-2;P07311	G3V3F8;G3V597;P07311-2;P07311	Acylphosphatase-1	ACYP1
NaN	NaN	NaN	NaN	NaN	NaN			2	2	2	26	26	26	17.512	28.17	30953000	30033000	920680	0	NaN	0	NaN	G3V4P8;P60983;G3V3X4	G3V4P8;P60983;G3V3X4	Glia maturation factor beta	GMFB
NaN	NaN	NaN	NaN	NaN	NaN			2	2	2	19.5	19.5	19.5	12.976	2.1545	4013400	177270	3836100	0	NaN	0	NaN	G3V5E4;G3V4W4;Q96EK6	G3V5E4;G3V4W4;Q96EK6	Glucosamine 6-phosphate N-acetyltransferase	GNPNAT1
NaN	NaN	NaN	NaN	NaN	NaN			1	1	1	1.5	1.5	1.5	83.924	2.7495	18966000	11045000	7920700	0	NaN	0	NaN	G3V533;Q6ZMZ3-2;Q6ZMZ3	G3V533;Q6ZMZ3-2;Q6ZMZ3	Nesprin-3	SYNE3
NaN	NaN	NaN	NaN	NaN	NaN			2	2	2	10.9	10.9	10.9	19.98	4.2539	62872000	0	62872000	0	NaN	0	NaN	G3XA94;Q9NPL8	G3XA94;Q9NPL8	Complex I assembly factor TIMMDC1, mitochondrial	TIMMDC1
NaN	NaN	NaN	NaN	NaN	NaN			1	1	1	10.6	10.6	10.6	28.858	11.572	9766900	6491500	3275400	0	NaN	0	NaN	G5E9R9;P10155-3;P10155-5;P10155-4;P10155	G5E9R9;P10155-3;P10155-5;P10155-4;P10155	60 kDa SS-A/Ro ribonucleoprotein	TROVE2
NaN	NaN	NaN	NaN	NaN	NaN			3	3	3	5.6	5.6	5.6	79.621	2.3514	18603000	1794500	16808000	0	NaN	0	NaN	G8JLD5;O00429-4;O00429-5;O00429-3;O00429-2;O00429;O00429-8;O00429-6;B4DPZ9;F8W1W3;F8VUJ9;F8VZ52;O00429-7	G8JLD5;O00429-4;O00429-5;O00429-3;O00429-2;O00429;O00429-8;O00429-6	Dynamin-1-like protein	DNM1L
NaN	NaN	NaN	NaN	NaN	NaN			2	2	2	13.5	13.5	13.5	31.143	5.5285	131070000	86680000	44389000	0	NaN	0	NaN	X6RDH7;H0Y4Y8;Q8N539	X6RDH7;H0Y4Y8;Q8N539	Fibrinogen C domain-containing protein 1	FIBCD1
NaN	NaN	NaN	NaN	NaN	NaN			3	1	1	9.8	3.1	3.1	43.212	2.7345	5535600	3410300	2125300	0	NaN	0	NaN	H0Y7R8	H0Y7R8		MLLT4
NaN	NaN	NaN	NaN	NaN	NaN			1	1	1	1	1	1	89.123	2.535	90791000	54866000	35924000	0	NaN	0	NaN	H0Y895;Q12774-2;Q12774	H0Y895;Q12774-2;Q12774	Rho guanine nucleotide exchange factor 5	ARHGEF5
NaN	NaN	NaN	NaN	NaN	NaN			1	1	1	7	7	7	25.868	2.8405	4824200	4824200	0	0	NaN	0	NaN	H0Y8X4;O43598	H0Y8X4;O43598	2-deoxynucleoside 5-phosphate N-hydrolase 1	DNPH1
NaN	NaN	NaN	NaN	NaN	NaN			4	4	4	13	13	13	43.074	4.5223	11407000	0	11407000	0	NaN	0	NaN	H0Y8Z9;Q9H845	H0Y8Z9;Q9H845	Acyl-CoA dehydrogenase family member 9, mitochondrial	ACAD9
NaN	NaN	NaN	NaN	NaN	NaN			1	1	1	7.6	7.6	7.6	22.278	2.3263	7196400	0	7196400	0	NaN	0	NaN	H0Y9B0;H0YA18;Q9NUQ7	H0Y9B0;H0YA18;Q9NUQ7	Ufm1-specific protease 2	UFSP2
NaN	NaN	NaN	NaN	NaN	NaN			1	1	1	11	11	11	10.398	1.8929	27062000	15692000	11370000	0	NaN	0	NaN	H0YBT3;H0YAV9;Q9UIV1-2;Q9UIV1	H0YBT3;H0YAV9;Q9UIV1-2;Q9UIV1	CCR4-NOT transcription complex subunit 7	CNOT7
NaN	NaN	NaN	NaN	NaN	NaN			1	1	1	15	15	15	13.715	27.923	113950000	113950000	0	0	NaN	0	NaN	H0YBX3;H0YB34;P52758	H0YBX3;H0YB34;P52758	Ribonuclease UK114	HRSP12
NaN	NaN	NaN	NaN	NaN	NaN			15	1	0	61	6.8	0	34.255	2.8956	29361000	19434000	9926800	0	NaN	0	NaN	H0YDQ3;U3KQE6	H0YDQ3		LMO7
NaN	NaN	NaN	NaN	NaN	NaN			2	2	2	15.1	15.1	15.1	19.742	5.1284	86274000	41432000	44842000	0	NaN	0	NaN	H0YGD6;H0YG47;Q96PU8-5;Q96PU8-9;Q96PU8-8;Q96PU8-6;Q96PU8-3;Q96PU8;F5GXS8;F5GYM3	H0YGD6;H0YG47;Q96PU8-5;Q96PU8-9;Q96PU8-8;Q96PU8-6;Q96PU8-3;Q96PU8;F5GXS8;F5GYM3	Protein quaking	QKI
NaN	NaN	NaN	NaN	NaN	NaN			1	1	1	8.2	8.2	8.2	23.945	1.9838	0	0	0	0	NaN	0	NaN	H0YG85;Q8NHQ8	H0YG85;Q8NHQ8	Ras association domain-containing protein 8	RASSF8
NaN	NaN	NaN	NaN	NaN	NaN			1	1	1	6.5	6.5	6.5	26.582	2.8713	3892700	2760900	1131800	0	NaN	0	NaN	H0YJ50;Q99986	H0YJ50;Q99986	Serine/threonine-protein kinase VRK1	VRK1
NaN	NaN	NaN	NaN	NaN	NaN			2	2	2	13.1	13.1	13.1	24.16	2.7436	11309000	8267800	3041400	0	NaN	0	NaN	H0YK49;H0YL12;H0YNX6;P13804-2;P13804;H0YKF0;H0YLU7	H0YK49;H0YL12;H0YNX6;P13804-2;P13804;H0YKF0;H0YLU7	Electron transfer flavoprotein subunit alpha, mitochondrial	ETFA
NaN	NaN	NaN	NaN	NaN	NaN			2	2	2	18.4	18.4	18.4	19.654	3.9537	18767000	11669000	7098600	0	NaN	0	NaN	H0YLC2;H0YKT8;H0YMA1;H0YMZ1;H0YN18;H0YL69;P25789;H0YMV3;H0YKS0;H0YLS6;H0YMI6;P25789-2	H0YLC2;H0YKT8;H0YMA1;H0YMZ1;H0YN18;H0YL69;P25789;H0YMV3;H0YKS0;H0YLS6;H0YMI6;P25789-2	Proteasome subunit alpha type;Proteasome subunit beta type;Proteasome subunit alpha type-4	PSMA4
NaN	NaN	NaN	NaN	NaN	NaN			3	3	3	9.6	9.6	9.6	35.33	4.7451	4568800	4568800	0	0	NaN	0	NaN	H0YL11;P48735-2;P48735	H0YL11;P48735-2;P48735	Isocitrate dehydrogenase [NADP], mitochondrial	IDH2
NaN	NaN	NaN	NaN	NaN	NaN			3	3	3	3.5	3.5	3.5	104.75	2.1782	121590000	70697000	50891000	0	NaN	0	NaN	H0YMD1;H0YM92;J3KMZ9;P01130-2;P01130-3;P01130-6;P01130-4;P01130-5;P01130	H0YMD1;H0YM92;J3KMZ9;P01130-2;P01130-3;P01130-6;P01130-4;P01130-5;P01130	Low-density lipoprotein receptor	LDLR
NaN	NaN	NaN	NaN	NaN	NaN			2	2	2	3.3	3.3	3.3	101.49	2.1723	24528000	9810900	14717000	0	NaN	0	NaN	H0YN14;Q8TEX9;Q8TEX9-2	H0YN14;Q8TEX9;Q8TEX9-2	Importin-4	IPO4
NaN	NaN	NaN	NaN	NaN	NaN			1	1	1	43	43	43	9.1874	27.444	22293000	22293000	0	0	NaN	0	NaN	H7BZ09;H0YN26;P39687	H7BZ09;H0YN26;P39687	Acidic leucine-rich nuclear phosphoprotein 32 family member A	ANP32A
NaN	NaN	NaN	NaN	NaN	NaN			2	2	2	14.2	14.2	14.2	17.668	1.8275	23992000	16789000	7202400	0	NaN	0	NaN	H3BMH2;H3BSC1;P62491-2;Q15907-2;P62491;Q15907	H3BMH2;H3BSC1;P62491-2;Q15907-2;P62491;Q15907	Ras-related protein Rab-11A;Ras-related protein Rab-11B	RAB11A;RAB11B
NaN	NaN	NaN	NaN	NaN	NaN			1	1	1	11.7	11.7	11.7	15.108	3.9241	83361000	23359000	60002000	0	NaN	0	NaN	H3BPG5;H3BV80;H3BMS0;H3BMM9;H3BTC0;Q15287-3;Q15287-2;Q15287	H3BPG5;H3BV80;H3BMS0;H3BMM9;H3BTC0;Q15287-3;Q15287-2;Q15287	RNA-binding protein with serine-rich domain 1	RNPS1
NaN	NaN	NaN	NaN	NaN	NaN			2	2	2	7.9	7.9	7.9	15.522	2.1125	165950000	29996000	135960000	0	NaN	0	NaN	H3BMW4;Q9BTX3-2;Q9BTX3	H3BMW4;Q9BTX3-2;Q9BTX3	Transmembrane protein 208	TMEM208
NaN	NaN	NaN	NaN	NaN	NaN			7	2	2	27.4	7.6	7.6	27.168	5.2598	204860000	5786100	199080000	0	NaN	0	NaN	H3BN98;H3BPJ2;Q15041-2;Q15041;Q15041-3	H3BN98
NaN	NaN	NaN	NaN	NaN	NaN			1	1	1	15.7	15.7	15.7	8.1425	2.5514	8746900	1501300	7245600	0	NaN	0	NaN	H3BNH5;H3BQI7;H3BT52;Q3SXM5-2;Q3SXM5	H3BNH5;H3BQI7;H3BT52;Q3SXM5-2;Q3SXM5	Inactive hydroxysteroid dehydrogenase-like protein 1	HSDL1
NaN	NaN	NaN	NaN	NaN	NaN			1	1	1	13.6	13.6	13.6	20.064	4.6483	8111700	8111700	0	0	NaN	0	NaN	H3BNT7;H3BTM8;P51665	H3BNT7;H3BTM8;P51665	26S proteasome non-ATPase regulatory subunit 7	PSMD7
NaN	NaN	NaN	NaN	NaN	NaN			1	1	1	32.1	32.1	32.1	12.119	21.989	27523000	27523000	0	0	NaN	0	NaN	H3BSW7;H3BUY4;H3BPY5;H3BNU9;Q9Y2V2	H3BSW7;H3BUY4;H3BPY5;H3BNU9;Q9Y2V2	Calcium-regulated heat stable protein 1	CARHSP1
NaN	NaN	NaN	NaN	NaN	NaN			17	1	1	27.1	6.3	6.3	53.496	36.095	59117000	38574000	20543000	0	NaN	0	NaN	H3BPE7	H3BPE7		FUS
NaN	NaN	NaN	NaN	NaN	NaN			1	1	1	9.8	9.8	9.8	17.482	4.9352	16930000	5420500	11510000	0	NaN	0	NaN	H3BV16;H3BPJ9;O96000-2;O96000	H3BV16;H3BPJ9;O96000-2;O96000	NADH dehydrogenase [ubiquinone] 1 beta subcomplex subunit 10	NDUFB10
NaN	NaN	NaN	NaN	NaN	NaN			1	1	1	21.9	21.9	21.9	17.272	27.614	78565000	78565000	0	0	NaN	0	NaN	H3BQW8;H3BPQ4;Q16775-2	H3BQW8;H3BPQ4;Q16775-2		HAGH
NaN	NaN	NaN	NaN	NaN	NaN			1	1	1	15.3	15.3	15.3	9.2834	1.837	946970	0	946970	0	NaN	0	NaN	H3BPR2;Q13232	H3BPR2;Q13232	Nucleoside diphosphate kinase;Nucleoside diphosphate kinase 3	NME3
NaN	NaN	NaN	NaN	NaN	NaN			1	1	1	16.3	16.3	16.3	9.7342	2.6374	2131800	1551900	579970	0	NaN	0	NaN	V9GYM1;J3KSZ6;H3BTA7;H3BR06;Q15554-4;Q15554	V9GYM1;J3KSZ6;H3BTA7;H3BR06;Q15554-4;Q15554	Telomeric repeat-binding factor 2	TERF2
NaN	NaN	NaN	NaN	NaN	NaN			1	1	1	3.6	3.6	3.6	52.735	1.9837	51941000	29202000	22739000	0	NaN	0	NaN	H3BR51;Q3KRB8;Q6P4F7-2;Q6P4F7	H3BR51;Q3KRB8;Q6P4F7-2;Q6P4F7	Rho GTPase-activating protein 11B;Rho GTPase-activating protein 11A	ARHGAP11A;ARHGAP11B
NaN	NaN	NaN	NaN	NaN	NaN			2	2	2	21.6	21.6	21.6	23.717	1.8529	17431000	13295000	4135500	0	NaN	0	NaN	H3BRL9;P78549-3;P78549-2;P78549;H3BPD5	H3BRL9;P78549-3;P78549-2;P78549;H3BPD5	Endonuclease III-like protein 1	NTHL1
NaN	NaN	NaN	NaN	NaN	NaN			2	2	2	11.5	11.5	11.5	22.993	2.6529	37209000	26734000	10475000	0	NaN	0	NaN	H3BVD2;H3BUJ5;H3BT57;P29590-4;P29590-12;P29590-2;P29590-5;P29590-9;P29590-13;P29590-3;P29590-8;P29590-11;P29590;H3BRN3;H3BT29;P29590-14;P29590-10	H3BVD2;H3BUJ5;H3BT57;P29590-4;P29590-12;P29590-2;P29590-5;P29590-9;P29590-13;P29590-3;P29590-8;P29590-11;P29590;H3BRN3;H3BT29;P29590-14;P29590-10	Protein PML	PML
NaN	NaN	NaN	NaN	NaN	NaN			1	1	1	3	3	3	56.825	7.3844	10286000	4531200	5754800	0	NaN	0	NaN	H3BTB7;Q5JPH6;Q5JPH6-2	H3BTB7;Q5JPH6;Q5JPH6-2	Probable glutamate--tRNA ligase, mitochondrial	EARS2
NaN	NaN	NaN	NaN	NaN	NaN			1	1	1	13.6	13.6	13.6	7.5737	2.8199	21254000	13550000	7703900	0	NaN	0	NaN	H3BUR4;Q9ULX3	H3BUR4;Q9ULX3	RNA-binding protein NOB1	NOB1
NaN	NaN	NaN	NaN	NaN	NaN			2	2	2	37.9	37.9	37.9	15.716	16.149	90883000	3571900	87311000	0	NaN	0	NaN	H3BUX2;J3KNF8;O43169;D6RFH4	H3BUX2;J3KNF8;O43169;D6RFH4	Cytochrome b5 type B	CYB5B
NaN	NaN	NaN	NaN	NaN	NaN			5	2	2	43.9	18.4	18.4	11.658	16.123	396960000	0	396960000	0	NaN	0	NaN	H6UMI1;O95166;I3L3J4	H6UMI1;O95166	Gamma-aminobutyric acid receptor-associated protein	GABARAP
NaN	NaN	NaN	NaN	NaN	NaN			1	1	1	5.3	5.3	5.3	25.211	1.7613	851920	441840	410080	0	NaN	0	NaN	H7C0H8;H7C085;Q6NUQ4-2;Q6NUQ4	H7C0H8;H7C085;Q6NUQ4-2;Q6NUQ4	Transmembrane protein 214	TMEM214
NaN	NaN	NaN	NaN	NaN	NaN			1	1	1	5.4	5.4	5.4	23.413	2.0389	340510000	161680000	178830000	0	NaN	0	NaN	H7C0Q6;Q9C037-3;Q9C037-2;Q9C037	H7C0Q6;Q9C037-3;Q9C037-2;Q9C037	E3 ubiquitin-protein ligase TRIM4	TRIM4
NaN	NaN	NaN	NaN	NaN	NaN			2	2	2	6.8	6.8	6.8	36.898	7.8087	46063000	7767900	38295000	0	NaN	0	NaN	H7C0X4;Q92685;F8WF93;H7BZZ2;F8WE30;C9J7S5;Q92685-2	H7C0X4;Q92685;F8WF93;H7BZZ2;F8WE30;C9J7S5;Q92685-2	Dol-P-Man:Man(5)GlcNAc(2)-PP-Dol alpha-1,3-mannosyltransferase	ALG3
NaN	NaN	NaN	NaN	NaN	NaN			1	1	1	17.2	17.2	17.2	13.529	6.4701	57640000	42415000	15225000	0	NaN	0	NaN	H7C170;O43709;O43709-3	H7C170;O43709;O43709-3	Probable 18S rRNA (guanine-N(7))-methyltransferase	WBSCR22
NaN	NaN	NaN	NaN	NaN	NaN			1	1	1	8.4	8.4	8.4	22.065	2.5546	3240600	335030	2905500	0	NaN	0	NaN	H7C1E4;P61966	H7C1E4;P61966	AP-1 complex subunit sigma-1A	AP1S1
NaN	NaN	NaN	NaN	NaN	NaN			1	1	1	3.7	3.7	3.7	26.759	1.9349	7274600	2664300	4610300	0	NaN	0	NaN	H7C1G6;Q7Z3C6-2;Q7Z3C6	H7C1G6;Q7Z3C6-2;Q7Z3C6	Autophagy-related protein 9A	ATG9A
NaN	NaN	NaN	NaN	NaN	NaN			3	3	3	15.3	15.3	15.3	27.774	9.274	17795000	14436000	3359500	0	NaN	0	NaN	H7C469;P07339;F8WD96;C9JH19;H7C1V0;F8W787	H7C469;P07339;F8WD96;C9JH19	Cathepsin D;Cathepsin D light chain;Cathepsin D heavy chain	CTSD
NaN	NaN	NaN	NaN	NaN	NaN			1	1	1	5.8	5.8	5.8	30.001	2.5966	4681200	783590	3897600	0	NaN	0	NaN	H7C4G8;Q9H857-4;Q9H857;Q9H857-3;Q9H857-2	H7C4G8;Q9H857-4;Q9H857;Q9H857-3;Q9H857-2	5-nucleotidase domain-containing protein 2	NT5DC2
NaN	NaN	NaN	NaN	NaN	NaN			1	1	1	4.9	4.9	4.9	29.503	2.548	24433000	17267000	7166400	0	NaN	0	NaN	H7C4M4;Q9ULI3	H7C4M4;Q9ULI3	Protein HEG homolog 1	HEG1
NaN	NaN	NaN	NaN	NaN	NaN			2	2	2	32	32	32	8.3713	3.3088	88861000	86568000	2293000	0	NaN	0	NaN	I3L0K2;I3L3M7;Q9BRA2;I3L2R6	I3L0K2;I3L3M7;Q9BRA2;I3L2R6	Thioredoxin domain-containing protein 17	TXNDC17
NaN	NaN	NaN	NaN	NaN	NaN			1	1	1	6.2	6.2	6.2	33.524	4.0507	14124000	7184900	6938900	0	NaN	0	NaN	I3L0U5;Q6PK04	I3L0U5;Q6PK04	Coiled-coil domain-containing protein 137	CCDC137
NaN	NaN	NaN	NaN	NaN	NaN			1	1	1	25	25	25	8.6762	2.1035	0	0	0	0	NaN	0	NaN	I3L1J9;Q9NP84-2;Q9NP84	I3L1J9;Q9NP84-2;Q9NP84	Tumor necrosis factor receptor superfamily member 12A	TNFRSF12A
NaN	NaN	NaN	NaN	NaN	NaN			3	3	3	3.7	3.7	3.7	117.7	26.093	47912000	32150000	15761000	0	NaN	0	NaN	I3L2J8;Q9UPN4-3;Q9UPN4-2;Q9UPN4;I3L316;I3L4M5;I3L2X7	I3L2J8;Q9UPN4-3;Q9UPN4-2;Q9UPN4;I3L316;I3L4M5;I3L2X7	Centrosomal protein of 131 kDa	CEP131
NaN	NaN	NaN	NaN	NaN	NaN			2	2	2	10.6	10.6	10.6	35.698	4.3471	11583000	7532300	4051000	0	NaN	0	NaN	I3L323;Q8IWR0;I3L282;I3L2K5	I3L323;Q8IWR0;I3L282;I3L2K5	Zinc finger CCCH domain-containing protein 7A	ZC3H7A
NaN	NaN	NaN	NaN	NaN	NaN			1	1	1	9.6	9.6	9.6	19.584	10.161	41363000	23187000	18176000	0	NaN	0	NaN	I3L443;Q9HC36	I3L443;Q9HC36	rRNA methyltransferase 3, mitochondrial	RNMTL1
NaN	NaN	NaN	NaN	NaN	NaN			1	1	1	1	1	1	130.66	3.1502	2177600	1433500	744120	0	NaN	0	NaN	I3VM54;Q9Y2K7-4;Q9Y2K7-5;Q9Y2K7-2;Q9Y2K7	I3VM54;Q9Y2K7-4;Q9Y2K7-5;Q9Y2K7-2;Q9Y2K7	Lysine-specific demethylase 2A	KDM2A
NaN	NaN	NaN	NaN	NaN	NaN			2	2	2	6.2	6.2	6.2	45.78	9.5243	45194000	27077000	18117000	0	NaN	0	NaN	J3KMZ8;Q92785-2;Q92785;E9PN04	J3KMZ8;Q92785-2;Q92785;E9PN04	Zinc finger protein ubi-d4	DPF2
NaN	NaN	NaN	NaN	NaN	NaN			31	1	0	68.4	4.6	0	33.222	4.9897	1077700000	687350000	390390000	0	NaN	0	NaN	J3KN67	J3KN67		TPM3
NaN	NaN	NaN	NaN	NaN	NaN			2	2	2	2.7	2.7	2.7	83.359	2.8333	15496000	4570700	10926000	0	NaN	0	NaN	J3KPM9;P42224-2;P42224;E7ENM1;E7EPD2;D2KFR9	J3KPM9;P42224-2;P42224;E7ENM1;E7EPD2;D2KFR9	Signal transducer and activator of transcription;Signal transducer and activator of transcription 1-alpha/beta	STAT1
NaN	NaN	NaN	NaN	NaN	NaN			2	2	2	3.5	3.5	3.5	78.948	4.334	1722800	1531000	191860	0	NaN	0	NaN	J3KR72;P49848;P49848-3;E5RKA5;C9JIS2;E5RHA1;C9J088;C9JFL8;C9JTY6;P49848-2	J3KR72;P49848;P49848-3;E5RKA5;C9JIS2;E5RHA1;C9J088;C9JFL8;C9JTY6;P49848-2	Transcription initiation factor TFIID subunit 6	TAF6
NaN	NaN	NaN	NaN	NaN	NaN			2	2	2	37.1	37.1	37.1	7.7629	2.2806	53458000	26243000	27216000	0	NaN	0	NaN	J3KRJ2;J3KRF8;J3QR41;J3KTD6;J3QLN8;Q96GD4-3;Q96GD4-4;Q96GD4-2;Q96GD4;Q96GD4-5	J3KRJ2;J3KRF8;J3QR41;J3KTD6;J3QLN8;Q96GD4-3;Q96GD4-4;Q96GD4-2;Q96GD4;Q96GD4-5	Aurora kinase B	AURKB
NaN	NaN	NaN	NaN	NaN	NaN			1	1	1	14.9	14.9	14.9	7.3103	2.1012	29626000	3142500	26484000	0	NaN	0	NaN	J3KSB1;J3KSI7;J3QL84;J3KS44;J3QLV3;J3KRY6;Q9HC21-2;Q9HC21	J3KSB1;J3KSI7;J3QL84;J3KS44;J3QLV3;J3KRY6;Q9HC21-2;Q9HC21	Mitochondrial thiamine pyrophosphate carrier	SLC25A19
NaN	NaN	NaN	NaN	NaN	NaN			2	2	2	2.4	2.4	2.4	85.586	2.276	46345000	31214000	15131000	0	NaN	0	NaN	J3QR07;Q96MU7-2;Q96MU7	J3QR07;Q96MU7-2;Q96MU7	YTH domain-containing protein 1	YTHDC1
NaN	NaN	NaN	NaN	NaN	NaN			1	1	1	5.7	5.7	5.7	15.303	1.9402	59940000	14213000	45727000	0	NaN	0	NaN	J3QTB2;J3QTA6;Q9BRQ6	J3QTB2;J3QTA6;Q9BRQ6	MICOS complex subunit MIC25	CHCHD6
NaN	NaN	NaN	NaN	NaN	NaN			1	1	1	14.9	14.9	14.9	7.9711	2.0702	24450000	7886200	16564000	0	NaN	0	NaN	K7ERW6;K7EJC1;K7EJR3;R4GMR5;P48556	K7ERW6;K7EJC1;K7EJR3;R4GMR5;P48556	26S proteasome non-ATPase regulatory subunit 8	PSMD8
NaN	NaN	NaN	NaN	NaN	NaN			1	1	1	27.3	27.3	27.3	13.607	13.102	23329000	23329000	0	0	NaN	0	NaN	K7EM18;P41567	K7EM18;P41567	Eukaryotic translation initiation factor 1	EIF1
NaN	NaN	NaN	NaN	NaN	NaN			1	1	1	6.2	6.2	6.2	14.609	2.1301	314280	314280	0	0	NaN	0	NaN	K7EMQ6;K7EPK2;K7EQ35;O43776	K7EMQ6;K7EPK2;K7EQ35;O43776	Asparagine--tRNA ligase, cytoplasmic	NARS
NaN	NaN	NaN	NaN	NaN	NaN			4	4	4	32.5	32.5	32.5	17.002	277.52	817630000	750040000	67596000	0	NaN	0	NaN	K7EN27;Q99497;K7ELW0	K7EN27;Q99497;K7ELW0	Protein deglycase DJ-1	PARK7
NaN	NaN	NaN	NaN	NaN	NaN			1	1	1	12.9	12.9	12.9	10.888	1.8279	0	0	0	0	NaN	0	NaN	Q5JY01;Q5JY02;K7ENP1;Q7Z4G4-3;Q7Z4G4-2;Q7Z4G4	Q5JY01;Q5JY02;K7ENP1;Q7Z4G4-3;Q7Z4G4-2;Q7Z4G4	tRNA (guanine(10)-N2)-methyltransferase homolog	TRMT11
NaN	NaN	NaN	NaN	NaN	NaN			2	2	2	34.7	34.7	34.7	13.212	13.821	97306000	69170000	28136000	0	NaN	0	NaN	K7EP16;O75821;K7ENA8	K7EP16;O75821;K7ENA8	Eukaryotic translation initiation factor 3 subunit G	EIF3G
NaN	NaN	NaN	NaN	NaN	NaN			1	1	1	14.4	14.4	14.4	14.164	3.3494	13481000	2058000	11423000	0	NaN	0	NaN	K7EQB1;Q9UNK0	K7EQB1;Q9UNK0	Syntaxin-8	STX8
NaN	NaN	NaN	NaN	NaN	NaN			1	1	1	9.1	9.1	9.1	13.98	3.2382	90618000	42406000	48211000	0	NaN	0	NaN	K7EQG1;Q9NXS2-3;Q9NXS2	K7EQG1;Q9NXS2-3;Q9NXS2	Glutaminyl-peptide cyclotransferase-like protein	QPCTL
NaN	NaN	NaN	NaN	NaN	NaN			3	1	1	61	27.1	27.1	6.8126	2.1964	0	0	0	0	NaN	0	NaN	K7EQW8	K7EQW8		TPM4
NaN	NaN	NaN	NaN	NaN	NaN			1	1	1	17.8	17.8	17.8	15.059	6.175	3436600	3209700	226900	0	NaN	0	NaN	K7ERT7;Q99536	K7ERT7;Q99536	Synaptic vesicle membrane protein VAT-1 homolog	VAT1
NaN	NaN	NaN	NaN	NaN	NaN			2	2	2	7.3	7.3	7.3	51.814	2.0871	1442400	38088	1404300	0	NaN	0	NaN	K7ESN3;Q8N2G8-2;Q8N2G8-3;Q8N2G8	K7ESN3;Q8N2G8-2;Q8N2G8-3;Q8N2G8	GH3 domain-containing protein	GHDC
NaN	NaN	NaN	NaN	NaN	NaN			1	1	1	16.7	16.7	16.7	8.9121	2.073	0	0	0	0	NaN	0	NaN	M0QX27;M0R2E9;M0R0H5;M0QYR6;M0R1I2;Q03405-2;Q03405-3;Q03405	M0QX27;M0R2E9;M0R0H5;M0QYR6;M0R1I2;Q03405-2;Q03405-3;Q03405	Urokinase plasminogen activator surface receptor	PLAUR
NaN	NaN	NaN	NaN	NaN	NaN			1	1	1	12.7	12.7	12.7	7.1382	2.2033	52379000	7791400	44588000	0	NaN	0	NaN	M0R122;M0QZ66;M0QXN1;P54852	M0R122;M0QZ66;M0QXN1;P54852	Epithelial membrane protein 3	EMP3
NaN	NaN	NaN	NaN	NaN	NaN			1	1	1	9.7	9.7	9.7	15.67	6.1072	56865000	56865000	0	0	NaN	0	NaN	M0QZL1;M0R192;P30043	M0QZL1;M0R192;P30043	Flavin reductase (NADPH)	BLVRB
NaN	NaN	NaN	NaN	NaN	NaN			28	1	1	79.1	3.7	3.7	39.933	2.6203	21154000	14677000	6476800	0	NaN	0	NaN	M0QZM1	M0QZM1		HNRNPM
NaN	NaN	NaN	NaN	NaN	NaN			1	1	1	15.6	15.6	15.6	18.912	6.6442	73774000	73774000	0	0	NaN	0	NaN	M0R0U3;M0R261;O95336	M0R0U3;M0R261;O95336	6-phosphogluconolactonase	PGLS
NaN	NaN	NaN	NaN	NaN	NaN			1	1	1	1.8	1.8	1.8	69.23	2.2282	11226000	789830	10436000	0	NaN	0	NaN	M0R0W6;P30530-2;P30530	M0R0W6;P30530-2;P30530	Receptor protein-tyrosine kinase;Tyrosine-protein kinase receptor UFO	AXL
NaN	NaN	NaN	NaN	NaN	NaN			2	2	2	19.2	19.2	19.2	17.056	2.7763	3656600	0	3656600	0	NaN	0	NaN	M0R3D4;Q9UI14;M0QXH1;M0R1H9	M0R3D4;Q9UI14;M0QXH1;M0R1H9	Prenylated Rab acceptor protein 1	RABAC1
NaN	NaN	NaN	NaN	NaN	NaN			3	3	3	9	9	9	47.463	20.927	75979000	34243000	41736000	0	NaN	0	NaN	O00231;O00231-2;J3QRY4	O00231;O00231-2;J3QRY4	26S proteasome non-ATPase regulatory subunit 11	PSMD11
NaN	NaN	NaN	NaN	NaN	NaN			1	1	1	2.2	2.2	2.2	120.5	6.3683	15467000	15467000	0	0	NaN	0	NaN	O00267-2;O00267	O00267-2;O00267	Transcription elongation factor SPT5	SUPT5H
NaN	NaN	NaN	NaN	NaN	NaN			2	2	2	18.7	18.7	18.7	26.922	10.668	13752000	13752000	0	0	NaN	0	NaN	O00299	O00299	Chloride intracellular channel protein 1	CLIC1
NaN	NaN	NaN	NaN	NaN	NaN			4	4	4	6.8	6.8	6.8	86.307	6.7579	2716500	219850	2496700	0	NaN	0	NaN	O00308-2;O00308;O00308-4;O00308-3	O00308-2;O00308;O00308-4;O00308-3	NEDD4-like E3 ubiquitin-protein ligase WWP2	WWP2
NaN	NaN	NaN	NaN	NaN	NaN			1	1	1	1.1	1.1	1.1	138.62	1.7723	13295000	11299000	1995900	0	NaN	0	NaN	O00411	O00411	DNA-directed RNA polymerase, mitochondrial	POLRMT
NaN	NaN	NaN	NaN	NaN	NaN			1	1	1	12.8	12.8	12.8	32.113	11.391	20319000	15889000	4430200	0	NaN	0	NaN	O00625	O00625	Pirin	PIR
NaN	NaN	NaN	NaN	NaN	NaN			2	2	2	20.8	20.8	20.8	16.46	14.053	177810000	177810000	0	0	NaN	0	NaN	P47813;O14602;X6RAC9;A6NJH9	P47813;O14602;X6RAC9;A6NJH9	Eukaryotic translation initiation factor 1A, X-chromosomal;Eukaryotic translation initiation factor 1A, Y-chromosomal	EIF1AX;EIF1AY
NaN	NaN	NaN	NaN	NaN	NaN			2	2	2	11.2	11.2	11.2	35.201	3.0689	19029000	422500	18606000	0	NaN	0	NaN	O14828-2;O14828	O14828-2;O14828	Secretory carrier-associated membrane protein 3	SCAMP3
NaN	NaN	NaN	NaN	NaN	NaN			2	2	2	16.3	16.3	16.3	18.416	4.6106	6733100	2727800	4005400	0	NaN	0	NaN	Q5VV89;O14880;Q5VV87	Q5VV89;O14880;Q5VV87	Microsomal glutathione S-transferase 3	MGST3
NaN	NaN	NaN	NaN	NaN	NaN			1	1	1	1.8	1.8	1.8	56.486	2.4065	16822000	4415200	12406000	0	NaN	0	NaN	O15091-4;O15091-2;O15091	O15091-4;O15091-2;O15091	Mitochondrial ribonuclease P protein 3	KIAA0391
NaN	NaN	NaN	NaN	NaN	NaN			3	3	3	13.7	13.7	13.7	36.648	25.494	397590000	20345000	377240000	0	NaN	0	NaN	O15127;H3BV04;H3BN93;H3BUB6;H3BPL9	O15127	Secretory carrier-associated membrane protein 2	SCAMP2
NaN	NaN	NaN	NaN	NaN	NaN			33	1	1	60.4	2.2	2.2	73.525	9.8445	262510000	161630000	100870000	0	NaN	0	NaN	O15231;O15231-4;O15231-7;O15231-6;O15231-8;O15231-5;H7BZT5;H7C1R1	O15231;O15231-4;O15231-7;O15231-6;O15231-8;O15231-5;H7BZT5	Zinc finger protein 185	ZNF185
NaN	NaN	NaN	NaN	NaN	NaN			1	1	1	3	3	3	52.743	5.057	3507100	0	3507100	0	NaN	0	NaN	O15269	O15269	Serine palmitoyltransferase 1	SPTLC1
NaN	NaN	NaN	NaN	NaN	NaN			2	2	2	15.9	15.9	15.9	18.58	58.736	101800000	96825000	4976700	0	NaN	0	NaN	O15498-2;O15498	O15498-2;O15498	Synaptobrevin homolog YKT6	YKT6
NaN	NaN	NaN	NaN	NaN	NaN			1	1	1	6.7	6.7	6.7	19.312	2.3482	26705000	18025000	8679500	0	NaN	0	NaN	O15504-3;O15504	O15504-3;O15504	Nucleoporin-like protein 2	NUPL2
NaN	NaN	NaN	NaN	NaN	NaN			2	2	2	5.8	5.8	5.8	58.32	10.615	105580000	66729000	38847000	0	NaN	0	NaN	O43172-2;O43172	O43172-2;O43172	U4/U6 small nuclear ribonucleoprotein Prp4	PRPF4
NaN	NaN	NaN	NaN	NaN	NaN			2	2	2	6.9	6.9	6.9	56.289	17.474	133410000	81712000	51693000	0	NaN	0	NaN	O43660-2;O43660	O43660-2;O43660	Pleiotropic regulator 1	PLRG1
NaN	NaN	NaN	NaN	NaN	NaN			1	1	1	1.3	1.3	1.3	171.29	2.6738	6577300	5097200	1480100	0	NaN	0	NaN	O60306	O60306	Intron-binding protein aquarius	AQR
NaN	NaN	NaN	NaN	NaN	NaN			1	1	1	29.2	29.2	29.2	12.823	13.002	10903000	10903000	0	0	NaN	0	NaN	O60739	O60739	Eukaryotic translation initiation factor 1b	EIF1B
NaN	NaN	NaN	NaN	NaN	NaN			1	1	1	8.6	8.6	8.6	15.48	7.1955	20070000	18915000	1155600	0	NaN	0	NaN	O60869-2;O60869-3;O60869	O60869-2;O60869-3;O60869	Endothelial differentiation-related factor 1	EDF1
NaN	NaN	NaN	NaN	NaN	NaN			2	2	2	3.1	3.1	3.1	105.93	12.25	14201000	12980000	1221400	0	NaN	0	NaN	O75400-2;O75400;H7C2N3;F5H578;O75400-3	O75400-2;O75400;H7C2N3;F5H578;O75400-3	Pre-mRNA-processing factor 40 homolog A	PRPF40A
NaN	NaN	NaN	NaN	NaN	NaN			2	2	2	6.6	6.6	6.6	60.103	6.1043	6619600	6531700	87872	0	NaN	0	NaN	O75475;O75475-3;O75475-2	O75475;O75475-3;O75475-2	PC4 and SFRS1-interacting protein	PSIP1
NaN	NaN	NaN	NaN	NaN	NaN			3	1	1	8.2	3.1	3.1	54.91	7.3014	207260000	153510000	53742000	0	NaN	0	NaN	O75487-2;O75487;A0A087WT82	O75487-2;O75487	Glypican-4;Secreted glypican-4	GPC4
NaN	NaN	NaN	NaN	NaN	NaN			4	4	4	4.8	4.8	4.8	87.116	8.0242	137120000	2092800	135030000	0	NaN	0	NaN	O75843;H0YJ08;G3V532	O75843;H0YJ08	AP-1 complex subunit gamma-like 2	AP1G2
NaN	NaN	NaN	NaN	NaN	NaN			2	2	2	9.7	9.7	9.7	46.659	2.8105	512790000	24542000	488240000	0	NaN	0	NaN	O75874;C9JJE5;C9JLU6;C9J4N6	O75874;C9JJE5;C9JLU6;C9J4N6	Isocitrate dehydrogenase [NADP] cytoplasmic	IDH1
NaN	NaN	NaN	NaN	NaN	NaN			1	1	1	10.7	10.7	10.7	29.841	10.803	3010600	3010600	0	0	NaN	0	NaN	O75937	O75937	DnaJ homolog subfamily C member 8	DNAJC8
NaN	NaN	NaN	NaN	NaN	NaN			1	1	1	4.2	4.2	4.2	26.711	2.7753	25620000	17538000	8081700	0	NaN	0	NaN	O75940	O75940	Survival of motor neuron-related-splicing factor 30	SMNDC1
NaN	NaN	NaN	NaN	NaN	NaN			1	1	1	7.5	7.5	7.5	37.432	3.4544	6232600	6232600	0	0	NaN	0	NaN	O76003	O76003	Glutaredoxin-3	GLRX3
NaN	NaN	NaN	NaN	NaN	NaN			9	1	1	12.7	1.9	1.9	103.96	13.329	9606600	6695200	2911400	0	NaN	0	NaN	O94973;O94973-2;A0A0G2JS82	O94973;O94973-2;A0A0G2JS82	AP-2 complex subunit alpha-2	AP2A2
NaN	NaN	NaN	NaN	NaN	NaN			1	1	1	8.3	8.3	8.3	14.026	2.7087	11287000	3549700	7736900	0	NaN	0	NaN	O95168-2;O95168	O95168-2;O95168	NADH dehydrogenase [ubiquinone] 1 beta subcomplex subunit 4	NDUFB4
NaN	NaN	NaN	NaN	NaN	NaN			1	1	1	28.6	28.6	28.6	9.7331	39.011	10750000	10750000	0	0	NaN	0	NaN	Q5QPN5;Q5QPN9;Q5QPQ3;Q5QPQ2;O95372	Q5QPN5;Q5QPN9;Q5QPQ3;Q5QPQ2;O95372	Acyl-protein thioesterase 2	LYPLA2
NaN	NaN	NaN	NaN	NaN	NaN			1	1	1	7.3	7.3	7.3	37.646	6.1961	17719000	12388000	5331500	0	NaN	0	NaN	O95400	O95400	CD2 antigen cytoplasmic tail-binding protein 2	CD2BP2
NaN	NaN	NaN	NaN	NaN	NaN			1	1	1	2.1	2.1	2.1	66.009	2.9397	10265000	6009000	4255900	0	NaN	0	NaN	O95486-2;O95486	O95486-2;O95486	Protein transport protein Sec24A	SEC24A
NaN	NaN	NaN	NaN	NaN	NaN			1	1	1	1.1	1.1	1.1	133.63	1.9494	1690700	862750	827980	0	NaN	0	NaN	O95487-2;O95487;O95487-3	O95487-2;O95487;O95487-3	Protein transport protein Sec24B	SEC24B
NaN	NaN	NaN	NaN	NaN	NaN			2	2	2	3.8	3.8	3.8	80.419	5.9625	45255000	4369300	40885000	0	NaN	0	NaN	O95573;O60488-2;O60488	O95573;O60488-2;O60488	Long-chain-fatty-acid--CoA ligase 3;Long-chain-fatty-acid--CoA ligase 4	ACSL3;ACSL4
NaN	NaN	NaN	NaN	NaN	NaN			1	1	1	5.4	5.4	5.4	29.95	1.9607	0	0	0	0	NaN	0	NaN	P00414	P00414	Cytochrome c oxidase subunit 3	MT-CO3
NaN	NaN	NaN	NaN	NaN	NaN			2	2	2	13.5	13.5	13.5	29.246	12.698	180870000	180870000	0	0	NaN	0	NaN	P00918;E5RID5;E5RK37	P00918;E5RID5;E5RK37	Carbonic anhydrase 2	CA2
NaN	NaN	NaN	NaN	NaN	NaN			2	1	1	22.2	16.2	16.2	12.582	1.8663	23769000	22211000	1558100	0	NaN	0	NaN	P01764	P01764	Ig heavy chain V-III region 23	IGHV3-23
NaN	NaN	NaN	NaN	NaN	NaN			1	1	1	13	13	13	13.186	1.896	7099500	0	7099500	0	NaN	0	NaN	P03897	P03897	NADH-ubiquinone oxidoreductase chain 3	MT-ND3
NaN	NaN	NaN	NaN	NaN	NaN			1	1	1	1.7	1.7	1.7	92.02	3.7231	7288500	623430	6665100	0	NaN	0	NaN	P04035-2;P04035;P04035-3	P04035-2;P04035;P04035-3	3-hydroxy-3-methylglutaryl-coenzyme A reductase	HMGCR
NaN	NaN	NaN	NaN	NaN	NaN			1	1	1	2.5	2.5	2.5	59.755	2.8386	3394600	3394600	0	0	NaN	0	NaN	P04040	P04040	Catalase	CAT
NaN	NaN	NaN	NaN	NaN	NaN			2	2	2	8.7	8.7	8.7	38.714	2.8753	6603900	6603900	0	0	NaN	0	NaN	P04083;Q5T3N1	P04083;Q5T3N1	Annexin A1;Annexin	ANXA1
NaN	NaN	NaN	NaN	NaN	NaN			1	1	1	6.6	6.6	6.6	32.853	2.8155	3827100	3827100	0	0	NaN	0	NaN	P04181-2;P04181	P04181-2;P04181	Ornithine aminotransferase, mitochondrial;Ornithine aminotransferase, hepatic form;Ornithine aminotransferase, renal form	OAT
NaN	NaN	NaN	NaN	NaN	NaN			6	1	1	35.4	8.5	8.5	14.105	16.122	37374000	36961000	413250	0	NaN	0	NaN	Q93077;Q7L7L0;P04908	Q93077;Q7L7L0;P04908	Histone H2A type 1-C;Histone H2A type 3;Histone H2A type 1-B/E	HIST1H2AC;HIST3H2A;HIST1H2AB
NaN	NaN	NaN	NaN	NaN	NaN			4	4	4	38.7	38.7	38.7	10.834	11.351	85774000	81124000	4650200	0	NaN	0	NaN	P05109	P05109	Protein S100-A8;Protein S100-A8, N-terminally processed	S100A8
NaN	NaN	NaN	NaN	NaN	NaN			2	2	2	6.7	6.7	6.7	45.059	3.1608	173100000	133230000	39870000	0	NaN	0	NaN	P05121;P05121-2	P05121;P05121-2	Plasminogen activator inhibitor 1	SERPINE1
NaN	NaN	NaN	NaN	NaN	NaN			3	3	3	24.6	24.6	24.6	13.242	2.4864	45731000	43243000	2487400	0	NaN	0	NaN	P06702	P06702	Protein S100-A9	S100A9
NaN	NaN	NaN	NaN	NaN	NaN			34	1	0	72.6	5.2	0	28.922	5.0028	57195000	31782000	25413000	0	NaN	0	NaN	P06753-6;P06753-3;P06753-4;D6R904;K7EP68;D6RFM2	P06753-6;P06753-3;P06753-4;D6R904		TPM3
NaN	NaN	NaN	NaN	NaN	NaN			2	2	2	4.8	4.8	4.8	65.171	4.2383	9521200	7322500	2198800	0	NaN	0	NaN	P07199	P07199	Major centromere autoantigen B	CENPB
NaN	NaN	NaN	NaN	NaN	NaN			1	1	1	5.3	5.3	5.3	37.821	12.461	14873000	14420000	453730	0	NaN	0	NaN	P07858	P07858	Cathepsin B;Cathepsin B light chain;Cathepsin B heavy chain	CTSB
NaN	NaN	NaN	NaN	NaN	NaN			5	3	3	10.4	7.3	7.3	56.033	3.5815	39922000	29734000	10188000	0	NaN	0	NaN	P07948-2;P07948;H0Y3C5;J3KPD6;P08631-3;P08631-2;P08631-4;P08631	P07948-2;P07948;H0Y3C5;J3KPD6;P08631-3;P08631-2;P08631-4;P08631	Tyrosine-protein kinase Lyn;Non-specific protein-tyrosine kinase;Tyrosine-protein kinase HCK	LYN;HCK
NaN	NaN	NaN	NaN	NaN	NaN			1	1	1	3.8	3.8	3.8	75.823	1.8424	2265700	1404400	861250	0	NaN	0	NaN	P08047-3;P08047-2;P08047	P08047-3;P08047-2;P08047	Transcription factor Sp1	SP1
NaN	NaN	NaN	NaN	NaN	NaN			2	2	2	4.3	4.3	4.3	62.168	3.6927	9779500	5006200	4773300	0	NaN	0	NaN	P08243-2;P08243;C9JLN6;C9JM09;C9JT45;C9J057;F8WEJ5;P08243-3	P08243-2;P08243;C9JLN6;C9JM09;C9JT45;C9J057;F8WEJ5;P08243-3	Asparagine synthetase [glutamine-hydrolyzing]	ASNS
NaN	NaN	NaN	NaN	NaN	NaN			2	2	1	10.6	10.6	7.9	45.412	12.844	99645000	78806000	20839000	0	NaN	0	NaN	P08651-4;P08651-5;P08651-3;P08651-6;P08651-2;P08651	P08651-4;P08651-5;P08651-3;P08651-6;P08651-2;P08651	Nuclear factor 1 C-type	NFIC
NaN	NaN	NaN	NaN	NaN	NaN			37	1	0	71.1	4.6	0	32.847	8.8711	101980000	54321000	47656000	0	NaN	0	NaN	P09493-4;P09493-10;P09493;H0YL52;H0YKX5;H0YKP3;P09493-6;H0YNC7;H0YL42;H0YL80;A0A087WTJ7;H0YKZ6	P09493-4;P09493-10;P09493;H0YL52;H0YKX5;H0YKP3	Tropomyosin alpha-1 chain	TPM1
NaN	NaN	NaN	NaN	NaN	NaN			2	2	2	14.2	14.2	14.2	23.662	6.9222	83976000	51881000	32095000	0	NaN	0	NaN	P09496-2;F8WF69;P09496-5;P09496-4;P09496-3;P09496	P09496-2;F8WF69;P09496-5;P09496-4;P09496-3;P09496	Clathrin light chain A	CLTA
NaN	NaN	NaN	NaN	NaN	NaN			2	2	2	10.9	10.9	10.9	29.668	4.431	985780	422190	563590	0	NaN	0	NaN	P47985;P0C7P4	P47985;P0C7P4	Cytochrome b-c1 complex subunit Rieske, mitochondrial;Cytochrome b-c1 complex subunit 11;Putative cytochrome b-c1 complex subunit Rieske-like protein 1	UQCRFS1;UQCRFS1P1
NaN	NaN	NaN	NaN	NaN	NaN			2	2	2	0.9	0.9	0.9	211.68	1.8953	5765100	3736900	2028100	0	NaN	0	NaN	P10586-2;P10586;H0Y4H1;H0Y7Z9;H0Y6Z7	P10586-2;P10586;H0Y4H1;H0Y7Z9;H0Y6Z7	Receptor-type tyrosine-protein phosphatase F	PTPRF
NaN	NaN	NaN	NaN	NaN	NaN			2	2	2	9.7	9.7	9.7	42.644	11.546	72147000	72147000	0	0	NaN	0	NaN	P12277;H0YJG0;G3V4N7	P12277;H0YJG0;G3V4N7	Creatine kinase B-type	CKB
NaN	NaN	NaN	NaN	NaN	NaN			2	2	2	7.3	7.3	7.3	41.439	6.7756	106810000	35457000	71350000	0	NaN	0	NaN	P14373-2;P14373;H0Y551	P14373-2;P14373;H0Y551	Zinc finger protein RFP	TRIM27
NaN	NaN	NaN	NaN	NaN	NaN			1	1	1	4.3	4.3	4.3	44.102	3.4686	68952000	26998000	41954000	0	NaN	0	NaN	P14635-2;P14635	P14635-2;P14635	G2/mitotic-specific cyclin-B1	CCNB1
NaN	NaN	NaN	NaN	NaN	NaN			5	1	1	19.7	3.6	3.6	40.904	4.5585	73402000	22392000	51010000	0	NaN	0	NaN	P16188;Q5SRN7;Q5SRN5;Q29960-2;P30447;P13746;P05534;P04439;Q29960;P30508;P13746-2;A0A0G2JI36;A0A0G2JIF0;A0A0G2JIF2;A0A0G2JH50;A0A0G2JL56;A2BF26;Q29940;P30493;P30492;P30455;P30443;P30510;P30504;Q9TNN7;Q29963;Q07000;P30505;P30685;P30498;P30495;P30491;P30490;P30484;P30464;P18465;P18464;P10319;P01893;P30480;P30479;P30466;P30462;P30460;P18463;P30501;Q29865;Q31611;A0A0G2JNX1;Q8MH48;A0A0G2JNF2;Q5RJ85;A0A…	P16188;Q5SRN7;Q5SRN5;Q29960-2;P30447;P13746;P05534;P04439;Q29960;P30508;P13746-2;A0A0G2JI36;A0A0G2JIF0;A0A0G2JIF2;A0A0G2JH50;A0A0G2JL56;A2BF26;Q29940;P30493;P30492;P30455;P30443;P30510;P30504;Q9TNN7;Q29963;Q07000;P30505	HLA class I histocompatibility antigen, A-30 alpha chain;HLA class I histocompatibility antigen, Cw-16 alpha chain;HLA class I histocompatibility antigen, A-23 alpha chain;HLA class I histocompatibility antigen, A-11 alpha chain;HLA class I histocompatibility antigen, A-24 alpha chain;HLA class I histocompatibility antigen, A-3 alpha chain;HLA class I histocompatibility antigen, Cw-12 alpha chain…	HLA-A;HLA-C;HLA-B
NaN	NaN	NaN	NaN	NaN	NaN			2	2	2	9.2	9.2	9.2	43.008	9.9408	19605000	12668000	6936400	0	NaN	0	NaN	P17302	P17302	Gap junction alpha-1 protein	GJA1
NaN	NaN	NaN	NaN	NaN	NaN			3	3	3	18.9	18.9	18.9	28.804	9.1678	200480000	180060000	20419000	0	NaN	0	NaN	P18669;P15259;Q8N0Y7	P18669;P15259	Phosphoglycerate mutase 1;Phosphoglycerate mutase 2	PGAM1;PGAM2
NaN	NaN	NaN	NaN	NaN	NaN			3	3	3	6.9	6.9	6.9	50.315	2.0388	3223800	841850	2382000	0	NaN	0	NaN	P20073-2;P20073	P20073-2;P20073	Annexin A7	ANXA7
NaN	NaN	NaN	NaN	NaN	NaN			1	1	1	17.3	17.3	17.3	17.699	34.589	16903000	16903000	0	0	NaN	0	NaN	P20290-2;P20290	P20290-2;P20290	Transcription factor BTF3	BTF3
NaN	NaN	NaN	NaN	NaN	NaN			136	1	1	69.1	0.6	0.6	280.01	14.39	621680000	335940000	285740000	0	NaN	0	NaN	P21333-2;P21333;Q5HY54;F8WE98;H0Y5C6;H0Y5F3;H7C2E7	P21333-2;P21333;Q5HY54	Filamin-A	FLNA
NaN	NaN	NaN	NaN	NaN	NaN			1	1	1	3.1	3.1	3.1	98.398	2.4309	3604500	3604500	0	0	NaN	0	NaN	P21399	P21399	Cytoplasmic aconitate hydratase	ACO1
NaN	NaN	NaN	NaN	NaN	NaN			1	1	1	11.6	11.6	11.6	18.884	7.6483	14418000	13843000	575360	0	NaN	0	NaN	P23434	P23434	Glycine cleavage system H protein, mitochondrial	GCSH
NaN	NaN	NaN	NaN	NaN	NaN			1	1	1	3	3	3	45.199	2.0357	2002100	790700	1211400	0	NaN	0	NaN	P24752	P24752	Acetyl-CoA acetyltransferase, mitochondrial	ACAT1
NaN	NaN	NaN	NaN	NaN	NaN			3	3	3	16.2	16.2	16.2	27.016	5.3682	23306000	5336400	17970000	0	NaN	0	NaN	P25685-2;P25685;M0R080;M0R1D6;M0QZD0;M0QYT3;M0QXK0;Q9UDY4	P25685-2;P25685;M0R080	DnaJ homolog subfamily B member 1	DNAJB1
NaN	NaN	NaN	NaN	NaN	NaN			1	1	1	1.7	1.7	1.7	83.434	2.4627	737970	691010	46959	0	NaN	0	NaN	P26639;P26639-2	P26639;P26639-2	Threonine--tRNA ligase, cytoplasmic	TARS
NaN	NaN	NaN	NaN	NaN	NaN			3	3	3	42.3	42.3	42.3	15.649	13.693	69643000	69643000	0	0	NaN	0	NaN	P26885;F5H0N4	P26885	Peptidyl-prolyl cis-trans isomerase FKBP2	FKBP2
NaN	NaN	NaN	NaN	NaN	NaN			1	1	1	6.3	6.3	6.3	35.554	3.6296	2655700	2655700	0	0	NaN	0	NaN	P27695	P27695	DNA-(apurinic or apyrimidinic site) lyase;DNA-(apurinic or apyrimidinic site) lyase, mitochondrial	APEX1
NaN	NaN	NaN	NaN	NaN	NaN			7	1	1	12.6	1.6	1.6	85.251	2.8925	0	0	0	0	NaN	0	NaN	P27816-5;H7C4C5	P27816-5;H7C4C5	Microtubule-associated protein 4;Microtubule-associated protein	MAP4
NaN	NaN	NaN	NaN	NaN	NaN			1	1	1	7.6	7.6	7.6	29.204	5.1434	25674000	25674000	0	0	NaN	0	NaN	P28070	P28070	Proteasome subunit beta type-4	PSMB4
NaN	NaN	NaN	NaN	NaN	NaN			2	2	2	6.5	6.5	6.5	46.944	3.6838	20297000	12329000	7968100	0	NaN	0	NaN	P28300	P28300	Protein-lysine 6-oxidase	LOX
NaN	NaN	NaN	NaN	NaN	NaN			1	1	1	0.8	0.8	0.8	139.76	2.419	749490	749490	0	0	NaN	0	NaN	Q5VZU9;P29144	Q5VZU9;P29144	Tripeptidyl-peptidase 2	TPP2
NaN	NaN	NaN	NaN	NaN	NaN			4	4	4	13.6	13.6	13.6	44.564	4.3068	4826400	4522600	303790	0	NaN	0	NaN	P29508;Q5K684;P29508-2;H0Y5H9;P48594;C9JZ65	P29508;Q5K684;P29508-2;H0Y5H9;P48594	Serpin B3;Serpin B4	SERPINB3;SERPINB4
NaN	NaN	NaN	NaN	NaN	NaN			1	1	1	12.3	12.3	12.3	28.993	3.5672	8284200	8284200	0	0	NaN	0	NaN	P30040	P30040	Endoplasmic reticulum resident protein 29	ERP29
NaN	NaN	NaN	NaN	NaN	NaN			3	3	3	21.3	21.3	21.3	22.04	19.883	19957000	19823000	134430	0	NaN	0	NaN	P30405;R4GN99;E9PKY5;E9PEQ6;P30405-2;Q9UNP9-2;Q9UNP9;Q9UNP9-3	P30405	Peptidyl-prolyl cis-trans isomerase F, mitochondrial	PPIF
NaN	NaN	NaN	NaN	NaN	NaN			2	2	2	11.4	11.4	11.4	50.582	15.845	11862000	11862000	0	0	NaN	0	NaN	P31150;Q5SX91;Q5SX87;P50395-2;P50395	P31150;Q5SX91;Q5SX87;P50395-2;P50395	Rab GDP dissociation inhibitor alpha;Rab GDP dissociation inhibitor beta	GDI1;GDI2
NaN	NaN	NaN	NaN	NaN	NaN			4	4	4	17.8	17.8	17.8	27.679	5.3001	10186000	9516600	669110	0	NaN	0	NaN	P31944	P31944	Caspase-14;Caspase-14 subunit p17, mature form;Caspase-14 subunit p10, mature form;Caspase-14 subunit p20, intermediate form;Caspase-14 subunit p8, intermediate form	CASP14
NaN	NaN	NaN	NaN	NaN	NaN			1	1	1	3.9	3.9	3.9	59.777	5.3556	11411000	11411000	0	0	NaN	0	NaN	P31948-3;P31948;P31948-2	P31948-3;P31948;P31948-2	Stress-induced-phosphoprotein 1	STIP1
NaN	NaN	NaN	NaN	NaN	NaN			2	2	2	9	9	9	42.621	22.475	17972000	17972000	0	0	NaN	0	NaN	P35237;A0A024QZX5;A0A087X1N8	P35237;A0A024QZX5;A0A087X1N8	Serpin B6	SERPINB6
NaN	NaN	NaN	NaN	NaN	NaN			1	1	1	4.3	4.3	4.3	34.36	1.8404	6737500	2231200	4506300	0	NaN	0	NaN	P35914	P35914	Hydroxymethylglutaryl-CoA lyase, mitochondrial	HMGCL
NaN	NaN	NaN	NaN	NaN	NaN			2	2	2	5.5	5.5	5.5	48.633	11.963	106000000	51665000	54334000	0	NaN	0	NaN	P35998;C9JLS9;P35998-2	P35998;C9JLS9;P35998-2	26S protease regulatory subunit 7	PSMC2
NaN	NaN	NaN	NaN	NaN	NaN			2	2	2	22.3	22.3	22.3	18.056	8.6258	31489000	27255000	4234800	0	NaN	0	NaN	P36404-2;V9GYD0;P36404	P36404-2;V9GYD0;P36404	ADP-ribosylation factor-like protein 2	ARL2;ARL2-SNX15
NaN	NaN	NaN	NaN	NaN	NaN			2	2	2	10.4	10.4	10.4	20.455	87.431	143210000	142260000	950520	0	NaN	0	NaN	P36405	P36405	ADP-ribosylation factor-like protein 3	ARL3
NaN	NaN	NaN	NaN	NaN	NaN			1	1	1	1.8	1.8	1.8	61.068	2.5885	21728000	20686000	1041600	0	NaN	0	NaN	P36406-3;P36406-2;P36406	P36406-3;P36406-2;P36406	E3 ubiquitin-protein ligase TRIM23	TRIM23
NaN	NaN	NaN	NaN	NaN	NaN			12	1	1	35.2	4.4	4.4	32.996	5.143	0	0	0	0	NaN	0	NaN	P36542	P36542	ATP synthase subunit gamma, mitochondrial	ATP5C1
NaN	NaN	NaN	NaN	NaN	NaN			1	1	1	3.6	3.6	3.6	61.448	22.942	47065000	47065000	0	0	NaN	0	NaN	P36871;P36871-2	P36871;P36871-2	Phosphoglucomutase-1	PGM1
NaN	NaN	NaN	NaN	NaN	NaN			1	1	1	0.9	0.9	0.9	147.07	2.2731	1007400	764680	242740	0	NaN	0	NaN	P39880-6;P39880-4;P39880-5;P39880-2;P39880;P39880-3	P39880-6;P39880-4;P39880-5;P39880-2;P39880;P39880-3	Homeobox protein cut-like 1	CUX1
NaN	NaN	NaN	NaN	NaN	NaN			2	2	2	8.9	8.9	8.9	35.503	15.459	21714000	17849000	3864900	0	NaN	0	NaN	P40926;G3XAL0;P40926-2	P40926;G3XAL0;P40926-2	Malate dehydrogenase, mitochondrial;Malate dehydrogenase	MDH2
NaN	NaN	NaN	NaN	NaN	NaN			4	4	4	7.7	7.7	7.7	67.531	5.1115	42646000	3792600	38854000	0	NaN	0	NaN	P43304-2;P43304;F5GYK7	P43304-2;P43304	Glycerol-3-phosphate dehydrogenase, mitochondrial	GPD2
NaN	NaN	NaN	NaN	NaN	NaN			3	1	1	9.1	3.6	3.6	34.342	2.2907	34120000	15965000	18155000	0	NaN	0	NaN	P43355;Q3SYA6;Q8TD91-2;A0A0A0MSA3;O60732-2;A2A368;A8MXT2;Q96M61;O15480;O60732	P43355	Melanoma-associated antigen 1	MAGEA1
NaN	NaN	NaN	NaN	NaN	NaN			3	3	3	11.5	11.5	11.5	47.366	9.2231	24546000	8798100	15748000	0	NaN	0	NaN	P43686;P43686-2	P43686;P43686-2	26S protease regulatory subunit 6B	PSMC4
NaN	NaN	NaN	NaN	NaN	NaN			1	1	1	16	16	16	22.763	19.351	8208500	8208500	0	0	NaN	0	NaN	P45877	P45877	Peptidyl-prolyl cis-trans isomerase C	PPIC
NaN	NaN	NaN	NaN	NaN	NaN			1	1	1	4.3	4.3	4.3	34.579	3.047	53630000	21558000	32071000	0	NaN	0	NaN	P48651-3;P48651-2;P48651	P48651-3;P48651-2;P48651	Phosphatidylserine synthase 1	PTDSS1
NaN	NaN	NaN	NaN	NaN	NaN			1	1	1	2.3	2.3	2.3	81.742	19.424	21023000	0	21023000	0	NaN	0	NaN	P48960-2;P48960-3;P48960	P48960-2;P48960-3;P48960	CD97 antigen;CD97 antigen subunit alpha;CD97 antigen subunit beta	CD97
NaN	NaN	NaN	NaN	NaN	NaN			2	2	2	12.1	12.1	12.1	45.793	57.873	297100000	297100000	0	0	NaN	0	NaN	Q5T624;P49321-2;P49321;H0YDS9;E9PI86;E9PRH9;H0YF33;P49321-4;P49321-3	Q5T624;P49321-2;P49321;H0YDS9;E9PI86;E9PRH9;H0YF33;P49321-4;P49321-3	Nuclear autoantigenic sperm protein	NASP
NaN	NaN	NaN	NaN	NaN	NaN			1	1	1	2.6	2.6	2.6	61.312	12.754	3708200	3708200	0	0	NaN	0	NaN	Q5T5C7;P49591	Q5T5C7;P49591	Serine--tRNA ligase, cytoplasmic	SARS
NaN	NaN	NaN	NaN	NaN	NaN			1	1	1	2.2	2.2	2.2	58.805	1.886	20481000	9848600	10633000	0	NaN	0	NaN	P49643	P49643	DNA primase large subunit	PRIM2
NaN	NaN	NaN	NaN	NaN	NaN			2	2	2	14.9	14.9	14.9	22.836	12.564	51274000	38638000	12635000	0	NaN	0	NaN	P49721;A0A087WVV1	P49721;A0A087WVV1	Proteasome subunit beta type-2	PSMB2
NaN	NaN	NaN	NaN	NaN	NaN			2	2	2	7.9	7.9	7.9	48.824	6.8681	34693000	28564000	6128800	0	NaN	0	NaN	P49757-8;P49757-7;P49757-6;P49757-5;P49757-4;P49757-2;P49757-3;P49757;G3V3M5;G3V3R1;G3V3Z8;P49757-9	P49757-8;P49757-7;P49757-6;P49757-5;P49757-4;P49757-2;P49757-3;P49757;G3V3M5;G3V3R1;G3V3Z8;P49757-9	Protein numb homolog	NUMB
NaN	NaN	NaN	NaN	NaN	NaN			1	1	1	6	6	6	24.635	3.4686	15581000	7981700	7599100	0	NaN	0	NaN	P49795	P49795	Regulator of G-protein signaling 19	RGS19
NaN	NaN	NaN	NaN	NaN	NaN			2	2	2	18.8	18.8	18.8	16.162	63.113	53488000	51209000	2279200	0	NaN	0	NaN	P51452-2;P51452;K7ELG5;K7ES89	P51452-2;P51452;K7ELG5;K7ES89	Dual specificity protein phosphatase 3	DUSP3
NaN	NaN	NaN	NaN	NaN	NaN			1	1	1	12.3	12.3	12.3	20.12	5.5729	5053300	5053300	0	0	NaN	0	NaN	P51809-3;P51809;P51809-2	P51809-3;P51809;P51809-2	Vesicle-associated membrane protein 7	VAMP7
NaN	NaN	NaN	NaN	NaN	NaN			3	3	3	3.6	3.6	3.6	119.16	8.7353	4837300	837170	4000100	0	NaN	0	NaN	P52732	P52732	Kinesin-like protein KIF11	KIF11
NaN	NaN	NaN	NaN	NaN	NaN			1	1	1	6.1	6.1	6.1	33.428	8.6227	10639000	10639000	0	0	NaN	0	NaN	P53004	P53004	Biliverdin reductase A	BLVRA
NaN	NaN	NaN	NaN	NaN	NaN			2	2	2	5.8	5.8	5.8	68.254	2.0816	77811000	29461000	48350000	0	NaN	0	NaN	P53350;I3L387	P53350;I3L387	Serine/threonine-protein kinase PLK1	PLK1
NaN	NaN	NaN	NaN	NaN	NaN			1	1	1	7.2	7.2	7.2	17.318	3.1804	3412000	834110	2577900	0	NaN	0	NaN	Q5T4U8;P53611	Q5T4U8;P53611	Geranylgeranyl transferase type-2 subunit beta	RABGGTB
NaN	NaN	NaN	NaN	NaN	NaN			3	3	3	14.3	14.3	14.3	31.512	6.8191	114600000	923860	113670000	0	NaN	0	NaN	P54709;C9JA36;P54709-2;H7C4L9;H7C547;F8WBY4;C9JXZ1	P54709;C9JA36;P54709-2	Sodium/potassium-transporting ATPase subunit beta-3	ATP1B3
NaN	NaN	NaN	NaN	NaN	NaN			1	1	1	6.1	6.1	6.1	36.579	40.81	40645000	40645000	0	0	NaN	0	NaN	P55263-4;P55263-2;P55263	P55263-4;P55263-2;P55263	Adenosine kinase	ADK
NaN	NaN	NaN	NaN	NaN	NaN			4	2	2	70.9	27.3	27.3	6.2953	6.0582	32533000	9652100	22881000	0	NaN	0	NaN	P56134-3;P56134	P56134-3;P56134	ATP synthase subunit f, mitochondrial	ATP5J2
NaN	NaN	NaN	NaN	NaN	NaN			4	4	4	34.1	34.1	34.1	17.958	48.074	574090000	573890000	199430	0	NaN	0	NaN	P60174-4;P60174-1;P60174;U3KQF3;U3KPZ0	P60174-4;P60174-1;P60174	Triosephosphate isomerase	TPI1
NaN	NaN	NaN	NaN	NaN	NaN			5	2	2	29.3	14.4	14.4	23.707	5.9302	1918100	0	1918100	0	NaN	0	NaN	P61020;F8VUA5;P61020-2	P61020;F8VUA5;P61020-2	Ras-related protein Rab-5B	RAB5B
NaN	NaN	NaN	NaN	NaN	NaN			2	2	2	26.1	26.1	26.1	17.447	82.248	127470000	127470000	0	0	NaN	0	NaN	P61086-3;P61086;D6RDM7;P61086-2	P61086-3;P61086;D6RDM7;P61086-2	Ubiquitin-conjugating enzyme E2 K	UBE2K
NaN	NaN	NaN	NaN	NaN	NaN			3	3	3	20.4	20.4	20.4	20.409	7.5086	61597000	14309000	47288000	0	NaN	0	NaN	X6RFL8;P61106	X6RFL8;P61106	Ras-related protein Rab-14	RAB14
NaN	NaN	NaN	NaN	NaN	NaN			1	1	1	3	3	3	67.314	6.3319	7321100	7321100	0	0	NaN	0	NaN	P61221	P61221	ATP-binding cassette sub-family E member 1	ABCE1
NaN	NaN	NaN	NaN	NaN	NaN			3	1	1	18	6.6	6.6	20.504	2.2791	5518700	3486800	2032000	0	NaN	0	NaN	P61225	P61225	Ras-related protein Rap-2b	RAP2B
NaN	NaN	NaN	NaN	NaN	NaN			1	1	1	41.2	41.2	41.2	9.1175	8.9921	8098600	8098600	0	0	NaN	0	NaN	P61960;P61960-2	P61960;P61960-2	Ubiquitin-fold modifier 1	UFM1
NaN	NaN	NaN	NaN	NaN	NaN			1	1	1	3.2	3.2	3.2	38.926	2.1707	0	0	0	0	NaN	0	NaN	P61962	P61962	DDB1- and CUL4-associated factor 7	DCAF7
NaN	NaN	NaN	NaN	NaN	NaN			1	1	1	23.2	23.2	23.2	5.9446	1.9454	67872000	67872000	0	0	NaN	0	NaN	V9GYQ5;V9GZ59;P61964	V9GYQ5;V9GZ59;P61964	WD repeat-containing protein 5	WDR5
NaN	NaN	NaN	NaN	NaN	NaN			2	2	2	26.3	26.3	26.3	20.082	17.194	93604000	92875000	729650	0	NaN	0	NaN	P62330	P62330	ADP-ribosylation factor 6	ARF6
NaN	NaN	NaN	NaN	NaN	NaN			4	1	1	30.7	8.3	8.3	22.677	7.5811	7274700	7274700	0	0	NaN	0	NaN	P62820;E7END7;P62820-3;P62820-2	P62820;E7END7;P62820-3;P62820-2	Ras-related protein Rab-1A	RAB1A
NaN	NaN	NaN	NaN	NaN	NaN			3	3	3	52.2	52.2	52.2	10.118	27.676	362120000	361540000	581390	0	NaN	0	NaN	Q1JUQ5;Q5W0X3;P62942;Q5VVH2	Q1JUQ5;Q5W0X3;P62942;Q5VVH2	Peptidyl-prolyl cis-trans isomerase;Peptidyl-prolyl cis-trans isomerase FKBP1A	FKBP12-Exip2;FKBP1A;FKBP1C
NaN	NaN	NaN	NaN	NaN	NaN			6	1	1	19.2	4.2	4.2	40.361	7.8546	94356000	51459000	42897000	0	NaN	0	NaN	P63096;P63096-2;C9JPP4	P63096;P63096-2	Guanine nucleotide-binding protein G(i) subunit alpha-1	GNAI1
NaN	NaN	NaN	NaN	NaN	NaN			2	2	2	33.8	33.8	33.8	16.786	173.09	63054000	63054000	0	0	NaN	0	NaN	P83876;K7EPA6;K7EJU2;K7ESL1;K7EMX5;O14835;K7ES07	P83876;K7EPA6;K7EJU2;K7ESL1;K7EMX5;O14835;K7ES07	Thioredoxin-like protein 4A	TXNL4A
NaN	NaN	NaN	NaN	NaN	NaN			3	3	3	21.1	21.1	21.1	31.806	41.591	277440000	276770000	671230	0	NaN	0	NaN	Q00169;I3L471;I3L4U7;F5GWE5;I3L3W1;I3L2X8;I3L4C0;I3L459;I3L4H1	Q00169;I3L471;I3L4U7;F5GWE5	Phosphatidylinositol transfer protein alpha isoform	PITPNA
NaN	NaN	NaN	NaN	NaN	NaN			4	4	4	25.2	25.2	25.2	15.164	7.5784	28257000	25641000	2615600	0	NaN	0	NaN	Q01469;I6L8B7	Q01469	Fatty acid-binding protein, epidermal	FABP5
NaN	NaN	NaN	NaN	NaN	NaN			4	4	4	11.6	11.6	11.6	51.83	31.184	116760000	115570000	1189000	0	NaN	0	NaN	Q01518-2;Q01518;Q5T0R7;Q5T0R6;Q5T0R5;Q5T0R4;Q5T0R3;Q5T0R2;Q5T0R1;Q5T0R9	Q01518-2;Q01518;Q5T0R7;Q5T0R6;Q5T0R5;Q5T0R4;Q5T0R3;Q5T0R2;Q5T0R1;Q5T0R9	Adenylyl cyclase-associated protein 1;Adenylyl cyclase-associated protein	CAP1
NaN	NaN	NaN	NaN	NaN	NaN			1	1	1	18.6	18.6	18.6	12.133	5.6407	0	0	0	0	NaN	0	NaN	V9GYV7;Q5VSR5;Q01813-2;Q01813	V9GYV7;Q5VSR5;Q01813-2;Q01813	ATP-dependent 6-phosphofructokinase, platelet type	PFKP
NaN	NaN	NaN	NaN	NaN	NaN			7	7	7	9	9	9	113.75	20.165	57479000	44472000	13007000	0	NaN	0	NaN	Q02413;Q02413-2	Q02413	Desmoglein-1	DSG1
NaN	NaN	NaN	NaN	NaN	NaN			2	2	2	4.3	4.3	4.3	83.549	8.2807	57159000	24145000	33015000	0	NaN	0	NaN	Q02809;Q02809-2;Q5JXB8;Q5JXB7	Q02809;Q02809-2;Q5JXB8;Q5JXB7	Procollagen-lysine,2-oxoglutarate 5-dioxygenase 1	PLOD1
NaN	NaN	NaN	NaN	NaN	NaN			1	1	1	9.5	9.5	9.5	19.043	2.5447	30682000	18497000	12185000	0	NaN	0	NaN	Q04760-2;Q04760	Q04760-2;Q04760	Lactoylglutathione lyase	GLO1
NaN	NaN	NaN	NaN	NaN	NaN			10	1	1	26.1	2.6	2.6	50.47	2.8265	3870300	1619400	2250900	0	NaN	0	NaN	Q05639	Q05639	Elongation factor 1-alpha 2	EEF1A2
NaN	NaN	NaN	NaN	NaN	NaN			1	1	1	6.8	6.8	6.8	57.398	8.9144	5060200	5060200	0	0	NaN	0	NaN	Q06203	Q06203	Amidophosphoribosyltransferase	PPAT
NaN	NaN	NaN	NaN	NaN	NaN			1	1	1	7.9	7.9	7.9	18.129	5.5971	13606000	13606000	0	0	NaN	0	NaN	Q07812-5;Q07812-7;Q07812-8;Q07812;Q07812-2	Q07812-5;Q07812-7;Q07812-8;Q07812;Q07812-2	Apoptosis regulator BAX	BAX
NaN	NaN	NaN	NaN	NaN	NaN			2	2	2	3.1	3.1	3.1	93.834	2.5198	22345000	22345000	0	0	NaN	0	NaN	Q08554-2;Q08554	Q08554-2;Q08554	Desmocollin-1	DSC1
NaN	NaN	NaN	NaN	NaN	NaN			1	1	1	1.8	1.8	1.8	82.921	5.0828	5282700	3579500	1703200	0	NaN	0	NaN	Q12996	Q12996	Cleavage stimulation factor subunit 3	CSTF3
NaN	NaN	NaN	NaN	NaN	NaN			1	1	1	2.4	2.4	2.4	56.3	2.0462	9826800	5914800	3912100	0	NaN	0	NaN	Q13188;Q13188-2	Q13188;Q13188-2	Serine/threonine-protein kinase 3;Serine/threonine-protein kinase 3 36kDa subunit;Serine/threonine-protein kinase 3 20kDa subunit	STK3
NaN	NaN	NaN	NaN	NaN	NaN			1	1	1	2.5	2.5	2.5	50.519	3.3274	38205000	16809000	21396000	0	NaN	0	NaN	Q13325-2;Q13325	Q13325-2;Q13325	Interferon-induced protein with tetratricopeptide repeats 5	IFIT5
NaN	NaN	NaN	NaN	NaN	NaN			2	2	2	9.3	9.3	9.3	24.997	3.2404	16832000	3755100	13076000	0	NaN	0	NaN	Q13637;O14966;P57729	Q13637;O14966;P57729	Ras-related protein Rab-32;Ras-related protein Rab-7L1;Ras-related protein Rab-38	RAB32;RAB29;RAB38
NaN	NaN	NaN	NaN	NaN	NaN			162	1	1	69.8	0.7	0.7	282.28	14.103	97813000	62855000	34958000	0	NaN	0	NaN	Q13813-3;A0A0D9SF54;A0A0D9SFF6;A0A0D9SFH4	Q13813-3;A0A0D9SF54	Spectrin alpha chain, non-erythrocytic 1	SPTAN1
NaN	NaN	NaN	NaN	NaN	NaN			2	2	2	3.1	3.1	3.1	83.654	1.8659	5094100	5094100	0	0	NaN	0	NaN	Q13823;H0YG10	Q13823;H0YG10	Nucleolar GTP-binding protein 2	GNL2
NaN	NaN	NaN	NaN	NaN	NaN			1	1	1	8.4	8.4	8.4	26.319	6.3436	29107000	28812000	295310	0	NaN	0	NaN	Q13907;Q13907-2	Q13907;Q13907-2	Isopentenyl-diphosphate Delta-isomerase 1	IDI1
NaN	NaN	NaN	NaN	NaN	NaN			3	3	3	25.4	25.4	25.4	15.945	26.503	219220000	202740000	16477000	0	NaN	0	NaN	Q14019;H3BT58	Q14019;H3BT58	Coactosin-like protein	COTL1
NaN	NaN	NaN	NaN	NaN	NaN			2	2	2	8.9	8.9	8.9	33.287	4.2182	23984000	4781900	19202000	0	NaN	0	NaN	Q14344-2;Q14344	Q14344-2;Q14344	Guanine nucleotide-binding protein subunit alpha-13	GNA13
NaN	NaN	NaN	NaN	NaN	NaN			2	2	2	4.9	4.9	4.9	92.888	25.763	21388000	20510000	877740	0	NaN	0	NaN	Q14566	Q14566	DNA replication licensing factor MCM6	MCM6
NaN	NaN	NaN	NaN	NaN	NaN			8	1	1	2.9	0.7	0.7	306.77	3.1456	5235700	2939100	2296600	0	NaN	0	NaN	Q14643-4;Q14643-3;Q14643-8;Q14643-7;Q14643-5;Q14643-6;Q14643-2;Q14643;B7ZMI3;Q14571-2	Q14643-4;Q14643-3;Q14643-8;Q14643-7;Q14643-5;Q14643-6;Q14643-2;Q14643	Inositol 1,4,5-trisphosphate receptor type 1	ITPR1
NaN	NaN	NaN	NaN	NaN	NaN			4	4	4	5.6	5.6	5.6	116.63	3.2072	8390700	8032600	358120	0	NaN	0	NaN	Q14676-4;Q14676-3;Q14676-2;Q14676	Q14676-4;Q14676-3;Q14676-2;Q14676	Mediator of DNA damage checkpoint protein 1	MDC1
NaN	NaN	NaN	NaN	NaN	NaN			2	2	2	1.8	1.8	1.8	145.81	5.1008	42966000	26036000	16930000	0	NaN	0	NaN	Q14692	Q14692	Ribosome biogenesis protein BMS1 homolog	BMS1
NaN	NaN	NaN	NaN	NaN	NaN			5	5	5	7	7	7	90.828	33.731	369070000	10098000	358980000	0	NaN	0	NaN	Q14BN4-2;Q14BN4-3;Q14BN4;H7C3M8;H7BZK0;Q14BN4-4;Q14BN4-6;H7C5G9;H7BZW9;B7Z863;B7Z964;Q14BN4-8;Q14BN4-5;Q14BN4-7;C9JA20;C9JCH4	Q14BN4-2;Q14BN4-3;Q14BN4;H7C3M8;H7BZK0;Q14BN4-4;Q14BN4-6	Sarcolemmal membrane-associated protein	SLMAP
NaN	NaN	NaN	NaN	NaN	NaN			1	1	1	4.7	4.7	4.7	31.051	1.7798	5051400	400240	4651100	0	NaN	0	NaN	Q15013;Q15013-3	Q15013;Q15013-3	MAD2L1-binding protein	MAD2L1BP
NaN	NaN	NaN	NaN	NaN	NaN			1	1	1	4.7	4.7	4.7	41.193	5.7174	10182000	9759600	422610	0	NaN	0	NaN	Q15050	Q15050	Ribosome biogenesis regulatory protein homolog	RRS1
NaN	NaN	NaN	NaN	NaN	NaN			1	1	1	0.7	0.7	0.7	186.49	2.046	43526000	43526000	0	0	NaN	0	NaN	Q15058	Q15058	Kinesin-like protein KIF14	KIF14
NaN	NaN	NaN	NaN	NaN	NaN			1	1	1	6.8	6.8	6.8	21.995	3.3689	11130000	11130000	0	0	NaN	0	NaN	Q15126	Q15126	Phosphomevalonate kinase	PMVK
NaN	NaN	NaN	NaN	NaN	NaN			454	1	0	77.9	0.4	0	518.47	18.537	218620000	125060000	93559000	0	NaN	0	NaN	Q15149-2;Q15149-7;Q15149-8;Q15149-5;Q15149-6;E9PMV1	Q15149-2;Q15149-7;Q15149-8;Q15149-5;Q15149-6	Plectin	PLEC
NaN	NaN	NaN	NaN	NaN	NaN			1	1	1	14.1	14.1	14.1	20.497	6.3585	5376800	5376800	0	0	NaN	0	NaN	Q15382	Q15382	GTP-binding protein Rheb	RHEB
NaN	NaN	NaN	NaN	NaN	NaN			2	2	2	13.8	13.8	13.8	16.298	4.1027	30464000	14603000	15860000	0	NaN	0	NaN	Q15388	Q15388	Mitochondrial import receptor subunit TOM20 homolog	TOMM20
NaN	NaN	NaN	NaN	NaN	NaN			1	1	1	2.3	2.3	2.3	48.55	3.3692	44312000	12914000	31398000	0	NaN	0	NaN	Q15645	Q15645	Pachytene checkpoint protein 2 homolog	TRIP13
NaN	NaN	NaN	NaN	NaN	NaN			2	2	2	10.4	10.4	10.4	29.999	3.731	10986000	10655000	330360	0	NaN	0	NaN	Q15691	Q15691	Microtubule-associated protein RP/EB family member 1	MAPRE1
NaN	NaN	NaN	NaN	NaN	NaN			1	1	1	5.8	5.8	5.8	34.559	8.335	13661000	12874000	787450	0	NaN	0	NaN	Q15785	Q15785	Mitochondrial import receptor subunit TOM34	TOMM34
NaN	NaN	NaN	NaN	NaN	NaN			3	3	3	32.4	32.4	32.4	16.363	51.147	104130000	93473000	10653000	0	NaN	0	NaN	Q15819;E5RIF1;D6RG00;H0YBX6;I3L0A0;Q13404-8;Q13404;Q13404-7;Q13404-2;Q13404-1;G3V113;H0YBP9	Q15819;E5RIF1;D6RG00;H0YBX6;I3L0A0;Q13404-8;Q13404;Q13404-7;Q13404-2;Q13404-1	Ubiquitin-conjugating enzyme E2 variant 2;Ubiquitin-conjugating enzyme E2 variant 1	UBE2V2;UBE2V1;TMEM189-UBE2V1
NaN	NaN	NaN	NaN	NaN	NaN			2	2	2	24.7	24.7	24.7	9.0714	9.3037	40704000	38553000	2150800	0	NaN	0	NaN	Q15843	Q15843	NEDD8	NEDD8
NaN	NaN	NaN	NaN	NaN	NaN			1	1	1	3.7	3.7	3.7	54.529	12.767	6436100	5404000	1032200	0	NaN	0	NaN	Q16658	Q16658	Fascin	FSCN1
NaN	NaN	NaN	NaN	NaN	NaN			2	2	2	2.1	2.1	2.1	134.62	2.2112	181520	51476	130040	0	NaN	0	NaN	Q27J81-2;Q27J81;A0A0A0MQU1;Q27J81-3	Q27J81-2;Q27J81;A0A0A0MQU1;Q27J81-3	Inverted formin-2	INF2
NaN	NaN	NaN	NaN	NaN	NaN			3	3	3	2.5	2.5	2.5	150.83	3.9374	54053000	11758000	42295000	0	NaN	0	NaN	Q29RF7;H0Y9L6;H0Y9L9;Q9NTI5-4;Q9NTI5-3;Q29RF7-3;Q9NTI5-2;Q9NTI5	Q29RF7	Sister chromatid cohesion protein PDS5 homolog A	PDS5A
NaN	NaN	NaN	NaN	NaN	NaN			3	3	3	5.2	5.2	5.2	91.809	4.7647	48814000	27056000	21759000	0	NaN	0	NaN	Q2NL82;I3L4E8	Q2NL82	Pre-rRNA-processing protein TSR1 homolog	TSR1
NaN	NaN	NaN	NaN	NaN	NaN			3	3	3	6.6	6.6	6.6	57.543	13.463	60396000	35552000	24844000	0	NaN	0	NaN	Q2TAY7;Q2TAY7-2	Q2TAY7	WD40 repeat-containing protein SMU1;WD40 repeat-containing protein SMU1, N-terminally processed	SMU1
NaN	NaN	NaN	NaN	NaN	NaN			2	2	2	3.2	3.2	3.2	78.921	1.7869	3340700	3212400	128390	0	NaN	0	NaN	Q32P28-4;Q32P28;Q32P28-3;E2QRI1;Q32P28-2	Q32P28-4;Q32P28;Q32P28-3;E2QRI1;Q32P28-2	Prolyl 3-hydroxylase 1	LEPRE1;P3H1
NaN	NaN	NaN	NaN	NaN	NaN			2	2	2	2.7	2.7	2.7	132.89	3.0485	4309700	530140	3779600	0	NaN	0	NaN	Q53EP0;Q53EP0-2	Q53EP0;Q53EP0-2	Fibronectin type III domain-containing protein 3B	FNDC3B
NaN	NaN	NaN	NaN	NaN	NaN			2	2	2	5.1	5.1	5.1	48.705	2.7335	1549600	310520	1239100	0	NaN	0	NaN	Q53EU6	Q53EU6	Glycerol-3-phosphate acyltransferase 3	AGPAT9
NaN	NaN	NaN	NaN	NaN	NaN			1	1	1	6.9	6.9	6.9	32.805	12.249	39528000	39528000	0	0	NaN	0	NaN	Q53H82	Q53H82	Beta-lactamase-like protein 2	LACTB2
NaN	NaN	NaN	NaN	NaN	NaN			1	1	1	2.7	2.7	2.7	43.374	1.7842	16248000	5923200	10325000	0	NaN	0	NaN	Q5JVF3-3;Q5JVF3-2;Q5JVF3;Q5JVF3-4	Q5JVF3-3;Q5JVF3-2;Q5JVF3;Q5JVF3-4	PCI domain-containing protein 2	PCID2
NaN	NaN	NaN	NaN	NaN	NaN			2	2	2	8.1	8.1	8.1	38.121	5.5909	21647000	847730	20800000	0	NaN	0	NaN	Q5MNZ6;I3L3A5	Q5MNZ6;I3L3A5	WD repeat domain phosphoinositide-interacting protein 3	WDR45B
NaN	NaN	NaN	NaN	NaN	NaN			1	1	1	9.8	9.8	9.8	30.014	6.2022	9523700	1649400	7874200	0	NaN	0	NaN	Q5QPE8;Q9BQP7	Q5QPE8;Q9BQP7	Mitochondrial genome maintenance exonuclease 1	MGME1
NaN	NaN	NaN	NaN	NaN	NaN			1	1	1	6.7	6.7	6.7	39.028	3.7704	11447000	7901600	3545400	0	NaN	0	NaN	Q5T6V5	Q5T6V5	UPF0553 protein C9orf64	C9orf64
NaN	NaN	NaN	NaN	NaN	NaN			2	2	2	14.5	14.5	14.5	25.072	28.807	79729000	79060000	669210	0	NaN	0	NaN	Q5TDF0;Q9BSD7	Q5TDF0;Q9BSD7	Cancer-related nucleoside-triphosphatase	NTPCR
NaN	NaN	NaN	NaN	NaN	NaN			1	1	1	1.9	1.9	1.9	85.45	2.7746	8154200	1175400	6978800	0	NaN	0	NaN	Q5VSL9-2;Q5VSL9	Q5VSL9-2;Q5VSL9	Striatin-interacting protein 1	STRIP1
NaN	NaN	NaN	NaN	NaN	NaN			4	4	4	3.3	3.3	3.3	201.05	11.174	14674000	11758000	2916000	0	NaN	0	NaN	Q69YN4-3;Q69YN4;H0YBN5;Q69YN4-2;H0YB68;Q69YN4-4	Q69YN4-3;Q69YN4;H0YBN5;Q69YN4-2	Protein virilizer homolog	KIAA1429
NaN	NaN	NaN	NaN	NaN	NaN			2	2	2	9.2	9.2	9.2	22.746	1.8112	94652000	72958000	21693000	0	NaN	0	NaN	R4GMU7;Q6DKI1-2;Q6DKI1	R4GMU7;Q6DKI1-2;Q6DKI1	60S ribosomal protein L7-like 1	RPL7L1
NaN	NaN	NaN	NaN	NaN	NaN			1	1	1	3.1	3.1	3.1	32.121	1.9627	81529000	46530000	34999000	0	NaN	0	NaN	Q6N063-2	Q6N063-2
NaN	NaN	NaN	NaN	NaN	NaN			1	1	1	20.3	20.3	20.3	8.3796	2.279	4323400	0	4323400	0	NaN	0	NaN	Q9UDT1;Q6NTF9;Q6NTF9-2	Q9UDT1;Q6NTF9;Q6NTF9-2	Rhomboid domain-containing protein 2	WUGSC:H_RG122E10.2a;RHBDD2
NaN	NaN	NaN	NaN	NaN	NaN			1	1	1	7.4	7.4	7.4	44.255	17.361	21476000	14446000	7029900	0	NaN	0	NaN	Q6P6C2;Q6P6C2-1	Q6P6C2;Q6P6C2-1	RNA demethylase ALKBH5	ALKBH5
NaN	NaN	NaN	NaN	NaN	NaN			12	1	0	11.6	2.6	0	121.36	8.6439	40185000	22830000	17355000	0	NaN	0	NaN	Q6S8J3;A5A3E0	Q6S8J3;A5A3E0	POTE ankyrin domain family member E;POTE ankyrin domain family member F	POTEE;POTEF
NaN	NaN	NaN	NaN	NaN	NaN			1	1	1	3.4	3.4	3.4	40.834	2.4333	4542600	2954000	1588600	0	NaN	0	NaN	Q6UN15-4;Q6UN15-3;Q6UN15-5;Q6UN15	Q6UN15-4;Q6UN15-3;Q6UN15-5;Q6UN15	Pre-mRNA 3-end-processing factor FIP1	FIP1L1
NaN	NaN	NaN	NaN	NaN	NaN			1	1	1	2.6	2.6	2.6	62.7	2.0501	13393000	7754400	5639000	0	NaN	0	NaN	Q6UVY6-2;Q6UVY6	Q6UVY6-2;Q6UVY6	DBH-like monooxygenase protein 1	MOXD1
NaN	NaN	NaN	NaN	NaN	NaN			2	2	2	10.5	10.5	10.5	45.394	33.683	68088000	36054000	32034000	0	NaN	0	NaN	Q6YN16;Q6YN16-2	Q6YN16;Q6YN16-2	Hydroxysteroid dehydrogenase-like protein 2	HSDL2
NaN	NaN	NaN	NaN	NaN	NaN			1	1	1	3.2	3.2	3.2	34.078	1.8402	11451000	0	11451000	0	NaN	0	NaN	Q6ZT21-2;Q6ZT21	Q6ZT21-2;Q6ZT21	Transmembrane protein with metallophosphoesterase domain	TMPPE
NaN	NaN	NaN	NaN	NaN	NaN			3	3	3	2.4	2.4	2.4	199.07	4.1341	55833000	31350000	24483000	0	NaN	0	NaN	Q7KZ85;Q7KZ85-2;Q7KZ85-3	Q7KZ85	Transcription elongation factor SPT6	SUPT6H
NaN	NaN	NaN	NaN	NaN	NaN			1	1	1	14.1	14.1	14.1	20.772	16.805	93730000	11876000	81854000	0	NaN	0	NaN	Q7Z4R8	Q7Z4R8	UPF0669 protein C6orf120	C6orf120
NaN	NaN	NaN	NaN	NaN	NaN			2	2	2	7.9	7.9	7.9	29.469	3.3263	30236000	6404600	23832000	0	NaN	0	NaN	Q86T03;Q86T03-2;G3V5T5;H0YJ90	Q86T03;Q86T03-2;G3V5T5;H0YJ90	Type 1 phosphatidylinositol 4,5-bisphosphate 4-phosphatase	TMEM55B
NaN	NaN	NaN	NaN	NaN	NaN			2	2	2	5.7	5.7	5.7	52.07	2.7474	14469000	0	14469000	0	NaN	0	NaN	Q86UL3;E5RIA1;E5RHA6	Q86UL3;E5RIA1;E5RHA6	Glycerol-3-phosphate acyltransferase 4	AGPAT6
NaN	NaN	NaN	NaN	NaN	NaN			3	3	3	5.6	5.6	5.6	63.459	5.2969	13057000	0	13057000	0	NaN	0	NaN	Q86X55-1;Q86X55;Q86X55-2;K7EK20;K7EPK1;K7EQA8	Q86X55-1;Q86X55;Q86X55-2	Histone-arginine methyltransferase CARM1	CARM1
NaN	NaN	NaN	NaN	NaN	NaN			2	2	2	5.4	5.4	5.4	52.672	6.0078	73401000	47840000	25560000	0	NaN	0	NaN	Q8IUF8-4;Q8IUF8;D6RCB6;Q8IUF8-3;Q8IUF8-2	Q8IUF8-4;Q8IUF8;D6RCB6;Q8IUF8-3;Q8IUF8-2	Bifunctional lysine-specific demethylase and histidyl-hydroxylase MINA	MINA
NaN	NaN	NaN	NaN	NaN	NaN			1	1	1	4.3	4.3	4.3	37.072	3.9182	16441000	10841000	5600000	0	NaN	0	NaN	Q8IUH3-2;Q8IUH3-3;Q8IUH3	Q8IUH3-2;Q8IUH3-3;Q8IUH3	RNA-binding protein 45	RBM45
NaN	NaN	NaN	NaN	NaN	NaN			5	5	5	22.2	22.2	22.2	41.211	27.354	105020000	437220	104580000	0	NaN	0	NaN	Q8IXU6;E9PJD1;Q8IXU6-3;Q8IXU6-2;E9PKZ2;E9PRY2	Q8IXU6;E9PJD1;Q8IXU6-3;Q8IXU6-2	Solute carrier family 35 member F2	SLC35F2
NaN	NaN	NaN	NaN	NaN	NaN			2	2	2	4.2	4.2	4.2	67.618	8.2891	2913200	218700	2694500	0	NaN	0	NaN	Q8IZ07;H0YIN8	Q8IZ07;H0YIN8	Ankyrin repeat domain-containing protein 13A	ANKRD13A
NaN	NaN	NaN	NaN	NaN	NaN			3	3	3	3.5	3.5	3.5	110.26	6.3669	18738000	14179000	4559100	0	NaN	0	NaN	Q8N3X1;Q8N3X1-2	Q8N3X1;Q8N3X1-2	Formin-binding protein 4	FNBP4
NaN	NaN	NaN	NaN	NaN	NaN			2	2	2	19.7	19.7	19.7	15.396	7.6932	19884000	2791000	17094000	0	NaN	0	NaN	Q8N490-2	Q8N490-2
NaN	NaN	NaN	NaN	NaN	NaN			1	1	1	12.4	12.4	12.4	21.315	26.101	11433000	8346600	3086300	0	NaN	0	NaN	Q8N4T4-3;Q8N4T4-2;Q8N4T4-4;Q8N4T4	Q8N4T4-3;Q8N4T4-2;Q8N4T4-4;Q8N4T4	Rho guanine nucleotide exchange factor 39	ARHGEF39
NaN	NaN	NaN	NaN	NaN	NaN			3	3	3	11.7	11.7	11.7	17.631	2.7683	9082500	5362900	3719500	0	NaN	0	NaN	Q8N5L8	Q8N5L8	Ribonuclease P protein subunit p25-like protein	RPP25L
NaN	NaN	NaN	NaN	NaN	NaN			1	1	1	12.9	12.9	12.9	14.652	3.6333	29548000	0	29548000	0	NaN	0	NaN	Q8N8J7	Q8N8J7	Uncharacterized protein C4orf32	C4orf32
NaN	NaN	NaN	NaN	NaN	NaN			3	3	3	7.3	7.3	7.3	46.411	30.387	56623000	53173000	3449500	0	NaN	0	NaN	Q8ND56-3;Q8ND56-2;Q8ND56;I3L4Q1;K7EMZ9;A0A0G2JQ95;A0A096LP11	Q8ND56-3;Q8ND56-2;Q8ND56;I3L4Q1;K7EMZ9	Protein LSM14 homolog A	LSM14A
NaN	NaN	NaN	NaN	NaN	NaN			1	1	1	5.2	5.2	5.2	33.245	2.8574	11366000	8162300	3204000	0	NaN	0	NaN	Q8ND76-3;Q8ND76-2;Q8ND76	Q8ND76-3;Q8ND76-2;Q8ND76	Cyclin-Y	CCNY
NaN	NaN	NaN	NaN	NaN	NaN			2	2	2	10.3	10.3	10.3	35.25	9.6446	988280	874300	113980	0	NaN	0	NaN	Q8NEJ9-2;Q8NEJ9;G3V4G1	Q8NEJ9-2;Q8NEJ9;G3V4G1	Neuroguidin	NGDN
NaN	NaN	NaN	NaN	NaN	NaN			1	1	1	4.9	4.9	4.9	36.707	3.0724	6668700	6668700	0	0	NaN	0	NaN	Q8NFH4	Q8NFH4	Nucleoporin Nup37	NUP37
NaN	NaN	NaN	NaN	NaN	NaN			1	1	1	6.8	6.8	6.8	21.142	3.1473	2016700	1573500	443210	0	NaN	0	NaN	Q8NFH5-3;Q8NFH5-2;Q8NFH5	Q8NFH5-3;Q8NFH5-2;Q8NFH5	Nucleoporin NUP53	NUP35
NaN	NaN	NaN	NaN	NaN	NaN			1	1	1	8.1	8.1	8.1	33.863	6.4276	6026400	6026400	0	0	NaN	0	NaN	Q8NFV4-4;Q8NFV4	Q8NFV4-4;Q8NFV4	Alpha/beta hydrolase domain-containing protein 11	ABHD11
NaN	NaN	NaN	NaN	NaN	NaN			4	4	4	8.3	8.3	8.3	65.471	25.018	306610000	299050000	7561900	0	NaN	0	NaN	Q8NHP8;Q8NHP8-2	Q8NHP8;Q8NHP8-2	Putative phospholipase B-like 2;Putative phospholipase B-like 2 32 kDa form;Putative phospholipase B-like 2 45 kDa form	PLBD2
NaN	NaN	NaN	NaN	NaN	NaN			1	1	1	8.9	8.9	8.9	25.431	10.983	19875000	0	19875000	0	NaN	0	NaN	Q8TAA5	Q8TAA5	GrpE protein homolog 2, mitochondrial	GRPEL2
NaN	NaN	NaN	NaN	NaN	NaN			1	1	1	7.3	7.3	7.3	27.813	35.891	10994000	10994000	0	0	NaN	0	NaN	Q8TBE9	Q8TBE9	N-acylneuraminate-9-phosphatase	NANP
NaN	NaN	NaN	NaN	NaN	NaN			1	1	1	4.1	4.1	4.1	38.124	1.8645	6009600	1279400	4730300	0	NaN	0	NaN	Q8TBP6	Q8TBP6	Solute carrier family 25 member 40	SLC25A40
NaN	NaN	NaN	NaN	NaN	NaN			3	3	3	12.3	12.3	12.3	35.386	16.664	52988000	4238000	48750000	0	NaN	0	NaN	Q8TC12;G3V2G6;G3V234;Q8TC12-3;Q8TC12-2;H0YJ10;H0YIZ8;H0YJ46	Q8TC12;G3V2G6;G3V234;Q8TC12-3;Q8TC12-2	Retinol dehydrogenase 11	RDH11
NaN	NaN	NaN	NaN	NaN	NaN			1	1	1	6.2	6.2	6.2	18.947	1.9765	7474600	4565500	2909100	0	NaN	0	NaN	Q8WU90-2;Q8WU90	Q8WU90-2;Q8WU90	Zinc finger CCCH domain-containing protein 15	ZC3H15
NaN	NaN	NaN	NaN	NaN	NaN			1	1	1	7.1	7.1	7.1	20.874	5.4436	4747500	4747500	0	0	NaN	0	NaN	Q8WUX2	Q8WUX2	Putative glutathione-specific gamma-glutamylcyclotransferase 2	CHAC2
NaN	NaN	NaN	NaN	NaN	NaN			2	2	2	18.5	18.5	18.5	17.676	22.362	65920000	59177000	6742700	0	NaN	0	NaN	Q8WVJ2;E5RFP0	Q8WVJ2;E5RFP0	NudC domain-containing protein 2	NUDCD2
NaN	NaN	NaN	NaN	NaN	NaN			2	2	2	4.5	4.5	4.5	59.356	3.6753	42661000	10260000	32401000	0	NaN	0	NaN	Q8WVX9;E9PNW8	Q8WVX9;E9PNW8	Fatty acyl-CoA reductase 1	FAR1
NaN	NaN	NaN	NaN	NaN	NaN			1	1	1	9.7	9.7	9.7	23.128	33.054	72716000	72716000	0	0	NaN	0	NaN	Q8WW59	Q8WW59	SPRY domain-containing protein 4	SPRYD4
NaN	NaN	NaN	NaN	NaN	NaN			4	4	4	7.8	7.8	7.8	73.011	6.6584	147340000	50020000	97316000	0	NaN	0	NaN	Q8WWI5-3;Q8WWI5-2;Q8WWI5	Q8WWI5-3;Q8WWI5-2;Q8WWI5	Choline transporter-like protein 1	SLC44A1
NaN	NaN	NaN	NaN	NaN	NaN			1	1	1	35.1	35.1	35.1	6.2107	3.3068	0	0	0	0	NaN	0	NaN	Q8WXC6	Q8WXC6	Myeloma-overexpressed gene 2 protein	MYEOV2
NaN	NaN	NaN	NaN	NaN	NaN			2	2	2	9.6	9.6	9.6	26.973	4.1429	94133000	0	94133000	0	NaN	0	NaN	Q92506	Q92506	Estradiol 17-beta-dehydrogenase 8	HSD17B8
NaN	NaN	NaN	NaN	NaN	NaN			3	3	3	1.2	1.2	1.2	292.75	2.0671	16021000	4747800	11273000	0	NaN	0	NaN	Q92616	Q92616	Translational activator GCN1	GCN1L1
NaN	NaN	NaN	NaN	NaN	NaN			2	2	2	8	8	8	52.186	7.7887	20856000	6960700	13895000	0	NaN	0	NaN	Q92759;A0A0G2JHJ2	Q92759;A0A0G2JHJ2	General transcription factor IIH subunit 4	GTF2H4
NaN	NaN	NaN	NaN	NaN	NaN			1	1	1	3.5	3.5	3.5	32.153	2.392	615970000	615970000	0	0	NaN	0	NaN	Q92847-2;Q92847	Q92847-2;Q92847	Growth hormone secretagogue receptor type 1	GHSR
NaN	NaN	NaN	NaN	NaN	NaN			3	3	3	1.3	1.3	1.3	290.46	3.744	1785400000	1027100000	758330000	0	NaN	0	NaN	Q93008-1;Q93008;O00507-2;O00507	Q93008-1;Q93008	Probable ubiquitin carboxyl-terminal hydrolase FAF-X	USP9X
NaN	NaN	NaN	NaN	NaN	NaN			1	1	1	5.6	5.6	5.6	22.047	7.1097	105340000	9612400	95731000	0	NaN	0	NaN	Q969E2-2;Q969E2	Q969E2-2;Q969E2	Secretory carrier-associated membrane protein 4	SCAMP4
NaN	NaN	NaN	NaN	NaN	NaN			2	2	2	12.1	12.1	12.1	22.16	2.3781	3425300	373450	3051800	0	NaN	0	NaN	Q969X5-2;Q969X5	Q969X5-2;Q969X5	Endoplasmic reticulum-Golgi intermediate compartment protein 1	ERGIC1
NaN	NaN	NaN	NaN	NaN	NaN			3	3	3	6	6	6	70.737	4.4054	13166000	1282900	11883000	0	NaN	0	NaN	Q969Z0;Q969Z0-2;H7C4R5;C9IZN7	Q969Z0;Q969Z0-2	Protein TBRG4	TBRG4
NaN	NaN	NaN	NaN	NaN	NaN			4	1	0	13	3.4	0	46.598	2.2747	0	0	0	0	NaN	0	NaN	Q96AK3;Q6ICH2;A0A087WX48	Q96AK3;Q6ICH2	DNA dC->dU-editing enzyme APOBEC-3D	APOBEC3D;bK150C2.9
NaN	NaN	NaN	NaN	NaN	NaN			2	2	2	22.3	22.3	22.3	13.238	6.0084	11220000	239320	10981000	0	NaN	0	NaN	Q96D05;Q96D05-2;Q5VVH9	Q96D05;Q96D05-2;Q5VVH9	Uncharacterized protein C10orf35	C10orf35
NaN	NaN	NaN	NaN	NaN	NaN			2	2	2	13.9	13.9	13.9	28.048	49.991	52229000	52229000	0	0	NaN	0	NaN	Q96DG6	Q96DG6	Carboxymethylenebutenolidase homolog	CMBL
NaN	NaN	NaN	NaN	NaN	NaN			1	1	1	3.5	3.5	3.5	31.381	2.4453	30014000	20518000	9495800	0	NaN	0	NaN	Q96FX7	Q96FX7	tRNA (adenine(58)-N(1))-methyltransferase catalytic subunit TRMT61A	TRMT61A
NaN	NaN	NaN	NaN	NaN	NaN			1	1	1	4	4	4	54.854	16.181	25298000	16389000	8909200	0	NaN	0	NaN	Q96GA3	Q96GA3	Protein LTV1 homolog	LTV1
NaN	NaN	NaN	NaN	NaN	NaN			1	1	1	32.4	32.4	32.4	10.778	19.536	15565000	15565000	0	0	NaN	0	NaN	Q96H79-2;Q96H79	Q96H79-2;Q96H79	Zinc finger CCCH-type antiviral protein 1-like	ZC3HAV1L
NaN	NaN	NaN	NaN	NaN	NaN			1	1	1	3.9	3.9	3.9	41.894	13.517	9543300	5688100	3855300	0	NaN	0	NaN	Q96HR8-2;Q96HR8	Q96HR8-2;Q96HR8	H/ACA ribonucleoprotein complex non-core subunit NAF1	NAF1
NaN	NaN	NaN	NaN	NaN	NaN			1	1	1	2.4	2.4	2.4	61.64	4.7902	159670000	103380000	56286000	0	NaN	0	NaN	Q96I24	Q96I24	Far upstream element-binding protein 3	FUBP3
NaN	NaN	NaN	NaN	NaN	NaN			3	3	3	8.9	8.9	8.9	34.308	1.8815	146790000	92538000	54251000	0	NaN	0	NaN	Q96MG7	Q96MG7	Melanoma-associated antigen G1	NDNL2
NaN	NaN	NaN	NaN	NaN	NaN			1	1	1	0.7	0.7	0.7	221.67	2.4657	14112000	9251500	4860600	0	NaN	0	NaN	Q96PE2	Q96PE2	Rho guanine nucleotide exchange factor 17	ARHGEF17
NaN	NaN	NaN	NaN	NaN	NaN			2	2	2	3	3	3	99.057	2.5287	21706000	21641000	65062	0	NaN	0	NaN	Q96QC0	Q96QC0	Serine/threonine-protein phosphatase 1 regulatory subunit 10	PPP1R10
NaN	NaN	NaN	NaN	NaN	NaN			1	1	1	6.9	6.9	6.9	29.965	3.7426	0	0	0	0	NaN	0	NaN	Q99436	Q99436	Proteasome subunit beta type-7	PSMB7
NaN	NaN	NaN	NaN	NaN	NaN			1	1	1	6.2	6.2	6.2	42.007	3.1429	1770600	1770600	0	0	NaN	0	NaN	Q99538-3;Q99538-2;Q99538	Q99538-3;Q99538-2;Q99538	Legumain	LGMN
NaN	NaN	NaN	NaN	NaN	NaN			2	1	1	9.9	7.2	7.2	42.823	6.3634	6701600	6701600	0	0	NaN	0	NaN	Q99733;Q99733-2;H0YCI4	Q99733;Q99733-2;H0YCI4	Nucleosome assembly protein 1-like 4	NAP1L4
NaN	NaN	NaN	NaN	NaN	NaN			5	5	5	9.8	9.8	9.8	75.775	12.871	114840000	4057200	110780000	0	NaN	0	NaN	Q99805	Q99805	Transmembrane 9 superfamily member 2	TM9SF2
NaN	NaN	NaN	NaN	NaN	NaN			3	3	3	19.2	19.2	19.2	22.704	6.5486	73411000	64394000	9016700	0	NaN	0	NaN	Q9BRP8-2;Q9BRP8	Q9BRP8-2;Q9BRP8	Partner of Y14 and mago	WIBG
NaN	NaN	NaN	NaN	NaN	NaN			2	2	2	13.6	13.6	13.6	24.899	10.587	5727300	614480	5112800	0	NaN	0	NaN	Q9BT67;Q9BT67-2	Q9BT67;Q9BT67-2	NEDD4 family-interacting protein 1	NDFIP1
NaN	NaN	NaN	NaN	NaN	NaN			3	3	3	25.5	25.5	25.5	15.896	19.29	25462000	19750000	5712600	0	NaN	0	NaN	Q9BV86-2;Q9BV86;S4R344;S4R3J7	Q9BV86-2;Q9BV86	N-terminal Xaa-Pro-Lys N-methyltransferase 1;N-terminal Xaa-Pro-Lys N-methyltransferase 1, N-terminally processed	NTMT1
NaN	NaN	NaN	NaN	NaN	NaN			1	1	1	3.6	3.6	3.6	41.138	1.9206	6072200	2393000	3679200	0	NaN	0	NaN	Q9BVQ7-3;Q9BVQ7-2;Q9BVQ7	Q9BVQ7-3;Q9BVQ7-2;Q9BVQ7	Spermatogenesis-associated protein 5-like protein 1	SPATA5L1
NaN	NaN	NaN	NaN	NaN	NaN			2	2	1	3.5	3.5	1.4	81.035	4.7629	12126000	393640	11732000	0	NaN	0	NaN	Q9BW92;U3KQ50;U3KQG0;Q9BW92-2	Q9BW92;U3KQ50;U3KQG0;Q9BW92-2	Threonine--tRNA ligase, mitochondrial	TARS2
NaN	NaN	NaN	NaN	NaN	NaN			1	1	1	3.2	3.2	3.2	42.351	2.6234	17407000	12760000	4646600	0	NaN	0	NaN	Q9BXS6-7;Q9BXS6-3;Q9BXS6-5;Q9BXS6-2;Q9BXS6	Q9BXS6-7;Q9BXS6-3;Q9BXS6-5;Q9BXS6-2;Q9BXS6	Nucleolar and spindle-associated protein 1	NUSAP1
NaN	NaN	NaN	NaN	NaN	NaN			2	2	2	8	8	8	35.618	5.7177	6050800	6050800	0	0	NaN	0	NaN	Q9BYB4;C9JPQ6;Q9BYB4-2	Q9BYB4;C9JPQ6;Q9BYB4-2	Guanine nucleotide-binding protein subunit beta-like protein 1	GNB1L
NaN	NaN	NaN	NaN	NaN	NaN			2	2	2	1.2	1.2	1.2	294.65	3.374	28691000	15543000	13148000	0	NaN	0	NaN	Q9BYK8;Q9BYK8-2;Q9BYK8-4	Q9BYK8;Q9BYK8-2;Q9BYK8-4	Helicase with zinc finger domain 2	HELZ2
NaN	NaN	NaN	NaN	NaN	NaN			1	1	1	3.7	3.7	3.7	27.949	2.2177	28169000	20640000	7529300	0	NaN	0	NaN	Q9BZM4	Q9BZM4	NKG2D ligand 3	ULBP3
NaN	NaN	NaN	NaN	NaN	NaN			1	1	1	4.5	4.5	4.5	27.368	4.6561	86701000	56002000	30699000	0	NaN	0	NaN	Q9BZM5	Q9BZM5	NKG2D ligand 2	ULBP2
NaN	NaN	NaN	NaN	NaN	NaN			2	2	2	1.6	1.6	1.6	145.89	2.6845	20440000	15696000	4744500	0	NaN	0	NaN	Q9C0J8;C9J8B4;Q9C0J8-3	Q9C0J8;C9J8B4;Q9C0J8-3	pre-mRNA 3 end processing protein WDR33	WDR33
NaN	NaN	NaN	NaN	NaN	NaN			1	1	1	10	10	10	24.121	7.9234	17486000	17486000	0	0	NaN	0	NaN	Q9GZP4-2;Q9GZP4	Q9GZP4-2;Q9GZP4	PITH domain-containing protein 1	PITHD1
NaN	NaN	NaN	NaN	NaN	NaN			1	1	1	23.7	23.7	23.7	12.442	10.967	5300400	5300400	0	0	NaN	0	NaN	V9GYE8;Q9GZT4	V9GYE8;Q9GZT4	Serine racemase	SRR
NaN	NaN	NaN	NaN	NaN	NaN			20	1	1	24.4	1.4	1.4	70.03	1.9461	14036000	7120900	6914600	0	NaN	0	NaN	Q9H361	Q9H361	Polyadenylate-binding protein 3	PABPC3
NaN	NaN	NaN	NaN	NaN	NaN			2	2	2	4.5	4.5	4.5	71.085	2.8627	8135200	3873500	4261700	0	NaN	0	NaN	Q9H6W3;Q9H6W3-2	Q9H6W3;Q9H6W3-2	Bifunctional lysine-specific demethylase and histidyl-hydroxylase NO66	NO66
NaN	NaN	NaN	NaN	NaN	NaN			2	2	2	19	19	19	23.598	14.937	48392000	28678000	19714000	0	NaN	0	NaN	Q9HCN8	Q9HCN8	Stromal cell-derived factor 2-like protein 1	SDF2L1
NaN	NaN	NaN	NaN	NaN	NaN			3	3	3	9.9	9.9	9.9	36.426	4.498	56360000	17748000	38612000	0	NaN	0	NaN	Q9NPF4;G3V445	Q9NPF4	Probable tRNA N6-adenosine threonylcarbamoyltransferase	OSGEP
NaN	NaN	NaN	NaN	NaN	NaN			1	1	1	3.2	3.2	3.2	44.898	2.8224	6585200	4681800	1903400	0	NaN	0	NaN	Q9NRC8	Q9NRC8	NAD-dependent protein deacetylase sirtuin-7	SIRT7
NaN	NaN	NaN	NaN	NaN	NaN			3	3	3	17.7	17.7	17.7	25.299	5.79	19783000	17841000	1942300	0	NaN	0	NaN	Q9NRH1	Q9NRH1	Yae1 domain-containing protein 1	YAE1D1
NaN	NaN	NaN	NaN	NaN	NaN			2	2	2	10.4	10.4	10.4	35.776	7.4426	11169000	6176100	4992600	0	NaN	0	NaN	Q9NRN7;E9PNF3;E9PLW6	Q9NRN7;E9PNF3;E9PLW6	L-aminoadipate-semialdehyde dehydrogenase-phosphopantetheinyl transferase	AASDHPPT
NaN	NaN	NaN	NaN	NaN	NaN			2	2	2	14.2	14.2	14.2	22.826	2.9851	47450000	37209000	10241000	0	NaN	0	NaN	Q9NRW3	Q9NRW3	DNA dC->dU-editing enzyme APOBEC-3C	APOBEC3C
NaN	NaN	NaN	NaN	NaN	NaN			1	1	1	16.1	16.1	16.1	13.671	5.764	157110000	157110000	0	0	NaN	0	NaN	Q9NRX4-2;Q9NRX4	Q9NRX4-2;Q9NRX4	14 kDa phosphohistidine phosphatase	PHPT1
NaN	NaN	NaN	NaN	NaN	NaN			1	1	1	6.4	6.4	6.4	22.417	4.652	24355000	15698000	8657000	0	NaN	0	NaN	Q9NV56	Q9NV56	MRG/MORF4L-binding protein	MRGBP
NaN	NaN	NaN	NaN	NaN	NaN			1	1	1	3.4	3.4	3.4	65.572	6.0266	48164000	26367000	21797000	0	NaN	0	NaN	Q9NVN8	Q9NVN8	Guanine nucleotide-binding protein-like 3-like protein	GNL3L
NaN	NaN	NaN	NaN	NaN	NaN			1	1	1	5.5	5.5	5.5	20.419	2.0188	0	0	0	0	NaN	0	NaN	Q9NX76	Q9NX76	CKLF-like MARVEL transmembrane domain-containing protein 6	CMTM6
NaN	NaN	NaN	NaN	NaN	NaN			2	2	2	20.4	20.4	20.4	12.199	2.1728	10467000	2744800	7722600	0	NaN	0	NaN	Q9NZ45	Q9NZ45	CDGSH iron-sulfur domain-containing protein 1	CISD1
NaN	NaN	NaN	NaN	NaN	NaN			5	5	5	18.7	18.7	18.7	41.127	31.364	26087000	154040	25933000	0	NaN	0	NaN	Q9NZC7-2;Q9NZC7;Q9NZC7-3;Q9NZC7-5;A0A087WZG5;F5H3R5;Q9NZC7-7;Q9NZC7-6	Q9NZC7-2;Q9NZC7;Q9NZC7-3;Q9NZC7-5	WW domain-containing oxidoreductase	WWOX
NaN	NaN	NaN	NaN	NaN	NaN			1	1	1	9.6	9.6	9.6	15.892	4.1261	6271800	5522900	748940	0	NaN	0	NaN	Q9NZT1	Q9NZT1	Calmodulin-like protein 5	CALML5
NaN	NaN	NaN	NaN	NaN	NaN			2	2	2	43.6	43.6	43.6	6.2484	1.9873	16887000	7710100	9177000	0	NaN	0	NaN	Q9P0U1;B5MD00;A0A087WZY2;A6NIV2	Q9P0U1;B5MD00;A0A087WZY2;A6NIV2	Mitochondrial import receptor subunit TOM7 homolog	TOMM7
NaN	NaN	NaN	NaN	NaN	NaN			3	3	3	50.6	50.6	50.6	9.0564	43.011	158880000	158880000	0	0	NaN	0	NaN	Q9P1F3;Q5SZC9	Q9P1F3	Costars family protein ABRACL	ABRACL
NaN	NaN	NaN	NaN	NaN	NaN			2	2	2	12.3	12.3	12.3	22.151	6.9832	5521800	1093000	4428800	0	NaN	0	NaN	Q9UBI1;R4GN06;Q5T8Z1;R4GNF2;R4GN54;H0Y4E5;R4GMW6;H0Y4W0;H0Y6Z9;R4GMX3	Q9UBI1;R4GN06;Q5T8Z1;R4GNF2;R4GN54;H0Y4E5;R4GMW6;H0Y4W0;H0Y6Z9;R4GMX3	COMM domain-containing protein 3	COMMD3;COMMD3-BMI1
NaN	NaN	NaN	NaN	NaN	NaN			8	1	0	38	3.5	0	31.282	1.9181	25702000	6260100	19442000	0	NaN	0	NaN	Q9UBX3;Q9UBX3-2	Q9UBX3;Q9UBX3-2	Mitochondrial dicarboxylate carrier	SLC25A10
NaN	NaN	NaN	NaN	NaN	NaN			56	1	1	67.5	2	2	85.223	3.5257	1212600000	725970000	486590000	0	NaN	0	NaN	Q9UHB6-4;Q9UHB6-5;F8VTU2;F8VVQ7;J3QQM5;Q9BT23	Q9UHB6-4;Q9UHB6-5	LIM domain and actin-binding protein 1	LIMA1
NaN	NaN	NaN	NaN	NaN	NaN			1	1	1	4.1	4.1	4.1	66.107	36.282	26943000	26943000	0	0	NaN	0	NaN	Q9UHB9-4;Q9UHB9-2;Q9UHB9	Q9UHB9-4;Q9UHB9-2;Q9UHB9	Signal recognition particle subunit SRP68	SRP68
NaN	NaN	NaN	NaN	NaN	NaN			2	2	2	1.8	1.8	1.8	170.45	6.3357	1949300	1483200	466140	0	NaN	0	NaN	Q9UIG0-2;Q9UIG0	Q9UIG0-2;Q9UIG0	Tyrosine-protein kinase BAZ1B	BAZ1B
NaN	NaN	NaN	NaN	NaN	NaN			1	1	1	13.1	13.1	13.1	12.326	1.9358	6702100	4621700	2080400	0	NaN	0	NaN	Q9UJC5	Q9UJC5	SH3 domain-binding glutamic acid-rich-like protein 2	SH3BGRL2
NaN	NaN	NaN	NaN	NaN	NaN			2	2	2	12.4	12.4	12.4	24.347	9.9196	13251000	1201500	12050000	0	NaN	0	NaN	Q9UL25	Q9UL25	Ras-related protein Rab-21	RAB21
NaN	NaN	NaN	NaN	NaN	NaN			3	3	3	11.2	11.2	11.2	42.945	2.6021	450730000	394140000	56591000	0	NaN	0	NaN	Q9UNM6;Q9UNM6-2;J3KNQ3;A0A087WUL9;H0YD73;E9PL38	Q9UNM6;Q9UNM6-2;J3KNQ3;A0A087WUL9	26S proteasome non-ATPase regulatory subunit 13	PSMD13
NaN	NaN	NaN	NaN	NaN	NaN			6	6	6	6.2	6.2	6.2	141.54	4.5563	71603000	10708000	60895000	0	NaN	0	NaN	Q9UQE7	Q9UQE7	Structural maintenance of chromosomes protein 3	SMC3
NaN	NaN	NaN	NaN	NaN	NaN			2	2	2	9.1	9.1	9.1	38.242	3.375	200510000	42895000	157620000	0	NaN	0	NaN	Q9Y266	Q9Y266	Nuclear migration protein nudC	NUDC
NaN	NaN	NaN	NaN	NaN	NaN			1	1	1	13.7	13.7	13.7	20.538	2.8533	12479000	12479000	0	0	NaN	0	NaN	Q9Y2Q3-4;Q9Y2Q3-3;Q9Y2Q3;Q9Y2Q3-2	Q9Y2Q3-4;Q9Y2Q3-3;Q9Y2Q3;Q9Y2Q3-2	Glutathione S-transferase kappa 1	GSTK1
NaN	NaN	NaN	NaN	NaN	NaN			1	1	1	40	40	40	10.241	4.4968	4131000	4131000	0	0	NaN	0	NaN	Q9Y2Q5-3;Q9Y2Q5;Q9Y2Q5-2	Q9Y2Q5-3;Q9Y2Q5;Q9Y2Q5-2	Ragulator complex protein LAMTOR2	LAMTOR2
NaN	NaN	NaN	NaN	NaN	NaN			1	1	1	1.4	1.4	1.4	108.66	2.824	106100000	91615000	14489000	0	NaN	0	NaN	Q9Y2W1	Q9Y2W1	Thyroid hormone receptor-associated protein 3	THRAP3
NaN	NaN	NaN	NaN	NaN	NaN			2	2	2	7.7	7.7	7.7	43.206	13.155	85654000	38468000	47186000	0	NaN	0	NaN	Q9Y305-3;Q9Y305-2;Q9Y305;Q9Y305-4;C9J7L8	Q9Y305-3;Q9Y305-2;Q9Y305;Q9Y305-4;C9J7L8	Acyl-coenzyme A thioesterase 9, mitochondrial	ACOT9
NaN	NaN	NaN	NaN	NaN	NaN			2	2	2	17.5	17.5	17.5	31.307	54.956	15906000	15906000	0	0	NaN	0	NaN	Q9Y316-2;Q9Y316;B5MCI6;Q9Y316-3	Q9Y316-2;Q9Y316;B5MCI6;Q9Y316-3	Protein MEMO1	MEMO1
NaN	NaN	NaN	NaN	NaN	NaN			4	4	4	36	36	36	26.032	14.153	109610000	18437000	91172000	0	NaN	0	NaN	Q9Y3A3;B4DM50;S4R3N1;Q9Y3A3-2;Q9Y3A3-3	Q9Y3A3;B4DM50;S4R3N1;Q9Y3A3-2;Q9Y3A3-3	MOB-like protein phocein	MOB4;HSPE1-MOB4
NaN	NaN	NaN	NaN	NaN	NaN			1	1	1	3.9	3.9	3.9	31.484	2.1367	32041000	27328000	4713300	0	NaN	0	NaN	Q9Y3B9	Q9Y3B9	RRP15-like protein	RRP15
NaN	NaN	NaN	NaN	NaN	NaN			1	1	1	7.7	7.7	7.7	17.326	3.2261	37157000	23743000	13413000	0	NaN	0	NaN	Q9Y3E7-2;Q9Y3E7-4;Q9Y3E7;Q9Y3E7-3	Q9Y3E7-2;Q9Y3E7-4;Q9Y3E7;Q9Y3E7-3	Charged multivesicular body protein 3	CHMP3
NaN	NaN	NaN	NaN	NaN	NaN			2	2	2	5.3	5.3	5.3	51.976	9.757	84609000	30241000	54368000	0	NaN	0	NaN	Q9Y512	Q9Y512	Sorting and assembly machinery component 50 homolog	SAMM50
NaN	NaN	NaN	NaN	NaN	NaN			2	2	2	27.8	27.8	27.8	16.297	37.3	17697000	16929000	768300	0	NaN	0	NaN	Q9Y547;A6NIR2;X6R7Y7	Q9Y547;A6NIR2;X6R7Y7	Intraflagellar transport protein 25 homolog	HSPB11
NaN	NaN	NaN	NaN	NaN	NaN			2	2	2	2.4	2.4	2.4	101.27	2.5183	8167400	6454200	1713200	0	NaN	0	NaN	Q9Y5Q9;H7C143	Q9Y5Q9;H7C143	General transcription factor 3C polypeptide 3	GTF3C3
NaN	NaN	NaN	NaN	NaN	NaN			2	2	2	2.4	2.4	2.4	126.55	5.1418	5811700	3202000	2609700	0	NaN	0	NaN	Q9Y613;J3KTH7	Q9Y613;J3KTH7	FH1/FH2 domain-containing protein 1	FHOD1
NaN	NaN	NaN	NaN	NaN	NaN			1	1	1	6.8	6.8	6.8	35.188	2.8868	19249000	19249000	0	0	NaN	0	NaN	Q9Y617-2;Q9Y617	Q9Y617-2;Q9Y617	Phosphoserine aminotransferase	PSAT1
NaN	5.39619	NaN	NaN	NaN	NaN			3	3	3	16.5	16.5	16.5	26.352	5.5513	318100000	11305000	306800000	0	5.39619	0	NaN	Q15125;C9J719;C9JJ78	Q15125;C9J719;C9JJ78	3-beta-hydroxysteroid-Delta(8),Delta(7)-isomerase	EBP
NaN	NaN	4.79992	NaN	NaN	NaN			1	1	1	21.3	21.3	21.3	5.1578	2.5532	18857000	681780	18176000	0	4.79992	0	NaN	E9PP42;E9PNA8;E9PLH2;M0QYU9;M0R0R3;M0R2G5;B7WNH4;Q9BQ49	E9PP42;E9PNA8;E9PLH2;M0QYU9;M0R0R3;M0R2G5;B7WNH4;Q9BQ49	Small integral membrane protein 7	SMIM7
4.15769	NaN	5.40006	NaN	NaN	NaN			14	2	2	70.8	4	4	40.317	13.083	1283200000	44978000	1238200000	1.08465	4.77888	0	NaN	Q9NQC3-2;F8W914	Q9NQC3-2;F8W914	Reticulon-4;Reticulon	RTN4
NaN	NaN	4.69193	NaN	NaN	NaN			1	1	1	6.2	6.2	6.2	19.835	2.4722	38358000	1647300	36711000	0	4.69193	0	NaN	Q8N0U8	Q8N0U8	Vitamin K epoxide reductase complex subunit 1-like protein 1	VKORC1L1
NaN	3.76384	5.41596	NaN	NaN	NaN			3	3	3	45.1	45.1	45.1	5.8068	3.9463	277770000	32021000	245750000	0.945535	4.5899	0	NaN	Q5VTU8;P56381	Q5VTU8;P56381	ATP synthase subunit epsilon-like protein, mitochondrial;ATP synthase subunit epsilon, mitochondrial	ATP5EP2;ATP5E
NaN	4.33964	NaN	NaN	NaN	NaN			2	2	2	8.4	8.4	8.4	30.742	22.248	211170000	14248000	196920000	0	4.33964	0	NaN	A0A0A0MTI6;Q9NYP7;Q9NYP7-2;Q9NYP7-3	A0A0A0MTI6;Q9NYP7;Q9NYP7-2;Q9NYP7-3	Elongation of very long chain fatty acids protein;Elongation of very long chain fatty acids protein 5	ELOVL5
NaN	4.55287	3.88313	NaN	NaN	NaN			6	6	6	35	35	35	24.279	21.722	663560000	51101000	612460000	1.29726	4.218	0	NaN	Q9HAV7	Q9HAV7	GrpE protein homolog 1, mitochondrial	GRPEL1
NaN	NaN	4.15348	NaN	NaN	NaN			4	4	4	10.6	10.6	10.6	51.355	7.3909	67136000	7522100	59614000	0	4.15348	0	NaN	O43615;M0QXU7;M0QXM9	O43615;M0QXU7	Mitochondrial import inner membrane translocase subunit TIM44	TIMM44
NaN	NaN	4.07056	NaN	NaN	NaN			2	2	2	7.7	7.7	7.7	28.969	5.0895	26613000	2963200	23649000	0	4.07056	0	NaN	Q9BUB7;D4PHA6;Q9BUB7-3;Q9BUB7-2	Q9BUB7;D4PHA6;Q9BUB7-3;Q9BUB7-2	Transmembrane protein 70, mitochondrial	TMEM70
NaN	3.95624	NaN	NaN	NaN	NaN			3	3	3	11.4	11.4	11.4	30.162	13.228	241990000	9083100	232910000	0	3.95624	0	NaN	A0A075B6F6;Q8TCT9-5;Q8TCT9;Q8TCT9-4;Q8TCT9-2;A0A0C4DGU3	A0A075B6F6;Q8TCT9-5;Q8TCT9;Q8TCT9-4;Q8TCT9-2	Minor histocompatibility antigen H13	HM13
2.78184	NaN	5.01659	NaN	NaN	NaN			16	16	16	29.6	29.6	29.6	84.958	126.7	1033200000	41692000	991520000	0.750384	3.89921	0	NaN	O60934;A0A0C4DG07;E5RGU1;E5RGR7;A0A087X1V5;E2QRP0;E5RGN7	O60934;A0A0C4DG07	Nibrin	NBN
4.1254	3.43483	NaN	NaN	NaN	NaN			1	1	1	5.8	5.8	5.8	16.276	1.8254	9596200000	737920000	8858300000	1.23665	3.78012	0	NaN	Q5H8X8;O95399;O95399-2	Q5H8X8;O95399;O95399-2	Urotensin-2	UTS2
3.64939	NaN	NaN	NaN	NaN	NaN			5	5	5	20.6	20.6	20.6	33.269	20.304	167950000	10932000	157020000	0	3.64939	0	NaN	P49247	P49247	Ribose-5-phosphate isomerase	RPIA
NaN	NaN	3.43069	NaN	NaN	NaN			1	1	1	10.9	10.9	10.9	10.094	3.1353	32239000	4151100	28088000	0	3.43069	0	NaN	Q9P2X0;Q9P2X0-2	Q9P2X0;Q9P2X0-2	Dolichol-phosphate mannosyltransferase subunit 3	DPM3
NaN	3.40613	NaN	NaN	NaN	NaN			4	4	4	9.8	9.8	9.8	48.915	17.027	218530000	21485000	197040000	0	3.40613	0	NaN	J3KQL8;Q9BQE5;E9PM95	J3KQL8;Q9BQE5	Apolipoprotein L2	APOL2
NaN	2.67746	3.87823	NaN	NaN	NaN			7	7	7	24.5	24.5	24.5	42.033	12.93	225630000	39241000	186390000	0.938066	3.27785	0	NaN	Q9Y2S7;B4DEM9	Q9Y2S7;B4DEM9	Polymerase delta-interacting protein 2	POLDIP2
NaN	3.25927	NaN	NaN	NaN	NaN			2	2	2	13.7	13.7	13.7	23.51	95.362	134280000	88340000	45936000	0	3.25927	0	NaN	Q13257;Q13257-2	Q13257;Q13257-2	Mitotic spindle assembly checkpoint protein MAD2A	MAD2L1
NaN	3.25648	NaN	NaN	NaN	NaN			3	3	3	10	10	10	42.19	5.5767	200160000	33440000	166720000	0	3.25648	0	NaN	Q9H300;F8WCQ4;C9JNP8;Q9H300-2;H7C0U0	Q9H300;F8WCQ4;C9JNP8;Q9H300-2	Presenilins-associated rhomboid-like protein, mitochondrial;P-beta	PARL
NaN	3.24513	NaN	NaN	NaN	NaN			2	2	2	24.6	24.6	24.6	7.9331	2.0974	68275000	14444000	53832000	0	3.24513	0	NaN	P56385	P56385	ATP synthase subunit e, mitochondrial	ATP5I
NaN	3.17876	NaN	NaN	NaN	NaN			3	3	3	8.7	8.7	8.7	46.179	11.989	90486000	7114500	83372000	0	3.17876	0	NaN	Q16537-3;Q16537-2;Q16537;Q15173-2;Q15173	Q16537-3;Q16537-2;Q16537	Serine/threonine-protein phosphatase 2A 56 kDa regulatory subunit epsilon isoform	PPP2R5E
NaN	NaN	3.16113	NaN	NaN	NaN			3	3	3	7.7	7.7	7.7	55.01	5.2714	143720000	25479000	118240000	0	3.16113	0	NaN	Q01650;H0YJ95;A0A0C4DGL4;G3V4Z6;Q9UM01;Q92536	Q01650	Large neutral amino acids transporter small subunit 1	SLC7A5
NaN	NaN	3.12191	NaN	NaN	NaN			3	3	3	8.4	8.4	8.4	70.369	13.227	45214000	3702400	41512000	0	3.12191	0	NaN	Q7L775	Q7L775	EPM2A-interacting protein 1	EPM2AIP1
NaN	NaN	3.07998	NaN	NaN	NaN			3	3	3	22.9	22.9	22.9	13.291	11.877	26652000	6385900	20266000	0	3.07998	0	NaN	Q5RI15;Q5RI15-2	Q5RI15;Q5RI15-2	Cytochrome c oxidase protein 20 homolog	COX20
NaN	NaN	3.06747	NaN	NaN	NaN			4	4	4	19.9	19.9	19.9	31.444	15.17	54130000	19423000	34707000	0	3.06747	0	NaN	O75663;O75663-2	O75663;O75663-2	TIP41-like protein	TIPRL
NaN	5.45828	0.62854	NaN	NaN	NaN			5	5	5	10.9	10.9	10.9	72.54	23.057	206300000	49489000	156810000	0.369559	3.04341	0	NaN	A0A0C4DFM1;Q92544;F8WCN2;F2Z2L1	A0A0C4DFM1;Q92544	Transmembrane 9 superfamily member 4	TM9SF4
NaN	NaN	3.03656	NaN	NaN	NaN			1	1	1	6.8	6.8	6.8	16.185	2.2733	12907000	2831300	10076000	0	3.03656	0	NaN	P32320	P32320	Cytidine deaminase	CDA
NaN	NaN	3.02694	NaN	NaN	NaN			3	3	3	15.1	15.1	15.1	24.579	6.4723	20166000	3209400	16956000	0	3.02694	0	NaN	P00492	P00492	Hypoxanthine-guanine phosphoribosyltransferase	HPRT1
NaN	NaN	3.01146	NaN	NaN	NaN			4	4	4	20.3	20.3	20.3	34.893	9.5679	397910000	12432000	385470000	0	3.01146	0	NaN	P05026-2;P05026;V9GYR2	P05026-2;P05026;V9GYR2	Sodium/potassium-transporting ATPase subunit beta-1	ATP1B1
NaN	NaN	3.00371	NaN	NaN	NaN			3	3	3	19.5	19.5	19.5	38.274	28.5	162150000	35002000	127150000	0	3.00371	0	NaN	O95433;H0YJU2;G3V438;H0YJG7;O95433-2;H0YJ63	O95433;H0YJU2;G3V438;H0YJG7;O95433-2	Activator of 90 kDa heat shock protein ATPase homolog 1	AHSA1
NaN	2.98887	NaN	NaN	NaN	NaN			4	3	3	37.5	29.5	29.5	10.401	2.4569	22047000	2566500	19481000	0	2.98887	0	NaN	H3BSM5;P60520;H3BQ50	H3BSM5;P60520;H3BQ50	Gamma-aminobutyric acid receptor-associated protein-like 2	GABARAPL2
NaN	NaN	2.95606	NaN	NaN	NaN			3	3	3	11.6	11.6	11.6	30.292	4.1991	81987000	12413000	69575000	0	2.95606	0	NaN	K7EK00;Q96ND0;K7ERQ2;K7EPG9	K7EK00;Q96ND0;K7ERQ2	Protein FAM210A	FAM210A
NaN	NaN	2.92998	NaN	NaN	NaN			2	2	2	15.1	15.1	15.1	20.437	3.3565	42236000	7770900	34465000	0	2.92998	0	NaN	V9GYS0;O60830;O60830-2;V9GYU0	V9GYS0;O60830;O60830-2;V9GYU0	Mitochondrial import inner membrane translocase subunit Tim17-B	TIMM17B
NaN	NaN	2.81809	NaN	NaN	NaN			3	3	3	22.4	22.4	22.4	16.762	10.732	109630000	16400000	93229000	0	2.81809	0	NaN	I3L1K7;I3L4Z6;E7EQ34;O14653-3;O14653;O14653-2;I3L0K1;I3L3V4	I3L1K7;I3L4Z6;E7EQ34;O14653-3;O14653;O14653-2;I3L0K1	Golgi SNAP receptor complex member 2	GOSR2
3.21571	NaN	2.40904	NaN	NaN	NaN			6	6	6	22	22	22	44.875	26.59	242550000	30722000	211830000	1.04248	2.81237	0	NaN	Q9BTV4	Q9BTV4	Transmembrane protein 43	TMEM43
NaN	NaN	2.8117	NaN	NaN	NaN			3	3	3	11.9	11.9	11.9	28.487	4.389	209900000	61540000	148360000	0	2.8117	0	NaN	H0YF29;Q6P1X6-2;Q6P1X6	H0YF29;Q6P1X6-2;Q6P1X6	UPF0598 protein C8orf82	C8orf82
NaN	NaN	2.80223	NaN	NaN	NaN			2	2	2	3.5	3.5	3.5	67.55	3.7225	338560000	24531000	314030000	0	2.80223	0	NaN	H0YGW7;Q8NE71-2;Q8NE71;A0A0G2JIC2	H0YGW7;Q8NE71-2;Q8NE71;A0A0G2JIC2	ATP-binding cassette sub-family F member 1	ABCF1
2.8017	NaN	NaN	NaN	NaN	NaN			3	3	3	12.2	12.2	12.2	20.846	4.7563	276650000	52092000	224560000	0	2.8017	0	NaN	E9PS95;A0A0D9SEI9;A0A0D9SFE1;E9PJH7;Q9H1K4;Q9H936;K4DIB6;K4DIB3;K4DIB8;K4DIA8;A0A0D9SFA8;K4DIB0;K4DIA2;A0A0D9SG84;E9PI74;E9PQ36	E9PS95;A0A0D9SEI9;A0A0D9SFE1;E9PJH7;Q9H1K4;Q9H936;K4DIB6;K4DIB3;K4DIB8;K4DIA8	Mitochondrial glutamate carrier 2;Mitochondrial glutamate carrier 1	SLC25A22;SLC25A18
NaN	2.77442	NaN	NaN	NaN	NaN			1	1	1	8	8	8	20.161	3.15	14624000	3775400	10848000	0	2.77442	0	NaN	C9JA28;Q9UNL2;Q9UNL2-2	C9JA28;Q9UNL2;Q9UNL2-2	Translocon-associated protein subunit gamma	SSR3
NaN	NaN	2.7642	NaN	NaN	NaN			2	2	2	36.8	36.8	36.8	7.7412	3.3697	9243300	1242000	8001300	0	2.7642	0	NaN	P60059	P60059	Protein transport protein Sec61 subunit gamma	SEC61G
2.75994	NaN	NaN	NaN	NaN	NaN			1	1	1	21.7	21.7	21.7	8.8131	6.9096	104020000	22440000	81577000	0	2.75994	0	NaN	C9JAW5;C9JNU6;Q9Y241	C9JAW5;C9JNU6;Q9Y241	HIG1 domain family member 1A, mitochondrial	HIGD1A
NaN	NaN	2.66373	NaN	NaN	NaN			3	3	3	24	24	24	16.648	6.7965	40351000	7913200	32438000	0	2.66373	0	NaN	Q9UHV9	Q9UHV9	Prefoldin subunit 2	PFDN2
NaN	NaN	2.64409	NaN	NaN	NaN			2	2	2	8.9	8.9	8.9	27.277	25.034	133580000	20431000	113150000	0	2.64409	0	NaN	Q9BVK6	Q9BVK6	Transmembrane emp24 domain-containing protein 9	TMED9
NaN	NaN	2.60436	NaN	NaN	NaN			2	2	2	8.4	8.4	8.4	39.416	4.4565	210590000	42466000	168120000	0	2.60436	0	NaN	Q9BRP1	Q9BRP1	Programmed cell death protein 2-like	PDCD2L
NaN	NaN	2.57737	NaN	NaN	NaN			3	3	3	16.2	16.2	16.2	21.228	3.6346	120820000	24519000	96304000	0	2.57737	0	NaN	Q9HB71-3;Q9HB71	Q9HB71-3;Q9HB71	Calcyclin-binding protein	CACYBP
NaN	NaN	2.4598	NaN	NaN	NaN			1	1	1	14.1	14.1	14.1	8.4984	3.0517	31117000	7512100	23605000	0	2.4598	0	NaN	H0YLF3;F5H6I0;P61769	H0YLF3;F5H6I0;P61769	Beta-2-microglobulin;Beta-2-microglobulin form pI 5.3	B2M
NaN	NaN	2.42812	NaN	NaN	NaN			13	1	1	66.3	2.8	2.8	42.274	5.8253	237730000	6183400	231550000	0	2.42812	0	NaN	Q9NQC3-5;H7C106;A0A0U1RQR6	Q9NQC3-5	Reticulon-4	RTN4
NaN	NaN	2.37712	NaN	NaN	NaN			1	1	1	8.6	8.6	8.6	20.687	14.168	12449000	2799400	9649800	0	2.37712	0	NaN	E9PJ95;Q9P000-2;Q9P000	E9PJ95;Q9P000-2;Q9P000	COMM domain-containing protein 9	COMMD9
NaN	NaN	2.30448	NaN	NaN	NaN			4	4	4	15.8	15.8	15.8	42.41	24.185	158790000	34181000	124610000	0	2.30448	0	NaN	A0A087WZN1;O43837;A0A087X2E5;O43837-3;O43837-2;A0A0D9SG66	A0A087WZN1;O43837;A0A087X2E5;O43837-3;O43837-2;A0A0D9SG66	Isocitrate dehydrogenase [NAD] subunit, mitochondrial;Isocitrate dehydrogenase [NAD] subunit beta, mitochondrial	IDH3B
NaN	2.23824	NaN	NaN	NaN	NaN			4	4	4	11.6	11.6	11.6	54.489	5.5575	78471000	6417800	72053000	0	2.23824	0	NaN	Q9UBM7;E9PJ54;H0YE57;E9PM00;E9PRL8;E9PQ71;E9PIP9	Q9UBM7;E9PJ54;H0YE57;E9PM00	7-dehydrocholesterol reductase	DHCR7
2.41733	3.29656	0.975924	NaN	NaN	NaN			7	7	7	31.5	31.5	31.5	29.892	17.445	782250000	313720000	468530000	1.09155	2.22994	0	NaN	A0A0A0MQS1;Q53H96;Q53H96-2;B5MD87;F8WEI0	A0A0A0MQS1;Q53H96;Q53H96-2;B5MD87	Pyrroline-5-carboxylate reductase;Pyrroline-5-carboxylate reductase 3	PYCRL
NaN	2.18878	NaN	NaN	NaN	NaN			2	2	2	27.1	27.1	27.1	7.8423	2.2404	8107400	2204800	5902600	0	2.18878	0	NaN	F8WAS3;C9IZN5;A0A087X1G1;H7BYD0;Q16718-2;Q16718	F8WAS3;C9IZN5;A0A087X1G1;H7BYD0;Q16718-2;Q16718	NADH dehydrogenase [ubiquinone] 1 alpha subcomplex subunit 5	NDUFA5
NaN	1.97501	2.37226	NaN	NaN	NaN			6	6	6	18.8	18.8	18.8	36.034	11.224	280210000	78785000	201430000	1.23648	2.17363	0	NaN	Q9NZ01;M0QXM3;Q9NZ01-2;M0R3C3;M0R329;B4DR74	Q9NZ01	Very-long-chain enoyl-CoA reductase	TECR
NaN	NaN	2.13346	NaN	NaN	NaN			1	1	1	12.2	12.2	12.2	8.8779	3.1079	38944000	11331000	27614000	0	2.13346	0	NaN	A0A087WV46;C9JXA7;Q0VGL1	A0A087WV46;C9JXA7;Q0VGL1	Ragulator complex protein LAMTOR4;Ragulator complex protein LAMTOR4, N-terminally processed	LAMTOR4
NaN	2.13297	NaN	NaN	NaN	NaN			2	2	2	5.3	5.3	5.3	38.155	3.2312	39664000	8242000	31422000	0	2.13297	0	NaN	Q5T440	Q5T440	Putative transferase CAF17, mitochondrial	IBA57
NaN	NaN	2.12125	NaN	NaN	NaN			2	2	2	13.8	13.8	13.8	26.688	7.3589	183990000	50770000	133220000	0	2.12125	0	NaN	Q9UEU0;J3KMW2;G3V5I2;H0YJL5;H0YJJ5;Q9UEU0-2	Q9UEU0;J3KMW2;G3V5I2;H0YJL5;H0YJJ5;Q9UEU0-2	Vesicle transport through interaction with t-SNAREs homolog 1B	VTI1B
NaN	2.10041	NaN	NaN	NaN	NaN			2	2	2	17.5	17.5	17.5	21.778	6.7971	40030000	28463000	11567000	0	2.10041	0	NaN	F8VYN9;P40616-2;P40616;F8VP99;F8VP63	F8VYN9;P40616-2;P40616;F8VP99;F8VP63	ADP-ribosylation factor-like protein 1	ARL1
NaN	1.59316	2.46835	NaN	NaN	NaN			3	3	3	13.6	13.6	13.6	17.801	4.0057	292210000	159890000	132320000	0.869297	2.03076	0	NaN	A0A096LP10;Q9NP73-2;A0A096LNJ4;A0A087WX43;A0A096LNL2;D6RE84;A0A087WTT9;Q9NP73;A0A087WT15	A0A096LP10;Q9NP73-2;A0A096LNJ4;A0A087WX43;A0A096LNL2;D6RE84;A0A087WTT9;Q9NP73	Putative bifunctional UDP-N-acetylglucosamine transferase and deubiquitinase ALG13	ALG13
NaN	2.02981	NaN	NaN	NaN	NaN			2	2	2	7	7	7	41.522	3.226	97938000	23170000	74768000	0	2.02981	0	NaN	O00767	O00767	Acyl-CoA desaturase	SCD
NaN	1.99895	NaN	NaN	NaN	NaN			2	2	2	3.9	3.9	3.9	90.126	8.3998	20419000	4888300	15530000	0	1.99895	0	NaN	Q9NXE4-2;Q9NXE4;Q9NXE4-4;F8WF03;F2Z2I0;F2Z2W5;C9J647;H7C235;H7C2J2;H7C0W5;H7C1Q6;H7BXF4;B1PBA3;Q9NXE4-9;Q9NXE4-10;Q9NXE4-7;Q9NXE4-8;Q9NXE4-3;Q9NXE4-6	Q9NXE4-2;Q9NXE4;Q9NXE4-4;F8WF03;F2Z2I0;F2Z2W5;C9J647;H7C235;H7C2J2;H7C0W5;H7C1Q6;H7BXF4;B1PBA3;Q9NXE4-9;Q9NXE4-10;Q9NXE4-7;Q9NXE4-8;Q9NXE4-3;Q9NXE4-6	Sphingomyelin phosphodiesterase 4	SMPD4
1.96488	NaN	NaN	NaN	NaN	NaN			5	5	5	10	10	10	107.77	34.988	65918000	51910000	14008000	0	1.96488	0	NaN	P22102;P22102-2;F8WD69;C9JZG2;C9JKQ7;C9JBJ1;C9JTV6	P22102;P22102-2	Trifunctional purine biosynthetic protein adenosine-3;Phosphoribosylamine--glycine ligase;Phosphoribosylformylglycinamidine cyclo-ligase;Phosphoribosylglycinamide formyltransferase	GART
NaN	1.93028	NaN	NaN	NaN	NaN			4	4	4	22.1	22.1	22.1	22.461	4.5386	99905000	22419000	77487000	0	1.93028	0	NaN	Q9Y570-2;Q9Y570;Q9Y570-4;Q9Y570-3	Q9Y570-2;Q9Y570;Q9Y570-4	Protein phosphatase methylesterase 1	PPME1
NaN	NaN	1.89983	NaN	NaN	NaN			3	3	3	22.7	22.7	22.7	19.686	9.7819	143790000	47564000	96228000	0	1.89983	0	NaN	F6QUN3;H0Y4B0;O43414-3;O43414-2;O43414;F6UGJ8	F6QUN3;H0Y4B0;O43414-3;O43414-2;O43414;F6UGJ8	ERI1 exoribonuclease 3	ERI3
NaN	1.87354	NaN	NaN	NaN	NaN			1	1	1	11.9	11.9	11.9	11.354	2.4327	64295000	31301000	32994000	0	1.87354	0	NaN	Q3ZAQ7	Q3ZAQ7	Vacuolar ATPase assembly integral membrane protein VMA21	VMA21
NaN	1.799	NaN	NaN	NaN	NaN			3	3	1	3.6	3.6	1.1	109.68	8.0445	81354000	21504000	59850000	0	1.799	0	NaN	P33176	P33176	Kinesin-1 heavy chain	KIF5B
NaN	NaN	1.77053	NaN	NaN	NaN			2	2	2	10.1	10.1	10.1	21.231	3.2016	22318000	7515300	14803000	0	1.77053	0	NaN	A0A087WWM0;O43617-2;O43617;A0A087WYS5;A6NKE1	A0A087WWM0;O43617-2;O43617;A0A087WYS5;A6NKE1	Trafficking protein particle complex subunit 3	TRAPPC3
1.75493	NaN	NaN	NaN	NaN	NaN			6	2	2	17.1	7.6	7.6	56.298	21.077	140820000	35622000	105200000	0	1.75493	0	NaN	D6R938;E9PBG7;E9PF82;Q13557-8;Q13557-12;Q13557-9;Q13557-10;Q13557-5;Q13557;Q13557-3;Q13557-6;Q13557-4;Q13557-11;H0Y9C2;H0Y9J2	D6R938;E9PBG7;E9PF82;Q13557-8;Q13557-12;Q13557-9;Q13557-10;Q13557-5;Q13557;Q13557-3;Q13557-6;Q13557-4;Q13557-11;H0Y9C2	Calcium/calmodulin-dependent protein kinase type II subunit delta	CAMK2D
NaN	NaN	1.71787	NaN	NaN	NaN			1	1	1	4	4	4	45.348	5.6941	29139000	8514200	20624000	0	1.71787	0	NaN	Q9H5Q4	Q9H5Q4	Dimethyladenosine transferase 2, mitochondrial	TFB2M
1.71458	NaN	NaN	NaN	NaN	NaN			3	3	3	17.7	17.7	17.7	39.34	11.075	216660000	80098000	136560000	0	1.71458	0	NaN	H3BQN4;J3KPS3;P04075;P04075-2;H3BR04;H3BPS8;H3BR68;H3BMQ8;H3BUH7;H3BU78	H3BQN4;J3KPS3;P04075;P04075-2;H3BR04;H3BPS8	Fructose-bisphosphate aldolase;Fructose-bisphosphate aldolase A	ALDOA
1.6906	NaN	NaN	NaN	NaN	NaN			2	2	2	2.2	2.2	2.2	108.27	3.6383	31414000	7983800	23431000	0	1.6906	0	NaN	P29317;J3KR66;Q96L35;B1AKC9;E9PG71;A0A0B4J1T8;Q9UF33-2;Q9UF33-3;P54762-5;P54764-2;P54762;P54764;P29323-2;P54760;P29323-3;Q15375-2;Q15375-4;Q15375;P54753;Q9UF33;P29323	P29317;J3KR66;Q96L35;B1AKC9;E9PG71;A0A0B4J1T8;Q9UF33-2;Q9UF33-3;P54762-5;P54764-2;P54762;P54764;P29323-2;P54760;P29323-3;Q15375-2;Q15375-4;Q15375;P54753;Q9UF33;P29323	Ephrin type-A receptor 2;Receptor protein-tyrosine kinase;Ephrin type-A receptor 6;Ephrin type-B receptor 1;Ephrin type-A receptor 4;Ephrin type-B receptor 2;Ephrin type-B receptor 4;Ephrin type-A receptor 7;Ephrin type-B receptor 3	EPHA2;EPHA6;EPHB4;EPHB2;EPHA4;EPHB1;EPHA7;EPHB3
NaN	NaN	1.64579	NaN	NaN	NaN			3	3	3	19.7	19.7	19.7	18.998	6.2709	33088000	11164000	21924000	0	1.64579	0	NaN	P51571;A6NLM8	P51571;A6NLM8	Translocon-associated protein subunit delta	SSR4
NaN	1.78409	1.49968	NaN	NaN	NaN			2	2	2	24.1	24.1	24.1	12.274	6.9854	76192000	26759000	49433000	1.25964	1.64188	0	NaN	P62877	P62877	E3 ubiquitin-protein ligase RBX1;E3 ubiquitin-protein ligase RBX1, N-terminally processed	RBX1
NaN	NaN	1.60426	NaN	NaN	NaN			4	4	4	11.2	11.2	11.2	48.633	10.007	524110000	103990000	420120000	0	1.60426	0	NaN	Q8NEF9	Q8NEF9	Serum response factor-binding protein 1	SRFBP1
NaN	NaN	1.56189	NaN	NaN	NaN			5	5	5	23.7	23.7	23.7	21.539	7.4302	53390000	18714000	34676000	0	1.56189	0	NaN	Q9NVJ2;Q9NVJ2-2;Q96BM9	Q9NVJ2	ADP-ribosylation factor-like protein 8B	ARL8B
1.54972	NaN	NaN	NaN	NaN	NaN			4	4	4	14.2	14.2	14.2	39.648	15.815	196900000	40073000	156830000	0	1.54972	0	NaN	Q96EE3;Q96EE3-1;K7ELV2;K7ENI5	Q96EE3;Q96EE3-1;K7ELV2	Nucleoporin SEH1	SEH1L
NaN	NaN	1.54023	NaN	NaN	NaN			2	2	2	24.2	24.2	24.2	10.079	4.2087	37509000	15796000	21713000	0	1.54023	0	NaN	Q96DA6-2;Q96DA6	Q96DA6-2;Q96DA6	Mitochondrial import inner membrane translocase subunit TIM14	DNAJC19
NaN	NaN	1.53978	NaN	NaN	NaN			6	2	2	44.4	15.6	15.6	20.529	10.57	98327000	81268000	17059000	0	1.53978	0	NaN	P84085;C9J1Z8	P84085;C9J1Z8	ADP-ribosylation factor 5	ARF5
NaN	NaN	1.51304	NaN	NaN	NaN			5	5	5	19.4	19.4	19.4	46.44	22.529	125690000	36870000	88822000	0	1.51304	0	NaN	P50454;E9PKH2;H0YEP8;E9PNX1;E9PK86;E9PMI5;E9PR70;E9PPV6;E9PQ34;E9PJH8;E9PIG2;E9PRS3	P50454;E9PKH2	Serpin H1	SERPINH1
NaN	NaN	1.51111	NaN	NaN	NaN			3	3	3	11.3	11.3	11.3	40.836	26.642	73091000	22155000	50936000	0	1.51111	0	NaN	A0A087WXC5;E7ESZ7;O95299;O95299-2;Q8N1B9;C9J6X0;H7C2W5;H7C1Y7;H7C2X4	A0A087WXC5;E7ESZ7;O95299;O95299-2;Q8N1B9;C9J6X0	NADH dehydrogenase [ubiquinone] 1 alpha subcomplex subunit 10, mitochondrial	NDUFA10
NaN	NaN	1.5099	NaN	NaN	NaN			3	3	3	10.5	10.5	10.5	36.724	12.782	107460000	43755000	63701000	0	1.5099	0	NaN	Q9BQA1;H0Y711;Q9BQA1-2	Q9BQA1;H0Y711;Q9BQA1-2	Methylosome protein 50	WDR77
NaN	NaN	1.50919	NaN	NaN	NaN			10	5	5	15.9	8.1	8.1	74.761	4.4453	55357000	11070000	44287000	0	1.50919	0	NaN	O75746;O75746-2;F8W9J0;H0YFB2;B4DGK6	O75746;O75746-2	Calcium-binding mitochondrial carrier protein Aralar1	SLC25A12
NaN	NaN	1.45449	NaN	NaN	NaN			2	2	2	12.2	12.2	12.2	16.817	1.9158	48334000	17374000	30960000	0	1.45449	0	NaN	A0A087WY85;P61077;P61077-2;P61077-3;D6R9F6;D6R933;D6RGD0;D6R980;D6RAW0;D6RIZ3;D6RA11;D6RFM0;D6RAH7;H9KV45;A0A0A0MQU3;P62837-2;P62837	A0A087WY85;P61077;P61077-2;P61077-3;D6R9F6;D6R933;D6RGD0;D6R980;D6RAW0;D6RIZ3;D6RA11;D6RFM0;D6RAH7;H9KV45;A0A0A0MQU3;P62837-2;P62837	Ubiquitin-conjugating enzyme E2 D3;Ubiquitin-conjugating enzyme E2 D2	UBE2D3;UBE2D2
1.56243	NaN	1.31562	NaN	NaN	NaN			4	4	4	50.4	50.4	50.4	12.897	33.434	109900000	66281000	43622000	1.26393	1.43902	0	NaN	P30044-4;P30044-2;P30044-3;P30044	P30044-4;P30044-2;P30044-3;P30044	Peroxiredoxin-5, mitochondrial	PRDX5
NaN	1.28924	NaN	NaN	NaN	NaN			4	2	2	2.2	1.3	1.3	229.56	4.0969	30730000	12540000	18190000	0	1.28924	0	NaN	Q96HP0;K7ESB7	Q96HP0;K7ESB7	Dedicator of cytokinesis protein 6	DOCK6
-0.0774063	4.09677	-0.169777	NaN	NaN	NaN			5	4	4	22.4	19.1	19.1	31.263	16.336	1747600000	188940000	1558600000	0.33909	1.28319	0	NaN	Q13243;B4DJK0;B4DUA4;Q13243-3;G3V5K8;Q13243-2	Q13243;B4DJK0;B4DUA4;Q13243-3	Serine/arginine-rich splicing factor 5	SRSF5
NaN	NaN	1.26376	NaN	NaN	NaN			3	3	3	18	18	18	21.58	4.5568	31437000	13905000	17532000	0	1.26376	0	NaN	Q5JR08;P61586;P08134;Q5JR06;Q5JR07;E9PN11;C9JNR4;E9PQH6;C9JX21;Q5JR05;U3KQA9;U3KQV3;P62745;E9PLA2;C9JRM1	Q5JR08;P61586;P08134;Q5JR06;Q5JR07;E9PN11;C9JNR4;E9PQH6;C9JX21;Q5JR05;U3KQA9;U3KQV3;P62745	Transforming protein RhoA;Rho-related GTP-binding protein RhoC;Rho-related GTP-binding protein RhoB	RHOC;RHOA;RHOB
NaN	1.5472	0.927517	NaN	NaN	NaN			3	3	3	8	8	8	47.285	6.2146	163710000	84130000	79580000	0.806314	1.23736	0	NaN	E9PNM1;P37268-4;P37268-3;P37268-2;P37268;P37268-5;E9PS69;E9PJG4	E9PNM1;P37268-4;P37268-3;P37268-2;P37268;P37268-5	Squalene synthase	FDFT1
2.59884	NaN	-0.183015	NaN	NaN	NaN			3	3	3	28.6	28.6	28.6	12.254	5.4391	305210000	118410000	186800000	0.263796	1.20791	0	NaN	Q9Y3U8;J3QSB5;J3KTD3	Q9Y3U8;J3QSB5	60S ribosomal protein L36	RPL36
NaN	NaN	1.18998	NaN	NaN	NaN			3	3	3	27.7	27.7	27.7	15.395	6.2362	25449000	14521000	10928000	0	1.18998	0	NaN	A0A0C4DGL3;H0YNW5;H0YKC5;P33316-2;P33316;H0YMM5;H0YNJ9;H0YKI0;H0YMP1	A0A0C4DGL3;H0YNW5;H0YKC5;P33316-2;P33316;H0YMM5;H0YNJ9;H0YKI0	Deoxyuridine 5-triphosphate nucleotidohydrolase, mitochondrial	DUT
NaN	NaN	1.17409	NaN	NaN	NaN			3	3	3	7.4	7.4	7.4	53.262	4.95	51951000	23800000	28151000	0	1.17409	0	NaN	Q7L3T8	Q7L3T8	Probable proline--tRNA ligase, mitochondrial	PARS2
NaN	0.63812	1.68746	NaN	NaN	NaN			2	2	2	5.9	5.9	5.9	48.08	4.8332	89650000	29816000	59833000	0.568892	1.16279	0	NaN	P84022;H0YMP2;H0YL71;H3BP09;H3BVD1;K7EJX0;B7Z5N5;P84022-3;P84022-2;O15198-2;Q15796-2;Q15796;O15198	P84022;H0YMP2;H0YL71;H3BP09;H3BVD1;K7EJX0;B7Z5N5;P84022-3;P84022-2;O15198-2;Q15796-2;Q15796;O15198	Mothers against decapentaplegic homolog 3;Mothers against decapentaplegic homolog;Mothers against decapentaplegic homolog 9;Mothers against decapentaplegic homolog 2	SMAD3;SMAD2;SMAD9
NaN	0.920903	1.39736	NaN	NaN	NaN			2	2	2	8.4	8.4	8.4	34.358	4.6358	233200000	78839000	154370000	0.889261	1.15913	0	NaN	Q96E29-3;Q96E29-2;Q96E29;E5RIY4;E5RIK9	Q96E29-3;Q96E29-2;Q96E29;E5RIY4;E5RIK9	Transcription termination factor 3, mitochondrial	MTERF3
NaN	NaN	1.13777	NaN	NaN	NaN			2	2	2	10.7	10.7	10.7	23.567	6.9732	104340000	43488000	60855000	0	1.13777	0	NaN	P11233;H7C3P7;P11234;P11234-3;P11234-2	P11233;H7C3P7;P11234;P11234-3;P11234-2	Ras-related protein Ral-A;Ras-related protein Ral-B	RALA;RALB
NaN	1.1177	NaN	NaN	NaN	NaN			3	3	3	55.2	55.2	55.2	6.8417	84.605	266210000	260010000	6202600	0	1.1177	0	NaN	Q9H3K6-2;Q9H3K6;H3BV85;H3BTW0;A0A0B4J295;A0A087WZT3;H3BVE0	Q9H3K6-2;Q9H3K6;H3BV85;H3BTW0;A0A0B4J295;A0A087WZT3;H3BVE0	BolA-like protein 2	BOLA2;BOLA2B
NaN	NaN	1.1165	NaN	NaN	NaN			3	3	2	16.3	16.3	11.8	30.213	8.9454	64108000	30881000	33226000	0	1.1165	0	NaN	E2QRB3;P32322-2;P32322;J3QR88;J3QLK9;J3QL32;J3QL24;J3QKT4;J3KQ22;P32322-3;J3KTA8;J3QKT3;J3QRZ0;J3QL23	E2QRB3;P32322-2;P32322;J3QR88;J3QLK9;J3QL32;J3QL24;J3QKT4;J3KQ22;P32322-3	Pyrroline-5-carboxylate reductase 1, mitochondrial;Pyrroline-5-carboxylate reductase	PYCR1
NaN	1.32556	0.833902	NaN	NaN	NaN			4	4	4	50.6	50.6	50.6	9.9601	7.399	99443000	47369000	52075000	0.846144	1.07973	0	NaN	E5RHG8;Q15369;R4GMY8;Q15369-2	E5RHG8;Q15369;R4GMY8;Q15369-2	Transcription elongation factor B polypeptide 1	TCEB1
1.22836	NaN	0.862511	NaN	NaN	NaN			5	5	5	17.6	17.6	17.6	36.177	15.962	134960000	53869000	81095000	0.957522	1.04543	0	NaN	Q8NBS9-2;Q8NBS9	Q8NBS9-2;Q8NBS9	Thioredoxin domain-containing protein 5	TXNDC5
NaN	NaN	1.0054	NaN	NaN	NaN			3	3	3	15.5	15.5	15.5	26.694	10.32	350480000	129730000	220750000	0	1.0054	0	NaN	C9JRZ6;Q9NX63;F8WAR4;F8WD73	C9JRZ6;Q9NX63;F8WAR4	MICOS complex subunit MIC19	CHCHD3
1.18104	0.867817	0.916018	NaN	NaN	NaN			5	5	5	6.9	6.9	6.9	109.13	18.675	828310000	452790000	375520000	2.01916	0.988291	0	NaN	Q96H55;Q96H55-3;Q96H55-4;Q96H55-2;A0A087WYT7;A0A087WZQ9;A0A087WU55;B4DSL5;A0A087WY49	Q96H55;Q96H55-3;Q96H55-4	Unconventional myosin-XIX	MYO19
NaN	NaN	0.973354	NaN	NaN	NaN			1	1	1	4.9	4.9	4.9	35.867	9.1684	19895000	9641700	10253000	0	0.973354	0	NaN	Q9UET6-2;Q9UET6	Q9UET6-2;Q9UET6	Putative tRNA (cytidine(32)/guanosine(34)-2-O)-methyltransferase	FTSJ1
NaN	0.86576	1.05956	NaN	NaN	NaN			3	3	3	3.6	3.6	3.6	106.21	7.2266	197860000	87501000	110360000	1.19472	0.962662	0	NaN	O94851-5;O94851-6;O94851-4;O94851-3;O94851;O94851-2;E9PJB0;E9PRE0;E9PL42;E9PNC3;E9PKI3;J3KSK6;Q7RTP6-2;Q7RTP6-4;Q7RTP6-3;Q7RTP6-5;Q7RTP6	O94851-5;O94851-6;O94851-4;O94851-3;O94851;O94851-2	Protein-methionine sulfoxide oxidase MICAL2	MICAL2
NaN	NaN	0.955387	NaN	NaN	NaN			3	3	3	2.9	2.9	2.9	118.38	4.0132	19024000	6900000	12124000	0	0.955387	0	NaN	H0Y8E4;E9PH70;Q9ULH0-3;Q9ULH0-2;Q9ULH0-4;Q9ULH0	H0Y8E4;E9PH70;Q9ULH0-3;Q9ULH0-2;Q9ULH0-4;Q9ULH0	Kinase D-interacting substrate of 220 kDa	KIDINS220
NaN	0.939828	0.925392	NaN	NaN	NaN	+		3	3	3	15.6	15.6	15.6	26.736	7.3126	58524000	27688000	30836000	2.30739	0.93261	0	NaN	F8VW96;Q16527;F8VQR7	F8VW96;Q16527;F8VQR7	Cysteine and glycine-rich protein 2	CSRP2
NaN	NaN	0.926683	NaN	NaN	NaN			2	2	2	25.3	25.3	25.3	10.688	6.5594	23283000	12581000	10703000	0	0.926683	0	NaN	A0A075B746;P82921	A0A075B746;P82921	28S ribosomal protein S21, mitochondrial	MRPS21
0.894604	0.987612	0.885262	NaN	NaN	NaN	+		8	7	7	27.3	21.1	21.1	41.569	19.937	649410000	285880000	363530000	2.90241	0.922493	0	NaN	Q92747;Q92747-2;E9PF58	Q92747;Q92747-2;E9PF58	Actin-related protein 2/3 complex subunit 1A	ARPC1A
1.12439	1.04705	0.595217	NaN	NaN	NaN			4	4	4	39.7	39.7	39.7	7.3184	8.671	319010000	159150000	159860000	1.51487	0.92222	0	NaN	P63218	P63218	Guanine nucleotide-binding protein G(I)/G(S)/G(O) subunit gamma-5	GNG5
NaN	NaN	0.918005	NaN	NaN	NaN			2	2	2	8.4	8.4	8.4	30.281	2.8877	55596000	24483000	31113000	0	0.918005	0	NaN	Q9H0E2;E9PNS3;F2Z2Y8;E7EN89	Q9H0E2;E9PNS3;F2Z2Y8;E7EN89	Toll-interacting protein	TOLLIP
1.06046	0.972766	0.718088	NaN	NaN	NaN			4	4	4	20.8	20.8	20.8	36.876	36.904	399050000	156540000	242510000	1.90995	0.917105	0	NaN	Q14257;Q14257-2;A8MXP8;H0YL43	Q14257;Q14257-2;A8MXP8	Reticulocalbin-2	RCN2
0.853277	1.1121	0.768925	NaN	NaN	NaN			12	12	12	28.8	28.8	28.8	57.466	94.189	2405000000	1049600000	1355400000	1.89997	0.911434	0	NaN	Q14247-3;Q14247;Q14247-2;H0YCD9	Q14247-3;Q14247;Q14247-2	Src substrate cortactin	CTTN
NaN	NaN	0.90458	NaN	NaN	NaN			2	2	2	5.1	5.1	5.1	75.981	5.9055	42734000	18166000	24568000	0	0.90458	0	NaN	Q96TA2-3;Q96TA2-2;Q96TA2;Q96I63	Q96TA2-3;Q96TA2-2;Q96TA2;Q96I63	ATP-dependent zinc metalloprotease YME1L1	YME1L1
0.655169	0.957915	1.08583	NaN	NaN	NaN			5	5	5	22.1	22.1	22.1	42.613	39.108	375390000	174270000	201130000	1.7087	0.899639	0	NaN	P61163;R4GMT0;P42025	P61163;R4GMT0	Alpha-centractin	ACTR1A
NaN	1.55925	0.23952	NaN	NaN	NaN			8	2	2	18.4	4.5	4.5	44.348	36.849	347250000	191110000	156130000	0.394732	0.899384	0	NaN	Q58FF8	Q58FF8	Putative heat shock protein HSP 90-beta 2	HSP90AB2P
0.891419	NaN	NaN	NaN	NaN	NaN			2	2	2	6.7	6.7	6.7	44.41	11.069	148310000	50691000	97618000	0	0.891419	0	NaN	Q86Y07-4;Q86Y07-5;Q86Y07-2;Q86Y07-3;Q86Y07	Q86Y07-4;Q86Y07-5;Q86Y07-2;Q86Y07-3;Q86Y07	Serine/threonine-protein kinase VRK2	VRK2
NaN	0.879392	NaN	NaN	NaN	NaN			3	3	3	15.1	15.1	15.1	48.357	14.403	204840000	89241000	115590000	0	0.879392	0	NaN	Q05048;A0A0A0MSZ9	Q05048;A0A0A0MSZ9	Cleavage stimulation factor subunit 1	CSTF1
NaN	NaN	0.876959	NaN	NaN	NaN			2	2	2	6.1	6.1	6.1	27.423	2.6073	81092000	40309000	40783000	0	0.876959	0	NaN	Q9UI43;E9PGN6	Q9UI43;E9PGN6	rRNA methyltransferase 2, mitochondrial	FTSJ2
1.37167	0.777956	0.472696	NaN	NaN	NaN			5	5	5	10.6	10.6	10.6	57.116	14.597	437880000	207070000	230810000	1.0951	0.874107	0	NaN	P07237;H7BZ94;I3L398;H0Y3Z3;I3L4M2;I3NI03;I3L312;I3L3P5;I3L3U6	P07237;H7BZ94;I3L398;H0Y3Z3	Protein disulfide-isomerase	P4HB
-0.169696	1.34216	1.42734	NaN	NaN	NaN			6	6	6	42.9	42.9	42.9	11.737	26.399	726280000	600360000	125920000	0.625705	0.8666	0	NaN	P10599;P10599-2	P10599;P10599-2	Thioredoxin	TXN
1.08542	NaN	0.645978	NaN	NaN	NaN			2	2	2	9.9	9.9	9.9	31.972	8.1991	63413000	30318000	33095000	0.800687	0.865701	0	NaN	F8W733;Q9NXR7-4;Q9NXR7-3;Q9NXR7;Q9NXR7-1;C9J2G0	F8W733;Q9NXR7-4;Q9NXR7-3;Q9NXR7;Q9NXR7-1;C9J2G0	BRCA1-A complex subunit BRE	BRE
NaN	NaN	0.860844	NaN	NaN	NaN			4	4	4	35.9	35.9	35.9	15.947	12.132	76790000	34978000	41813000	0	0.860844	0	NaN	Q6P1L8	Q6P1L8	39S ribosomal protein L14, mitochondrial	MRPL14
0.726744	1.2386	0.613249	NaN	NaN	NaN			7	7	7	23.6	23.6	23.6	33.419	14.304	383610000	186900000	196710000	1.33157	0.859532	0	NaN	Q9P015;E5RIZ4;E5RHF4	Q9P015;E5RIZ4;E5RHF4	39S ribosomal protein L15, mitochondrial	MRPL15
NaN	NaN	0.857583	NaN	NaN	NaN			2	2	2	4.9	4.9	4.9	46.8	2.6131	73001000	33590000	39411000	0	0.857583	0	NaN	Q4G148-2;Q4G148	Q4G148-2;Q4G148	Glucoside xylosyltransferase 1	GXYLT1
0.728574	1.16266	0.649845	NaN	NaN	NaN			3	3	3	15.1	15.1	15.1	34.352	8.2197	164080000	72652000	91425000	1.47294	0.847027	0	NaN	Q12904;Q12904-2;D6R937	Q12904;Q12904-2	Aminoacyl tRNA synthase complex-interacting multifunctional protein 1;Endothelial monocyte-activating polypeptide 2	AIMP1
0.837701	0.725872	0.92448	NaN	NaN	NaN	+		7	7	7	22.8	22.8	22.8	37.567	16.895	959020000	686520000	272500000	2.32148	0.829351	0	NaN	P48729-3;P48729;D6REM4;P48729-2;E7ETM0;Q8N752;U3KPX3;H0Y9X2;U3KQK7;U3KQ83;E5RG27;D6RGE5	P48729-3;P48729;D6REM4;P48729-2;E7ETM0;Q8N752	Casein kinase I isoform alpha;Casein kinase I isoform alpha-like	CSNK1A1;CSNK1A1L
NaN	0.982583	0.66948	NaN	NaN	NaN			2	2	2	6.6	6.6	6.6	40.917	2.8885	65831000	30022000	35809000	0.923581	0.826032	0	NaN	F5H442;Q99816;J3QRU6;J3QKS4;Q99816-2	F5H442;Q99816;J3QRU6;J3QKS4;Q99816-2	Tumor susceptibility gene 101 protein	TSG101
0.810073	NaN	NaN	NaN	NaN	NaN			2	2	2	5.9	5.9	5.9	52.904	4.408	37318000	13173000	24146000	0	0.810073	0	NaN	O00232;O00232-2	O00232;O00232-2	26S proteasome non-ATPase regulatory subunit 12	PSMD12
0.656908	0.932968	0.799916	NaN	NaN	NaN			9	7	7	7	5.9	5.9	179.48	24.253	118250000	41115000	77135000	2.00593	0.796598	0	NaN	F2Z2E2;Q86VI3	F2Z2E2;Q86VI3	Ras GTPase-activating-like protein IQGAP3	IQGAP3
0.741489	0.883621	0.762136	NaN	NaN	NaN	+		3	3	3	15.6	15.6	15.6	21.905	5.9445	114820000	54897000	59921000	2.51	0.795749	0	NaN	J3KS15;Q14197	J3KS15;Q14197	Peptidyl-tRNA hydrolase ICT1, mitochondrial	ICT1
0.395172	1.0916	0.884481	NaN	NaN	NaN			4	4	4	12.8	12.8	12.8	53.198	24.459	166080000	73689000	92392000	1.20789	0.790417	0	NaN	Q9Y2Z4;H0YHS6	Q9Y2Z4;H0YHS6	Tyrosine--tRNA ligase, mitochondrial;Tyrosine--tRNA ligase	YARS2
1.47794	0.0663992	NaN	NaN	NaN	NaN			3	3	3	11	11	11	27.091	3.2905	182490000	40003000	142480000	0.326594	0.772168	0	NaN	E7ENR5;H0Y714;Q96G21;B9A008;B8ZZ47	E7ENR5;H0Y714;Q96G21;B9A008	U3 small nucleolar ribonucleoprotein protein IMP4	IMP4
NaN	0.706022	0.835762	NaN	NaN	NaN			5	5	5	57	57	57	12.122	11.389	205590000	94524000	111070000	1.27209	0.770892	0	NaN	Q9GZT3-2;Q9GZT3;A0A087WUN7;H0YJ40;G3V4X6;G3V2S9;H0YJW7;H0YJI1;H0YJ07;H0YJU7	Q9GZT3-2;Q9GZT3;A0A087WUN7;H0YJ40;G3V4X6;G3V2S9;H0YJW7	SRA stem-loop-interacting RNA-binding protein, mitochondrial	SLIRP
NaN	NaN	0.762731	NaN	NaN	NaN			3	3	3	15.5	15.5	15.5	27.295	11.525	62982000	43040000	19943000	0	0.762731	0	NaN	A2IDA3;P29372-5;P29372-4;P29372-2;P29372	A2IDA3;P29372-5;P29372-4;P29372-2;P29372	DNA-3-methyladenine glycosylase	MPG
0.688046	0.853756	0.720366	NaN	NaN	NaN	+		9	9	9	36.3	36.3	36.3	33.535	23.108	693120000	340500000	352620000	2.34746	0.754056	0	NaN	P49406;S4R3W9;A0A0A0MRF4;S4R455;H7C2J0	P49406;S4R3W9	39S ribosomal protein L19, mitochondrial	MRPL19
NaN	NaN	0.737773	NaN	NaN	NaN			2	2	2	14.2	14.2	14.2	15.578	2.9602	32126000	14890000	17236000	0	0.737773	0	NaN	Q7Z5G4-3;Q7Z5G4	Q7Z5G4-3;Q7Z5G4	Golgin subfamily A member 7	GOLGA7
0.430071	0.901803	0.858856	NaN	NaN	NaN			5	5	5	8.6	8.6	8.6	85.479	27.906	521830000	236330000	285500000	1.39798	0.730244	0	NaN	Q9Y2J4-3;Q9Y2J4;Q9Y2J4-2;Q9Y2J4-4;D6RIC7;D6RBK2;D6RJA4;D6RF61;D6RCL7	Q9Y2J4-3;Q9Y2J4;Q9Y2J4-2;Q9Y2J4-4	Angiomotin-like protein 2	AMOTL2
NaN	0.683472	0.71264	NaN	NaN	NaN			4	4	4	40	40	40	13.746	6.2035	82655000	40942000	41713000	1.8762	0.698056	0	NaN	Q7Z2W9-2;Q7Z2W9;H3BUY0	Q7Z2W9-2;Q7Z2W9;H3BUY0	39S ribosomal protein L21, mitochondrial	MRPL21
NaN	NaN	0.686613	NaN	NaN	NaN			3	3	3	11.1	11.1	11.1	41.213	10.539	61438000	26544000	34894000	0	0.686613	0	NaN	P19784;H3BSA1;H3BV19	P19784;H3BSA1	Casein kinase II subunit alpha	CSNK2A2
0.390998	0.879	0.771209	NaN	NaN	NaN			14	2	1	20.5	4.5	1.2	72.572	7.3348	76971000	35958000	41013000	1.35451	0.680402	0	NaN	Q5T9A4;Q5T9A4-3	Q5T9A4;Q5T9A4-3	ATPase family AAA domain-containing protein 3B	ATAD3B
NaN	NaN	0.673195	NaN	NaN	NaN			2	2	2	14.9	14.9	14.9	18.215	7.951	64562000	40296000	24266000	0	0.673195	0	NaN	E9PQM0;Q8WUK0-2;Q8WUK0-3;Q8WUK0	E9PQM0;Q8WUK0-2;Q8WUK0-3;Q8WUK0	Phosphatidylglycerophosphatase and protein-tyrosine phosphatase 1	PTPMT1
NaN	0.669753	NaN	NaN	NaN	NaN			1	1	1	3.4	3.4	3.4	27.676	2.1766	65417000	25353000	40064000	0	0.669753	0	NaN	Q13425-2;Q13425	Q13425-2;Q13425	Beta-2-syntrophin	SNTB2
0.857901	NaN	0.480989	NaN	NaN	NaN			1	1	1	11.6	11.6	11.6	15.736	6.2593	102240000	53465000	48772000	0.757721	0.669445	0	NaN	P27449	P27449	V-type proton ATPase 16 kDa proteolipid subunit	ATP6V0C
NaN	NaN	0.650305	NaN	NaN	NaN			2	2	2	13.4	13.4	13.4	24.752	5.0167	35902000	18082000	17820000	0	0.650305	0	NaN	Q86UY6-3;Q86UY6;F5H2C9;Q86UY6-4	Q86UY6-3;Q86UY6;F5H2C9;Q86UY6-4	N-alpha-acetyltransferase 40	NAA40
NaN	NaN	0.64441	NaN	NaN	NaN			2	2	2	30.1	30.1	30.1	13.491	16.433	133390000	67502000	65886000	0	0.64441	0	NaN	F8WC38;A0A087X1N3;O75818-2;O75818;X6RLL4	F8WC38;A0A087X1N3;O75818-2;O75818;X6RLL4	Ribonuclease P protein subunit p40	RPP40
NaN	0.672018	0.616734	NaN	NaN	NaN			2	2	2	15.2	15.2	15.2	15.365	3.869	95292000	49155000	46136000	1.56396	0.644376	0	NaN	E9PPC8;E9PK68;Q08209-3;Q08209-2;Q08209;H0YB02;G3V111;E7ETC2;Q5F2F8;Q08209-4;Q08209-5;P48454-2;P48454;P16298-2;P16298-3;P48454-3;P16298;P16298-4	E9PPC8;E9PK68;Q08209-3;Q08209-2;Q08209;H0YB02;G3V111;E7ETC2;Q5F2F8;Q08209-4;Q08209-5;P48454-2;P48454;P16298-2;P16298-3;P48454-3;P16298;P16298-4	Serine/threonine-protein phosphatase;Serine/threonine-protein phosphatase 2B catalytic subunit alpha isoform;Serine/threonine-protein phosphatase 2B catalytic subunit gamma isoform;Serine/threonine-protein phosphatase 2B catalytic subunit beta isoform	PPP3CA;PPP3CC;PPP3CB
0.577731	0.777956	0.544584	NaN	NaN	NaN			8	8	8	21.8	21.8	21.8	56.084	43.486	332970000	184570000	148400000	1.8865	0.633424	0	NaN	Q9P258	Q9P258	Protein RCC2	RCC2
-0.802361	1.01243	1.64201	NaN	NaN	NaN			9	9	9	38.1	38.1	38.1	16.118	323.31	3371700000	3312900000	58795000	0.311409	0.617358	0	NaN	I3L397;I3L504;P63241;P63241-2;F8WCJ1;C9J7B5;C9J4W5;Q9GZV4;Q6IS14	I3L397;I3L504;P63241;P63241-2	Eukaryotic translation initiation factor 5A;Eukaryotic translation initiation factor 5A-1	EIF5A
0.680234	NaN	0.545968	NaN	NaN	NaN			5	5	5	40.7	40.7	40.7	13.133	2.9641	39495000	19629000	19866000	1.15844	0.613101	0	NaN	Q15370;Q15370-2;B8ZZU8;I3L0M9;A0A0B4J296	Q15370;Q15370-2;B8ZZU8;I3L0M9;A0A0B4J296	Transcription elongation factor B polypeptide 2	TCEB2
NaN	0.933799	0.259303	NaN	NaN	NaN			3	3	1	16.4	16.4	4.9	20.745	4.566	87018000	42320000	44697000	0.484703	0.596551	0	NaN	Q9Y3L5;F6U784;P10114;A0A087X2C3	Q9Y3L5;F6U784;P10114	Ras-related protein Rap-2c;Ras-related protein Rap-2a	RAP2C;RAP2A
0.318114	NaN	0.872001	NaN	NaN	NaN			4	4	4	10	10	10	45.935	3.6383	279150000	135590000	143560000	0.557041	0.595058	0	NaN	E9PF19;Q9Y4P3;Q96E41;A0A087WXC6;F8WDI9;F8WCR3	E9PF19;Q9Y4P3;Q96E41;A0A087WXC6;F8WDI9	Transducin beta-like protein 2	TBL2
0.754802	0.469469	0.560421	NaN	NaN	NaN			8	8	8	24.2	24.2	24.2	45.098	97.27	701840000	342710000	359130000	1.71155	0.594898	0	NaN	P09543-2;P09543;K7EN66;C9K0L8;K7ERZ0;K7ERC4	P09543-2;P09543	2,3-cyclic-nucleotide 3-phosphodiesterase	CNP
-0.39741	1.13093	1.04663	NaN	NaN	NaN			3	3	1	2.2	2.2	0.8	122.46	2.7878	1926100000	368800000	1557300000	0.450814	0.593384	0	NaN	E7EW33;H7C229;E7EVJ5;Q96F07-2;Q96F07;A0A087X0D6;A0A0G2JR96;A0A0G2JQT1;A0A0G2JQH3;A0A087WVZ5	E7EW33;H7C229;E7EVJ5;Q96F07-2;Q96F07;A0A087X0D6;A0A0G2JR96;A0A0G2JQT1	Cytoplasmic FMR1-interacting protein 2	CYFIP2
NaN	NaN	0.590913	NaN	NaN	NaN			2	2	2	9.5	9.5	9.5	38.893	20.406	87606000	45555000	42051000	0	0.590913	0	NaN	A0A087WV52;Q9NP92	A0A087WV52;Q9NP92	28S ribosomal protein S30, mitochondrial	MRPS30
0.650305	0.385818	0.682393	NaN	NaN	NaN			7	7	7	28.1	28.1	28.1	40.47	16.813	528360000	292320000	236050000	1.58721	0.572839	0	NaN	H0Y9G6;E7ETU7;P09001;D6RC14;E9PF06;D6RBQ5	H0Y9G6;E7ETU7;P09001;D6RC14;E9PF06	39S ribosomal protein L3, mitochondrial	MRPL3
NaN	0.578601	0.563549	NaN	NaN	NaN			3	3	3	20.3	20.3	20.3	15.173	5.5692	185150000	99862000	85292000	2.07628	0.571075	0	NaN	O15235	O15235	28S ribosomal protein S12, mitochondrial	MRPS12
NaN	0.564134	NaN	NaN	NaN	NaN			2	2	2	2	2	2	136.68	5.0267	21442000	10848000	10594000	0	0.564134	0	NaN	Q9BZH6	Q9BZH6	WD repeat-containing protein 11	WDR11
0.582845	0.755229	0.348459	NaN	NaN	NaN			14	14	14	52.1	52.1	52.1	26.697	80.943	6790500000	3719900000	3070600000	1.38443	0.562178	0	NaN	Q96C19;H0Y4Y4;A0A087X1Z2;Q9BUP0-2;Q9BUP0;C9JTV4;Q8WYH2	Q96C19	EF-hand domain-containing protein D2	EFHD2
0.51662	0.59579	0.541614	NaN	NaN	NaN	+		6	6	6	45.6	45.6	45.6	14.226	13.172	494410000	266400000	228010000	2.74684	0.551341	0	NaN	P82932	P82932	28S ribosomal protein S6, mitochondrial	MRPS6
0.734135	0.445621	0.46999	NaN	NaN	NaN			4	4	4	34.3	34.3	34.3	15.345	14.142	233990000	126390000	107600000	1.56738	0.549915	0	NaN	Q9Y3D3;A6ND22;Q9Y3D3-2	Q9Y3D3;A6ND22;Q9Y3D3-2	28S ribosomal protein S16, mitochondrial	MRPS16
0.190425	0.649569	0.74123	NaN	NaN	NaN			5	5	5	3.6	3.6	3.6	193.1	16.262	204760000	106520000	98237000	1.04316	0.527075	0	NaN	Q9H792;H3BUZ5;H0YN99	Q9H792	Pseudopodium-enriched atypical kinase 1	PEAK1
0.5655	0.506094	0.500802	NaN	NaN	NaN	+		16	16	16	54.9	54.9	54.9	36.805	136.34	4431700000	2343000000	2088800000	2.80627	0.524132	0	NaN	G5E9W7;G5E9V5;P82650;H7C5F2;H7C5H3;P82650-2;H7C5L9;C9J5D8	G5E9W7;G5E9V5;P82650;H7C5F2;H7C5H3;P82650-2	28S ribosomal protein S22, mitochondrial	MRPS22
NaN	NaN	0.520146	NaN	NaN	NaN			2	2	2	5.1	5.1	5.1	81.749	6.5427	80049000	39424000	40625000	0	0.520146	0	NaN	Q8TED9-2;Q8TED9;Q8TED9-3;Q8TED9-4	Q8TED9-2;Q8TED9;Q8TED9-3;Q8TED9-4	Actin filament-associated protein 1-like 1	AFAP1L1
NaN	NaN	0.518535	NaN	NaN	NaN			2	2	2	8.7	8.7	8.7	29.485	9.1213	199050000	96826000	102230000	0	0.518535	0	NaN	H0Y4J2;A6NHR2;S4R369;Q9BZE1	H0Y4J2;A6NHR2;S4R369;Q9BZE1	39S ribosomal protein L37, mitochondrial	MRPL37
NaN	NaN	0.518434	NaN	NaN	NaN			4	4	4	20.8	20.8	20.8	20.692	5.8075	47072000	28703000	18369000	0	0.518434	0	NaN	Q9BYD1;E5RJI7;E5RFI2;H0YAX3	Q9BYD1;E5RJI7;E5RFI2	39S ribosomal protein L13, mitochondrial	MRPL13
NaN	0.511569	NaN	NaN	NaN	NaN			2	2	2	12.5	12.5	12.5	19.443	4.3209	18925000	11147000	7777800	0	0.511569	0	NaN	Q01658	Q01658	Protein Dr1	DR1
NaN	0.506805	NaN	NaN	NaN	NaN			12	1	1	15	0.9	0.9	110.86	2.2145	1997100000	1114900000	882250000	0	0.506805	0	NaN	B1AKY9;P50993	B1AKY9;P50993	Sodium/potassium-transporting ATPase subunit alpha-2	ATP1A2
0.502229	NaN	NaN	NaN	NaN	NaN			3	3	3	16.9	16.9	16.9	22.999	2.4701	18784000	11204000	7580100	0	0.502229	0	NaN	P82664	P82664	28S ribosomal protein S10, mitochondrial	MRPS10
0.268913	0.469261	0.76511	NaN	NaN	NaN			22	11	11	10.7	6.5	6.5	268.31	40.946	832100000	614130000	217970000	1.13257	0.501095	0	NaN	O15020-2;O15020;A4QPE4	O15020-2;O15020;A4QPE4	Spectrin beta chain, non-erythrocytic 2	SPTBN2
NaN	0.514703	0.480989	NaN	NaN	NaN			4	4	4	26.4	26.4	26.4	18.529	17.709	165870000	90396000	75472000	1.6666	0.497846	0	NaN	A6NJD9;A8MVT4;A8MYK1;Q16540;H7C2P7	A6NJD9;A8MVT4;A8MYK1;Q16540;H7C2P7	39S ribosomal protein L23, mitochondrial	MRPL23
0.496513	NaN	NaN	NaN	NaN	NaN			3	3	3	0.8	0.8	0.8	506.37	3.3548	213560000	191760000	21794000	0	0.496513	0	NaN	A0A087WVP1;Q14517	A0A087WVP1;Q14517	Protocadherin Fat 1;Protocadherin Fat 1, nuclear form	FAT1
0.656817	0.397474	0.423417	NaN	NaN	NaN			3	3	3	15	15	15	20.576	5.8361	217370000	120240000	97128000	1.57021	0.492569	0	NaN	Q9H0U6	Q9H0U6	39S ribosomal protein L18, mitochondrial	MRPL18
NaN	NaN	0.488824	NaN	NaN	NaN			2	2	2	19.4	19.4	19.4	10.474	3.5185	55699000	31952000	23747000	0	0.488824	0	NaN	D6RAN8;H7C5U8;Q9P0M9	D6RAN8;H7C5U8;Q9P0M9	39S ribosomal protein L27, mitochondrial	MRPL27
0.435202	0.53436	NaN	NaN	NaN	NaN			2	2	1	4.3	4.3	2.1	48.586	1.8593	166180000	76961000	89216000	1.18787	0.484781	0	NaN	U3KQA5;A0A0U1RQT7;Q8IXA3;A0A0U1RQY7;U3KQB3;Q9HCP0-2;Q9HCP0;A0A0U1RR31;A0A0U1RQG9;A0A0U1RQK6;A0A087WWF5;K7ESB6;Q9Y6M4-5;Q9Y6M4-3;Q9Y6M4;Q9Y6M4-2	U3KQA5;A0A0U1RQT7;Q8IXA3;A0A0U1RQY7;U3KQB3;Q9HCP0-2;Q9HCP0;A0A0U1RR31;A0A0U1RQG9;A0A0U1RQK6;A0A087WWF5;K7ESB6;Q9Y6M4-5;Q9Y6M4-3;Q9Y6M4;Q9Y6M4-2	Casein kinase I isoform gamma-1;Casein kinase I isoform gamma-3	hCG_2004507;CSNK1G1;CSNK1G2;CSNK1G3
0.624335	0.42094	0.405557	NaN	NaN	NaN			8	8	8	28.3	28.3	28.3	40.085	25.867	1195900000	632030000	563830000	1.68617	0.483611	0	NaN	Q96HE9;J3QR53;J3QQS2;J3QRE1;J3QKY4	Q96HE9	Proline-rich protein 11	PRR11
0.493135	0.54201	0.413052	NaN	NaN	NaN	+		10	10	10	37.3	37.3	37.3	37.535	36.36	446290000	239330000	206950000	2.22123	0.482733	0	NaN	Q9H9J2	Q9H9J2	39S ribosomal protein L44, mitochondrial	MRPL44
0.512884	0.301588	0.626112	NaN	NaN	NaN			13	13	9	33.5	33.5	24.4	57.796	80.675	1605200000	826160000	779060000	1.43117	0.480195	0	NaN	Q5SWX3;A0A0A0MS52;Q13555-10;Q13555-5;Q13555-4;A0A0A0MT11;Q13555-3;Q13555-7;Q13555-9;Q13555-2;Q13555-8;Q13555;Q13555-6;Q8WU40;H0Y6G2;Q13554-7;Q13554-4;Q13554-6;Q13554-3;Q13554-8;Q13554-5;Q13554-2;Q13554;H7BXS4;Q9UQM7;Q9UQM7-2;E9PBE8;E7EQE4;H7BZC6;D6RHX9;D6RFJ0;E7ERS6;E7ETC9;H7C394	Q5SWX3;A0A0A0MS52;Q13555-10;Q13555-5;Q13555-4;A0A0A0MT11;Q13555-3;Q13555-7;Q13555-9;Q13555-2;Q13555-8;Q13555;Q13555-6;Q8WU40;H0Y6G2	Calcium/calmodulin-dependent protein kinase type II subunit gamma	CAMK2G
0.511468	0.485324	0.443501	NaN	NaN	NaN	+		5	5	5	33.1	33.1	33.1	19.198	25.944	91386000	50056000	41329000	2.77071	0.480097	0	NaN	Q13405;H0YDP7;E9PNF1;E9PI78	Q13405;H0YDP7	39S ribosomal protein L49, mitochondrial	MRPL49
0.448584	0.542605	0.439251	NaN	NaN	NaN	+		7	5	5	31.7	24.4	24.4	28.218	15.628	241970000	128060000	113910000	2.32262	0.476813	0	NaN	Q04917;A2IDB2;F8WEB6;A2IDB1	Q04917;A2IDB2	14-3-3 protein eta	YWHAH
0.493135	0.502942	0.433173	NaN	NaN	NaN	+		6	6	6	29.7	29.7	29.7	36.844	47.981	483440000	277270000	206170000	2.68017	0.476417	0	NaN	P82673;H0YG82;P82673-2	P82673;H0YG82;P82673-2	28S ribosomal protein S35, mitochondrial	MRPS35
0.556699	0.333309	0.533364	NaN	NaN	NaN			10	10	9	4	4	3.8	394.46	35.952	419340000	180650000	238690000	1.66542	0.474457	0	NaN	P46939;P46939-2;P46939-4;Q5T097;A0A0D9SG57;A0A0A0MSM3;Q4G0X0	P46939;P46939-2	Utrophin	UTRN
NaN	0.921589	0.0136409	NaN	NaN	NaN			4	4	4	19.9	19.9	19.9	27.067	12.649	525330000	385330000	140000000	0.309292	0.467615	0	NaN	Q9UNE7-2;Q9UNE7;H3BTA3;H3BS86;H3BUD0	Q9UNE7-2;Q9UNE7;H3BTA3;H3BS86	E3 ubiquitin-protein ligase CHIP	STUB1
0.530171	0.490365	0.369941	NaN	NaN	NaN			7	7	7	43.9	43.9	43.9	20.843	51.639	935550000	526860000	408680000	1.97356	0.463492	0	NaN	Q9Y2Q9;H0YAT2;H7C5V3;E5RGC7;E5RFH3;E5RFT8;E5RK86;H0YC42;U3KQQ8	Q9Y2Q9;H0YAT2;H7C5V3;E5RGC7	28S ribosomal protein S28, mitochondrial	MRPS28
NaN	NaN	0.460481	NaN	NaN	NaN			2	2	2	17.8	17.8	17.8	15.524	4.5368	47720000	25283000	22437000	0	0.460481	0	NaN	Q8N5N7-2;Q8N5N7	Q8N5N7-2;Q8N5N7	39S ribosomal protein L50, mitochondrial	MRPL50
0.978928	0.265557	0.129613	NaN	NaN	NaN			6	6	6	3.3	3.3	3.3	236.28	15.818	141830000	63293000	78541000	0.649435	0.458032	0	NaN	Q12789-3;Q12789;H3BU55;H3BU37	Q12789-3;Q12789	General transcription factor 3C polypeptide 1	GTF3C1
0.619929	0.184217	0.559541	NaN	NaN	NaN			6	6	6	25.4	25.4	25.4	29.321	9.7566	196200000	112700000	83499000	1.10047	0.454562	0	NaN	P78346;P78346-2;Q5VU10;Q5VU11	P78346;P78346-2;Q5VU10;Q5VU11	Ribonuclease P protein subunit p30	RPP30
0.558659	0.568421	0.233275	NaN	NaN	NaN			8	7	7	21.1	18.2	18.2	44.179	19.203	2109900000	538010000	1571900000	1.26578	0.453452	0	NaN	P63092-3;P63092-2;P63092;P63092-4;Q5JWF2-2;Q5JWF2;A0A0A0MR13;S4R3E3;Q5JWE9;H0Y7F4;S4R3V9	P63092-3;P63092-2;P63092;P63092-4;Q5JWF2-2;Q5JWF2	Guanine nucleotide-binding protein G(s) subunit alpha isoforms short;Guanine nucleotide-binding protein G(s) subunit alpha isoforms XLas	GNAS
NaN	NaN	0.453122	NaN	NaN	NaN			3	3	3	14.2	14.2	14.2	34.767	8.6773	43361000	24987000	18374000	0	0.453122	0	NaN	A0A087WVI1;Q96JY6;Q96JY6-3;C9J760;C9J0X3;C9K0F0;C9JSR2;C9JS55;Q96JY6-2;Q96JY6-4;Q96JY6-5;A0A087WU48;F8WFB8;E5RGS7;A0A087WXJ0;H0YBP7;B3KPU0	A0A087WVI1;Q96JY6;Q96JY6-3;C9J760;C9J0X3;C9K0F0;C9JSR2;C9JS55;Q96JY6-2;Q96JY6-4;Q96JY6-5	PDZ and LIM domain protein 2	PDLIM2
0.53067	0.459641	0.354678	NaN	NaN	NaN			8	8	8	48.1	48.1	48.1	20.762	141.31	3031800000	1726400000	1305300000	1.89441	0.44833	0	NaN	H0Y7A7;P62158;E7ETZ0;E7EMB3;Q96HY3;M0QZ52;G3V361;F8WBR5;G3V226;G3V479;C9J7T9;P27482;P02585	H0Y7A7;P62158;E7ETZ0;E7EMB3;Q96HY3;M0QZ52;G3V361	Calmodulin	CALM2;CALM1;CALM3
1.03886	0.260748	0.0448837	NaN	NaN	NaN			3	3	3	5.5	5.5	5.5	103.83	31.427	534530000	114860000	419660000	0.559235	0.448163	0	NaN	Q14596-2;Q14596;B7Z5R6	Q14596-2;Q14596;B7Z5R6	Next to BRCA1 gene 1 protein	NBR1
0.276437	0.469678	0.570171	NaN	NaN	NaN			4	4	4	12	12	12	36.908	7.6182	336840000	182180000	154660000	1.43782	0.438762	0	NaN	Q9BYD6;H0Y8N7	Q9BYD6;H0Y8N7	39S ribosomal protein L1, mitochondrial	MRPL1
0.320542	0.442758	0.547746	NaN	NaN	NaN			7	7	7	14.9	14.9	14.9	75.555	54.875	940920000	495600000	445330000	1.66092	0.437015	0	NaN	Q4KMQ1;H3BLU1;Q4KMQ1-2;Q4KMQ1-4;Q4KMQ1-3	Q4KMQ1	Taperin	TPRN
0.530171	0.425352	0.340277	NaN	NaN	NaN			6	6	6	32.6	32.6	32.6	31.705	24.805	329880000	190930000	138950000	1.80181	0.431933	0	NaN	Q9H2W6;A0A087WT90;A0A087WT51	Q9H2W6	39S ribosomal protein L46, mitochondrial	MRPL46
0.689389	0.125916	0.480369	NaN	NaN	NaN			7	7	7	42.1	42.1	42.1	17.853	18.182	187000000	97252000	89744000	0.922464	0.431891	0	NaN	Q8N983-4;H0Y6Y8;B1AL05;Q8N983-3;Q8N983-2;Q8N983;Q8N983-6;Q8N983-7;H0YBU8;M0R051	Q8N983-4;H0Y6Y8;B1AL05;Q8N983-3;Q8N983-2;Q8N983;Q8N983-6;Q8N983-7;H0YBU8	39S ribosomal protein L43, mitochondrial	MRPL43
NaN	0.301002	0.545771	NaN	NaN	NaN			3	3	3	28.8	28.8	28.8	11.999	18.901	49212000	27902000	21310000	0.746811	0.423386	0	NaN	P61457;H0YA52;Q9H0N5	P61457	Pterin-4-alpha-carbinolamine dehydratase	PCBD1
NaN	NaN	0.417704	NaN	NaN	NaN			2	2	2	20.4	20.4	20.4	15.875	7.9462	83364000	46273000	37091000	0	0.417704	0	NaN	K7ES31;K7ERF1;Q9UBQ5-2;Q9UBQ5;K7EQM4;A0A087WVB9	K7ES31;K7ERF1;Q9UBQ5-2;Q9UBQ5;K7EQM4;A0A087WVB9	Eukaryotic translation initiation factor 3 subunit K	EIF3K
0.562084	0.362217	0.321928	NaN	NaN	NaN			3	3	3	11.7	11.7	11.7	27.085	5.5596	415300000	244190000	171110000	1.51575	0.41541	0	NaN	Q9HD33-2;Q9HD33;Q9HD33-3	Q9HD33-2;Q9HD33;Q9HD33-3	39S ribosomal protein L47, mitochondrial	MRPL47
NaN	0.510962	0.319502	NaN	NaN	NaN			3	3	3	26.3	26.3	26.3	15.383	7.5637	110450000	64299000	46152000	0.840887	0.415232	0	NaN	Q8IXM3	Q8IXM3	39S ribosomal protein L41, mitochondrial	MRPL41
NaN	NaN	0.412402	NaN	NaN	NaN			2	2	2	7.9	7.9	7.9	30.243	4.4301	130150000	65510000	64643000	0	0.412402	0	NaN	Q9BYD2;Q5SZR1	Q9BYD2;Q5SZR1	39S ribosomal protein L9, mitochondrial	MRPL9
NaN	0.410884	NaN	NaN	NaN	NaN			1	1	1	16.2	16.2	16.2	7.2053	2.1142	16162000	8417500	7744900	0	0.410884	0	NaN	P50151	P50151	Guanine nucleotide-binding protein G(I)/G(S)/G(O) subunit gamma-10	GNG10
NaN	0.410124	NaN	NaN	NaN	NaN			2	2	2	4.4	4.4	4.4	48.07	3.4734	142110000	78663000	63449000	0	0.410124	0	NaN	I3L4J1;Q9UN37;O75351;Q6PIW4-2;Q6PIW4	I3L4J1;Q9UN37;O75351;Q6PIW4-2;Q6PIW4	Vacuolar protein sorting-associated protein 4A;Vacuolar protein sorting-associated protein 4B;Fidgetin-like protein 1	VPS4A;VPS4B;FIGNL1
0.0480967	0.50019	0.635708	NaN	NaN	NaN			3	3	3	5.9	5.9	5.9	59.095	4.1236	73451000	38360000	35091000	0.805725	0.394665	0	NaN	P35240-4;P35240-6;P35240-5;P35240-8;P35240-3;P35240;P35240-2;P35240-10	P35240-4;P35240-6;P35240-5;P35240-8;P35240-3;P35240;P35240-2	Merlin	NF2
0.667847	NaN	0.113834	NaN	NaN	NaN			3	3	3	28.3	28.3	28.3	12.629	4.5655	49114000	28246000	20868000	0.406136	0.39084	0	NaN	Q9Y291;C9JBY7	Q9Y291;C9JBY7	28S ribosomal protein S33, mitochondrial	MRPS33
NaN	NaN	0.387804	NaN	NaN	NaN			1	1	1	5.2	5.2	5.2	27.938	2.8809	36511000	20407000	16105000	0	0.387804	0	NaN	F5H625;Q8IX18-4;Q8IX18-3;Q8IX18-2;Q8IX18	F5H625;Q8IX18-4;Q8IX18-3;Q8IX18-2;Q8IX18	Probable ATP-dependent RNA helicase DHX40	DHX40
0.229219	0.501821	0.426426	NaN	NaN	NaN			6	6	6	33.5	33.5	33.5	21.834	10.917	968020000	521380000	446640000	1.3807	0.385822	0	NaN	Q9NUP9;G3V1D4;H0YIA8;O14910;H0YI92;J3KN23;Q9HAP6	Q9NUP9;G3V1D4;H0YIA8;O14910	Protein lin-7 homolog C;Protein lin-7 homolog A	LIN7C;LIN7A
NaN	NaN	0.382944	NaN	NaN	NaN			2	2	2	6.3	6.3	6.3	32.389	3.6579	156490000	91496000	64997000	0	0.382944	0	NaN	F5GWA4;Q9H3F6-2;Q9H3F6;F5GY15;F5GWK6;F5H268;B3KVY5;F5H497;Q9H3F6-3;Q13829-2;Q13829;Q8WZ19	F5GWA4;Q9H3F6-2;Q9H3F6;F5GY15;F5GWK6;F5H268;B3KVY5;F5H497;Q9H3F6-3;Q13829-2;Q13829;Q8WZ19	BTB/POZ domain-containing adapter for CUL3-mediated RhoA degradation protein 3;BTB/POZ domain-containing adapter for CUL3-mediated RhoA degradation protein 2;BTB/POZ domain-containing adapter for CUL3-mediated RhoA degradation protein 1	KCTD10;TNFAIP1;KCTD13
0.227125	0.322505	0.597412	NaN	NaN	NaN			7	7	7	35.1	35.1	35.1	24.211	15.691	1991500000	1127600000	863860000	1.12533	0.382347	0	NaN	Q9BYN8	Q9BYN8	28S ribosomal protein S26, mitochondrial	MRPS26
0.352307	0.405448	NaN	NaN	NaN	NaN			3	3	3	13.4	13.4	13.4	35.079	22.874	136190000	71316000	64872000	1.35093	0.378877	0	NaN	Q6UXN9	Q6UXN9	WD repeat-containing protein 82	WDR82
0.369048	0.423202	0.332164	NaN	NaN	NaN	+		19	19	19	14.3	14.3	14.3	196.71	95.007	1562700000	926620000	636060000	2.30639	0.374804	0	NaN	Q9BY89;Q9BY89-2	Q9BY89	Uncharacterized protein KIAA1671	KIAA1671
0.346078	0.354678	0.422664	NaN	NaN	NaN	+		6	6	6	39.9	39.9	39.9	29.395	52.525	1024700000	573110000	451620000	2.38111	0.374473	0	NaN	Q9Y676;A0A0G2JIC6	Q9Y676;A0A0G2JIC6	28S ribosomal protein S18b, mitochondrial	MRPS18B
0.365804	NaN	NaN	NaN	NaN	NaN			2	2	2	10.2	10.2	10.2	19.015	2.1959	24048000	13909000	10139000	0	0.365804	0	NaN	Q96EL2;F8VYR5	Q96EL2;F8VYR5	28S ribosomal protein S24, mitochondrial	MRPS24
NaN	NaN	0.361768	NaN	NaN	NaN			2	2	2	9.2	9.2	9.2	36.944	6.1546	47646000	25178000	22468000	0	0.361768	0	NaN	Q6P087-2;Q6P087;H7C0K7;C9JM75;H7C454;H7C1H7;Q6P087-3	Q6P087-2;Q6P087;H7C0K7;C9JM75;H7C454;H7C1H7;Q6P087-3	RNA pseudouridylate synthase domain-containing protein 3	RPUSD3
0.246469	0.337768	0.5007	NaN	NaN	NaN			7	7	7	40	40	40	26.332	32.01	2271700000	1304500000	967280000	1.40047	0.361646	0	NaN	C9JJ19;P82930;A0A087WUZ8	C9JJ19;P82930;A0A087WUZ8	28S ribosomal protein S34, mitochondrial	MRPS34
0.360308	NaN	NaN	NaN	NaN	NaN			5	5	5	14.4	14.4	14.4	61.257	31.383	418880000	307940000	110950000	0	0.360308	0	NaN	A6PW57;Q99755-2;Q99755-4;Q99755-3;Q99755;A2A3N6;A6PW58;A2A5X0;O14986-3;O14986;O14986-2;O60331-4;O60331;O60331-2;O60331-3	A6PW57;Q99755-2;Q99755-4;Q99755-3;Q99755	Phosphatidylinositol 4-phosphate 5-kinase type-1 alpha	PIP5K1A
0.537843	0.174279	0.348799	NaN	NaN	NaN			7	7	7	5	5	5	155.98	13.591	180050000	99285000	80769000	1.10814	0.35364	0	NaN	A0A087WW76;Q5T5U3;Q5JSD8;E7ESW5;F8W9U9;Q5T5U3-3;H0Y468	A0A087WW76;Q5T5U3	Rho GTPase-activating protein 21	ARHGAP21
0.401303	0.435309	0.221073	NaN	NaN	NaN			9	9	9	9.8	9.8	9.8	133.97	46.927	556000000	344310000	211690000	1.47161	0.352561	0	NaN	A0A0D9SF60;Q99569-2;Q99569;H0YFB1;E7EST6;B4DRK2;E9PHB5;E7EPC8;Q9UQB3-2;Q9UQB3	A0A0D9SF60;Q99569-2;Q99569	Plakophilin-4	PKP4
NaN	NaN	0.333767	NaN	NaN	NaN			1	1	1	3.7	3.7	3.7	48.006	9.0755	81952000	49023000	32928000	0	0.333767	0	NaN	P82675	P82675	28S ribosomal protein S5, mitochondrial	MRPS5
0.487795	0.22885	0.278104	NaN	NaN	NaN			5	5	5	26.4	26.4	26.4	24.325	13.47	174510000	101730000	72777000	1.27717	0.331583	0	NaN	E7ESL0;A0A0C4DGX2;J3KQY1;Q9NWU5;Q9NWU5-2;Q9NWU5-3	E7ESL0;A0A0C4DGX2;J3KQY1;Q9NWU5;Q9NWU5-2;Q9NWU5-3	39S ribosomal protein L22, mitochondrial	MRPL22
0.188274	0.40021	0.399116	NaN	NaN	NaN			6	6	6	48	48	48	20.116	21.62	365410000	191520000	173890000	1.36765	0.3292	0	NaN	P82663;E7EPW2;P82663-3;P82663-2	P82663;E7EPW2;P82663-3;P82663-2	28S ribosomal protein S25, mitochondrial	MRPS25
NaN	0.326652	0.320542	NaN	NaN	NaN	+		5	5	4	14.2	14.2	11.2	45.413	11.259	269230000	152350000	116880000	2.22114	0.323597	0	NaN	Q9Y608-2;Q9Y608-4;Q9Y608-5;Q9Y608;Q9Y608-3;H7C3N9;C9JSU1;Q32MZ4-4	Q9Y608-2;Q9Y608-4;Q9Y608-5;Q9Y608;Q9Y608-3	Leucine-rich repeat flightless-interacting protein 2	LRRFIP2
0.606348	0.0993626	0.263635	NaN	NaN	NaN			5	5	5	27.3	27.3	27.3	24.915	13.796	317110000	182510000	134600000	0.787927	0.323115	0	NaN	Q96A35;X6RJ73	Q96A35	39S ribosomal protein L24, mitochondrial	MRPL24
0.0721745	0.361544	0.516419	NaN	NaN	NaN			2	2	2	7.9	7.9	7.9	28.506	4.7788	247750000	136920000	110830000	0.868173	0.316712	0	NaN	A2IDC6;Q13084;A2IDC7;Q4TT37	A2IDC6;Q13084;A2IDC7;Q4TT37	39S ribosomal protein L28, mitochondrial	MRPL28
0.191057	0.469678	0.288181	NaN	NaN	NaN			4	4	4	7.5	7.5	7.5	72.759	12.028	227770000	116530000	111240000	1.21726	0.316305	0	NaN	Q9BRK4;Q9Y250-5;Q9Y250-4;Q9Y250-3;Q9Y250-2;Q9Y250	Q9BRK4	Leucine zipper putative tumor suppressor 2	LZTS2
0.253384	0.460061	0.23352	NaN	NaN	NaN			455	2	2	78.7	0.4	0.4	514.77	41.763	507820000	299140000	208690000	1.31133	0.315655	0	NaN	Q15149-9	Q15149-9	Plectin	PLEC
0.476433	0.273814	0.195726	NaN	NaN	NaN			11	11	11	5.8	5.8	5.8	210.58	21.611	832600000	455570000	377040000	1.19572	0.315324	0	NaN	Q15746-6;Q15746;Q15746-5;Q15746-2;Q15746-3;Q15746-11;Q15746-7;Q15746-4;Q15746-9;D6R9C2;Q15746-10;Q15746-8	Q15746-6;Q15746;Q15746-5;Q15746-2;Q15746-3;Q15746-11;Q15746-7;Q15746-4;Q15746-9	Myosin light chain kinase, smooth muscle;Myosin light chain kinase, smooth muscle, deglutamylated form	MYLK
0.404903	0.265557	0.274172	NaN	NaN	NaN			13	13	13	22.2	22.2	22.2	75.475	58.791	1713500000	932760000	780770000	1.7014	0.314877	0	NaN	P28288;P28288-2;P28288-3	P28288;P28288-2	ATP-binding cassette sub-family D member 3	ABCD3
0.318924	0.282973	0.334339	NaN	NaN	NaN	+		12	12	12	46.1	46.1	46.1	31.704	58.02	2269700000	1289700000	979990000	2.62536	0.312079	0	NaN	J3QLS3;Q9Y2R9;J3QQS1;J3KSI8;J3QKW2	J3QLS3;Q9Y2R9;J3QQS1;J3KSI8;J3QKW2	28S ribosomal protein S7, mitochondrial	MRPS7
0.466653	0.20364	0.259062	NaN	NaN	NaN			6	6	6	17.4	17.4	17.4	44.596	15.688	417870000	215940000	201930000	1.21645	0.309785	0	NaN	Q96DV4;Q96DV4-2	Q96DV4	39S ribosomal protein L38, mitochondrial	MRPL38
NaN	NaN	0.2929	NaN	NaN	NaN			3	3	3	14.6	14.6	14.6	18.929	3.7846	334390000	319140000	15251000	0	0.2929	0	NaN	M0QYZ2;M0R0N4;X6R390;P53680-2;P53680;M0R1S0;M0QZ21	M0QYZ2;M0R0N4;X6R390;P53680-2;P53680	AP-2 complex subunit sigma	AP2S1
0.361881	0.129613	0.379288	NaN	NaN	NaN			6	6	6	16.7	16.7	16.7	29.842	7.6199	668350000	383020000	285320000	1.16105	0.290261	0	NaN	P82914	P82914	28S ribosomal protein S15, mitochondrial	MRPS15
0.287472	NaN	NaN	NaN	NaN	NaN			3	3	3	18.3	18.3	18.3	24.95	19.901	290620000	161360000	129260000	0	0.287472	0	NaN	Q9H444	Q9H444	Charged multivesicular body protein 4b	CHMP4B
0.280719	0.331591	0.23131	NaN	NaN	NaN			13	13	13	44.5	44.5	44.5	41.044	84.32	2513500000	1472800000	1040700000	1.9816	0.281206	0	NaN	P51398-2;P51398-3;P51398;V9GZ03;V9GYL9;V9GYA7;V9GZ61;V9GYJ9;V9GYC9;V9GYW1;V9GY11;V9GYF7;V9GYJ3	P51398-2;P51398-3;P51398;V9GZ03;V9GYL9;V9GYA7	28S ribosomal protein S29, mitochondrial	DAP3
NaN	NaN	0.278104	NaN	NaN	NaN			11	4	4	48.8	22.6	22.6	37.567	25.393	397170000	209830000	187340000	0	0.278104	0	NaN	Q9HAV0;H7C5J5	Q9HAV0	Guanine nucleotide-binding protein subunit beta-4	GNB4
0.883777	0.0057592	-0.0587133	NaN	NaN	NaN			4	4	4	6.4	6.4	6.4	92.239	14.285	207140000	127440000	79702000	0.338709	0.276941	0	NaN	Q9UHI6;E9PJ60	Q9UHI6;E9PJ60	Probable ATP-dependent RNA helicase DDX20	DDX20
0.345056	NaN	0.201258	NaN	NaN	NaN			4	4	4	13.7	13.7	13.7	33.631	7.1829	175240000	96833000	78405000	0.785549	0.273157	0	NaN	Q92600;Q92600-3;Q92600-2;F8WBZ6	Q92600;Q92600-3;Q92600-2	Cell differentiation protein RCD1 homolog	RQCD1
0.183836	0.200002	0.420617	NaN	NaN	NaN			5	5	5	27.3	27.3	27.3	33.792	37.59	432550000	230730000	201820000	1.14013	0.268152	0	NaN	K7ES61;Q9BYD3;X6RAY8;Q9BYD3-2;K7ELQ0;K7EKI4;K7ELF1;K7EJ73	K7ES61;Q9BYD3;X6RAY8;Q9BYD3-2;K7ELQ0	39S ribosomal protein L4, mitochondrial	MRPL4
0.310922	0.254231	0.238542	NaN	NaN	NaN	+		4	4	4	5.2	5.2	5.2	75.225	6.1208	182840000	101660000	81183000	2.17612	0.267898	0	NaN	Q9H089;F8WFC6;H7C2X7	Q9H089;F8WFC6	Large subunit GTPase 1 homolog	LSG1
NaN	0.461005	0.0652966	NaN	NaN	NaN			4	4	4	15.9	15.9	15.9	45.318	26.689	63556000	35071000	28485000	0.386766	0.263151	0	NaN	Q92665	Q92665	28S ribosomal protein S31, mitochondrial	MRPS31
0.526069	0.590913	-0.336756	NaN	NaN	NaN			4	4	4	13.2	13.2	13.2	35.808	7.0078	235780000	144080000	91694000	0.322293	0.260076	0	NaN	O00214;O00214-2;E9PN19;F6V2D4;B1ANM0;H7BXD8;Q5T3P9;E9PJ77;E9PRN3	O00214;O00214-2;E9PN19;F6V2D4;B1ANM0;H7BXD8;Q5T3P9	Galectin-8;Galectin	LGALS8
0.254352	0.0515809	0.464877	NaN	NaN	NaN			7	4	4	26.4	20.3	20.3	39.548	60.106	312240000	185050000	127190000	0.784798	0.256937	0	NaN	Q6IBS0;D6RG15;H0Y858	Q6IBS0;D6RG15;H0Y858	Twinfilin-2	TWF2
0.213503	0.365916	0.178874	NaN	NaN	NaN			18	18	18	28.7	28.7	28.7	93.609	175.84	3992600000	2287200000	1705400000	1.31898	0.252764	0	NaN	B8ZZD4;Q86VP1-2;Q86VP1;Q86VP1-4;Q86VP1-3;H7C3L5;C9J7J4;F8WBU9;C9JBZ7	B8ZZD4;Q86VP1-2;Q86VP1;Q86VP1-4;Q86VP1-3	Tax1-binding protein 1	TAX1BP1
0.0558898	0.58246	0.118094	NaN	NaN	NaN			4	4	4	4.6	4.6	4.6	130.08	4.4997	4689400000	2848600000	1840800000	0.571262	0.252148	0	NaN	A0A087WUZ6;Q8NI35-4;Q8NI35-3;Q8NI35-2;Q8NI35;Q8NI35-5;A0A0U1RR46	A0A087WUZ6;Q8NI35-4;Q8NI35-3;Q8NI35-2;Q8NI35;Q8NI35-5	InaD-like protein	INADL
0.661658	0.224905	-0.133321	NaN	NaN	NaN			1	1	1	6.4	6.4	6.4	16.131	2.5853	93924000	25839000	68085000	0.410354	0.251081	0	NaN	Q5EBL8;Q5EBL8-2	Q5EBL8;Q5EBL8-2	PDZ domain-containing protein 11	PDZD11
0.0200577	0.0764222	0.651499	NaN	NaN	NaN			5	5	3	3.8	3.8	2.2	189.15	8.5314	520640000	250840000	269800000	0.46601	0.249326	0	NaN	Q5TIG5;A8MQ02;J3KN01;P55196-2;P55196-6;P55196-3;P55196-1;P55196;P55196-5;H0Y9I0;H0Y8L4	Q5TIG5;A8MQ02;J3KN01;P55196-2;P55196-6;P55196-3;P55196-1;P55196;P55196-5	Afadin	MLLT4
NaN	0.494569	-0.0215407	NaN	NaN	NaN			5	5	5	44.7	44.7	44.7	25.249	50.331	205820000	123700000	82121000	0.277605	0.236514	0	NaN	Q9NQT4;M0R050;M0R102;M0R289	Q9NQT4;M0R050	Exosome complex component RRP46	EXOSC5
0.0842003	0.0766959	0.529971	NaN	NaN	NaN			8	8	8	4.5	4.5	4.5	231.43	28.765	382680000	234190000	148490000	0.578117	0.230289	0	NaN	O14578;O14578-4;H7BYJ3;O14578-3;F5H4K4;O14578-2	O14578;O14578-4;H7BYJ3;O14578-3	Citron Rho-interacting kinase	CIT
0.10286	NaN	0.353436	NaN	NaN	NaN			1	1	1	6.8	6.8	6.8	15.935	3.0998	170740000	98544000	72197000	0.495249	0.228148	0	NaN	C9JJV6;C9JZL8;C9J5M0;C9JC07;Q96S97	C9JJV6;C9JZL8;C9J5M0;C9JC07;Q96S97	Myeloid-associated differentiation marker	MYADM
0.200253	0.257614	0.212756	NaN	NaN	NaN	+		11	11	11	43.3	43.3	43.3	38.638	59.92	1900300000	1059300000	840990000	2.22082	0.223541	0	NaN	Q6IN84;A0A087WZC1;Q6IN84-2	Q6IN84	rRNA methyltransferase 1, mitochondrial	MRM1
NaN	0.351855	0.0897694	NaN	NaN	NaN			27	1	1	38.2	2.7	2.7	79.361	15.508	334370000	190600000	143770000	0.467283	0.220812	0	NaN	Q0ZGT2-2;H7BXY5;E7EUA0;E7ETM8	Q0ZGT2-2;H7BXY5;E7EUA0;E7ETM8	Nexilin	NEXN
0.407842	0.0321009	NaN	NaN	NaN	NaN			60	1	0	50.4	1.2	0	153.67	8.7787	314490000	184250000	130240000	0.346792	0.219972	0	NaN	Q8WWI1-3;J3KP06;Q8WWI1;E9PMS6;Q8WWI1-4;Q8WWI1-2;E9PMT2;A0A0A0MTE2;Q8WWI1-5;H0Y424;E9PK58;H0YE95;E9PJ10;E9PLU6;E9PRE3;E9PRJ0	Q8WWI1-3;J3KP06;Q8WWI1;E9PMS6;Q8WWI1-4;Q8WWI1-2;E9PMT2;A0A0A0MTE2;Q8WWI1-5;H0Y424	LIM domain only protein 7	LMO7
0.101919	0.25544	0.29901	NaN	NaN	NaN			5	5	5	9	9	9	78.549	16.368	332960000	194520000	138450000	1.17262	0.21879	0	NaN	Q96EY7;B8ZZQ4;F8WE76;Q96EY7-2	Q96EY7	Pentatricopeptide repeat domain-containing protein 3, mitochondrial	PTCD3
0.0635029	0.107286	0.482952	NaN	NaN	NaN			6	6	6	12.8	12.8	12.8	78.457	20.905	424800000	270350000	154450000	0.613886	0.217914	0	NaN	Q8NC60	Q8NC60	Nitric oxide-associated protein 1	NOA1
0.157949	0.316609	0.174918	NaN	NaN	NaN			7	7	7	37.1	37.1	37.1	31.821	31.925	327520000	187430000	140090000	1.30132	0.216492	0	NaN	Q15024	Q15024	Exosome complex component RRP42	EXOSC7
0.583326	0.193583	-0.136093	NaN	NaN	NaN			4	4	4	27.1	27.1	27.1	18.237	14.969	177800000	110660000	67133000	0.384821	0.213605	0	NaN	Q9Y3C6	Q9Y3C6	Peptidyl-prolyl cis-trans isomerase-like 1	PPIL1
NaN	NaN	0.212258	NaN	NaN	NaN			3	3	3	8.9	8.9	8.9	41.676	4.7913	34871000	21360000	13512000	0	0.212258	0	NaN	Q96QE5;J3KTG7	Q96QE5	Transcription elongation factor, mitochondrial	TEFM
0.383829	NaN	-0.0117771	NaN	NaN	NaN			10	4	4	36	13.3	13.3	46.306	21.438	313760000	179160000	134600000	0.284392	0.186026	0	NaN	G5E972;P42167;P42167-2;H0YJH7	G5E972;P42167;P42167-2;H0YJH7	Lamina-associated polypeptide 2, isoforms beta/gamma;Thymopoietin;Thymopentin	TMPO
NaN	0.183836	NaN	NaN	NaN	NaN			2	2	2	4.6	4.6	4.6	125	13.483	53538000	29669000	23868000	0	0.183836	0	NaN	A0A087X295;Q9NNW5;E5RFX3;F8WE36;C9K020;E9PBK6;E9PDU5	A0A087X295;Q9NNW5;E5RFX3;F8WE36;C9K020;E9PBK6;E9PDU5	WD repeat-containing protein 6	WDR6
0.149259	0.231678	0.169284	NaN	NaN	NaN			30	4	0	77.4	14.1	0	28.747	30.877	5427000000	3252100000	2174900000	1.74903	0.183407	0	NaN	H7BYY1;F5H7S3;B7Z596;P09493-2;P09493-5;H0YN06	H7BYY1;F5H7S3;B7Z596;P09493-2;P09493-5	Tropomyosin alpha-1 chain	TPM1
NaN	NaN	0.183328	NaN	NaN	NaN			2	2	2	9.9	9.9	9.9	19.531	3.3331	106060000	55947000	50115000	0	0.183328	0	NaN	F8VUA2;F8VVT7;Q9HD42;F5H875	F8VUA2;F8VVT7;Q9HD42;F5H875	Charged multivesicular body protein 1a	CHMP1A
NaN	0.292664	0.073546	NaN	NaN	NaN			2	2	2	14.4	14.4	14.4	14.381	4.6444	119710000	63186000	56523000	0.464372	0.183105	0	NaN	Q9BTL3	Q9BTL3	RNMT-activating mini protein	FAM103A1
0.443819	0.145873	-0.0719974	NaN	NaN	NaN			5	5	5	7.7	7.7	7.7	78.832	18.35	391730000	232100000	159620000	0.434526	0.172565	0	NaN	Q9NVV4-2;Q9NVV4;Q5T851;Q5T852;A0A087WYC0;A0A0C4DGS5;Q08379-2;Q08379	Q9NVV4-2;Q9NVV4	Poly(A) RNA polymerase, mitochondrial	MTPAP
0.0200577	0.120485	0.375846	NaN	NaN	NaN			3	3	3	8.8	8.8	8.8	60.54	32.341	118310000	69074000	49236000	0.60978	0.172129	0	NaN	Q9BVP2-2;Q9BVP2	Q9BVP2-2;Q9BVP2	Guanine nucleotide-binding protein-like 3	GNL3
-0.0135381	0.322044	0.183455	NaN	NaN	NaN			14	6	0	59.3	31.3	0	37.034	98.706	696630000	418830000	277800000	0.630486	0.163987	0	NaN	Q96PK6-5	Q96PK6-5	RNA-binding protein 14	RBM14
NaN	0.8614	-0.543152	NaN	NaN	NaN			2	2	2	10.9	10.9	10.9	20.772	5.2557	153530000	92165000	61362000	0.0664379	0.159124	0	NaN	C9J0A7;Q9UQN3-2;Q9UQN3;A0A087WW88	C9J0A7;Q9UQN3-2;Q9UQN3;A0A087WW88	Charged multivesicular body protein 2b	CHMP2B
NaN	0.0508847	0.258338	NaN	NaN	NaN			5	5	5	12.3	12.3	12.3	72.757	23.332	138470000	74355000	64112000	0.424593	0.154611	0	NaN	O95905;O95905-3;C9J316;O95905-2;F2Z2R1;C9JGV1	O95905;O95905-3;C9J316;O95905-2;F2Z2R1;C9JGV1	Protein SGT1	ECD
0.289008	0.0127833	0.126576	NaN	NaN	NaN			32	3	2	72.9	9.9	6.7	32.814	41.237	1240100000	743010000	497080000	0.663986	0.142789	0	NaN	Q5TCU3;Q5TCU8;P07951;U3KQK2	Q5TCU3;Q5TCU8;P07951	Tropomyosin beta chain	TPM2
0.00432164	0.0859685	0.312317	NaN	NaN	NaN			4	4	4	25.8	25.8	25.8	25.72	29.382	293440000	165200000	128240000	0.548995	0.134202	0	NaN	I3L0E3;Q9Y2R5;E9PE17	I3L0E3;Q9Y2R5;E9PE17	28S ribosomal protein S17, mitochondrial	hCG_1984214;MRPS17
NaN	NaN	0.132774	NaN	NaN	NaN			2	2	2	11.2	11.2	11.2	25.62	7.3284	24814000	14249000	10564000	0	0.132774	0	NaN	A0A075B797;M0R3B2;A0A075B6F9;Q9Y314;M0QX85;M0R1K2	A0A075B797;M0R3B2;A0A075B6F9;Q9Y314;M0QX85;M0R1K2	Nitric oxide synthase-interacting protein	NOSIP
-1.47939	1.05255	0.819178	NaN	NaN	NaN			3	3	3	17.1	17.1	17.1	28.147	10.578	235240000	172400000	62840000	0.0524299	0.13078	0	NaN	G3V5Z7;P60900-2;P60900;G3V3U4;G3V3I1;G3V295;H0YJC4;P60900-3	G3V5Z7;P60900-2;P60900;G3V3U4;G3V3I1;G3V295	Proteasome subunit alpha type;Proteasome subunit alpha type-6	PSMA6
-0.102434	0.273934	0.197236	NaN	NaN	NaN			3	3	3	28.8	28.8	28.8	29.701	61.038	621560000	356820000	264740000	0.401767	0.122912	0	NaN	Q5H9P2;P36383;K7ERH3	Q5H9P2;P36383	Gap junction gamma-1 protein	DKFZp686P0738;GJC1
0.122739	0.0448837	0.184725	NaN	NaN	NaN			9	9	9	8.9	8.9	8.9	142.16	33.326	1334100000	777580000	556500000	0.99572	0.117449	0	NaN	Q86SQ0;Q86SQ0-2;Q86SQ0-3;E9PFQ4;E9PGF6;G5E9V3;E9PDY7	Q86SQ0;Q86SQ0-2;Q86SQ0-3;E9PFQ4;E9PGF6	Pleckstrin homology-like domain family B member 2	PHLDB2
0.187388	0.0203421	0.140909	NaN	NaN	NaN			4	4	4	22.5	22.5	22.5	22.487	11.075	1469400000	907740000	561670000	0.839575	0.116213	0	NaN	Q92522	Q92522	Histone H1x	H1FX
0.0899048	0.248656	0.00791302	NaN	NaN	NaN			4	4	4	40	40	40	12.405	8.6761	173890000	97137000	76753000	0.612968	0.115491	0	NaN	Q7RTV0	Q7RTV0	PHD finger-like domain-containing protein 5A	PHF5A
NaN	NaN	0.1133	NaN	NaN	NaN			2	2	2	8	8	8	27.278	12.244	118180000	78715000	39469000	0	0.1133	0	NaN	A2A2V1;P04156-2;P04156	A2A2V1;P04156-2;P04156	Major prion protein	PRNP
0.0939657	-0.163898	0.379399	NaN	NaN	NaN			1	1	1	0.4	0.4	0.4	253.92	1.9666	3525000000	2142400000	1382600000	0.23774	0.103156	0	NaN	Q07283	Q07283	Trichohyalin	TCHH
0.0980152	NaN	NaN	NaN	NaN	NaN			1	1	1	8.8	8.8	8.8	15.451	3.7031	15464000	9039800	6424100	0	0.0980152	0	NaN	A0A087WTU4;Q9P227-2;Q9P227	A0A087WTU4;Q9P227-2;Q9P227	Rho GTPase-activating protein 23	ARHGAP23
NaN	0.0977456	NaN	NaN	NaN	NaN			1	1	1	3.3	3.3	3.3	33.868	2.0514	96967000	56629000	40339000	0	0.0977456	0	NaN	Q9UBR2	Q9UBR2	Cathepsin Z	CTSZ
0.00187425	0.18954	0.0698396	NaN	NaN	NaN			11	11	11	26.6	26.6	26.6	63.523	49.024	1295600000	759250000	536350000	0.596339	0.0870846	0	NaN	O95470;H0Y3V8;H7BXL7	O95470	Sphingosine-1-phosphate lyase 1	SGPL1
NaN	-0.0958049	0.265437	NaN	NaN	NaN			3	3	3	12.4	12.4	12.4	30.454	4.8169	83211000	46350000	36861000	0.142358	0.084816	0	NaN	O95900-2;O95900	O95900-2;O95900	Probable tRNA pseudouridine synthase 2	TRUB2
0.0836559	NaN	NaN	NaN	NaN	NaN			2	2	2	9.2	9.2	9.2	21.604	2.4755	104550000	45805000	58747000	0	0.0836559	0	NaN	Q9UJY1	Q9UJY1	Heat shock protein beta-8	HSPB8
0.00690831	0.0734089	0.161823	NaN	NaN	NaN			9	9	9	30	30	30	35.236	31.051	959270000	592220000	367060000	0.669881	0.0807135	0	NaN	Q9UNQ2;A0A0C4DGB1;D6RCL3	Q9UNQ2;A0A0C4DGB1	Probable dimethyladenosine transferase	DIMT1
NaN	0.0855606	0.0709388	NaN	NaN	NaN			3	3	3	7.5	7.5	7.5	81.727	13.952	61380000	37345000	24035000	1.22689	0.0782497	0	NaN	Q9HCM4-3;Q9HCM4;Q9HCM4-2;Q9HCM4-4;Q9H329-2;Q9H329	Q9HCM4-3;Q9HCM4;Q9HCM4-2;Q9HCM4-4	Band 4.1-like protein 5	EPB41L5
0.159242	0.271426	-0.203402	NaN	NaN	NaN			8	1	1	10.5	2	2	100.45	16.156	303510000	184490000	119030000	0.187204	0.0757551	0	NaN	P26232-2;P26232-5;P26232;P26232-3;C9J144;C9IZ88	P26232-2;P26232-5;P26232;P26232-3	Catenin alpha-2	CTNNA2
0.087327	0.130404	0.00331442	NaN	NaN	NaN			61	1	1	60.1	0.8	0.8	117.91	2.5148	826540000	482500000	344050000	0.728118	0.0736817	0	NaN	O00159-2;I3L204;I3L4D4;I3L3Y6;I3L168;I3L3F5	O00159-2	Unconventional myosin-Ic	MYO1C
0.00776951	-0.0342637	0.242572	NaN	NaN	NaN			8	8	8	21.9	21.9	21.9	46.691	27.938	691880000	402950000	288920000	0.308901	0.0720259	0	NaN	Q96P11;Q96P11-2;Q96P11-4;Q96P11-5;Q96P11-3	Q96P11;Q96P11-2;Q96P11-4;Q96P11-5	Probable 28S rRNA (cytosine-C(5))-methyltransferase	NSUN5
-0.119134	0.147046	0.188021	NaN	NaN	NaN			11	1	1	50.3	6.2	6.2	20.124	3.4993	140420000	83145000	57272000	0.273536	0.0719777	0	NaN	P62913-2	P62913-2	60S ribosomal protein L11	RPL11
NaN	NaN	0.0709388	NaN	NaN	NaN			2	2	2	15.1	15.1	15.1	26.983	4.7173	200070000	106550000	93527000	0	0.0709388	0	NaN	V9GY01;Q9Y448-2;Q9Y448	V9GY01;Q9Y448-2;Q9Y448	Small kinetochore-associated protein	KNSTRN
0.0742315	0.0460021	0.0866479	NaN	NaN	NaN			10	7	7	47.1	32.7	32.7	22.764	24.486	1445700000	813970000	631690000	1.53625	0.0689605	0	NaN	P14649;F8W1I5	P14649;F8W1I5	Myosin light chain 6B	MYL6B
0.138683	-0.18254	0.248413	NaN	NaN	NaN			4	4	4	8.6	8.6	8.6	52.535	8.438	703050000	439230000	263820000	0.186673	0.0681855	0	NaN	O43293;O43293-2	O43293	Death-associated protein kinase 3	DAPK3
0.196103	NaN	-0.0605478	NaN	NaN	NaN			5	5	5	25.5	25.5	25.5	26.55	48.934	384370000	236640000	147720000	0.160743	0.0677778	0	NaN	Q9GZY6;C9JXP0;C9JA24;Q9GZY6-2	Q9GZY6;C9JXP0;C9JA24;Q9GZY6-2	Linker for activation of T-cells family member 2	LAT2
NaN	NaN	0.065848	NaN	NaN	NaN			1	1	1	7.2	7.2	7.2	15.819	2.9237	82049000	47894000	34154000	0	0.065848	0	NaN	Q6P161	Q6P161	39S ribosomal protein L54, mitochondrial	MRPL54
0.0869197	-0.0714213	0.177599	NaN	NaN	NaN			7	7	7	6.6	6.6	6.6	161.31	27.289	419380000	240550000	178830000	0.328175	0.0643658	0	NaN	H0YNH8;Q9BZF9-2;Q9BZF9;F5H2B9;H0YN48;H0YMI1	H0YNH8;Q9BZF9-2;Q9BZF9;F5H2B9	Uveal autoantigen with coiled-coil domains and ankyrin repeats	UACA
0.0668125	0.0318186	0.0903115	NaN	NaN	NaN			6	6	6	13.1	13.1	13.1	59.763	12.266	330370000	191880000	138490000	1.18237	0.0629809	0	NaN	Q92828	Q92828	Coronin-2A	CORO2A
0.0142124	0.634129	-0.461045	NaN	NaN	NaN			10	5	5	5.7	3.6	3.6	213.67	18.152	163440000	101020000	62423000	0.0644436	0.0624321	0	NaN	Q9ULV0;Q7Z7A5;A0A0A0MR36;Q9ULV0-2;K7EPI3;Q9ULV0-3	Q9ULV0;Q7Z7A5	Unconventional myosin-Vb	MYO5B
NaN	1.03478	-0.918224	NaN	NaN	NaN			3	3	3	12.5	12.5	12.5	31.323	10.7	151430000	98392000	53041000	0.0168016	0.0582776	0	NaN	Q53HL2	Q53HL2	Borealin	CDCA8
-0.210095	-0.0509358	0.42975	NaN	NaN	NaN			5	5	5	6.9	6.9	6.9	101.67	13.602	115760000	67897000	47862000	0.0982635	0.0562395	0	NaN	Q9H3U1-2;Q9H3U1;Q9H3U1-3	Q9H3U1-2;Q9H3U1	Protein unc-45 homolog A	UNC45A
0.0786098	0.204016	-0.138584	NaN	NaN	NaN			11	11	11	65.4	65.4	65.4	23.354	135.17	2676100000	1782100000	894000000	0.1683	0.0480136	0	NaN	O00161;O00161-2;H3BM38;H3BNE1;H3BR18;H3BPJ0;H3BV99;H3BP15;H3BQY9;H3BNG6;H3BU94;H3BR99	O00161;O00161-2;H3BM38;H3BNE1;H3BR18;H3BPJ0	Synaptosomal-associated protein 23;Synaptosomal-associated protein	SNAP23
-0.250131	0.275007	0.111432	NaN	NaN	NaN			8	5	5	27.1	18.1	18.1	40.086	23.517	657780000	403940000	253840000	0.0984235	0.045436	0	NaN	P09471-2;P09471;H3BTM2;H3BN82;A0A087WTB6;H3BQG8;A2A2R6;Q5JWD1;H0Y7E8;A0A087WZE5;P38405;P38405-2	P09471-2;P09471;H3BTM2	Guanine nucleotide-binding protein G(o) subunit alpha	GNAO1
NaN	NaN	0.0378742	NaN	NaN	NaN			3	3	3	19	19	19	22.488	2.3431	34503000	22002000	12501000	0	0.0378742	0	NaN	A0A0C4DFM9;Q9BUZ4-2;Q9BUZ4;J9JIG0;F6SA91;K7EJG7;K7ER49;Q2KJU6;C9JJ10	A0A0C4DFM9;Q9BUZ4-2;Q9BUZ4;J9JIG0;F6SA91	TNF receptor-associated factor 4	TRAF4
0.0869197	0.0103502	0.0107799	NaN	NaN	NaN			16	16	16	12.7	12.7	12.7	198.56	57.369	1624000000	402120000	1221900000	0.533615	0.0360166	0	NaN	Q702N8;Q702N8-2;Q702N8-3	Q702N8;Q702N8-2	Xin actin-binding repeat-containing protein 1	XIRP1
NaN	-0.254341	0.316725	NaN	NaN	NaN			5	5	5	19.9	19.9	19.9	42.932	25.315	233080000	131090000	101990000	0.0311765	0.031192	0	NaN	A4D1E9;A4D1E9-2;C9J8R7;C9JNI1;C9JEQ8	A4D1E9;A4D1E9-2;C9J8R7;C9JNI1	GTP-binding protein 10	GTPBP10
NaN	NaN	0.0251707	NaN	NaN	NaN			2	2	2	32.9	32.9	32.9	9.5086	37.538	23647000	15702000	7945500	0	0.0251707	0	NaN	Q96HQ2-2;Q96HQ2	Q96HQ2-2;Q96HQ2	CDKN2AIP N-terminal-like protein	CDKN2AIPNL
0.0749164	0.0416635	-0.0487107	NaN	NaN	NaN			5	3	3	9.7	6.5	6.5	61.163	37.608	498540000	299810000	198730000	0.219989	0.0226231	0	NaN	A0A087WXZ3;Q9Y5A9;Q9Y5A9-2;S4R3V3;S4R3J8	A0A087WXZ3;Q9Y5A9;Q9Y5A9-2	YTH domain-containing family protein 2	YTHDF2
-0.0402595	0.0746424	0.0291349	NaN	NaN	NaN			3	3	3	24.2	24.2	24.2	16.996	6.5339	75856000	46908000	28948000	0.228379	0.0211726	0	NaN	C9JLU1;P52434;P52434-4;P52434-3;P52434-2	C9JLU1;P52434;P52434-4;P52434-3	DNA-directed RNA polymerases I, II, and III subunit RPABC3	POLR2H
-0.128298	-0.081278	0.245739	NaN	NaN	NaN			6	6	6	20.8	20.8	20.8	39.542	17.796	615060000	222310000	392760000	0.03258	0.0120543	0	NaN	Q8WVM0	Q8WVM0	Dimethyladenosine transferase 1, mitochondrial	TFB1M
NaN	NaN	0.00906043	NaN	NaN	NaN			3	3	3	5.9	5.9	5.9	80.702	15.323	187610000	123590000	64026000	0	0.00906043	0	NaN	Q13724-2;Q13724;C9J8D4;C9JDQ1	Q13724-2;Q13724;C9J8D4	Mannosyl-oligosaccharide glucosidase	MOGS
0.118758	-0.045357	-0.0474577	NaN	NaN	NaN			10	10	10	30.1	30.1	30.1	46.494	61.966	2177400000	1302700000	874750000	0.0507978	0.00864791	0	NaN	A0A0C4DGG1;Q9UKS6;E9PIY1;E9PJ75;E9PNM9;E9PJ33;H0YDM6	A0A0C4DGG1;Q9UKS6;E9PIY1;E9PJ75;E9PNM9	Protein kinase C and casein kinase substrate in neurons protein 3	PACSIN3
-0.316241	0.218843	0.108759	NaN	NaN	NaN			7	7	7	3.5	3.5	3.5	241.26	15.802	238100000	137190000	100910000	0.00718688	0.00378703	0	NaN	A5YKK6-3;A5YKK6-2;A5YKK6;A5YKK6-4;H3BR89;H3BVC9;H3BMH0;B5MDN3;H3BMZ2	A5YKK6-3;A5YKK6-2;A5YKK6;A5YKK6-4	CCR4-NOT transcription complex subunit 1	CNOT1
0.332622	-0.344135	0.0187766	NaN	NaN	NaN			9	9	9	20.7	20.7	20.7	59.58	21.241	464310000	282300000	182010000	0.00381901	0.0024211	0	NaN	Q9NUL7	Q9NUL7	Probable ATP-dependent RNA helicase DDX28	DDX28
0.0551957	0.144046	-0.232667	NaN	NaN	NaN			6	6	6	10.3	10.3	10.3	69.725	13.221	524310000	319810000	204500000	0.0311106	-0.0111417	0	NaN	Q13772;Q13772-3;Q13772-4;B4DF87;B4DZ85;Q13772-2	Q13772;Q13772-3;Q13772-4;B4DF87;B4DZ85	Nuclear receptor coactivator 4	NCOA4
-0.148129	0.142479	-0.0395328	NaN	NaN	NaN			6	6	6	25.9	25.9	25.9	29.247	18.522	851160000	560250000	290910000	0.0578124	-0.015061	0	NaN	P15927;P15927-2;P15927-3;Q5TEJ7;Q5TEJ0	P15927;P15927-2;P15927-3;Q5TEJ7	Replication protein A 32 kDa subunit	RPA2
-0.262798	0.270947	-0.0538681	NaN	NaN	NaN			7	7	7	19.2	19.2	19.2	42.026	14.742	793550000	522670000	270880000	0.0311568	-0.0152395	0	NaN	O00622;A0A087WVM3	O00622;A0A087WVM3	Protein CYR61	CYR61
NaN	NaN	-0.0237684	NaN	NaN	NaN			2	2	2	18.8	18.8	18.8	15.139	3.4562	20410000	12388000	8022400	0	-0.0237684	0	NaN	O60783	O60783	28S ribosomal protein S14, mitochondrial	MRPS14
0.275603	-0.346206	-0.00620245	NaN	NaN	NaN			3	3	3	11.1	11.1	11.1	25.697	2.6028	131180000	81169000	50013000	0.0458538	-0.0256019	0	NaN	Q9P016;Q9P016-2	Q9P016	Thymocyte nuclear protein 1	THYN1
0.0847447	-0.230381	0.0569996	NaN	NaN	NaN			11	11	11	16	16	16	110.24	64.612	1594000000	1062300000	531650000	0.0985794	-0.0295454	0	NaN	Q5M775-4;Q5M775;Q5M775-5;Q5M775-3;Q5M775-2;J3KSG2;J3KRN9;J3QQM0;J3QS22	Q5M775-4;Q5M775;Q5M775-5;Q5M775-3;Q5M775-2	Cytospin-B	SPECC1
NaN	-0.174898	0.115699	NaN	NaN	NaN			3	3	3	32.2	32.2	32.2	17.138	29.266	188920000	167690000	21226000	0.0594528	-0.0295995	0	NaN	P61088;F8VQQ8;Q5JXB2;F8VZ29;F8VSD4;F8VV71	P61088;F8VQQ8;Q5JXB2	Ubiquitin-conjugating enzyme E2 N;Putative ubiquitin-conjugating enzyme E2 N-like	UBE2N;UBE2NL
-0.0493076	-0.0550516	0.0127833	NaN	NaN	NaN			8	8	8	17.3	17.3	17.3	54.392	19.641	596170000	362750000	233420000	0.530077	-0.0305253	0	NaN	Q9UQ03-2;Q9UQ03	Q9UQ03-2;Q9UQ03	Coronin-2B	CORO2B
0.00374607	NaN	-0.0843949	NaN	NaN	NaN			4	4	4	21.1	21.1	21.1	27.571	29.925	256540000	156480000	100060000	0.277169	-0.0403244	0	NaN	H0Y9X1;Q96EY4;D6RA57;D6RE67;D6RC31	H0Y9X1;Q96EY4;D6RA57	Translation machinery-associated protein 16	TMA16
NaN	0.395831	-0.491754	NaN	NaN	NaN			7	7	7	28.5	28.5	28.5	25.465	9.0875	274960000	195870000	79099000	0.0308334	-0.0479616	0	NaN	Q00059-2;Q00059;H7BYN3	Q00059-2;Q00059;H7BYN3	Transcription factor A, mitochondrial	TFAM
0.103934	-0.247114	-0.0070576	NaN	NaN	NaN			17	17	17	10.7	10.7	10.7	202.06	70.853	1226200000	730580000	495610000	0.169697	-0.0500793	0	NaN	Q8TDM6-4;Q8TDM6;Q8TDM6-2;A0A0A0MSL1;Q8TDM6-3;A0A0J9YYG8;Q8TDM6-5	Q8TDM6-4;Q8TDM6;Q8TDM6-2;A0A0A0MSL1	Disks large homolog 5	DLG5
-0.0599912	-0.0630172	-0.0299857	NaN	NaN	NaN			5	5	5	36.8	36.8	36.8	8.496	19.467	2371100000	1493400000	877660000	1.39603	-0.050998	0	NaN	P62308;A8MWD9;Q49AN9;F5H013;C9JVQ0	P62308;A8MWD9;Q49AN9;F5H013;C9JVQ0	Small nuclear ribonucleoprotein G;Putative small nuclear ribonucleoprotein G-like protein 15	SNRPG;SNRPGP15
-0.062731	NaN	NaN	NaN	NaN	NaN			3	3	3	5.5	5.5	5.5	69.697	2.3392	149580000	83112000	66470000	0	-0.062731	0	NaN	E7EX17;P23588-2;P23588;F8W0K0;F8VSC7;F8VP89;F8VRU1;F8VYE9;F8VX11	E7EX17;P23588-2;P23588;F8W0K0;F8VSC7;F8VP89	Eukaryotic translation initiation factor 4B	EIF4B
-0.325142	0.189666	-0.0691794	NaN	NaN	NaN			9	9	9	9.1	9.1	9.1	132.71	25.649	434740000	262470000	172270000	0.160352	-0.0682182	0	NaN	Q5JTH9-2;Q5JTH9-3;Q5JTH9;A0A087X0G0	Q5JTH9-2;Q5JTH9-3;Q5JTH9	RRP12-like protein	RRP12
NaN	-0.0688616	NaN	NaN	NaN	NaN			3	3	3	1	1	1	405.8	3.5702	32293000	19577000	12716000	0	-0.0688616	0	NaN	H0Y4W2;F2Z2U4;Q9Y4A5-2;Q9Y4A5	H0Y4W2;F2Z2U4;Q9Y4A5-2;Q9Y4A5	Transformation/transcription domain-associated protein	TRRAP
-0.120953	-0.0179574	NaN	NaN	NaN	NaN			5	5	5	9.5	9.5	9.5	64.804	19.368	212940000	134860000	78072000	0.391293	-0.0694552	0	NaN	Q9UGN5-2;Q9UGN5;G3V167;H0YH02	Q9UGN5-2;Q9UGN5;G3V167	Poly [ADP-ribose] polymerase 2	PARP2
-0.118007	-0.60931	0.489543	NaN	NaN	NaN			3	3	3	8	8	8	56.547	5.3131	142690000	99705000	42980000	0.0828455	-0.079258	0	NaN	Q96GM8;Q96GM8-2	Q96GM8;Q96GM8-2	Target of EGR1 protein 1	TOE1
-0.0433188	-0.176544	-0.0199016	NaN	NaN	NaN			6	6	6	41.2	41.2	41.2	18.742	31.672	231640000	150640000	80993000	0.61437	-0.0799215	0	NaN	P62633-2;P62633;P62633-7;P62633-3;P62633-8;P62633-5;P62633-4;P62633-6	P62633-2;P62633;P62633-7;P62633-3;P62633-8;P62633-5;P62633-4;P62633-6	Cellular nucleic acid-binding protein	CNBP
0.00201835	-0.297218	0.0549179	NaN	NaN	NaN			9	9	9	29.8	29.8	29.8	40.556	48.792	755700000	438040000	317660000	0.26678	-0.080094	0	NaN	P40938;P40938-2;A0A087X270	P40938;P40938-2	Replication factor C subunit 3	RFC3
0.0304067	-0.0690583	-0.204715	NaN	NaN	NaN			8	2	2	54.7	12.2	12.2	19.827	9.5189	262800000	183860000	78939000	0.448555	-0.0811223	0	NaN	P24844;P24844-2;J3KTJ1	P24844;P24844-2;J3KTJ1	Myosin regulatory light polypeptide 9	MYL9;MYL12A
0.159758	-0.342671	-0.061255	NaN	NaN	NaN			3	3	3	10	10	10	42.592	8.836	252870000	154130000	98736000	0.199322	-0.0813892	0	NaN	P39748;F5H1Y3;P39748-2;I3L3E9	P39748;F5H1Y3;P39748-2	Flap endonuclease 1	FEN1
-0.0556663	-0.10729	-0.0847468	NaN	NaN	NaN			12	12	12	49.3	49.3	49.3	26.228	56.086	4347900000	2798200000	1549700000	1.5055	-0.0825678	0	NaN	C9J384;Q9BQ75-2;Q9BQ75;H7C515	C9J384;Q9BQ75-2;Q9BQ75	Protein CMSS1	CMSS1
NaN	-0.354151	0.18574	NaN	NaN	NaN			3	3	3	5.1	5.1	5.1	70.973	6.277	136790000	88076000	48717000	0.0928548	-0.0842056	0	NaN	Q14258	Q14258	E3 ubiquitin/ISG15 ligase TRIM25	TRIM25
NaN	0.407733	-0.578736	NaN	NaN	NaN			2	2	2	19.8	19.8	19.8	11.972	6.6407	6424500000	5439100000	985380000	0.0502545	-0.0855015	0	NaN	F5GX77;Q9UI30-2;Q9UI30;F5GYQ2	F5GX77;Q9UI30-2;Q9UI30;F5GYQ2	Multifunctional methyltransferase subunit TRM112-like protein	TRMT112
0.0471196	-0.314589	0.010923	NaN	NaN	NaN			7	7	7	7.8	7.8	7.8	128.18	18.561	320470000	206510000	113960000	0.271938	-0.0855155	0	NaN	P35251-2;P35251;H0Y8U4	P35251-2;P35251	Replication factor C subunit 1	RFC1
-0.0797525	-0.0910641	-0.0894669	NaN	NaN	NaN	+		7	7	6	22.7	22.7	21.3	54.234	30.655	8032100000	4973600000	3058500000	2.78106	-0.0867612	0	NaN	Q9BR76;A0A087WW53;F5H390;F5H0D2	Q9BR76	Coronin-1B	CORO1B
NaN	-0.0405414	-0.139919	NaN	NaN	NaN			5	5	5	10.8	10.8	10.8	52.22	10.887	221180000	91099000	130080000	0.494231	-0.0902303	0	NaN	P60228;E5RHS5;E5RGA2;E5RIP5;E5RJ25;H0YBP5;E5RII3;H0YAW4;H0YBR5	P60228;E5RHS5;E5RGA2	Eukaryotic translation initiation factor 3 subunit E	EIF3E
0.0973411	0.177344	-0.547067	NaN	NaN	NaN			8	8	8	11.7	11.7	11.7	87.081	17.946	332820000	208330000	124490000	0.136449	-0.0907941	0	NaN	Q9Y446;Q9Y446-2;E9PKC4;E9PJR7;E9PRW6;E9PK71;E9PQ15	Q9Y446;Q9Y446-2	Plakophilin-3	PKP3
-0.136125	-0.0147182	-0.121722	NaN	NaN	NaN			2	2	2	2.6	2.6	2.6	98.935	2.2519	594360000	383470000	210880000	0.850701	-0.0908551	0	NaN	Q86VV8-4;Q86VV8-3;Q86VV8;J3KTD2;J3KT00;Q86VV8-2	Q86VV8-4;Q86VV8-3;Q86VV8;J3KTD2;J3KT00;Q86VV8-2	Rotatin	RTTN
0.0787465	-0.360546	0.00417777	NaN	NaN	NaN			4	4	4	1.6	1.6	1.6	300.44	28.419	650300000	404900000	245410000	0.24741	-0.0925404	0	NaN	P25054-2;P25054;E9PFT7;H3BNH8;R4GMU6;B7Z2B6	P25054-2;P25054;E9PFT7	Adenomatous polyposis coli protein	APC
NaN	-0.23926	0.0443242	NaN	NaN	NaN			2	2	2	20.4	20.4	20.4	12.77	5.4446	47026000	19766000	27260000	0.209986	-0.0974677	0	NaN	F5H702;Q96GC5-3;Q96GC5	F5H702;Q96GC5-3;Q96GC5	39S ribosomal protein L48, mitochondrial	MRPL48
NaN	-0.191261	-0.0102942	NaN	NaN	NaN			2	2	2	5.1	5.1	5.1	52.356	5.552	202670000	125110000	77563000	0.33183	-0.100777	0	NaN	O95363	O95363	Phenylalanine--tRNA ligase, mitochondrial	FARS2
NaN	NaN	-0.101428	NaN	NaN	NaN			3	3	3	14.2	14.2	14.2	38.938	12.078	67548000	40138000	27411000	0	-0.101428	0	NaN	O75319	O75319	RNA/RNP complex-1-interacting phosphatase	DUSP11
NaN	NaN	-0.106296	NaN	NaN	NaN			3	3	3	9.6	9.6	9.6	30.477	8.11	198960000	129090000	69873000	0	-0.106296	0	NaN	Q8N567	Q8N567	Zinc finger CCHC domain-containing protein 9	ZCCHC9
-0.160202	-0.226679	0.0571383	NaN	NaN	NaN			3	3	3	42	42	42	8.85	6.8337	146570000	77991000	68574000	0.483824	-0.109914	0	NaN	Q8WVC2;P63220;Q9BYK1;Q9BYK2	Q8WVC2;P63220;Q9BYK1	40S ribosomal protein S21	RPS21
-0.114301	NaN	NaN	NaN	NaN	NaN			3	3	3	0.8	0.8	0.8	399.73	1.8708	386320000	217820000	168500000	0	-0.114301	0	NaN	O15230	O15230	Laminin subunit alpha-5	LAMA5
-0.120341	NaN	NaN	NaN	NaN	NaN			2	2	2	2.1	2.1	2.1	118.72	4.2194	157910000	80625000	77289000	0	-0.120341	0	NaN	Q9P2N5;U3KPZ7	Q9P2N5;U3KPZ7	RNA-binding protein 27	RBM27
0.0192037	-0.331173	-0.0513244	NaN	NaN	NaN			24	24	19	12.6	12.6	11	304.1	134.03	1557400000	983250000	574160000	0.425797	-0.121098	0	NaN	Q14573	Q14573	Inositol 1,4,5-trisphosphate receptor type 3	ITPR3
-0.248673	-0.154683	0.0380147	NaN	NaN	NaN			5	5	5	34	34	34	22.083	36.921	813050000	531210000	281840000	0.544024	-0.12178	0	NaN	Q9BRJ6;H7C0T1;H7C2R9;C9JQV0	Q9BRJ6;H7C0T1;H7C2R9;C9JQV0	Uncharacterized protein C7orf50	C7orf50
NaN	NaN	-0.12301	NaN	NaN	NaN			3	3	3	13.9	13.9	13.9	28.449	13.799	84499000	52085000	32415000	0	-0.12301	0	NaN	Q9NX20;E9PI14	Q9NX20	39S ribosomal protein L16, mitochondrial	MRPL16
0.0803847	0.081476	-0.540484	NaN	NaN	NaN			5	5	5	10.5	10.5	10.5	51.893	11.45	988900000	632970000	355930000	0.218729	-0.126208	0	NaN	Q86X51	Q86X51	Uncharacterized protein CXorf67	CXorf67
-0.128077	NaN	NaN	NaN	NaN	NaN			1	1	1	1.1	1.1	1.1	114.71	2.7455	35881000	22432000	13449000	0	-0.128077	0	NaN	Q99575	Q99575	Ribonucleases P/MRP protein subunit POP1	POP1
-0.194262	-0.231125	0.0193461	NaN	NaN	NaN			6	6	6	5.7	5.7	5.7	136.14	12.322	177540000	113510000	64033000	0.647556	-0.135347	0	NaN	E9PHV5;P28290-2;P28290;E7EUL7;P28290-3;H7BZ26	E9PHV5;P28290-2;P28290;E7EUL7;P28290-3	Sperm-specific antigen 2	SSFA2
NaN	-0.104542	-0.176952	NaN	NaN	NaN			3	3	3	16.6	16.6	16.6	42.07	43.114	277530000	182750000	94779000	0.795108	-0.140747	0	NaN	Q9BX40;Q5TBQ1;Q5TBP9;Q9BX40-2;A0A0C4DFV2;Q5TBQ0;Q9BX40-3	Q9BX40;Q5TBQ1;Q5TBP9;Q9BX40-2	Protein LSM14 homolog B	LSM14B
0.0951818	0.0852886	-0.610676	NaN	NaN	NaN			7	7	7	36.1	36.1	36.1	21.225	37.868	2235600000	1489800000	745800000	0.220478	-0.143402	0	NaN	P02794;G3V1D1;G3V192;E9PRK8;E9PKY7;E9PQR3;E9PPQ4;E9PKM5;E9PK45	P02794;G3V1D1;G3V192	Ferritin heavy chain;Ferritin heavy chain, N-terminally processed;Ferritin	FTH1
-0.0900656	-0.138156	-0.207228	NaN	NaN	NaN			7	7	7	41.9	41.9	41.9	18.565	37.934	3400800000	2220600000	1180200000	1.29469	-0.14515	0	NaN	P46778;G3V1B3;M0R181;M0R3I5	P46778;G3V1B3;M0R181	60S ribosomal protein L21	RPL21
-0.118273	0.132906	-0.467713	NaN	NaN	NaN			7	7	7	4	4	4	210.13	19.302	348990000	218360000	130630000	0.32125	-0.151027	0	NaN	A6NNN6;E7ETA6;Q15154-2;Q15154;H0YBA1;E5RGQ4;E9PGW9;E7EV93;Q15154-3	A6NNN6;E7ETA6;Q15154-2;Q15154;H0YBA1	Pericentriolar material 1 protein	PCM1
-0.0981657	NaN	-0.207394	NaN	NaN	NaN			3	3	3	28.9	28.9	28.9	13.569	4.7354	44869000	29367000	15501000	0.660428	-0.15278	0	NaN	P35244;B5MC59	P35244;B5MC59	Replication protein A 14 kDa subunit	RPA3
0.224534	NaN	-0.538807	NaN	NaN	NaN			3	3	3	5.8	5.8	5.8	85.652	13.666	128680000	80941000	47734000	0.12415	-0.157136	0	NaN	Q9ULW0;Q9ULW0-2	Q9ULW0;Q9ULW0-2	Targeting protein for Xklp2	TPX2
-0.234431	NaN	-0.0831718	NaN	NaN	NaN			9	5	2	27	18.2	8.8	42.835	39.428	298740000	193460000	105270000	0.548277	-0.158802	0	NaN	F8W8I6;P31483;P31483-3;E5RGV5;E5RG67	F8W8I6;P31483;P31483-3;E5RGV5;E5RG67	Nucleolysin TIA-1 isoform p40	TIA1
-0.0612249	-0.262434	NaN	NaN	NaN	NaN			3	3	3	6.6	6.6	6.6	76.968	54.015	377980000	253710000	124280000	0.450888	-0.16183	0	NaN	A0A0A0MTR1;P55290;P55290-4;A0A087X0X6;P55290-5;P55290-3;P55290-2	A0A0A0MTR1;P55290;P55290-4;A0A087X0X6;P55290-5	Cadherin-13	CDH13
-0.15793	-0.153077	-0.182999	NaN	NaN	NaN	+		6	6	6	36.8	36.8	36.8	13.293	13.04	1771800000	1168200000	603580000	2.50098	-0.164669	0	NaN	P49207	P49207	60S ribosomal protein L34	RPL34
-0.152965	-0.110667	-0.238493	NaN	NaN	NaN			5	5	5	21.8	21.8	21.8	23.134	42.41	2542300000	1719100000	823200000	1.32851	-0.167375	0	NaN	J3QR09;J3KTE4;P84098;J3QL15	J3QR09;J3KTE4;P84098;J3QL15	Ribosomal protein L19;60S ribosomal protein L19	RPL19
-0.127148	NaN	-0.207794	NaN	NaN	NaN			1	1	1	14.9	14.9	14.9	11.502	7.3865	58187000	36510000	21677000	0.822692	-0.167471	0	NaN	H0Y6D8;Q32MN6;P20226-2;P20226	H0Y6D8;Q32MN6;P20226-2;P20226	TATA-box-binding protein	TBP
-0.160669	-0.154394	-0.199487	NaN	NaN	NaN	+		4	4	2	24.5	24.5	9.4	12.469	6.9288	215610000	142890000	72722000	2.17442	-0.171517	0	NaN	Q969Q0	Q969Q0	60S ribosomal protein L36a-like	RPL36AL
NaN	-0.17441	NaN	NaN	NaN	NaN			1	1	1	2	2	2	96.557	3.2058	19025000	10548000	8476700	0	-0.17441	0	NaN	Q8IY81	Q8IY81	pre-rRNA processing protein FTSJ3	FTSJ3
-0.265431	-0.144744	-0.116958	NaN	NaN	NaN			10	6	4	4	2.7	2	308.06	10.707	149070000	91815000	57253000	1.21354	-0.175711	0	NaN	Q14571	Q14571	Inositol 1,4,5-trisphosphate receptor type 2	ITPR2
NaN	-0.0980577	-0.262175	NaN	NaN	NaN			144	1	1	68.9	1.2	1.2	251.39	81.328	500890000	310920000	189970000	0.565194	-0.180116	0	NaN	Q01082-3	Q01082-3	Spectrin beta chain, non-erythrocytic 1	SPTBN1
-0.254289	0.0243196	-0.341044	NaN	NaN	NaN			7	7	7	15.9	15.9	15.9	74.823	24.225	654850000	429210000	225640000	0.645304	-0.190338	0	NaN	O75326;O75326-2;F5GYX3;H3BMF9	O75326;O75326-2;F5GYX3	Semaphorin-7A	SEMA7A
-0.103209	-0.317589	-0.158977	NaN	NaN	NaN			12	12	11	21.5	21.5	20.5	86.082	77.574	1142700000	708530000	434120000	1.02252	-0.193258	0	NaN	Q96II8;Q96II8-3;Q96II8-4;Q96II8-2;E9PD99;H7C1G3;H7C0J8	Q96II8;Q96II8-3;Q96II8-4;Q96II8-2;E9PD99	Leucine-rich repeat and calponin homology domain-containing protein 3	LRCH3
-0.302849	NaN	-0.0906493	NaN	NaN	NaN			4	4	4	15.3	15.3	15.3	36.514	14.922	477650000	318860000	158790000	0.501898	-0.196749	0	NaN	X6RGJ2;Q5SSJ5;B0QZK9;B0QZK8;B0QZK4;Q5SWC8;Q5SSJ5-5;Q5SSJ5-3;Q5SSJ5-2	X6RGJ2;Q5SSJ5;B0QZK9;B0QZK8;B0QZK4;Q5SWC8;Q5SSJ5-5;Q5SSJ5-3;Q5SSJ5-2	Heterochromatin protein 1-binding protein 3	HP1BP3
-0.173742	-0.0793103	-0.346793	NaN	NaN	NaN			2	2	2	10.7	10.7	10.7	15.847	3.3344	135730000	91852000	43879000	0.902238	-0.199949	0	NaN	Q9UKK6;Q9NPJ8;Q9NPJ8-2;Q9NPJ8-3;Q9NPJ8-4	Q9UKK6;Q9NPJ8;Q9NPJ8-2;Q9NPJ8-3;Q9NPJ8-4	NTF2-related export protein 1;NTF2-related export protein 2	NXT1;NXT2
-0.183621	-0.320522	-0.125006	NaN	NaN	NaN			7	7	5	18.8	18.8	15.6	60.873	13.606	1056200000	663510000	392710000	1.16401	-0.209717	0	NaN	Q9BYJ9;A0A024R7W5;A0A087X0Q1;A0A087WY31;Q7Z739;Q9BYJ9-2	Q9BYJ9	YTH domain-containing family protein 1	YTHDF1
NaN	-0.0844867	-0.344575	NaN	NaN	NaN			5	5	5	28.3	28.3	28.3	21.809	7.7797	188030000	104330000	83701000	0.459763	-0.214531	0	NaN	K7EIN2;Q9BRJ7;K7ENA3;W4VSQ8;Q9BRJ7-2	K7EIN2;Q9BRJ7	Protein syndesmos	NUDT16L1
-0.243779	-0.137965	-0.264668	NaN	NaN	NaN			8	8	7	23.7	23.7	21.8	47.355	24.782	520640000	323170000	197460000	1.50073	-0.215471	0	NaN	O75955;O75955-2;A2AB13;A2AB11;A0A0G2JJQ6;A2AB12;A2AB10;A2AB09	O75955;O75955-2;A2AB13;A2AB11;A0A0G2JJQ6;A2AB12;A2AB10;A2AB09	Flotillin-1	FLOT1
NaN	NaN	-0.21838	NaN	NaN	NaN			2	2	2	5.1	5.1	5.1	55.697	5.7194	138190000	90506000	47688000	0	-0.21838	0	NaN	E7EMV7;A0A0A0MRZ4;Q15025-7;Q15025-8;Q15025-5;Q15025-6;Q15025-4;Q15025-3;Q15025-2;Q15025;H0YC17;E7EW15	E7EMV7;A0A0A0MRZ4;Q15025-7;Q15025-8;Q15025-5;Q15025-6;Q15025-4;Q15025-3;Q15025-2;Q15025;H0YC17;E7EW15	TNFAIP3-interacting protein 1	TNIP1
-0.459774	-0.123607	-0.0868751	NaN	NaN	NaN			5	5	5	7.8	7.8	7.8	90.725	30.459	329890000	207560000	122330000	0.69809	-0.223419	0	NaN	P11387;E5RIC7;Q969P6-2;Q969P6;E5RJ95;E5RFS0	P11387	DNA topoisomerase 1	TOP1
-0.146787	-0.498566	-0.0315037	NaN	NaN	NaN			7	7	7	13.3	13.3	13.3	72.531	21.429	484790000	272340000	212450000	0.602975	-0.225619	0	NaN	E9PQ61;O75152;E9PBY7	E9PQ61;O75152;E9PBY7	Zinc finger CCCH domain-containing protein 11A	ZC3H11A
-0.185031	-0.0479796	-0.448666	NaN	NaN	NaN			3	3	3	16.7	16.7	16.7	32.85	103.27	774030000	511320000	262710000	0.714452	-0.227226	0	NaN	F6X2W2;Q7Z3B1;Q7Z3B1-2	F6X2W2;Q7Z3B1	Neuronal growth regulator 1	NEGR1
-0.229805	-0.225295	-0.227	NaN	NaN	NaN	+		3	3	3	26	26	26	14.551	9.2941	792680000	513120000	279550000	4.47574	-0.227367	0	NaN	P42766;F2Z388	P42766;F2Z388	60S ribosomal protein L35	RPL35
-0.236894	-0.223424	NaN	NaN	NaN	NaN			2	2	2	0.9	0.9	0.9	480.19	2.462	1230700000	839500000	391180000	1.72993	-0.230159	0	NaN	Q7Z6Z7-2;Q7Z6Z7-3;Q7Z6Z7	Q7Z6Z7-2;Q7Z6Z7-3;Q7Z6Z7	E3 ubiquitin-protein ligase HUWE1	HUWE1
-0.230482	NaN	NaN	NaN	NaN	NaN			1	1	1	9.6	9.6	9.6	15.434	10.242	45074000	32242000	12832000	0	-0.230482	0	NaN	Q86WX3	Q86WX3	Active regulator of SIRT1	RPS19BP1
NaN	NaN	-0.235535	NaN	NaN	NaN			2	2	2	1.6	1.6	1.6	130.46	2.0542	10769000	7434800	3333900	0	-0.235535	0	NaN	D6RBW0;A0A087X0P0;Q02224-3;Q02224-2;Q02224	D6RBW0;A0A087X0P0;Q02224-3;Q02224-2;Q02224	Kinesin-like protein;Centromere-associated protein E	CENPE
-0.198742	NaN	-0.296279	NaN	NaN	NaN			3	3	2	4.9	4.9	3.6	76.039	7.5159	572650000	374190000	198470000	0.907102	-0.247511	0	NaN	H3BLV9;Q5R363;Q96SB4-4;Q96SB4;Q96SB4-3;H7C2I2;A8MPP7;A8MPY5;E7ETV6;Q9UPE1-2;Q9UPE1-3;Q9UPE1-4;Q9UPE1	H3BLV9;Q5R363;Q96SB4-4;Q96SB4;Q96SB4-3	SRSF protein kinase 1	SRPK1
-0.189137	-0.0927863	-0.46953	NaN	NaN	NaN			3	3	3	29.6	29.6	29.6	11.985	27.573	5206800000	3635000000	1571900000	0.804217	-0.250484	0	NaN	E9PNW4;E9PR17;P13987;H0YET2	E9PNW4;E9PR17;P13987	CD59 glycoprotein	CD59
-0.341592	-0.097718	-0.330629	NaN	NaN	NaN			11	11	11	56.2	56.2	56.2	36.567	323.31	4459500000	2984200000	1475300000	1.07528	-0.256646	0	NaN	Q96IZ0;H0YHP5;H0YI16;A0A0B4J260;F8W1M8	Q96IZ0	PRKC apoptosis WT1 regulator protein	PAWR
-0.231346	-0.352105	-0.186557	NaN	NaN	NaN			16	16	16	45.1	45.1	45.1	29.995	152.3	12817000000	8297700000	4519000000	1.454	-0.256669	0	NaN	P62424;Q5T8U2;Q5T8U3	P62424;Q5T8U2;Q5T8U3	60S ribosomal protein L7a	RPL7A
-0.341446	-0.174605	-0.261812	NaN	NaN	NaN			3	3	3	25.5	25.5	25.5	17.041	27.55	2525000000	1730500000	794520000	1.48365	-0.259287	0	NaN	E9PIM6;E9PNQ8;P04216;J3QRJ3	E9PIM6;E9PNQ8;P04216;J3QRJ3	Thy-1 membrane glycoprotein	THY1
-0.250543	-0.190306	-0.337157	NaN	NaN	NaN			9	9	9	20.7	20.7	20.7	76.107	49.796	725730000	461300000	264420000	1.58568	-0.259335	0	NaN	O43823;M0QYL4	O43823	A-kinase anchor protein 8	AKAP8
-0.319586	NaN	-0.199686	NaN	NaN	NaN			5	3	3	8.1	4.4	4.4	82.226	7.4341	144310000	100080000	44231000	0.840242	-0.259636	0	NaN	A0A087WVC1;Q9BQ39	A0A087WVC1;Q9BQ39	ATP-dependent RNA helicase DDX50	DDX50
-0.273605	NaN	NaN	NaN	NaN	NaN			3	3	3	14.2	14.2	14.2	41.167	28.34	47204000	27015000	20188000	0	-0.273605	0	NaN	P62191-2;P62191	P62191-2;P62191	26S protease regulatory subunit 4	PSMC1
-0.368942	-0.378663	-0.0889451	NaN	NaN	NaN			9	9	9	46.6	46.6	46.6	24.146	30.166	3653200000	2416800000	1236500000	1.00393	-0.27885	0	NaN	P61313;E7EQV9;E7ENU7;E7EX53;P61313-2;E7ERA2	P61313;E7EQV9;E7ENU7;E7EX53	60S ribosomal protein L15;Ribosomal protein L15	RPL15
-0.203901	-0.128693	-0.536064	NaN	NaN	NaN			4	4	4	20.6	20.6	20.6	26.671	29.76	944190000	509880000	434310000	0.833343	-0.289552	0	NaN	Q9UNN8;A0A0U1RQQ4;A0A0U1RRC4	Q9UNN8;A0A0U1RQQ4	Endothelial protein C receptor	PROCR
-0.359324	-0.208178	-0.307894	NaN	NaN	NaN			13	13	13	37.8	37.8	37.8	32.728	75.617	4867100000	3127100000	1740000000	1.65078	-0.291798	0	NaN	Q02878;F8VZ45;U3KQR5;F8VR69;F8VZA3;F8VWR1;F8VU16	Q02878	60S ribosomal protein L6	RPL6
NaN	-0.294137	NaN	NaN	NaN	NaN			4	4	4	2.7	2.7	2.7	192.07	3.8576	20165000	13370000	6794900	0	-0.294137	0	NaN	Q14669-4;Q14669;Q14669-2;Q14669-3;H7C2Y1	Q14669-4;Q14669;Q14669-2;Q14669-3	E3 ubiquitin-protein ligase TRIP12	TRIP12
-0.124912	-0.35124	-0.40855	NaN	NaN	NaN			4	4	4	14.1	14.1	14.1	37.898	18.043	502560000	325870000	176690000	1.11658	-0.294901	0	NaN	C9JP00;A0A0A0MQX8;Q9NR56;Q9NR56-3;Q9NR56-4;Q9NR56-7;Q9NR56-6;Q9NR56-2;Q9NR56-5;O95205;H7C4T5;Q5VZF2-3;Q5VZF2-2;Q5VZF2;B1AKI6;Q86VM6;Q9NUK0-2;Q9NUK0	C9JP00;A0A0A0MQX8;Q9NR56;Q9NR56-3;Q9NR56-4;Q9NR56-7;Q9NR56-6;Q9NR56-2;Q9NR56-5;O95205;H7C4T5;Q5VZF2-3;Q5VZF2-2;Q5VZF2	Muscleblind-like protein 1;Muscleblind-like protein 2	MBNL1;MBLL;MBNL2
-0.299578	-0.140619	-0.452155	NaN	NaN	NaN			5	5	3	12.3	12.3	7.7	62.735	30.054	450050000	309430000	140630000	1.09401	-0.297451	0	NaN	Q9Y625	Q9Y625	Glypican-6;Secreted glypican-6	GPC6
-0.541702	-0.242635	-0.114613	NaN	NaN	NaN			7	7	7	66.3	66.3	66.3	10.275	20.528	499510000	325180000	174330000	0.849373	-0.29965	0	NaN	P61513;C9J4Z3;Q6P4E4;E9PEL3;G5E9R3;M0R0A1;M0R2L6;A6NKH3	P61513;C9J4Z3;Q6P4E4;E9PEL3;G5E9R3;M0R0A1;M0R2L6	60S ribosomal protein L37a	RPL37A
-0.305967	NaN	-0.314338	NaN	NaN	NaN			4	4	4	15.8	15.8	15.8	54.766	39.225	128480000	98557000	29918000	2.06597	-0.310152	0	NaN	E7EVX8;Q8WWY3;Q8WWY3-4;E7EU94;E7ESX0;E7EN72;Q8WWY3-2;Q8WWY3-3	E7EVX8;Q8WWY3;Q8WWY3-4;E7EU94;E7ESX0;E7EN72;Q8WWY3-2	U4/U6 small nuclear ribonucleoprotein Prp31	PRPF31
NaN	NaN	-0.31642	NaN	NaN	NaN			1	1	1	8.8	8.8	8.8	24.591	13.777	42560000	24867000	17694000	0	-0.31642	0	NaN	Q8TBF4	Q8TBF4	Zinc finger CCHC-type and RNA-binding motif-containing protein 1	ZCRB1
0.0915306	NaN	-0.746543	NaN	NaN	NaN			5	5	5	18.7	18.7	18.7	37.974	12.267	120470000	84887000	35587000	0.238323	-0.327506	0	NaN	Q86UT8;E9PJ16	Q86UT8	Coiled-coil domain-containing protein 84	CCDC84
-0.651949	-0.113739	-0.239719	NaN	NaN	NaN			5	5	5	10.5	10.5	10.5	63.836	24.838	242770000	146950000	95820000	0.756171	-0.335136	0	NaN	Q86UE4;E5RJU9	Q86UE4;E5RJU9	Protein LYRIC	MTDH
-0.515831	0.404794	-0.898592	NaN	NaN	NaN			6	6	6	15.7	15.7	15.7	49.526	15.589	243520000	160920000	82602000	0.322408	-0.336543	0	NaN	A0A087WY71;Q96CW1-2;Q96CW1;E9PFW3;C9JJ47;C9JJD3;H7C4C3;C9JGT8;C9JPV8;C9JTK4	A0A087WY71;Q96CW1-2;Q96CW1;E9PFW3;C9JJ47	AP-2 complex subunit mu	AP2M1
NaN	NaN	-0.342451	NaN	NaN	NaN			1	1	1	55.6	55.6	55.6	2.7011	2.5403	5739700	4096900	1642800	0	-0.342451	0	NaN	I3L2E0;Q96E14	I3L2E0;Q96E14	RecQ-mediated genome instability protein 2	RMI2
NaN	-0.110682	-0.574498	NaN	NaN	NaN			1	1	1	4.3	4.3	4.3	36.439	1.8421	128840000	75846000	52996000	0.421551	-0.34259	0	NaN	Q9UJA5-4;Q9UJA5-3;Q9UJA5-2;Q9UJA5	Q9UJA5-4;Q9UJA5-3;Q9UJA5-2;Q9UJA5	tRNA (adenine(58)-N(1))-methyltransferase non-catalytic subunit TRM6	TRMT6
-0.55313	NaN	-0.135206	NaN	NaN	NaN			3	3	3	4.4	4.4	4.4	109.73	33.179	147750000	71554000	76194000	0.459197	-0.344168	0	NaN	Q6P2E9-2;Q6P2E9	Q6P2E9-2;Q6P2E9	Enhancer of mRNA-decapping protein 4	EDC4
-0.217826	-0.301444	-0.538409	NaN	NaN	NaN			4	4	4	31.5	31.5	31.5	16.496	9.1098	298720000	205600000	93120000	1.17515	-0.35256	0	NaN	F5GXV8;F5GY08;J3KPD3;Q9Y580;F5H606;I3L521;F5H674;G3V1T9	F5GXV8;F5GY08;J3KPD3;Q9Y580;F5H606;I3L521;F5H674	RNA-binding protein 7	RBM7
NaN	-0.353192	NaN	NaN	NaN	NaN			2	2	2	7.9	7.9	7.9	52.29	19.785	41468000	27285000	14182000	0	-0.353192	0	NaN	Q5T7U1;Q9Y5Q8-2;Q9Y5Q8;Q9Y5Q8-3;Q5T7U0;Q5T7U4	Q5T7U1;Q9Y5Q8-2;Q9Y5Q8;Q9Y5Q8-3;Q5T7U0;Q5T7U4	General transcription factor 3C polypeptide 5	GTF3C5
-0.279739	-0.370508	-0.44658	NaN	NaN	NaN			6	6	6	29.4	29.4	29.4	27.924	23.902	360720000	230680000	130050000	1.77064	-0.365609	0	NaN	Q9NRX1;F8WBJ6	Q9NRX1;F8WBJ6	RNA-binding protein PNO1	PNO1
NaN	NaN	-0.371777	NaN	NaN	NaN			4	4	4	6.9	6.9	6.9	73.457	6.4918	71613000	44989000	26623000	0	-0.371777	0	NaN	P46063;F5H2L2;F8WA66;F8WD97	P46063	ATP-dependent DNA helicase Q1	RECQL
-0.416693	-0.422907	-0.280247	NaN	NaN	NaN			18	18	18	29.2	29.2	29.2	97.207	76.954	1773600000	1191300000	582300000	1.81818	-0.373282	0	NaN	Q9UKV8;Q9UKV8-2;Q5TA58;Q9H9G7-2;Q9UL18;Q9H9G7;Q9HCK5	Q9UKV8;Q9UKV8-2	Protein argonaute-2	AGO2
-0.321387	NaN	-0.435573	NaN	NaN	NaN			1	1	1	10.2	10.2	10.2	10.905	2.6721	154960000	105750000	49205000	1.02084	-0.37848	0	NaN	E9PR30;P62861	E9PR30;P62861	40S ribosomal protein S30	FAU
-0.881029	0.0457225	-0.338013	NaN	NaN	NaN			7	7	7	26.3	26.3	26.3	37.504	44.655	865760000	569490000	296270000	0.548262	-0.391107	0	NaN	X6R3G6;F5GZN3;Q08431-2;Q08431-3;Q08431;H0YKS8;A0A087WUV5	X6R3G6;F5GZN3;Q08431-2;Q08431-3;Q08431;H0YKS8	Lactadherin;Lactadherin short form;Medin	MFGE8
NaN	-0.440812	-0.342049	NaN	NaN	NaN			25	2	2	84.5	15	15	23.79	86.541	487130000	330340000	156800000	1.0975	-0.39143	0	NaN	H0YDN1	H0YDN1		PLEC
NaN	NaN	-0.399921	NaN	NaN	NaN			3	3	3	8.6	8.6	8.6	73.747	18.161	107030000	73032000	33999000	0	-0.399921	0	NaN	Q9BW19	Q9BW19	Kinesin-like protein KIFC1	KIFC1
-0.407823	NaN	NaN	NaN	NaN	NaN			3	3	3	32.2	32.2	32.2	12.476	10.326	338100000	172450000	165650000	0	-0.407823	0	NaN	P14174	P14174	Macrophage migration inhibitory factor	MIF
-0.387242	NaN	-0.434169	NaN	NaN	NaN			3	3	3	15.8	15.8	15.8	29.835	5.7118	70990000	45647000	25344000	1.43973	-0.410705	0	NaN	C9IYT0;O60832-2;O60832;H7C0M1;H7BZF2;H7C2Q9	C9IYT0;O60832-2;O60832;H7C0M1	H/ACA ribonucleoprotein complex subunit 4	DKC1
NaN	-0.423971	NaN	NaN	NaN	NaN			3	3	3	1.6	1.6	1.6	263.25	8.0712	21299000	15082000	6216600	0	-0.423971	0	NaN	H0YM23;O75179-6;O75179-7;O75179-2;O75179;H0YLQ3;O75179-3;D6RHC4;E9PDP5;Q8IWZ3-5;Q8IWZ3-3;Q8IWZ3-2;O75179-5;O75179-4;Q8IWZ3;Q8IWZ3-4;Q8IWZ3-6	H0YM23;O75179-6;O75179-7;O75179-2;O75179;H0YLQ3;O75179-3	Ankyrin repeat domain-containing protein 17	ANKRD17
-0.548607	-0.302226	NaN	NaN	NaN	NaN			11	2	2	38.6	10.4	10.4	32.071	21.11	433260000	294470000	138790000	0.746077	-0.425417	0	NaN	H7BY36	H7BY36		EWSR1
-0.26741	-0.528448	-0.496	NaN	NaN	NaN			4	4	4	24.4	24.4	24.4	18.001	8.601	101340000	70582000	30762000	1.46202	-0.430619	0	NaN	P52298;C9JQX9;B3KSB0;P52298-3;P52298-2;F8WE41;A6PVI3	P52298;C9JQX9;B3KSB0;P52298-3;P52298-2	Nuclear cap-binding protein subunit 2	NCBP2
-0.0904803	-0.453676	-0.758941	NaN	NaN	NaN			3	3	3	7.6	7.6	7.6	39.552	6.2334	196200000	134110000	62086000	0.813758	-0.434366	0	NaN	P36957-2;P36957;Q86SW4	P36957-2;P36957;Q86SW4	Dihydrolipoyllysine-residue succinyltransferase component of 2-oxoglutarate dehydrogenase complex, mitochondrial	DLST
-0.348445	-0.515728	-0.44719	NaN	NaN	NaN			2	2	2	14.5	14.5	14.5	17.752	8.534	552750000	370980000	181770000	1.91674	-0.437121	0	NaN	P47914	P47914	60S ribosomal protein L29	RPL29
-0.314733	-0.585843	NaN	NaN	NaN	NaN			3	3	3	15.3	15.3	15.3	19.167	5.4	492510000	336540000	155970000	0.730125	-0.450288	0	NaN	P07305-2;P07305	P07305-2;P07305	Histone H1.0;Histone H1.0, N-terminally processed	H1F0
-0.426645	-0.348243	-0.586709	NaN	NaN	NaN			6	6	6	10.4	10.4	10.4	80.214	16.015	390600000	273530000	117070000	1.63677	-0.453866	0	NaN	P08582;P08582-2;C9JVN1	P08582	Melanotransferrin	MFI2
-0.324582	-0.421013	-0.639198	NaN	NaN	NaN			18	18	17	7.6	7.6	7.3	308.77	61.19	1611100000	1092400000	518750000	1.41653	-0.461597	0	NaN	E7EPN9;Q9Y520-6;Q9Y520-4;Q9Y520-5;Q9Y520;Q9Y520-7;Q9Y520-3;Q9Y520-2;H7C5N8;A0A0A0MS30	E7EPN9;Q9Y520-6;Q9Y520-4;Q9Y520-5;Q9Y520;Q9Y520-7;Q9Y520-3;Q9Y520-2	Protein PRRC2C	PRRC2C
NaN	NaN	-0.483218	NaN	NaN	NaN			1	1	1	17.4	17.4	17.4	10.135	2.63	18828000	12991000	5836600	0	-0.483218	0	NaN	Q9BWJ5	Q9BWJ5	Splicing factor 3B subunit 5	SF3B5
NaN	-0.268591	-0.69867	NaN	NaN	NaN			7	6	6	32.3	30.1	30.1	40.569	60.388	417750000	299510000	118240000	0.574544	-0.48363	0	NaN	P28289;P28289-2	P28289;P28289-2	Tropomodulin-1	TMOD1
NaN	NaN	-0.484187	NaN	NaN	NaN			2	2	2	18.6	18.6	18.6	11.57	2.8674	32005000	20450000	11556000	0	-0.484187	0	NaN	D6RHW1;D6RIY1;D6RGK3;D6RIV9;D6RIE8;Q9HBM6;Q16594	D6RHW1;D6RIY1;D6RGK3;D6RIV9;D6RIE8;Q9HBM6;Q16594	Transcription initiation factor TFIID subunit 9B;Transcription initiation factor TFIID subunit 9	TAF9;TAF9B
0.191563	NaN	-1.1644	NaN	NaN	NaN			3	3	3	8	8	8	63.132	8.1521	64683000	48157000	16525000	0.219104	-0.486418	0	NaN	Q9NY61;A0A087WTH8;A0A087WWS8	Q9NY61	Protein AATF	AATF
-0.486954	NaN	NaN	NaN	NaN	NaN			3	1	1	7.5	2.6	2.6	61.515	5.7602	26622000	18957000	7665300	0	-0.486954	0	NaN	R9WNI0;A8MQB8;G3V0J0;Q06787-8;Q06787-6;Q06787-2;Q06787-4;Q06787-5;Q06787-9;Q06787-7;Q06787-3;Q06787;A0A087WWR6;Q8IXW7;A0A087WXI3;G8JLE9	R9WNI0;A8MQB8;G3V0J0;Q06787-8;Q06787-6;Q06787-2;Q06787-4;Q06787-5;Q06787-9;Q06787-7;Q06787-3;Q06787;A0A087WWR6;Q8IXW7;A0A087WXI3;G8JLE9	Fragile X mental retardation protein 1	FMR1
NaN	NaN	-0.493682	NaN	NaN	NaN			3	3	3	15.1	15.1	15.1	31.932	9.2862	65070000	39540000	25530000	0	-0.493682	0	NaN	Q9HAN9	Q9HAN9	Nicotinamide/nicotinic acid mononucleotide adenylyltransferase 1	NMNAT1
-0.532867	-0.592897	-0.365983	NaN	NaN	NaN			5	5	5	7.3	7.3	7.3	105.58	14.145	242220000	166080000	76141000	1.74157	-0.497249	0	NaN	Q15020-4;Q15020;F8VV04;H0YHU8;Q15020-2	Q15020-4;Q15020;F8VV04	Squamous cell carcinoma antigen recognized by T-cells 3	SART3
NaN	-0.497914	NaN	NaN	NaN	NaN			4	3	3	46.9	38.9	38.9	12.951	8.9428	95902000	63573000	32329000	0	-0.497914	0	NaN	Q13595-2;Q13595-4;Q13595-3;Q13595	Q13595-2;Q13595-4;Q13595-3;Q13595	Transformer-2 protein homolog alpha	TRA2A
NaN	NaN	-0.499259	NaN	NaN	NaN			2	2	2	32.4	32.4	32.4	11.845	9.0323	23195000	18015000	5180300	0	-0.499259	0	NaN	P62310	P62310	U6 snRNA-associated Sm-like protein LSm3	LSM3
-0.578564	-0.412347	-0.507993	NaN	NaN	NaN			11	11	11	33.4	33.4	33.4	47.064	35.885	765290000	486550000	278730000	2.03786	-0.499635	0	NaN	Q14254;J3QLD9;E7EMK3;K7EKW9	Q14254;J3QLD9;E7EMK3	Flotillin-2	FLOT2
NaN	NaN	-0.502321	NaN	NaN	NaN			19	2	2	42.1	4.1	4.1	42.141	2.8244	74884000	52179000	22706000	0	-0.502321	0	NaN	Q96E39	Q96E39	RNA binding motif protein, X-linked-like-1	RBMXL1
NaN	-0.520563	NaN	NaN	NaN	NaN			4	3	3	3.6	3.1	3.1	165.53	6.6627	43496000	28813000	14684000	0	-0.520563	0	NaN	Q5JSZ5-5;Q5JSZ5;H0Y412	Q5JSZ5-5;Q5JSZ5;H0Y412	Protein PRRC2B	PRRC2B
-0.186295	-0.91395	-0.524687	NaN	NaN	NaN			3	2	2	10	8.1	8.1	40.147	19.115	994470000	694260000	300210000	0.908771	-0.541644	0	NaN	E7ETU5;F6Y5H0;P29558-2;P29558;E7EPF2;C9J9B2;C9JIJ9;Q6XE24-3;Q6XE24-4;Q6XE24-5;Q6XE24-2;Q6XE24	E7ETU5;F6Y5H0;P29558-2;P29558;E7EPF2;C9J9B2;C9JIJ9;Q6XE24-3;Q6XE24-4;Q6XE24-5;Q6XE24-2;Q6XE24	RNA-binding motif, single-stranded-interacting protein 1;RNA-binding motif, single-stranded-interacting protein 3	RBMS1;RBMS3
NaN	NaN	-0.559175	NaN	NaN	NaN			2	2	2	17.5	17.5	17.5	11.341	3.7319	19625000	12944000	6680400	0	-0.559175	0	NaN	Q5JUP3;Q9BQI0-4;Q9BQI0-3;Q9BQI0;Q9BQI0-2;H7C605	Q5JUP3;Q9BQI0-4;Q9BQI0-3;Q9BQI0;Q9BQI0-2;H7C605	Allograft inflammatory factor 1-like	AIF1L
-0.767904	-0.619514	-0.299915	NaN	NaN	NaN			11	11	11	32.4	32.4	32.4	51.109	61.108	1625800000	1160900000	464910000	1.25716	-0.562445	0	NaN	P41091;Q2VIR3;F8W810;Q2VIR3-2;H7BZU1	P41091;Q2VIR3	Eukaryotic translation initiation factor 2 subunit 3;Putative eukaryotic translation initiation factor 2 subunit 3-like protein	EIF2S3;EIF2S3L
-0.563326	-0.661387	-0.462734	NaN	NaN	NaN			14	9	3	49.5	38.4	9.1	40.089	115.62	8995000000	6258000000	2737000000	1.98989	-0.562483	0	NaN	P16989;P16989-3	P16989;P16989-3	Y-box-binding protein 3	YBX3
-0.62589	-0.483521	-0.591745	NaN	NaN	NaN	+		20	20	20	26.4	26.4	26.4	109.93	97.722	1973400000	1430500000	542870000	2.24578	-0.567052	0	NaN	D6RD46;Q9UPQ0-10;Q9UPQ0-2;Q9UPQ0;Q9UPQ0-4;H0Y8P3;Q9UPQ0-8;Q9UPQ0-6;E7EPK0;E9PDJ9;G5EA03;Q9UPQ0-9;Q9UPQ0-5;Q9UPQ0-3;D6RJ93;Q6NVB9;D6R8Y0;Q9UPQ0-7	D6RD46;Q9UPQ0-10;Q9UPQ0-2;Q9UPQ0;Q9UPQ0-4;H0Y8P3;Q9UPQ0-8;Q9UPQ0-6;E7EPK0;E9PDJ9;G5EA03;Q9UPQ0-9;Q9UPQ0-5;Q9UPQ0-3	LIM and calponin homology domains-containing protein 1	LIMCH1
-0.753799	-0.485358	-0.524645	NaN	NaN	NaN			7	7	7	17.5	17.5	17.5	57.39	24.131	913570000	641350000	272230000	1.70613	-0.587934	0	NaN	P19525-2;P19525;F8WBH4;C9JZT2	P19525-2;P19525	Interferon-induced, double-stranded RNA-activated protein kinase	EIF2AK2
-0.297183	NaN	-0.88188	NaN	NaN	NaN			3	2	2	5.8	4.9	4.9	116.5	6.6021	642990000	557980000	85009000	0.533021	-0.589531	0	NaN	A0A0A0MS24;O60237;H7C4R6;O60237-2;O60237-5	A0A0A0MS24;O60237	Protein phosphatase 1 regulatory subunit 12B	PPP1R12B
-0.7071	-0.777591	-0.285161	NaN	NaN	NaN			27	2	2	55.3	3.9	3.9	37.029	10.819	4362200000	2837100000	1525200000	1.20972	-0.589951	0	NaN	P51991-2	P51991-2	Heterogeneous nuclear ribonucleoprotein A3	HNRNPA3
-0.633345	-0.664037	-0.529677	NaN	NaN	NaN	+		7	7	7	20.8	20.8	20.8	46.836	25.057	549760000	377940000	171820000	2.35406	-0.609019	0	NaN	P05455;E7ERC4;E9PGX9;E9PFL9	P05455;E7ERC4	Lupus La protein	SSB
-0.660954	-0.817587	-0.357548	NaN	NaN	NaN			5	5	4	15.4	15.4	13.4	37.186	29.28	1301800000	828570000	473270000	1.34302	-0.61203	0	NaN	F8W1T6;Q15434;F8VQS9;F8VZR4	F8W1T6;Q15434;F8VQS9	RNA-binding motif, single-stranded-interacting protein 2	RBMS2
NaN	NaN	-0.620179	NaN	NaN	NaN			27	2	2	48.9	3.5	3.5	71.214	27.405	198610000	143120000	55487000	0	-0.620179	0	NaN	O43390-2;O43390-4	O43390-2;O43390-4	Heterogeneous nuclear ribonucleoprotein R	HNRNPR
NaN	NaN	-0.628586	NaN	NaN	NaN			3	3	3	13	13	13	34.812	10.763	248130000	180370000	67754000	0	-0.628586	0	NaN	B4DHE8;Q96DH6-2;Q96DH6;J3QKT5;J3KTC1;B4DM51;Q96DH6-3	B4DHE8;Q96DH6-2;Q96DH6;J3QKT5;J3KTC1	RNA-binding protein Musashi homolog 2	MSI2
-0.555481	NaN	-0.726615	NaN	NaN	NaN			6	6	6	3.3	3.3	3.3	289.57	11.734	96200000	74386000	21814000	1.07326	-0.641048	0	NaN	Q99973-2;Q99973;G3V470;G3V2A4;G3V5X7	Q99973-2;Q99973;G3V470;G3V2A4;G3V5X7	Telomerase protein component 1	TEP1
-0.533326	NaN	-0.758233	NaN	NaN	NaN			2	2	2	4.1	4.1	4.1	55.142	2.9799	170720000	118000000	52728000	0.959564	-0.645779	0	NaN	G5EA30;Q92879-5;Q92879-2;Q92879-3;Q92879-6;Q92879;Q92879-4;E9PKA1;F5H4Y5;E9PQK4;E9PSH0;F5H0D8;E9PKU1	G5EA30;Q92879-5;Q92879-2;Q92879-3;Q92879-6;Q92879;Q92879-4;E9PKA1;F5H4Y5;E9PQK4;E9PSH0;F5H0D8;E9PKU1	CUGBP Elav-like family member 1	CELF1
-0.583095	-0.561792	-0.813068	NaN	NaN	NaN			6	6	6	15.1	15.1	15.1	54.178	28.138	357120000	252200000	104920000	1.82814	-0.652652	0	NaN	Q9NUQ6-2;Q9NUQ6;A0A0A0MSG5;B8ZZZ7;Q9NUQ6-4;Q9NUQ6-3;F8W6C2;F8VZ02;C9JGM8;Q4ZFW0;F8WAV0;C9IZC3;C9J8M7;F2Z2S1;C9JKE4;F8VT91;C9JW67	Q9NUQ6-2;Q9NUQ6;A0A0A0MSG5;B8ZZZ7;Q9NUQ6-4;Q9NUQ6-3;F8W6C2	SPATS2-like protein	SPATS2L
NaN	-0.534746	-0.791707	NaN	NaN	NaN			13	2	2	57.4	7.9	7.9	31.947	36.312	230760000	166500000	64253000	0.914291	-0.663227	0	NaN	P16989-2;A0A0D9SEI8	P16989-2	Y-box-binding protein 3	YBX3
-0.436686	-0.838125	-0.716671	NaN	NaN	NaN			8	8	8	33.2	33.2	33.2	34.404	41.373	523270000	371200000	152060000	1.51434	-0.663827	0	NaN	O75569;O75569-3;O75569-2;G5E9Q4;F8WEG8;C9JMM3	O75569;O75569-3;O75569-2;G5E9Q4;F8WEG8;C9JMM3	Interferon-inducible double-stranded RNA-dependent protein kinase activator A	PRKRA
-0.675443	NaN	NaN	NaN	NaN	NaN			1	1	1	16.9	16.9	16.9	7.032	7.4641	26763000	20805000	5958100	0	-0.675443	0	NaN	I3L172;Q9BUT9-2;Q9BUT9	I3L172;Q9BUT9-2;Q9BUT9	Protein FAM195A	FAM195A
-0.678395	NaN	NaN	NaN	NaN	NaN			2	2	2	3	3	3	121.89	6.7838	73130000	44532000	28598000	0	-0.678395	0	NaN	P54289-4;P54289-5;P54289-3;P54289-2;P54289	P54289-4;P54289-5;P54289-3;P54289-2;P54289	Voltage-dependent calcium channel subunit alpha-2/delta-1;Voltage-dependent calcium channel subunit alpha-2-1;Voltage-dependent calcium channel subunit delta-1	CACNA2D1
NaN	NaN	-0.700896	NaN	NaN	NaN			3	3	3	8.8	8.8	8.8	25.733	2.5799	66660000	55883000	10777000	0	-0.700896	0	NaN	V9GZ56;Q9Y4Z0;M0QXB0;U3KQS7;U3KQK1	V9GZ56;Q9Y4Z0;M0QXB0;U3KQS7;U3KQK1	U6 snRNA-associated Sm-like protein LSm4	LSM4
NaN	-0.864465	-0.539184	NaN	NaN	NaN			2	2	2	4.8	4.8	4.8	44.402	5.3689	118480000	82686000	35793000	0.838719	-0.701825	0	NaN	Q9H814	Q9H814	Phosphorylated adapter RNA export protein	PHAX
NaN	-0.617211	-0.804703	NaN	NaN	NaN			28	1	1	67	2.7	2.7	48.562	2.4726	704280000	509050000	195230000	1.07851	-0.710957	0	NaN	P61978-3;Q5T6W2	P61978-3;Q5T6W2	Heterogeneous nuclear ribonucleoprotein K	HNRNPK
-0.68309	-0.819139	-0.652969	NaN	NaN	NaN	+		8	8	8	35.4	35.4	35.4	29.909	74.06	1183800000	685980000	497810000	2.29892	-0.718399	0	NaN	Q8WXX5	Q8WXX5	DnaJ homolog subfamily C member 9	DNAJC9
NaN	NaN	-0.724921	NaN	NaN	NaN			4	4	4	23.2	23.2	23.2	26.11	7.039	116770000	77696000	39077000	0	-0.724921	0	NaN	C9IZE1;F8WAE5;Q9BY44-3;Q9BY44;Q9BY44-4;H7C5Q3	C9IZE1;F8WAE5;Q9BY44-3;Q9BY44;Q9BY44-4;H7C5Q3	Eukaryotic translation initiation factor 2A;Eukaryotic translation initiation factor 2A, N-terminally processed	EIF2A
NaN	NaN	-0.729603	NaN	NaN	NaN			2	2	2	17.1	17.1	17.1	14.234	3.8705	14493000	9599500	4893500	0	-0.729603	0	NaN	A0A0B4J220;E9PLD3;E9PRG8	A0A0B4J220;E9PLD3;E9PRG8	Uncharacterized protein C11orf98	C11orf98
-0.624177	-0.668272	-0.936911	NaN	NaN	NaN			10	9	9	7.7	7.3	7.3	228.86	51.548	750820000	553900000	196920000	1.77317	-0.74312	0	NaN	P48634;P48634-2;P48634-3;P48634-4	P48634;P48634-2;P48634-3;P48634-4	Protein PRRC2A	PRRC2A
NaN	NaN	-0.745866	NaN	NaN	NaN			3	3	3	16.6	16.6	16.6	20.019	5.4616	238990000	76262000	162730000	0	-0.745866	0	NaN	P02792;A0A087X1B9	P02792;A0A087X1B9	Ferritin light chain;Ferritin	FTL
-0.780612	-0.691057	-0.81203	NaN	NaN	NaN	+		12	12	12	31.9	31.9	31.9	43.618	49.884	1125700000	821330000	304380000	2.6461	-0.761233	0	NaN	Q9NUD5;Q9NUD5-2	Q9NUD5;Q9NUD5-2	Zinc finger CCHC domain-containing protein 3	ZCCHC3
-0.728885	-0.721111	-0.982506	NaN	NaN	NaN			9	9	9	10.2	10.2	10.2	159.69	81.546	597670000	427610000	170060000	1.95746	-0.810834	0	NaN	Q6YHK3-4;Q6YHK3;Q6YHK3-2;Q6YHK3-3	Q6YHK3-4;Q6YHK3;Q6YHK3-2;Q6YHK3-3	CD109 antigen	CD109
NaN	NaN	-0.842879	NaN	NaN	NaN			9	2	2	35.9	11.7	11.7	17.256	2.012	45443000	31716000	13727000	0	-0.842879	0	NaN	Q9UNX3;E5RIT6;E5RHH1;J3KS10	Q9UNX3;E5RIT6	60S ribosomal protein L26-like 1	RPL26L1
-0.782695	NaN	-0.925659	NaN	NaN	NaN			7	5	5	20.3	15.7	15.7	42.632	9.2201	289810000	156820000	133000000	1.27448	-0.854177	0	NaN	A0A0A0MRX1;Q12926-2;Q12926;B1APY9;B1APY8;A0A0R4J2E6;P26378-4;P26378-2;P26378-5;P26378;P26378-3;B1AM48;Q14576-2;Q14576;C9JB16	A0A0A0MRX1;Q12926-2;Q12926;B1APY9;B1APY8;A0A0R4J2E6;P26378-4;P26378-2;P26378-5;P26378;P26378-3;B1AM48	ELAV-like protein;ELAV-like protein 2;ELAV-like protein 4	ELAVL2;ELAVL4
NaN	-1.13362	-0.650431	NaN	NaN	NaN			4	2	2	11.8	6.4	6.4	45.02	6.5671	108490000	87261000	21226000	0.773704	-0.892027	0	NaN	Q8IUX4;Q9HC16-3;Q8IUX4-2;Q8IUX4-3;Q9HC16	Q8IUX4	DNA dC->dU-editing enzyme APOBEC-3F	APOBEC3F
-0.566421	-1.00228	-1.13765	NaN	NaN	NaN			3	3	3	3.3	3.3	3.3	182.05	3.9403	806860000	104050000	702810000	1.46078	-0.902117	0	NaN	Q8NDV7-2;Q8NDV7-6;Q8NDV7-5;Q8NDV7;H3BRT3;H7C269;Q9HCJ0;Q9HCJ0-2	Q8NDV7-2;Q8NDV7-6;Q8NDV7-5;Q8NDV7;H3BRT3;H7C269	Trinucleotide repeat-containing gene 6A protein	TNRC6A
-1.05086	-0.607946	-1.04928	NaN	NaN	NaN			5	5	5	22.5	22.5	22.5	34.984	83.949	1583700000	627100000	956600000	1.59119	-0.902695	0	NaN	Q9P121-3;Q9P121-2;Q9P121;Q9P121-4;F6WFR7;F8W8Y1;H7BZ62;F8VTR5	Q9P121-3;Q9P121-2;Q9P121;Q9P121-4;F6WFR7;F8W8Y1	Neurotrimin	NTM
-0.953411	NaN	NaN	NaN	NaN	NaN			4	4	4	16.2	16.2	16.2	30.375	61.094	347850000	272320000	75534000	0	-0.953411	0	NaN	P16152;E9PQ63;A8MTM1;P16152-2	P16152	Carbonyl reductase [NADPH] 1	CBR1
NaN	NaN	-0.978009	NaN	NaN	NaN			2	2	2	23.8	23.8	23.8	9.1275	2.2692	18661000	13757000	4903500	0	-0.978009	0	NaN	P62312	P62312	U6 snRNA-associated Sm-like protein LSm6	LSM6
-1.07875	-0.94764	-1.03218	NaN	NaN	NaN	+		9	7	7	26.6	22.9	22.9	43.278	43.845	1023000000	730160000	292790000	2.84967	-1.01952	0	NaN	A0A0A0MTC4;E9PH62;A0A0A0MTC5;Q9NUL3-6;Q9NUL3-2;Q9NUL3;E5RJN7;A0A0A0MTD1;F8VPI7;E7EPX0;A0A0A0MTC6;E7EVJ4;Q9NUL3-8;Q9NUL3-3;Q9NUL3-7;E7EVI1;Q9NUL3-4;G5EA18;E5RJ67;E5RFK1;H0YBY0	A0A0A0MTC4;E9PH62;A0A0A0MTC5;Q9NUL3-6;Q9NUL3-2;Q9NUL3;E5RJN7;A0A0A0MTD1;F8VPI7;E7EPX0;A0A0A0MTC6;E7EVJ4;Q9NUL3-8;Q9NUL3-3;Q9NUL3-7;E7EVI1;Q9NUL3-4;G5EA18	Double-stranded RNA-binding protein Staufen homolog 2	STAU2
-0.672198	NaN	-1.41677	NaN	NaN	NaN			3	3	3	5.5	5.5	5.5	70.592	8.6094	180180000	132610000	47565000	0.661596	-1.04448	0	NaN	Q53F19;K7ELP6;Q53F19-2	Q53F19	Uncharacterized protein C17orf85	C17orf85
-1.38888	-0.41835	-1.38146	NaN	NaN	NaN			12	12	12	5.5	5.5	5.5	333.2	41.03	715930000	452810000	263130000	1.09188	-1.0629	0	NaN	D6RGG3;Q99715-4;Q99715;A0A087X0A8;Q99715-2;H0Y4P7;H0Y5N9;H0Y991	D6RGG3;Q99715-4;Q99715;A0A087X0A8;Q99715-2	Collagen alpha-1(XII) chain	COL12A1
-2.25539	NaN	0.0479571	NaN	NaN	NaN			6	6	6	47.5	47.5	47.5	19.208	91.508	157520000	129730000	27794000	0.28943	-1.10372	0	NaN	O43447;O43447-2;C9JQD4;H0YEL5	O43447;O43447-2;C9JQD4;H0YEL5	Peptidyl-prolyl cis-trans isomerase H;Peptidyl-prolyl cis-trans isomerase	PPIH
NaN	NaN	-1.13157	NaN	NaN	NaN			3	3	3	12.1	12.1	12.1	36.313	27.649	144410000	105790000	38619000	0	-1.13157	0	NaN	Q07352;G3V2D5;G3V515;G3V2P5;A0A087WUU9;P47974	Q07352	Zinc finger protein 36, C3H1 type-like 1	ZFP36L1
NaN	-1.24246	-1.22108	NaN	NaN	NaN	+		4	4	4	33.1	33.1	33.1	17.218	11.241	149830000	115540000	34297000	2.25769	-1.23177	0	NaN	Q9H4G4;Q5VZR0;A0A088AWP7;A0A087WUM5	Q9H4G4;Q5VZR0	Golgi-associated plant pathogenesis-related protein 1	GLIPR2
-1.27953	NaN	NaN	NaN	NaN	NaN			2	2	2	15.6	15.6	15.6	15.397	8.8952	19580000	16897000	2683300	0	-1.27953	0	NaN	H0Y4J6;Q5T9B7;P00568	H0Y4J6;Q5T9B7;P00568	Adenylate kinase isoenzyme 1	AK1
NaN	NaN	-1.32891	NaN	NaN	NaN			3	3	3	24.6	24.6	24.6	15.156	6.5289	199050000	157480000	41572000	0	-1.32891	0	NaN	J3QL05;J3KP15;Q01130-2;Q01130;Q9BRL6-2;Q9BRL6	J3QL05;J3KP15;Q01130-2;Q01130;Q9BRL6-2;Q9BRL6	Serine/arginine-rich splicing factor 2;Serine/arginine-rich splicing factor 8	SRSF2;SRSF8
-3.75378	NaN	0.856707	NaN	NaN	NaN			4	4	3	35.9	35.9	30.3	22.367	133.66	524430000	493500000	30930000	0.191893	-1.44854	0	NaN	Q9NR31;Q9NR31-2;Q5SQT8;X1WI22	Q9NR31;Q9NR31-2;Q5SQT8	GTP-binding protein SAR1a	SAR1A
NaN	NaN	-1.66818	NaN	NaN	NaN			3	3	3	8.4	8.4	8.4	62.595	17.184	58118000	39226000	18892000	0	-1.66818	0	NaN	Q96A19	Q96A19	Coiled-coil domain-containing protein 102A	CCDC102A
NaN	NaN	-1.86997	NaN	NaN	NaN			3	3	3	4.8	4.8	4.8	124.45	7.1251	140990000	123310000	17674000	0	-1.86997	0	NaN	Q9UGM3-9;Q9UGM3-4;Q9UGM3-8;Q9UGM3-2;Q9UGM3-5;Q9UGM3-3;Q9UGM3;Q9UGM3-7;Q9UGM3-6	Q9UGM3-9;Q9UGM3-4;Q9UGM3-8;Q9UGM3-2;Q9UGM3-5;Q9UGM3-3;Q9UGM3;Q9UGM3-7;Q9UGM3-6	Deleted in malignant brain tumors 1 protein	DMBT1
-1.91501	NaN	NaN	NaN	NaN	NaN			4	4	4	50.3	50.3	50.3	21.057	320.83	1312700000	1307100000	5600100	0	-1.91501	0	NaN	P30086	P30086	Phosphatidylethanolamine-binding protein 1;Hippocampal cholinergic neurostimulating peptide	PEBP1
-3.25594	NaN	-0.827948	NaN	NaN	NaN			4	4	4	27.6	27.6	27.6	14.557	11.083	39807000	36384000	3423300	0.466641	-2.04195	0	NaN	P07741-2;P07741;H3BQF1;H3BQB1;H3BQZ9;H3BSW3	P07741-2;P07741;H3BQF1;H3BQB1;H3BQZ9	Adenine phosphoribosyltransferase	APRT
NaN	-2.57656	-1.6254	NaN	NaN	NaN			5	5	5	12.1	12.1	12.1	73.881	27.128	246490000	216470000	30021000	0.848576	-2.10098	0	NaN	P08253;P08253-2;P08253-3;H3BV48;H3BR66;H3BS34	P08253;P08253-2;P08253-3	72 kDa type IV collagenase;PEX	MMP2
NaN	-2.1941	NaN	NaN	NaN	NaN			2	2	2	5.2	5.2	5.2	41.531	4.67	705100000	623990000	81111000	0	-2.1941	0	NaN	A0A087WU53;Q9H0U3	A0A087WU53;Q9H0U3	Magnesium transporter protein 1	MAGT1
-2.70162	NaN	-1.9167	NaN	NaN	NaN			3	3	2	24.4	24.4	18.5	12.926	20.249	1617000000	1471500000	145490000	0.969906	-2.30916	0	NaN	A0A0B4J1V0;A0A087WWF0;A0A0G2JN55;A0A087WW89;A0A087WU91;S4R3C0;A0A0C4DH42;A0A0C4DH36;A0A0A0MS11;A0A087WSX4;A0A075B7F1;A0A0J9YY99;A0A0J9YX35;A0A0J9YVT0;A0A0B4J2B7;A0A0B4J1V3;A0A0B4J1X8;A0A075B6Q5;A0A0B4J1Y9;A0A0B4J1V6;A0A0A0MS15;A0A0G2JNK4;P01763;P01767;P01765;P01766;P01771;P01768;P01762;P01772	A0A0B4J1V0		IGHV3-15
NaN	-2.40308	NaN	NaN	NaN	NaN			8	8	8	20.4	20.4	20.4	64.135	51.351	375240000	369290000	5946000	0	-2.40308	0	NaN	Q5T749	Q5T749	Keratinocyte proline-rich protein	KPRP
-2.44191	NaN	NaN	NaN	NaN	NaN			4	4	4	16.5	16.5	16.5	34.412	14.032	69749000	63700000	6049000	0	-2.44191	0	NaN	Q9HA64;I3L3W5;I3L139;I3L2G3;I3L378	Q9HA64;I3L3W5;I3L139;I3L2G3	Ketosamine-3-kinase	FN3KRP
NaN	NaN	-2.61476	NaN	NaN	NaN			4	4	4	16.8	16.8	16.8	34.258	12.448	180630000	165190000	15441000	0	-2.61476	0	NaN	P25311;C9JEV0	P25311;C9JEV0	Zinc-alpha-2-glycoprotein	AZGP1
-2.66658	NaN	NaN	NaN	NaN	NaN			2	2	2	12	12	12	37.765	20.978	52028000	49634000	2393900	0	-2.66658	0	NaN	Q96C23;B8ZZ75;H7C320;H7C1B5	Q96C23;B8ZZ75;H7C320;H7C1B5	Aldose 1-epimerase	GALM
-3.18023	NaN	-2.27935	NaN	NaN	NaN			3	2	1	25.6	23.9	16.2	12.839	2.4849	1321900000	1238800000	83121000	0.982509	-2.72979	0	NaN	A0A0B4J1V1;A0A087X2C0;S4R460;A0A0B4J2B5;A0A0C4DH37;A0A0C4DH32;A0A0B4J1X5;A0A0B4J1U9;A0A0B4J1U8;A0A087WV47;A0A087X079;P01781	A0A0B4J1V1;A0A087X2C0;S4R460;A0A0B4J2B5;A0A0C4DH37;A0A0C4DH32;A0A0B4J1X5;A0A0B4J1U9;A0A0B4J1U8;A0A087WV47;A0A087X079;P01781	Ig heavy chain V-III region GAL	IGHV3-21;IGHM;IGHV3OR16-9;IGHV3-48;IGHV3-20;IGHV3-74;IGHV3-11;IGHV3-7;IGHG1
-2.73389	NaN	NaN	NaN	NaN	NaN			2	2	2	47.4	47.4	47.4	12.774	14.836	82346000	76672000	5674100	0	-2.73389	0	NaN	O75368	O75368	SH3 domain-binding glutamic acid-rich-like protein	SH3BGRL
-2.75701	NaN	NaN	NaN	NaN	NaN			3	3	3	39.3	39.3	39.3	15.054	24.641	709430000	628180000	81252000	0	-2.75701	0	NaN	P07737;K7EJ44;I3L3D5	P07737;K7EJ44	Profilin-1	PFN1
-2.7729	NaN	NaN	NaN	NaN	NaN			2	2	2	30.8	30.8	30.8	19.206	311.88	269460000	262570000	6898100	0	-2.7729	0	NaN	O95881	O95881	Thioredoxin domain-containing protein 12	TXNDC12
-2.99493	NaN	NaN	NaN	NaN	NaN			1	1	1	3.1	3.1	3.1	56.413	35.848	50942000	47791000	3150800	0	-2.99493	0	NaN	B8ZZY2;P52594-2;P52594-3;P52594;P52594-4	B8ZZY2;P52594-2;P52594-3;P52594;P52594-4	Arf-GAP domain and FG repeat-containing protein 1	AGFG1
-3.26382	NaN	NaN	NaN	NaN	NaN			2	2	2	20.3	20.3	20.3	25.5	47.702	138070000	134350000	3714400	0	-3.26382	0	NaN	I3L3Q4;F6TLX2;Q9HC38-3;Q9HC38-2;Q9HC38	I3L3Q4;F6TLX2;Q9HC38-3;Q9HC38-2;Q9HC38	Glyoxalase domain-containing protein 4	GLOD4
-3.29096	NaN	NaN	NaN	NaN	NaN			4	4	4	32	32	32	35.853	64.512	656800000	648910000	7882800	0	-3.29096	0	NaN	P15121;E9PCX2	P15121;E9PCX2	Aldose reductase	AKR1B1
-3.36394	NaN	NaN	NaN	NaN	NaN			2	2	2	62.5	62.5	62.5	7.0271	12.817	184420000	177430000	6989900	0	-3.36394	0	NaN	M0QXH0;Q99757	M0QXH0;Q99757	Thioredoxin, mitochondrial	TXN2
-3.39874	NaN	NaN	NaN	NaN	NaN			2	2	2	26.3	26.3	26.3	12.712	9.3743	21812000	20445000	1367700	0	-3.39874	0	NaN	P30046;H7C342;J3KQ18;B5MC82;P30046-2;A6NHG4	P30046;H7C342;J3KQ18;B5MC82;P30046-2;A6NHG4	D-dopachrome decarboxylase;D-dopachrome decarboxylase-like protein	DDT;DDTL
-3.42889	NaN	NaN	NaN	NaN	NaN			7	4	4	47.8	31.8	31.8	22.178	16.458	26994000	21724000	5270400	0	-3.42889	0	NaN	P20339-2;P20339	P20339-2;P20339	Ras-related protein Rab-5A	RAB5A
-3.49921	NaN	NaN	NaN	NaN	NaN			2	2	2	22.5	22.5	22.5	13.781	41.347	199830000	190950000	8877100	0	-3.49921	0	NaN	B3KYB6;B3KYB7;P48739;P48739-2;P48739-3;A0A0A0MSW4	B3KYB6;B3KYB7;P48739;P48739-2;P48739-3;A0A0A0MSW4	Phosphatidylinositol transfer protein beta isoform	PITPNB
-3.22837	-3.7362	-3.65094	NaN	NaN	NaN	+		7	7	7	49.4	49.4	49.4	19.25	33.418	2227400000	2145100000	82267000	2.70708	-3.5385	0	NaN	P31025;Q5VSP4	P31025	Lipocalin-1	LCN1
-3.82407	NaN	NaN	NaN	NaN	NaN			2	2	2	10.4	10.4	10.4	26.839	61.601	248500000	245570000	2930100	0	-3.82407	0	NaN	D6R956;P09936;D6RE83	D6R956;P09936;D6RE83	Ubiquitin carboxyl-terminal hydrolase;Ubiquitin carboxyl-terminal hydrolase isozyme L1	UCHL1
-3.84535	NaN	NaN	NaN	NaN	NaN			2	2	2	37.8	37.8	37.8	9.8329	22.318	91245000	87456000	3788800	0	-3.84535	0	NaN	K7EN45;Q13526;K7EMU7	K7EN45;Q13526;K7EMU7	Peptidyl-prolyl cis-trans isomerase NIMA-interacting 1	PIN1
-5.13664	NaN	-2.73822	NaN	NaN	NaN			1	1	1	9.4	9.4	9.4	13.508	44.327	113760000000	113760000000	5082700	0.725354	-3.93743	0	NaN	A0A0A0MS14	A0A0A0MS14		IGHV1-45
-4.20001	NaN	NaN	NaN	NaN	NaN			4	4	4	39	39	39	17.861	119.03	90565000	89310000	1255400	0	-4.20001	0	NaN	P68036;P68036-3;P68036-2	P68036;P68036-3;P68036-2	Ubiquitin-conjugating enzyme E2 L3	UBE2L3
-4.466	NaN	NaN	NaN	NaN	NaN			4	4	4	39.7	39.7	39.7	13.802	163.84	794360000	782210000	12150000	0	-4.466	0	NaN	P49773	P49773	Histidine triad nucleotide-binding protein 1	HINT1
-4.60451	NaN	NaN	NaN	NaN	NaN			3	3	3	24	24	24	14.5	40.437	130050000	128790000	1254800	0	-4.60451	0	NaN	B4DM58;P00374-2;P00374	B4DM58;P00374-2;P00374	Dihydrofolate reductase	DHFR
-4.73312	NaN	NaN	NaN	NaN	NaN			5	5	5	24.2	24.2	24.2	41.428	122.42	591080000	583470000	7607600	0	-4.73312	0	NaN	P00558-2;P00558;P07205	P00558-2;P00558	Phosphoglycerate kinase 1	PGK1
NaN	NaN	NaN	4.52212	NaN	NaN			3	3	3	17.7	17.7	17.7	29.519	3.5258	14636000	36731	14599000	0	NaN	0	4.52212	K7EMR7;O75298-3;O75298-2;O75298;Q7RTN0	K7EMR7;O75298-3;O75298-2;O75298	Reticulon;Reticulon-2	RTN2
NaN	NaN	NaN	4.427	NaN	NaN			4	4	4	20.5	20.5	20.5	27.567	29.214	314450000	15499000	298950000	0	NaN	0	4.427	Q9GZP9;I3L1T3;I3L1S8;I3L0R8;I3L3R8;I3L4W7;K7EQE8;I3L1W3;Q96Q80-5;Q96Q80-4;Q96Q80-3;Q96Q80;Q96Q80-2	Q9GZP9;I3L1T3;I3L1S8;I3L0R8	Derlin-2	DERL2
2.41373	2.81482	6.11255	NaN	NaN	4.4194			2	2	2	13.7	13.7	13.7	17.49	18.697	1400000000	329220000	1070800000	1.07501	3.78037	0	4.4194	P30049	P30049	ATP synthase subunit delta, mitochondrial	ATP5D
NaN	2.11177	NaN	NaN	4.35332	NaN			5	5	5	32.3	32.3	32.3	22.456	16.37	315900000	84126000	231780000	0	2.11177	0	4.35332	Q99653;H0YKE7;F5GX29;H0YNG9;H0YLY7	Q99653;H0YKE7;F5GX29;H0YNG9;H0YLY7	Calcineurin B homologous protein 1	CHP1
NaN	2.08974	NaN	4.53531	NaN	3.82467			4	4	4	11.2	11.2	11.2	52.838	64.68	534140000	94650000	439490000	0	2.08974	1.26772	4.17999	Q15043-2;Q15043-3;Q15043;E5RIP4;E5RFZ8;E5RGA7;E5RJ40;E5RJG5;E5RFT1	Q15043-2;Q15043-3;Q15043;E5RIP4;E5RFZ8;E5RGA7;E5RJ40;E5RJG5	Zinc transporter ZIP14	SLC39A14
2.01214	4.06117	2.72618	3.97379	NaN	NaN			6	6	6	9.3	9.3	9.3	67.887	9.3337	671230000	146980000	524260000	1.40397	2.93316	0	3.97379	Q9HD45;Q5TB53	Q9HD45;Q5TB53	Transmembrane 9 superfamily member 3	TM9SF3
2.34474	2.50203	2.59972	NaN	NaN	3.87135	+		11	11	10	46.7	46.7	40.8	35.503	67.689	3307500000	933450000	2374000000	3.04858	2.48216	0	3.87135	A0A0A0MS41;Q9BWM7;S4R3N9	A0A0A0MS41;Q9BWM7;S4R3N9	Sideroflexin;Sideroflexin-3	SFXN3
NaN	NaN	NaN	NaN	4.40422	3.18425			1	1	1	14.6	14.6	14.6	15.771	3.5056	18725000	1008000	17717000	0	NaN	0.993624	3.79424	A6NLH6;Q9P003	A6NLH6;Q9P003	Protein cornichon homolog 4	CNIH4
3.11936	2.85625	3.19342	NaN	3.37851	4.0571	+		5	5	2	63.7	63.7	18.7	9.8402	28.764	390480000	60642000	329840000	2.95133	3.05634	1.23703	3.71781	C9J0J7;G5E9Q6;P35080-2;C9JQ45;C9J2N0	C9J0J7;G5E9Q6;P35080-2;C9JQ45	Profilin;Profilin-2	PFN2
NaN	NaN	NaN	NaN	3.37962	NaN			3	3	3	4	4	4	100.75	3.1239	7876000	718830	7157200	0	NaN	0	3.37962	Q96PU5-3;Q96PU5-2;Q96PU5-6;Q96PU5-5;Q96PU5-7;Q96PU5;K7EKL1;K7ERN1;Q96PU5-9;Q96PU5-4;P46934-4;H0Y8H4;H0Y8X6;P46934-3;P46934-2;P46934	Q96PU5-3;Q96PU5-2;Q96PU5-6;Q96PU5-5;Q96PU5-7;Q96PU5;K7EKL1;K7ERN1;Q96PU5-9;Q96PU5-4;P46934-4	E3 ubiquitin-protein ligase NEDD4-like;E3 ubiquitin-protein ligase NEDD4	NEDD4L;NEDD4
NaN	NaN	NaN	NaN	NaN	3.32207			4	4	4	16.4	16.4	16.4	31.791	9.1794	124490000	11731000	112750000	0	NaN	0	3.32207	Q9H3N1;G3V448	Q9H3N1	Thioredoxin-related transmembrane protein 1	TMX1
1.99592	4.18547	3.6663	3.55839	2.96787	NaN			5	5	5	31.2	31.2	31.2	21.127	37.045	942840000	77224000	865620000	1.41806	3.28256	1.24073	3.26313	Q5T8U5;O15260-2;O15260;O15260-3;B7Z1G8	Q5T8U5;O15260-2;O15260;O15260-3	Surfeit locus protein 4	SURF4
2.44374	2.70695	2.78526	NaN	3.25776	NaN	+		4	4	4	13.5	13.5	13.5	34.114	11.41	423730000	115970000	307750000	2.81781	2.64532	0	3.25776	O95159;E9PQA5;E9PQ47;E9PNY1;H0YCU8;E9PMQ3	O95159;E9PQA5;E9PQ47;E9PNY1	Zinc finger protein-like 1	ZFPL1
3.14701	2.93238	3.29134	3.25632	NaN	NaN	+		6	6	6	16.1	16.1	16.1	52.764	37.279	793900000	132240000	661650000	2.95361	3.12358	0	3.25632	Q96N66;Q96N66-3;Q96N66-2;A9C4B8;H7C2M4;C9J4E9;A0A0G2JNX6;M0R1Z5	Q96N66;Q96N66-3;Q96N66-2	Lysophospholipid acyltransferase 7	MBOAT7
NaN	3.05728	NaN	2.67846	NaN	3.48478			5	4	4	22.9	18.8	18.8	23.818	21.965	200240000	12098000	188140000	0	3.05728	1.08188	3.08162	O15173;O15173-2;U3KQM0	O15173;O15173-2	Membrane-associated progesterone receptor component 2	PGRMC2
NaN	NaN	NaN	NaN	NaN	2.91932			2	2	2	16.3	16.3	16.3	16.696	4.5372	5665800	329870	5336000	0	NaN	0	2.91932	B1AHF3;P00387-2;P00387;P00387-3	B1AHF3;P00387-2;P00387;P00387-3	NADH-cytochrome b5 reductase 3;NADH-cytochrome b5 reductase 3 membrane-bound form;NADH-cytochrome b5 reductase 3 soluble form	CYB5R3
NaN	NaN	NaN	2.72207	NaN	NaN			2	2	2	33.8	33.8	33.8	7.2883	5.0016	2033100	348300	1684800	0	NaN	0	2.72207	F5H895;A0A0B4J239;F5GXX5;P61803	F5H895;A0A0B4J239;F5GXX5;P61803	Dolichyl-diphosphooligosaccharide--protein glycosyltransferase subunit DAD1	DAD1
NaN	NaN	NaN	NaN	2.70649	NaN			3	3	3	7.5	7.5	7.5	62.924	5.8976	2629400	315970	2313500	0	NaN	0	2.70649	O15270;H0YJV2	O15270	Serine palmitoyltransferase 2	SPTLC2
NaN	NaN	NaN	NaN	NaN	2.66596			2	2	2	9.3	9.3	9.3	23.238	4.8698	9574000	737550	8836500	0	NaN	0	2.66596	G3V229;Q99675;G3V412	G3V229;Q99675;G3V412	Cell growth regulator with RING finger domain protein 1	CGRRF1
NaN	NaN	NaN	NaN	2.27283	2.8503			6	6	6	16.4	16.4	16.4	54.366	12.469	53604000	6842600	46762000	0	NaN	1.14595	2.56156	O75439;G3V0E4;F8WAZ6;F8WEA6;F8WBE1	O75439;G3V0E4	Mitochondrial-processing peptidase subunit beta	PMPCB
1.04928	3.38101	3.05363	NaN	NaN	2.39273			12	12	12	29.3	29.3	29.3	67.723	155.61	898000000	213430000	684570000	1.12044	2.49464	0	2.39273	P04844-2;P04844;Q5JYR4;Q5JYR7;Q5JYR3;H0Y5M1;F2Z3K5	P04844-2;P04844	Dolichyl-diphosphooligosaccharide--protein glycosyltransferase subunit 2	RPN2
2.31481	2.70786	2.60559	NaN	2.38973	NaN	+		11	11	11	62.8	62.8	62.8	25.468	54.467	1371600000	394170000	977430000	2.67022	2.54275	0	2.38973	P04183;K7ERV3;K7ES52;K7ERJ1;K7ENW5	P04183;K7ERV3;K7ES52;K7ERJ1	Thymidine kinase, cytosolic;Thymidine kinase	TK1
NaN	NaN	NaN	NaN	2.34781	NaN			3	3	3	4.7	4.7	4.7	93.307	2.55	2300300	405820	1894500	0	NaN	0	2.34781	P45974-2;P45974	P45974-2;P45974	Ubiquitin carboxyl-terminal hydrolase 5	USP5
NaN	NaN	NaN	NaN	NaN	2.31655			3	3	3	19.7	19.7	19.7	18.429	3.3662	25011000	530820	24480000	0	NaN	0	2.31655	C9K0C3;Q6UWP7-2;Q6UWP7-3;Q6UWP7;C9J5S5;C9JA02;C9JMW2;C9JUV9;C9JXY8;C9J6F4	C9K0C3;Q6UWP7-2;Q6UWP7-3;Q6UWP7	Lysocardiolipin acyltransferase 1	LCLAT1
NaN	NaN	NaN	1.94845	NaN	2.61791			3	3	3	9.1	9.1	9.1	41.26	8.3719	79060000	10853000	68207000	0	NaN	1.03305	2.28318	B4DSN5;P18031	B4DSN5;P18031	Tyrosine-protein phosphatase non-receptor type;Tyrosine-protein phosphatase non-receptor type 1	PTPN1
NaN	0.616264	NaN	1.66453	2.85758	NaN			3	3	3	10.2	10.2	10.2	44.992	10.09	174870000	94041000	80830000	0	0.616264	0.784586	2.26106	E7EMB6;E7ETB3;Q9ULA0;B9ZVU2;F8WAN0	E7EMB6;E7ETB3;Q9ULA0	Aspartyl aminopeptidase	DNPEP
2.97301	3.21168	2.57937	NaN	NaN	2.24315	+		9	9	9	35.2	35.2	35.2	37.375	35.091	236950000	30864000	206090000	2.40247	2.92135	0	2.24315	Q9UJ70;Q9UJ70-2;C9JEV6;H7C3G9;H7C286;H0YF44;H7C1L7;H0YEB7;H0YE82	Q9UJ70;Q9UJ70-2;C9JEV6;H7C3G9;H7C286	N-acetyl-D-glucosamine kinase	NAGK
1.53749	NaN	2.52927	NaN	2.54067	1.87712			8	8	8	51.3	51.3	51.3	22.391	61.791	286130000	232890000	53238000	0.817351	2.03338	1.02268	2.20889	P37802;P37802-2;X6RJP6;C9J5W6;Q9UI15	P37802;P37802-2;X6RJP6	Transgelin-2	TAGLN2
1.29472	2.39342	2.16337	NaN	2.13422	NaN			7	7	7	42	42	42	25.035	83.95	746580000	514270000	232310000	1.55004	1.9505	0	2.13422	P30041	P30041	Peroxiredoxin-6	PRDX6
NaN	NaN	NaN	NaN	NaN	2.12578			2	2	2	5.1	5.1	5.1	59.271	2.0947	3407100	688650	2718500	0	NaN	0	2.12578	O15355	O15355	Protein phosphatase 1G	PPM1G
3.02373	2.88237	NaN	NaN	2.05106	NaN			9	9	9	13.1	13.1	13.1	111.82	24.795	159580000	23126000	136450000	1.81716	2.95305	0	2.05106	E5KLK1;E5KLJ6;E5KLJ9;E5KLJ5;O60313;O60313-2;H7C141	E5KLK1;E5KLJ6;E5KLJ9;E5KLJ5;O60313;O60313-2	Dynamin-like 120 kDa protein, mitochondrial;Dynamin-like 120 kDa protein, form S1	OPA1
0.095722	0.0832474	0.0783365	NaN	1.8528	NaN	+		59	59	54	34.5	34.5	32.3	212.27	317.04	10870000000	6283100000	4586700000	2.44126	0.0857686	0	1.8528	Q9Y4I1-2;Q9Y4I1;A0A087WY00;G3V394;F8W6H6;Q9Y4I1-3;F8WE88;E7ERV5;O95317;Q9UES5;Q9NQX4;H0YMK3;Q9NQX4-2;G3V3C9;H0YM93;H0YM96	Q9Y4I1-2;Q9Y4I1;A0A087WY00;G3V394;F8W6H6;Q9Y4I1-3;F8WE88	Unconventional myosin-Va	MYO5A
1.7458	1.71348	NaN	1.82497	NaN	NaN	+		4	4	4	8.4	8.4	8.4	66.558	10.728	33052000	10478000	22574000	2.22563	1.72964	0	1.82497	P08240-2;P08240	P08240-2;P08240	Signal recognition particle receptor subunit alpha	SRPR
NaN	NaN	NaN	NaN	NaN	1.77741			2	2	2	4.2	4.2	4.2	51.851	4.2223	55908000	19998000	35910000	0	NaN	0	1.77741	O75306-2;O75306	O75306-2;O75306	NADH dehydrogenase [ubiquinone] iron-sulfur protein 2, mitochondrial	NDUFS2
1.61282	1.45386	1.52902	0.632082	2.49937	1.95635	+		8	6	6	40.3	31.9	31.9	24.336	20.429	2853800000	1150300000	1703500000	3.0472	1.5319	1.03458	1.69594	P31947-2;P31947	P31947-2;P31947	14-3-3 protein sigma	SFN
NaN	NaN	NaN	NaN	1.67559	NaN			5	5	5	10.4	10.4	10.4	69.917	8.5831	72504000	51519000	20986000	0	NaN	0	1.67559	Q9NQW7;Q9NQW7-3;Q5T6H7;Q9NQW7-2;Q9NQW7-4;Q5T6H3;Q5T6H2;E9PFW2;O00462	Q9NQW7;Q9NQW7-3;Q5T6H7;Q9NQW7-2;Q9NQW7-4	Xaa-Pro aminopeptidase 1	XPNPEP1
0.262553	NaN	1.87845	NaN	1.67509	NaN			6	3	3	43.9	15	15	20.511	7.4635	129610000	43154000	86456000	0.385533	1.0705	0	1.67509	P18085;C9JPM4;C9JAK5;U3KQF2	P18085;C9JPM4;C9JAK5	ADP-ribosylation factor 4	ARF4
NaN	0.772308	0.649202	1.65008	NaN	NaN			7	7	7	3.1	3.1	3.1	287.37	17.355	89178000	40219000	48959000	1.25967	0.710755	0	1.65008	O75962-5;O75962-2;O75962;E7EWP2;O75962-4;F5H228;E7EPJ7;A0A087X139	O75962-5;O75962-2;O75962;E7EWP2;O75962-4;F5H228;E7EPJ7	Triple functional domain protein	TRIO
2.44233	NaN	2.05196	NaN	1.6318	NaN			4	4	4	9	9	9	67.567	6.449	83259000	21554000	61705000	1.25839	2.24715	0	1.6318	P27824;P27824-2;H0Y9Q7;D6RAQ8;D6RAU8;D6RB85;D6RDP7;P27824-3;D6RHJ3;D6RD16;D6RFL1;H0Y9H1;D6RGY2	P27824;P27824-2;H0Y9Q7;D6RAQ8;D6RAU8;D6RB85;D6RDP7;P27824-3	Calnexin	CANX
NaN	NaN	NaN	NaN	NaN	1.60398			2	2	2	2.1	2.1	2.1	99.692	5.0943	81661000	47398000	34262000	0	NaN	0	1.60398	A0JP02;B4DJX4;Q9HAU0-5;Q9HAU0-8;Q9HAU0;Q9HAU0-2;Q9HAU0-4;Q9HAU0-6;Q9HAU0-3	A0JP02;B4DJX4;Q9HAU0-5;Q9HAU0-8;Q9HAU0;Q9HAU0-2;Q9HAU0-4;Q9HAU0-6;Q9HAU0-3	Pleckstrin homology domain-containing family A member 5	PLEKHA5
NaN	NaN	NaN	1.58227	NaN	NaN			2	2	1	10.3	10.3	5.2	27.145	3.216	4669400	1123500	3545900	0	NaN	0	1.58227	H0YBA4;Q9H0M0-6;Q9H0M0-3;Q9H0M0;Q96J02-3;Q96J02-2	H0YBA4;Q9H0M0-6;Q9H0M0-3;Q9H0M0;Q96J02-3;Q96J02-2	NEDD4-like E3 ubiquitin-protein ligase WWP1;E3 ubiquitin-protein ligase Itchy homolog	WWP1;ITCH
NaN	NaN	NaN	NaN	NaN	1.57129			2	2	2	4.3	4.3	4.3	66.921	4.1521	5762300	1785800	3976400	0	NaN	0	1.57129	B4DJ81;P28331-3;P28331-4;P28331-5;P28331;P28331-2	B4DJ81;P28331-3;P28331-4;P28331-5;P28331;P28331-2	NADH-ubiquinone oxidoreductase 75 kDa subunit, mitochondrial	NDUFS1
NaN	NaN	NaN	1.56086	NaN	NaN			1	1	1	1.8	1.8	1.8	74.052	1.8951	2122900	705430	1417500	0	NaN	0	1.56086	Q16650	Q16650	T-box brain protein 1	TBR1
NaN	NaN	NaN	NaN	1.54799	NaN			3	3	3	4.3	4.3	4.3	105.85	5.0818	2837000	590420	2246500	0	NaN	0	1.54799	A0A087WW66;Q99460-2;Q99460;H7C378	A0A087WW66;Q99460-2;Q99460;H7C378	26S proteasome non-ATPase regulatory subunit 1	PSMD1
1.64727	1.59741	1.57986	1.46671	NaN	NaN	+		21	21	21	21.5	21.5	21.5	149.61	95.055	2027900000	672600000	1355300000	3.80245	1.60818	0	1.46671	Q86UP2-2;Q86UP2-3;Q86UP2-4;Q86UP2;G3V4Y7;B7Z6P3;H0YJP2;H0YJZ8;G3V5G2;G3V5P0	Q86UP2-2;Q86UP2-3;Q86UP2-4;Q86UP2;G3V4Y7	Kinectin	KTN1
NaN	NaN	NaN	NaN	1.4599	NaN			1	1	1	5.9	5.9	5.9	28.102	3.7704	21930000	4144200	17785000	0	NaN	0	1.4599	D6RCD0;Q8NBQ5	D6RCD0;Q8NBQ5	Estradiol 17-beta-dehydrogenase 11	HSD17B11
1.49436	1.71611	1.78333	1.2212	NaN	1.69136	+		8	8	8	14	14	14	70.702	35.315	1238500000	378220000	860250000	2.56235	1.6646	0.991879	1.45628	Q14739;C9JXK0;C9JES9	Q14739;C9JXK0	Lamin-B receptor	LBR
3.2603	NaN	3.16866	1.65145	1.22725	NaN			5	5	5	7.4	7.4	7.4	91.706	18.57	78263000	8308800	69954000	2.04221	3.21448	1.03085	1.43935	Q96QK1	Q96QK1	Vacuolar protein sorting-associated protein 35	VPS35
2.17447	2.15575	2.14802	1.14117	1.73544	NaN	+		8	8	8	35.2	35.2	35.2	30.241	37.196	285280000	78627000	206650000	4.87877	2.15941	0.887088	1.4383	O75489;E9PS48;O75489-2	O75489	NADH dehydrogenase [ubiquinone] iron-sulfur protein 3, mitochondrial	NDUFS3
NaN	NaN	NaN	NaN	1.39715	NaN			3	3	3	9.5	9.5	9.5	44.784	18.102	109480000	15443000	94041000	0	NaN	0	1.39715	P62195-2;P62195;J3QQM1;J3QRR3;J3QLH6;J3KRP2;J3QSA9	P62195-2;P62195;J3QQM1	26S protease regulatory subunit 8	PSMC5
NaN	NaN	2.59663	NaN	1.39687	NaN			3	3	3	13.5	13.5	13.5	33.337	25.125	182790000	26254000	156540000	0	2.59663	0	1.39687	Q9UJZ1-2;Q9UJZ1;F2Z2I8;A0A087WYB4	Q9UJZ1-2;Q9UJZ1	Stomatin-like protein 2, mitochondrial	STOML2
NaN	-0.498423	-0.0263373	0.588421	1.82737	1.53092			3	3	3	0.4	0.4	0.4	964.83	4.1549	2025100000	1343100000	682020000	0.331249	-0.26238	1.14261	1.31557	E7ENN3;A0A0C4DG40;Q8NF91-4;Q8NF91;Q8NF91-8;Q8NF91-2;Q8NF91-7	E7ENN3;A0A0C4DG40;Q8NF91-4;Q8NF91;Q8NF91-8;Q8NF91-2	Nesprin-1	SYNE1
NaN	NaN	NaN	1.28309	NaN	NaN			3	3	3	3.9	3.9	3.9	96.9	4.6637	2380600	757050	1623500	0	NaN	0	1.28309	Q92973-3;Q92973-2;Q92973;E7EW37;A0A075B780;O14787-2;O14787	Q92973-3;Q92973-2;Q92973	Transportin-1	TNPO1
1.12565	1.69924	NaN	NaN	1.50899	0.974676			5	5	5	25.1	25.1	25.1	34.614	31.811	78235000	30018000	48217000	0.894385	1.41245	0.869988	1.24183	E9PKD5;E9PM69;R4GNH3;P17980;E9PMD8;E9PN50;E9PLG2	E9PKD5;E9PM69;R4GNH3;P17980;E9PMD8	26S protease regulatory subunit 6A	PSMC3
0.820404	0.847275	NaN	NaN	1.21481	NaN			6	6	6	7.1	7.1	7.1	123.75	20.148	110150000	57206000	52942000	1.98897	0.83384	0	1.21481	H0Y8C6;O00410;O00410-3;O00410-2;C9JZD8;C9J875;C9JQT6;E7ESA1;E7ESZ1;E7EWK4;E7EX05;E7EQT5;E7ETV8;E7EV12;C9JMV5;E7ETV3;O60518	H0Y8C6;O00410;O00410-3;O00410-2	Importin-5	IPO5
2.45228	2.62237	1.13481	1.21363	NaN	NaN			3	3	3	8.5	8.5	8.5	54.083	19.566	301760000	74149000	227610000	1.31964	2.06982	0	1.21363	P11166	P11166	Solute carrier family 2, facilitated glucose transporter member 1	SLC2A1
1.95464	2.00906	2.02443	NaN	0.943059	1.29531	+		16	16	16	58.2	58.2	58.2	44.868	139.52	6961400000	2009500000	4951900000	3.94897	1.99604	1.00274	1.11919	P31689;P31689-2	P31689;P31689-2	DnaJ homolog subfamily A member 1	DNAJA1
1.05506	1.16318	1.1375	NaN	NaN	1.09309	+		18	18	18	59	59	59	34.333	175.27	9076200000	3930200000	5146100000	3.07107	1.11858	0	1.09309	O15144;C9JTV5;G5E9J0;H7C3F9;G5E9S7	O15144	Actin-related protein 2/3 complex subunit 2	ARPC2
-0.202804	-0.130429	-0.285548	NaN	1.07348	NaN			8	8	8	46.1	46.1	46.1	25.097	75.531	2697600000	1684500000	1013100000	1.35553	-0.20626	0	1.07348	P06730;P06730-2;D6RBW1;P06730-3;H0Y8J7;D6RFJ3;D6RHE2;H0Y8X3;A6NMX2	P06730;P06730-2;D6RBW1;P06730-3;H0Y8J7	Eukaryotic translation initiation factor 4E	EIF4E
1.7479	2.5929	2.52158	1.03787	NaN	NaN			4	4	4	4	4	4	88.583	7.6891	269970000	67511000	202460000	1.86317	2.28746	0	1.03787	Q9Y4W6;B7Z651;A0A0U1RQN6;E9PHW9;I6L894;Q01484-5;Q01484-2;Q01484	Q9Y4W6	AFG3-like protein 2	AFG3L2
0.131194	0.17479	0.227987	1.0371	NaN	NaN			32	32	32	34.9	34.9	34.9	134.41	196.03	8921500000	5044800000	3876700000	1.62262	0.177991	0	1.0371	A1L390;A1L390-3;A0A0U1RR71;G3V311;A1L390-2;G3V278;G3V3I3;C9J7S4;C9JVL3;E7ESZ3;H7BXC7;Q9H7P9-2;Q9H7P9-3;Q9H7P9	A1L390;A1L390-3;A0A0U1RR71	Pleckstrin homology domain-containing family G member 3	PLEKHG3
NaN	1.18358	1.62831	NaN	0.868608	1.19232			24	2	0	66.3	6.5	0	46.297	9.6594	935210000	341020000	594180000	1.00061	1.40594	1.00356	1.03046	Q71U36-2;Q71U36;F8VQQ4	Q71U36-2;Q71U36;F8VQQ4	Tubulin alpha-1A chain	TUBA1A
1.83786	1.98444	1.81824	0.874128	1.03203	1.05374	+	+	33	33	33	66.1	66.1	66.1	61.054	323.31	11297000000	4152600000	7144500000	3.10961	1.88018	2.48482	0.986632	P10809;E7ESH4;E7EXB4;P10809-2;C9JL25;C9JL19;C9JCQ4;C9J0S9	P10809	60 kDa heat shock protein, mitochondrial	HSPD1
-0.326208	-0.0601566	-0.0580223	0.786094	1.05582	1.0784			9	9	9	36.2	36.2	36.2	43.312	100.18	6388200000	3994600000	2393600000	0.623246	-0.148129	2.0373	0.97344	K7EQ55;K7EK33;Q96EP5-2;Q96EP5;K7EQ02	K7EQ55;K7EK33;Q96EP5-2;Q96EP5;K7EQ02	DAZ-associated protein 1	DAZAP1
0.913876	0.31904	0.753861	0.864018	NaN	1.07799			7	7	7	14.6	14.6	14.6	67.14	10.804	199780000	99586000	100200000	1.18667	0.662259	1.15575	0.971006	P54136-2;P54136	P54136-2;P54136	Arginine--tRNA ligase, cytoplasmic	RARS
2.1413	1.79764	2.05547	0.930018	1.03738	0.907737	+	+	22	2	2	57.6	5.3	5.3	49.959	11.252	465760000	130780000	334980000	2.57506	1.99814	2.75961	0.958379	Q13748;Q13748-2;Q6PEY2;C9JEV8;C9JQ00;C9JJQ8;V9GZ17;C9JDL2;C9K0S6;F8VXZ7;F8W0F6	Q13748;Q13748-2;Q6PEY2	Tubulin alpha-3C/D chain;Tubulin alpha-3E chain	TUBA3C;TUBA3E
0.504671	0.574247	0.407625	1.02998	0.90512	0.9387		+	15	15	9	80.1	80.1	52.4	18.502	150.39	7239800000	4586100000	2653700000	2.02805	0.495514	2.8201	0.957934	P23528;E9PP50;E9PK25;G3V1A4;E9PQB7;E9PS23;E9PLJ3	P23528;E9PP50;E9PK25;G3V1A4;E9PQB7	Cofilin-1	CFL1
NaN	NaN	NaN	NaN	NaN	0.954866			2	2	2	6.6	6.6	6.6	40.161	3.192	384720000	1361200	383360000	0	NaN	0	0.954866	B4DWJ1;E9PEI4;H0YB16;H0YBZ1;H0YBP1;E7ESA6;Q05397-6;Q05397-2;Q05397-7;Q05397;Q05397-5;E5RHD8;E5RI03;E5RJQ2;E5RG80	B4DWJ1;E9PEI4;H0YB16;H0YBZ1;H0YBP1;E7ESA6;Q05397-6;Q05397-2;Q05397-7;Q05397;Q05397-5;E5RHD8;E5RI03;E5RJQ2;E5RG80	Focal adhesion kinase 1	PTK2
0.528871	0.728661	0.578311	NaN	0.949348	NaN			3	3	3	6.7	6.7	6.7	60.221	24.079	297250000	155180000	142060000	2.02224	0.611948	0	0.949348	P52294;C9JYI4;O60684;O15131;H0Y3K0;C9J352;C9JWD9;F2Z3G4;C9J4U1;Q5TFJ7	P52294;C9JYI4;O60684;O15131	Importin subunit alpha-5;Importin subunit alpha-5, N-terminally processed;Importin subunit alpha-7;Importin subunit alpha-6	KPNA1;KPNA6;KPNA5
2.14274	2.1746	1.8635	NaN	0.90273	0.984188	+		15	15	15	32.9	32.9	32.9	65.308	79.854	1500200000	463090000	1037100000	2.63968	2.06028	1.56121	0.943459	P30153;B3KQV6;C9J9C1;E9PH38;P30154-5;P30154-4;P30154;P30154-2;H0YDG7;P30154-3;E9PPI5;E9PNM7;E9PHZ6	P30153;B3KQV6;C9J9C1	Serine/threonine-protein phosphatase 2A 65 kDa regulatory subunit A alpha isoform	PPP2R1A
-1.50902	0.534858	0.377179	0.960289	0.921969	0.942758		+	26	14	14	40.4	19.7	19.7	84.659	323.31	5452100000	5158300000	293790000	0.102123	-0.198994	3.85918	0.941672	P07900;P07900-2;G3V2J8;Q14568;Q58FF6;Q58FG0;Q58FG1	P07900;P07900-2	Heat shock protein HSP 90-alpha	HSP90AA1
NaN	NaN	NaN	0.941181	NaN	NaN			3	3	3	11.3	11.3	11.3	32.544	9.2086	44389000	20969000	23420000	0	NaN	0	0.941181	Q8WWC4;H7C0V0	Q8WWC4	Uncharacterized protein C2orf47, mitochondrial	C2orf47
1.32889	1.3133	1.35676	0.887057	0.939678	0.98499	+	+	91	91	91	24.6	24.6	24.6	469.08	323.31	8300100000	3338500000	4961600000	4.04131	1.33299	3.04081	0.937242	P78527;P78527-2;F5GX40;H0YG84	P78527;P78527-2	DNA-dependent protein kinase catalytic subunit	PRKDC
1.84531	2.4401	2.32731	NaN	0.936892	NaN	+		6	6	6	15.7	15.7	15.7	57.206	24.316	342420000	98632000	243790000	2.16892	2.20424	0	0.936892	P30837	P30837	Aldehyde dehydrogenase X, mitochondrial	ALDH1B1
0.530271	0.918234	0.921893	NaN	NaN	0.932742			6	6	6	6.7	6.7	6.7	129.57	26.988	410170000	230360000	179800000	1.58514	0.790132	0	0.932742	Q13751	Q13751	Laminin subunit beta-3	LAMB3
NaN	-0.193998	NaN	0.832039	1.11183	0.845028			4	4	4	4.4	4.4	4.4	134.42	15.213	188390000	106580000	81814000	0	-0.193998	2.02307	0.929633	Q96R06;K7ELG0;K7ELC8;E9PMD0	Q96R06;K7ELG0	Sperm-associated antigen 5	SPAG5
0.960215	1.15114	1.04956	1.04907	0.917928	0.817869	+	+	15	15	15	44.9	44.9	44.9	44.76	173.6	12170000000	5459300000	6710300000	2.56401	1.05364	2.28732	0.92829	P61160;P61160-2;F5H6T1	P61160;P61160-2;F5H6T1	Actin-related protein 2	ACTR2
1.37662	1.8031	0.894682	0.778293	1.03429	0.958954			8	8	8	40.6	40.6	40.6	28.821	33.45	881910000	343940000	537970000	1.45148	1.35814	2.17446	0.923844	E9PK01;P29692;A0A087X1X7;E9PRY8;P29692-3;P29692-2;E9PPR1;E9PL12;E9PQ49;E9PI39;E9PMW7;E9PL71;E9PQZ1;P29692-4;E9PN91;E9PIZ1;H0YCK7;E9PK06;E9PQC9;E9PKK3;E9PK72;H0YE58;H0YE72;E9PNW6;E9PJD0	E9PK01;P29692;A0A087X1X7;E9PRY8;P29692-3;P29692-2;E9PPR1;E9PL12;E9PQ49;E9PI39;E9PMW7;E9PL71;E9PQZ1;P29692-4;E9PN91;E9PIZ1;H0YCK7	Elongation factor 1-delta	EEF1D
-0.329051	-0.167766	-0.300448	0.948451	0.890252	0.900567		+	71	71	71	51.9	51.9	51.9	192.06	323.31	24921000000	15712000000	9209300000	1.47858	-0.265755	3.41414	0.91309	A0A087WVQ6;Q00610-2;Q00610;J3KS13;A0A087WX41;P53675-2;P53675;K7EJJ5;J3KSQ2;J3KRF5;J3QL20;F5H5N6	A0A087WVQ6;Q00610-2;Q00610	Clathrin heavy chain;Clathrin heavy chain 1	CLTC
NaN	NaN	NaN	1.03541	0.900413	0.797262		+	5	5	5	6.6	6.6	6.6	92.48	6.5753	31946000	15670000	16276000	0	NaN	2.24567	0.911029	P55884;P55884-2;C9JZG1	P55884;P55884-2	Eukaryotic translation initiation factor 3 subunit B	EIF3B
NaN	NaN	NaN	1.17977	0.937194	0.608431			10	10	10	8.1	8.1	8.1	170.59	31.001	64438000	37479000	26959000	0	NaN	1.49973	0.908463	P07814;V9GYZ6;V9GZ76	P07814;V9GYZ6	Bifunctional glutamate/proline--tRNA ligase;Glutamate--tRNA ligase;Proline--tRNA ligase	EPRS
0.84326	NaN	0.586597	0.948003	NaN	0.852558			6	6	6	21	21	21	37.563	27.875	172420000	81866000	90555000	0.946649	0.714929	1.47218	0.90028	O00303;H0YDT6;E9PQV8	O00303;H0YDT6	Eukaryotic translation initiation factor 3 subunit F	EIF3F
2.1128	2.27983	2.39523	0.887837	0.96451	0.809497	+	+	8	8	8	11.7	11.7	11.7	99.31	32.574	806540000	405230000	401310000	2.88263	2.26262	2.5962	0.887281	A0A087WVM4;B7ZM99;Q6UB35;Q4VXM1;Q4VXM0;H0Y327	A0A087WVM4;B7ZM99;Q6UB35	Monofunctional C1-tetrahydrofolate synthase, mitochondrial	MTHFD1L
0.472176	0.606253	0.637935	NaN	0.886511	NaN			15	11	11	68.2	53.8	53.8	32.949	245.83	4260600000	2305500000	1955100000	2.1083	0.572121	0	0.886511	P47755;F8W9N7;C9JUG7;A0A0D9SET8;P47755-2;F8WED3	P47755;F8W9N7	F-actin-capping protein subunit alpha-2	CAPZA2
1.39682	1.52472	1.20502	0.838992	0.925696	0.876095	+	+	25	25	2	61.4	61.4	3.1	50.151	323.31	49813000000	18670000000	31143000000	2.34384	1.37552	3.08986	0.880261	P68363;P68366-2;P68366;P68363-2;C9JDS9	P68363;P68366-2;P68366;P68363-2	Tubulin alpha-1B chain;Tubulin alpha-4A chain	TUBA1B;TUBA4A
2.3764	2.24175	1.94002	0.764601	0.944034	0.915942	+	+	16	16	16	46.6	46.6	46.6	48.442	148.64	3011700000	799270000	2212500000	2.46031	2.18606	2.39445	0.874859	P22695;H3BRG4;H3BSJ9;H3BP04;H3BUE4;H3BUI9;A0A087WVZ4	P22695;H3BRG4;H3BSJ9;H3BP04	Cytochrome b-c1 complex subunit 2, mitochondrial	UQCRC2
0.242938	0.277509	0.211261	1.13416	0.62396	0.819096	+		58	58	58	43.2	43.2	43.2	200.84	323.31	11583000000	6278400000	5304500000	2.21499	0.243903	1.54283	0.859071	O95425-2;O95425-4;O95425-3;O95425;A0A0J9YWY6	O95425-2;O95425-4;O95425-3;O95425;A0A0J9YWY6	Supervillin	SVIL
0.00949053	-0.0316217	-0.0985519	0.61372	1.14457	0.783918			59	59	59	59	59	59	120.18	323.31	70895000000	39397000000	31497000000	0.481992	-0.0402277	1.48873	0.847402	Q69YQ0-2;Q69YQ0;F8WAN1;C9J8U1;C9JLY8	Q69YQ0-2;Q69YQ0;F8WAN1;C9J8U1	Cytospin-A	SPECC1L;SPECC1L-ADORA2A
3.64674	3.3897	3.59395	NaN	0.84141	NaN	+		15	15	15	56.2	56.2	56.2	40.968	233.85	4109900000	414140000	3695700000	3.31081	3.54346	0	0.84141	P78406;E9PQ57;E9PPG9;B0QZ36;B0QZ37	P78406;E9PQ57;E9PPG9	mRNA export factor	RAE1
0.418999	0.29066	0.515813	0.825948	0.852319	0.827494		+	30	30	30	53.5	53.5	53.5	54.169	323.31	38034000000	18615000000	19419000000	1.60999	0.408491	3.98037	0.835254	P19474;P19474-2;H0YDP8	P19474;P19474-2	E3 ubiquitin-protein ligase TRIM21	TRIM21
NaN	NaN	1.97475	0.951662	0.673014	0.86671			2	2	2	8.7	8.7	8.7	29.573	12.593	316740000	99159000	217580000	0	1.97475	2.01257	0.830462	C9J3L8;C9J5W0;E9PAL7;C9IZQ1;P43307-2;P43307	C9J3L8;C9J5W0;E9PAL7;C9IZQ1;P43307-2;P43307	Translocon-associated protein subunit alpha	SSR1
-0.0124463	0.874049	1.69162	1.19421	0.600079	0.692695			3	3	3	5.6	5.6	5.6	53.085	5.139	101380000	42861000	58523000	0.646205	0.851076	1.33576	0.828996	Q5SZU1;O43175	Q5SZU1;O43175	D-3-phosphoglycerate dehydrogenase	PHGDH
-0.263802	-0.215563	-0.287624	NaN	NaN	0.806283	+		14	14	14	35.1	35.1	35.1	66.193	98.896	2861400000	1814900000	1046500000	2.16725	-0.255663	0	0.806283	O75083;O75083-3;D6RD66	O75083;O75083-3;D6RD66	WD repeat-containing protein 1	WDR1
1.50416	1.53162	1.64446	0.893518	0.738465	0.768417	+	+	15	15	15	19.4	19.4	19.4	110.61	73.696	510650000	262640000	248010000	3.12133	1.56008	2.45548	0.800133	F5H2F4;P11586;V9GYY3	F5H2F4;P11586	C-1-tetrahydrofolate synthase, cytoplasmic;Methylenetetrahydrofolate dehydrogenase;Methenyltetrahydrofolate cyclohydrolase;Formyltetrahydrofolate synthetase;C-1-tetrahydrofolate synthase, cytoplasmic, N-terminally processed	MTHFD1
1.57134	1.26285	1.51561	0.798921	NaN	NaN	+		20	2	0	56.5	5.9	0	49.585	17.808	783930000	285700000	498230000	2.37082	1.44993	0	0.798921	P04350;M0R2D3;M0QY85;M0QYM7;M0R278;M0R0X0;M0QY37;M0QX14;M0R042;M0QZL7;M0R1I1;M0R2T4;A0A075B724	P04350	Tubulin beta-4A chain	TUBB4A
2.33067	2.2577	1.8899	NaN	1.29119	0.305562	+		7	7	7	32.7	32.7	32.7	29.804	31.463	343040000	94815000	248230000	2.40165	2.15943	0.453378	0.798377	P35232;C9JW96;C9JZ20;E7ESE2;E9PCW0;P35232-2;D6RBK0	P35232;C9JW96;C9JZ20;E7ESE2;E9PCW0;P35232-2;D6RBK0	Prohibitin	PHB
NaN	NaN	NaN	0.336398	1.62307	0.422125			3	3	3	2.1	2.1	2.1	166.48	2.0009	196920000	100890000	96031000	0	NaN	0.707478	0.793865	P16157-2;P16157-11;P16157-9;P16157-6;P16157-7;P16157-4;P16157-13;P16157-10;P16157-15;P16157-8;P16157-5;P16157-16;P16157-3;P16157;P16157-21;P16157-12;P16157-14;H0YBS0	P16157-2;P16157-11;P16157-9;P16157-6;P16157-7;P16157-4;P16157-13;P16157-10;P16157-15;P16157-8;P16157-5;P16157-16;P16157-3;P16157;P16157-21;P16157-12;P16157-14;H0YBS0	Ankyrin-1	ANK1
0.160275	-0.16225	0.186881	0.783163	0.811307	0.756682		+	15	15	15	22.9	22.9	22.9	85.746	34.721	453890000	275990000	177890000	0.195222	0.061635	3.39285	0.783717	O75534-2;O75534;O75534-3;O75534-4;E9PLT0;E9PLD4;E9PNG3;E9PKN4	O75534-2;O75534;O75534-3;O75534-4;E9PLT0	Cold shock domain-containing protein E1	CSDE1
NaN	NaN	NaN	0.979001	0.78266	0.572599			7	7	7	12.9	12.9	12.9	96.022	51.298	45391000	24028000	21364000	0	NaN	1.65768	0.778087	Q8WUM4;Q8WUM4-2;Q8WUM4-3;F8WDK9;C9IZF9	Q8WUM4;Q8WUM4-2	Programmed cell death 6-interacting protein	PDCD6IP
0.724563	0.778209	0.944784	0.812539	0.760689	0.757621	+	+	144	144	129	63.9	63.9	59	291.02	323.31	147910000000	68633000000	79280000000	2.18447	0.815852	3.27947	0.77695	Q14315;Q14315-2	Q14315;Q14315-2	Filamin-C	FLNC
NaN	1.6678	NaN	0.892974	0.699196	0.709379			8	8	8	13.5	13.5	13.5	83.165	15.93	99797000	27941000	71857000	0	1.6678	2.17597	0.767183	P41250;H7C443	P41250	Glycine--tRNA ligase	GARS
NaN	NaN	NaN	NaN	0.764686	NaN			3	3	2	4	4	2.8	98.972	3.5195	2619500	965130	1654300	0	NaN	0	0.764686	E9PB90;P52789;P52790	E9PB90;P52789	Hexokinase;Hexokinase-2	HK2
0.263034	0.210389	0.469678	NaN	0.656176	0.872711			7	4	4	32	21.1	21.1	28.302	38.961	582690000	328090000	254600000	1.23726	0.314367	1.04785	0.764443	P61981	P61981	14-3-3 protein gamma;14-3-3 protein gamma, N-terminally processed	YWHAG
NaN	NaN	NaN	0.351741	1.1832	0.749577			3	3	3	5.2	5.2	5.2	68.117	4.094	50242000	13535000	36708000	0	NaN	1.06209	0.761506	Q8IXI1;H3BST5;I3L2C6;H3BMP9;H3BVI5;H3BUX4;H7BXZ6;Q8IXI1-2;Q8IXI2-6;Q8IXI2-4;Q8IXI2;Q8IXI2-5;Q8IXI2-2;Q8IXI2-7;Q8IXI2-3	Q8IXI1;H3BST5;I3L2C6	Mitochondrial Rho GTPase 2	RHOT2
2.32421	2.2185	2.24853	0.766044	0.665302	0.852079	+	+	15	15	10	29.3	29.3	21.5	74.175	41.119	697750000	166810000	530940000	3.7146	2.26375	2.30183	0.761141	Q9UJS0;Q9UJS0-2;R4GN64	Q9UJS0;Q9UJS0-2	Calcium-binding mitochondrial carrier protein Aralar2	SLC25A13
2.73924	2.02375	2.9948	0.722029	0.892974	0.641916			5	5	4	11.4	11.4	9.7	60.13	9.1143	556820000	216270000	340550000	1.90675	2.58593	2.02013	0.752306	O75131;A0A087WUS8;A0A087WXR6;E5RHZ0;A0A087WYQ3;E5RFT7;E7ENV7;Q86YQ8-2;Q9HCH3-2;Q8IYJ1;Q96A23;O95741;Q9UBL6-2;Q86YQ8;Q96A23-2;Q9HCH3;O95741-2;Q9UBL6	O75131	Copine-3	CPNE3
NaN	NaN	NaN	NaN	0.897163	0.605589			3	3	3	7.3	7.3	7.3	75.69	4.7819	3529800	1668700	1861000	0	NaN	0.913622	0.751376	Q8NEM2	Q8NEM2	SHC SH2 domain-binding protein 1	SHCBP1
NaN	NaN	NaN	NaN	0.722379	0.777872			5	5	5	11.8	11.8	11.8	102	80.482	118500000	75863000	42641000	0	NaN	1.62824	0.750125	Q7KZF4;H7C597	Q7KZF4	Staphylococcal nuclease domain-containing protein 1	SND1
NaN	NaN	NaN	0.740971	NaN	NaN			3	3	3	11.1	11.1	11.1	37.709	9.1875	55784000	29611000	26173000	0	NaN	0	0.740971	E9PKG1;H7C2I1;Q99873-3;Q99873-2;Q99873-4;Q99873;E9PNR9;E9PQ98;E9PIX6;H0YDE4;A0A087X1W2	E9PKG1;H7C2I1;Q99873-3;Q99873-2;Q99873-4;Q99873;E9PNR9;E9PQ98;E9PIX6;H0YDE4	Protein arginine N-methyltransferase 1	PRMT1
NaN	NaN	NaN	NaN	0.736129	0.740712		+	2	2	2	6.1	6.1	6.1	40.188	1.8212	24061000	7789700	16271000	0	NaN	2.70429	0.73842	P08559-3;P08559;P08559-2;P08559-4;Q5JPU2;Q5JPU0;Q5JPT9;Q5JPU1	P08559-3;P08559;P08559-2;P08559-4;Q5JPU2;Q5JPU0;Q5JPT9;Q5JPU1	Pyruvate dehydrogenase E1 component subunit alpha, somatic form, mitochondrial	PDHA1
1.71083	1.67568	1.87657	0.608052	0.878294	0.691624	+		8	8	8	35.9	35.9	35.9	35.594	51.888	872000000	309640000	562360000	2.90511	1.75436	1.92476	0.72599	P67775;P62714;P67775-2;E5RHC1;H0YC23;E5RFI3;E5RHP4;E7ESG8;H0YBN9;E5RI56;H3BV22;H3BTA2;P60510	P67775;P62714;P67775-2;E5RHC1	Serine/threonine-protein phosphatase 2A catalytic subunit alpha isoform;Serine/threonine-protein phosphatase 2A catalytic subunit beta isoform;Serine/threonine-protein phosphatase	PPP2CA;PPP2CB
NaN	0.442545	NaN	0.543298	0.858777	0.773321			4	4	4	16.7	16.7	16.7	23.834	4.448	242170000	126620000	115550000	0	0.442545	1.78352	0.725132	Q9NWB6-3;Q9NWB6-2;Q9NWB6	Q9NWB6-3;Q9NWB6-2;Q9NWB6	Arginine and glutamate-rich protein 1	ARGLU1
-1.90223	0.986957	1.19893	NaN	0.722641	NaN			5	5	5	47.1	47.1	47.1	23.356	135.97	356820000	314910000	41917000	0.0299758	0.0945546	0	0.722641	P09211;A8MX94;A0A087X2E9;A0A087X243	P09211;A8MX94	Glutathione S-transferase P	GSTP1
NaN	0.376068	0.389016	NaN	0.660381	0.770533			4	4	4	24.4	24.4	24.4	17.951	11.042	107980000	65237000	42745000	1.96767	0.382542	1.3106	0.715457	P36639-4;P36639-3;P36639-2;P36639;C9J361	P36639-4;P36639-3;P36639-2;P36639	7,8-dihydro-8-oxoguanine triphosphatase	NUDT1
NaN	NaN	NaN	0.460061	0.908582	0.755144			1	1	1	2.3	2.3	2.3	36.644	2.2242	230990000	107350000	123640000	0	NaN	1.48322	0.707929	A0A087X235;A0A087WWT4;Q9H1Z9	A0A087X235;A0A087WWT4;Q9H1Z9	Tetraspanin;Tetraspanin-10	TSPAN10
0.162855	0.1956	0.262674	0.680054	0.693052	0.731183		+	54	54	54	34.1	34.1	34.1	231.1	323.31	9098500000	5163200000	3935300000	1.70896	0.207043	3.32048	0.70143	A0A0D9SFK2;Q92614-4;Q92614;Q92614-3;Q92614-2;Q92614-5;H0YEV9	A0A0D9SFK2;Q92614-4;Q92614;Q92614-3;Q92614-2;Q92614-5	Unconventional myosin-XVIIIa	MYO18A
NaN	NaN	NaN	0.700795	NaN	NaN			3	3	3	3.8	3.8	3.8	141.44	8.3317	9245400	6977300	2268100	0	NaN	0	0.700795	A0A024R4E5;Q00341;H0Y394;Q00341-2;C9JHS9;C9J739;C9JMQ6;C9JQ82;C9JBS3;C9JEJ8;A0A0U1RVI6;C9JHN6;C9JT62;C9JHS7;C9JK79;C9JHZ8;C9JES8;C9JZI8;C9J5E5;C9JIZ1	A0A024R4E5;Q00341;H0Y394;Q00341-2	Vigilin	HDLBP
NaN	NaN	NaN	0.856149	0.698752	0.543298			7	7	7	11.1	11.1	11.1	81.889	9.3168	17148000	7611800	9536000	0	NaN	1.78865	0.6994	P07384;E9PL37;E9PLX0;E9PJJ3;E9PLC9;E9PMC6;E9PJA6;E9PSA6;E9PQB3;E9PRM1	P07384	Calpain-1 catalytic subunit	CAPN1
1.84551	1.87464	1.95687	0.68446	0.703721	0.680684	+	+	17	17	6	47.7	47.7	19.5	32.852	63.336	66296000000	20263000000	46033000000	3.50816	1.89234	3.9707	0.689622	P05141	P05141	ADP/ATP translocase 2;ADP/ATP translocase 2, N-terminally processed	SLC25A5
1.30982	1.31261	1.39468	0.543694	0.486766	1.02219	+		7	7	7	23.9	23.9	23.9	42.509	17.304	557670000	154840000	402820000	3.36471	1.33903	1.24861	0.684217	Q16795;F5H0J3;H3BRM9;F5GY40	Q16795	NADH dehydrogenase [ubiquinone] 1 alpha subcomplex subunit 9, mitochondrial	NDUFA9
0.563646	0.562865	0.632361	0.731705	0.700795	0.611928	+	+	28	28	28	77.9	77.9	77.9	30.628	323.31	57547000000	30249000000	27298000000	2.81241	0.586291	2.5585	0.681476	P47756-2;B1AK87;B1AK88;P47756;B1AK85	P47756-2;B1AK87;B1AK88;P47756;B1AK85	F-actin-capping protein subunit beta	CAPZB
-0.453004	-0.631511	-1.19274	0.69207	0.816968	0.526169			10	10	10	22.2	22.2	22.2	63.276	31.876	704000000	546050000	157950000	1.11664	-0.759086	1.822	0.678402	Q53G59;Q53G59-2;J3QSX3;Q9H7R2	Q53G59;Q53G59-2;J3QSX3	Kelch-like protein 12	KLHL12
1.53426	1.44483	1.36955	0.742524	0.677982	0.610039	+	+	24	24	24	53	53	53	66.022	323.31	5353000000	1948300000	3404800000	2.96784	1.44955	2.49781	0.676848	Q07065;H3BUW6;H3BN64;H3BRM1;H3BRF9;Q96K21-4;Q96K21-3;Q96K21-2;Q96K21	Q07065	Cytoskeleton-associated protein 4	CKAP4
2.38126	0.477056	1.17018	0.595886	0.759838	0.656634		+	23	6	4	61.8	20.2	14.2	49.953	29.087	3989500000	1705400000	2284200000	0.862556	1.34283	2.29661	0.670786	Q9BVA1;Q13885	Q9BVA1;Q13885	Tubulin beta-2B chain;Tubulin beta-2A chain	TUBB2B;TUBB2A
2.06698	2.0597	1.93372	0.537147	0.706376	0.716069	+		6	6	6	22.8	22.8	22.8	35.422	31.885	1443300000	707440000	735860000	3.33894	2.02014	2.10696	0.653197	P08574	P08574	Cytochrome c1, heme protein, mitochondrial	CYC1
0.219711	0.19333	0.192952	0.597507	0.831472	0.525868	+		13	13	13	50	50	50	38.438	52.053	1719200000	1041500000	677690000	2.71734	0.201997	1.71064	0.651616	Q9Y3F4;Q9Y3F4-2;H0YH33	Q9Y3F4;Q9Y3F4-2	Serine-threonine kinase receptor-associated protein	STRAP
NaN	NaN	NaN	0.716947	0.534958	0.689746			6	6	6	7.5	7.5	7.5	104.1	15.339	20445000	9189500	11256000	0	NaN	2.12026	0.647217	Q99613-2;Q99613;B5ME19;H3BPE4	Q99613-2;Q99613;B5ME19	Eukaryotic translation initiation factor 3 subunit C;Eukaryotic translation initiation factor 3 subunit C-like protein	EIF3C;EIF3CL
2.0545	2.05001	1.8819	0.843502	0.450169	NaN	+		16	5	5	56.7	25.5	25.5	32.866	117.52	1084200000	284910000	799290000	3.09191	1.99547	0.726058	0.646835	P12236;P12235;V9GYG0;Q9H0C2	P12236;P12235	ADP/ATP translocase 3;ADP/ATP translocase 3, N-terminally processed;ADP/ATP translocase 1	SLC25A6;SLC25A4
1.93727	1.86849	1.99092	0.542506	0.788519	0.592828	+		21	21	21	56.6	56.6	56.6	49.541	267.46	11281000000	3344700000	7936100000	3.47354	1.93223	1.87236	0.641284	P49411;H3BNU3	P49411	Elongation factor Tu, mitochondrial	TUFM
0.639603	1.56852	1.815	0.716157	0.585347	0.620023		+	14	14	13	8.5	8.5	8	269.76	41.793	163480000	40107000	123370000	1.19106	1.34104	2.43054	0.640509	Q9Y490	Q9Y490	Talin-1	TLN1
-0.107928	-0.141971	-0.183163	0.504366	0.695281	0.717474			18	18	16	35.7	35.7	33.2	69.72	93.622	4475700000	2740900000	1734800000	1.65838	-0.144354	1.95786	0.63904	P51114;B4DXZ6;P51114-2;E9PFF5;P51114-3;E7EU85;C9JAJ4;C9JZE0;C9JY20;H7C4S4;C9JYQ6;C9IZ22	P51114;B4DXZ6;P51114-2;E9PFF5;P51114-3;E7EU85	Fragile X mental retardation syndrome-related protein 1	FXR1
NaN	0.657183	0.458907	NaN	NaN	0.637842			8	4	3	32.8	18.9	15.2	27.85	8.9324	302040000	153250000	148790000	0.951057	0.558045	0	0.637842	P31946-2;P31946;Q4VY20;Q4VY19;A0A0J9YWE8;A0A0J9YWZ2	P31946-2;P31946	14-3-3 protein beta/alpha;14-3-3 protein beta/alpha, N-terminally processed	YWHAB
NaN	NaN	-0.457831	0.62293	0.791356	0.486251			5	5	5	8.1	8.1	8.1	99.813	14.281	94688000	58542000	36146000	0	-0.457831	1.72465	0.633512	A0A0C4DFT3;Q12959-8;Q12959-9;Q12959-5;Q12959-3;Q12959-6;Q12959-4;Q12959;Q12959-7;Q12959-2;E7EQD7;H7C166;B4E2H8;C9IYP1;H7C325;F8W750;B5MCC5;B7Z264;E9PIW2;B7Z2T4;E9PN83;Q15700-5;Q15700-3;Q15700;Q15700-4;Q15700-2	A0A0C4DFT3;Q12959-8;Q12959-9;Q12959-5;Q12959-3;Q12959-6;Q12959-4;Q12959;Q12959-7;Q12959-2;E7EQD7	Disks large homolog 1	DLG1
0.252416	0.240497	0.211635	0.65205	0.640991	0.584578	+	+	62	62	1	60.9	60.9	2	109.08	323.31	50968000000	28840000000	22128000000	2.57728	0.234849	2.9537	0.625873	Q9P0K7-3;Q9P0K7;Q9P0K7-2	Q9P0K7-3;Q9P0K7;Q9P0K7-2	Ankycorbin	RAI14
NaN	-0.127258	NaN	NaN	0.625645	NaN			4	4	4	7	7	7	84.071	11.699	71758000	42352000	29406000	0	-0.127258	0	0.625645	F5GZP6;Q86W92-3;Q86W92-4;Q86W92-2;Q86W92;H0YFE4;E9PP16;Q8ND30-3;Q8ND30-2;Q8ND30;A0A0A0MTP2	F5GZP6;Q86W92-3;Q86W92-4;Q86W92-2;Q86W92;H0YFE4;E9PP16;Q8ND30-3;Q8ND30-2;Q8ND30	Liprin-beta-1;Liprin-beta-2	PPFIBP1;PPFIBP2
0.125387	0.366924	0.129745	0.520045	0.703987	0.635894			8	8	8	15.2	15.2	15.2	82.392	69.832	615460000	351550000	263910000	0.914869	0.207352	2.12977	0.619975	Q08J23-2;Q08J23;Q08J23-3	Q08J23-2;Q08J23;Q08J23-3	tRNA (cytosine(34)-C(5))-methyltransferase	NSUN2
-0.0580824	0.159888	0.2529	0.700617	0.585636	0.556601		+	24	24	24	14.1	14.1	14.1	254.41	74.779	1387800000	834550000	553230000	0.484001	0.118235	2.2937	0.614285	O75165;H0YA63;H0Y8Q2	O75165	DnaJ homolog subfamily C member 13	DNAJC13
1.27846	1.28582	1.309	0.880803	0.710614	0.21176	+		14	14	14	61.8	61.8	61.8	36.053	229.23	8151300000	3489900000	4661400000	4.29412	1.29109	1.01866	0.601059	P04406;P04406-2;E7EUT5;O14556	P04406;P04406-2;E7EUT5	Glyceraldehyde-3-phosphate dehydrogenase	GAPDH
1.39111	1.66894	1.81504	0.599603	NaN	NaN	+		6	6	6	37.5	37.5	37.5	27.887	22.302	182530000	68594000	113930000	2.23634	1.62503	0	0.599603	O14818;H0Y586;O14818-2;Q8TAA3-2;Q8TAA3-5;Q8TAA3;A0A087WYS6;O14818-4;F5GY34	O14818;H0Y586;O14818-2;Q8TAA3-2;Q8TAA3-5;Q8TAA3	Proteasome subunit alpha type-7;Proteasome subunit alpha type-7-like	PSMA7;PSMA8
1.04572	1.15853	1.07957	0.635894	0.604546	0.551983	+	+	22	4	4	64.3	16.7	16.7	47.766	94.677	7051300000	2997900000	4053400000	3.03106	1.09461	2.77613	0.597474	Q5JP53;P07437;Q5ST81;A6NNZ2;CON__ENSEMBL:ENSBTAP00000025008;Q9H4B7;G3V5W4;G3V3R4;G3V2N6	Q5JP53;P07437;Q5ST81	Tubulin beta chain	TUBB
2.12489	2.32328	1.97746	0.811471	0.360982	0.57889	+		15	15	12	25.4	25.4	20.7	86.478	133.64	1769800000	839100000	930710000	2.66136	2.14188	1.33511	0.583781	Q15437;Q5QPE2;Q5QPE1	Q15437	Protein transport protein Sec23B	SEC23B
-0.0502634	-0.141494	0.0144981	0.643579	0.551688	0.554638		+	19	19	19	27.5	27.5	27.5	112.15	135.91	2145900000	1289700000	856200000	0.492691	-0.0590864	2.57493	0.583302	Q96FS4;F6RY50	Q96FS4;F6RY50	Signal-induced proliferation-associated protein 1	SIPA1
1.08997	1.17645	1.15937	0.523562	0.636915	0.587845	+	+	7	7	7	43.1	43.1	43.1	21.058	67.119	4749700000	1786400000	2963200000	3.27101	1.14193	2.50078	0.582774	F8WCF6;P59998;F8WDD7;A0A0A6YYG9;P59998-3;P59998-2;H7C0A3;F8WE39;F8WDW3;R4GN08;P59998-4	F8WCF6;P59998;F8WDD7;A0A0A6YYG9;P59998-3;P59998-2;H7C0A3	Actin-related protein 2/3 complex subunit 4	ARPC4-TTLL3;ARPC4
1.76129	1.84707	1.62985	0.564329	NaN	NaN	+		3	3	3	46.4	46.4	46.4	7.8409	9.8025	878800000	330190000	548610000	2.88397	1.74607	0	0.564329	P62857	P62857	40S ribosomal protein S28	RPS28
1.18758	1.19969	1.17568	0.538538	0.525969	0.623118	+	+	25	25	1	66.1	66.1	2.7	49.83	323.31	48051000000	20253000000	27798000000	4.46801	1.18765	2.53349	0.562542	P68371	P68371	Tubulin beta-4B chain	TUBB4B
0.254473	0.283329	0.313478	0.597603	0.550999	0.53824	+	+	137	125	2	69.1	66.3	0.6	278.22	323.31	179700000000	97952000000	81743000000	2.44558	0.28376	2.98806	0.562281	Q60FE5;A0A087WWY3	Q60FE5;A0A087WWY3		FLNA
0.156397	0.179384	0.161694	0.466027	0.524766	0.676087	+		77	77	21	50.8	50.8	14.6	203.37	323.31	54507000000	31301000000	23206000000	2.7565	0.165825	1.90498	0.555626	H0Y2S9;H7C3G6;J3QL44	H0Y2S9		MPRIP
-0.160895	-0.110028	-0.164076	0.282499	1.00094	0.368154			12	12	12	47.9	47.9	47.9	28.024	172.92	10072000000	6531500000	3540800000	1.84554	-0.145	0.867375	0.55053	P62917;E9PKZ0;E9PKU4;G3V1A1;E9PP36	P62917;E9PKZ0;E9PKU4;G3V1A1;E9PP36	60S ribosomal protein L8	RPL8
0.0102069	0.175684	0.225152	0.507008	0.474774	0.663572			14	14	12	35.6	35.6	32.8	61.386	145.02	3893200000	2285200000	1608100000	0.770712	0.137014	1.95411	0.548451	J3QRU1;P07947;P12931;P12931-2;P06241-3;P06241-2;P06241;E5RFS5;Q5TGY6;Q573B4;P06239;P09769;P06239-3	J3QRU1;P07947	Non-specific protein-tyrosine kinase;Tyrosine-protein kinase Yes	YES1
1.01049	1.02616	1.20783	0.494467	0.54962	0.596554	+	+	20	20	20	39.1	39.1	39.1	81.307	149.27	1183300000	535640000	647620000	2.46707	1.0815	2.53798	0.54688	P33993;P33993-3;P33993-2;C9J8M6	P33993;P33993-3	DNA replication licensing factor MCM7	MCM7
1.03238	1.31394	0.762902	0.75369	0.478092	0.406537			7	7	7	8.5	8.5	8.5	119.52	26.303	243540000	107110000	136430000	1.64283	1.03641	1.44902	0.546106	O95373;E9PLJ0;E9PLB2;O15397-2;O15397	O95373	Importin-7	IPO7
NaN	NaN	NaN	NaN	NaN	0.54409			3	3	3	3.9	3.9	3.9	102.29	6.0783	47512000	25383000	22128000	0	NaN	0	0.54409	A0A0A0MRA8;Q9Y2J2-2;Q9Y2J2-4;Q9Y2J2;A0A0J9YY18;A8K968;J3QRQ6;J3KS70;J3QLU5;J3QKY2;J3KRD1;J3QKK4;J3QR33;J3QS55;A0A0J9YW31;Q9Y2J2-3	A0A0A0MRA8;Q9Y2J2-2;Q9Y2J2-4;Q9Y2J2;A0A0J9YY18;A8K968	Band 4.1-like protein 3;Band 4.1-like protein 3, N-terminally processed	EPB41L3
1.37139	1.45175	1.80099	0.5431	0.658463	0.42503	+		14	14	14	35.9	35.9	35.9	47.716	56.094	2903500000	1363200000	1540300000	2.1403	1.54138	1.82107	0.542197	P23526;P23526-2	P23526;P23526-2	Adenosylhomocysteinase	AHCY
0.492622	0.580917	0.574634	0.47633	0.577441	0.568713	+	+	17	17	13	76.2	76.2	61.9	32.922	323.31	46006000000	24774000000	21232000000	2.57357	0.549391	2.44876	0.540828	P52907	P52907	F-actin-capping protein subunit alpha-1	CAPZA1
-0.671278	-0.424571	-0.57336	NaN	NaN	0.539233			6	6	6	10.3	10.3	10.3	96.955	41.094	357100000	241530000	115570000	1.79015	-0.556403	0	0.539233	Q9BZF1-3;Q9BZF1-2;Q9BZF1;F8VUA7;F8VQX7	Q9BZF1-3;Q9BZF1-2;Q9BZF1;F8VUA7;F8VQX7	Oxysterol-binding protein-related protein 8;Oxysterol-binding protein	OSBPL8
1.36552	1.3058	0.958509	0.458067	0.612117	0.54666			13	9	9	63.8	49.1	49.1	33.496	202.43	5047100000	2794900000	2252200000	1.96574	1.20994	2.16814	0.538948	Q15366-7;Q15366-4;Q15366-8;Q15366-5;Q15366-6;Q15366-3;H3BRU6;F8VZX2;Q15366;Q15366-2;F8W0G4;F8VXH9;E9PFP8;P57721-5;P57721-4;P57721;F8W1G6;F8VRH0;J3QT27;P57721-2;P57721-3;H3BSS4;H3BND9	Q15366-7;Q15366-4;Q15366-8;Q15366-5;Q15366-6;Q15366-3;H3BRU6;F8VZX2;Q15366;Q15366-2	Poly(rC)-binding protein 2	PCBP2
NaN	-0.0595551	-0.220261	0.504061	0.553066	0.524465		+	4	4	4	48.2	48.2	48.2	6.6767	5.253	286160000	181010000	105160000	0.479008	-0.139908	3.1391	0.527197	P62273;A0A087WTT6;P62273-2	P62273;A0A087WTT6;P62273-2	40S ribosomal protein S29	RPS29
0.336398	0.636822	NaN	0.700617	0.547845	0.308477			11	11	11	16.3	16.3	16.3	71.496	11.045	225240000	110550000	114690000	0.719852	0.48661	1.34578	0.51898	Q15046-2;Q15046;H3BVA8;H3BMR9;J3KRL2;H3BPV7;H3BQK5	Q15046-2;Q15046	Lysine--tRNA ligase	KARS
-0.103937	-0.0191704	-0.134461	0.489337	0.707702	0.347892			7	7	7	25.5	25.5	25.5	40.251	121.65	10108000000	6454700000	3653600000	0.884377	-0.0858563	1.40998	0.514977	Q8NFJ5;F5GWG3	Q8NFJ5	Retinoic acid-induced protein 3	GPRC5A
0.29678	0.38659	0.168129	0.445727	0.562474	0.53446		+	43	2	2	98.9	4.8	4.8	41.736	87.081	51435000000	28903000000	22532000000	1.33311	0.283833	2.33253	0.51422	P60709;E7EVS6;G5E9R0;C9JZR7;C9JTX5;Q9BYX7	P60709	Actin, cytoplasmic 1;Actin, cytoplasmic 1, N-terminally processed	ACTB
NaN	1.2867	1.06219	0.156655	NaN	0.864969			3	3	3	8.7	8.7	8.7	56.025	44.572	391940000	156670000	235270000	1.21706	1.17445	0.413483	0.510812	Q96QD8;Q96QD8-2;F8VUY8	Q96QD8;Q96QD8-2	Sodium-coupled neutral amino acid transporter 2	SLC38A2
0.367595	0.326652	-0.198543	NaN	0.510253	NaN			15	15	15	30.6	30.6	30.6	61.705	72.782	3416700000	1975400000	1441300000	0.336918	0.165235	0	0.510253	E9PGZ1;E7EX44;Q05682-5;Q05682-3;Q05682-4;Q05682-6;Q05682-2;Q05682;C9J813;C9JEK3;C9JE79;F8WE61;REV__H0YH95;REV__H0YEF9;REV__E9PJZ7;REV__H0YHK3;REV__O75334-6;REV__O75334-5;REV__Q13136-2;REV__Q13136;REV__O75334-2;REV__O75334-4;REV__G3V200;REV__O75334-3;REV__O75334	E9PGZ1;E7EX44;Q05682-5;Q05682-3;Q05682-4;Q05682-6;Q05682-2;Q05682;C9J813	Caldesmon	CALD1
1.35744	1.32366	1.29143	0.520246	0.537445	0.466027	+	+	31	31	31	65.5	65.5	65.5	57.936	269.94	9006100000	3741800000	5264300000	3.68387	1.32417	2.74704	0.507906	P14618;P14618-3;P14618-2;B4DNK4;H3BTN5;H3BQ34;H3BR70;H3BUW1;H3BTJ2;H3BT25;H3BU13;H3BN34;H3BQZ3;P30613-2;P30613	P14618;P14618-3;P14618-2;B4DNK4;H3BTN5;H3BQ34;H3BR70	Pyruvate kinase PKM;Pyruvate kinase	PKM
0.227125	0.334339	0.170951	0.475189	0.517528	0.525969		+	43	43	0	98.9	98.9	0	41.792	323.31	3418000000000	1952200000000	1465800000000	1.43837	0.244138	3.01697	0.506228	P63261;I3L3I0;I3L1U9;I3L3R2;J3KT65;C9JUM1	P63261	Actin, cytoplasmic 2;Actin, cytoplasmic 2, N-terminally processed	ACTG1
0.032242	0.0117819	0.00345838	0.422556	0.582941	0.508632			12	6	6	71.7	44	44	18.736	73.434	2075200000	1303700000	771530000	0.687363	0.0158274	2.07961	0.50471	Q9Y281;Q9Y281-3;F8WDN3;G3V2U0	Q9Y281;Q9Y281-3	Cofilin-2	CFL2
-0.696938	NaN	NaN	0.269153	0.733701	NaN			5	5	5	4	4	4	168.59	9.2835	250080000	165890000	84193000	0	-0.696938	0.558832	0.501427	Q8TEQ6	Q8TEQ6	Gem-associated protein 5	GEMIN5
NaN	NaN	NaN	0.172487	NaN	0.826274			2	2	2	2	2	2	128.46	2.1438	3713500	1726700	1986800	0	NaN	0.432991	0.499381	O95239-2;O95239;Q2VIQ3	O95239-2;O95239;Q2VIQ3	Chromosome-associated kinesin KIF4A;Chromosome-associated kinesin KIF4B	KIF4A;KIF4B
0.206768	-0.0485614	0.0574155	0.519542	0.745366	0.229219			45	42	41	7.5	7.1	6.9	838.3	143.53	2531900000	1472000000	1059900000	0.362326	0.0718741	1.10018	0.498042	Q9UPN3;H3BPE1;H3BQK9;Q9UPN3-4;Q9UPN3-3;Q9UPN3-2;H0Y390;Q9UPN3-5;E9PLY5;E9PNZ4;H0Y314;H0YD69;H0Y6T5;H0Y4F5;E9PLY0;H0Y7I1;E9PS75	Q9UPN3;H3BPE1;H3BQK9;Q9UPN3-4;Q9UPN3-3;Q9UPN3-2;H0Y390;Q9UPN3-5	Microtubule-actin cross-linking factor 1, isoforms 1/2/3/5	MACF1
1.26015	1.10326	0.758559	0.443501	0.547351	0.4959		+	8	8	8	71.9	71.9	71.9	14.716	32.467	564870000	258920000	305950000	1.70623	1.04066	2.43896	0.495584	P09382;F8WEI7	P09382	Galectin-1	LGALS1
1.61744	1.74507	1.48342	0.831472	0.401521	0.249991	+		11	11	11	58.8	58.8	58.8	23.772	170.09	5420900000	1989900000	3431000000	2.66159	1.61531	0.97905	0.494328	O95816;O95816-2	O95816;O95816-2	BAG family molecular chaperone regulator 2	BAG2
-0.505062	-0.517379	-0.492139	0.531668	0.538637	0.41045	+		46	46	1	36.7	36.7	0.6	158.52	323.31	15198000000	10207000000	4991200000	3.68142	-0.50486	2.1528	0.493585	Q04637-5;Q04637-4;Q04637-3;Q04637;Q04637-9;Q04637-6;C9JF13;C9J6B6	Q04637-5;Q04637-4;Q04637-3;Q04637;Q04637-9;Q04637-6	Eukaryotic translation initiation factor 4 gamma 1	EIF4G1
0.302758	0.506703	0.655627	0.574441	0.277747	0.622274			17	17	17	11.1	11.1	11.1	215.74	43.113	704740000	339000000	365740000	1.38542	0.488363	1.34813	0.491487	A6NHR9-2;A6NHR9;J3KTL8;A6NHR9-3;J3KRK8	A6NHR9-2;A6NHR9;J3KTL8;A6NHR9-3	Structural maintenance of chromosomes flexible hinge domain-containing protein 1	SMCHD1
NaN	NaN	NaN	1.0125	0.148869	0.309875			4	4	4	9.9	9.9	9.9	72.721	9.8793	93056000	46705000	46351000	0	NaN	0.686966	0.490414	B4DN67;Q96J84;Q96J84-2;Q5W0G0;Q5W0F9;Q96J84-3	B4DN67;Q96J84;Q96J84-2	Kin of IRRE-like protein 1	KIRREL
-0.0484271	-0.0728773	0.0309717	0.467801	0.48944	0.50121		+	43	43	43	54.5	54.5	54.5	90.291	323.31	288070000000	176660000000	111410000000	0.358407	-0.0301109	3.39281	0.48615	Q9BUJ2-2;Q9BUJ2;A0A0A0MRA5;B7Z4B8;Q9BUJ2-4;Q9BUJ2-3;M0R3F1;M0QYZ0;M0QYI8;M0R0K8;M0QZV6;M0R203;M0QYM5;M0R247;A0A087X1I2;Q9BUJ2-5;M0QYG9	Q9BUJ2-2;Q9BUJ2;A0A0A0MRA5;B7Z4B8;Q9BUJ2-4;Q9BUJ2-3;M0R3F1;M0QYZ0	Heterogeneous nuclear ribonucleoprotein U-like protein 1	HNRNPUL1
0.343123	0.378955	0.385376	0.478506	NaN	NaN	+		16	16	13	46.6	46.6	40.6	40.282	220.2	13111000000	7048000000	6062600000	2.89769	0.369152	0	0.478506	Q12792;Q12792-3;Q12792-4;F8VS81;F8W1Q9;F8VRG3;F8W645;H7C5I2;Q9NR96-4	Q12792;Q12792-3;Q12792-4;F8VS81	Twinfilin-1	TWF1
1.04208	1.01221	0.960067	0.363564	0.559932	0.504773	+		21	21	6	38.6	38.6	13.5	66.217	175.43	6371800000	2807800000	3564000000	3.24534	1.00479	1.83116	0.47609	Q9NVI7-2;Q9NVI7;H0Y2W2;Q9NVI7-3;Q5SV16;Q5T9A4-2	Q9NVI7-2;Q9NVI7;H0Y2W2;Q9NVI7-3	ATPase family AAA domain-containing protein 3A	ATAD3A
2.53316	2.43712	2.50307	0.631896	0.473319	0.320658	+		19	19	19	25.1	25.1	25.1	111.98	94.286	2363000000	500080000	1862900000	3.8874	2.49112	1.46942	0.475291	G5EA31;P53992;P53992-2;A0A0U1RR49;O94855;O94855-2	G5EA31;P53992	Protein transport protein Sec24C	SEC24C
0.316841	0.641176	0.588133	0.439676	0.552869	0.417272			16	16	16	14.7	14.7	14.7	126.97	18.062	293230000	151280000	141950000	1.44432	0.515383	2.10344	0.469939	Q16531;F5GY55;F5GWI0;F5H2L3;F5GZY8;Q16531-2;F5GYG8	Q16531;F5GY55	DNA damage-binding protein 1	DDB1
0.265077	0.597412	0.163756	0.533264	0.370945	0.494979			10	10	10	2.8	2.8	2.8	468.83	31.758	299870000	168070000	131800000	0.918538	0.342082	1.96444	0.466396	P98160	P98160	Basement membrane-specific heparan sulfate proteoglycan core protein;Endorepellin;LG3 peptide	HSPG2
0.425459	0.378401	0.59827	0.41045	0.457332	0.515612		+	9	9	9	16.2	16.2	16.2	73.027	29.407	574430000	298690000	275740000	1.70232	0.467377	2.36424	0.461131	A0A087WTP3;Q92945;M0R0I5;M0QYH3;M0QXW7;M0R3J3;M0R251;M0QYG1;M0R263;M0R0C6;E9PEB5;Q96AE4;Q96AE4-2	A0A087WTP3;Q92945;M0R0I5	Far upstream element-binding protein 2	KHSRP
0.457016	0.704518	0.576861	0.387363	0.501414	0.481919		+	18	18	16	55.7	55.7	49.5	46.153	297.7	2793800000	1472100000	1321600000	1.82771	0.579465	2.2299	0.456898	P60842;J3KT12;P60842-2;J3QS69;J3KTB5;J3QL43;J3KSZ0;J3KTN0;J3QR64;E7EQG2;Q14240;Q14240-2;J3QLN6;J3KS25;J3QKZ9;J3KS93;J3KSN7;J3KT04;J3QQP0;E7EMV8	P60842;J3KT12;P60842-2;J3QS69;J3KTB5;J3QL43;J3KSZ0;J3KTN0	Eukaryotic initiation factor 4A-I	EIF4A1
0.598651	0.777872	0.826681	0.466653	0.504773	0.381394			14	14	14	27.8	27.8	27.8	82.285	87.968	1389300000	766180000	623130000	2.05588	0.734401	2.18854	0.45094	P33992;B1AHB1;B1AHB2;B1AHA9	P33992;B1AHB1	DNA replication licensing factor MCM5;DNA helicase	MCM5
0.0677764	0.122474	0.219339	0.447209	0.514804	0.383829			106	92	92	54.3	49.7	49.7	275.66	323.31	24853000000	13321000000	11532000000	1.04016	0.13653	2.153	0.448614	O75369-2;O75369-9;O75369;O75369-8;O75369-6;O75369-3;E7EN95;O75369-7;O75369-5;O75369-4;H7C5L4;A0A0A0MT44;A0A0C4DGA1	O75369-2;O75369-9;O75369;O75369-8;O75369-6;O75369-3;E7EN95;O75369-7;O75369-5;O75369-4	Filamin-B	FLNB
0.305795	0.267116	0.147176	0.397365	0.470094	0.469261		+	66	66	44	80.4	80.4	57.1	103.06	323.31	105390000000	60802000000	44586000000	1.42747	0.240029	2.53551	0.445573	P12814;P12814-3;P12814-2;P12814-4;H9KV75;G3V2N5;H0YJW3;P35609-2;P35609;H7C5W8;G3V2W4;H0YJ11;Q08043;A0A087WSZ2;F6THM6;G3V5M4;G3V2X9;G3V2E8;G3V380;D6RH00	P12814;P12814-3;P12814-2;P12814-4;H9KV75	Alpha-actinin-1	ACTN1
0.766977	0.86671	0.122341	0.445515	0.298306	0.587941			10	10	10	12.4	12.4	12.4	104.85	30.846	429120000	217870000	211250000	0.889938	0.585343	1.47244	0.443921	C9JZR2;O60716-5;O60716-3;O60716-2;O60716;O60716-21;O60716-19;O60716-18;O60716-17;O60716-13;O60716-11;O60716-10;O60716-8;O60716-9;O60716-7;O60716-6;O60716-4;O60716-24;O60716-23;O60716-22;O60716-20;O60716-16;O60716-15;O60716-14;O60716-12;O60716-29;O60716-27;O60716-26;O60716-25;O60716-32;O60716-31;O60716-30;O60716-28;E9PRE2;H0YC95;E9PKY0	C9JZR2;O60716-5;O60716-3;O60716-2;O60716;O60716-21;O60716-19;O60716-18;O60716-17;O60716-13;O60716-11;O60716-10;O60716-8;O60716-9;O60716-7;O60716-6;O60716-4;O60716-24;O60716-23;O60716-22;O60716-20;O60716-16;O60716-15;O60716-14;O60716-12;O60716-29;O60716-27;O60716-26;O60716-25;O60716-32;O60716-31;O60716-30;O60716-28	Catenin delta-1	CTNND1
0.450169	0.386149	0.450063	0.331476	0.688494	0.294077	+		6	6	6	11.7	11.7	11.7	83.267	38.833	376350000	195370000	180990000	2.60843	0.428793	1.13426	0.438015	Q12797-10;Q12797;E5RHJ2;E5RHK2;G3XAN5;E5RG29;A0A0A0MSK8;E5RG56;Q12797-7;Q12797-4;Q12797-3;Q12797-9;Q12797-6;Q12797-5;Q12797-8;Q12797-2	Q12797-10;Q12797	Aspartyl/asparaginyl beta-hydroxylase	ASPH
0.243303	-0.553638	-0.331736	0.537545	0.460271	0.295723			10	10	10	8.7	8.7	8.7	162.63	21.267	145420000	97526000	47892000	0.334829	-0.214023	1.58043	0.431179	Q14152-2;Q14152	Q14152-2;Q14152	Eukaryotic translation initiation factor 3 subunit A	EIF3A
NaN	3.82212	NaN	NaN	0.425459	NaN			4	4	4	5.6	5.6	5.6	99.045	20.3	49047000	6619900	42427000	0	3.82212	0	0.425459	P35606-2;P35606;D6RBZ7;D6RCL6;D6RBG7;D6RBT6;H0YAC7;D6R997	P35606-2;P35606	Coatomer subunit beta	COPB2
0.421048	0.345169	0.432746	NaN	0.53456	0.315334	+		14	14	14	46.1	46.1	46.1	41.329	138.87	4378200000	2415900000	1962300000	2.32931	0.399654	0.793959	0.424947	G5EA06;Q92552;Q92552-2;D6RH20;D6RJC7;E5RJ73	G5EA06;Q92552;Q92552-2;D6RH20	28S ribosomal protein S27, mitochondrial	MRPS27
2.1897	2.27671	2.1113	0.192952	0.504976	0.572987	+		12	12	12	54.3	54.3	54.3	31.703	121.85	3408200000	873970000	2534300000	3.3239	2.19257	1.16412	0.423638	J3QT28;O43684-2;O43684;J3QSX4	J3QT28;O43684-2;O43684;J3QSX4	Mitotic checkpoint protein BUB3	BUB3
2.53506	2.88557	2.90205	0.466549	0.577151	0.204266	+		13	13	13	42.2	42.2	42.2	44.205	42.653	4304400000	2304500000	1999900000	2.73145	2.77423	1.19417	0.415989	J3KNW4;A0A0A0MSG2;Q14192;F8WDA8;U3KQT4;Q14192-2;C9J3S8	J3KNW4;A0A0A0MSG2;Q14192	Four and a half LIM domains protein 2	FHL2
NaN	NaN	NaN	NaN	0.19862	0.625551			3	3	3	5.3	5.3	5.3	70.901	7.2168	12473000	5529100	6943700	0	NaN	0.516734	0.412085	B0QY89;Q9Y262;C9JHP4;C9K0Q7;B0QY90;Q9Y262-2;H7C3A0	B0QY89;Q9Y262;C9JHP4;C9K0Q7;B0QY90;Q9Y262-2	Eukaryotic translation initiation factor 3 subunit L	EIF3L
1.89119	1.5773	1.61273	0.413377	0.529071	0.284869	+		10	10	10	49.1	49.1	49.1	30.315	136.02	2577900000	808550000	1769400000	2.46644	1.69374	1.54581	0.409106	A0A0A0MRJ6;H7BY58;P22061;P22061-2;F6S8N6;C9J0F2;F8WDT3;F8WAV5;F8WAX2;H7C4X2	A0A0A0MRJ6;H7BY58;P22061;P22061-2;F6S8N6	Protein-L-isoaspartate O-methyltransferase;Protein-L-isoaspartate(D-aspartate) O-methyltransferase	PCMT1
0.537048	1.00727	0.971295	0.337311	0.395831	0.491391			7	7	7	25.6	25.6	25.6	34.081	17.74	1164800000	587570000	577230000	1.50905	0.838537	1.9249	0.408178	A0A024QZP7;P06493;E5RIU6;A0A087WZZ9;P06493-2;K7ELV5;E7ESI2;G3V5T9;P24941-2;P24941;Q00526;G3V317;F8VXD2;F8VYH9;F8VZZ0;F8VTV8;F8VWX7;F8VZ51;K7EJ83;H0YAZ9;Q9BVE2;E7EUK8;E5RGN0;A0A087X209;A0A087WZU2;F5H6Z0;J3QSD7;P11802-2;Q00535-2;Q00535;P11802;Q00534;Q96Q40-2;P50750;Q96Q40-4;Q96Q40-3;O94921-3;Q96Q40-5;Q96Q40;O94921-2;O94921;Q07002;Q07002-2;P50750-2;Q00536;Q00536-3;Q07002-3;Q00537-2;Q00537;Q00536-2;Q…	A0A024QZP7;P06493;E5RIU6;A0A087WZZ9;P06493-2	Cyclin-dependent kinase 1	CDC2;CDK1
-0.0917712	-0.0618271	-0.0667899	0.497127	0.391988	0.331247			19	19	19	23.4	23.4	23.4	104.55	121.46	1445800000	873700000	572080000	1.8086	-0.0734628	1.8572	0.406787	P63010;P63010-2;A0A087X253;P63010-3;A0A087WU93;A0A087WZQ6;A0A087WYD1;C9J1E7;Q10567-4;Q10567-3;Q10567-2;Q10567;K7EN71;K7ERB2;K7EJX1;K7EJ01;A0A087WXS3;K7EKZ5;H7C034	P63010;P63010-2;A0A087X253;P63010-3;A0A087WU93;A0A087WZQ6;A0A087WYD1	AP-2 complex subunit beta	AP2B1
2.52341	2.61873	2.64057	0.378179	0.482745	0.355355	+		24	24	24	83.7	83.7	83.7	32.004	312.94	57318000000	12989000000	44329000000	3.71624	2.59424	2.03492	0.405426	Q96HS1;Q96HS1-2;F5GXG4	Q96HS1;Q96HS1-2	Serine/threonine-protein phosphatase PGAM5, mitochondrial	PGAM5
0.158725	0.310107	0.190931	0.466131	0.465295	0.282143			48	48	45	38	38	36.6	189.25	323.31	7844600000	4432700000	3411900000	1.3857	0.219921	1.65512	0.404523	P46940;A0A0J9YXZ5;H0YLE8;A0A087WWP1;H0YKA5;A0A087X225;E9PDT6	P46940;A0A0J9YXZ5;H0YLE8	Ras GTPase-activating-like protein IQGAP1	IQGAP1
1.30819	NaN	1.28806	0.38416	0.474358	0.345737	+		11	11	11	23.9	23.9	23.9	72.691	74.401	379440000	150640000	228800000	2.30678	1.29812	2.05073	0.401418	P31040;D6RFM5;P31040-2;A0A087X1I3;P31040-3;H0Y8X1	P31040;D6RFM5;P31040-2;A0A087X1I3;P31040-3	Succinate dehydrogenase [ubiquinone] flavoprotein subunit, mitochondrial	SDHA
-0.436627	-0.257442	-0.249153	NaN	NaN	0.399882			5	5	5	18.3	18.3	18.3	40.542	28.661	381720000	246470000	135260000	1.44593	-0.314407	0	0.399882	Q9Y295	Q9Y295	Developmentally-regulated GTP-binding protein 1	DRG1
2.65244	2.50894	2.76653	0.362554	0.560519	0.27262	+		20	20	20	19.9	19.9	19.9	138.34	46.169	715080000	155290000	559790000	3.10001	2.64264	1.37026	0.398565	P53621;P53621-2	P53621;P53621-2	Coatomer subunit alpha;Xenin;Proxenin	COPA
-0.169696	-0.130113	-0.471769	0.304861	0.640251	0.247077			18	18	18	17.4	17.4	17.4	134.55	89.466	4271700000	2178700000	2093000000	0.853975	-0.257193	1.07884	0.397396	Q92896;Q92896-3;Q92896-2;H3BM42;H3BQU9;H3BQT1;H3BRD8	Q92896;Q92896-3;Q92896-2;H3BM42	Golgi apparatus protein 1	GLG1
-0.405795	-0.468571	-0.493276	0.361656	0.438293	0.391988	+	+	40	40	12	65.6	65.6	28.8	70.67	323.31	140080000000	95789000000	44287000000	2.48859	-0.455881	2.50437	0.397312	P11940;E7EQV3;E7ERJ7;P11940-2;A0A087WTT1;H0YAR2;H0YBN4;H0YB86;H0YB75;E5RJB9;H0YAP2;H0YAS6;E5RGH3;E5RH24;H0YAS7;Q4VXU2;E5RHG7;H0YAW6;Q4VXU2-2;H0YC10;E5RGC4;E5RFD8;Q96DU9-2;Q96DU9;E5RJM8	P11940;E7EQV3;E7ERJ7;P11940-2;A0A087WTT1	Polyadenylate-binding protein 1;Polyadenylate-binding protein	PABPC1
-0.359472	-0.103193	-0.204582	0.458487	0.304628	0.419647			20	20	20	49.5	49.5	49.5	55.399	156.5	2515100000	1511500000	1003600000	1.01635	-0.222416	1.87121	0.394254	Q9UHX1-6;Q9UHX1-5;A0A0J9YYL3;A0A0J9YXJ8;A0A0J9YVP6;A0A0J9YXX5;Q9UHX1-4;Q9UHX1-3;Q9UHX1-2;Q9UHX1;A0A0J9YVR6;E9PQ56;A0A0J9YWM1;H0YEM1;E9PN18;E9PMU7;E9PL19;H0YCP8	Q9UHX1-6;Q9UHX1-5;A0A0J9YYL3;A0A0J9YXJ8;A0A0J9YVP6;A0A0J9YXX5;Q9UHX1-4;Q9UHX1-3;Q9UHX1-2;Q9UHX1;A0A0J9YVR6;E9PQ56;A0A0J9YWM1;H0YEM1	Poly(U)-binding-splicing factor PUF60	PUF60
-0.477382	-0.432883	-0.364515	0.53824	0.343692	0.289362	+		19	19	19	26.5	26.5	26.5	113.15	199.03	3112900000	2030000000	1082900000	2.22812	-0.424927	1.45021	0.390432	Q9H2U1-2;Q9H2U1;Q9H2U1-3;E7EWK3;A0A0G2JQU7;A0A0G2JRP3;H7C5F5;H7C514;Q6P158-2;Q6P158	Q9H2U1-2;Q9H2U1;Q9H2U1-3;E7EWK3	ATP-dependent RNA helicase DHX36	DHX36
0.980537	1.05415	1.01728	0.171591	0.601887	0.378512	+		22	22	22	68.2	68.2	68.2	47.371	260.79	23441000000	10496000000	12946000000	3.36043	1.01732	1.0425	0.383996	P61158;B4DXW1;F8WDR7;Q9P1U1-2;Q9P1U1;Q9P1U1-3;A0A0A0MTI9;H7C4J1;C9IZN3;Q9C0K3;F8WEW2;F8WE84	P61158;B4DXW1	Actin-related protein 3	ACTR3
1.2199	1.49467	1.30638	0.407625	0.361207	0.364909	+	+	22	22	22	33.3	33.3	33.3	84.87	83.607	744150000	316180000	427970000	2.43859	1.34032	2.80977	0.377913	P02786;G3V0E5;H7C3V5;F8WBE5	P02786;G3V0E5	Transferrin receptor protein 1;Transferrin receptor protein 1, serum form	TFRC
NaN	-0.183851	0.0270125	0.304277	0.385265	0.405448			18	18	18	14.6	14.6	14.6	174.76	32.247	151440000	92337000	59102000	0.227039	-0.0784192	2.14892	0.364997	P35573;P35573-2;P35573-3	P35573;P35573-2;P35573-3	Glycogen debranching enzyme;4-alpha-glucanotransferase;Amylo-alpha-1,6-glucosidase	AGL
NaN	NaN	-0.577573	0.572599	NaN	0.157044			7	5	4	14.3	11.9	9.1	74.222	13.853	101060000	64162000	36898000	0	-0.577573	0.482029	0.364821	P51116;I3L1Z2;A0A087WY29	P51116	Fragile X mental retardation syndrome-related protein 2	FXR2
1.01078	0.499068	0.515107	0.56589	0.255682	0.263635			11	9	9	40.4	37.3	37.3	29.174	101.18	720650000	301700000	418950000	1.24638	0.674985	1.14716	0.361736	P62258;P62258-2;K7EM20;B4DJF2;I3L3T1;K7EIT4;I3L0W5	P62258;P62258-2	14-3-3 protein epsilon	YWHAE
0.191815	0.215492	0.0880058	0.430178	0.441058	0.207768			24	24	23	75.6	75.6	75.6	39.594	323.31	57256000000	34228000000	23028000000	1.28491	0.165104	1.37798	0.359668	Q9NYL9;H0YNJ8;H0YKU1;H0YNU8;G5EA42;Q9NZR1	Q9NYL9;H0YNJ8;H0YKU1	Tropomodulin-3	TMOD3
-0.205264	-0.260048	-0.191673	0.353549	0.418028	0.305212			138	138	19	22	22	3.4	860.65	323.31	14175000000	8868300000	5306400000	2.04653	-0.218995	2.08686	0.35893	Q03001;F8W9J4;E9PHM6;E7ERU0;Q03001-8;Q03001-9;A0A0U1RQJ2;Q6P0N6;Q03001-3;Q03001-13;H0YC82;Q03001-10;H0YAT7;H0YBX0;E7ESK0;E7ERX3;REV__Q9BX97	Q03001;F8W9J4;E9PHM6;E7ERU0;Q03001-8	Dystonin	DST
-0.229551	-0.227945	0.274172	0.294547	0.522357	0.257976			10	10	10	16.5	16.5	16.5	101.43	46.648	597370000	382540000	214830000	0.124705	-0.0611082	1.3065	0.358293	Q7Z2W4;C9J6P4;Q7Z2W4-2;Q7Z2W4-3;Q7Z2W4-4;H7C5K1;Q7Z2W4-5	Q7Z2W4;C9J6P4;Q7Z2W4-2;Q7Z2W4-3	Zinc finger CCCH-type antiviral protein 1	ZC3HAV1
0.634221	0.675184	0.280956	0.158466	0.51167	0.389677			7	7	7	24.3	24.3	24.3	47.837	63.638	701050000	373770000	327280000	1.28851	0.53012	1.11773	0.353271	Q15084-3;Q15084;Q15084-4;Q15084-5;Q15084-2	Q15084-3;Q15084;Q15084-4;Q15084-5;Q15084-2	Protein disulfide-isomerase A6	PDIA6
NaN	NaN	-0.598479	0.348459	NaN	NaN			2	2	2	2.2	2.2	2.2	113.63	3.0648	53778000	35175000	18602000	0	-0.598479	0	0.348459	F8W726;Q14157-4;Q14157-1;Q14157-3;Q14157;Q14157-5;Q5VU77;H0Y5H6;H7C2T8	F8W726;Q14157-4;Q14157-1;Q14157-3;Q14157;Q14157-5;Q5VU77;H0Y5H6;H7C2T8	Ubiquitin-associated protein 2-like	UBAP2L
-0.0782438	-0.287272	-0.287378	0.234011	0.293488	0.499272			27	27	27	47.1	47.1	47.1	81.12	186.01	5323600000	3400000000	1923600000	1.0503	-0.217631	1.29281	0.342257	O14639-2;O14639-6;O14639;F8W8M4;A0A0A0MRL6;O14639-3;O14639-5;O14639-4;J3QSX6;H0Y7N6;F6XFR5	O14639-2;O14639-6;O14639;F8W8M4;A0A0A0MRL6;O14639-3;O14639-5;O14639-4;J3QSX6	Actin-binding LIM protein 1	ABLIM1
0.257011	0.219835	0.296193	0.695905	-0.0118061	NaN	+		8	8	7	52	52	48.9	38.028	115.85	2154400000	1300600000	853870000	2.14026	0.257679	0.29175	0.342049	F8VV59;F5H4R6;H0YIV4;P55209-2;P55209;F8W118;F8VY35;F8W543;B7Z9C2;F8W0J6;H0YH88;H0YHC3;P55209-3;F8W020;F8VUX1;F8VRJ2;F8VXI6;F8VVB5;B7Z4K9;E9PNW0;E9PJJ2;E9PS34;E9PNJ7;A8MXH2;E9PKT8;C9J6D1;C9JZI7	F8VV59;F5H4R6;H0YIV4;P55209-2;P55209;F8W118;F8VY35;F8W543;B7Z9C2;F8W0J6;H0YH88;H0YHC3;P55209-3;F8W020;F8VUX1;F8VRJ2;F8VXI6	Nucleosome assembly protein 1-like 1	NAP1L1
NaN	NaN	1.06716	0.339707	NaN	NaN			3	3	3	10.2	10.2	10.2	36.501	5.429	137820000	56123000	81701000	0	1.06716	0	0.339707	Q13347;Q5TFK1	Q13347	Eukaryotic translation initiation factor 3 subunit I	EIF3I
-0.607331	-0.407364	-0.487743	0.369718	0.349818	0.273337			15	15	15	28.2	28.2	28.2	87.133	120.24	2583500000	1812900000	770640000	1.87974	-0.500812	2.10861	0.330958	Q14694;Q14694-3;Q14694-2;J3KT19;H3BQC6;H3BQP1;H3BNA1;H3BNS8;H3BVF1	Q14694;Q14694-3;Q14694-2	Ubiquitin carboxyl-terminal hydrolase 10	USP10
2.42841	2.52614	2.37993	0.389347	0.300299	0.299596	+		15	15	11	74.2	74.2	61	37.497	241.94	17580000000	4319400000	13261000000	3.50976	2.44483	2.0932	0.329747	Q15365;F8VTZ0;H3BSP4;C9K0A2;F8WC71;C9IZV9;C9J7A9;C9JSA6;C9J5V4;C9JTY5;C9JZY3;C9J0A4;F6TJN8;P57723-2;P57723	Q15365	Poly(rC)-binding protein 1	PCBP1
0.203013	0.103934	0.0892269	0.36087	0.312781	0.304277		+	68	33	0	70.5	35	0	118.1	323.31	29261000000	16557000000	12704000000	1.18021	0.132058	2.53632	0.325976	Q6WCQ1-2;Q6WCQ1-3;J3KSW8	Q6WCQ1-2;Q6WCQ1-3;J3KSW8	Myosin phosphatase Rho-interacting protein	MPRIP
-0.480639	-0.191195	-0.199902	0.445515	0.362217	0.168129			17	17	11	10.2	10.2	6.3	245.44	74.859	1863600000	1137500000	726050000	1.03419	-0.290579	1.23437	0.325287	E7EVA0;P27816-6;P27816;P27816-2;P27816-4;H0Y2V1;B5MEG9;F8W9U4;A0A0J9YVV8;A0A0J9YW37;H7C456;P27816-7	E7EVA0;P27816-6;P27816;P27816-2	Microtubule-associated protein;Microtubule-associated protein 4	MAP4
0.408929	0.488104	0.559247	0.603692	0.236584	0.115832			14	14	14	45.9	45.9	45.9	33.249	38.677	3728900000	2037900000	1690900000	2.10217	0.485427	0.790698	0.318703	Q9Y399;Q5T8A0	Q9Y399;Q5T8A0	28S ribosomal protein S2, mitochondrial	MRPS2
-0.027572	-0.0228593	-0.0872428	0.279768	0.288418	0.381394			48	48	47	43.2	43.2	42.2	115.28	323.31	57217000000	32011000000	25206000000	0.803638	-0.0458914	1.98308	0.316527	O14974;O14974-4;O14974-3;O14974-5;O14974-2;F8VZN8;H0YHI8;H0YIS4;H0YIM2;A0A0U1RQZ1;H0YIS3;H0YHL8;F8VW28;H0YIL7;E1CKY7;O60237-4	O14974;O14974-4;O14974-3;O14974-5;O14974-2;F8VZN8	Protein phosphatase 1 regulatory subunit 12A	PPP1R12A
-0.807705	-0.829767	-0.807932	0.365021	0.303342	0.277152	+		50	50	50	52.3	52.3	52.3	123.03	323.31	20189000000	12782000000	7407000000	4.0939	-0.815135	2.17003	0.315171	Q92900-2;Q92900	Q92900-2;Q92900	Regulator of nonsense transcripts 1	UPF1
-1.81955	1.10064	1.24811	NaN	0.648557	-0.0437203			9	9	5	58.6	58.6	29.8	20.697	146.58	882200000	801900000	80305000	0.0574523	0.176401	0.26532	0.302419	P84077;P61204;F5H423;P61204-2;F5H0C7;F5H1V1;F5H6T5;F8WDB3;H0YGG7	P84077;P61204;F5H423;P61204-2	ADP-ribosylation factor 1;ADP-ribosylation factor 3	ARF1;ARF3
1.17326	0.992841	1.13245	0.242816	0.2929	0.370722	+		3	3	3	6.7	6.7	6.7	54.157	18.273	541970000	228050000	313920000	2.60927	1.09951	1.82882	0.302146	Q9Y285-2;Q9Y285;K7EK06;K7ER16;K7ER00;K7EPH2	Q9Y285-2;Q9Y285;K7EK06;K7ER16;K7ER00	Phenylalanine--tRNA ligase alpha subunit	FARSA
-0.510909	-0.584696	-0.531844	0.320542	0.329296	0.244522	+		35	23	22	48.5	31.7	30.3	69.578	323.31	31786000000	22138000000	9648300000	2.78679	-0.542483	2.09397	0.29812	Q13310-2;Q13310-3;B1ANR0;Q13310;H0Y5F5;H0YEU6;H0YCC8;H0YEQ8;B1ANR1;H0Y6X6;H0YER0;P0CB38	Q13310-2;Q13310-3;B1ANR0;Q13310;H0Y5F5	Polyadenylate-binding protein 4;Polyadenylate-binding protein	PABPC4
0.174662	0.0712136	0.153676	0.10017	0.440846	0.353097			14	1	1	28.2	4.8	4.8	42.003	3.5426	8937000000	4651900000	4285100000	1.28515	0.133184	0.999587	0.298038	Q562R1	Q562R1	Beta-actin-like protein 2	ACTBL2
NaN	1.52266	NaN	0.155879	0.434134	NaN			6	6	6	10.3	10.3	10.3	96.557	42.288	276200000	117640000	158550000	0	1.52266	0.551998	0.295007	P33991;E5RG31;E5RFJ8	P33991	DNA replication licensing factor MCM4	MCM4
0.192447	0.274172	0.131985	0.121811	0.355129	0.368936			25	3	3	44	9	9	42.019	63.306	234110000000	132370000000	101740000000	1.39701	0.199534	1.14144	0.281959	P68032;P63267;P68133;P62736;A6NL76;P63267-2;F8WB63;B8ZZJ2;C9JFL5;F6UVQ4;F6QUT6;F8WCH0	P68032;P63267;P68133;P62736;A6NL76;P63267-2	Actin, alpha cardiac muscle 1;Actin, gamma-enteric smooth muscle;Actin, alpha skeletal muscle;Actin, aortic smooth muscle	ACTC1;ACTG2;ACTA1;ACTA2
0.543001	0.439357	0.494467	0.0368901	0.62293	0.170181	+		3	3	1	38.1	38.1	13.1	9.461	10.41	2242900000	1229700000	1013200000	2.43433	0.492275	0.586479	0.276667	P42677;Q5T4L4;C9J1C5	P42677;Q5T4L4	40S ribosomal protein S27	RPS27
NaN	1.13757	0.744506	NaN	NaN	0.275961			5	5	5	30.1	30.1	30.1	18.72	14.16	227040000	109250000	117800000	0.882492	0.941037	0	0.275961	E5RJR5;P63208;E7ERH2;F8W8N3;P63208-2;E5RGM3	E5RJR5;P63208;E7ERH2;F8W8N3;P63208-2	S-phase kinase-associated protein 1	SKP1
0.494467	0.413919	0.427392	0.306729	0.307195	0.194717	+		17	17	16	31.2	31.2	29.9	81.312	78.511	2203500000	1151400000	1052100000	2.50653	0.445259	1.72751	0.269547	Q99661;Q99661-2;Q5JR89;Q5JR91;H0Y5Z9;Q8N4N8	Q99661;Q99661-2	Kinesin-like protein KIF2C	KIF2C
-0.169858	-0.217927	-0.140778	0.273098	0.337083	0.192321			21	21	13	28	28	17.4	105.36	134.9	1683800000	904160000	779670000	1.79825	-0.176188	1.6262	0.267501	O95782-2;O95782;O94973-3;A0A0G2JQM1;E9PR62;M0R2D9;E9PNC4;A0A0G2JRS3;A0A0G2JS17;A0A0G2JQT9;H0YEG0;H0YDE9;A0A0G2JRF9;A0A0G2JQA4	O95782-2;O95782	AP-2 complex subunit alpha-1	AP2A1
-0.411023	-0.461839	-0.463967	0.260026	0.285225	0.249142	+	+	39	39	39	43.8	43.8	43.8	123.51	323.31	17063000000	11416000000	5647600000	2.82258	-0.44561	2.78926	0.264797	Q6PKG0;Q6PKG0-3;A0A0B4J210;E5RH50;H0YBW1;H0YC33;H0YC73;H0YAN4;Q659C4-7;Q659C4-6;Q659C4-5;Q659C4-2;Q659C4;E5RHK4;Q659C4-9;H0YBR8	Q6PKG0;Q6PKG0-3;A0A0B4J210;E5RH50	La-related protein 1	LARP1
-0.22852	-0.269356	-0.190931	0.267835	0.375846	0.138028			14	14	14	62	62	62	18.431	49.936	18375000000	12079000000	6296100000	2.01827	-0.229602	1.20001	0.26057	P62280;M0QZC5;M0R1H5;M0R1H6	P62280;M0QZC5	40S ribosomal protein S11	RPS11
-1.16683	-1.67273	-1.75789	0.316146	0.171719	0.293724			17	17	6	29.9	29.9	14.2	82.525	229.68	2627000000	1959300000	667750000	1.84824	-1.53248	1.54654	0.26053	A0A0A0MS51;A0A0A0MT01;P06396-2;P06396-4;P06396-3;P06396;Q5T0I0;Q5T0I1;A0A0U1RQL8;Q5T0H8	A0A0A0MS51;A0A0A0MT01;P06396-2;P06396-4;P06396-3;P06396	Gelsolin	GSN
-0.270504	-0.23545	-0.336154	0.102994	0.335369	0.338111			12	12	11	20.7	20.7	19.8	80.467	79.971	3304900000	2175000000	1129900000	1.96355	-0.280703	1.09736	0.258824	Q71RC2-3;Q71RC2;Q71RC2-4;Q71RC2-5;Q71RC2-2;Q71RC2-6;X6RLN4;Q96J85;Q71RC2-7;Q6P4E2;Q8TBL5;A0A087WTL9;F8W1I4;F8VY40	Q71RC2-3;Q71RC2;Q71RC2-4;Q71RC2-5;Q71RC2-2;Q71RC2-6;X6RLN4;Q96J85;Q71RC2-7;Q6P4E2	La-related protein 4	LARP4
-0.717548	-0.632785	-0.367676	0.606537	-0.181248	0.333309			7	7	7	41.4	41.4	41.4	17.04	22.255	1667300000	1145700000	521630000	1.49172	-0.57267	0.411383	0.252866	P62841;K7EM56;A0A0B4J2B4;S4R417;K7EQJ5;K7ELC2;K7EJ78;S4R456	P62841;K7EM56;A0A0B4J2B4;S4R417;K7EQJ5;K7ELC2;K7EJ78	40S ribosomal protein S15	RPS15
-0.121204	-0.0765085	-0.0388509	0.151989	0.352646	0.244522			32	32	32	56.9	56.9	56.9	82.999	323.31	15652000000	9690100000	5962400000	1.09532	-0.0788545	1.3018	0.249719	P40939;H0YFD6;P40939-2	P40939	Trifunctional enzyme subunit alpha, mitochondrial;Long-chain enoyl-CoA hydratase;Long chain 3-hydroxyacyl-CoA dehydrogenase	HADHA
NaN	NaN	NaN	-0.488249	0.681044	0.554736			16	2	2	22.3	5.3	5.3	88.381	7.6866	38758000	13662000	25096000	0	NaN	0.243713	0.249177	A0A0B4J269;Q13509;Q13509-2;G3V2A3	A0A0B4J269;Q13509;Q13509-2	Tubulin beta-3 chain	TUBB3
0.777451	0.528571	0.9115	0.0915306	0.367595	0.287591			6	6	6	20	20	20	44.739	57.529	892760000	398890000	493880000	1.65231	0.739174	1.02889	0.248905	Q13148;A0A087WX29;B1AKP7;G3V162;A0A087X260;A0A087WYY0;A0A087WXQ5;K7EJM5;A0A087WV68;K7EN94;Q13148-4;A0A087WW61;A0A087WX67;A0A087WXV3;A0A087WZC9;A0A087WTZ4;K7EL26;K7EJ99;A0A0A0MSV7;A0A087WYE7	Q13148;A0A087WX29;B1AKP7;G3V162;A0A087X260;A0A087WYY0;A0A087WXQ5;K7EJM5;A0A087WV68;K7EN94;Q13148-4;A0A087WW61;A0A087WX67;A0A087WXV3	TAR DNA-binding protein 43	TARDBP
-0.236079	-0.256373	-0.168123	0.269392	0.300885	0.167229			17	17	17	54.6	54.6	54.6	22.591	42.563	34186000000	22468000000	11718000000	1.8425	-0.220191	1.58692	0.245836	A0A024R4M0;P46781;B5MCT8;C9JM19;F2Z3C0;A8MXK4	A0A024R4M0;P46781;B5MCT8;C9JM19	40S ribosomal protein S9	RPS9
-0.450873	-0.398703	-0.348354	0.173639	0.253868	0.286763	+		43	42	42	73.3	73.3	73.3	70.839	323.31	89306000000	59635000000	29672000000	2.2637	-0.39931	1.71366	0.23809	A0A0D9SFB3;A0A0D9SG12;A0A0D9SF53;O00571;O00571-2;O15523-2;O15523;O15523-3;A0A0J9YVQ7;A0A087WVZ1;A0A0J9YYH6;C9J081;B4DLA0;C9J8G5;A0A087WX09;D6RCM4;Q9NQI0-3;Q9NQI0-2;Q9NQI0-4;Q9NQI0;H0Y960	A0A0D9SFB3;A0A0D9SG12;A0A0D9SF53;O00571;O00571-2;O15523-2;O15523	ATP-dependent RNA helicase DDX3X;ATP-dependent RNA helicase DDX3Y	DDX3X;DDX3Y
-0.815936	-0.839028	-1.06637	0.118758	0.351628	0.236952			18	18	18	24.5	24.5	24.5	102.89	82.126	4440200000	3171200000	1269000000	2.11517	-0.90711	1.13931	0.23578	Q8WWM7-6;Q8WWM7-8;Q8WWM7-5;Q8WWM7-4;Q8WWM7-9;Q8WWM7-2;Q8WWM7;Q8WWM7-3;H3BUF6;H3BSK9;Q8WWM7-7;H3BSQ5;H3BUE3;H3BRB0;A0A0C4DGL7	Q8WWM7-6;Q8WWM7-8;Q8WWM7-5;Q8WWM7-4;Q8WWM7-9;Q8WWM7-2;Q8WWM7;Q8WWM7-3;H3BUF6	Ataxin-2-like protein	ATXN2L
-0.0645101	-0.0814611	0.0192037	0.237564	0.329755	0.139601			29	29	29	64.8	64.8	64.8	48.879	255.77	13444000000	8140000000	5304000000	0.512322	-0.0422558	1.29905	0.23564	P55084-2;P55084;F5GZQ3;B5MD38;C9JEY0;C9JE81;C9K0M0	P55084-2;P55084;F5GZQ3;B5MD38	Trifunctional enzyme subunit beta, mitochondrial;3-ketoacyl-CoA thiolase	HADHB
-0.171433	-0.125415	-0.0341012	0.269871	0.259062	0.160275			60	60	60	62	62	62	136.11	323.31	27197000000	15271000000	11927000000	0.951464	-0.110317	1.65224	0.229736	Q7L2E3-2;H7BXY3;Q7L2E3-3;Q7L2E3	Q7L2E3-2;H7BXY3;Q7L2E3-3;Q7L2E3	Putative ATP-dependent RNA helicase DHX30	DHX30
0.0709388	-0.036807	0.189413	0.372729	0.378512	-0.0700121			13	13	13	34.9	34.9	34.9	54.843	77.578	3673800000	2222900000	1450900000	0.429216	0.0745151	0.575173	0.227076	O43148;O43148-2;K7EP06;K7ERH6;K7EPP5	O43148;O43148-2;K7EP06	mRNA cap guanine-N7 methyltransferase	RNMT
-0.549958	-0.610125	-0.456286	0.211386	0.220701	0.248292	+	+	43	43	43	60.7	60.7	60.7	82.431	323.31	29980000000	17502000000	12478000000	2.16554	-0.53879	2.62368	0.226793	Q92499;F1T0B3;A0A087X2G1;Q92499-3;Q92499-2	Q92499;F1T0B3;A0A087X2G1;Q92499-3;Q92499-2	ATP-dependent RNA helicase DDX1	DDX1
-0.364515	-0.32916	-0.271287	0.249749	0.206893	0.215865	+	+	12	12	12	69.8	69.8	69.8	21.863	232.65	11689000000	7863300000	3825300000	2.15112	-0.321654	2.47217	0.224169	P32969;H0Y9V9;D6RAN4;E7ESE0;H0Y9R4	P32969;H0Y9V9;D6RAN4;E7ESE0;H0Y9R4	60S ribosomal protein L9	RPL9
1.10084	1.11217	1.08835	0.292193	0.303459	0.0694271	+		8	8	8	47.1	47.1	47.1	28.768	66.512	689830000	319100000	370720000	4.40807	1.10045	0.99727	0.221693	P12004	P12004	Proliferating cell nuclear antigen	PCNA
-0.330157	-0.649118	-0.763048	0.241962	0.277866	0.144438			11	10	10	53.9	49.7	49.7	18.898	26.854	539460000	363100000	176360000	1.33415	-0.580774	1.50981	0.221422	P46783;F6U211;S4R435;Q9NQ39	P46783;F6U211;S4R435;Q9NQ39	40S ribosomal protein S10;Putative 40S ribosomal protein S10-like	RPS10;RPS10-NUDT3;RPS10P5
0.0650208	0.0156403	-0.0198577	0.164658	0.236462	0.262433			8	8	8	70.5	70.5	70.5	14.515	136.94	13839000000	8919000000	4920300000	0.30383	0.0202678	1.76874	0.221184	P25398	P25398	40S ribosomal protein S12	RPS12
1.36446	1.26879	1.28108	0.120485	0.171463	0.368824	+		7	7	7	26.8	26.8	26.8	31.629	18.487	638050000	256940000	381110000	3.27568	1.30478	0.997091	0.220257	P21912;A0A087WXX8;A0A087WWT1	P21912;A0A087WXX8;A0A087WWT1	Succinate dehydrogenase [ubiquinone] iron-sulfur subunit, mitochondrial	SDHB
0.746141	0.822445	0.788435	0.125783	0.279887	0.252779	+		19	19	10	56.1	56.1	32.5	50.184	231.8	55543000000	26369000000	29174000000	3.10338	0.785673	1.35871	0.219483	Q5VTE0;P68104;A0A087WVQ9;P68104-2;A0A087WV01;Q5JR01;A6PW80	Q5VTE0;P68104;A0A087WVQ9;P68104-2;A0A087WV01	Putative elongation factor 1-alpha-like 3;Elongation factor 1-alpha 1;Elongation factor 1-alpha	EEF1A1P5;EEF1A1
-0.0339387	0.00719549	-0.240111	0.288181	0.111432	0.258217			5	5	5	44.2	44.2	44.2	11.168	14.134	3167900000	1929800000	1238100000	0.437778	-0.0889515	1.24569	0.219277	K7ERI7;P35268;K7EP65;K7EKS7;K7ELC4;K7EMH1;K7EJT5	K7ERI7;P35268;K7EP65;K7EKS7;K7ELC4;K7EMH1;K7EJT5	60S ribosomal protein L22	RPL22
0.164658	0.130667	0.217231	NaN	NaN	0.218843			11	11	11	47.5	47.5	47.5	47.27	140.05	3394000000	1949200000	1444800000	1.67701	0.170852	0	0.218843	H0Y8R1;F5H5I6;H0YAK1;Q12849;Q12849-5;H0YAM1	H0Y8R1;F5H5I6;H0YAK1;Q12849;Q12849-5	G-rich sequence factor 1	GRSF1
1.04872	0.930851	0.945982	0.243669	0.18409	0.227741	+		25	24	23	45.4	44	42.7	66.408	104.1	1044300000	475360000	568950000	2.84205	0.975186	2.18193	0.2185	P20700;E9PBF6;A0A0D9SFE5;A0A0D9SFY5	P20700;E9PBF6;A0A0D9SFE5	Lamin-B1	LMNB1
0.232661	0.0959919	0.205017	0.231187	0.1995	0.222928		+	61	61	0	42.4	42.4	0	186.18	323.31	29625000000	16634000000	12991000000	1.29377	0.17789	2.72308	0.217871	F8WD26	F8WD26		LMO7
-0.127542	-0.0746993	-0.220934	0.00733906	0.332393	0.296193			4	4	4	35.1	35.1	35.1	15.197	15.307	1255200000	821680000	433510000	1.09221	-0.141058	0.75585	0.211975	E7ETK0;A0A087WUS0;P62847-2;P62847-3;P62847;P62847-4	E7ETK0;A0A087WUS0;P62847-2;P62847-3;P62847;P62847-4	40S ribosomal protein S24	RPS24
-0.334025	-0.261466	-0.521018	0.246347	NaN	0.177471			20	20	19	18.2	18.2	17.5	152.45	114.27	2274200000	1494700000	779510000	1.39201	-0.37217	0.989013	0.211909	A0A0A0MRV0;Q9P2E9-3;Q9P2E9-2;Q9P2E9;A0A087WVV2;F8W7S5;A0A087WU26;A2A2S5;Q8N4C6-6;Q8N4C6-11	A0A0A0MRV0;Q9P2E9-3;Q9P2E9-2;Q9P2E9;A0A087WVV2;F8W7S5	Ribosome-binding protein 1	RRBP1
-0.292263	-0.351976	-0.25789	0.356144	NaN	0.0640551			10	10	3	37.9	37.9	13.8	17.258	83.646	3944000000	2634700000	1309300000	2.08345	-0.30071	0.412614	0.210099	P61254;J3KTJ8;J3QRI7;J3QQQ9;J3QQV1;J3QRC4;J3KSS0	P61254;J3KTJ8;J3QRI7;J3QQQ9;J3QQV1;J3QRC4	60S ribosomal protein L26	RPL26
NaN	NaN	NaN	NaN	0.162081	0.256407			5	5	5	38.4	38.4	38.4	18.648	110.03	114880000	106200000	8679000	0	NaN	0.85037	0.209244	Q14011;K7ENX8;K7ELV6;K7EJV5;K7ELT6;K7EJV1;K7EMY9;K7EPM4;K7ER40;K7EQR7;D6W5Y5;Q14011-2;K7EQX4;K7ENN6;K7EIF7;K7EQL0	Q14011;K7ENX8;K7ELV6;K7EJV5;K7ELT6;K7EJV1;K7EMY9;K7EPM4;K7ER40;K7EQR7;D6W5Y5;Q14011-2	Cold-inducible RNA-binding protein	CIRBP
NaN	NaN	0.0543624	0.20989	0.204516	NaN			6	6	6	27.9	27.9	27.9	37.19	53.462	473710000	277850000	195860000	0	0.0543624	2.0833	0.207203	Q52LJ0;Q52LJ0-2;H0YNA1	Q52LJ0;Q52LJ0-2	Protein FAM98B	FAM98B
-0.0339978	-0.111321	-0.200117	0.25689	0.253868	0.107688			4	4	4	34.8	34.8	34.8	13.015	15.404	3043600000	2003200000	1040400000	0.858483	-0.115145	1.27911	0.206149	P62854;Q5JNZ5	P62854;Q5JNZ5	40S ribosomal protein S26;Putative 40S ribosomal protein S26-like 1	RPS26;RPS26P11
-1.05505	-0.392611	-0.524521	NaN	0.1121	0.29678			5	5	5	28.3	28.3	28.3	24.955	38.532	863200000	661960000	201240000	1.08003	-0.657394	0.568502	0.20444	K7ELG9;Q3MHD2;Q3MHD2-2	K7ELG9;Q3MHD2;Q3MHD2-2	Protein LSM12 homolog	LSM12
-0.663968	-0.833362	-0.208778	0.291839	NaN	0.115033			11	11	11	17.6	17.6	17.6	98.004	79.489	1117900000	780220000	337680000	1.03243	-0.568702	0.583409	0.203436	H0YH87;V9GY86;Q99700-2;Q99700-4;Q99700;F8WB06;F8VQP2;Q99700-5;F8VRK6;F8VVY6;F8W0B5;F8WB05	H0YH87;V9GY86;Q99700-2;Q99700-4;Q99700;F8WB06;F8VQP2;Q99700-5	Ataxin-2	ATXN2
-0.282456	-0.172799	-0.253085	0.319618	0.20389	0.0866479			5	5	5	41.9	41.9	41.9	14.558	27.642	4064400000	2666200000	1398200000	1.72754	-0.236113	1.02616	0.203385	E7EPB3;P50914	E7EPB3;P50914	60S ribosomal protein L14	RPL14
-0.52976	-0.535792	-0.398418	-0.0717699	0.358059	0.314639			15	15	15	40	40	40	54.416	182.92	9151700000	6257100000	2894700000	2.07933	-0.48799	0.552465	0.200309	P26196;Q8IV96	P26196	Probable ATP-dependent RNA helicase DDX6	DDX6
-0.234109	-0.266212	-0.192579	0.218843	0.22132	0.154583			8	8	8	36	36	36	24.261	49.149	8456700000	5505100000	2951600000	2.07528	-0.230967	1.92356	0.198249	P26373;J3QSB4;P26373-2;H3BUK8;H3BTH3;J3KS98	P26373;J3QSB4;P26373-2	60S ribosomal protein L13	RPL13
-0.075292	-0.0822093	-0.138966	0.359971	0.184598	0.0398403			9	9	9	36.5	36.5	36.5	23.577	23.628	6227300000	4014600000	2212700000	1.40642	-0.0988223	0.769634	0.194803	P40429;M0QYS1;Q8J015;M0QZU1;A0A096LPE0;Q6NVV1	P40429;M0QYS1;Q8J015	60S ribosomal protein L13a	RPL13A;RPL13a
0.194591	0.225892	-0.0372363	0.130931	0.256286	0.196229			60	38	37	72.8	48.8	47.6	104.85	323.31	15148000000	8882100000	6265500000	0.579082	0.127749	1.48228	0.194482	O43707;O43707-2;F5GXS2;O43707-3;H7C144;K7EJH8;K7EP19	O43707;O43707-2	Alpha-actinin-4	ACTN4
NaN	NaN	NaN	0.0734089	0.279768	0.23008			2	2	2	7.7	7.7	7.7	46.228	23.392	10414000	4991600	5422900	0	NaN	1.05125	0.194419	A0A0A6YYC3;Q96HJ9-2;A0A0A6YYJ8;Q9Y383-3;Q9Y383-2;Q9Y383	A0A0A6YYC3;Q96HJ9-2;A0A0A6YYJ8;Q9Y383-3;Q9Y383-2;Q9Y383	Putative RNA-binding protein Luc7-like 2	C7orf55-LUC7L2;LUC7L2
NaN	NaN	NaN	0.166844	-0.0333628	0.446786			4	4	4	16.1	16.1	16.1	31.192	5.6293	23703000	12212000	11491000	0	NaN	0.523958	0.193422	Q13643	Q13643	Four and a half LIM domains protein 3	FHL3
4.63709	4.98864	4.76818	-0.0842267	0.467175	NaN	+		21	21	21	41.3	41.3	41.3	80.521	156.57	4441900000	1064700000	3377200000	3.34036	4.79797	0.212146	0.191474	F8W7U8;P49959;P49959-2;P49959-3;F5GXT0;F5H742;F5H256	F8W7U8;P49959;P49959-2;P49959-3	Double-strand break repair protein MRE11A	MRE11A
0.466862	0.420078	0.36087	0.236707	0.253021	0.0835197	+		30	30	30	29.7	29.7	29.7	131.37	166.81	4268700000	2381900000	1886900000	2.26823	0.415937	1.1464	0.191083	Q9UDY2-3;Q9UDY2;Q9UDY2-7;Q9UDY2-6;Q9UDY2-4;Q9UDY2-2;Q9UDY2-5;U3KQJ2;B1AN86	Q9UDY2-3;Q9UDY2;Q9UDY2-7;Q9UDY2-6;Q9UDY2-4;Q9UDY2-2;Q9UDY2-5	Tight junction protein ZO-2	TJP2
NaN	NaN	NaN	0.235482	0.129217	0.206768			4	4	4	7	7	7	107.14	11.286	23193000	6163700	17029000	0	NaN	1.57423	0.190489	P53618;E9PP73	P53618;E9PP73	Coatomer subunit beta	COPB1
NaN	NaN	NaN	NaN	NaN	0.188401			2	2	2	6.1	6.1	6.1	49.154	3.6558	8964100	7550100	1414000	0	NaN	0	0.188401	A0A087WW14;Q0VDG4-2;Q0VDG4;F8W0M9;C9JID8	A0A087WW14;Q0VDG4-2;Q0VDG4;F8W0M9;C9JID8	Secernin-3	SCRN3
1.24908	1.17728	1.28131	0.564622	NaN	-0.188414	+		9	9	9	33.8	33.8	33.8	32.426	62.878	1406100000	580870000	825210000	3.20875	1.23589	0.151785	0.188104	Q5QPK2;H0Y368;O60762;Q5QPJ9	Q5QPK2;H0Y368;O60762	Dolichol-phosphate mannosyltransferase subunit 1	DPM1
-1.23151	-1.18239	-0.995189	0.288181	-0.100376	0.365245	+		32	32	32	36.9	36.9	36.9	113.67	190.26	7274000000	3611600000	3662400000	2.399	-1.13637	0.482643	0.18435	Q9HCE1;Q5JR04;Q9HCE1-2;Q9HCE1-3	Q9HCE1;Q5JR04;Q9HCE1-2	Putative helicase MOV-10	MOV10
-0.338779	-0.213019	-0.175354	-0.330919	0.537346	0.338339			9	9	9	34.1	34.1	34.1	28.68	70.615	6055200000	3927900000	2127300000	1.40749	-0.242384	0.251228	0.181589	P62753;A2A3R5;A2A3R7	P62753;A2A3R5	40S ribosomal protein S6	RPS6
0.0332292	-0.154056	-0.0677574	NaN	0.211261	0.144568			5	5	5	26.7	26.7	26.7	19.687	60.035	2980200000	1940000000	1040100000	0.437337	-0.0628615	0.928292	0.177915	A0A0A0MRR7;P09234;Q5TAL2	A0A0A0MRR7;P09234	U1 small nuclear ribonucleoprotein C	SNRPC
0.475085	0.310224	0.202261	NaN	NaN	0.173639			5	5	5	20.6	20.6	20.6	35.398	9.0604	367640000	214270000	153380000	1.27201	0.32919	0	0.173639	P50479;P50479-2;C9J542	P50479;P50479-2	PDZ and LIM domain protein 4	PDLIM4
-0.0715273	-0.159557	-0.124	0.330099	0.151729	0.0367495			4	4	4	36	36	36	15.798	29.307	1974600000	1294500000	680150000	1.3602	-0.118361	0.744558	0.172859	P61353;K7ELC7;K7EQQ9;K7ERY7	P61353;K7ELC7;K7EQQ9	60S ribosomal protein L27	RPL27
-0.221489	-0.171336	-0.160427	0.18053	0.241718	0.0913952			12	12	12	58.2	58.2	58.2	24.205	143.54	13488000000	5584000000	7904100000	1.98994	-0.184417	1.22723	0.171214	P62241;Q5JR95	P62241;Q5JR95	40S ribosomal protein S8	RPS8
-0.317247	-0.169371	-0.286867	0.0874628	0.233152	NaN			9	9	9	37.5	37.5	37.5	36.112	72.096	1712700000	1105300000	607370000	1.53389	-0.257829	0.566189	0.160307	P05198;H0YJS4;G3V4T5	P05198;H0YJS4;G3V4T5	Eukaryotic translation initiation factor 2 subunit 1	EIF2S1
0.126709	0.246591	0.237931	-0.0459675	0.516822	0.000288558			12	12	12	43.2	43.2	43.2	38.496	52.711	1355900000	800490000	555390000	1.46767	0.203743	0.322623	0.157048	P40937;P40937-2;F5H5S0;E9PEP3;C9JH72;F5H304;F5H0U6	P40937;P40937-2	Replication factor C subunit 5	RFC5
NaN	NaN	NaN	0.315682	0.350724	-0.198676			7	7	7	8.5	8.5	8.5	108.63	17.762	66517000	46298000	20219000	0	NaN	0.325543	0.15591	Q8WX93-3;Q8WX93;Q8WX93-8;Q8WX93-2;Q8WX93-9;Q8WX93-5;H0YA05;Q8WX93-7;Q8WX93-4;H0Y952;Q8WX93-6;D6RBB1;A0A087WX60;Q86TC9-2;Q86TC9	Q8WX93-3;Q8WX93;Q8WX93-8;Q8WX93-2;Q8WX93-9;Q8WX93-5	Palladin	PALLD
-0.85564	-0.86289	-0.974433	0.269392	0.166844	0.0250289	+		30	30	30	36.8	36.8	36.8	121.89	157.89	5567500000	4125600000	1441900000	2.73771	-0.897654	0.790014	0.153755	Q9NZB2;Q9NZB2-6;Q9NZB2-4;A0A0C4DG79;Q9NZB2-5;Q9NZB2-2;A0A0C4DH52;Q5T035;F8W881;Q9NX05	Q9NZB2;Q9NZB2-6;Q9NZB2-4;A0A0C4DG79	Constitutive coactivator of PPAR-gamma-like protein 1	FAM120A
-0.245506	-0.17093	-0.148193	0.170053	0.182819	0.107554			19	19	19	60.4	60.4	60.4	31.324	101.63	42170000000	27573000000	14598000000	1.62841	-0.18821	1.65371	0.153476	P15880;H0YEN5;E9PQD7;I3L404;E9PMM9;E9PPT0;E9PM36;H3BNG3;H0YE27	P15880;H0YEN5;E9PQD7;I3L404;E9PMM9;E9PPT0;E9PM36	40S ribosomal protein S2	RPS2
0.689389	0.694122	0.717737	0.132116	0.188021	0.138159	+		25	25	24	84	84	80.2	26.688	165.67	60276000000	29231000000	31045000000	3.80505	0.700416	1.88008	0.152765	P23396;P23396-2;E9PL09;E9PPU1;F2Z2S8;H0YCJ7;H0YEU2;H0YF32;E9PQ96;E9PJH4;E9PK82;E9PSF4;E9PQX2;H0YES8	P23396;P23396-2;E9PL09;E9PPU1;F2Z2S8;H0YCJ7;H0YEU2	40S ribosomal protein S3	RPS3
-0.525206	-0.62311	-0.565012	-0.127683	0.413052	0.170438	+		9	9	9	37.6	37.6	37.6	34.91	222.57	5786500000	4083900000	1702600000	2.60761	-0.571109	0.362788	0.151936	Q00577	Q00577	Transcriptional activator protein Pur-alpha	PURA
-0.0541077	-0.0384063	-0.0994327	0.140648	0.155749	0.146264		+	154	154	11	67.7	67.7	6	274.61	323.31	173370000000	103640000000	69725000000	1.13707	-0.0639822	3.05023	0.147554	Q01082;A0A087WUZ3;Q01082-2;F8W6C1;P11277-3;P11277;P11277-2;E9PJZ2;H0YJE6	Q01082;A0A087WUZ3;Q01082-2	Spectrin beta chain, non-erythrocytic 1	SPTBN1
-0.205813	-0.231617	-0.134366	0.135535	0.16221	0.136979		+	9	9	9	67	67	67	12.784	59.083	7814200000	5044300000	2769900000	1.64772	-0.190599	2.44936	0.144908	P62888;E5RI99;A0A0C4DH44;A0A0B4J213;E5RJH3	P62888;E5RI99	60S ribosomal protein L30	RPL30
NaN	NaN	NaN	0.144699	NaN	NaN			3	3	3	12.6	12.6	12.6	39.584	7.2459	30760000	25254000	5506000	0	NaN	0	0.144699	C9JW69;P18754;P18754-2;C9JRH2;C9JMJ4;C9J3R0;C9JQZ4	C9JW69;P18754;P18754-2;C9JRH2;C9JMJ4;C9J3R0;C9JQZ4	Regulator of chromosome condensation	RCC1
0.930094	0.257856	0.186881	0.0524158	0.338453	0.037312			9	9	9	18.1	18.1	18.1	82.3	39.434	351400000	190490000	160900000	0.715349	0.458277	0.549077	0.142727	O75330-2;O75330;O75330-3;O75330-4;E5RIH2;E5RI30	O75330-2;O75330;O75330-3;O75330-4	Hyaluronan mediated motility receptor	HMMR
NaN	-0.0921095	-0.328616	-0.017052	0.166972	0.269392			6	5	5	8.5	7.1	7.1	75.042	9.789	128690000	83135000	45557000	0.486752	-0.210363	0.624756	0.139771	O00139-2;O00139-1;O00139-5;O00139;O00139-4	O00139-2;O00139-1;O00139-5;O00139;O00139-4	Kinesin-like protein KIF2A	KIF2A
-0.294296	-0.185835	-0.197368	0.0988237	0.16633	0.148218			13	13	13	50.5	50.5	50.5	24.604	159.55	15197000000	10130000000	5067600000	1.64943	-0.225833	1.6826	0.137791	P27635;X1WI28;F8W7C6;A0A087WV22;H7C123;H7C2C5;B8A6G2;A6QRI9;Q96L21;H7C2U2	P27635;X1WI28;F8W7C6;A0A087WV22	60S ribosomal protein L10	RPL10
NaN	-0.705641	-0.195137	0.137372	NaN	NaN			3	3	2	18.5	18.5	15.2	36.413	119.46	194320000	138210000	56109000	0.483805	-0.450389	0	0.137372	Q15417;E9PDU6;Q15417-3;Q15417-2	Q15417;E9PDU6;Q15417-3;Q15417-2	Calponin-3;Calponin	CNN3
-0.160298	-0.264807	-0.192315	0.135666	0.0343565	0.232661			9	9	9	51.3	51.3	51.3	18.079	37.762	3140800000	2040800000	1099900000	1.66101	-0.205807	0.842509	0.134228	M0R117;Q02543;M0R3D6;M0R1A7;M0R0P7	M0R117;Q02543;M0R3D6;M0R1A7;M0R0P7	60S ribosomal protein L18a	RPL18A
-0.358177	-0.335772	-0.291327	0.0822938	0.166201	0.133564	+		53	53	43	66	66	53.4	69.147	323.31	477960000000	316050000000	161920000000	2.44872	-0.328425	1.4577	0.127353	P17844;J3KTA4;P17844-2;J3QRQ7;J3KRX8;J3QSF1;J3QR02;J3KRZ1;X6RLV5;J3QKN9;J3QRN5;J3QS79;J3QLG9;J3QR62	P17844;J3KTA4;P17844-2	Probable ATP-dependent RNA helicase DDX5	DDX5
-0.213671	-0.185589	-0.136363	0.0871912	0.123136	0.163756			21	21	21	66.3	66.3	66.3	29.945	323.31	57501000000	37880000000	19621000000	1.80579	-0.178541	1.5222	0.124695	P61247;E9PFI5;D6RG13;H0Y9Y4;D6RAT0;H0Y8L7;D6RB09;D6R9B6;D6RAS7;D6RI02;D6RED7;D6RGE0	P61247;E9PFI5;D6RG13;H0Y9Y4;D6RAT0;H0Y8L7;D6RB09	40S ribosomal protein S3a	RPS3A
0.386811	0.461529	0.723515	-0.023871	0.0954519	0.299831			11	11	11	22.9	22.9	22.9	89.257	79.603	819630000	423310000	396310000	1.44456	0.523951	0.494216	0.123804	Q8N3E9;H0YGF8;F5GXC1;K7EQF2	Q8N3E9	1-phosphatidylinositol 4,5-bisphosphate phosphodiesterase delta-3	PLCD3
-0.19187	-0.137791	-0.197418	NaN	-0.0120243	0.258217			5	5	5	39.7	39.7	39.7	14.369	12.517	1084100000	724240000	359820000	1.9387	-0.175693	0.276032	0.123097	C9JXB8;C9JNW5;P83731	C9JXB8;C9JNW5;P83731	60S ribosomal protein L24	RPL24
-0.0423528	0.188654	-0.252209	0.121148	0.161823	0.0850168			15	15	12	19.2	19.2	15.7	122.29	132.54	1858400000	1130500000	727850000	0.092807	-0.0353025	1.506	0.122663	Q14126	Q14126	Desmoglein-2	DSG2
-0.0534189	-0.0862776	-0.0361116	0.171975	0.0828389	0.0854246			15	15	15	72.6	72.6	72.6	16.445	37.666	16046000000	10209000000	5837100000	1.23936	-0.0586027	1.21687	0.113413	P62249;M0R210;A0A087WZ27;M0R3H0;M0R1M5;Q6IPX4;M0QX76	P62249;M0R210;A0A087WZ27;M0R3H0;M0R1M5;Q6IPX4	40S ribosomal protein S16	RPS16;ZNF90
-0.261742	-0.080576	-0.349235	0.0524158	0.161307	0.123004			32	31	30	64.1	62.4	62.4	54.231	323.31	55154000000	36501000000	18653000000	0.998439	-0.230518	1.14202	0.112242	Q15233;Q15233-2;H7C367;C9JYS8;C9IZL7;C9J4X2	Q15233;Q15233-2;H7C367;C9JYS8	Non-POU domain-containing octamer-binding protein	NONO
NaN	-0.340971	NaN	0.111699	NaN	NaN			2	2	2	2.2	2.2	2.2	94.068	4.1257	257030000	169390000	87639000	0	-0.340971	0	0.111699	A0A0C4DG68;H0YDK8;A0A0A0MR59;E9PR38;H0YEH2;Q5T1Z4;Q5T1Z8;Q8TB72-2;Q8TB72-4;Q8TB72-3;Q8TB72;Q14671-4;Q14671-2;Q14671;Q14671-3;H0YDC5;H0YC97	A0A0C4DG68;H0YDK8;A0A0A0MR59;E9PR38;H0YEH2;Q5T1Z4;Q5T1Z8;Q8TB72-2;Q8TB72-4;Q8TB72-3;Q8TB72;Q14671-4;Q14671-2;Q14671;Q14671-3;H0YDC5;H0YC97	Pumilio homolog 2;Pumilio homolog 1	PUM2;PUM1
0.328147	0.134878	-0.2188	0.248413	0.0207689	0.0468402			5	5	5	50	50	50	8.2178	18.277	401190000	235660000	165530000	0.179324	0.0814085	0.551822	0.105341	P63173;J3KT73;J3QL01;J3KSP2	P63173;J3KT73;J3QL01	60S ribosomal protein L38	RPL38
-0.140937	-0.192975	-0.19347	0.160791	0.149389	0.00288247			9	9	9	56	56	56	14.463	40.344	11594000000	7703600000	3890300000	2.01381	-0.175794	0.753149	0.104354	P62899;H7C2W9;C9JU56;B7Z4E3;B7Z4C8;P62899-3;P62899-2;B8ZZK4	P62899;H7C2W9;C9JU56;B7Z4E3;B7Z4C8;P62899-3;P62899-2;B8ZZK4	60S ribosomal protein L31	RPL31
-0.247782	-0.3853	-0.298602	0.334111	0.0756011	-0.103906			12	12	12	51.9	51.9	51.9	17.695	40.346	5886600000	3924800000	1961800000	1.78774	-0.310561	0.295178	0.101935	P62750;H7BY10;K7EJV9;K7ERT8;A8MUS3;K7EMA7	P62750;H7BY10;K7EJV9;K7ERT8;A8MUS3;K7EMA7	60S ribosomal protein L23a	RPL23A
1.7726	1.66198	1.34613	-0.13106	0.333195	0.101381	+		11	11	11	80	80	80	22.782	91.511	4939500000	1973400000	2966100000	2.19602	1.59357	0.276469	0.101172	P04792;F8WE04;C9J3N8	P04792	Heat shock protein beta-1	HSPB1
0.000721115	-0.0801184	0.0712136	0.204266	0.0928839	-0.00540581			5	5	5	69.6	69.6	69.6	10.803	25.246	6205900000	3925100000	2280800000	0.0195772	-0.00272791	0.602798	0.097248	P62304;A6NHK2	P62304;A6NHK2	Small nuclear ribonucleoprotein E	SNRPE
0.945458	1.22027	1.38891	0.0959919	NaN	NaN			3	3	3	27.8	27.8	27.8	11.203	7.7017	688240000	263410000	424830000	1.93229	1.18488	0	0.0959919	P60903	P60903	Protein S100-A10	S100A10
-0.511012	-0.522385	-0.382363	-0.0658534	0.289834	0.0500489			7	7	7	35.6	35.6	35.6	33.24	94.321	2407500000	1655000000	752500000	2.04912	-0.47192	0.323225	0.0913433	Q96QR8	Q96QR8	Transcriptional activator protein Pur-beta	PURB
-0.428411	-0.19765	-0.364775	-0.11182	0.306379	0.0790197			26	24	24	42.7	41	41	92.468	323.31	2389200000	1590600000	798630000	1.38965	-0.330278	0.276278	0.0911929	P14625;Q96GW1;F8W026;H0YIV0;Q58FF3	P14625;Q96GW1	Endoplasmin	HSP90B1
-0.157271	-0.19253	-0.141971	0.104873	0.142609	0.0229004			10	10	5	73.1	73.1	43.8	14.839	29.81	14453000000	10740000000	3713500000	2.08427	-0.163924	0.901596	0.0901277	P62244;I3L3P7;I3L246;H3BV27;H3BT37;I3L303;H3BVC7	P62244;I3L3P7;I3L246	40S ribosomal protein S15a	RPS15A
-0.200366	-0.278409	-0.0852518	0.0557509	-0.140826	0.339821			13	13	13	64.2	64.2	64.2	15.747	28.078	4717900000	3021300000	1696500000	1.10416	-0.188009	0.218476	0.0849156	P46779;H0YKD8;P46779-2;P46779-3;H0YMF4;P46779-4;P46779-5;H0YLP6	P46779;H0YKD8;P46779-2;P46779-3;H0YMF4;P46779-4;P46779-5;H0YLP6	60S ribosomal protein L28	RPL28
-0.634711	-0.529906	-0.64548	0.0140695	0.128953	0.107956	+		22	22	20	53	53	50.2	52.164	323.31	52303000000	36441000000	15862000000	2.43044	-0.603365	0.84958	0.0836595	Q13283;E5RIZ6;E5RIF8;E5RH42;E5RJU8;Q13283-2;E5RI46;E5RH00	Q13283	Ras GTPase-activating protein-binding protein 1	G3BP1
-0.372505	-0.298478	-0.254238	0.11929	0.0731348	0.0518593			18	18	18	42.2	42.2	42.2	46.108	137.85	14603000000	9583800000	5019300000	1.91067	-0.308407	1.26068	0.0814279	P39023;G5E9G0;H7C422;B5MCW2;H7C3M2;F8WCR1;Q92901	P39023;G5E9G0;H7C422;B5MCW2	60S ribosomal protein L3	RPL3
-0.064495	-0.345876	-0.185212	0.0339339	-0.00353892	0.176067			7	7	7	21.3	21.3	21.3	52.269	94.227	511040000	324100000	186940000	0.869082	-0.198528	0.474509	0.0688208	F8WJN3;Q16630-3;Q16630;Q16630-2;F8W084	F8WJN3;Q16630-3;Q16630;Q16630-2	Cleavage and polyadenylation specificity factor subunit 6	CPSF6
-0.168674	-0.221791	-0.024678	0.121944	0.0350608	0.0332292			15	15	12	45.4	45.4	42.2	31.279	323.31	79604000000	51444000000	28160000000	0.84413	-0.138381	0.788792	0.0634113	P09012;M0R268;M0R221;M0R2B8;M0QZG7;M0QXK2;M0R0G9	P09012;M0R268;M0R221;M0R2B8;M0QZG7;M0QXK2	U1 small nuclear ribonucleoprotein A	SNRPA
NaN	NaN	NaN	NaN	0.111031	0.00791302			1	1	1	4	4	4	46.276	5.6275	16855000	13541000	3314700	0	NaN	0.34227	0.0594722	Q96P63;Q96P63-2	Q96P63;Q96P63-2	Serpin B12	SERPINB12
-0.101645	-0.25123	-0.196376	NaN	0.0788831	0.0321009			8	8	7	24.8	24.8	22.6	35.277	61.131	3305500000	2180600000	1125000000	1.27982	-0.183083	0.595233	0.055492	O15479	O15479	Melanoma-associated antigen B2	MAGEB2
NaN	0.507414	0.228603	NaN	0.0540844	NaN			3	3	3	8.6	8.6	8.6	58.14	20.402	183720000	105950000	77772000	0.637283	0.368009	0	0.0540844	O15371-2;O15371-3;O15371;B0QYA4;B0QYA5	O15371-2;O15371-3;O15371	Eukaryotic translation initiation factor 3 subunit D	EIF3D
0.220825	0.285225	0.122739	0.0126402	0.032242	0.113701			39	39	9	66.7	66.7	29.9	71.428	323.31	157080000000	90957000000	66126000000	1.32578	0.209596	0.638867	0.0528609	Q16643;Q16643-3;Q16643-2;D6RFI1;D6R9Q9;D6RCR4	Q16643;Q16643-3;Q16643-2	Drebrin	DBN1
0.490262	0.387914	0.381062	NaN	0.051024	NaN	+		10	10	10	62.6	62.6	62.6	21.77	77.753	3695300000	2074900000	1620500000	2.15467	0.419746	0	0.051024	Q9Y3D9;J3QLR8	Q9Y3D9;J3QLR8	28S ribosomal protein S23, mitochondrial	MRPS23
-0.172213	-0.341336	-0.135428	NaN	-0.134509	0.23634			10	10	10	55.5	55.5	55.5	12.538	32.316	3665200000	2268000000	1397200000	1.11801	-0.216326	0.081238	0.0509154	P18077;C9K025;F8WBS5;F8WB72	P18077;C9K025;F8WBS5;F8WB72	60S ribosomal protein L35a	RPL35A
-0.326534	-0.319928	-0.354686	0.0297002	0.0919367	0.0302654	+		20	20	20	75.8	75.8	75.8	22.127	323.31	26274000000	17542000000	8731800000	2.99215	-0.333716	0.873635	0.0506341	P62081;B5MCP9	P62081;B5MCP9	40S ribosomal protein S7	RPS7
-0.456128	-0.415692	-0.365147	0.0371714	0.0747794	0.0387171	+		30	30	30	65.7	65.7	65.7	55.21	323.31	28217000000	19044000000	9172600000	2.39261	-0.412322	1.25994	0.0502226	Q9Y3I0	Q9Y3I0	tRNA-splicing ligase RtcB homolog	RTCB
-0.48752	-0.444145	-0.574713	0.0313951	0.115166	-0.0039005	+		24	24	24	41.3	41.3	41.3	78.365	323.31	38702000000	26550000000	12152000000	2.23692	-0.502126	0.508132	0.0475537	Q14444;Q14444-2;G3V153;A0A087X082;E9PLA9	Q14444;Q14444-2;G3V153;A0A087X082;E9PLA9	Caprin-1	CAPRIN1
-0.810688	-0.857103	-0.71163	-0.231295	0.233397	0.139339	+		11	11	11	26.3	26.3	26.3	76.12	166.39	2409600000	1512400000	897200000	2.53566	-0.79314	0.112832	0.047147	Q7Z417	Q7Z417	Nuclear fragile X mental retardation-interacting protein 2	NUFIP2
-0.208994	-0.190404	-0.117709	0.0775164	-0.024766	0.0843364			5	5	5	29.4	29.4	29.4	15.807	14.878	3607800000	2218500000	1389200000	1.59982	-0.172369	0.488575	0.0456956	P62266;D6RD47;D6RDJ2;D6RIX0;D6R9I7	P62266;D6RD47	40S ribosomal protein S23	RPS23
0.401194	0.382059	0.50457	0.146916	-0.0541676	0.0409626			37	37	37	31.6	31.6	31.6	174.91	204.62	4818100000	2125700000	2692300000	2.10982	0.429274	0.281469	0.0445703	A0A0G2JNZ2;A0A0G2JPP5;Q14160;Q14160-3;A0A0G2JMS7;Q14160-2;H0YCG0;H0YDF9;Q5T0G3;Q9BTT6-2;Q9BTT6	A0A0G2JNZ2;A0A0G2JPP5;Q14160;Q14160-3;A0A0G2JMS7;Q14160-2	Protein scribble homolog	SCRIB
-0.252999	-0.195302	-0.125353	0.0277203	0.0590784	0.0465608			25	25	25	72.6	72.6	72.6	29.597	235.76	65777000000	43920000000	21857000000	1.45236	-0.191218	1.40282	0.0444532	P62701;Q8TD47;C9JEH7;P22090	P62701	40S ribosomal protein S4, X isoform	RPS4X
-0.174296	-0.125337	-0.00311961	0.104739	0.0282862	-0.000678201			11	11	11	29.2	29.2	29.2	29.975	114.99	38391000000	24259000000	14133000000	0.730754	-0.100917	0.52913	0.0441157	A8MT02;P14678-2;P14678;P14678-3;J3QLE5;P63162;P63162-2;J3KRY3;S4R3P3	A8MT02;P14678-2;P14678;P14678-3;J3QLE5;P63162;P63162-2;J3KRY3;S4R3P3	Small nuclear ribonucleoprotein-associated proteins B and B;Small nuclear ribonucleoprotein-associated protein N	SNRPB;SNRPN
-0.150721	-0.127116	-0.200664	NaN	-0.172441	0.25084			4	4	4	30.1	30.1	30.1	15.616	13.87	1114600000	732700000	381910000	1.74522	-0.1595	0.0538387	0.0391997	D3YTB1;F8W727;P62910;D3YTI8	D3YTB1;F8W727;P62910	60S ribosomal protein L32	RPL32
-0.155148	-0.0948032	-0.118727	-0.00118347	0.00877379	0.105008			5	5	5	54.6	54.6	54.6	13.281	73.085	6523100000	4226700000	2296400000	1.70382	-0.122893	0.416682	0.0375326	P62314;J3QLI9;J3QLR7	P62314;J3QLI9	Small nuclear ribonucleoprotein Sm D1	SNRPD1
0.505383	0.555914	0.663026	-0.0530147	0.0486547	0.115566	+		24	24	24	34.9	34.9	34.9	91.079	323.31	14610000000	7063900000	7545900000	2.1888	0.574774	0.277052	0.0370687	Q8IXB1;Q8IXB1-2;Q8IXB1-3;E7EP04;A0A087WXH7;H7C1G0	Q8IXB1;Q8IXB1-2	DnaJ homolog subfamily C member 10	DNAJC10
0.654711	0.473839	0.529571	0.09815	-0.0145432	0.0271541			9	9	9	8.1	8.1	8.1	150.6	55.992	408980000	200060000	208910000	2.03467	0.552707	0.42209	0.0369203	Q96RT1-6;Q96RT1-4;Q96RT1-5;Q96RT1-3;Q96RT1-9;Q96RT1-2;Q96RT1;Q96RT1-8;Q96RT1-7;B4DIP2;H0Y9E8;A0A075B6E9;Q96NW7-2;Q96NW7	Q96RT1-6;Q96RT1-4;Q96RT1-5;Q96RT1-3;Q96RT1-9;Q96RT1-2;Q96RT1;Q96RT1-8;Q96RT1-7	Protein LAP2	ERBB2IP
-1.16304	-0.896845	-1.17981	0.167229	0.0519985	-0.117161	+		23	23	23	41.4	41.4	41.4	89.321	117.35	1706000000	1403200000	302750000	2.14712	-1.0799	0.14247	0.0340222	P55072;C9IZA5;C9JUP7	P55072	Transitional endoplasmic reticulum ATPase	VCP
-0.217591	-0.156531	-0.150737	0.0183493	-0.00362573	0.0843364			18	18	18	56	56	56	29.225	98.275	16897000000	10602000000	6295300000	1.83524	-0.174953	0.471158	0.03302	P18124;A8MUD9;C9JIJ5;C9JZ88	P18124;A8MUD9	60S ribosomal protein L7	RPL7
1.71458	2.12121	1.81549	-0.0645402	0.0751904	0.0801119	+		18	18	18	51.8	51.8	51.8	51.156	61.661	1863100000	663520000	1199500000	2.3783	1.88376	0.230059	0.030254	Q9Y230;Q9Y230-2;M0R0Y3;X6R2L4;M0QXI6	Q9Y230;Q9Y230-2;M0R0Y3	RuvB-like 2	RUVBL2
0.339137	0.0942361	0.235972	-0.129718	0.182819	0.0364681			8	8	8	27.8	27.8	27.8	41.265	55.053	675450000	360880000	314560000	1.0552	0.223115	0.112213	0.0298564	F5H669;Q8N684-2;Q8N684;Q8N684-3;J3QT54;F5H6M0;F5H047;C9J286;C9J323;C9JM38;F5H5B7;F5H1W4;F5H2K8;F5H6P5;F5H6A8;F5GXA3	F5H669;Q8N684-2;Q8N684;Q8N684-3;J3QT54;F5H6M0;F5H047	Cleavage and polyadenylation specificity factor subunit 7	CPSF7
0.603122	0.372172	0.344942	NaN	0.128425	-0.0754288			10	10	10	19.2	19.2	19.2	88.549	80.778	533560000	288290000	245270000	1.48237	0.440079	0.0767143	0.0264983	Q13263;Q13263-2;M0R0K9;M0R2I3;M0R3C0	Q13263;Q13263-2;M0R0K9	Transcription intermediary factor 1-beta	TRIM28
-0.466616	-0.259029	-0.314607	0.037593	0.0157831	0.0204844			14	12	12	35.9	33	33	50.817	135.56	9109600000	6315500000	2794000000	1.51492	-0.346751	1.18429	0.0246202	Q9UN86-2;Q9UN86;D6RAC7;D6RB17;D6RGJ4;D6RBM9;D6REX8;D6RBR0;D6RE13;D6RBW8;D6R9X5;D6R9A4	Q9UN86-2;Q9UN86;D6RAC7;D6RB17;D6RGJ4	Ras GTPase-activating protein-binding protein 2	G3BP2
0.396379	NaN	0.135141	0.18612	0.0905825	-0.203452			16	16	16	10.1	10.1	10.1	218.52	26.163	170930000	102780000	68149000	0.536376	0.26576	0.0683956	0.0244169	Q14008-2;Q14008;Q14008-3;H0YDX5;H0YCF6;H0YEK7	Q14008-2;Q14008;Q14008-3	Cytoskeleton-associated protein 5	CKAP5
-0.218464	-0.182901	-0.165224	-0.00138564	-0.00656479	0.0765591	+		31	31	31	35.8	35.8	35.8	76.613	323.31	47168000000	30230000000	16938000000	2.16741	-0.188863	0.314633	0.0228695	P19338;H7BY16;C9JYW2;C9JLB1;C9J1H7;C9JWL1	P19338;H7BY16	Nucleolin	NCL
0.283211	0.537147	0.410558	0.0597706	0.0970713	-0.0952347			20	20	19	15.2	15.2	14.6	197.41	91.994	1255500000	676570000	578940000	1.51615	0.410305	0.118874	0.0205358	O43166-3;O43166-2;O43166;F5GYF8;H0YJY2;Q9P2F8	O43166-3;O43166-2;O43166;F5GYF8	Signal-induced proliferation-associated 1-like protein 1	SIPA1L1
-0.204167	-0.177262	-0.204117	0.171719	0.104471	-0.21677	+		14	14	14	21.7	21.7	21.7	107.97	86.153	1108700000	711520000	397200000	2.67763	-0.195182	0.0535719	0.0198068	P78347-2;P78347-4;P78347-3;P78347;P78347-5;A0A087WW90;A0A0D9SF80;A0A0A0MSY2;Q86UP8-3;Q86UP8;Q6EKJ0	P78347-2;P78347-4;P78347-3;P78347	General transcription factor II-I	GTF2I
0.415542	0.33754	0.143524	0.0082	0.0203421	0.00331442			28	28	2	37	37	2.2	80.657	281.58	15658000000	8864500000	6793900000	1.18015	0.298869	0.767435	0.0106189	Q0ZGT2;Q0ZGT2-4;Q0ZGT2-3	Q0ZGT2;Q0ZGT2-4;Q0ZGT2-3	Nexilin	NEXN
-0.0549767	-0.0319609	-0.138632	0.013498	0.0243196	-0.0347366			164	164	3	69.8	69.8	1.3	284.54	323.31	141940000000	85691000000	56249000000	0.835245	-0.0751899	0.017717	0.00102702	Q13813;Q13813-2;A0A0D9SGF6	Q13813;Q13813-2;A0A0D9SGF6	Spectrin alpha chain, non-erythrocytic 1	SPTAN1
-0.0103088	-0.16309	-0.0544672	NaN	NaN	-0.000577203			14	8	8	49.5	20.3	20.3	40.313	24.626	910740000	530500000	380240000	0.626626	-0.0759554	0	-0.000577203	Q9BWF3;E9PB51;Q9BQ04;Q9BWF3-4;D6R9K7;J3QRR5;Q9BWF3-3;Q9BWF3-2;E9PLB0;E9PM61;U3KQD5	Q9BWF3;E9PB51;Q9BQ04;Q9BWF3-4;D6R9K7;J3QRR5;Q9BWF3-3;Q9BWF3-2	RNA-binding protein 4;RNA-binding protein 4B	RBM4;RBM4B
0.616922	1.08161	0.616075	NaN	-0.00495696	NaN			2	2	2	9.1	9.1	9.1	26.76	4.6563	122790000	58796000	63995000	1.41922	0.771537	0	-0.00495696	A8MU58;F8W950;Q13155	A8MU58;F8W950;Q13155	Aminoacyl tRNA synthase complex-interacting multifunctional protein 2	AIMP2
-0.284124	-0.225245	-0.113458	0.00518438	0.0174944	-0.0412835			11	11	2	21	21	7	64.929	202.96	131460000000	85558000000	45905000000	1.27166	-0.207609	0.118033	-0.00620158	B0QYK0;Q01844-6;Q01844-3;Q01844;Q01844-5;A0A0D9SFL3;C9JGE3;Q01844-2;F8WC90;Q01844-4	B0QYK0;Q01844-6;Q01844-3;Q01844;Q01844-5;A0A0D9SFL3;C9JGE3;Q01844-2	RNA-binding protein EWS	EWSR1
1.0345	0.958434	0.712112	-0.0494719	-0.106296	0.133695			13	13	13	64.6	64.6	64.6	28.994	149.31	6380800000	3207400000	3173400000	1.94143	0.901681	0.0322958	-0.00735765	P50402;Q5HY57;F8WEQ1	P50402;Q5HY57	Emerin	EMD
-0.32009	-0.254582	-0.0959746	0.132643	NaN	-0.148545			19	19	19	36.8	36.8	36.8	51.556	123.49	22486000000	12590000000	9896400000	1.10618	-0.223549	0.0159071	-0.00795107	P08621;P08621-2;P08621-3;M0QYR1;P08621-4;M0QX04	P08621;P08621-2;P08621-3	U1 small nuclear ribonucleoprotein 70 kDa	SNRNP70
-0.193866	-0.172896	-0.366113	0.037312	-0.0682111	-0.01265			134	134	134	47.4	47.4	47.4	629.09	323.31	27652000000	15586000000	12065000000	1.24088	-0.244292	0.166974	-0.0145164	Q09666;E9PQE3;E9PJZ0;E9PKR9;E9PJC6;E9PLK4;Q09666-2;P48552	Q09666	Neuroblast differentiation-associated protein AHNAK	AHNAK
0.0434844	-0.30107	-0.328236	-0.296669	0.266996	NaN			7	7	7	29	29	29	34.362	35.614	1021400000	681100000	340260000	0.612213	-0.195274	0.0147901	-0.0148363	P46777;Q5T7N0	P46777;Q5T7N0	60S ribosomal protein L5	RPL5
NaN	NaN	NaN	NaN	NaN	-0.0148785			1	1	1	6.5	6.5	6.5	19.247	4.5054	13878000	9461600	4416800	0	NaN	0	-0.0148785	H7C2Y5;Q9UBS4	H7C2Y5;Q9UBS4	DnaJ homolog subfamily B member 11	DNAJB11
0.0302654	0.0308304	0.0852886	0.194087	0.0453032	-0.286973			5	5	5	24.9	24.9	24.9	26.698	19.272	318670000	181770000	136900000	0.935491	0.0487948	0.0355646	-0.0158608	A0A0U1RQH7;H0Y4X3;G3XAC6;Q14498-3;Q14498-2;Q14498;A0A0U1RQW2;Q5QP23;Q5QP22	A0A0U1RQH7;H0Y4X3;G3XAC6;Q14498-3;Q14498-2;Q14498	RNA-binding protein 39	RBM39
-0.270956	0.100843	-0.614138	0.126973	-0.0809422	-0.0937558			5	5	5	5.5	5.5	5.5	102.69	9.5883	107420000	65802000	41619000	0.477626	-0.261417	0.0733176	-0.0159084	P49916-3;P49916;P49916-4;P49916-2;K7EQB6;K7ERZ5;K7ENR9	P49916-3;P49916;P49916-4;P49916-2;K7EQB6;K7ERZ5	DNA ligase 3	LIG3
1.05721	0.998845	0.941407	0.0518593	-0.189236	0.0749164	+		17	17	17	71.6	71.6	71.6	35.076	182.87	3352500000	1599000000	1753500000	2.95174	0.999153	0.0818112	-0.0208201	P63244;J3KPE3;D6RAC2;H0YAF8;D6RHH4;H0Y8W2;D6REE5;H0YAM7;D6R9Z1;D6R9L0;D6RBD0;D6RFX4;D6RAU2;E9PD14;D6RFZ9;D6RF23;H0Y8R5;D6RGK8;D6RHJ5;D6R909;H0Y9P0;D6RDI0	P63244;J3KPE3;D6RAC2;H0YAF8;D6RHH4;H0Y8W2;D6REE5;H0YAM7;D6R9Z1;D6R9L0	Guanine nucleotide-binding protein subunit beta-2-like 1;Guanine nucleotide-binding protein subunit beta-2-like 1, N-terminally processed	GNB2L1
-0.412769	-0.438679	-0.441125	-0.0875494	0.0988237	-0.074912	+		14	14	9	50.3	50.3	42.9	35.924	323.31	32074000000	21901000000	10174000000	3.35358	-0.430858	0.120353	-0.0212126	P67809;A0A087X1S2;H0Y449;C9J5V9;Q9Y2T7	P67809;A0A087X1S2;H0Y449	Nuclease-sensitive element-binding protein 1	YBX1
-0.47313	-0.140985	-0.124251	-0.180283	-0.116692	0.228726			12	12	7	36.7	36.7	22.2	43.448	74.369	5414600000	3417700000	1996800000	0.788819	-0.246122	0.0582853	-0.0227495	Q01085-2;Q01085;E7ETJ9;E7ETC0;A6NKZ9;F8WE16	Q01085-2;Q01085;E7ETJ9;E7ETC0	Nucleolysin TIAR	TIAL1
-0.25972	-0.334516	-0.428352	0.0994973	-0.124063	-0.0573767			16	16	16	70.3	70.3	70.3	16.06	49.666	12831000000	8319100000	4511500000	1.70172	-0.340863	0.142563	-0.0273141	P39019;A0A075B6E2;M0R2L9;M0QXK4;M0QYF7;M0R140	P39019;A0A075B6E2	40S ribosomal protein S19	RPS19
-0.170264	-0.211047	-0.112958	0.0756011	-0.0112826	-0.146419			17	15	15	37.2	34.8	34.8	61.557	323.31	68765000000	43634000000	25131000000	1.54445	-0.164756	0.146899	-0.027367	Q92804-2;Q92804;A0A075B7D9;A0A075B7F4;A0A075B7F2;A0A075B7C1;A0A075B7E4	Q92804-2;Q92804;A0A075B7D9	TATA-binding protein-associated factor 2N	TAF15
-0.457435	-0.408876	-0.382946	-0.0415507	-0.0256763	-0.0227567	+		17	17	17	61.2	61.2	61.2	34.273	321.98	46060000000	31317000000	14743000000	2.56269	-0.416419	1.44524	-0.0299946	P05388;F8VWS0;P05388-2;F8VU65;F8VW21;F8VPE8;G3V210;F8VQY6;F8VRK7;F8VZS0;Q8NHW5;F8VWV4;F8VS58;F8W1K8	P05388;F8VWS0;P05388-2;F8VU65;F8VW21;F8VPE8;G3V210;F8VQY6;F8VRK7;F8VZS0;Q8NHW5;F8VWV4	60S acidic ribosomal protein P0;60S acidic ribosomal protein P0-like	RPLP0;RPLP0P6
-0.222768	-0.335153	-0.30545	0.00834347	-0.0294556	-0.072771			13	13	13	62.3	62.3	62.3	17.222	49.237	13817000000	9170400000	4647000000	1.87366	-0.28779	0.503855	-0.0312944	P62277;J3KMX5;E9PS50	P62277;J3KMX5	40S ribosomal protein S13	RPS13
0.064469	0.066537	-0.0989536	0.032242	0.0528332	-0.190701			17	17	17	53.7	53.7	53.7	44.965	169.88	4433100000	2613100000	1820000000	0.0637455	0.0106841	0.157493	-0.0352085	Q8NC51;Q8NC51-3;Q8NC51-2;Q8NC51-4	Q8NC51;Q8NC51-3;Q8NC51-2;Q8NC51-4	Plasminogen activator inhibitor 1 RNA-binding protein	SERBP1
0.0182068	-0.00141456	0.0267293	0.0522768	-0.211782	0.0531114			456	3	3	78.5	0.5	0.5	516.19	39.556	27658000000	16962000000	10696000000	0.650143	0.0145072	0.138825	-0.0354646	Q15149-4	Q15149-4	Plectin	PLEC
-0.209345	-0.365165	-0.0526256	0.087327	-0.237217	0.0411028			7	7	7	41.6	41.6	41.6	21.728	35.688	5820600000	3326700000	2494000000	0.834355	-0.209045	0.122197	-0.0362625	J3QQ67;Q07020;G3V203;H0YHA7;Q07020-2;F8VUA6;F8VYV2;A0A075B7A0;F8VXR6	J3QQ67;Q07020;G3V203;H0YHA7;Q07020-2;F8VUA6;F8VYV2;A0A075B7A0	60S ribosomal protein L18	RPL18
NaN	NaN	NaN	-0.218783	-0.0969617	0.204391			5	5	5	9.7	9.7	9.7	76.046	4.764	16483000	8788400	7694400	0	NaN	0.099241	-0.0371179	Q5THR1;Q9H5Z1-2;Q9H5Z1;F2Z2Z2	Q5THR1;Q9H5Z1-2;Q9H5Z1	Probable ATP-dependent RNA helicase DHX35	DHX35
-0.0909258	-0.0835386	-0.0964527	-0.0249275	-0.0538681	-0.0376805	+		10	10	10	43	43	43	16.273	93.82	9101600000	5825100000	3276500000	2.76661	-0.0903057	1.36145	-0.0388254	P62263;H0YB22;E5RH77	P62263;H0YB22;E5RH77	40S ribosomal protein S14	RPS14
-0.0923248	-0.105551	-0.183277	0.00317045	-0.0854967	-0.058518			17	17	17	59.9	59.9	59.9	17.718	83.743	34734000000	22700000000	12034000000	1.33329	-0.127051	0.666555	-0.0469481	P62269;A0A0G2JQH2;Q5GGW2;J3JS69	P62269	40S ribosomal protein S18	RPS18
0.583326	0.720454	0.265557	NaN	-0.049233	NaN			4	4	2	57.3	57.3	32.6	10.366	28.255	301790000	179240000	122540000	1.21908	0.523112	0	-0.049233	P63167;F8VXL2;F8VRV5;F8VXI7	P63167;F8VXL2;F8VRV5	Dynein light chain 1, cytoplasmic	DYNLL1
0.153027	0.395172	-0.224469	-0.0163369	0.0794293	-0.212434			10	10	10	46.9	46.9	46.9	38.629	323.31	6704900000	4029900000	2675100000	0.214496	0.10791	0.207042	-0.0497804	Q13501-2;Q13501;E7EMC7;E9PFW8;C9JRJ8;E3W990	Q13501-2;Q13501;E7EMC7;E9PFW8	Sequestosome-1	SQSTM1
-0.0412835	-0.122617	0.162983	-0.104061	NaN	-0.00179007			10	8	8	10.9	9.4	9.4	123.34	82.96	2482500000	1621000000	861500000	0.00110636	-0.000305674	0.310647	-0.0529258	Q9ULJ8;Q9ULJ8-4;Q9ULJ8-5;Q9ULJ8-3	Q9ULJ8;Q9ULJ8-4;Q9ULJ8-5;Q9ULJ8-3	Neurabin-1	PPP1R9A
0.0404014	-0.0371771	0.0832474	-0.0429769	-0.0462356	-0.0713455			472	472	18	78.5	78.5	2.7	531.78	323.31	4364000000000	2569900000000	1794100000000	0.301582	0.0288239	1.56997	-0.0535193	Q15149	Q15149	Plectin	PLEC
-0.223795	-0.237251	-0.143389	-0.10799	-0.00855159	-0.0553664			18	18	2	28	28	7	53.354	323.31	674230000000	437840000000	236390000000	1.68814	-0.201478	0.734777	-0.0573026	P35637-2;P35637	P35637-2;P35637	RNA-binding protein FUS	FUS
0.0710762	0.0928839	-0.0299268	0.000865329	-0.0076666	-0.166551			5	5	5	45.4	45.4	45.4	13.373	29.507	9498700000	6091900000	3406800000	0.444891	0.0446778	0.398248	-0.0577842	P60866;P60866-2;E5RJX2;E5RIP1;G3XAN0	P60866;P60866-2;E5RJX2	40S ribosomal protein S20	RPS20
-0.693155	-0.463012	-0.77972	0.0604624	-0.0455655	-0.19164			6	6	6	19.7	19.7	19.7	43.476	60.511	1523800000	1072000000	451770000	1.68231	-0.645295	0.296902	-0.0589142	Q6NZI2;Q6NZI2-2;Q6NZI2-3	Q6NZI2;Q6NZI2-2	Polymerase I and transcript release factor	PTRF
-0.734563	-0.76648	-0.764297	NaN	0.0691523	-0.1955	+		3	1	1	5.9	2.4	2.4	63.704	5.7602	795780000	577760000	218010000	3.73093	-0.755114	0.14482	-0.0631741	O00425	O00425	Insulin-like growth factor 2 mRNA-binding protein 3	IGF2BP3
NaN	0.0743684	0.0617071	0.0200577	-0.146819	NaN			2	2	2	10.4	10.4	10.4	30.638	4.6185	2569900000	1493800000	1076200000	1.22867	0.0680377	0.231779	-0.0633805	A6NIZ0;Q9GZM8-3;Q9GZM8;Q9GZM8-2;J3KT16;I3L2R3;I3L2T8;J3KRK9;I3L533;J3QL85;I3L2R9;I3L522;J3QSD2;J3QRZ1;X5DR54;Q9NXR1-2;Q9NXR1	A6NIZ0;Q9GZM8-3;Q9GZM8;Q9GZM8-2;J3KT16;I3L2R3;I3L2T8;J3KRK9;I3L533;J3QL85;I3L2R9;I3L522;J3QSD2;J3QRZ1;X5DR54;Q9NXR1-2;Q9NXR1	Nuclear distribution protein nudE-like 1;Nuclear distribution protein nudE homolog 1	NDEL1;NDE1
0.194717	0.165044	0.210638	-0.0110935	-0.0880094	-0.0998964	+		11	11	1	50.6	50.6	6.7	20.252	53.237	21319000000	12833000000	8486300000	2.3097	0.190133	0.853857	-0.0663331	P62913;Q5VVC8;Q5VVC9	P62913;Q5VVC8;Q5VVC9	60S ribosomal protein L11	RPL11
-0.521183	-0.698436	-0.650091	-0.114348	-0.0190096	-0.0866758	+		10	10	10	23.4	23.4	23.4	55.272	177.48	7312100000	5106900000	2205200000	2.14705	-0.623237	0.912537	-0.0733443	Q8NCA5-2;Q8NCA5;E9PH82;C9J3G8	Q8NCA5-2;Q8NCA5;E9PH82	Protein FAM98A	FAM98A
0.577151	0.592062	0.535157	-0.0688162	-0.0146307	-0.142242	+		19	19	19	57.3	57.3	57.3	57.861	323.31	8697700000	4518600000	4179100000	3.04674	0.568123	0.747408	-0.0752296	P52292;J3QLL0;J3KS65;J3QL07	P52292	Importin subunit alpha-1	KPNA2
0.377624	-0.292899	-2.13112	NaN	-0.0757785	NaN			4	4	4	5.2	5.2	5.2	107.78	9.7646	9506900000	8127900000	1379000000	0.338152	-0.682133	0	-0.0757785	P55060-3;P55060;P55060-4	P55060-3;P55060;P55060-4	Exportin-2	CSE1L
-0.267462	-0.184933	-0.28079	-0.152131	-0.00337989	NaN			11	11	11	60.9	60.9	60.9	19.586	90.28	4011100000	2672900000	1338200000	1.83222	-0.244395	0.31349	-0.0777556	A0A087WXM6;J3QQT2;J3KRX5;A0A0A6YYL6;P18621;P18621-3;J3QLC8;A0A0A0MRF8;P18621-2;J3KRB3;A0A087WWH0;J3QS96;A0A087WY81;J3KSJ0	A0A087WXM6;J3QQT2;J3KRX5;A0A0A6YYL6;P18621;P18621-3;J3QLC8;A0A0A0MRF8;P18621-2;J3KRB3;A0A087WWH0;J3QS96;A0A087WY81	60S ribosomal protein L17	RPL17;RPL17-C18orf32
-0.824725	-0.7355	-0.736004	-0.171953	-0.124267	0.0585243	+		17	17	15	35.9	35.9	32.6	66.785	193.13	5858200000	4328200000	1530000000	2.82448	-0.765409	0.424308	-0.0792321	F8W930;Q9Y6M1-1;Q9Y6M1;Q9Y6M1-5;Q9Y6M1-6;Q9Y6M1-3;Q9Y6M1-4;O00425-2;Q9NZI8-2;Q9NZI8	F8W930;Q9Y6M1-1;Q9Y6M1;Q9Y6M1-5;Q9Y6M1-6;Q9Y6M1-3;Q9Y6M1-4	Insulin-like growth factor 2 mRNA-binding protein 2	IGF2BP2
0.201383	0.205142	0.0690147	-0.0698153	0.0102069	-0.183408			21	21	21	35.4	35.4	35.4	92.755	248.73	4063300000	2336600000	1726700000	1.1468	0.158513	0.543604	-0.0810056	Q99959-2;Q99959;B8QGS9;A0A087WXY2	Q99959-2;Q99959;B8QGS9	Plakophilin-2	PKP2
-0.111555	-0.134715	-0.223306	-0.120875	-0.0998346	-0.023475			7	7	7	44.8	44.8	44.8	13.742	24.618	7951900000	5218900000	2733000000	1.35442	-0.156525	0.956043	-0.0813947	P62851	P62851	40S ribosomal protein S25	RPS25
-0.0493375	-0.0232844	0.000432815	-0.0778022	-0.0587284	-0.109919			5	5	5	55.8	55.8	55.8	13.291	137.26	21482000000	13731000000	7751500000	0.626964	-0.024063	1.50162	-0.0821499	P62318-2;P62318;H3BT13	P62318-2;P62318;H3BT13	Small nuclear ribonucleoprotein Sm D3	SNRPD3
-0.544351	-0.398227	-0.509923	-0.172067	-0.0935711	0.0114957			30	30	22	41.9	41.9	28.8	69.491	323.31	54680000000	36300000000	18380000000	2.0864	-0.484167	0.598345	-0.0847142	Q96PK6;Q96PK6-2;A0A0A6YYI9;F8WDX3;A0A0A0MSL8;B8ZZ74;Q96PK6-3;Q96PK6-4	Q96PK6	RNA-binding protein 14	RBM14
0.000288558	0.0586628	-0.100855	-0.158075	-0.0076666	-0.097255			12	12	12	49.3	49.3	49.3	26.227	72.287	3383000000	2098000000	1285000000	0.100921	-0.013968	0.73856	-0.0876656	O43809;H3BND3;H3BV41	O43809;H3BND3	Cleavage and polyadenylation specificity factor subunit 5	NUDT21
0.629753	0.278104	0.00432164	-0.0939098	-0.0394439	-0.134445			11	11	11	14.4	14.4	14.4	100.18	34.292	517890000	292260000	225640000	0.628905	0.304059	1.0791	-0.0892664	P49756;P49756-2;P49756-3;E9PQU5;H0YE46;E9PSE8	P49756;P49756-2;P49756-3	RNA-binding protein 25	RBM25
NaN	NaN	NaN	NaN	-0.104697	NaN			5	5	5	69.4	69.4	69.4	11.006	7.049	20282000	12418000	7863900	0	NaN	0	-0.104697	P01040;C9J0E4	P01040;C9J0E4	Cystatin-A;Cystatin-A, N-terminally processed	CSTA
-0.287008	-0.42909	-0.567575	-0.148929	-0.077589	NaN			11	11	11	24	24	24	68.137	72.468	745670000	501560000	244110000	1.46836	-0.427891	0.711668	-0.113259	P27694;I3L4R8;I3L524;I3L2M5	P27694;I3L4R8	Replication protein A 70 kDa DNA-binding subunit;Replication protein A 70 kDa DNA-binding subunit, N-terminally processed	RPA1
0.00877379	0.369271	0.0163537	-0.16647	-0.131266	-0.0425311			7	7	7	28.4	28.4	28.4	35.243	27.403	762730000	454650000	308080000	0.41551	0.131466	1.03892	-0.113422	P35250-2;P35250;H7C5P1;H7C5Q7;F8WC37;H7C5A0;H7C5G4;H7C5P4;A0A087WVY3;H7C5S7;H7C596	P35250-2;P35250	Replication factor C subunit 2	RFC2
0.040121	0.0924781	0.265197	-0.105815	0.0901759	-0.324708			18	18	14	32.2	32.2	28	84.765	137.3	2350900000	1532000000	818930000	0.720141	0.132599	0.35292	-0.113449	B4DGU4;P35222;P35222-2;C9IZ65;E9PDF9;E7EV28;E7EMJ5	B4DGU4;P35222	Catenin beta-1	CTNNB1
-0.486833	-0.615265	-0.564286	-0.0566413	-0.00760859	-0.279599	+		22	22	22	37.3	37.3	37.3	91.838	180.82	2583900000	1789100000	794830000	2.34796	-0.555461	0.51661	-0.114616	Q09161;X6R941;F2Z2T1	Q09161	Nuclear cap-binding protein subunit 1	NCBP1
NaN	NaN	NaN	0.0897694	-0.319154	NaN			2	1	1	0.7	0.7	0.7	151.98	3.0952	33618000	19700000	13918000	0	NaN	0.170983	-0.114692	A9Z1Z3-3;A9Z1Z3	A9Z1Z3-3;A9Z1Z3	Fer-1-like protein 4	FER1L4
0.166715	0.175684	0.167743	-0.0790055	-0.0929863	-0.181771	+		60	60	1	46	46	0.9	189.67	323.31	29724000000	16616000000	13108000000	3.55655	0.170048	1.17352	-0.117921	G5E9E7;A0A087X0K9;Q07157-2	G5E9E7;A0A087X0K9;Q07157-2	Tight junction protein ZO-1	TJP1
-0.286938	-0.373533	-0.321171	-0.221842	-0.0883774	-0.0441814	+		10	10	10	65.9	65.9	65.9	15.55	174.74	7584400000	5210400000	2374000000	2.2314	-0.327214	0.802853	-0.118134	P08708;H0YN88;A0A075B716;H0YN73;H3BNC9	P08708;H0YN88;A0A075B716	40S ribosomal protein S17	RPS17
-0.133369	-0.2041	-0.250286	NaN	NaN	-0.12356			6	6	6	34.5	34.5	34.5	16.561	18.605	1904500000	1204300000	700220000	1.54034	-0.195918	0	-0.12356	P46776;E9PJD9;E9PLL6;E9PLX7	P46776;E9PJD9;E9PLL6	60S ribosomal protein L27a	RPL27A
-0.44134	-0.410179	-0.365444	-0.154121	-0.192348	-0.0414022	+		34	24	24	50.9	38.9	38.9	80.439	255.29	20688000000	13888000000	6800600000	2.53236	-0.405654	0.982965	-0.12929	H3BLZ8;Q92841;Q92841-1;Q92841-3;Q92841-2;A0A0U1RQJ0	H3BLZ8;Q92841;Q92841-1;Q92841-3;Q92841-2	Probable ATP-dependent RNA helicase DDX17	DDX17
NaN	NaN	NaN	-0.738626	1.03598	-0.687288			3	3	3	22.9	22.9	22.9	16.545	5.6921	25030000	13543000	11487000	0	NaN	0.0734942	-0.129979	P31431-2;P31431	P31431-2;P31431	Syndecan-4	SDC4
[truncated: 315 more rows]

## Sheet: table legend
Column	Description
[truncated: 20 more rows]
