# Supplementary material for: Full length RTN3 regulates turnover of tubular endoplasmic reticulum via selective autophagy
Source: eLife. 2017 Jun 15;6:e25555. doi: 10.7554/eLife.25555 (PMC5517149; doi:10.7554/eLife.25555)
Supplement: Figure 8—source data 1. — Comparison of the IP-interactomes analyses were performed using the SILAC-labeling strategy in U2OS after 24 hr treatment with 1 µg/ml of doxycycline. Bafilomycin A1, 200 ng/ml, was added for 2 hr. Peptides with Log2 (Heavy/Light [H/L]) ratios ≥1 and a p value ≤ 0.05 were considered significantly enriched. DOI: http://dx.doi.org/10.7554/eLife.25555.032 [file elife-25555-fig8-data1.xlsx]

## Sheet: Figure 8 – source data 1
log2 Ratio H(Fam134B)/ L (HA-empty vector control) normalized FAM134B_01	log2 Ratio H(Fam134B)/ L (HA-empty vector control) normalized FAM134B_02	log2 Ratio H(Fam134B)/ L (HA-empty vector control) normalized FAM134B_03	log2 Ratio H(RTN3B)/ L (HA-empty vector control) normalized RTN3B_01	log2 Ratio H(RTN3B)/ L (HA-empty vector control) normalized RTN3B_02	log2 Ratio H(RTN3B)/ L (HA-empty vector control) normalized RTN3B_03	T-test Significant_H/L normalized FAM134B	T-test Significant_H/L normalized RTN3B	Peptides	Razor + unique peptides	Unique peptides	Sequence coverage [%]	Unique + razor sequence coverage [%]	Unique sequence coverage [%]	Mol. weight [kDa]	Score	Intensity	Intensity L	Intensity H	-Log10 T-test p-value_H/L normalized FAM134B	log2 Ratio H (FAM134B)/ L (HA-empty vector control) normalized FAM134B	-Log10 T-test p-value_H/L normalized RTN3B	log2 Ratio H (RTN3B) /L (HA-empty vector control) normalized RTN3B	Protein IDs	Majority protein IDs	Protein names	Gene names
4.11512	4.06402	4.36135	4.15939	4.07433	4.20844	+	+	15	15	15	63.5	63.5	63.5	30.348	323.31	29657000000	1536300000	28120000000	3.29613	4.08016	4.02839	4.04739	A0A0A0MR02;P45880;P45880-2;P45880-1;Q5JSD2;Q5JSD1;A2A3S1	A0A0A0MR02;P45880;P45880-2;P45880-1;Q5JSD2;Q5JSD1	Voltage-dependent anion-selective channel protein 2	VDAC2
3.90728	3.88606	3.82782	5.62346	5.6716	5.59314	+	+	27	27	27	73.5	73.5	73.5	56.559	323.31	144640000000	7455900000	137180000000	4.40213	3.77372	4.76783	5.5294	P06576;H0YH81;F8W079;F8W0P7;H0YI37	P06576;H0YH81;F8W079	ATP synthase subunit beta, mitochondrial;ATP synthase subunit beta	ATP5B
3.45575	3.53306	3.43976	5.61241	5.46473	5.284	+	+	14	14	14	56.2	56.2	56.2	28.908	323.31	19877000000	871200000	19005000000	4.13784	3.37619	3.50238	5.35371	P24539;Q5QNZ2	P24539;Q5QNZ2	ATP synthase F(0) complex subunit B1, mitochondrial	ATP5F1
3.27696	3.37142	3.46336	3.92552	3.20945	3.58568	+	+	22	22	22	29	29	29	122.85	149.34	4785100000	680990000	4104100000	3.56768	3.27058	2.45274	3.47355	Q9BSJ8;Q9BSJ8-2;F8VZB1	Q9BSJ8;Q9BSJ8-2	Extended synaptotagmin-1	ESYT1
3.21844	3.35868	3.3029	3.35417	3.00135	3.3113	+	+	9	9	8	35.4	35.4	30.8	21.671	29.763	3696200000	352410000	3343700000	3.78803	3.19334	2.89793	3.12227	O00264;O00264-2	O00264;O00264-2	Membrane-associated progesterone receptor component 1	PGRMC1
3.17927	3.14535	3.28093	5.13365	5.10509	5.07318	+	+	37	37	37	68	68	68	59.75	323.31	153290000000	9514600000	143780000000	3.76347	3.10185	4.91433	5.00397	P25705;P25705-2;P25705-3;K7EK77;K7ERX7;K7ENJ4;K7EJP1;K7EQH4;K7ESA0	P25705;P25705-2;P25705-3	ATP synthase subunit alpha, mitochondrial	ATP5A1
3.87823	2.41587	3.29702	2.43928	2.20524	NaN			8	8	7	18.7	18.7	16.5	72.063	29.716	263760000	19563000	244200000	1.73698	3.09704	1.47505	2.22226	Q6P1M0;Q6P1M0-2	Q6P1M0	Long-chain fatty acid transport protein 4	SLC27A4
3.15921	3.17282	3.1437	3.07416	2.76634	2.43994	+	+	7	7	7	38.1	38.1	38.1	24.593	61.47	3069300000	353210000	2716100000	5.12124	3.05858	2.32746	2.66015	O75396;A0A087X1A9	O75396	Vesicle-trafficking protein SEC22b	SEC22B
3.35952	3.31683	2.64388	5.90987	5.96834	5.8531	+	+	2	2	2	8.3	8.3	8.3	21.862	3.9333	200840000000	5022800000	195820000000	2.22997	3.00674	4.48433	5.81044	A8MT72;Q2NKQ5;Q16799-3;Q16799-2;Q16799	A8MT72;Q2NKQ5;Q16799-3;Q16799-2;Q16799	Reticulon;Reticulon-1	RTN1
2.92096	3.48556	2.6615	3.09204	NaN	2.89714	+		7	7	7	23.3	23.3	23.3	30.772	23.131	2039200000	270360000	1768800000	2.1639	2.92267	1.6691	2.89459	P21796;C9JI87	P21796;C9JI87	Voltage-dependent anion-selective channel protein 1	VDAC1
2.40828	3.41061	2.9475	1.99592	4.18547	3.6663			5	5	5	31.2	31.2	31.2	21.127	33.845	1740200000	135930000	1604300000	1.98427	2.82213	1.39276	3.18256	Q5T8U5;O15260-2;O15260;O15260-3;B7Z1G8	Q5T8U5;O15260-2;O15260;O15260-3	Surfeit locus protein 4	SURF4
2.80002	2.65256	3.16551	3.62621	3.99521	3.59371	+	+	17	17	17	28.7	28.7	28.7	64.872	128.6	5389800000	619770000	4770000000	2.5214	2.77269	2.90307	3.63838	F5GZS6;J3KPF3;P08195-2;P08195-3;P08195;P08195-4;F5H0E2;H0YFS2;F5GZI0;F5H867;H0YFX4;F5GZR9	F5GZS6;J3KPF3;P08195-2;P08195-3;P08195;P08195-4	4F2 cell-surface antigen heavy chain	SLC3A2
2.8709	2.84302	2.81005	4.90881	3.4939	4.75596	+		15	15	15	83.2	83.2	83.2	18.491	73.756	7714200000	627000000	7087200000	4.38567	2.74132	1.968	4.28622	O75947;O75947-2;F5H608	O75947;O75947-2	ATP synthase subunit d, mitochondrial	ATP5H
2.83891	2.81975	2.61671	2.61351	3.14828	3.02684	+	+	11	11	11	31.2	31.2	31.2	48.799	79.222	2244900000	302280000	1942700000	3.14612	2.65846	2.48728	2.82954	A0A0C4DGS1;P39656-3;P39656;P39656-2;U3KQ84	A0A0C4DGS1;P39656-3;P39656;P39656-2;U3KQ84	Dolichyl-diphosphooligosaccharide--protein glycosyltransferase 48 kDa subunit	DDOST
2.88692	2.69122	2.6427	NaN	2.49339	2.78515	+		10	10	10	45.2	45.2	45.2	34.324	43.926	756160000	93182000	662980000	3.09781	2.64028	1.43731	2.53927	Q53GQ0;E9PI21;Q53GQ0-2	Q53GQ0;E9PI21	Very-long-chain 3-oxoacyl-CoA reductase	HSD17B12
2.64796	2.76065	2.68988	2.45885	2.75198	2.43397	+	+	13	13	13	55.7	55.7	55.7	29.702	121.69	6116900000	885010000	5231900000	3.79593	2.5995	2.76073	2.44827	Q9Y5M8;H7C4H2;C9J5Z8	Q9Y5M8;H7C4H2	Signal recognition particle receptor subunit beta	SRPRB
2.40316	2.60443	2.98756	3.88039	4.03615	3.92533	+	+	11	11	11	50.5	50.5	50.5	33.331	133.67	6074800000	622250000	5452500000	2.35305	2.56505	3.83953	3.84729	Q9Y6C9;E9PIE4	Q9Y6C9;E9PIE4	Mitochondrial carrier homolog 2	MTCH2
2.66923	2.59	2.62127	2.35896	2.23726	1.91418	+	+	11	11	11	47.8	47.8	47.8	29.804	48.382	2890500000	434880000	2455700000	4.08025	2.52683	2.38886	2.07013	P35232;C9JW96;C9JZ20;E7ESE2;E9PCW0;P35232-2;D6RBK0	P35232;C9JW96;C9JZ20;E7ESE2;E9PCW0	Prohibitin	PHB
2.29263	2.64761	2.77602	3.01012	3.08566	3.24182	+	+	9	9	9	35.6	35.6	35.6	27.978	43.13	6535800000	906850000	5628900000	2.46825	2.47209	3.29032	3.01253	P57088;D6RAA6;H0Y8N0;J3KN43;D6RBY2	P57088;D6RAA6	Transmembrane protein 33	TMEM33
2.1043	3.17382	2.32074	4.03378	4.10769	4.25882		+	5	5	5	12.4	12.4	12.4	56.598	31.16	591190000	39146000	552040000	1.75613	2.43295	3.56945	4.03343	Q15758;M0QXM4;Q15758-3;Q15758-2;M0QX44	Q15758;M0QXM4	Neutral amino acid transporter B(0);Amino acid transporter	SLC1A5
2.43808	2.6116	2.48058	1.95412	1.99186	2.93846	+		9	9	9	54.4	54.4	54.4	22.977	36.758	1052600000	274220000	778340000	3.32873	2.41008	1.68082	2.19481	Q9NP72;Q9NP72-2;A0A087X163;Q5W0J0;H0Y6T8;Q9NP72-3	Q9NP72;Q9NP72-2;A0A087X163;Q5W0J0;H0Y6T8	Ras-related protein Rab-18	RAB18
2.42035	2.55026	NaN	3.07075	NaN	3.22934			4	4	4	17.6	17.6	17.6	25.565	7.7918	334800000	43044000	291760000	1.76115	2.3853	1.78127	3.05005	P00403	P00403	Cytochrome c oxidase subunit 2	MT-CO2
2.44702	2.79335	2.10246	NaN	2.57352	2.5602	+	+	8	8	8	53.9	53.9	53.9	16.953	42.255	661020000	93417000	567600000	2.14628	2.34761	2.76484	2.46686	Q56VL3;D6RD77;J3KPI9;Q56VL3-2	Q56VL3	OCIA domain-containing protein 2	OCIAD2
2.50658	2.28777	2.51999	2.46905	3.35713	2.94066	+		5	5	5	17.3	17.3	17.3	45.786	21.548	1073100000	170980000	902080000	2.98513	2.33811	2.08826	2.82228	Q9Y679-2;Q9Y679;Q9Y679-3	Q9Y679-2;Q9Y679;Q9Y679-3	Ancient ubiquitous protein 1	AUP1
2.3307	2.60647	2.33391	3.77621	4.0009	3.80478	+	+	3	3	3	18.1	18.1	18.1	16.829	8.82	648880000	211650000	437230000	2.81155	2.32369	3.4529	3.76063	Q9NRP0;Q9NRP0-2;A0A087WUD3	Q9NRP0;Q9NRP0-2	Oligosaccharyltransferase complex subunit OSTC	OSTC
2.51992	2.44525	2.27849	2.56901	3.45194	2.8536	+		8	8	5	47.7	47.7	32.9	23.482	53.263	1810800000	269620000	1541200000	3.02259	2.31455	2.08696	2.85818	P51148;P51148-2;K7ERI8;K7ERQ8;F8VVK3;K7ENY4;F8VWU4;F8VVZ0;F8VUA5;K7EIP6;F8WCY6;F8WD79;F8VPW9;F8VSF8;F8VWZ7	P51148;P51148-2;K7ERI8;K7ERQ8;F8VVK3;K7ENY4	Ras-related protein Rab-5C	RAB5C
NaN	2.27083	2.5551	3.14701	2.93238	3.29134		+	7	7	7	17.2	17.2	17.2	52.764	39.42	1522900000	189090000	1333800000	1.40812	2.31297	2.9254	3.02358	Q96N66;Q96N66-3;Q96N66-2;A9C4B8;M0R1Z5;H7C2M4;C9J4E9;A0A0G2JNX6	Q96N66;Q96N66-3;Q96N66-2	Lysophospholipid acyltransferase 7	MBOAT7
2.22549	2.85764	2.12075	5.03342	6.16822	5.59652		+	8	8	8	58.9	58.9	58.9	19.325	128.99	2170700000	65061000	2105600000	2.00631	2.30129	2.45227	5.49939	J3KQ48;Q9Y3E5	J3KQ48;Q9Y3E5	Peptidyl-tRNA hydrolase 2, mitochondrial	PTRH2
2.61927	2.323	2.09798	3.15301	3.19857	3.47897	+	+	4	4	4	27.2	27.2	27.2	17.033	9.4952	1112000000	139150000	972870000	2.34836	2.24675	2.98821	3.17685	B4E1G1;Q9BUN8-2;Q9BUN8;E5RGY0	B4E1G1;Q9BUN8-2;Q9BUN8;E5RGY0	Derlin-1	DERL1
2.48949	2.288	2.23882	2.92964	2.70666	3.16673	+	+	24	24	24	53	53	53	68.569	218.3	11540000000	1770200000	9770200000	2.93135	2.23877	2.65973	2.83434	P04843;B7Z4L4;F8WF32	P04843;B7Z4L4	Dolichyl-diphosphooligosaccharide--protein glycosyltransferase subunit 1	RPN1
2.50736	2.46775	1.76511	1.24428	1.27911	1.71594			5	5	2	43.2	43.2	16	18.483	27.17	1441400000	290380000	1151000000	1.90734	2.14674	1.88296	1.31311	E9PLD0;Q9H0U4;A0A087WTI1;Q92928;H0YLJ8;H0YL94;H0YMN7;H0YNE9;Q92930;P61006-2;P61006;P59190-2;P59190	E9PLD0;Q9H0U4;A0A087WTI1;Q92928	Ras-related protein Rab-1B;Putative Ras-related protein Rab-1C	RAB1B;RAB1C
2.07187	2.36527	2.27504	2.71782	NaN	2.53943	+		4	4	4	19.2	19.2	19.2	27.079	14.013	493810000	72364000	421450000	2.78414	2.13739	1.64884	2.52863	J9JIE6;Q9UM00-2;Q9UM00;J3QQY2;J3KS45;J3KTQ7	J9JIE6;Q9UM00-2;Q9UM00;J3QQY2;J3KS45	Transmembrane and coiled-coil domain-containing protein 1	TMCO1
1.50503	2.46921	2.5888	3.21909	3.04611	2.55181		+	6	6	6	33	33	33	23.881	11.543	973170000	199210000	773960000	1.58574	2.08768	2.30778	2.839	Q8TED1;E7ETY7;J3KNB5	Q8TED1;E7ETY7	Probable glutathione peroxidase 8;Glutathione peroxidase	GPX8
2.1042	2.25223	2.16253	3.22922	3.08345	2.78132	+	+	4	4	4	52.6	52.6	52.6	8.4518	22.677	651540000	112380000	539160000	3.36549	2.07299	2.69497	2.93133	E9PN17;O75964	E9PN17;O75964	ATP synthase subunit g, mitochondrial	ATP5L
2.08563	2.24699	NaN	6.16649	5.75371	6.29589		+	14	14	2	70.8	70.8	4	40.317	295.49	54500000000	1870200000	52630000000	1.60478	2.06631	3.12578	5.97203	Q9NQC3-2;F8W914	Q9NQC3-2;F8W914	Reticulon-4;Reticulon	RTN4
2.45267	2.31655	1.72522	1.20439	1.15205	1.19919		+	8	8	8	27	27	27	45.796	43.916	1012800000	379090000	633690000	1.93959	2.06481	3.62855	1.08521	A0A087X2I1;P62333;H0YJC0;H0YJS8;H0YJX2;H0YJE9;H0YJT1	A0A087X2I1;P62333;H0YJC0	26S protease regulatory subunit 10B	PSMC6
2.02882	2.21819	2.10296	1.65178	1.58895	1.54735	+	+	9	9	6	35.3	35.3	26.3	38.925	42.35	5125400000	3521400000	1604000000	3.12752	2.01666	3.38578	1.49602	O75477;B0QZ43	O75477;B0QZ43	Erlin-1	ERLIN1
1.87397	2.10986	2.27193	1.70159	1.92323	1.66812	+	+	17	17	17	28.1	28.1	28.1	85.605	67.46	2141600000	404020000	1737500000	2.47238	1.98526	2.63734	1.66431	Q13200-3;Q13200;Q13200-2;H7C1H2;H7C2Q3	Q13200-3;Q13200;Q13200-2	26S proteasome non-ATPase regulatory subunit 2	PSMD2
1.84451	2.55981	1.83499	2.44374	2.70695	2.78526		+	4	4	4	13.5	13.5	13.5	34.114	10.937	908860000	177830000	731030000	1.84213	1.97977	2.78442	2.54532	O95159;E9PQA5;E9PQ47;E9PNY1;H0YCU8;E9PMQ3	O95159;E9PQA5;E9PQ47;E9PNY1	Zinc finger protein-like 1	ZFPL1
2.08124	2.12456	2.01639	1.64764	1.61405	1.44074	+	+	12	12	12	49.3	49.3	49.3	33.239	83.155	2573400000	731810000	1841600000	3.59616	1.97406	2.72059	1.46748	J3KPX7;Q99623;F5GY37;Q99623-2;F5GWA7;F5H3X6;F5H0C5;F5H2D2	J3KPX7;Q99623;F5GY37;Q99623-2;F5GWA7;F5H3X6	Prohibitin-2	PHB2
1.97089	2.20702	2.03924	2.1413	1.79764	2.05547	+	+	20	2	2	56	5.3	5.3	49.959	12.7	1150800000	231100000	919680000	2.89876	1.97238	2.53065	1.89814	Q13748;Q13748-2;Q6PEY2	Q13748;Q13748-2;Q6PEY2	Tubulin alpha-3C/D chain;Tubulin alpha-3E chain	TUBA3C;TUBA3E
2.16363	1.95554	NaN	3.69265	2.37134	4.04221			3	3	3	13.7	13.7	13.7	24.976	8.855	464190000	168020000	296170000	1.47147	1.95958	1.6311	3.26873	P49755;G3V2K7	P49755;G3V2K7	Transmembrane emp24 domain-containing protein 10	TMED10
1.89332	2.12849	2.09727	1.7726	1.55395	1.34613	+		17	17	17	87.3	87.3	87.3	22.782	119.35	16079000000	3793300000	12285000000	2.84101	1.9397	2.15119	1.45756	P04792;F8WE04;C9J3N8	P04792;F8WE04	Heat shock protein beta-1	HSPB1
2.01403	2.03471	2.04635	2.10148	1.98006	1.72788	+	+	3	3	3	21.6	21.6	21.6	31.362	41.91	1985900000	436180000	1549700000	4.62104	1.9317	2.44727	1.83647	Q07021;I3L3Q7;I3L3B0	Q07021;I3L3Q7;I3L3B0	Complement component 1 Q subcomponent-binding protein, mitochondrial	C1QBP
2.03238	2.01157	1.86223	1.35789	1.48666	1.38979	+	+	8	8	8	43.2	43.2	43.2	26.411	43.663	1447100000	308800000	1138300000	3.08554	1.86873	3.06022	1.31145	P28066;P28066-2	P28066;P28066-2	Proteasome subunit alpha type-5	PSMA5
2.03083	1.98641	1.88253	3.16034	2.68192	3.28986	+	+	7	7	7	16.2	16.2	16.2	49.436	15.376	1433100000	208310000	1224800000	3.25666	1.86659	2.40667	2.94404	Q3LIE7;Q15392-2;Q15392;H7C4B7	Q3LIE7;Q15392-2;Q15392	Delta(24)-sterol reductase	Nbla03646;DHCR24
1.87109	1.91069	2.0896	4.2442	4.0757	3.98787	+	+	11	11	11	66.2	66.2	66.2	23.277	88.247	20375000000	2317200000	18058000000	2.88361	1.85713	3.45237	4.00259	P48047;H7C0C1;H7C086;H7C068	P48047;H7C0C1	ATP synthase subunit O, mitochondrial	ATP5O
1.79311	2.26769	1.75818	3.2301	2.14545	3.20852			26	26	14	32.3	32.3	16.8	109.55	179.38	9785500000	3491300000	6294200000	2.10323	1.83966	1.78525	2.76135	P05023-3;P05023-4;P05023;P05023-2;M0R116;A0A0A0MT26;P13637;P13637-2;P13637-3;Q5TC01;Q5TC02	P05023-3;P05023-4;P05023;P05023-2	Sodium/potassium-transporting ATPase subunit alpha-1	ATP1A1
1.85834	2.2711	1.60729	5.86451	5.85514	5.82199		+	95	95	87	75.1	75.1	66.4	110.65	323.31	3887000000000	93524000000	3793500000000	1.95038	1.81224	5.29787	5.74721	O95197-2;O95197;O95197-7;F5H891;F5GWG7;O95197-4;F5H617	O95197-2;O95197;O95197-7	Reticulon-3	RTN3
1.92964	1.92858	1.81389	3.40504	2.76384	2.69599	+	+	6	5	5	23.3	17.4	17.4	35.619	20.751	919070000	144910000	774160000	3.33754	1.7907	2.20745	2.85496	Q9H9B4;D6RFI0;D6RDG7;S4R2X2;D6RAE9	Q9H9B4;D6RFI0;D6RDG7;S4R2X2	Sideroflexin-1	SFXN1
1.79942	1.93108	1.93312	3.33942	NaN	3.08897	+		3	3	3	44.8	44.8	44.8	6.4575	29.021	499800000	89143000	410660000	3.21363	1.78787	1.59201	3.1142	Q96IX5	Q96IX5	Up-regulated during skeletal muscle growth protein 5	USMG5
1.91781	2.11333	1.61758	1.5429	1.0481	1.33925	+		6	6	5	20.1	20.1	17.1	44.784	46.111	618290000	97842000	520450000	2.18873	1.78291	1.86049	1.21008	P62195-2;P62195;J3QQM1;J3QLH6;J3KRP2;J3QSA9;J3QRR3;J3QRW1;J3QSE0	P62195-2;P62195;J3QQM1;J3QLH6;J3KRP2;J3QSA9	26S protease regulatory subunit 8	PSMC5
1.91142	1.81668	1.90997	1.60255	0.945758	1.56301	+		4	4	4	16.2	16.2	16.2	49.512	51.965	1699600000	440560000	1259000000	3.50852	1.77936	1.57038	1.27044	O14929;O14929-2	O14929;O14929-2	Histone acetyltransferase type B catalytic subunit	HAT1
1.82713	1.82875	1.91518	2.42763	2.48189	2.4079	+	+	14	14	14	41.8	41.8	41.8	39.958	57.766	11132000000	1797700000	9333800000	3.56247	1.75702	4.04851	2.33914	Q00325-2;Q00325;F8VVM2;F8VWQ0;F8VZL5;F8VWR4	Q00325-2;Q00325;F8VVM2	Phosphate carrier protein, mitochondrial	SLC25A3
1.70761	1.86188	1.90223	2.3907	2.40026	2.14991	+	+	13	13	12	55.8	55.8	55.8	27.893	113.73	18202000000	4771100000	13431000000	2.92766	1.72391	2.8645	2.21362	Q9P0L0;Q9P0L0-2;J3QKM9	Q9P0L0;Q9P0L0-2	Vesicle-associated membrane protein-associated protein A	VAPA
1.75403	1.66762	1.96625	2.59994	2.7006	2.61457	+	+	9	9	9	24.6	24.6	24.6	43.159	69.317	3855300000	628410000	3226900000	2.56458	1.69597	3.81536	2.53837	Q9P035;H3BS72;H3BPZ1;Q9P035-2;H3BRL8;H3BMZ1	Q9P035;H3BS72;H3BPZ1;Q9P035-2	Very-long-chain (3R)-3-hydroxyacyl-CoA dehydratase 3	HACD3
1.65159	1.82558	1.89076	2.06698	2.0597	1.97809	+	+	7	7	7	26.5	26.5	26.5	35.422	71.879	3405600000	1097500000	2308100000	2.74938	1.68931	3.66388	1.93492	P08574	P08574	Cytochrome c1, heme protein, mitochondrial	CYC1
2.02531	1.51949	1.64883	1.7458	1.71348	NaN		+	5	5	4	10.8	10.8	8.9	66.558	11.258	110250000	15899000	94354000	2.06855	1.63121	2.19977	1.62964	P08240-2;P08240	P08240-2;P08240	Signal recognition particle receptor subunit alpha	SRPR
1.88092	1.39977	1.88764	1.9293	1.87892	1.83301		+	10	9	9	51	51	51	27.228	36.901	3121600000	729880000	2391700000	2.01049	1.62278	3.61293	1.78041	O95292;E5RK64;O95292-2	O95292	Vesicle-associated membrane protein-associated protein B/C	VAPB
1.70239	1.73088	1.69626	1.49472	1.44483	1.36955	+	+	25	25	25	53.2	53.2	53.2	66.022	323.31	16085000000	3832700000	12252000000	4.35764	1.60984	3.13059	1.33637	Q07065;H3BUW6;H3BN64;H3BRM1;H3BRF9;Q96K21-4;Q96K21-3;Q96K21-2;Q96K21	Q07065	Cytoskeleton-associated protein 4	CKAP4
1.68979	1.63594	1.68455	1.81258	2.14649	2.0497	+	+	3	3	3	37.5	37.5	37.5	9.9743	25.094	2509300000	588650000	1920700000	3.92372	1.57009	2.56768	1.90292	P60468;S4R3B5	P60468	Protein transport protein Sec61 subunit beta	SEC61B
1.45022	1.78094	1.7257	3.47884	3.48388	3.61483	+	+	12	12	1	35.2	35.2	4.4	32.996	66.987	14540000000	2484500000	12055000000	2.36515	1.55229	3.77268	3.42585	P36542	P36542	ATP synthase subunit gamma, mitochondrial	ATP5C1
1.7761	1.55944	1.60421	3.22845	NaN	3.06948	+		5	5	5	31.6	31.6	31.6	21.943	21.889	401410000	84327000	317080000	2.74038	1.54659	1.78008	3.04896	O14925;Q5SRD1;B4DDK6	O14925;Q5SRD1	Mitochondrial import inner membrane translocase subunit Tim23;Putative mitochondrial import inner membrane translocase subunit Tim23B	TIMM23;TIMM23B
1.56164	1.65942	1.69853	1.55856	1.63738	1.63185	+	+	21	11	9	63	41.5	36.8	49.857	219.5	8458300000	2864600000	5593700000	3.15607	1.53987	3.54801	1.50926	Q9BUF5;K7ESM5;K7EL29;K7EN98;K7ESQ3;K7EQT3;K7EJ64;K7ERA8;K7EJZ4;K7ES63;K7EPE5	Q9BUF5;K7ESM5	Tubulin beta-6 chain	TUBB6
1.67762	1.51384	1.72159	1.8352	2.5929	2.52158	+		10	10	9	14.8	14.8	13.8	88.583	34.396	1003500000	266820000	736670000	2.77329	1.53769	1.93296	2.21656	Q9Y4W6;K7EP56	Q9Y4W6	AFG3-like protein 2	AFG3L2
1.59636	1.51702	1.76073	1.57134	1.26285	1.51561	+	+	21	2	0	56.8	5.9	0	49.585	50.146	1778600000	496660000	1281900000	2.65598	1.52471	2.30918	1.34993	P04350;M0QYM7;M0R278;M0R042;M0R1I1	P04350	Tubulin beta-4A chain	TUBB4A
1.56793	1.48006	1.81283	1.49436	1.7745	1.70523	+	+	8	8	8	14	14	14	70.702	41.706	4241400000	1031600000	3209800000	2.37043	1.52027	2.536	1.55803	Q14739;C9JXK0;C9JES9	Q14739;C9JXK0	Lamin-B receptor	LBR
1.53421	1.75698	1.51884	1.84531	2.4401	2.32731	+		5	5	5	12.8	12.8	12.8	57.206	22.663	559280000	122360000	436920000	2.58344	1.50334	2.12902	2.10424	P30837	P30837	Aldehyde dehydrogenase X, mitochondrial	ALDH1B1
1.55326	1.58938	1.5434	1.84435	1.45386	1.60041	+	+	9	7	7	49.1	40.7	40.7	24.336	51.688	5642600000	1927200000	3715500000	4.03915	1.46201	2.26165	1.53287	P31947-2;P31947	P31947-2;P31947	14-3-3 protein sigma	SFN
1.23026	1.79031	1.63459	1.60322	1.55129	NaN			11	11	11	14.5	14.5	14.5	118.71	52.191	348120000	92809000	255310000	1.88738	1.45172	1.9513	1.47726	Q8TEX9;Q8TEX9-2;H0YN14;H0YLV0;H0YL92;H0YK93;H0YKG5;H0YN07;H0YMR4	Q8TEX9;Q8TEX9-2;H0YN14	Importin-4	IPO4
1.44927	1.53575	1.65659	1.74395	NaN	1.9611	+		3	3	3	12.8	12.8	12.8	29.573	11.685	901850000	217870000	683990000	2.76414	1.4472	1.40459	1.75253	C9J3L8;C9J5W0;E9PAL7;C9IZQ1;P43307;P43307-2	C9J3L8;C9J5W0;E9PAL7;C9IZQ1;P43307;P43307-2	Translocon-associated protein subunit alpha	SSR1
1.60041	1.5612	1.40474	2.17447	2.15575	2.14802	+	+	8	8	8	36	36	36	30.241	35.56	603300000	142410000	460890000	2.75404	1.42212	4.83758	2.05941	O75489;E9PS48;O75489-2;E9PKL8;G3V194	O75489	NADH dehydrogenase [ubiquinone] iron-sulfur protein 3, mitochondrial	NDUFS3
1.4782	1.55474	1.41873	NaN	2.3374	2.67333	+		6	6	6	19.8	19.8	19.8	28.202	13.085	489890000	106510000	383380000	3.09251	1.38389	1.35278	2.40536	Q9BVV7;J3QRI1	Q9BVV7;J3QRI1	Mitochondrial import inner membrane translocase subunit Tim21	TIMM21
1.56208	1.50508	1.34931	1.58029	1.66894	1.54176	+	+	8	8	8	46.4	46.4	46.4	27.887	42.949	619780000	141210000	478570000	2.66942	1.37216	3.19932	1.497	O14818;O14818-2;H0Y586;Q8TAA3-2;Q8TAA3-5;Q8TAA3;A0A087WYS6;O14818-4;F5GY34	O14818;O14818-2;H0Y586;Q8TAA3-2;Q8TAA3-5;Q8TAA3	Proteasome subunit alpha type-7;Proteasome subunit alpha type-7-like	PSMA7;PSMA8
1.42159	1.44578	1.46895	1.26885	1.26454	1.03019	+	+	18	18	18	69.3	69.3	69.3	29.926	300.73	221180000000	70457000000	150720000000	3.98606	1.34544	2.28302	1.08786	Q13268;C9JZP6;Q13268-2;H0YJG9;H0YJP4	Q13268;C9JZP6;Q13268-2;H0YJG9;H0YJP4	Dehydrogenase/reductase SDR family member 2, mitochondrial	DHRS2
1.3734	1.43007	1.20677	2.98796	2.85625	3.19342	+	+	5	5	2	63.7	63.7	18.7	9.8402	19.44	601500000	129130000	472370000	2.53411	1.23675	2.94588	2.91254	C9J0J7;G5E9Q6;P35080-2;C9JQ45;C9J2N0	C9J0J7;G5E9Q6;P35080-2;C9JQ45	Profilin;Profilin-2	PFN2
1.11916	1.49912	1.31179	2.32043	2.21369	2.15218		+	2	2	2	15.2	15.2	15.2	26.925	47.639	432950000	94420000	338530000	2.09057	1.21002	3.27357	2.12877	E9PG39;E9PC15;Q53H12	E9PG39;E9PC15;Q53H12	Acylglycerol kinase, mitochondrial	AGK
1.15303	1.17568	1.56008	2.3764	2.24175	1.94002		+	16	16	16	48.8	48.8	48.8	48.442	134.97	4106000000	1047900000	3058100000	1.9219	1.19626	2.41986	2.08606	P22695;H3BRG4;H3BSJ9;H3BP04;H3BUE4;H3BUI9;A0A087WVZ4	P22695;H3BRG4;H3BSJ9;H3BP04	Cytochrome b-c1 complex subunit 2, mitochondrial	UQCRC2
1.22749	0.941632	1.59841	2.0545	2.05001	1.8819		+	16	5	5	56.7	25.5	25.5	32.866	103.31	1705200000	444870000	1260300000	1.58492	1.15585	3.04731	1.89547	P12236;P12235;V9GYG0;Q9H0C2	P12236;P12235	ADP/ATP translocase 3;ADP/ATP translocase 3, N-terminally processed;ADP/ATP translocase 1	SLC25A6;SLC25A4
1.33645	1.04061	1.38128	2.65244	2.50894	2.76653		+	16	16	16	16.5	16.5	16.5	138.34	43.891	1057900000	209170000	848720000	2.07132	1.15278	3.06655	2.54264	P53621;P53621-2	P53621;P53621-2	Coatomer subunit alpha;Xenin;Proxenin	COPA
1.21394	1.23248	NaN	1.53749	2.73548	2.37818	+		8	8	8	51.3	51.3	51.3	22.391	48.827	424530000	268110000	156420000	2.27955	1.12321	1.56866	2.11705	P37802;P37802-2;X6RJP6;C9J5W6;Q9UI15	P37802;P37802-2;X6RJP6	Transgelin-2	TAGLN2
1.0383	1.07505	1.51051	1.39682	1.52421	1.35873		+	22	22	2	58.1	58.1	3.1	50.151	323.31	104620000000	31142000000	73482000000	1.73936	1.10795	2.84784	1.32659	P68363;P68366-2;P68366;P68363-2;C9JDS9	P68363;P68366-2;P68366;P68363-2	Tubulin alpha-1B chain;Tubulin alpha-4A chain	TUBA1B;TUBA4A
1.17383	1.47457	0.890797	1.29472	2.39342	2.16337			7	7	7	42	42	42	25.035	66.039	935050000	562970000	372080000	1.62873	1.07973	1.50634	1.8505	P30041	P30041	Peroxiredoxin-6	PRDX6
1.03823	1.22324	1.27769	1.94673	1.98229	2.01428	+	+	15	15	15	56.4	56.4	56.4	44.868	141.79	10616000000	3027300000	7588400000	2.34922	1.07972	3.96838	1.8811	P31689;P31689-2	P31689;P31689-2	DnaJ homolog subfamily A member 1	DNAJA1
1.20633	1.13704	1.18523	1.61744	1.74507	1.48342	+	+	11	11	11	58.8	58.8	58.8	23.772	131.32	10644000000	3315500000	7328100000	3.44033	1.0762	2.60627	1.51531	O95816;O95816-2	O95816;O95816-2	BAG family molecular chaperone regulator 2	BAG2
1.1891	1.12228	1.20739	1.83919	1.87464	1.9355	+	+	18	18	7	48	48	19.8	32.852	70.923	128040000000	36093000000	91946000000	3.23598	1.07292	3.60445	1.78311	P05141	P05141	ADP/ATP translocase 2;ADP/ATP translocase 2, N-terminally processed	SLC25A5
1.18599	1.05102	1.26921	1.20552	1.39265	0.961549	+		7	6	6	45	45	45	16.32	25.736	3312700000	1006900000	2305800000	2.45349	1.06874	1.88813	1.08657	O15511;B1ALC0;O15511-2	O15511;B1ALC0;O15511-2	Actin-related protein 2/3 complex subunit 5	ARPC5
1.0708	1.10789	1.3225	3.02373	2.88237	NaN	+		8	8	8	11.1	11.1	11.1	111.82	28.786	266190000	49831000	216360000	2.27066	1.06707	1.80221	2.85305	E5KLK1;E5KLJ6;E5KLJ9;E5KLJ5;O60313;O60313-2	E5KLK1;E5KLJ6;E5KLJ9;E5KLJ5;O60313;O60313-2	Dynamin-like 120 kDa protein, mitochondrial;Dynamin-like 120 kDa protein, form S1	OPA1
1.07813	1.07629	1.30106	1.18161	1.2122	1.18047	+	+	27	27	1	67	67	2.7	49.83	323.31	103990000000	33819000000	70168000000	2.30145	1.05183	4.04274	1.09142	P68371;A6NNZ2;M0R2D3;M0QY85;CON__ENSEMBL:ENSBTAP00000025008;Q9H4B7;M0R0X0;M0QY37;M0QX14;M0QZL7;M0R2T4;A0A075B724	P68371	Tubulin beta-4B chain	TUBB4B
0.957469	1.23401	1.16704	2.27712	2.2185	2.28205	+	+	14	14	10	27.6	27.6	21.5	74.175	40.359	1043600000	236990000	806640000	2.17988	1.01951	4.0489	2.15923	Q9UJS0;Q9UJS0-2;R4GN64	Q9UJS0;Q9UJS0-2	Calcium-binding mitochondrial carrier protein Aralar2	SLC25A13
1.16079	1.10326	1.06461	1.32889	1.31377	1.36362	+	+	108	108	108	29.8	29.8	29.8	469.08	323.31	22474000000	7757900000	14716000000	3.11619	1.00955	3.84573	1.23543	P78527;P78527-2;F5GX40;H0YG84	P78527;P78527-2	DNA-dependent protein kinase catalytic subunit	PRKDC
4.2558	4.32287	4.4769	NaN	NaN	NaN	+		5	5	5	53.3	53.3	53.3	9.0115	12.635	9077200000	331680000	8745500000	3.62548	4.25186	0	NaN	H3BTL1;Q9GZQ8;A6NCE7;Q9H492;Q9H492-2;H3BTE7	H3BTL1;Q9GZQ8;A6NCE7;Q9H492;Q9H492-2	Microtubule-associated proteins 1A/1B light chain 3B;Microtubule-associated proteins 1A/1B light chain 3 beta 2;Microtubule-associated proteins 1A/1B light chain 3A	MAP1LC3B;MAP1LC3B2;MAP1LC3A
5.0778	3.80064	3.89627	NaN	NaN	NaN			9	9	9	37.7	37.7	37.7	35.386	50.786	2519000000	95118000	2423900000	2.01705	4.15824	0	NaN	Q8TC12;Q8TC12-2;G3V2G6;G3V234;H0YJ46;Q8TC12-3;H0YIZ8;H0YJ10	Q8TC12;Q8TC12-2;G3V2G6;G3V234;H0YJ46;Q8TC12-3	Retinol dehydrogenase 11	RDH11
4.15332	4.29866	3.97141	NaN	NaN	NaN	+		19	19	19	37.6	37.6	37.6	54.68	323.31	143170000000	6165100000	137000000000	3.26097	4.04113	0	NaN	Q9H6L5;Q9H6L5-2;H0Y9U4	Q9H6L5	Protein FAM134B	FAM134B
5.84922	2.99706	3.3717	-3.75378	NaN	NaN			11	11	8	78.3	78.3	63.1	22.367	131.4	3072900000	626260000	2446700000	1.32628	3.97266	0	-3.85378	Q9NR31;Q9NR31-2;H0Y5E8;Q5SQT8;X1WI22	Q9NR31;Q9NR31-2	GTP-binding protein SAR1a	SAR1A
NaN	3.65065	4.2025	NaN	NaN	NaN			5	5	5	20.6	20.6	20.6	21.493	13.951	384750000	8875000	375880000	1.33889	3.82657	0	NaN	Q00765;E2QRG8;B7Z332;B7Z510;H0Y8J8;Q00765-2	Q00765	Receptor expression-enhancing protein 5	REEP5
3.61965	3.40626	3.60893	NaN	3.05728	NaN	+		7	6	6	30	26	26	23.818	26.403	679570000	42490000	637080000	3.39178	3.44495	0	2.95728	O15173;O15173-2;U3KQM0;D3DNX8	O15173;O15173-2	Membrane-associated progesterone receptor component 2	PGRMC2
3.3512	3.31963	3.5493	NaN	2.98887	NaN	+		6	5	5	41.9	35.9	35.9	13.667	16.078	265510000	20300000	245210000	3.32596	3.30671	0	2.88887	P60520;H3BSM5;H3BQ50	P60520;H3BSM5;H3BQ50	Gamma-aminobutyric acid receptor-associated protein-like 2	GABARAPL2
NaN	3.56621	3.23521	NaN	NaN	NaN			3	3	3	20.8	20.8	20.8	19.258	7.872	173190000	12825000	160360000	1.49629	3.30071	0	NaN	O60831;A6NM71;A6NP52	O60831;A6NM71	PRA1 family protein 2	PRAF2
NaN	3.47002	3.32927	NaN	NaN	NaN			8	2	2	27.8	7.6	7.6	27.168	5.5937	615850000	25132000	590720000	1.86724	3.29964	0	NaN	H3BN98;H3BPJ2;Q15041-2;Q15041;Q15041-3	H3BN98
3.11387	3.02432	2.93121	NaN	5.39619	NaN	+		3	3	3	16.5	16.5	16.5	26.352	9.1129	443960000	29002000	414960000	3.48776	2.92313	0	5.29619	Q15125;C9J719;C9JJ78	Q15125;C9J719;C9JJ78	3-beta-hydroxysteroid-Delta(8),Delta(7)-isomerase	EBP
2.85362	2.74988	3.37212	NaN	NaN	NaN	+		5	5	5	12.6	12.6	12.6	49.966	10.656	365510000	33698000	331810000	2.35652	2.89187	0	NaN	P18031;B4DSN5	P18031;B4DSN5	Tyrosine-protein phosphatase non-receptor type 1;Tyrosine-protein phosphatase non-receptor type	PTPN1
2.44063	2.65951	3.6581	1.19264	1.33811	0.593593			9	9	3	63.5	63.5	19.1	20.471	62.739	10225000000	1235600000	8989900000	1.76426	2.81941	1.26861	0.941446	Q03135;E9PCT5	Q03135;E9PCT5	Caveolin-1;Caveolin	CAV1
3.02648	2.76156	2.80405	2.44233	NaN	2.05196	+		9	9	9	15.4	15.4	15.4	67.567	27.277	1329900000	141360000	1188600000	3.05449	2.76403	1.23873	2.14715	P27824;P27824-2;P27824-3;H0Y9Q7;D6RAU8;D6RB85;D6RDP7;D6RGY2;D6RAQ8;D6RFL1;D6RHJ3;D6RD16;H0Y9H1	P27824;P27824-2;P27824-3	Calnexin	CANX
2.69459	2.83508	NaN	NaN	NaN	2.61287			5	5	5	35.6	35.6	35.6	15.278	11.584	149240000	19213000	130030000	1.77529	2.66483	0	2.51287	Q8N5K1;I3L1N9;D6RCF4	Q8N5K1;I3L1N9	CDGSH iron-sulfur domain-containing protein 2	CISD2
2.73528	2.5569	2.88031	0.262553	NaN	1.87845	+		10	6	6	65.6	35.6	35.6	20.511	19.197	1341400000	173160000	1168300000	2.89692	2.62416	0.354604	0.970502	P18085;C9JPM4;C9JAK5;U3KQF2	P18085;C9JPM4;C9JAK5	ADP-ribosylation factor 4	ARF4
2.26273	2.90319	2.45525	0.645702	2.66453	3.11357	+		26	26	21	32.9	32.9	26.2	114.76	156.22	4913200000	627490000	4285700000	2.2226	2.44039	0.939706	2.04127	P16615;P16615-5;P16615-2;P16615-3;H7C5W9;P16615-4;O14983-2;O14983;O14983-3;A0A0C4DH86;H3BVB2;H3BTW4	P16615;P16615-5;P16615-2;P16615-3;H7C5W9;P16615-4	Sarcoplasmic/endoplasmic reticulum calcium ATPase 2	ATP2A2
2.36474	2.64835	2.43055	NaN	NaN	NaN	+		12	12	12	36.3	36.3	36.3	58.772	175.73	2600800000	152780000	2448000000	2.88848	2.38121	0	NaN	F5H6I7;Q6DD88;F5GWF8	F5H6I7;Q6DD88	Atlastin-3	ATL3
2.31319	2.55262	2.47514	NaN	NaN	NaN	+		3	3	3	8.7	8.7	8.7	62.924	19.884	299930000	38999000	260930000	3.04476	2.34698	0	NaN	O15270	O15270	Serine palmitoyltransferase 2	SPTLC2
1.61009	2.40705	3.27784	NaN	NaN	NaN			7	7	7	8.2	8.2	8.2	101.31	19.933	406750000	58135000	348610000	1.39673	2.33166	0	NaN	Q92973-2;Q92973;Q92973-3;A0A075B780;O14787-2;O14787;E7EW37;K7ENW1;K7ESC1;S4R398	Q92973-2;Q92973;Q92973-3	Transportin-1	TNPO1
2.99048	2.48834	1.63645	NaN	2.11177	NaN			11	11	11	61.5	61.5	61.5	22.456	36.682	1141300000	252040000	889270000	1.53828	2.27176	0	2.01177	Q99653;H0YNG9;H0YLY7;H0YKE7;F5GX29	Q99653;H0YNG9;H0YLY7;H0YKE7;F5GX29	Calcineurin B homologous protein 1	CHP1
2.48954	2.02974	2.55792	NaN	1.20119	NaN	+		5	5	5	14.2	14.2	14.2	47.463	21.944	443230000	87666000	355560000	2.27195	2.25907	0	1.10119	O00231;O00231-2;J3QRY4	O00231;O00231-2	26S proteasome non-ATPase regulatory subunit 11	PSMD11
2.38824	NaN	2.29936	NaN	NaN	NaN			6	6	6	37.7	37.7	37.7	23.339	36.362	158210000	14221000	143990000	1.89937	2.2438	0	NaN	Q86YS6;C9JFM7;Q86YS6-2	Q86YS6	Ras-related protein Rab-43	RAB43
2.44411	2.23395	NaN	NaN	NaN	NaN			3	3	3	13.9	13.9	13.9	52.623	42.503	527120000	51724000	475390000	1.52498	2.23903	0	NaN	Q96CS3	Q96CS3	FAS-associated factor 2	FAF2
2.44845	2.23625	2.32207	-1.47939	1.05255	0.836732	+		7	7	7	33.7	33.7	33.7	28.147	19.209	744110000	241930000	502190000	3.1197	2.23559	0.0141004	0.0366318	G3V5Z7;P60900;G3V3I1;G3V295;G3V3U4;P60900-2;P60900-3;G3V4S5;G3V2S7;H0YJC4	G3V5Z7;P60900;G3V3I1;G3V295;G3V3U4;P60900-2	Proteasome subunit alpha type;Proteasome subunit alpha type-6	PSMA6
2.22518	2.40708	NaN	NaN	NaN	NaN			5	5	5	31.2	31.2	31.2	21.229	10.373	151350000	26118000	125230000	1.58316	2.21613	0	NaN	P01111;P01116-2;P01112;P01116;G3V4K2;G3V5T7;P01112-2	P01111	GTPase NRas	NRAS
1.77674	2.72153	2.43595	NaN	NaN	1.37329			6	6	6	31.6	31.6	31.6	29.555	19.796	616040000	181510000	434530000	1.80605	2.2114	0	1.27329	P25786;P25786-2;F5GX11;B4DEV8	P25786;P25786-2;F5GX11;B4DEV8	Proteasome subunit alpha type-1;Proteasome subunit alpha type	PSMA1
2.12294	2.34537	NaN	NaN	NaN	NaN			2	2	2	12.6	12.6	12.6	16.854	3.669	19108000	2552700	16556000	1.47957	2.13415	0	NaN	F8WDH1;P56557;F8WBF4;C9K0I4	F8WDH1;P56557;F8WBF4;C9K0I4	Transmembrane protein 50B	TMEM50B
1.86017	2.39048	2.39226	1.12565	1.06102	NaN	+		8	8	8	30.5	30.5	30.5	44.323	108.57	865990000	126020000	739970000	2.1586	2.1143	1.68393	0.993333	E9PM69;R4GNH3;P17980;E9PMD8;E9PKD5;E9PN50;E9PLG2	E9PM69;R4GNH3;P17980;E9PMD8;E9PKD5;E9PN50	26S protease regulatory subunit 6A	PSMC3
2.08733	2.0993	2.42728	NaN	NaN	NaN	+		4	4	4	15.8	15.8	15.8	45.524	15.896	1069900000	141320000	928620000	2.55457	2.10464	0	NaN	O95864-3;O95864;O95864-4;O95864-2	O95864-3;O95864;O95864-4;O95864-2	Fatty acid desaturase 2	FADS2
2.66086	1.39336	2.55488	NaN	NaN	NaN			6	6	6	16.7	16.7	16.7	66.921	37.269	170750000	21608000	149140000	1.45215	2.10303	0	NaN	B4DJ81;P28331-3;P28331-4;P28331-5;P28331;P28331-2	B4DJ81;P28331-3;P28331-4;P28331-5;P28331;P28331-2	NADH-ubiquinone oxidoreductase 75 kDa subunit, mitochondrial	NDUFS1
1.99762	2.4703	2.14078	NaN	NaN	1.18853	+		3	3	3	36.4	36.4	36.4	12.082	21.871	201770000	37862000	163910000	2.35661	2.1029	0	1.08853	A0A087WXQ8;A0A087WY10;A0A087WUL2;P49720	A0A087WXQ8;A0A087WY10;A0A087WUL2;P49720	Proteasome subunit beta type-3	PSMB3
2.06347	2.79618	1.6712	NaN	NaN	NaN			6	6	6	10.5	10.5	10.5	77.249	20.029	490570000	159510000	331060000	1.61473	2.07695	0	NaN	A0A087X176;Q6ZRP7;H0Y430	A0A087X176;Q6ZRP7	Sulfhydryl oxidase;Sulfhydryl oxidase 2	QSOX2
2.36502	1.59917	2.50693	NaN	NaN	1.99204			4	4	4	30.6	30.6	30.6	16.698	7.913	139930000	28797000	111140000	1.73825	2.05704	0	1.89204	Q9P0J0;Q9P0J0-2;B4DEZ3;K7EJE1;E7ENQ6;U3KQP3	Q9P0J0;Q9P0J0-2;B4DEZ3;K7EJE1;E7ENQ6;U3KQP3	NADH dehydrogenase [ubiquinone] 1 alpha subcomplex subunit 13	NDUFA13
2.3899	1.97871	1.98659	NaN	NaN	2.12125	+		6	6	6	32.8	32.8	32.8	26.688	22.31	637740000	113080000	524660000	2.34736	2.0184	0	2.02125	Q9UEU0;Q9UEU0-2;J3KMW2;G3V5I2;H0YJL5;H0YJJ5	Q9UEU0;Q9UEU0-2	Vesicle transport through interaction with t-SNAREs homolog 1B	VTI1B
1.68697	2.8855	1.7162	NaN	3.95624	NaN			4	4	4	16.4	16.4	16.4	36.813	13.223	826080000	45568000	780510000	1.43243	1.99622	0	3.85624	Q8TCT9-5;Q8TCT9;A0A075B6F6;Q8TCT9-4;Q8TCT9-2;A0A0C4DGU3	Q8TCT9-5;Q8TCT9;A0A075B6F6;Q8TCT9-4;Q8TCT9-2	Minor histocompatibility antigen H13	HM13
2.15895	2.00712	NaN	1.82334	NaN	NaN			8	8	8	10.8	10.8	10.8	113.29	28.359	188680000	24076000	164610000	1.61334	1.98304	0	1.72334	Q96T76;Q96T76-8;Q96T76-9;Q96T76-5;Q5T454;H0Y746;Q96T76-7;H0Y7V3;H7C1W5;B0QZ77	Q96T76;Q96T76-8;Q96T76-9;Q96T76-5	MMS19 nucleotide excision repair protein homolog	MMS19
1.97732	NaN	2.03404	NaN	NaN	NaN			5	5	5	30.7	30.7	30.7	26.489	21.283	228410000	41234000	187170000	2.02347	1.90568	0	NaN	P20618	P20618	Proteasome subunit beta type-1	PSMB1
2.08359	1.97446	1.84499	NaN	NaN	NaN	+		6	6	6	16.2	16.2	16.2	48.633	31.228	789090000	174150000	614940000	2.86628	1.86768	0	NaN	P35998;P35998-2;C9JLS9	P35998;P35998-2	26S protease regulatory subunit 7	PSMC2
1.90916	1.96022	2.01924	2.45228	2.62237	1.13481	+		3	3	3	8.5	8.5	8.5	54.083	17.313	612280000	116120000	496160000	3.53556	1.86287	1.27981	1.96982	P11166	P11166	Solute carrier family 2, facilitated glucose transporter member 1	SLC2A1
2.15267	1.822	1.61513	NaN	NaN	1.50259			4	4	4	21.2	21.2	21.2	26.906	20.838	231280000	42369000	188910000	2.10849	1.76327	0	1.40259	Q9UNK0;I3L305;K7EQB1	Q9UNK0;I3L305;K7EQB1	Syntaxin-8	STX8
1.8817	NaN	1.7066	NaN	NaN	3.01146			4	4	4	20.3	20.3	20.3	34.893	11.003	849580000	32941000	816640000	1.48318	1.69415	0	2.91146	P05026-2;P05026;V9GYR2	P05026-2;P05026;V9GYR2	Sodium/potassium-transporting ATPase subunit beta-1	ATP1B1
1.72701	1.83293	1.78827	-4.98448	1.56604	1.24811	+		11	11	7	59.7	59.7	29.8	20.697	128.33	1380600000	940390000	440180000	3.47789	1.68273	0.132769	-0.823445	P84077;P61204;F5H423;P61204-2;F5H0C7;H0YGG7;F5H1V1;F5H6T5;F8WDB3	P84077;P61204;F5H423;P61204-2	ADP-ribosylation factor 1;ADP-ribosylation factor 3	ARF1;ARF3
1.75587	1.68545	1.75138	0.377624	-0.292899	-2.13112	+		12	12	12	15.3	15.3	15.3	107.78	69.341	17801000000	11214000000	6586800000	3.71053	1.6309	0.390981	-0.782133	P55060-3;P55060;P55060-4;P55060-2	P55060-3;P55060;P55060-4	Exportin-2	CSE1L
1.50157	1.49508	1.98965	-0.0124463	0.874049	NaN			6	6	6	14.2	14.2	14.2	53.085	13.488	380020000	95968000	284050000	1.96596	1.5621	0.227796	0.330802	Q5SZU1;O43175	Q5SZU1;O43175	D-3-phosphoglycerate dehydrogenase	PHGDH
1.95293	1.57226	1.18859	NaN	NaN	NaN			7	7	7	11.8	11.8	11.8	88.828	46.338	559830000	187160000	372670000	1.66234	1.47126	0	NaN	O43264;O43264-2;F5H3C1	O43264;O43264-2	Centromere/kinetochore protein zw10 homolog	ZW10
1.84125	1.47995	1.35733	NaN	1.18358	1.62831			21	2	0	62.7	6.5	0	46.297	13.803	2005000000	537890000	1467100000	2.01058	1.45951	0.969128	1.30594	Q71U36-2;Q71U36;F8VQQ4;F8VRZ4;F8VS66;V9GZ17;F8VX09;F8VWV9;C9JEV8;C9JQ00;C9JJQ8;A6NHL2-2;A6NHL2;C9K0S6;F8VRK0;C9JDL2;F8VXZ7;F8W0F6	Q71U36-2;Q71U36	Tubulin alpha-1A chain	TUBA1A
1.6475	1.46116	NaN	NaN	NaN	-0.204516			2	2	2	24.3	24.3	24.3	12.326	6.6526	103110000	24945000	78161000	1.39011	1.45433	0	-0.304516	Q9UJC5	Q9UJC5	SH3 domain-binding glutamic acid-rich-like protein 2	SH3BGRL2
1.64367	1.45954	NaN	NaN	NaN	1.26376			5	5	5	31.7	31.7	31.7	21.58	24.323	284110000	38459000	245650000	1.39444	1.4516	0	1.16376	Q5JR08;P61586;P08134;Q5JR07;C9JNR4;E9PQH6;C9JX21;Q5JR05;Q5JR06;E9PN11;U3KQA9;U3KQV3;E9PLA2;C9JRM1;P62745	Q5JR08;P61586;P08134;Q5JR07;C9JNR4;E9PQH6;C9JX21;Q5JR05;Q5JR06;E9PN11;U3KQA9;U3KQV3	Transforming protein RhoA;Rho-related GTP-binding protein RhoC	RHOC;RHOA
1.5564	1.83321	1.17805	1.04928	3.38101	3.05363			12	12	12	29.3	29.3	29.3	67.723	133.46	1348500000	256660000	1091800000	1.76057	1.42255	1.08898	2.39464	P04844-2;P04844;Q5JYR4;Q5JYR7;Q5JYR3;H0Y5M1;F2Z3K5	P04844-2;P04844	Dolichyl-diphosphooligosaccharide--protein glycosyltransferase subunit 2	RPN2
1.51526	1.41554	1.58063	0.0371714	0.136323	-0.0447021	+		35	21	0	72.9	56	0	32.814	323.31	33623000000	11347000000	22276000000	2.93292	1.40381	0.409621	-0.0570693	Q5TCU3;Q5TCU8;U3KQK2	Q5TCU3;Q5TCU8		TPM2
1.4619	1.37496	1.65705	1.1832	1.21698	0.762902	+		12	12	11	16.4	16.4	15.4	119.52	56.541	1164400000	329780000	834630000	2.45092	1.39797	1.64533	0.954362	O95373;E9PLB2;E9PLJ0;O15397-2	O95373	Importin-7	IPO7
1.4936	1.40174	1.58169	0.0560286	0.0930192	0.0721745	+		46	46	0	86.3	86.3	0	32.876	323.31	424020000000	149780000000	274240000000	2.85722	1.39234	0.873852	-0.0262593	P09493-3;P09493-9;Q6ZN40;P09493-8;P09493-7	P09493-3;P09493-9;Q6ZN40;P09493-8;P09493-7	Tropomyosin alpha-1 chain	TPM1
1.55758	1.42331	NaN	NaN	NaN	2.81809			3	3	3	22.4	22.4	22.4	16.762	10.386	237540000	41978000	195570000	1.51265	1.39045	0	2.71809	I3L1K7;I3L4Z6;E7EQ34;O14653-3;O14653;O14653-2;I3L0K1;I3L3V4	I3L1K7;I3L4Z6;E7EQ34;O14653-3;O14653;O14653-2;I3L0K1	Golgi SNAP receptor complex member 2	GOSR2
1.46942	1.41814	NaN	NaN	NaN	NaN			10	10	10	69.2	69.2	69.2	24.449	50.724	595610000	119700000	475910000	1.91557	1.34378	0	NaN	P21964-2;P21964;E7EMS6;E7EUU8;F8WBW9;H7BZ45	P21964-2;P21964;E7EMS6;E7EUU8	Catechol O-methyltransferase	COMT
1.85906	0.914641	1.53779	NaN	NaN	0.560128			10	10	10	16.3	16.3	16.3	101.11	39.691	1144600000	663260000	481310000	1.39364	1.33716	0	0.460128	P56192;P56192-2;H0YIC2;F5H2V6;H0YHV5;F8VS26;F8W0M7;F8W0S4;F8VZZ9	P56192;P56192-2	Methionine--tRNA ligase, cytoplasmic	MARS
1.16594	1.96532	1.14143	0.0497701	-0.453676	-0.442634			6	6	6	14.8	14.8	14.8	48.755	16.141	831470000	329210000	502260000	1.40537	1.32423	0.829962	-0.38218	P36957;P36957-2;Q86SW4;H0YJF9;G3V5M3;G3V3F0	P36957;P36957-2;Q86SW4	Dihydrolipoyllysine-residue succinyltransferase component of 2-oxoglutarate dehydrogenase complex, mitochondrial	DLST
1.40866	1.35061	1.48867	0.104068	0.165687	0.105276	+		37	28	0	76.2	62.5	0	29.032	323.31	137540000000	49111000000	88426000000	3.0345	1.31598	0.463585	0.0250103	P06753-2;P06753-3;A0A087WWU8;Q5HYB6;P06753-5;P06753-4;Q5VU61;D6R904;P06753-7;K7EP68;D6RFM2	P06753-2;P06753-3;A0A087WWU8;Q5HYB6;P06753-5;P06753-4;Q5VU61		TPM3;DKFZp686J1372
0.922426	1.93455	1.39078	1.38802	0.664483	NaN			12	12	12	13.5	13.5	13.5	123.75	35.306	509020000	163770000	345250000	1.33717	1.31592	0.625164	0.926253	H0Y8C6;O00410;O00410-3;O00410-2;O60518;C9JZD8;C9J875;C9JQT6;E7ESA1;E7ESZ1;E7EWK4;E7EX05;E7EQT5;E7ETV8;E7EV12;C9JMV5;E7ETV3	H0Y8C6;O00410;O00410-3;O00410-2	Importin-5	IPO5
1.53585	1.40174	1.30358	NaN	NaN	-0.384038	+		5	5	5	33.1	33.1	33.1	16.183	15.768	227520000	66599000	160930000	2.58243	1.31372	0	-0.484038	Q9BQI0-3;Q9BQI0;Q9BQI0-2;Q5JUP3;Q9BQI0-4;A6PVM9;H7C605	Q9BQI0-3;Q9BQI0;Q9BQI0-2;Q5JUP3;Q9BQI0-4	Allograft inflammatory factor 1-like	AIF1L
1.29561	1.47508	1.46425	0.149259	0.231678	0.171207	+		36	5	0	83.5	14.5	0	28.747	35.494	18036000000	6271000000	11765000000	2.70848	1.31165	1.11768	0.0840482	H7BYY1;F5H7S3;B7Z596;P09493-2;P09493-5;H0YL42;H0YK20;H0YL80;H0YN06	H7BYY1;F5H7S3;B7Z596;P09493-2;P09493-5;H0YL42	Tropomyosin alpha-1 chain	TPM1
1.32533	1.14802	1.60222	0.309642	0.172103	0.032524			2	2	2	10.7	10.7	10.7	16.684	38.029	7253100000	2340300000	4912800000	1.96463	1.25852	0.331459	0.0714231	P05976-2;P05976;P08590	P05976-2;P05976;P08590	Myosin light chain 1/3, skeletal muscle isoform;Myosin light chain 3	MYL1;MYL3
1.5203	1.27745	1.25846	NaN	NaN	1.64579	+		4	4	4	30.6	30.6	30.6	18.998	8.9068	125910000	33511000	92400000	2.34662	1.25207	0	1.54579	P51571;A6NLM8	P51571;A6NLM8	Translocon-associated protein subunit delta	SSR4
0.930094	1.67093	1.44387	NaN	NaN	NaN			6	6	6	11.5	11.5	11.5	94.615	40.584	188490000	47628000	140860000	1.53074	1.2483	0	NaN	Q86WA8;Q86WA8-2;E7EN44;H3BQ67;H3BUW8;H3BPF7	Q86WA8;Q86WA8-2;E7EN44	Lon protease homolog 2, peroxisomal	LONP2
1.29895	1.41878	1.2168	0.0285691	0.198494	0.0529723	+		35	4	0	73.6	13.7	0	32.989	39.838	5905900000	2068900000	3837000000	2.6317	1.21151	0.0401788	-0.0066548	P07951-2;P07951-3	P07951-2;P07951-3	Tropomyosin beta chain	TPM2
0.908582	1.57017	1.42056	1.12413	NaN	0.95442			5	5	5	17.7	17.7	17.7	44.41	27.18	615890000	201280000	414610000	1.57252	1.19977	1.24141	0.939275	Q86Y07-4;Q86Y07-3;Q86Y07;Q86Y07-5;Q86Y07-2	Q86Y07-4;Q86Y07-3;Q86Y07;Q86Y07-5;Q86Y07-2	Serine/threonine-protein kinase VRK2	VRK2
1.26177	1.2734	NaN	NaN	NaN	NaN	+		5	5	5	8.4	8.4	8.4	76.758	17.644	131700000	20586000	111120000	2.49905	1.16758	0	NaN	Q06210-2;Q06210;O94808;E5RJP4	Q06210-2;Q06210	Glutamine--fructose-6-phosphate aminotransferase [isomerizing] 1	GFPT1
1.46874	1.0937	1.21008	2.12161	1.49815	NaN			11	11	11	15.8	15.8	15.8	93.487	50.473	627680000	170170000	457510000	2.04363	1.1575	0.940048	1.70988	Q8N1F7;H3BVG0;Q8N1F7-2;H3BV15;H3BV11;H3BRD9;H3BRI8;H3BM93;H3BNN5;H3BPA9;H3BVE2	Q8N1F7;H3BVG0;Q8N1F7-2	Nuclear pore complex protein Nup93	NUP93
1.21711	1.2318	1.28842	0.567837	0.459641	0.354678	+		12	12	12	48.7	48.7	48.7	20.762	195.54	10830000000	3689600000	7140700000	3.44395	1.14578	1.55455	0.360719	H0Y7A7;P62158;E7ETZ0;E7EMB3;Q96HY3;G3V361;G3V226;M0QZ52;F8WBR5;G3V479;P27482;C9J7T9;P02585	H0Y7A7;P62158;E7ETZ0;E7EMB3;Q96HY3;G3V361	Calmodulin	CALM2;CALM1
1.27256	1.12174	1.33919	0.13947	0.127897	-0.0678179	+		34	19	18	74.6	54.8	52	28.521	273.43	19140000000	7844500000	11295000000	2.50258	1.1445	0.17528	-0.0334837	P67936;P67936-2;K7ENT6;K7ERG3;K7EMU5;K7EPV9;K7EPB9;Q2TAC2-2;Q2TAC2	P67936;P67936-2;K7ENT6	Tropomyosin alpha-4 chain	TPM4
1.20677	1.17025	1.35265	0.791606	0.8118	0.449218	+		24	24	24	36.4	36.4	36.4	97.169	198.89	7374100000	2242400000	5131700000	2.62579	1.14322	1.41751	0.584208	Q14974;Q14974-2;J3KTM9;J3QR48;J3QKQ5;J3QRG4	Q14974;Q14974-2;J3KTM9	Importin subunit beta-1	KPNB1
1.26424	1.41197	1.05283	NaN	0.433387	0.0897694			35	2	2	43.8	2.7	2.7	79.361	24.814	909400000	343430000	565960000	2.08562	1.14301	0.28439	0.161578	Q0ZGT2-2;H7BXY5;E7EUA0;E7ETM8	Q0ZGT2-2;H7BXY5;E7EUA0	Nexilin	NEXN
1.19074	1.2176	1.30725	0.24245	0.242572	0.132248	+		14	14	11	61.5	61.5	47.1	22.764	57.748	141410000000	50453000000	90960000000	3.01962	1.13853	0.989108	0.105757	P14649;F8W1I5;F8VSA2	P14649;F8W1I5	Myosin light chain 6B	MYL6B
NaN	1.28777	1.17095	NaN	NaN	NaN			2	2	2	7.8	7.8	7.8	32.532	4.7714	45996000	14733000	31262000	1.48286	1.12936	0	NaN	O00743-2;O00743;O00743-3	O00743-2;O00743;O00743-3	Serine/threonine-protein phosphatase 6 catalytic subunit;Serine/threonine-protein phosphatase 6 catalytic subunit, N-terminally processed	PPP6C
1.02482	1.3072	1.34085	NaN	-0.268591	-0.69867			11	10	10	49.3	47.1	47.1	40.569	88.646	2430800000	802470000	1628300000	2.1051	1.12429	0.648324	-0.58363	P28289;P28289-2;Q9NZQ9-2;Q9NZQ9	P28289;P28289-2	Tropomodulin-1	TMOD1
1.20013	1.17044	1.30135	NaN	1.78409	1.49968	+		3	3	3	25	25	25	12.274	27.91	142620000	43029000	99586000	2.90631	1.12397	1.23249	1.54188	P62877	P62877	E3 ubiquitin-protein ligase RBX1;E3 ubiquitin-protein ligase RBX1, N-terminally processed	RBX1
1.22645	1.32124	1.1137	0.292311	1.26496	0.678793	+		44	44	26	72.5	72.5	48.2	83.263	323.31	40826000000	16983000000	23843000000	2.54457	1.12046	0.824068	0.645353	P08238;Q58FF7;Q14568;Q58FF6	P08238	Heat shock protein HSP 90-beta	HSP90AB1
1.16511	1.1173	1.32924	0.0304067	-0.0690583	-0.0442557	+		12	4	4	66.3	29.1	29.1	19.827	27.243	1912100000	623190000	1289000000	2.47323	1.10388	1.2949	-0.127636	P24844;P24844-2	P24844;P24844-2	Myosin regulatory light polypeptide 9	MYL9
1.19736	1.09828	1.29813	0.015212	0.0117819	0.00345838	+	+	12	6	6	71.7	44	44	18.736	62.36	8510100000	2927900000	5582200000	2.56072	1.09793	2.82245	-0.0898492	Q9Y281;Q9Y281-3;F8WDN3;G3V2U0	Q9Y281;Q9Y281-3	Cofilin-2	CFL2
1.22014	1.19099	1.14065	NaN	NaN	1.33788	+		3	3	3	14.5	14.5	14.5	23.643	6.0463	225670000	67086000	158590000	3.33862	1.08393	0	1.23788	C9JNK6;O75431-2;O75431;C9JAZ1	C9JNK6;O75431-2;O75431;C9JAZ1	Metaxin-2	MTX2
0.944933	1.40125	1.19654	NaN	NaN	NaN			2	2	2	3.3	3.3	3.3	82.809	4.2814	105880000	29923000	75960000	1.83628	1.08091	0	NaN	Q5VUJ6-2;Q5VUJ6	Q5VUJ6-2;Q5VUJ6	Leucine-rich repeat and calponin homology domain-containing protein 2	LRCH2
1.1529	1.09302	1.2286	0.231555	0.213254	0.126709	+		15	15	1	83.7	83.7	17.4	19.779	323.31	263600000000	93808000000	169790000000	2.8628	1.05817	0.968806	0.0905059	O14950;P19105;J3KTJ1	O14950;P19105	Myosin regulatory light chain 12B;Myosin regulatory light chain 12A	MYL12B;MYL12A
1.46252	1.00813	0.917775	0.237197	0.266996	-2.1042			9	9	9	44	44	44	23.742	23.682	2221700000	1442700000	779010000	1.5888	1.02948	0.296964	-0.633336	P23284	P23284	Peptidyl-prolyl cis-trans isomerase B	PPIB
0.874522	1.28024	1.21263	NaN	NaN	NaN			5	5	5	8.5	8.5	8.5	63.138	13.275	205740000	50082000	155660000	1.8317	1.02247	0	NaN	Q5H909;Q9UNF1-2;Q9UNF1;Q5H907	Q5H909;Q9UNF1-2;Q9UNF1;Q5H907	Melanoma-associated antigen D2	MAGED2
1.10849	1.0767	1.1811	0.243669	0.222805	0.116232	+		12	9	9	82.1	66.2	66.2	16.961	187.3	100110000000	34439000000	65676000000	3.03972	1.0221	0.855181	0.0942351	P60660-2;F8W1R7;G8JLA2;G3V1V0;P60660;J3KND3;B7Z6Z4;F8VPF3;G3V1Y7;F8VZU9;F8W180;F8VXL3;H0YI43	P60660-2;F8W1R7;G8JLA2;G3V1V0;P60660;J3KND3;B7Z6Z4;F8VPF3;G3V1Y7	Myosin light polypeptide 6	MYL6
1.11417	1.08631	1.16459	0.0483758	0.00877379	-0.0302951	+		25	10	10	77.4	41.3	41.3	37.186	98.565	25426000000	9689900000	15736000000	3.29892	1.02169	1.24448	-0.0910485	P62140;E7ETD8;C9JP48;C9J9S3;H0Y3Y6;F8WE71;F8W1A0	P62140;E7ETD8	Serine/threonine-protein phosphatase PP1-beta catalytic subunit;Serine/threonine-protein phosphatase	PPP1CB
0.882917	1.24574	1.23364	0.339023	0.310573	0.0496307			24	24	24	42	42	42	64.168	152.56	11247000000	4444900000	6801900000	1.87568	1.02077	0.544692	0.133076	E7EX44;Q05682-5;Q05682-3;E9PGZ1;Q05682-4;Q05682-6;Q05682-2;Q05682;C9J813;C9JEK3;C9JE79;F8WE61;REV__H0YH95;REV__H0YEF9;REV__E9PJZ7;REV__H0YHK3;REV__O75334-6;REV__O75334-5;REV__Q13136-2;REV__Q13136;REV__O75334-2;REV__O75334-4;REV__G3V200;REV__O75334-3;REV__O75334	E7EX44;Q05682-5;Q05682-3;E9PGZ1;Q05682-4;Q05682-6;Q05682-2;Q05682;C9J813	Caldesmon	CALD1
1.25199	1.13429	0.956651	0.383829	0.607484	-0.186935	+		10	10	4	36	36	13.3	46.306	74.382	2498200000	1170200000	1328000000	2.14959	1.01431	0.258931	0.168126	G5E972;P42167;P42167-2;H0YJH7;P42167-3	G5E972;P42167;P42167-2;H0YJH7;P42167-3	Lamina-associated polypeptide 2, isoforms beta/gamma;Thymopoietin;Thymopentin	TMPO
0.918997	1.1606	1.24349	NaN	NaN	0.262794			10	10	10	27.8	27.8	27.8	45.413	51.408	3267500000	822590000	2444900000	2.03614	1.00769	0	0.162794	Q9Y608-2;Q9Y608-4;Q9Y608-5;Q9Y608;H7C3N9;Q9Y608-3;C9JSU1;C9JJC9;C9JC17;C9J321;C9J0U5;Q32MZ4-4;Q32MZ4-3;Q32MZ4-2;Q32MZ4	Q9Y608-2;Q9Y608-4;Q9Y608-5;Q9Y608	Leucine-rich repeat flightless-interacting protein 2	LRRFIP2
NaN	NaN	NaN	3.66414	4.39575	5.95531			2	2	2	23	23	23	8.0866	20.255	957920000	59658000	898270000	0	NaN	1.67467	4.57173	H7BYV1;E9PS44;E9PQN9;P13164;Q01629;Q01628	H7BYV1;E9PS44;E9PQN9;P13164;Q01629;Q01628	Interferon-induced transmembrane protein 1;Interferon-induced transmembrane protein 2;Interferon-induced transmembrane protein 3	IFITM2;IFITM3;IFITM1
NaN	NaN	NaN	5.95191	6.12336	5.76877		+	7	7	4	60	60	24.3	8.577	12.726	2098800000	64560000	2034200000	0	NaN	3.51379	5.84801	F5GZY7;Q9H0R8;Q9H0R8-2;F5GX12;F5H007;G3V1T7	F5GZY7;Q9H0R8;Q9H0R8-2	Gamma-aminobutyric acid receptor-associated protein-like 1	GABARAPL1
NaN	NaN	NaN	1.95613	2.09619	1.59187			4	4	4	9.3	9.3	9.3	52.541	33.267	1083600000	340470000	743170000	0	NaN	2.15219	1.7814	J3QRS9;X6R4W8;O43670-2;O43670;O43670-4;J3KS31;O43670-3;J3QS27;J3KTL1;J3KRB6;J3KRW6;H0Y3M2	J3QRS9;X6R4W8;O43670-2;O43670;O43670-4;J3KS31;O43670-3	BUB3-interacting and GLEBS motif-containing protein ZNF207	ZNF207
NaN	NaN	NaN	NaN	1.20207	1.33039			3	3	3	8.7	8.7	8.7	58.182	13.113	273260000	99189000	174070000	0	NaN	1.4561	1.16623	M0QWZ7;Q9NP81;Q9NP81-2;M0QX29;M0R259;M0R2C6;M0R2H5;B4DJM9	M0QWZ7;Q9NP81;Q9NP81-2;M0QX29;M0R259;M0R2C6	Serine--tRNA ligase, mitochondrial	SARS2
NaN	NaN	NaN	3.09026	3.06611	1.53908			6	6	6	24.5	24.5	24.5	36.923	46.875	352010000	65215000	286800000	0	NaN	1.39047	2.46515	M0QXB4;O14579;A0A087X0I4;O14579-3;O14579-2;M0R061	M0QXB4;O14579;A0A087X0I4;O14579-3;O14579-2;M0R061	Coatomer subunit epsilon	COPE
NaN	NaN	NaN	4.41041	3.15006	3.16771			11	11	11	21.9	21.9	21.9	80.76	67.741	582130000	87837000	494290000	0	NaN	1.85074	3.47606	O43815-2;O43815;M0QXN2;M0R2A7;G3V3G7;M0QYS2;M0R0P4;M0R0W8;G3V340;F5GYK2;Q9NRL3-2;Q13033-2;Q9NRL3;Q9NRL3-3;Q13033	O43815-2;O43815	Striatin	STRN
NaN	NaN	NaN	2.19969	2.00515	1.3097			5	5	5	7	7	7	155.2	23.265	153060000	36065000	116990000	0	NaN	1.6324	1.73818	O75694;E9PF10;O75694-2;D6RA13	O75694;E9PF10;O75694-2	Nuclear pore complex protein Nup155	NUP155
NaN	NaN	NaN	5.51721	6.00863	6.51775		+	9	1	1	43.6	6.4	6.4	25.609	41.939	2833600000	63876000	2769700000	0	NaN	2.62406	5.91453	O95197-3;O95197-5;O95197-6;B7Z4M1	O95197-3;O95197-5	Reticulon-3	RTN3
NaN	NaN	NaN	2.16855	1.31028	1.26388			2	2	2	12.4	12.4	12.4	24.763	13.101	163990000	58215000	105770000	0	NaN	1.42879	1.4809	P24534;F8WF65;F2Z2G2;C9JZW3	P24534;F8WF65;F2Z2G2;C9JZW3	Elongation factor 1-beta	EEF1B2
NaN	NaN	NaN	3.13248	2.7569	2.85669		+	13	13	13	47.5	47.5	47.5	41.389	54.045	1291800000	264790000	1027000000	0	NaN	2.79919	2.81535	P28482;P28482-2;E9PJF0;E9PQW4;P27361-2;P27361-3;P27361;B3KR49;E9PBK7;H0YDH9;K7ELV1;K7EN18;P31152;Q16659	P28482;P28482-2	Mitogen-activated protein kinase 1	MAPK1
NaN	NaN	NaN	3.24911	3.681	2.66848			10	10	10	33.1	33.1	33.1	52.645	35.103	1014100000	74581000	939550000	0	NaN	2.05364	3.09953	P31930	P31930	Cytochrome b-c1 complex subunit 1, mitochondrial	UQCRC1
NaN	NaN	NaN	3.59096	3.88029	3.26134		+	6	6	6	18.1	18.1	18.1	50.151	31.088	268690000	34148000	234540000	0	NaN	2.57951	3.47753	P36551;H0YA22;P36551-2	P36551	Oxygen-dependent coproporphyrinogen-III oxidase, mitochondrial	CPOX
NaN	NaN	NaN	2.71207	3.46767	3.0963		+	2	2	2	6.4	6.4	6.4	31.689	6.3433	764970000	129940000	635030000	0	NaN	2.27792	2.99201	Q5T8R3;Q5T8R5;P53985-2;P53985;Q5T8R4	Q5T8R3;Q5T8R5;P53985-2;P53985;Q5T8R4	Monocarboxylate transporter 1	SLC16A1
NaN	NaN	NaN	2.54604	2.84258	2.91827		+	13	13	13	38.9	38.9	38.9	54.722	59.695	1855200000	334390000	1520800000	0	NaN	2.74324	2.66896	Q12834	Q12834	Cell division cycle protein 20 homolog	CDC20
NaN	NaN	NaN	3.20065	1.66853	3.53543			3	3	3	13.7	13.7	13.7	25.206	9.8703	293780000	34675000	259110000	0	NaN	1.37268	2.70153	Q13445;K7EIN4;K7EQ63	Q13445;K7EIN4;K7EQ63	Transmembrane emp24 domain-containing protein 1	TMED1
NaN	NaN	NaN	3.2603	NaN	3.16866			5	5	5	9.8	9.8	9.8	91.706	19.672	267480000	90824000	176660000	0	NaN	2.02849	3.11448	Q96QK1	Q96QK1	Vacuolar protein sorting-associated protein 35	VPS35
NaN	NaN	NaN	2.65324	2.75399	2.64462		+	7	7	7	19.6	19.6	19.6	50.096	19.076	556550000	104730000	451820000	0	NaN	3.73388	2.58395	Q99615-2;Q99615;K7EPP7;K7ESP1;K7EIH8;K7EJE9;K7EK03;K7EJL5;K7EN19;K7EJV7;K7ER44;K7ELJ8;K7EJ24	Q99615-2;Q99615;K7EPP7;K7ESP1;K7EIH8	DnaJ homolog subfamily C member 7	DNAJC7
NaN	NaN	NaN	5.30801	5.2958	3.88714			4	4	4	27.4	27.4	27.4	25.127	32.133	1792600000	38947000	1753700000	0	NaN	2.00904	4.73031	Q99720;Q99720-4;Q99720-3;Q99720-5;Q99720-2;Q5T1J1	Q99720;Q99720-4;Q99720-3;Q99720-5;Q99720-2	Sigma non-opioid intracellular receptor 1	SIGMAR1
NaN	NaN	NaN	2.01214	4.06117	2.72618			6	6	6	9.3	9.3	9.3	67.887	10.303	715970000	159540000	556420000	0	NaN	1.37566	2.83316	Q9HD45;Q5TB53	Q9HD45;Q5TB53	Transmembrane 9 superfamily member 3	TM9SF3
NaN	NaN	NaN	NaN	3.30046	3.2709		+	4	4	4	11	11	11	51.199	12.227	229690000	24225000	205460000	0	NaN	2.52968	3.18568	Q9UL15;Q9UL15-2	Q9UL15;Q9UL15-2	BAG family molecular chaperone regulator 5	BAG5
NaN	NaN	NaN	1.04082	1.56852	1.92877			7	7	6	4.5	4.5	4.1	269.76	27.095	192060000	42423000	149640000	0	NaN	1.49846	1.4127	Q9Y490	Q9Y490	Talin-1	TLN1
NaN	NaN	NaN	1.69662	2.45383	2.07974			5	5	5	12.9	12.9	12.9	52.569	15.388	515040000	158110000	356930000	0	NaN	1.92049	1.97673	Q9Y5X2;C9J8E6;C9J014;C9J271;C9JCB9	Q9Y5X2;C9J8E6;C9J014;C9J271	Sorting nexin-8	SNX8
NaN	NaN	NaN	NaN	NaN	NaN			2	2	2	3.4	3.4	3.4	108.73	3.2976	5423400	5423400	0	0	NaN	0	NaN	H0Y394;A0A024R4E5;Q00341-2;Q00341;H7C0A4	H0Y394;A0A024R4E5;Q00341-2;Q00341;H7C0A4	Vigilin	HDLBP
NaN	NaN	NaN	NaN	NaN	NaN			1	1	1	1.4	1.4	1.4	87.229	2.7496	42771000	23254000	19518000	0	NaN	0	NaN	A0A024RAC6	A0A024RAC6		TCEB3
NaN	NaN	NaN	NaN	NaN	NaN			1	1	1	17.8	17.8	17.8	20.398	16.973	32867000	32867000	0	0	NaN	0	NaN	G8JLL2;A0A0G2JK02;A0A0G2JIU6;A0A0G2JHB6;A0A0G2JKR3;A0A0G2JLL3;A0A0G2JLA3;A0A0G2JH76;A0A024RCQ8;Q9UMR5-2;Q9UMR5;Q9UMR5-3	G8JLL2;A0A0G2JK02;A0A0G2JIU6;A0A0G2JHB6;A0A0G2JKR3;A0A0G2JLL3;A0A0G2JLA3;A0A0G2JH76;A0A024RCQ8;Q9UMR5-2;Q9UMR5;Q9UMR5-3	Lysosomal thioesterase PPT2	PPT2;hCG_1999928
NaN	NaN	NaN	NaN	NaN	NaN			3	3	3	37.7	37.7	37.7	11.208	17.341	492070000	484360000	7709500	0	NaN	0	NaN	A0A075B6L0;A0A075B6K9;P0CG06;P0CG05;A0A075B6K8;A0A0B4J231;P0CG04;P0CF74;B9A064;A0A075B6L1;A0M8Q6	A0A075B6L0;A0A075B6K9;P0CG06;P0CG05;A0A075B6K8;A0A0B4J231;P0CG04;P0CF74;B9A064	Ig lambda-3 chain C regions;Ig lambda-2 chain C regions;Ig lambda-1 chain C regions;Ig lambda-6 chain C region;Immunoglobulin lambda-like polypeptide 5	IGLC3;IGLC2;IGLC1;IGLL5;IGLC6
NaN	NaN	NaN	NaN	NaN	NaN			2	2	2	4.7	4.7	4.7	106.9	3.9434	41700000	18100000	23600000	0	NaN	0	NaN	A0A087WXD2;H7C5T8;H7C4U7;H7C535;A0A087WT53;Q96QZ7-4;Q96QZ7-3;Q96QZ7-5;Q96QZ7-7;Q96QZ7-6;Q96QZ7-2;Q96QZ7	A0A087WXD2;H7C5T8;H7C4U7;H7C535;A0A087WT53;Q96QZ7-4;Q96QZ7-3;Q96QZ7-5;Q96QZ7-7;Q96QZ7-6;Q96QZ7-2;Q96QZ7	Membrane-associated guanylate kinase, WW and PDZ domain-containing protein 1	MAGI1
NaN	NaN	NaN	NaN	NaN	NaN			1	1	1	36.8	36.8	36.8	8.803	10.671	10485000	10485000	0	0	NaN	0	NaN	A0A087WTC8;L0R6P0;P86397	A0A087WTC8;L0R6P0;P86397	Hydroxyacyl-thioester dehydratase type 2, mitochondrial	RPP14
NaN	NaN	NaN	NaN	NaN	NaN			1	1	1	10.8	10.8	10.8	16.789	10.088	18774000	7999000	10775000	0	NaN	0	NaN	A0A087WTC9;G3V5I6;G3V256;H0YJA2;Q6PJT7-10;Q6PJT7-4;Q6PJT7-3;Q6PJT7-11;Q6PJT7-5;Q6PJT7-9;Q6PJT7-2;Q6PJT7	A0A087WTC9;G3V5I6;G3V256;H0YJA2;Q6PJT7-10;Q6PJT7-4;Q6PJT7-3;Q6PJT7-11;Q6PJT7-5;Q6PJT7-9;Q6PJT7-2;Q6PJT7	Zinc finger CCCH domain-containing protein 14	ZC3H14
NaN	NaN	NaN	NaN	NaN	NaN			1	1	1	10.6	10.6	10.6	11.032	2.8576	127330000	3284000	124040000	0	NaN	0	NaN	C9JL43;C9JUC3;C9J7N0;C9JXQ7;C9JHH5;A0A087WTU3;Q9Y6I9	C9JL43;C9JUC3;C9J7N0;C9JXQ7;C9JHH5;A0A087WTU3;Q9Y6I9	Testis-expressed sequence 264 protein	TEX264
NaN	NaN	NaN	NaN	NaN	NaN			2	1	1	11.8	6.5	6.5	25.868	7.0992	15369000	15369000	0	0	NaN	0	NaN	A0A087WTV6;J3KR12;Q96C36;A0A087WZR9	A0A087WTV6;J3KR12;Q96C36;A0A087WZR9	Pyrroline-5-carboxylate reductase 2;Pyrroline-5-carboxylate reductase	PYCR2
NaN	NaN	NaN	NaN	NaN	NaN			1	1	1	6.7	6.7	6.7	27.015	11.301	4362800	0	4362800	0	NaN	0	NaN	A0A087WTZ5;E9PJ81;E9PRQ7;Q04323;Q04323-2	A0A087WTZ5;E9PJ81;E9PRQ7;Q04323;Q04323-2	UBX domain-containing protein 1	UBXN1
NaN	NaN	NaN	NaN	NaN	NaN			2	2	2	6.2	6.2	6.2	30.752	6.1445	95672000	49284000	46388000	0	NaN	0	NaN	A0A087WUF6;P09038-2;P09038-3;P09038-1;P09038	A0A087WUF6;P09038-2;P09038-3;P09038-1;P09038	Fibroblast growth factor;Fibroblast growth factor 2	FGF2
NaN	NaN	NaN	NaN	NaN	NaN			18	1	1	37.2	4.1	4.1	40.04	6.2651	156690000	96501000	60187000	0	NaN	0	NaN	A0A087WUK2;O14979	A0A087WUK2;O14979	Heterogeneous nuclear ribonucleoprotein D-like	HNRNPDL
NaN	NaN	NaN	NaN	NaN	NaN			2	2	2	33	33	33	9.3804	5.7441	56442000	48935000	7506200	0	NaN	0	NaN	Q5T123;A0A087WV23;Q9H299	Q5T123;A0A087WV23;Q9H299	SH3 domain-binding glutamic acid-rich-like protein 3	SH3BGRL3
NaN	NaN	NaN	NaN	NaN	1.7479			1	1	1	12.2	12.2	12.2	8.8779	3.7212	170470000	53186000	117290000	0	NaN	0	1.6479	A0A087WV46;C9JXA7;Q0VGL1	A0A087WV46;C9JXA7;Q0VGL1	Ragulator complex protein LAMTOR4;Ragulator complex protein LAMTOR4, N-terminally processed	LAMTOR4
NaN	NaN	NaN	NaN	NaN	0.590913			2	2	2	9.5	9.5	9.5	38.893	15.015	87606000	45555000	42051000	0	NaN	0	0.490913	A0A087WV52;Q9NP92	A0A087WV52;Q9NP92	28S ribosomal protein S30, mitochondrial	MRPS30
NaN	NaN	NaN	NaN	NaN	NaN			1	1	1	34	34	34	4.9969	6.698	29478000	7979200	21499000	0	NaN	0	NaN	A0A087WY94;A0A087WVD7;Q9Y3D8	A0A087WY94;A0A087WVD7;Q9Y3D8	Adenylate kinase isoenzyme 6	TAF9;AK6
NaN	NaN	NaN	NaN	NaN	0.453122			3	3	3	14.2	14.2	14.2	34.767	8.7233	43361000	24987000	18374000	0	NaN	0	0.353122	A0A087WVI1;Q96JY6;Q96JY6-3;C9J760;C9J0X3;C9K0F0;C9JSR2;C9JS55;Q96JY6-2;Q96JY6-4;Q96JY6-5;A0A087WU48;F8WFB8;E5RGS7;A0A087WXJ0;H0YBP7;B3KPU0	A0A087WVI1;Q96JY6;Q96JY6-3;C9J760;C9J0X3;C9K0F0;C9JSR2;C9JS55;Q96JY6-2;Q96JY6-4;Q96JY6-5	PDZ and LIM domain protein 2	PDLIM2
NaN	NaN	NaN	NaN	NaN	NaN			1	1	1	3.5	3.5	3.5	49.154	3.7565	5438600	5438600	0	0	NaN	0	NaN	A0A087WW14;Q0VDG4-2;Q0VDG4	A0A087WW14;Q0VDG4-2;Q0VDG4	Secernin-3	SCRN3
NaN	NaN	NaN	NaN	NaN	NaN			2	2	2	7.5	7.5	7.5	72.976	16.816	67760000	57652000	10108000	0	NaN	0	NaN	E9PJ21;A0A087WWI4;K7EQK2;A0A087X054;Q9Y4L1-2;Q9Y4L1	E9PJ21;A0A087WWI4;K7EQK2;A0A087X054;Q9Y4L1-2;Q9Y4L1	Hypoxia up-regulated protein 1	HYOU1
NaN	NaN	NaN	NaN	NaN	NaN			4	3	3	7.3	6.3	6.3	77.319	5.0191	0	0	0	0	NaN	0	NaN	A0A0C4DGT8;A0A087WWP8;Q5VWQ0;H7C2D3;C9JM20;A0A0C4DH79;Q5VWQ0-4	A0A0C4DGT8;A0A087WWP8;Q5VWQ0	Round spermatid basic protein 1	RSBN1
NaN	NaN	NaN	NaN	NaN	1.51111			2	2	2	15.4	15.4	15.4	22.373	29.271	213250000	60829000	152420000	0	NaN	0	1.41111	Q8N1B9;C9J6X0;A0A087WXC5;E7ESZ7;O95299;O95299-2	Q8N1B9;C9J6X0;A0A087WXC5;E7ESZ7;O95299;O95299-2	NADH dehydrogenase [ubiquinone] 1 alpha subcomplex subunit 10, mitochondrial	NDUFA10
NaN	NaN	NaN	NaN	NaN	NaN			1	1	1	5	5	5	21.872	2.4039	15287000	0	15287000	0	NaN	0	NaN	K7ERW9;A0A087WXS7;O43681	K7ERW9;A0A087WXS7;O43681	ATPase ASNA1	ASNA1
NaN	NaN	NaN	NaN	NaN	NaN			2	2	2	8.6	8.6	8.6	31.102	3.7922	64969000	27947000	37021000	0	NaN	0	NaN	A0A087WY55;Q9NP79;Q5TGM0;Q9NP79-2	A0A087WY55;Q9NP79;Q5TGM0;Q9NP79-2	Vacuolar protein sorting-associated protein VTA1 homolog	VTA1
NaN	NaN	NaN	NaN	NaN	NaN			1	1	1	12.5	12.5	12.5	13.654	13.668	4889500	0	4889500	0	NaN	0	NaN	A0A087WYR0;P09132	A0A087WYR0;P09132	Signal recognition particle 19 kDa protein	SRP19
NaN	NaN	NaN	NaN	NaN	NaN			1	1	1	12	12	12	16.929	2.8722	22258000	4341600	17917000	0	NaN	0	NaN	C9JWG0;C9JVG3;C9JQU9;C9JNZ1;A0A087WYS1;E7EUC7;Q16851-2;Q16851	C9JWG0;C9JVG3;C9JQU9;C9JNZ1;A0A087WYS1;E7EUC7;Q16851-2;Q16851	UTP--glucose-1-phosphate uridylyltransferase	UGP2
NaN	NaN	NaN	NaN	NaN	NaN			2	2	2	13.4	13.4	13.4	19.155	11.537	147960000	30701000	117250000	0	NaN	0	NaN	A0A087WYT3;Q15185-3;Q15185-4;Q15185;B4DDC6;Q15185-2	A0A087WYT3;Q15185-3;Q15185-4;Q15185;B4DDC6;Q15185-2	Prostaglandin E synthase 3	PTGES3
NaN	NaN	NaN	NaN	NaN	NaN			1	1	1	2.2	2.2	2.2	66.476	2.315	35265000	13424000	21841000	0	NaN	0	NaN	A0A087WYU1;Q9Y5X1	A0A087WYU1;Q9Y5X1	Sorting nexin;Sorting nexin-9	SNX9
NaN	NaN	NaN	NaN	NaN	NaN			1	1	1	2.8	2.8	2.8	77.859	3.1466	3961900	1802800	2159100	0	NaN	0	NaN	Q8IY67-2;A0A087WZ13;E9PAU2	Q8IY67-2;A0A087WZ13;E9PAU2		RAVER1
NaN	NaN	NaN	NaN	NaN	NaN			1	1	1	4.9	4.9	4.9	33.282	2.8645	58789000	26363000	32425000	0	NaN	0	NaN	A0A087WZC7;Q13601-2;Q13601	A0A087WZC7;Q13601-2;Q13601	KRR1 small subunit processome component homolog	KRR1
NaN	NaN	NaN	NaN	NaN	2.30448			4	4	4	15.8	15.8	15.8	42.41	23.859	158790000	34181000	124610000	0	NaN	0	2.20448	A0A087WZN1;O43837;A0A087X2E5;O43837-3;O43837-2;A0A0D9SG66	A0A087WZN1;O43837;A0A087X2E5;O43837-3;O43837-2;A0A0D9SG66	Isocitrate dehydrogenase [NAD] subunit, mitochondrial;Isocitrate dehydrogenase [NAD] subunit beta, mitochondrial	IDH3B
NaN	NaN	NaN	NaN	NaN	NaN			1	1	1	9.3	9.3	9.3	15.428	3.3926	13690000	4572000	9117600	0	NaN	0	NaN	A0A087X0N2;O15243	A0A087X0N2;O15243	Leptin receptor gene-related protein	LEPROT
NaN	NaN	NaN	NaN	NaN	NaN			2	2	2	1.6	1.6	1.6	130.46	2.5883	9432800	5906700	3526100	0	NaN	0	NaN	D6RBW0;A0A087X0P0;Q02224-3;Q02224-2;Q02224	D6RBW0;A0A087X0P0;Q02224-3;Q02224-2;Q02224	Kinesin-like protein;Centromere-associated protein E	CENPE
NaN	NaN	NaN	NaN	NaN	NaN			1	1	1	1.7	1.7	1.7	57.305	2.4777	56296000	21055000	35241000	0	NaN	0	NaN	A0A087X0P5;P09923;P10696;P05187	A0A087X0P5;P09923;P10696;P05187	Alkaline phosphatase;Intestinal-type alkaline phosphatase;Alkaline phosphatase, placental-like;Alkaline phosphatase, placental type	ALPPL2;ALPI;ALPP
NaN	NaN	NaN	NaN	NaN	NaN			1	1	1	11	11	11	19.825	19.475	38759000	36529000	2229800	0	NaN	0	NaN	A0A087X0R6;Q9UMY4-3;Q9UMY4-2;Q9UMY4	A0A087X0R6;Q9UMY4-3;Q9UMY4-2;Q9UMY4	Sorting nexin-12	SNX12
NaN	NaN	NaN	NaN	2.18878	NaN			2	2	2	27.1	27.1	27.1	7.8423	4.0823	36305000	7725200	28579000	0	NaN	0	2.08878	F8WAS3;C9IZN5;A0A087X1G1;H7BYD0;Q16718-2;Q16718	F8WAS3;C9IZN5;A0A087X1G1;H7BYD0;Q16718-2;Q16718	NADH dehydrogenase [ubiquinone] 1 alpha subcomplex subunit 5	NDUFA5
NaN	NaN	NaN	NaN	NaN	NaN			1	1	1	8.2	8.2	8.2	19.891	5.2125	60806000	31931000	28875000	0	NaN	0	NaN	A0A087X1R4;Q15007-2;Q15007	A0A087X1R4;Q15007-2;Q15007	Pre-mRNA-splicing regulator WTAP	WTAP
NaN	NaN	NaN	NaN	NaN	NaN			1	1	1	4.6	4.6	4.6	32.693	5.3145	48932000	27073000	21859000	0	NaN	0	NaN	A0A087X1W2;E9PKG1;H7C2I1;Q99873-3;Q99873-2;Q99873-4;Q99873	A0A087X1W2;E9PKG1;H7C2I1;Q99873-3;Q99873-2;Q99873-4;Q99873	Protein arginine N-methyltransferase 1	PRMT1
NaN	NaN	NaN	NaN	NaN	NaN			2	2	2	3.1	3.1	3.1	102.28	3.4744	21080000	2898100	18182000	0	NaN	0	NaN	A0A087X211;Q8TCG1-2;Q8TCG1	A0A087X211;Q8TCG1-2;Q8TCG1	Protein CIP2A	KIAA1524
NaN	NaN	NaN	NaN	NaN	NaN			2	1	1	18.9	11.5	11.5	16.498	7.24	19327000	10278000	9048500	0	NaN	0	NaN	K7ES69;A0A087X271;B4DDF4;B4DUT8;Q99439-2;Q99439	K7ES69;A0A087X271;B4DDF4;B4DUT8;Q99439-2;Q99439	Calponin;Calponin-2	CNN2
NaN	NaN	NaN	NaN	NaN	NaN			1	1	1	3.5	3.5	3.5	54.448	2.5318	17238000	3984900	13253000	0	NaN	0	NaN	A0A096LP25;Q6ZSR9	A0A096LP25;Q6ZSR9	Uncharacterized protein FLJ45252	AAK1
NaN	NaN	NaN	2.41733	3.29656	0.975924			7	7	7	31.5	31.5	31.5	29.892	18.86	778670000	312750000	465920000	0	NaN	1.0566	2.12994	A0A0A0MQS1;Q53H96;Q53H96-2;B5MD87;F8WEI0	A0A0A0MQS1;Q53H96;Q53H96-2;B5MD87	Pyrroline-5-carboxylate reductase;Pyrroline-5-carboxylate reductase 3	PYCRL
NaN	NaN	NaN	NaN	NaN	NaN			4	4	4	25.9	25.9	25.9	22.31	41.11	89386000	87426000	1960200	0	NaN	0	NaN	A0A0A0MQT0;P09455;A0A0A0MTB9;H0YAK8;P09455-2;P09455-3	A0A0A0MQT0;P09455;A0A0A0MTB9;H0YAK8;P09455-2;P09455-3	Retinol-binding protein 1	RBP1
NaN	NaN	NaN	NaN	NaN	NaN			1	1	1	8	8	8	19.16	4.543	11201000	845590	10355000	0	NaN	0	NaN	H0YCI6;A0A0A0MQX4;E9PPN3;E9PS17;E9PK59;Q96KG9-5;Q96KG9-3;Q96KG9-4;Q96KG9-6;Q96KG9-2;Q96KG9	H0YCI6;A0A0A0MQX4;E9PPN3;E9PS17;E9PK59;Q96KG9-5;Q96KG9-3;Q96KG9-4;Q96KG9-6;Q96KG9-2;Q96KG9	N-terminal kinase-like protein	SCYL1
NaN	NaN	NaN	NaN	NaN	NaN			3	3	3	25.9	25.9	25.9	18.388	10.957	111720000	5737800	105980000	0	NaN	0	NaN	Q5T092;A0A0A0MR06;Q5T091;Q9P0H9;O15258;Q5T093	Q5T092;A0A0A0MR06;Q5T091;Q9P0H9;O15258	Protein RER1	RER1
NaN	NaN	NaN	NaN	NaN	NaN			1	1	1	11.5	11.5	11.5	11.075	2.4651	5432900	5432900	0	0	NaN	0	NaN	K7ES20;K7ENC6;J3QRG6;A0A0A0MRI0;P42771-2;P42772;P42771;P42771-4	K7ES20;K7ENC6;J3QRG6;A0A0A0MRI0;P42771-2;P42772;P42771;P42771-4	Cyclin-dependent kinase inhibitor 2A;Cyclin-dependent kinase 4 inhibitor B	CDKN2A;CDKN2B
NaN	NaN	NaN	NaN	NaN	-2.64494			1	1	1	32.6	32.6	32.6	5.0538	5.3125	78936000	67378000	11558000	0	NaN	0	-2.74494	S4R402;S4R341;S4R349;A0A0A0MRM9;Q14978;Q14978-3;Q14978-2	S4R402;S4R341;S4R349;A0A0A0MRM9;Q14978;Q14978-3;Q14978-2	Nucleolar and coiled-body phosphoprotein 1	NOLC1
NaN	NaN	NaN	NaN	NaN	NaN			1	1	1	3.2	3.2	3.2	55.57	16.511	306360000	184210000	122150000	0	NaN	0	NaN	A0A0A0MRN4;Q5BKZ1-3;Q5BKZ1	A0A0A0MRN4;Q5BKZ1-3;Q5BKZ1	DBIRD complex subunit ZNF326	ZNF326
NaN	NaN	NaN	-5.13664	NaN	-2.73822			1	1	1	9.4	9.4	9.4	13.508	24.704	205740000000	205730000000	4660500	0	NaN	0.735636	-4.03743	A0A0A0MS14	A0A0A0MS14		IGHV1-45
NaN	NaN	NaN	NaN	NaN	NaN			3	1	1	3.7	2.1	2.1	116.5	5.8222	22846000	11398000	11448000	0	NaN	0	NaN	A0A0A0MS24;O60237;H7C4R6;O60237-2;O60237-5	A0A0A0MS24;O60237	Protein phosphatase 1 regulatory subunit 12B	PPP1R12B
NaN	NaN	NaN	NaN	NaN	NaN			2	2	2	4.2	4.2	4.2	47.606	2.8252	70776000	0	70776000	0	NaN	0	NaN	A0A0G2JKZ1;A2AB90;A0A0G2JH37;A0A0A0MSV9;O15533-2;O15533;O15533-3;Q6P1N7;C9JA35;A0A0A0MT98;O15533-4	A0A0G2JKZ1;A2AB90;A0A0G2JH37;A0A0A0MSV9;O15533-2;O15533;O15533-3;Q6P1N7;C9JA35;A0A0A0MT98;O15533-4	Tapasin	TAPBP
NaN	NaN	NaN	NaN	NaN	NaN			2	2	2	22.4	22.4	22.4	24.381	14.591	86152000	85951000	200910	0	NaN	0	NaN	Q5T770;A0A0A0MT32;Q5T073;P38571-2;P38571	Q5T770;A0A0A0MT32;Q5T073;P38571-2;P38571	Lysosomal acid lipase/cholesteryl ester hydrolase	LIPA
NaN	NaN	NaN	NaN	NaN	NaN			2	2	2	8.7	8.7	8.7	31.869	8.2632	134980000	39855000	95121000	0	NaN	0	NaN	D6RDV0;D6RA37;A0A0A0MTC2;D6RIY7;Q13454-2;Q13454	D6RDV0;D6RA37;A0A0A0MTC2;D6RIY7;Q13454-2;Q13454	Tumor suppressor candidate 3	TUSC3
NaN	NaN	NaN	NaN	NaN	NaN			1	1	1	3.5	3.5	3.5	52.69	3.1687	41373000	18225000	23148000	0	NaN	0	NaN	A0A0A0MTF7;Q9UQR1	A0A0A0MTF7;Q9UQR1	Zinc finger protein 148	ZNF148
NaN	NaN	NaN	NaN	NaN	NaN			1	1	1	16.5	16.5	16.5	11.15	3.634	53422000	50955000	2467200	0	NaN	0	NaN	B8ZWD1;A0A0A0MTI5;P07108;P07108-3;P07108-2;P07108-6;P07108-4;P07108-5	B8ZWD1;A0A0A0MTI5;P07108;P07108-3;P07108-2;P07108-6;P07108-4;P07108-5	Acyl-CoA-binding protein	DBI
NaN	NaN	NaN	NaN	NaN	NaN			2	2	2	5.9	5.9	5.9	49.91	45.631	51737000	51737000	0	0	NaN	0	NaN	A0A0B4J1R6;P29401;P29401-2	A0A0B4J1R6;P29401;P29401-2	Transketolase	TKT
NaN	NaN	NaN	NaN	5.45828	0.62854			5	5	5	10.9	10.9	10.9	72.54	21.32	205650000	49489000	156160000	0	NaN	0.359115	2.94341	A0A0C4DFM1;Q92544;F8WCN2;F2Z2L1	A0A0C4DFM1;Q92544	Transmembrane 9 superfamily member 4	TM9SF4
NaN	NaN	NaN	NaN	NaN	-0.168642			2	2	2	12.8	12.8	12.8	22.488	2.5652	24890000	15892000	8998800	0	NaN	0	-0.268642	A0A0C4DFM9;Q9BUZ4-2;Q9BUZ4;J9JIG0;Q2KJU6;F6SA91	A0A0C4DFM9;Q9BUZ4-2;Q9BUZ4;J9JIG0;Q2KJU6;F6SA91	TNF receptor-associated factor 4	TRAF4
NaN	NaN	NaN	NaN	NaN	NaN			1	1	1	1.9	1.9	1.9	84.159	2.453	52650000	43616000	9033400	0	NaN	0	NaN	A0A0C4DFN1;Q8IWA4	A0A0C4DFN1;Q8IWA4	Mitofusin-1	MFN1
NaN	NaN	NaN	NaN	NaN	NaN			1	1	1	4.2	4.2	4.2	48.116	3.9731	8281600	0	8281600	0	NaN	0	NaN	A0A0G2JR20;A0A0C4DG71;A0A0G2JQM2;A0A0G2JR50;Q86SQ7-3;Q86SQ7-4;Q86SQ7	A0A0G2JR20;A0A0C4DG71;A0A0G2JQM2;A0A0G2JR50;Q86SQ7-3;Q86SQ7-4;Q86SQ7	Serologically defined colon cancer antigen 8	SDCCAG8
NaN	NaN	NaN	NaN	NaN	NaN			1	1	1	3.5	3.5	3.5	64.033	5.1752	8296200	7604700	691480	0	NaN	0	NaN	F5H3E1;F5H2E6;A0A0C4DGG8;Q8IX12-2;Q8IX12	F5H3E1;F5H2E6;A0A0C4DGG8;Q8IX12-2;Q8IX12	Cell division cycle and apoptosis regulator protein 1	CCAR1
NaN	NaN	NaN	NaN	NaN	NaN			1	1	1	1.2	1.2	1.2	217.1	9.1496	5627000	5627000	0	0	NaN	0	NaN	F5GWX5;A0A0C4DGG9;Q14839;Q14839-2	F5GWX5;A0A0C4DGG9;Q14839;Q14839-2	Chromodomain-helicase-DNA-binding protein 4	CHD4
NaN	NaN	NaN	NaN	NaN	NaN			1	1	1	12.7	12.7	12.7	12.478	2.4122	12088000	0	12088000	0	NaN	0	NaN	K7EQ66;K7ELZ9;K7ENM2;A0A0C4DGP7;K7EMW4;Q969V3-2;Q969V3	K7EQ66;K7ELZ9;K7ENM2;A0A0C4DGP7;K7EMW4;Q969V3-2;Q969V3	Nicalin	NCLN
NaN	NaN	NaN	NaN	NaN	NaN			1	1	1	6.9	6.9	6.9	23.885	7.9854	27286000	12570000	14716000	0	NaN	0	NaN	K7EQI2;A0A0C4DGP8;K7EJF0;Q96ST8-3;Q96ST8	K7EQI2;A0A0C4DGP8;K7EJF0;Q96ST8-3;Q96ST8	Centrosomal protein of 89 kDa	CEP89
NaN	NaN	NaN	NaN	NaN	NaN			1	1	1	2.8	2.8	2.8	87.387	3.628	3525800	3525800	0	0	NaN	0	NaN	A0A0C4DGX4;Q13616	A0A0C4DGX4;Q13616	Cullin-1	CUL1
NaN	NaN	NaN	NaN	NaN	NaN			2	2	2	6	6	6	31.61	3.9727	77548000	31147000	46401000	0	NaN	0	NaN	A0A0C4DGX8;Q15904	A0A0C4DGX8;Q15904	V-type proton ATPase subunit S1	ATP6AP1
NaN	NaN	NaN	NaN	NaN	NaN			2	2	2	8.8	8.8	8.8	34.315	2.7612	64831000	40351000	24480000	0	NaN	0	NaN	A0A0C4DGZ1;Q8N5P1	A0A0C4DGZ1;Q8N5P1	Zinc finger CCCH domain-containing protein 8	ZC3H8
NaN	NaN	NaN	NaN	NaN	NaN			2	2	2	3.5	3.5	3.5	80.547	3.2382	48160000	20122000	28038000	0	NaN	0	NaN	A0A0C4DH09;X6RGP5;F1T0I1;J3KNL6;O15027-2;O15027-4;O15027-3;O15027;O15027-5	A0A0C4DH09;X6RGP5;F1T0I1;J3KNL6;O15027-2;O15027-4;O15027-3;O15027;O15027-5	Protein transport protein Sec16A	SEC16A
NaN	NaN	NaN	NaN	NaN	NaN			3	3	3	1.8	1.8	1.8	132.16	2.3178	31697000	20680000	11017000	0	NaN	0	NaN	E7ENQ1;G3XAA2;H7C360;G5E948;E7EN19;E7ESS2;A0A0D9SEY1;O95819-4;O95819-2;O95819;O95819-5;O95819-3;H7C3Z6;C9J840;E7EX83;A0A0D9SG62;H7C0P6;H7C0Q0;REV__H0YA81;C9J338;I3L2I2;REV__O95232;REV__J3KPP4;REV__Q9H3P7;Q9H3P7;Q9UKE5-8;Q8N4C8-5;Q9UKE5-5;Q8N4C8-2;Q9UKE5-7;Q8N4C8-3;Q9UKE5-3;Q8N4C8-4;Q9UKE5-6;Q9UKE5-2;Q8N4C8;Q9UKE5-4;Q9UKE5	E7ENQ1;G3XAA2;H7C360;G5E948;E7EN19;E7ESS2;A0A0D9SEY1;O95819-4;O95819-2;O95819;O95819-5;O95819-3;H7C3Z6;C9J840;E7EX83;A0A0D9SG62;H7C0P6	Mitogen-activated protein kinase kinase kinase kinase 4	MAP4K4
NaN	NaN	NaN	NaN	NaN	NaN			1	1	1	1.5	1.5	1.5	107.43	4.9804	15795000	6821700	8973300	0	NaN	0	NaN	E7EXA6;A0A0D9SF58;Q8WVB6-3;Q8WVB6;Q8WVB6-2	E7EXA6;A0A0D9SF58;Q8WVB6-3;Q8WVB6;Q8WVB6-2	Chromosome transmission fidelity protein 18 homolog	CHTF18
NaN	NaN	NaN	NaN	NaN	NaN			1	1	1	40.6	40.6	40.6	7.29	45.331	14517000	14517000	0	0	NaN	0	NaN	A0A0D9SF88;A0A0D9SFW0;Q9HCE5	A0A0D9SF88;A0A0D9SFW0;Q9HCE5	N6-adenosine-methyltransferase subunit METTL14	METTL14
NaN	NaN	NaN	NaN	NaN	NaN			2	2	2	2.1	2.1	2.1	113.31	2.8218	27400000	10674000	16726000	0	NaN	0	NaN	A0A0D9SFS3;E9PDF2;E9PCR7;Q02218-3;Q02218-2;Q02218;C9J4G7;E9PFG7	A0A0D9SFS3;E9PDF2;E9PCR7;Q02218-3;Q02218-2;Q02218;C9J4G7;E9PFG7	2-oxoglutarate dehydrogenase, mitochondrial	OGDH
NaN	NaN	NaN	NaN	NaN	NaN			1	1	1	4.3	4.3	4.3	36.43	7.7781	47304000	25551000	21753000	0	NaN	0	NaN	Q5JRC6;A0A0D9SGE8;Q8IWS0-4;Q8IWS0-2;Q8IWS0-5;Q8IWS0-3;Q8IWS0	Q5JRC6;A0A0D9SGE8;Q8IWS0-4;Q8IWS0-2;Q8IWS0-5;Q8IWS0-3;Q8IWS0	PHD finger protein 6	PHF6
NaN	NaN	NaN	NaN	NaN	NaN			1	1	1	5.3	5.3	5.3	27.68	4.6029	300600000	129790000	170810000	0	NaN	0	NaN	Q31611;A0A0G2JNX1;Q5SRN7;A0A0G2JI36;Q8MH48;A0A0G2JNF2;Q5RJ85;A0A0G2JPQ3;D0EV57;A0A0G2JPA3;Q6DU44;A0A0G2JIF0;Q5SRN5;A0A0G2JIF2;A0A0G2JH50;A0A0G2JL56;A2BF26;A0A0G2JH66;Q29960-2;P17693;P13747;Q95365;Q29940;Q29836;Q29718;Q04826;P30685;P30498;P30495;P30493;P30492;P30491;P30490;P30488;P30487;P30485;P30484;P30483;P30481;P30480;P30479;P30475;P30466;P30464;P30462;P30461;P30460;P18465;P18464;P18463;P10319;…	Q31611;A0A0G2JNX1;Q5SRN7;A0A0G2JI36;Q8MH48;A0A0G2JNF2;Q5RJ85;A0A0G2JPQ3;D0EV57;A0A0G2JPA3;Q6DU44;A0A0G2JIF0;Q5SRN5;A0A0G2JIF2;A0A0G2JH50;A0A0G2JL56;A2BF26;A0A0G2JH66;Q29960-2;P17693;P13747;Q95365;Q29940;Q29836;Q29718;Q04826;P30685;P30498;P30495;P30493;P30492;P30491;P30490;P30488;P30487;P30485;P30484;P30483;P30481;P30480;P30479;P30475;P30466;P30464;P30462;P30461;P30460;P18465;P18464;P18463;P10319;…	HLA class I histocompatibility antigen, Cw-16 alpha chain;HLA class I histocompatibility antigen, alpha chain G;HLA class I histocompatibility antigen, alpha chain E;HLA class I histocompatibility antigen, B-38 alpha chain;HLA class I histocompatibility antigen, B-59 alpha chain;HLA class I histocompatibility antigen, B-67 alpha chain;HLA class I histocompatibility antigen, B-82 alpha chain;HLA c…	HLA-G2.2;HLA-A;HLA-G;HLA-F;HLA-E;HLA-C;HLA-B;HLA-H
NaN	NaN	NaN	NaN	NaN	NaN			2	2	2	8.3	8.3	8.3	26.673	3.5487	192300000	59086000	133210000	0	NaN	0	NaN	Q5SRQ3;Q5SRQ6;N0E472;A0A0G2JM12;P67870	Q5SRQ3;Q5SRQ6;N0E472;A0A0G2JM12;P67870	Casein kinase II subunit beta	CSNK2B-LY6G5B-1181;CSNK2B;CSNK2B-LY6G5B--991
NaN	NaN	NaN	NaN	NaN	NaN			8	1	1	25.3	4.4	4.4	36.508	11.449	96619000	94882000	1736900	0	NaN	0	NaN	A0A0G2JMB2;P01877;A0A075B6N7	A0A0G2JMB2;P01877;A0A075B6N7	Ig alpha-2 chain C region	IGHA2
NaN	NaN	NaN	NaN	NaN	NaN			3	1	1	8	2.8	2.8	35.9	3.604	3031400000	2832800000	198610000	0	NaN	0	NaN	A0A0G2JN06;P01859	A0A0G2JN06;P01859	Ig gamma-2 chain C region	IGHG2
NaN	NaN	NaN	NaN	NaN	NaN			1	1	1	3.8	3.8	3.8	38.59	2.7021	160090000	33401000	126690000	0	NaN	0	NaN	A0A0G2JNY4;O19617;A2AEA2;Q31612;P10316;P01892;P10321;Q95604	A0A0G2JNY4;O19617;A2AEA2;Q31612;P10316;P01892;P10321;Q95604	HLA class I histocompatibility antigen, B-73 alpha chain;HLA class I histocompatibility antigen, A-69 alpha chain;HLA class I histocompatibility antigen, A-2 alpha chain;HLA class I histocompatibility antigen, Cw-7 alpha chain;HLA class I histocompatibility antigen, Cw-17 alpha chain	HLA-C;HLA-B;HLA-A
NaN	NaN	NaN	NaN	NaN	NaN			2	2	2	11.5	11.5	11.5	25.74	9.6061	66670000	18816000	47854000	0	NaN	0	NaN	A0A0G2JRI7;A0A0G2JQ62;Q8NF37	A0A0G2JRI7;A0A0G2JQ62;Q8NF37	Lysophosphatidylcholine acyltransferase 1	LPCAT1
NaN	NaN	NaN	NaN	NaN	NaN			1	1	1	12.1	12.1	12.1	11.856	4.0728	23631000	19658000	3972800	0	NaN	0	NaN	A0A0G2JQN5;Q9BV57-2;Q9BV57	A0A0G2JQN5;Q9BV57-2;Q9BV57	1,2-dihydroxy-3-keto-5-methylthiopentene dioxygenase	ADI1
NaN	NaN	NaN	NaN	NaN	NaN			1	1	1	4.3	4.3	4.3	43.265	4.5725	20629000	6286500	14343000	0	NaN	0	NaN	A0A0J9YWK3;H7C2C4;H7C1N2;O75128-5;O75128-4;O75128-3;O75128;O75128-7;O75128-2	A0A0J9YWK3;H7C2C4;H7C1N2;O75128-5;O75128-4;O75128-3;O75128;O75128-7;O75128-2	Protein cordon-bleu	COBL
NaN	NaN	NaN	NaN	NaN	NaN			2	2	2	36.4	36.4	36.4	7.8818	4.8773	58287000	16250000	42037000	0	NaN	0	NaN	C9JB42;C9JDR7;C9JDX6;F8WCZ4;C9J2P2;E9PH18;C9J2C4;A0A0J9YX62;O75190-2;O75190-3;O75190;C9JN01;Q8WWF6	C9JB42;C9JDR7;C9JDX6;F8WCZ4;C9J2P2;E9PH18;C9J2C4;A0A0J9YX62;O75190-2;O75190-3;O75190;C9JN01;Q8WWF6	DnaJ homolog subfamily B member 6;DnaJ homolog subfamily B member 3	DNAJB6;DNAJB3
NaN	NaN	NaN	NaN	NaN	NaN			1	1	1	11.4	11.4	11.4	23.585	3.0282	16440000	16074000	366350	0	NaN	0	NaN	A0A0U1RQD1;Q9NQ88	A0A0U1RQD1;Q9NQ88	Fructose-2,6-bisphosphatase TIGAR	TIGAR
NaN	NaN	NaN	NaN	NaN	0.861955			2	2	2	34.5	34.5	34.5	11.832	16.841	71213000	33425000	37788000	0	NaN	0	0.761955	A0A0U1RQV5;P56537-2;P56537	A0A0U1RQV5;P56537-2;P56537	Eukaryotic translation initiation factor 6	EIF6
NaN	NaN	NaN	NaN	NaN	NaN			2	2	2	3.2	3.2	3.2	88.051	3.5463	16850000	0	16850000	0	NaN	0	NaN	A0A0U1RRL8;Q8TB22-3;Q8TB22;Q8TB22-2;H0Y9M1;Q8TB22-4	A0A0U1RRL8;Q8TB22-3;Q8TB22;Q8TB22-2;H0Y9M1;Q8TB22-4	Spermatogenesis-associated protein 20	SPATA20
NaN	NaN	NaN	NaN	NaN	NaN			1	1	1	5	5	5	22.049	2.6376	5541100	892970	4648100	0	NaN	0	NaN	A0PJW6	A0PJW6	Transmembrane protein 223	TMEM223
NaN	NaN	NaN	NaN	NaN	NaN			1	1	1	7.4	7.4	7.4	25.56	2.4888	23710000	3879200	19831000	0	NaN	0	NaN	M0QZX5;M0R026;A1L0T0	M0QZX5;M0R026;A1L0T0	Acetolactate synthase-like protein	ILVBL
NaN	NaN	NaN	NaN	NaN	NaN			2	2	2	1.6	1.6	1.6	160.41	3.3621	23362000	612910	22749000	0	NaN	0	NaN	H0Y5G7;A2RRP1-2;A2RRP1	H0Y5G7;A2RRP1-2;A2RRP1	Neuroblastoma-amplified sequence	NBAS
NaN	NaN	NaN	NaN	NaN	NaN			10	1	1	11.2	2.1	2.1	121.44	3.3637	0	0	0	0	NaN	0	NaN	A5A3E0	A5A3E0	POTE ankyrin domain family member F	POTEF
NaN	NaN	NaN	NaN	NaN	NaN			1	1	1	1.6	1.6	1.6	67.017	2.2003	477760000	296650000	181110000	0	NaN	0	NaN	A6NC98-3;A6NC98-2;A6NC98-4;A6NC98	A6NC98-3;A6NC98-2;A6NC98-4;A6NC98	Coiled-coil domain-containing protein 88B	CCDC88B
NaN	NaN	NaN	NaN	NaN	NaN			1	1	1	4	4	4	34.313	2.9538	49792000	5265200	44527000	0	NaN	0	NaN	B1AK81;A6NEM5;Q92643-2;Q92643	B1AK81;A6NEM5;Q92643-2;Q92643	GPI-anchor transamidase	PIGK
NaN	NaN	NaN	NaN	0.0743684	0.0617071			2	2	2	10.4	10.4	10.4	30.638	7.2461	2581100000	1479900000	1101200000	0	NaN	0.904894	-0.0319623	A6NIZ0;Q9GZM8-3;Q9GZM8;Q9GZM8-2;J3KT16;I3L2R3;I3L2T8;J3KRK9;I3L533;J3QL85;I3L2R9;I3L522;J3QSD2;J3QRZ1;X5DR54;Q9NXR1-2;Q9NXR1	A6NIZ0;Q9GZM8-3;Q9GZM8;Q9GZM8-2;J3KT16;I3L2R3;I3L2T8;J3KRK9;I3L533;J3QL85;I3L2R9;I3L522;J3QSD2;J3QRZ1;X5DR54;Q9NXR1-2;Q9NXR1	Nuclear distribution protein nudE-like 1;Nuclear distribution protein nudE homolog 1	NDEL1;NDE1
NaN	NaN	NaN	NaN	NaN	NaN			1	1	1	8.1	8.1	8.1	32.5	3.4176	3420600	3009000	411550	0	NaN	0	NaN	A6PVX1;H0Y532;Q13228-2;Q13228-3;Q13228;Q13228-4	A6PVX1;H0Y532;Q13228-2;Q13228-3;Q13228;Q13228-4	Selenium-binding protein 1	SELENBP1
NaN	NaN	NaN	0.360308	NaN	NaN			5	5	5	14.4	14.4	14.4	61.257	31.008	744640000	565000000	179640000	0	NaN	0	0.260308	A6PW57;Q99755-2;Q99755-4;Q99755-3;Q99755;A2A3N6;A6PW58;A2A5X0;O14986-3;O14986;O14986-2;O60331-4;O60331;O60331-2;O60331-3	A6PW57;Q99755-2;Q99755-4;Q99755-3;Q99755	Phosphatidylinositol 4-phosphate 5-kinase type-1 alpha	PIP5K1A
NaN	NaN	NaN	NaN	NaN	NaN			4	4	4	19.6	19.6	19.6	29.2	7.2074	58302000	14841000	43461000	0	NaN	0	NaN	A8MYQ9;Q9BZG1-4;Q9BZG1;Q96PJ7;C9JBG0;C9JY26;E7ES60;Q9BZG1-2;V9GY61;K7EJW7;K7EIF2;H7C0Y7	A8MYQ9;Q9BZG1-4;Q9BZG1;Q96PJ7;C9JBG0;C9JY26;E7ES60;Q9BZG1-2	Ras-related protein Rab-34	RAB34
NaN	NaN	NaN	NaN	NaN	NaN			1	1	1	17.9	17.9	17.9	9.4786	4.0434	19482000	4854100	14628000	0	NaN	0	NaN	B8ZZ09;B8ZZ10;A8MYV2;Q9NQ29-2;Q9NQ29-3;Q9NQ29	B8ZZ09;B8ZZ10;A8MYV2;Q9NQ29-2;Q9NQ29-3;Q9NQ29	Putative RNA-binding protein Luc7-like 1	LUC7L
NaN	NaN	NaN	NaN	NaN	NaN			1	1	1	5.8	5.8	5.8	24.982	5.98	10088000	10088000	0	0	NaN	0	NaN	B1AH49;P25325;P25325-2	B1AH49;P25325;P25325-2	Sulfurtransferase;3-mercaptopyruvate sulfurtransferase	MPST
NaN	NaN	NaN	NaN	NaN	NaN			1	1	1	41.2	41.2	41.2	5.7065	4.948	4572500	4572500	0	0	NaN	0	NaN	B1AH56;B1AH58;H0Y6C7;F5GZ09;Q9BW83-2;Q9BW83	B1AH56;B1AH58;H0Y6C7;F5GZ09;Q9BW83-2;Q9BW83	Intraflagellar transport protein 27 homolog	IFT27
NaN	NaN	NaN	NaN	0.506805	NaN			13	1	1	16.1	0.9	0.9	110.86	2.4881	2893100000	1470300000	1422700000	0	NaN	0	0.406805	B1AKY9;P50993;H0Y7C1;Q13733;P20648;M0QXF2;E9PRA5	B1AKY9;P50993;H0Y7C1;Q13733	Sodium/potassium-transporting ATPase subunit alpha-2;Sodium/potassium-transporting ATPase subunit alpha-4	ATP1A2;ATP1A4
NaN	NaN	NaN	-3.49921	NaN	NaN			2	2	2	22.5	22.5	22.5	13.781	23.049	199830000	190950000	8877100	0	NaN	0	-3.59921	B3KYB6;B3KYB7;P48739;P48739-2;P48739-3;A0A0A0MSW4	B3KYB6;B3KYB7;P48739;P48739-2;P48739-3;A0A0A0MSW4	Phosphatidylinositol transfer protein beta isoform	PITPNB
NaN	NaN	NaN	NaN	NaN	NaN			1	1	1	21.3	21.3	21.3	13.367	6.3825	68947000	15564000	53383000	0	NaN	0	NaN	H0YD04;B4DE93;G3V0I5;P49821-2;P49821	H0YD04;B4DE93;G3V0I5;P49821-2;P49821	NADH dehydrogenase [ubiquinone] flavoprotein 1, mitochondrial	NDUFV1
NaN	NaN	NaN	NaN	NaN	NaN			1	1	1	14.4	14.4	14.4	23.384	43.588	81068000	81068000	0	0	NaN	0	NaN	B4DFG2;K7ENL2;K7EMC9;Q969T9	B4DFG2;K7ENL2;K7EMC9;Q969T9	WW domain-binding protein 2	WBP2
NaN	NaN	NaN	NaN	NaN	NaN			2	2	2	8	8	8	33.433	7.9325	55393000	37728000	17665000	0	NaN	0	NaN	J3QKS7;B4DGM3;Q969G3-6;Q969G3-5;Q969G3-3;Q969G3-2;Q969G3-4;Q969G3;J3KT85;J3QR61;H7C048;K7EMQ8	J3QKS7;B4DGM3;Q969G3-6;Q969G3-5;Q969G3-3;Q969G3-2;Q969G3-4;Q969G3;J3KT85;J3QR61;H7C048;K7EMQ8	SWI/SNF-related matrix-associated actin-dependent regulator of chromatin subfamily E member 1	SMARCE1
NaN	NaN	NaN	-4.60451	NaN	NaN			3	3	3	24	24	24	14.5	38.433	130050000	128790000	1254800	0	NaN	0	-4.70451	B4DM58;P00374-2;P00374	B4DM58;P00374-2;P00374	Dihydrofolate reductase	DHFR
NaN	NaN	NaN	NaN	NaN	NaN			3	3	3	43.8	43.8	43.8	21.531	17.057	34298000	34298000	0	0	NaN	0	NaN	Q49AI2;B4DML3;Q86WA6-2;Q86WA6	Q49AI2;B4DML3;Q86WA6-2;Q86WA6	Valacyclovir hydrolase	BPHL
NaN	NaN	NaN	NaN	NaN	NaN			2	2	2	14.2	14.2	14.2	18.465	3.7598	4606900	731610	3875300	0	NaN	0	NaN	B5MCD7;O43759-2;O43759;A2A283;F8WCE4;O43759-3	B5MCD7;O43759-2;O43759;A2A283;F8WCE4;O43759-3	Synaptogyrin-1	SYNGR1
NaN	NaN	NaN	NaN	NaN	NaN			2	2	2	9.6	9.6	9.6	29.559	8.935	127750000	22354000	105400000	0	NaN	0	NaN	B5MD23;O75954	B5MD23;O75954	Tetraspanin;Tetraspanin-9	TSPAN9
NaN	NaN	NaN	NaN	NaN	4.79992			1	1	1	21.3	21.3	21.3	5.1578	2.4368	34437000	1265200	33171000	0	NaN	0	4.69992	E9PP42;E9PNA8;E9PLH2;M0QYU9;M0R0R3;M0R2G5;B7WNH4;Q9BQ49	E9PP42;E9PNA8;E9PLH2;M0QYU9;M0R0R3;M0R2G5;B7WNH4;Q9BQ49	Small integral membrane protein 7	SMIM7
NaN	NaN	NaN	NaN	NaN	NaN			1	1	1	7.9	7.9	7.9	16.163	2.4058	7614300	1330000	6284300	0	NaN	0	NaN	B8ZZF5;C9J5M4;Q9H8M9	B8ZZF5;C9J5M4;Q9H8M9	Protein eva-1 homolog A	EVA1A
NaN	NaN	NaN	NaN	NaN	NaN			3	3	3	37.3	37.3	37.3	18.398	67.888	192780000	192150000	630860	0	NaN	0	NaN	B8ZZK2;O75223;H7BZK5;O75223-2;O75223-4;A0A0B4J1Y4;M0QZK8;O75223-3	B8ZZK2;O75223;H7BZK5;O75223-2;O75223-4	Gamma-glutamylcyclotransferase	GGCT
NaN	NaN	NaN	-2.99493	NaN	NaN			1	1	1	3.1	3.1	3.1	56.413	19.653	50942000	47791000	3150800	0	NaN	0	-3.09493	B8ZZY2;P52594-2;P52594-3;P52594;P52594-4	B8ZZY2;P52594-2;P52594-3;P52594;P52594-4	Arf-GAP domain and FG repeat-containing protein 1	AGFG1
NaN	NaN	NaN	NaN	NaN	NaN			1	1	1	18.1	18.1	18.1	12.649	9.04	6068900	6068900	0	0	NaN	0	NaN	Q5THN1;C9IZA0;Q9Y5Z4-2;Q9Y5Z4	Q5THN1;C9IZA0;Q9Y5Z4-2;Q9Y5Z4	Heme-binding protein 2	HEBP2
NaN	NaN	NaN	NaN	NaN	NaN			1	1	1	38.8	38.8	38.8	7.1315	3.7587	11551000	11551000	0	0	NaN	0	NaN	C9IZI0;F8WFC2;C9JLV6;C9JF79;P40925;P40925-3	C9IZI0;F8WFC2;C9JLV6;C9JF79;P40925;P40925-3	Malate dehydrogenase;Malate dehydrogenase, cytoplasmic	MDH1
NaN	NaN	NaN	NaN	0.8614	-0.543152			2	2	2	10.9	10.9	10.9	20.772	4.5805	222850000	120200000	102650000	0	NaN	0.0238658	0.0591239	C9J0A7;Q9UQN3-2;Q9UQN3;A0A087WW88	C9J0A7;Q9UQN3-2;Q9UQN3;A0A087WW88	Charged multivesicular body protein 2b	CHMP2B
NaN	NaN	NaN	NaN	NaN	NaN			1	1	1	12.6	12.6	12.6	24.465	6.0403	18066000	18066000	0	0	NaN	0	NaN	C9JRH2;C9JMJ4;C9J3R0;C9JQZ4;C9JW69;P18754;P18754-2	C9JRH2;C9JMJ4;C9J3R0;C9JQZ4;C9JW69;P18754;P18754-2	Regulator of chromosome condensation	RCC1
NaN	NaN	NaN	NaN	NaN	NaN			1	1	1	32.3	32.3	32.3	7.0719	2.9953	2122000	2122000	0	0	NaN	0	NaN	C9JJE5;C9JLU6;C9J4N6;O75874	C9JJE5;C9JLU6;C9J4N6;O75874	Isocitrate dehydrogenase [NADP] cytoplasmic	IDH1
NaN	NaN	NaN	NaN	NaN	NaN			1	1	1	21	21	21	8.9804	2.5007	4139800	4139800	0	0	NaN	0	NaN	C9J5B6;C9JGM0;Q96GK7;Q6P2I3	C9J5B6;C9JGM0;Q96GK7;Q6P2I3	Fumarylacetoacetate hydrolase domain-containing protein 2A;Fumarylacetoacetate hydrolase domain-containing protein 2B	FAHD2A;FAHD2B
NaN	NaN	NaN	NaN	NaN	NaN			1	1	1	6.8	6.8	6.8	15.935	3.539	385750000	152000000	233750000	0	NaN	0	NaN	C9JJV6;C9JZL8;C9J5M0;C9JC07;Q96S97	C9JJV6;C9JZL8;C9J5M0;C9JC07;Q96S97	Myeloid-associated differentiation marker	MYADM
NaN	NaN	NaN	NaN	NaN	NaN			2	2	2	16.4	16.4	16.4	18.584	4.5276	19019000	443140	18576000	0	NaN	0	NaN	F8WEX5;E9PG02;E9PBT8;C9JL30;J3KQJ1;C9J660;F8WA42;Q8NBJ7;Q8NBJ7-3;F8WEV7;F8WES7;J3QT17;H7C3B2;A8MXB9;Q8NBJ7-2;Q8NBJ7-5;Q8NBJ7-4	F8WEX5;E9PG02;E9PBT8;C9JL30;J3KQJ1;C9J660;F8WA42;Q8NBJ7;Q8NBJ7-3;F8WEV7;F8WES7;J3QT17;H7C3B2;A8MXB9;Q8NBJ7-2;Q8NBJ7-5;Q8NBJ7-4	Sulfatase-modifying factor 2	SUMF2
NaN	NaN	NaN	NaN	NaN	NaN			1	1	1	6.9	6.9	6.9	23.539	5.6313	23637000	7948900	15688000	0	NaN	0	NaN	C9J8H1;P36543-2;P36543	C9J8H1;P36543-2;P36543	V-type proton ATPase subunit E 1	ATP6V1E1
NaN	NaN	NaN	NaN	NaN	NaN			1	1	1	4.4	4.4	4.4	22.737	2.4713	16048000	6101600	9946200	0	NaN	0	NaN	C9JE21;C9JAA9;Q9NW13-2;Q9NW13	C9JE21;C9JAA9;Q9NW13-2;Q9NW13	RNA-binding protein 28	RBM28
NaN	NaN	NaN	NaN	NaN	NaN			1	1	1	33.3	33.3	33.3	5.5992	3.2322	2202700	2202700	0	0	NaN	0	NaN	C9JAL2;C9JIA8;Q2TAL8	C9JAL2;C9JIA8;Q2TAL8	Glutamine-rich protein 1	QRICH1
NaN	NaN	NaN	2.75994	NaN	NaN			1	1	1	21.7	21.7	21.7	8.8131	8.2694	227100000	46318000	180780000	0	NaN	0	2.65994	C9JAW5;C9JNU6;Q9Y241	C9JAW5;C9JNU6;Q9Y241	HIG1 domain family member 1A, mitochondrial	HIGD1A
NaN	NaN	NaN	NaN	NaN	NaN			1	1	1	19.4	19.4	19.4	11.901	6.3089	23570000	23570000	0	0	NaN	0	NaN	H7C585;C9JAX1;Q16595	H7C585;C9JAX1;Q16595	Frataxin, mitochondrial;Frataxin intermediate form;Frataxin(56-210);Frataxin(78-210);Frataxin mature form	FXN
NaN	NaN	NaN	NaN	NaN	NaN			1	1	1	11	11	11	8.6247	3.0604	572070000	218140000	353920000	0	NaN	0	NaN	C9JB87;Q0VAA5-2;Q0VAA5	C9JB87;Q0VAA5-2;Q0VAA5	PI-PLC X domain-containing protein 2	PLCXD2
NaN	NaN	NaN	NaN	NaN	NaN			1	1	1	28.3	28.3	28.3	6.256	11.06	19353000	17121000	2232000	0	NaN	0	NaN	C9JBU9;C9JQ41;H7C525;Q4VC31	C9JBU9;C9JQ41;H7C525;Q4VC31	Coiled-coil domain-containing protein 58	CCDC58
NaN	NaN	NaN	NaN	NaN	NaN			1	1	1	10.7	10.7	10.7	12.728	3.8723	114200000	15272000	98929000	0	NaN	0	NaN	C9JC63;E7EVY0;S4R3Q9;J3KNA0;Q15070-3;Q15070-2;Q15070	C9JC63;E7EVY0;S4R3Q9;J3KNA0;Q15070-3;Q15070-2;Q15070	Mitochondrial inner membrane protein OXA1L	OXA1L
NaN	NaN	NaN	NaN	NaN	NaN			1	1	1	7.1	7.1	7.1	16.658	2.4208	182960000	76359000	106600000	0	NaN	0	NaN	E9PNC7;E9PQX9;C9JCC6;Q14919;Q14919-2	E9PNC7;E9PQX9;C9JCC6;Q14919;Q14919-2	Dr1-associated corepressor	DRAP1
NaN	NaN	NaN	NaN	1.982	NaN			1	1	1	5.1	5.1	5.1	28.146	2.5296	63888000	8783700	55104000	0	NaN	0	1.882	C9JDR0;Q15738	C9JDR0;Q15738	Sterol-4-alpha-carboxylate 3-dehydrogenase, decarboxylating	NSDHL
NaN	NaN	NaN	NaN	NaN	NaN			2	2	2	15.6	15.6	15.6	23.653	4.4985	105390000	59050000	46337000	0	NaN	0	NaN	C9JEV9;O95639-3;O95639-2;O95639;F8WEL7;B7Z7B0;H7C419	C9JEV9;O95639-3;O95639-2;O95639;F8WEL7;B7Z7B0;H7C419	Cleavage and polyadenylation specificity factor subunit 4	CPSF4
NaN	NaN	NaN	NaN	NaN	NaN			2	2	2	17.8	17.8	17.8	11.333	10.931	76677000	76677000	0	0	NaN	0	NaN	C9JFR7;P99999	C9JFR7;P99999	Cytochrome c	CYCS
NaN	NaN	NaN	NaN	NaN	NaN			1	1	1	6.2	6.2	6.2	16.9	2.493	64553000	12189000	52364000	0	NaN	0	NaN	C9JXG8;C9JGV6;F6WQW2;P43487-2;P43487	C9JXG8;C9JGV6;F6WQW2;P43487-2;P43487	Ran-specific GTPase-activating protein	RANBP1
NaN	NaN	NaN	NaN	NaN	NaN			1	1	1	5	5	5	27.774	5.5944	16676000	13317000	3359500	0	NaN	0	NaN	H7C469;F8WD96;C9JH19;P07339	H7C469;F8WD96;C9JH19;P07339	Cathepsin D;Cathepsin D light chain;Cathepsin D heavy chain	CTSD
NaN	NaN	NaN	NaN	NaN	NaN			1	1	1	32.7	32.7	32.7	5.7044	19.549	37645000	35858000	1786700	0	NaN	0	NaN	C9JL85;P58546	C9JL85;P58546	Myotrophin	MTPN
NaN	NaN	NaN	NaN	NaN	NaN			1	1	1	11.4	11.4	11.4	12.421	5.1599	20704000	5677100	15027000	0	NaN	0	NaN	C9JLF4;Q9NVH0-2;Q9NVH0	C9JLF4;Q9NVH0-2;Q9NVH0	Exonuclease 3-5 domain-containing protein 2	EXD2
NaN	NaN	NaN	NaN	NaN	NaN			2	2	2	24	24	24	11.503	3.9539	44702000	12239000	32464000	0	NaN	0	NaN	C9JNQ3;Q14558;Q14558-2;C9JKT9;C9JUN4;C9J168;B4DP31	C9JNQ3;Q14558;Q14558-2;C9JKT9;C9JUN4;C9J168;B4DP31	Phosphoribosyl pyrophosphate synthase-associated protein 1	PRPSAP1
NaN	NaN	NaN	NaN	NaN	NaN			2	2	2	33.9	33.9	33.9	6.8708	3.4982	33801000	0	33801000	0	NaN	0	NaN	F8WF90;C9JQU6;F8WF33;O75915	F8WF90;C9JQU6;F8WF33;O75915	PRA1 family protein 3	ARL6IP5
NaN	NaN	NaN	NaN	NaN	NaN			1	1	1	20.6	20.6	20.6	19.73	44.876	46850000	46850000	0	0	NaN	0	NaN	G3V5L5;G3V2X6;C9JSX3;H0YJX6;O14744-2;O14744	G3V5L5;G3V2X6;C9JSX3;H0YJX6;O14744-2;O14744	Protein arginine N-methyltransferase 5;Protein arginine N-methyltransferase 5, N-terminally processed	PRMT5
NaN	NaN	NaN	NaN	NaN	NaN			1	1	1	12.9	12.9	12.9	12.302	2.202	0	0	0	0	NaN	0	NaN	C9JTK6;J3KQ32;Q9NTK5-3;Q9NTK5	C9JTK6;J3KQ32;Q9NTK5-3;Q9NTK5	Obg-like ATPase 1	OLA1
NaN	NaN	NaN	NaN	NaN	NaN			2	2	2	11.5	11.5	11.5	18.429	2.3634	13560000	0	13560000	0	NaN	0	NaN	C9K0C3;Q6UWP7-2;Q6UWP7-3;Q6UWP7	C9K0C3;Q6UWP7-2;Q6UWP7-3;Q6UWP7	Lysocardiolipin acyltransferase 1	LCLAT1
NaN	NaN	NaN	-3.82407	NaN	NaN			2	2	2	10.4	10.4	10.4	26.839	47.896	248500000	245570000	2930100	0	NaN	0	-3.92407	D6R956;P09936;D6RE83	D6R956;P09936;D6RE83	Ubiquitin carboxyl-terminal hydrolase;Ubiquitin carboxyl-terminal hydrolase isozyme L1	UCHL1
NaN	NaN	NaN	NaN	NaN	NaN			1	1	1	15.1	15.1	15.1	11.385	3.5223	21291000	11617000	9673900	0	NaN	0	NaN	D6RA77;Q9BPZ3	D6RA77;Q9BPZ3	Polyadenylate-binding protein-interacting protein 2	PAIP2
NaN	NaN	NaN	NaN	NaN	NaN			1	1	1	6.2	6.2	6.2	15.917	2.3817	164570000	66229000	98344000	0	NaN	0	NaN	E9PGB1;E7EUB3;E7ESU7;D6RAX2;E7EPF8;Q5SQP8;Q13363-2;Q13363;P56545;P56545-2	E9PGB1;E7EUB3;E7ESU7;D6RAX2;E7EPF8;Q5SQP8;Q13363-2;Q13363;P56545;P56545-2	C-terminal-binding protein 1;C-terminal-binding protein 2	CTBP1;CTBP2
NaN	NaN	NaN	NaN	NaN	NaN			3	3	3	14.8	14.8	14.8	28.102	9.4806	71056000	8573200	62483000	0	NaN	0	NaN	D6RCD0;Q8NBQ5	D6RCD0;Q8NBQ5	Estradiol 17-beta-dehydrogenase 11	HSD17B11
NaN	NaN	NaN	NaN	NaN	NaN			2	2	2	7.1	7.1	7.1	35.42	3.839	9104600	0	9104600	0	NaN	0	NaN	D6RF48;Q9P2W9;D6RC71	D6RF48;Q9P2W9;D6RC71	Syntaxin-18	STX18
NaN	NaN	NaN	NaN	NaN	-0.484187			2	2	2	18.6	18.6	18.6	11.57	3.487	44914000	24879000	20035000	0	NaN	0	-0.584187	D6RHW1;D6RIY1;D6RGK3;D6RIV9;D6RIE8;Q9HBM6;Q16594	D6RHW1;D6RIY1;D6RGK3;D6RIV9;D6RIE8;Q9HBM6;Q16594	Transcription initiation factor TFIID subunit 9B;Transcription initiation factor TFIID subunit 9	TAF9;TAF9B
NaN	NaN	NaN	NaN	NaN	1.1165			3	3	2	16.3	16.3	11.8	30.213	9.0505	81936000	36711000	45226000	0	NaN	0	1.0165	E2QRB3;P32322-2;P32322;J3QR88;J3QLK9;J3QL32;J3QL24;J3QKT4;J3KQ22;P32322-3;J3KTA8;J3QKT3;J3QRZ0;J3QL23	E2QRB3;P32322-2;P32322;J3QR88;J3QLK9;J3QL32;J3QL24;J3QKT4;J3KQ22;P32322-3	Pyrroline-5-carboxylate reductase 1, mitochondrial;Pyrroline-5-carboxylate reductase	PYCR1
NaN	NaN	NaN	NaN	NaN	NaN			1	1	1	4.8	4.8	4.8	23.085	2.2849	28071000	12603000	15469000	0	NaN	0	NaN	E2QRI1;Q32P28-2;Q32P28-4;Q32P28;Q32P28-3	E2QRI1;Q32P28-2;Q32P28-4;Q32P28;Q32P28-3	Prolyl 3-hydroxylase 1	P3H1;LEPRE1
NaN	NaN	NaN	NaN	NaN	NaN			1	1	1	7.1	7.1	7.1	23.007	3.5774	113280000	32489000	80792000	0	NaN	0	NaN	E5RFR9;Q00005-6;Q00005;Q00005-2;P63151;Q00005-3;Q66LE6;P63151-2;Q00005-4;Q00005-5;Q00005-7	E5RFR9;Q00005-6;Q00005;Q00005-2;P63151;Q00005-3;Q66LE6;P63151-2;Q00005-4;Q00005-5;Q00005-7	Serine/threonine-protein phosphatase 2A 55 kDa regulatory subunit B beta isoform;Serine/threonine-protein phosphatase 2A 55 kDa regulatory subunit B alpha isoform;Serine/threonine-protein phosphatase 2A 55 kDa regulatory subunit B delta isoform	PPP2R2A;PPP2R2B;PPP2R2D
NaN	NaN	NaN	NaN	NaN	NaN			1	1	1	24.6	24.6	24.6	8.0153	2.599	3903100	2353100	1550100	0	NaN	0	NaN	E5RH13;E5RIC4;G3XAM4;E5RGP0;Q9BRU9-2;Q9BRU9	E5RH13;E5RIC4;G3XAM4;E5RGP0;Q9BRU9-2;Q9BRU9	rRNA-processing protein UTP23 homolog	UTP23
NaN	NaN	NaN	NaN	NaN	NaN			4	4	4	32.5	32.5	32.5	20.861	144.31	416450000	407600000	8843100	0	NaN	0	NaN	E5RGR0;O75608-2;O75608;E5RJ48;A0A087X1K9;B4DP64	E5RGR0;O75608-2;O75608;E5RJ48;A0A087X1K9;B4DP64	Acyl-protein thioesterase 1	LYPLA1
NaN	NaN	NaN	NaN	NaN	NaN			2	2	2	13.3	13.3	13.3	25.827	8.545	230210000	79065000	151140000	0	NaN	0	NaN	H0YB83;E5RH53;Q96DB5-3;Q96DB5-2;Q96DB5;E5RGC8;H0YB03	H0YB83;E5RH53;Q96DB5-3;Q96DB5-2;Q96DB5;E5RGC8;H0YB03	Regulator of microtubule dynamics protein 1	RMDN1
NaN	NaN	NaN	NaN	NaN	NaN			6	3	3	24.3	15.1	15.1	37.725	11.338	117280000	1195300	116080000	0	NaN	0	NaN	E5RHW4;O94905;E5RJ09;O94905-2;O94905-3	E5RHW4;O94905	Erlin-2	ERLIN2
NaN	NaN	NaN	NaN	NaN	NaN			2	2	2	20.6	20.6	20.6	17.487	8.9139	47493000	9795600	37698000	0	NaN	0	NaN	E5RI16;Q9NUQ9;E5RK61;E5RFS4;E5RHU5;E5RGI7;E5RJE1;E5RIR8;E5RJL8	E5RI16;Q9NUQ9;E5RK61;E5RFS4;E5RHU5;E5RGI7;E5RJE1;E5RIR8;E5RJL8	Protein FAM49B	FAM49B
NaN	NaN	NaN	NaN	2.08974	3.33314			3	3	3	29	29	29	17	60.792	765540000	106990000	658550000	0	NaN	0.827428	2.61144	E5RIP4;Q15043-2;Q15043-3;Q15043;E5RFZ8;E5RGA7;E5RJ40;E5RJG5	E5RIP4;Q15043-2;Q15043-3;Q15043;E5RFZ8;E5RGA7;E5RJ40;E5RJG5	Zinc transporter ZIP14	SLC39A14
NaN	NaN	NaN	NaN	NaN	NaN			1	1	1	15.2	15.2	15.2	10.993	6.0613	130280000	88029000	42248000	0	NaN	0	NaN	E5RIV7;Q8IV48	E5RIV7;Q8IV48	3-5 exoribonuclease 1	ERI1
NaN	NaN	NaN	NaN	NaN	NaN			1	1	1	7.7	7.7	7.7	18.336	2.4043	5291800	1435200	3856500	0	NaN	0	NaN	E5RK82;E5RJF8;O15182	E5RK82;E5RJF8;O15182	Centrin-3	CETN3
NaN	NaN	NaN	NaN	0.616264	NaN			2	2	2	7.3	7.3	7.3	44.992	6.7058	163550000	92692000	70858000	0	NaN	0	0.516264	E7EMB6;E7ETB3;Q9ULA0;B9ZVU2;F8WAN0	E7EMB6;E7ETB3;Q9ULA0;B9ZVU2;F8WAN0	Aspartyl aminopeptidase	DNPEP
NaN	NaN	NaN	NaN	NaN	NaN			2	2	2	15.4	15.4	15.4	15.838	2.4606	18106000	3930300	14176000	0	NaN	0	NaN	K7ENA7;E7ENJ6;Q9BXS5;Q9BXS5-2;K7ER75;K7EPJ8;A0A087WZX7;K7EJL1	K7ENA7;E7ENJ6;Q9BXS5;Q9BXS5-2;K7ER75;K7EPJ8;A0A087WZX7;K7EJL1	AP-1 complex subunit mu-1	AP1M1
NaN	NaN	NaN	1.47794	0.436908	-0.337248			4	4	4	15.3	15.3	15.3	27.091	4.5958	227830000	68620000	159210000	0	NaN	0.298363	0.425866	E7ENR5;H0Y714;Q96G21;B9A008;B8ZZ47	E7ENR5;H0Y714;Q96G21;B9A008;B8ZZ47	U3 small nucleolar ribonucleoprotein protein IMP4	IMP4
NaN	NaN	NaN	NaN	NaN	NaN			1	1	1	6.5	6.5	6.5	19.531	2.6235	11878000	2144500	9733700	0	NaN	0	NaN	E9PJI4;E9PPA5;E9PKQ3;J3KN87;E7EPP6;O14757-2;O14757-3;O14757	E9PJI4;E9PPA5;E9PKQ3;J3KN87;E7EPP6;O14757-2;O14757-3;O14757	Serine/threonine-protein kinase Chk1	CHEK1
NaN	NaN	NaN	NaN	NaN	NaN			2	2	2	9.1	9.1	9.1	27.907	5.7322	57660000	6797400	50863000	0	NaN	0	NaN	E7EPT4;P19404	E7EPT4;P19404	NADH dehydrogenase [ubiquinone] flavoprotein 2, mitochondrial	NDUFV2
NaN	NaN	NaN	NaN	NaN	NaN			2	2	2	4.8	4.8	4.8	88.986	17.718	47556000	11883000	35673000	0	NaN	0	NaN	E7ER68;Q658Y4	E7ER68;Q658Y4	Protein FAM91A1	FAM91A1
NaN	NaN	NaN	NaN	NaN	NaN			1	1	1	1.8	1.8	1.8	106.86	3.318	12003000	2144500	9858100	0	NaN	0	NaN	E7ERY9;Q16720-8;P23634-5;Q16720-7;P23634-4;Q16720-6;P23634-3;Q16720-3;Q16720-5;P23634-2;P20020-5;Q16720-2;P20020-2;P20020-6;P23634-7;P23634-6;Q16720-4;Q16720;P20020-3;P23634-8;P23634;P20020-4;P20020	E7ERY9;Q16720-8;P23634-5;Q16720-7;P23634-4;Q16720-6;P23634-3;Q16720-3;Q16720-5;P23634-2;P20020-5;Q16720-2;P20020-2;P20020-6;P23634-7;P23634-6;Q16720-4;Q16720;P20020-3;P23634-8;P23634;P20020-4;P20020	Calcium-transporting ATPase;Plasma membrane calcium-transporting ATPase 3;Plasma membrane calcium-transporting ATPase 4;Plasma membrane calcium-transporting ATPase 1	ATP2B1;ATP2B3;ATP2B4
NaN	NaN	NaN	NaN	NaN	NaN			1	1	1	30.5	30.5	30.5	6.382	6.6716	25962000	16678000	9283400	0	NaN	0	NaN	E9PRI2;E7ESM3;Q7L2H7	E9PRI2;E7ESM3;Q7L2H7	Eukaryotic translation initiation factor 3 subunit M	EIF3M
NaN	NaN	NaN	NaN	NaN	NaN			50	1	1	39.8	0.6	0.6	158.64	2.539	331990000	174250000	157740000	0	NaN	0	NaN	E7EX73;E9PGM1;E7EUU4;Q04637-8;Q04637-7;A0A0A0MR52;C9K073;C9J2Z7	E7EX73;E9PGM1;E7EUU4;Q04637-8;Q04637-7;A0A0A0MR52	Eukaryotic translation initiation factor 4 gamma 1	EIF4G1
NaN	NaN	NaN	NaN	NaN	NaN			1	1	1	3.3	3.3	3.3	53.067	3.7546	44612000	786610	43826000	0	NaN	0	NaN	E7EVQ6;Q14534	E7EVQ6;Q14534	Squalene monooxygenase	SQLE
NaN	NaN	NaN	-0.305967	NaN	-0.314338		+	4	4	4	15.8	15.8	15.8	54.766	38.225	184460000	122440000	62016000	0	NaN	2.18733	-0.410152	E7EVX8;Q8WWY3;Q8WWY3-4;E7EU94;E7ESX0;E7EN72;Q8WWY3-2;Q8WWY3-3	E7EVX8;Q8WWY3;Q8WWY3-4;E7EU94;E7ESX0;E7EN72;Q8WWY3-2	U4/U6 small nuclear ribonucleoprotein Prp31	PRPF31
NaN	NaN	NaN	NaN	NaN	NaN			1	1	1	21.1	21.1	21.1	7.813	8.7023	43802000	26540000	17262000	0	NaN	0	NaN	F8W1N5;F8VZJ2;F8VNW4;F8W0W4;H0YHX9;Q13765;E9PAV3-2;E9PAV3	F8W1N5;F8VZJ2;F8VNW4;F8W0W4;H0YHX9;Q13765;E9PAV3-2;E9PAV3	Nascent polypeptide-associated complex subunit alpha;Nascent polypeptide-associated complex subunit alpha, muscle-specific form	NACA
NaN	NaN	NaN	NaN	NaN	NaN			7	1	1	14.4	3.8	3.8	46.938	3.634	55822000	0	55822000	0	NaN	0	NaN	E9PC52;Q16576;Q16576-2;Q5JP01	E9PC52;Q16576;Q16576-2	Histone-binding protein RBBP7	RBBP7
NaN	NaN	NaN	NaN	NaN	NaN			164	1	1	35.3	0.2	0.2	633.66	4.0985	151020000	51404000	99620000	0	NaN	0	NaN	F6QMI7;E9PEB9;E9PHM6;E7ERU0;Q03001-8;E7ETB9;A0A0U1RQJ2;Q6P0N6;Q03001-3;Q03001-13;Q5T0V7;H0YC82;Q03001-10;H0YAT7;H0YBX0;E7ESK0;E7ERX3;A0A0J9YX05;REV__Q9BX97;Q03001-12;Q03001-11	F6QMI7;E9PEB9;E9PHM6;E7ERU0;Q03001-8	Dystonin	DST
NaN	NaN	NaN	NaN	NaN	NaN			1	1	1	1.3	1.3	1.3	111.01	5.4732	84068000	45550000	38518000	0	NaN	0	NaN	E9PEI0;Q69YH5	E9PEI0;Q69YH5	Cell division cycle-associated protein 2	CDCA2
NaN	NaN	NaN	NaN	NaN	NaN			1	1	1	11.9	11.9	11.9	21.01	31.134	97557000	97557000	0	0	NaN	0	NaN	H7C1D4;E9PGT1;Q15631	H7C1D4;E9PGT1;Q15631	Translin	TSN
NaN	NaN	NaN	NaN	NaN	NaN			2	2	2	17.3	17.3	17.3	22.042	23.345	229790000	60952000	168840000	0	NaN	0	NaN	E9PHS0;O43813	E9PHS0;O43813	LanC-like protein 1	LANCL1
NaN	NaN	NaN	NaN	NaN	NaN			2	2	2	13.1	13.1	13.1	22.712	5.1291	29778000	6101700	23677000	0	NaN	0	NaN	E9PKA7;E9PI08;Q9Y256	E9PKA7;E9PI08;Q9Y256	CAAX prenyl protease 2	RCE1
NaN	NaN	NaN	NaN	NaN	NaN			3	3	3	3.5	3.5	3.5	96.454	4.5427	51102000	29871000	21231000	0	NaN	0	NaN	E9PIF2;Q13206	E9PIF2;Q13206	Probable ATP-dependent RNA helicase DDX10	DDX10
NaN	NaN	NaN	NaN	NaN	2.37712			1	1	1	8.6	8.6	8.6	20.687	16.267	22287000	3642600	18645000	0	NaN	0	2.27712	E9PJ95;Q9P000-2;Q9P000	E9PJ95;Q9P000-2;Q9P000	COMM domain-containing protein 9	COMMD9
NaN	NaN	NaN	NaN	NaN	NaN			2	2	2	11	11	11	24.262	3.3984	46907000	2008200	44899000	0	NaN	0	NaN	E9PJC4;E9PQY7;E9PS99;E9PL78;E9PJM1;E9PMQ9;E9PSI1;O15321-2;O15321	E9PJC4;E9PQY7;E9PS99;E9PL78;E9PJM1;E9PMQ9;E9PSI1;O15321-2;O15321	Transmembrane 9 superfamily member 1	TM9SF1
NaN	NaN	NaN	NaN	NaN	NaN			1	1	1	15	15	15	18.259	36.67	76941000	76941000	0	0	NaN	0	NaN	E9PMI6;E9PJF4;J3KN38;P54105	E9PMI6;E9PJF4;J3KN38;P54105	Methylosome subunit pICln	CLNS1A
NaN	NaN	NaN	NaN	NaN	NaN			1	1	1	7.7	7.7	7.7	19.052	3.746	8435800	0	8435800	0	NaN	0	NaN	H0YDG0;E9PLK3;P55786-2;P55786	H0YDG0;E9PLK3;P55786-2;P55786	Puromycin-sensitive aminopeptidase	NPEPPS
NaN	NaN	NaN	NaN	NaN	NaN			1	1	1	10.6	10.6	10.6	18.696	3.2741	6868700	5771800	1096900	0	NaN	0	NaN	E9PNF3;E9PLW6;Q9NRN7	E9PNF3;E9PLW6;Q9NRN7	L-aminoadipate-semialdehyde dehydrogenase-phosphopantetheinyl transferase	AASDHPPT
NaN	NaN	NaN	NaN	NaN	NaN			1	1	1	13.9	13.9	13.9	19.847	2.6136	4755100	915920	3839100	0	NaN	0	NaN	E9PMD4;Q08945	E9PMD4;Q08945	FACT complex subunit SSRP1	SSRP1
NaN	NaN	NaN	NaN	NaN	NaN			1	1	1	12.2	12.2	12.2	12.976	2.5807	11909000	1058100	10851000	0	NaN	0	NaN	E9PP55;Q96K19-5;Q96K19-3;Q96K19-2;Q96K19	E9PP55;Q96K19-5;Q96K19-3;Q96K19-2;Q96K19	E3 ubiquitin-protein ligase RNF170	RNF170
NaN	NaN	NaN	NaN	NaN	NaN			1	1	1	11.7	11.7	11.7	16.423	3.6352	27090000	14454000	12636000	0	NaN	0	NaN	F2Z2A4;H0Y501;H7C1M5;Q9H147	F2Z2A4;H0Y501;H7C1M5;Q9H147	Deoxynucleotidyltransferase terminal-interacting protein 1	DNTTIP1
NaN	NaN	NaN	NaN	NaN	NaN			2	2	2	3.3	3.3	3.3	82.603	2.8145	8341100	1238900	7102200	0	NaN	0	NaN	F2Z2B9;Q9BSJ2;Q9BSJ2-4;Q9BSJ2-3	F2Z2B9;Q9BSJ2;Q9BSJ2-4;Q9BSJ2-3	Gamma-tubulin complex component 2	TUBGCP2
NaN	NaN	NaN	NaN	-0.0688616	NaN			3	3	3	1	1	1	405.8	4.6385	32293000	19577000	12716000	0	NaN	0	-0.168862	H0Y4W2;F2Z2U4;Q9Y4A5-2;Q9Y4A5	H0Y4W2;F2Z2U4;Q9Y4A5-2;Q9Y4A5	Transformation/transcription domain-associated protein	TRRAP
NaN	NaN	NaN	NaN	NaN	NaN			2	2	2	29.9	29.9	29.9	7.3713	4.7206	21550000	7932100	13618000	0	NaN	0	NaN	F2Z2Y6;O95777;C9JNV3	F2Z2Y6;O95777;C9JNV3	U6 snRNA-associated Sm-like protein LSm8	LSM8
NaN	NaN	NaN	NaN	NaN	NaN			1	1	1	12.5	12.5	12.5	8.2207	2.4973	13029000	0	13029000	0	NaN	0	NaN	F2Z3J2;Q16401-2;Q16401	F2Z3J2;Q16401-2;Q16401	26S proteasome non-ATPase regulatory subunit 5	PSMD5
NaN	NaN	NaN	NaN	NaN	NaN			1	1	1	38.7	38.7	38.7	6.9099	15.373	27760000	26860000	900150	0	NaN	0	NaN	H0YG71;F5GWX2;Q9NRV9	H0YG71;F5GWX2;Q9NRV9	Heme-binding protein 1	HEBP1
NaN	NaN	NaN	NaN	NaN	NaN			1	1	1	10.7	10.7	10.7	18.592	2.6836	13292000	13292000	0	0	NaN	0	NaN	H3BU66;H3BPM5;H3BQX0;H3BNY8;H3BMZ9;H3BPP3;H3BP57;H3BT48;H3BUZ9;F5GX71;H3BPB8;P34949	H3BU66;H3BPM5;H3BQX0;H3BNY8;H3BMZ9;H3BPP3;H3BP57;H3BT48;H3BUZ9;F5GX71;H3BPB8;P34949	Mannose-6-phosphate isomerase	MPI
NaN	NaN	NaN	NaN	NaN	NaN			3	3	3	16.8	16.8	16.8	20.879	2.1865	36041000	28987000	7053900	0	NaN	0	NaN	F5H6J5;F5GX80;Q6NZY4-2;Q6NZY4	F5H6J5;F5GX80;Q6NZY4-2;Q6NZY4	Zinc finger CCHC domain-containing protein 8	ZCCHC8
NaN	NaN	NaN	NaN	NaN	NaN			2	2	2	14.4	14.4	14.4	16.776	2.6144	7004700	3057300	3947400	0	NaN	0	NaN	F5GY32;F5H1S9;G8JLB3;Q9Y606-2;Q9Y606;F5H168;F8W9U5;F5H1B2;F5GXL3	F5GY32;F5H1S9;G8JLB3;Q9Y606-2;Q9Y606;F5H168;F8W9U5;F5H1B2;F5GXL3	tRNA pseudouridine synthase;tRNA pseudouridine synthase A, mitochondrial	PUS1
NaN	NaN	NaN	NaN	NaN	NaN			1	1	1	10.7	10.7	10.7	20.892	6.6137	9928700	9928700	0	0	NaN	0	NaN	F5GY90;F5H226;F5H345;P08397-4;P08397-3;P08397-2;P08397	F5GY90;F5H226;F5H345;P08397-4;P08397-3;P08397-2;P08397	Porphobilinogen deaminase	HMBS
NaN	NaN	NaN	NaN	NaN	NaN			2	2	2	11	11	11	16.729	2.2412	24773000	792860	23981000	0	NaN	0	NaN	F5H1S8;Q14165;H0YG07	F5H1S8;Q14165;H0YG07	Malectin	MLEC
NaN	NaN	NaN	NaN	NaN	NaN			1	1	1	1.9	1.9	1.9	107.3	5.5703	17185000	7875100	9310100	0	NaN	0	NaN	F5H3Y4;Q8IY37	F5H3Y4;Q8IY37	Probable ATP-dependent RNA helicase DHX37	DHX37
NaN	NaN	NaN	NaN	NaN	NaN			2	2	2	1.9	1.9	1.9	161.15	4.2303	15546000	0	15546000	0	NaN	0	NaN	F5H527;Q76I76	F5H527;Q76I76	Protein phosphatase Slingshot homolog 2	SSH2
NaN	NaN	NaN	NaN	NaN	NaN			1	1	1	12.3	12.3	12.3	17.83	9.8277	11788000	11788000	0	0	NaN	0	NaN	H7C2N3;F5H578;O75400-2;O75400	H7C2N3;F5H578;O75400-2;O75400	Pre-mRNA-processing factor 40 homolog A	PRPF40A
NaN	NaN	NaN	NaN	NaN	NaN			1	1	1	3	3	3	65.19	8.8593	0	0	0	0	NaN	0	NaN	F5H5U2;Q8NHQ9	F5H5U2;Q8NHQ9	ATP-dependent RNA helicase DDX55	DDX55
NaN	NaN	NaN	NaN	NaN	NaN			1	1	1	9	9	9	18.251	6.8314	34555000	17418000	17138000	0	NaN	0	NaN	F5H6B6;F5H8A0;Q86TN4-2;Q86TN4-3;Q86TN4;Q86TN4-4	F5H6B6;F5H8A0;Q86TN4-2;Q86TN4-3;Q86TN4;Q86TN4-4	tRNA 2-phosphotransferase 1	TRPT1
NaN	NaN	NaN	NaN	NaN	NaN			3	3	3	35.1	35.1	35.1	8.2139	13.636	51731000	2545700	49186000	0	NaN	0	NaN	G3V1U5;F5H6U7;Q9Y3E0	G3V1U5;F5H6U7;Q9Y3E0	Vesicle transport protein GOT1B	GOLT1B
NaN	NaN	NaN	NaN	NaN	1.89983			3	3	3	22.7	22.7	22.7	19.686	11.066	238640000	83934000	154710000	0	NaN	0	1.79983	F6QUN3;H0Y4B0;O43414-3;O43414-2;O43414;F6UGJ8	F6QUN3;H0Y4B0;O43414-3;O43414-2;O43414;F6UGJ8	ERI1 exoribonuclease 3	ERI3
NaN	NaN	NaN	-3.26382	NaN	NaN			2	2	2	20.3	20.3	20.3	25.5	36.961	138070000	134350000	3714400	0	NaN	0	-3.36382	I3L3Q4;F6TLX2;Q9HC38-3;Q9HC38-2;Q9HC38	I3L3Q4;F6TLX2;Q9HC38-3;Q9HC38-2;Q9HC38	Glyoxalase domain-containing protein 4	GLOD4
NaN	NaN	NaN	NaN	NaN	NaN			2	2	2	23.9	23.9	23.9	12.27	8.1053	92351000	8880900	83470000	0	NaN	0	NaN	F6WST4;Q9P0S3;Q53FV1;J3KTF9;F8VXD5;J3QRM9;Q8N138-4;Q8N138	F6WST4;Q9P0S3;Q53FV1;J3KTF9;F8VXD5;J3QRM9;Q8N138-4;Q8N138	ORM1-like protein 1;ORM1-like protein 2;ORM1-like protein 3	ORMDL1;ORMDL2;ORMDL3
NaN	NaN	NaN	NaN	0.939828	0.925392		+	3	3	3	15.6	15.6	15.6	26.736	9.2268	207740000	63424000	144310000	0	NaN	2.25814	0.83261	F8VW96;Q16527;F8VQR7	F8VW96;Q16527;F8VQR7	Cysteine and glycine-rich protein 2	CSRP2
NaN	NaN	NaN	NaN	NaN	NaN			2	2	2	8.1	8.1	8.1	45.314	3.7035	180910000	101010000	79892000	0	NaN	0	NaN	F8VWW8;Q92485;Q5T0Y8;Q92485-2	F8VWW8;Q92485;Q5T0Y8;Q92485-2	Acid sphingomyelinase-like phosphodiesterase 3b	SMPDL3B
NaN	NaN	NaN	NaN	NaN	NaN			2	2	2	17.5	17.5	17.5	21.778	8.5399	52333000	29347000	22986000	0	NaN	0	NaN	F8VYN9;P40616-2;P40616;F8VP99;F8VP63	F8VYN9;P40616-2;P40616;F8VP99;F8VP63	ADP-ribosylation factor-like protein 1	ARL1
NaN	NaN	NaN	1.23493	NaN	NaN			4	4	4	10.4	10.4	10.4	45.634	5.0635	182160000	71949000	110210000	0	NaN	0	1.13493	F8VZ44;Q9NRG9;Q9NRG9-2;H3BU82	F8VZ44;Q9NRG9;Q9NRG9-2;H3BU82	Aladin	AAAS
NaN	NaN	NaN	NaN	NaN	NaN			3	3	3	19.1	19.1	19.1	17.499	30.828	176770000	176770000	0	0	NaN	0	NaN	F8VZG5;F8W1A4;P54819-4;P54819-6;P54819-3;P54819-2;P54819;F8VY04;G3V213;P54819-5	F8VZG5;F8W1A4;P54819-4;P54819-6;P54819-3;P54819-2;P54819;F8VY04	Adenylate kinase 2, mitochondrial;Adenylate kinase 2, mitochondrial;Adenylate kinase 2, mitochondrial, N-terminally processed	AK2
NaN	NaN	NaN	NaN	NaN	NaN			13	1	1	62	11	11	18.565	8.4891	37037000	16215000	20822000	0	NaN	0	NaN	F8W7C6	F8W7C6		RPL10
NaN	NaN	NaN	NaN	NaN	NaN			2	2	2	13.7	13.7	13.7	22.2	2.9731	14036000	6591100	7444500	0	NaN	0	NaN	H0YFD2;F8WFC1;Q8N9T8	H0YFD2;F8WFC1;Q8N9T8	Protein KRI1 homolog	KRI1
NaN	NaN	NaN	NaN	NaN	NaN			2	2	2	8.2	8.2	8.2	54.191	9.0543	38862000	5040000	33822000	0	NaN	0	NaN	G3V0E4;O75439	G3V0E4;O75439	Mitochondrial-processing peptidase subunit beta	PMPCB
NaN	NaN	NaN	NaN	NaN	NaN			3	3	3	2.7	2.7	2.7	148.86	3.882	8867000	2082100	6784800	0	NaN	0	NaN	G3V198;Q12769;E9PR16	G3V198;Q12769;E9PR16	Nuclear pore complex protein Nup160	NUP160
NaN	NaN	NaN	NaN	NaN	NaN			1	1	1	4.4	4.4	4.4	22.965	3.2522	32588000	13645000	18942000	0	NaN	0	NaN	G3V1D7;Q86UN3-2;Q86UN3	G3V1D7;Q86UN3-2;Q86UN3	Reticulon-4 receptor-like 2	RTN4RL2
NaN	NaN	NaN	NaN	NaN	NaN			13	1	1	55	13.4	13.4	25.256	11.01	29986000	20547000	9439100	0	NaN	0	NaN	G3V576;G3V2Q1;P07910;G3V555;G3V575	G3V576;G3V2Q1;P07910;G3V555;G3V575	Heterogeneous nuclear ribonucleoproteins C1/C2	HNRNPC
NaN	NaN	NaN	NaN	NaN	NaN			1	1	1	43.2	43.2	43.2	4.1437	5.3597	22056000	22056000	0	0	NaN	0	NaN	G3V3F8;G3V597;P07311-2;P07311	G3V3F8;G3V597;P07311-2;P07311	Acylphosphatase-1	ACYP1
NaN	NaN	NaN	NaN	NaN	NaN			3	3	3	32	32	32	17.512	20.519	66954000	43610000	23344000	0	NaN	0	NaN	G3V4P8;P60983;G3V3X4;M0QYG8;M0R1D2;M0R0C1;M0QYJ8;O60234	G3V4P8;P60983	Glia maturation factor beta	GMFB
NaN	NaN	NaN	NaN	NaN	NaN			1	1	1	1.5	1.5	1.5	83.924	3.9527	40740000	19672000	21068000	0	NaN	0	NaN	G3V533;Q6ZMZ3-2;Q6ZMZ3	G3V533;Q6ZMZ3-2;Q6ZMZ3	Nesprin-3	SYNE3
NaN	NaN	NaN	NaN	NaN	NaN			2	2	2	10.9	10.9	10.9	19.98	4.5098	62872000	0	62872000	0	NaN	0	NaN	G3XA94;Q9NPL8	G3XA94;Q9NPL8	Complex I assembly factor TIMMDC1, mitochondrial	TIMMDC1
NaN	NaN	NaN	NaN	NaN	NaN			1	1	1	10.6	10.6	10.6	28.858	10.178	9766900	6491500	3275400	0	NaN	0	NaN	G5E9R9;P10155-3;P10155-5;P10155-4;P10155	G5E9R9;P10155-3;P10155-5;P10155-4;P10155	60 kDa SS-A/Ro ribonucleoprotein	TROVE2
NaN	NaN	NaN	NaN	NaN	NaN			1	1	1	4.3	4.3	4.3	43.28	6.8078	14617000	1086300	13531000	0	NaN	0	NaN	G5E9Z2;Q96KA5-2;Q96KA5	G5E9Z2;Q96KA5-2;Q96KA5	Cleft lip and palate transmembrane protein 1-like protein	CLPTM1L
NaN	NaN	NaN	-0.533326	NaN	-0.758233			2	2	2	4.1	4.1	4.1	55.142	3.272	220140000	143020000	77119000	0	NaN	1.02102	-0.745779	G5EA30;Q92879-5;Q92879-2;Q92879-3;Q92879-6;Q92879;Q92879-4;E9PKA1;F5H4Y5;E9PQK4;E9PSH0;F5H0D8;E9PKU1	G5EA30;Q92879-5;Q92879-2;Q92879-3;Q92879-6;Q92879;Q92879-4;E9PKA1;F5H4Y5;E9PQK4;E9PSH0;F5H0D8;E9PKU1	CUGBP Elav-like family member 1	CELF1
NaN	NaN	NaN	NaN	NaN	NaN			2	2	2	3.9	3.9	3.9	79.621	2.7812	17900000	1794500	16105000	0	NaN	0	NaN	G8JLD5;O00429-4;O00429-5;O00429-3;O00429-2;O00429;O00429-8;O00429-6;B4DPZ9;F8W1W3;F8VUJ9;F8VZ52	G8JLD5;O00429-4;O00429-5;O00429-3;O00429-2;O00429;O00429-8;O00429-6;B4DPZ9;F8W1W3;F8VUJ9;F8VZ52	Dynamin-1-like protein	DNM1L
NaN	NaN	NaN	NaN	NaN	NaN			3	3	3	11.7	11.7	11.7	29.098	4.3518	9724000	917090	8806900	0	NaN	0	NaN	G8JLK1;Q9NZ43;M0QZE0;Q9NZ43-3;Q9NZ43-2;M0QZZ6;M0QYT5	G8JLK1;Q9NZ43;M0QZE0;Q9NZ43-3;Q9NZ43-2	Vesicle transport protein USE1	USE1
NaN	NaN	NaN	-0.0698607	NaN	NaN			2	2	2	2.1	2.1	2.1	129.37	6.4569	75169000	45392000	29777000	0	NaN	0	-0.169861	H0Y488;O14497-3;O14497;H0YEW5;A0A087WUV6;O14497-2	H0Y488;O14497-3;O14497;H0YEW5;A0A087WUV6;O14497-2	AT-rich interactive domain-containing protein 1A	ARID1A
NaN	NaN	NaN	-1.27953	NaN	NaN			2	2	2	15.6	15.6	15.6	15.397	8.5071	19580000	16897000	2683300	0	NaN	0	-1.37953	H0Y4J6;Q5T9B7;P00568	H0Y4J6;Q5T9B7;P00568	Adenylate kinase isoenzyme 1	AK1
NaN	NaN	NaN	NaN	NaN	NaN			1	1	1	2.7	2.7	2.7	59.729	2.7157	9362400	0	9362400	0	NaN	0	NaN	H0Y4R5;Q5SNT2-2;Q5SNT2	H0Y4R5;Q5SNT2-2;Q5SNT2	Transmembrane protein 201	TMEM201
NaN	NaN	NaN	NaN	NaN	NaN			1	1	1	6.9	6.9	6.9	31.143	3.4718	182610000	109490000	73112000	0	NaN	0	NaN	X6RDH7;H0Y4Y8;Q8N539	X6RDH7;H0Y4Y8;Q8N539	Fibrinogen C domain-containing protein 1	FIBCD1
NaN	NaN	NaN	NaN	NaN	NaN			1	1	1	1.1	1.1	1.1	174.84	2.4404	15593000	0	15593000	0	NaN	0	NaN	H0Y6Z7;P10586-2;P10586	H0Y6Z7;P10586-2;P10586	Receptor-type tyrosine-protein phosphatase F	PTPRF
NaN	NaN	NaN	NaN	NaN	1.5099			2	2	2	7.2	7.2	7.2	30.987	3.703	196260000	78874000	117390000	0	NaN	0	1.4099	H0Y711;Q9BQA1;Q9BQA1-2	H0Y711;Q9BQA1;Q9BQA1-2	Methylosome protein 50	WDR77
NaN	NaN	NaN	NaN	NaN	NaN			1	1	1	7	7	7	25.868	3.2328	4824200	4824200	0	0	NaN	0	NaN	H0Y8X4;O43598	H0Y8X4;O43598	2-deoxynucleoside 5-phosphate N-hydrolase 1	DNPH1
NaN	NaN	NaN	NaN	NaN	NaN			1	1	1	1.4	1.4	1.4	104.69	3.3323	18702000	6146300	12555000	0	NaN	0	NaN	H0Y8X6;P46934-4;P46934-3;P46934-2;P46934	H0Y8X6;P46934-4;P46934-3;P46934-2;P46934	E3 ubiquitin-protein ligase NEDD4	NEDD4
NaN	NaN	NaN	NaN	NaN	NaN			2	2	2	17.9	17.9	17.9	22.279	7.9331	213230000	109100000	104130000	0	NaN	0	NaN	H0YAR1;Q9Y4K0	H0YAR1;Q9Y4K0	Lysyl oxidase homolog 2	LOXL2
NaN	NaN	NaN	NaN	NaN	NaN			1	1	1	15	15	15	13.715	19.74	113950000	113950000	0	0	NaN	0	NaN	H0YBX3;H0YB34;P52758	H0YBX3;H0YB34;P52758	Ribonuclease UK114	HRSP12
NaN	NaN	NaN	NaN	NaN	NaN			2	2	2	2	2	2	134.71	3.668	90133000	62921000	27213000	0	NaN	0	NaN	H0YD14;Q9NZM1-2;Q9NZM1-6;Q9NZM1-3;Q9NZM1;Q9NZM1-5	H0YD14;Q9NZM1-2;Q9NZM1-6;Q9NZM1-3;Q9NZM1;Q9NZM1-5	Myoferlin	MYOF
NaN	NaN	NaN	NaN	NaN	NaN			1	1	1	11.5	11.5	11.5	13.271	7.5524	17505000	0	17505000	0	NaN	0	NaN	H0YGT2;P20645	H0YGT2;P20645	Cation-dependent mannose-6-phosphate receptor	M6PR
NaN	NaN	NaN	NaN	NaN	NaN			1	1	1	6	6	6	29.326	3.3917	39875000	22277000	17597000	0	NaN	0	NaN	H0YI98;Q13561;Q13561-3;Q13561-2	H0YI98;Q13561;Q13561-3;Q13561-2	Dynactin subunit 2	DCTN2
NaN	NaN	NaN	NaN	NaN	NaN			1	1	1	8	8	8	36.665	2.5394	19423000	0	19423000	0	NaN	0	NaN	H0YJH0;Q9H4B6	H0YJH0;Q9H4B6	Protein salvador homolog 1	SAV1
NaN	NaN	NaN	NaN	NaN	NaN			2	2	2	13.1	13.1	13.1	24.16	3.3215	11309000	8267800	3041400	0	NaN	0	NaN	H0YK49;H0YL12;H0YNX6;P13804-2;P13804;H0YKF0;H0YLU7	H0YK49;H0YL12;H0YNX6;P13804-2;P13804;H0YKF0;H0YLU7	Electron transfer flavoprotein subunit alpha, mitochondrial	ETFA
NaN	NaN	NaN	NaN	-0.0954041	NaN			6	6	6	3.3	3.3	3.3	263.25	11.586	80570000	36836000	43735000	0	NaN	0	-0.195404	H0YM23;O75179-6;O75179-7;O75179-2;O75179;E9PDP5;O75179-3;Q8IWZ3;Q8IWZ3-4;Q8IWZ3-6;H0YLQ3;Q8IWZ3-5;Q8IWZ3-2;O75179-5;O75179-4;D6RHC4;H7C2F5;H3BLS9;Q8IWZ3-3	H0YM23;O75179-6;O75179-7;O75179-2;O75179;E9PDP5;O75179-3;Q8IWZ3;Q8IWZ3-4;Q8IWZ3-6;H0YLQ3;Q8IWZ3-5;Q8IWZ3-2;O75179-5;O75179-4	Ankyrin repeat domain-containing protein 17;Ankyrin repeat and KH domain-containing protein 1	ANKRD17;ANKHD1
NaN	NaN	NaN	NaN	NaN	NaN			3	3	3	3.5	3.5	3.5	104.75	4.0011	132510000	70697000	61816000	0	NaN	0	NaN	H0YMD1;H0YM92;J3KMZ9;P01130-2;P01130-3;P01130-6;P01130-4;P01130-5;P01130	H0YMD1;H0YM92;J3KMZ9;P01130-2;P01130-3;P01130-6;P01130-4;P01130-5;P01130	Low-density lipoprotein receptor	LDLR
NaN	NaN	NaN	NaN	NaN	NaN			1	1	1	43	43	43	9.1874	24.132	22293000	22293000	0	0	NaN	0	NaN	H7BZ09;H0YN26;P39687	H7BZ09;H0YN26;P39687	Acidic leucine-rich nuclear phosphoprotein 32 family member A	ANP32A
NaN	NaN	NaN	NaN	NaN	NaN			2	2	2	16	16	16	11.986	2.5829	6916300	973680	5942600	0	NaN	0	NaN	H0YNX5;H0YNA5;H0YNG3;P67812-2;P67812-4;P67812;P67812-3	H0YNX5;H0YNA5;H0YNG3;P67812-2;P67812-4;P67812;P67812-3	Signal peptidase complex catalytic subunit SEC11;Signal peptidase I;Signal peptidase complex catalytic subunit SEC11A	SEC11A
NaN	NaN	NaN	NaN	NaN	NaN			2	2	2	14.2	14.2	14.2	17.668	3.547	56842000	23793000	33050000	0	NaN	0	NaN	H3BMH2;H3BSC1;P62491-2;Q15907-2;P62491;Q15907	H3BMH2;H3BSC1;P62491-2;Q15907-2;P62491;Q15907	Ras-related protein Rab-11A;Ras-related protein Rab-11B	RAB11A;RAB11B
NaN	NaN	NaN	NaN	NaN	NaN			1	1	1	11.7	11.7	11.7	15.108	4.1893	81998000	22347000	59652000	0	NaN	0	NaN	H3BPG5;H3BV80;H3BMS0;H3BMM9;H3BTC0;Q15287-3;Q15287-2;Q15287	H3BPG5;H3BV80;H3BMS0;H3BMM9;H3BTC0;Q15287-3;Q15287-2;Q15287	RNA-binding protein with serine-rich domain 1	RNPS1
NaN	NaN	NaN	NaN	NaN	NaN			2	2	2	7.9	7.9	7.9	15.522	2.5735	165950000	29996000	135960000	0	NaN	0	NaN	H3BMW4;Q9BTX3-2;Q9BTX3	H3BMW4;Q9BTX3-2;Q9BTX3	Transmembrane protein 208	TMEM208
NaN	NaN	NaN	NaN	NaN	NaN			1	1	1	15.7	15.7	15.7	8.1425	2.8773	17630000	2200400	15429000	0	NaN	0	NaN	H3BNH5;H3BQI7;H3BT52;Q3SXM5-2;Q3SXM5	H3BNH5;H3BQI7;H3BT52;Q3SXM5-2;Q3SXM5	Inactive hydroxysteroid dehydrogenase-like protein 1	HSDL1
NaN	NaN	NaN	NaN	NaN	NaN			3	3	3	29.4	29.4	29.4	20.064	13.912	38352000	9581100	28771000	0	NaN	0	NaN	H3BNT7;H3BTM8;P51665;H3BQV2	H3BNT7;H3BTM8;P51665	26S proteasome non-ATPase regulatory subunit 7	PSMD7
NaN	NaN	NaN	NaN	NaN	NaN			1	1	1	9.8	9.8	9.8	14.619	2.9543	20957000	8316500	12640000	0	NaN	0	NaN	H3BPL5;Q96ES7	H3BPL5;Q96ES7	SAGA-associated factor 29 homolog	CCDC101
NaN	NaN	NaN	NaN	NaN	NaN			1	1	1	21.9	21.9	21.9	17.272	17.936	78565000	78565000	0	0	NaN	0	NaN	H3BQW8;H3BPQ4;Q16775-2	H3BQW8;H3BPQ4;Q16775-2		HAGH
NaN	NaN	NaN	1.71458	NaN	NaN			3	3	3	17.7	17.7	17.7	39.34	10.506	221700000	85137000	136560000	0	NaN	0	1.61458	H3BQN4;J3KPS3;P04075;P04075-2;H3BR04;H3BPS8;H3BR68;H3BMQ8;H3BUH7;H3BU78	H3BQN4;J3KPS3;P04075;P04075-2;H3BR04;H3BPS8	Fructose-bisphosphate aldolase;Fructose-bisphosphate aldolase A	ALDOA
NaN	NaN	NaN	NaN	NaN	NaN			2	2	2	21.6	21.6	21.6	23.717	2.6335	33916000	20138000	13778000	0	NaN	0	NaN	H3BRL9;P78549-3;P78549-2;P78549;H3BPD5	H3BRL9;P78549-3;P78549-2;P78549;H3BPD5	Endonuclease III-like protein 1	NTHL1
NaN	NaN	NaN	NaN	NaN	NaN			1	1	1	3	3	3	56.825	6.3091	19692000	6179400	13513000	0	NaN	0	NaN	H3BTB7;Q5JPH6;Q5JPH6-2	H3BTB7;Q5JPH6;Q5JPH6-2	Probable glutamate--tRNA ligase, mitochondrial	EARS2
NaN	NaN	NaN	NaN	NaN	NaN			3	3	3	44.3	44.3	44.3	15.716	16.076	182690000	5422600	177260000	0	NaN	0	NaN	H3BUX2;J3KNF8;O43169;D6RFH4;J3QR91	H3BUX2;J3KNF8;O43169;D6RFH4	Cytochrome b5 type B	CYB5B
NaN	NaN	NaN	NaN	NaN	NaN			5	2	2	43.9	18.4	18.4	11.658	7.5016	396960000	0	396960000	0	NaN	0	NaN	H6UMI1;O95166;I3L3J4	H6UMI1;O95166	Gamma-aminobutyric acid receptor-associated protein	GABARAP
NaN	NaN	NaN	NaN	NaN	NaN			2	2	2	3.1	3.1	3.1	91.403	3.3921	137160000	109890000	27273000	0	NaN	0	NaN	H7BYG8;O94822;O94822-3	H7BYG8;O94822;O94822-3	E3 ubiquitin-protein ligase listerin	LTN1
NaN	NaN	NaN	NaN	NaN	NaN			1	1	1	21.9	21.9	21.9	7.3242	3.2459	100790000	27611000	73175000	0	NaN	0	NaN	J3KRM8;H7BYT1;P48730-2;P48730	J3KRM8;H7BYT1;P48730-2;P48730	Casein kinase I isoform delta	CSNK1D
NaN	NaN	NaN	NaN	NaN	NaN			1	1	1	5.6	5.6	5.6	35.071	7.3153	37714000	1013800	36700000	0	NaN	0	NaN	H7BZ81;H7C3J0;Q6NUM9-2;Q6NUM9	H7BZ81;H7C3J0;Q6NUM9-2;Q6NUM9	All-trans-retinol 13,14-reductase	RETSAT
NaN	NaN	NaN	NaN	NaN	NaN			2	2	2	31	31	31	6.447	3.4403	105910000	0	105910000	0	NaN	0	NaN	H7C0D5;Q9BSR8	H7C0D5;Q9BSR8	Protein YIPF4	YIPF4
NaN	NaN	NaN	NaN	NaN	NaN			2	2	2	6.8	6.8	6.8	36.898	6.0929	46063000	7767900	38295000	0	NaN	0	NaN	H7C0X4;Q92685;F8WF93;H7BZZ2;F8WE30;C9J7S5;Q92685-2	H7C0X4;Q92685;F8WF93;H7BZZ2;F8WE30;C9J7S5;Q92685-2	Dol-P-Man:Man(5)GlcNAc(2)-PP-Dol alpha-1,3-mannosyltransferase	ALG3
NaN	NaN	NaN	NaN	NaN	NaN			1	1	1	17.2	17.2	17.2	13.529	6.0102	111140000	65577000	45563000	0	NaN	0	NaN	H7C170;O43709;O43709-3	H7C170;O43709;O43709-3	Probable 18S rRNA (guanine-N(7))-methyltransferase	WBSCR22
NaN	NaN	NaN	NaN	NaN	NaN			1	1	1	8.4	8.4	8.4	22.065	2.9737	3240600	335030	2905500	0	NaN	0	NaN	H7C1E4;P61966	H7C1E4;P61966	AP-1 complex subunit sigma-1A	AP1S1
NaN	NaN	NaN	NaN	NaN	NaN			2	2	2	7.8	7.8	7.8	26.759	3.0302	27611000	6798400	20813000	0	NaN	0	NaN	H7C1G6;Q7Z3C6-2;Q7Z3C6	H7C1G6;Q7Z3C6-2;Q7Z3C6	Autophagy-related protein 9A	ATG9A
NaN	NaN	NaN	NaN	NaN	NaN			1	1	1	5.7	5.7	5.7	23.718	3.8723	27298000	11829000	15468000	0	NaN	0	NaN	H7C1X9;Q9H9A5-4;Q9H9A5-3;Q9H9A5-2;Q9H9A5;Q9H9A5-6	H7C1X9;Q9H9A5-4;Q9H9A5-3;Q9H9A5-2;Q9H9A5;Q9H9A5-6	CCR4-NOT transcription complex subunit 10	CNOT10
NaN	NaN	NaN	NaN	NaN	NaN			2	2	2	23.5	23.5	23.5	8.8138	2.8156	22792000	0	22792000	0	NaN	0	NaN	H7C3V6;O96011-2;O96011	H7C3V6;O96011-2;O96011	Peroxisomal membrane protein 11B	PEX11B
NaN	NaN	NaN	NaN	NaN	NaN			1	1	1	5.8	5.8	5.8	30.001	3.084	4681200	783590	3897600	0	NaN	0	NaN	H7C4G8;Q9H857-4;Q9H857;Q9H857-3;Q9H857-2	H7C4G8;Q9H857-4;Q9H857;Q9H857-3;Q9H857-2	5-nucleotidase domain-containing protein 2	NT5DC2
NaN	NaN	NaN	NaN	NaN	NaN			1	1	1	4.9	4.9	4.9	29.503	2.9268	24433000	17267000	7166400	0	NaN	0	NaN	H7C4M4;Q9ULI3	H7C4M4;Q9ULI3	Protein HEG homolog 1	HEG1
NaN	NaN	NaN	NaN	NaN	NaN			1	1	1	10.9	10.9	10.9	15.857	5.0428	45002000	6749100	38252000	0	NaN	0	NaN	H7C531;Q15008-3;Q15008-2;Q15008;Q15008-4	H7C531;Q15008-3;Q15008-2;Q15008;Q15008-4	26S proteasome non-ATPase regulatory subunit 6	PSMD6
NaN	NaN	NaN	NaN	NaN	NaN			2	2	2	1.6	1.6	1.6	130.08	3.0969	31206000	14601000	16605000	0	NaN	0	NaN	H7C5E4;Q8IZH2-2;Q8IZH2	H7C5E4;Q8IZH2-2;Q8IZH2	5-3 exoribonuclease 1	XRN1
NaN	NaN	NaN	NaN	NaN	NaN			2	2	2	32	32	32	8.3713	3.7203	88861000	86568000	2293000	0	NaN	0	NaN	I3L0K2;I3L3M7;Q9BRA2;I3L2R6	I3L0K2;I3L3M7;Q9BRA2;I3L2R6	Thioredoxin domain-containing protein 17	TXNDC17
NaN	NaN	NaN	NaN	NaN	-0.410543			1	1	1	6.2	6.2	6.2	33.524	4.1731	29081000	15937000	13144000	0	NaN	0	-0.510543	I3L0U5;Q6PK04	I3L0U5;Q6PK04	Coiled-coil domain-containing protein 137	CCDC137
NaN	NaN	NaN	-0.479372	NaN	NaN			1	1	1	16.9	16.9	16.9	7.032	5.7119	124240000	78294000	45949000	0	NaN	0	-0.579372	I3L172;Q9BUT9-2;Q9BUT9	I3L172;Q9BUT9-2;Q9BUT9	Protein FAM195A	FAM195A
NaN	NaN	NaN	NaN	NaN	NaN			1	1	1	25	25	25	8.6762	2.4771	0	0	0	0	NaN	0	NaN	I3L1J9;Q9NP84-2;Q9NP84	I3L1J9;Q9NP84-2;Q9NP84	Tumor necrosis factor receptor superfamily member 12A	TNFRSF12A
NaN	NaN	NaN	NaN	NaN	NaN			1	1	1	13.3	13.3	13.3	11.628	3.6794	45302000	19005000	26297000	0	NaN	0	NaN	I3L234;I3L3C4;I3L3U9;J3QSV6;O76021	I3L234;I3L3C4;I3L3U9;J3QSV6;O76021	Ribosomal L1 domain-containing protein 1	RSL1D1
NaN	NaN	NaN	NaN	NaN	NaN			2	2	2	10.6	10.6	10.6	35.698	4.7886	11583000	7532300	4051000	0	NaN	0	NaN	I3L323;Q8IWR0;I3L282;I3L2K5	I3L323;Q8IWR0;I3L282;I3L2K5	Zinc finger CCCH domain-containing protein 7A	ZC3H7A
NaN	NaN	NaN	NaN	NaN	NaN			1	1	1	11.5	11.5	11.5	12.939	2.2954	42166000	16873000	25292000	0	NaN	0	NaN	I3L3E4;I3L4G8;I3L4A1;Q96FZ7	I3L3E4;I3L4G8;I3L4A1;Q96FZ7	Charged multivesicular body protein 6	CHMP6
NaN	NaN	NaN	NaN	NaN	NaN			3	3	3	19.8	19.8	19.8	19.584	11.223	260560000	30140000	230420000	0	NaN	0	NaN	I3L443;Q9HC36	I3L443;Q9HC36	rRNA methyltransferase 3, mitochondrial	RNMTL1
NaN	NaN	NaN	NaN	NaN	NaN			1	1	1	4	4	4	45.78	9.9828	42475000	25326000	17149000	0	NaN	0	NaN	J3KMZ8;Q92785-2;Q92785	J3KMZ8;Q92785-2;Q92785	Zinc finger protein ubi-d4	DPF2
NaN	NaN	NaN	NaN	NaN	NaN			33	1	0	68.4	4.6	0	33.222	5.4369	1077700000	687350000	390390000	0	NaN	0	NaN	J3KN67;D6RGJ6	J3KN67		TPM3
NaN	NaN	NaN	NaN	NaN	NaN			2	2	2	3.9	3.9	3.9	83.359	9.503	23782000	3451800	20330000	0	NaN	0	NaN	J3KPM9;P42224-2;P42224	J3KPM9;P42224-2;P42224	Signal transducer and activator of transcription;Signal transducer and activator of transcription 1-alpha/beta	STAT1
NaN	NaN	NaN	NaN	NaN	NaN			3	3	3	8	8	8	58.22	9.9089	111950000	58671000	53283000	0	NaN	0	NaN	J3KPP4;O95232;D6RDI2;D6RHH0;U3KQT3;E7EN55;C9JL41;O95232-2	J3KPP4;O95232;D6RDI2	Luc7-like protein 3	LUC7L3
NaN	NaN	NaN	NaN	3.40613	NaN			4	4	4	9.8	9.8	9.8	48.915	12.766	277400000	31673000	245720000	0	NaN	0	3.30613	J3KQL8;Q9BQE5;E9PM95	J3KQL8;Q9BQE5	Apolipoprotein L2	APOL2
NaN	NaN	NaN	NaN	NaN	NaN			1	1	1	14.9	14.9	14.9	7.3103	2.2853	29626000	3142500	26484000	0	NaN	0	NaN	J3KSB1;J3KSI7;J3QL84;J3KS44;J3QLV3;J3KRY6;Q9HC21-2;Q9HC21	J3KSB1;J3KSI7;J3QL84;J3KS44;J3QLV3;J3KRY6;Q9HC21-2;Q9HC21	Mitochondrial thiamine pyrophosphate carrier	SLC25A19
NaN	NaN	NaN	NaN	NaN	-1.4456			4	3	3	27	17.8	17.8	20.127	14.404	392340000	287370000	104970000	0	NaN	0	-1.5456	J3KS05;P83916;B5MD17;K7ELA4;C9JWS9	J3KS05;P83916;B5MD17;K7ELA4	Chromobox protein homolog 1	CBX1
NaN	NaN	NaN	NaN	NaN	NaN			1	1	1	8	8	8	14.209	2.7098	26199000	0	26199000	0	NaN	0	NaN	J3KS81;Q8N511	J3KS81;Q8N511	Transmembrane protein 199	TMEM199
NaN	NaN	NaN	NaN	NaN	NaN			1	1	1	1.4	1.4	1.4	80.321	2.4286	26891000	11721000	15170000	0	NaN	0	NaN	J3QQW9;Q15022	J3QQW9;Q15022	Polycomb protein SUZ12	SUZ12
NaN	NaN	NaN	NaN	NaN	NaN			4	3	3	6.1	4.8	4.8	69.948	4.0558	53075000	17255000	35820000	0	NaN	0	NaN	J9JID7;Q03252	J9JID7;Q03252	Lamin-B2	LMNB2
NaN	NaN	NaN	NaN	NaN	NaN			1	1	1	4.9	4.9	4.9	28.431	2.1863	34013000	0	34013000	0	NaN	0	NaN	K7EJB9;P27797	K7EJB9;P27797	Calreticulin	CALR
NaN	NaN	NaN	NaN	NaN	NaN			3	2	2	13.1	9.7	9.7	27.322	5.7859	166060000	74532000	91529000	0	NaN	0	NaN	K7EL62;P29992;A0A087WVZ3;E9PC54;Q03113-3;Q03113-2;P19086;O95837;P50148;Q03113	K7EL62;P29992	Guanine nucleotide-binding protein subunit alpha-11	GNA11
NaN	NaN	NaN	NaN	NaN	NaN			1	1	1	27.3	27.3	27.3	13.607	11.579	23329000	23329000	0	0	NaN	0	NaN	K7EM18;P41567	K7EM18;P41567	Eukaryotic translation initiation factor 1	EIF1
NaN	NaN	NaN	-3.84535	NaN	NaN			2	2	2	37.8	37.8	37.8	9.8329	16.345	91245000	87456000	3788800	0	NaN	0	-3.94535	K7EN45;Q13526;K7EMU7	K7EN45;Q13526;K7EMU7	Peptidyl-prolyl cis-trans isomerase NIMA-interacting 1	PIN1
NaN	NaN	NaN	NaN	NaN	NaN			1	1	1	12.9	12.9	12.9	10.888	2.2356	0	0	0	0	NaN	0	NaN	Q5JY01;Q5JY02;K7ENP1;Q7Z4G4-3;Q7Z4G4-2;Q7Z4G4	Q5JY01;Q5JY02;K7ENP1;Q7Z4G4-3;Q7Z4G4-2;Q7Z4G4	tRNA (guanine(10)-N2)-methyltransferase homolog	TRMT11
NaN	NaN	NaN	NaN	NaN	NaN			2	2	2	34.7	34.7	34.7	13.212	14.594	173510000	98245000	75263000	0	NaN	0	NaN	K7EP16;O75821;K7ENA8	K7EP16;O75821;K7ENA8	Eukaryotic translation initiation factor 3 subunit G	EIF3G
NaN	NaN	NaN	NaN	NaN	NaN			2	2	2	6.6	6.6	6.6	44.638	20.673	107960000	46091000	61866000	0	NaN	0	NaN	K7EQ03;K7EP90;Q9BTD8-4;Q9BTD8-2;Q9BTD8-3;Q9BTD8;K7ER08	K7EQ03;K7EP90;Q9BTD8-4;Q9BTD8-2;Q9BTD8-3;Q9BTD8;K7ER08	RNA-binding protein 42	RBM42
NaN	NaN	NaN	NaN	NaN	NaN			2	2	2	14.5	14.5	14.5	25.958	5.8467	35255000	1760200	33494000	0	NaN	0	NaN	K7EPL5;Q9BQ95-4;Q9BQ95-2;Q9BQ95;K7EIK2;K7EJI1;J3KTF5;K7EN32	K7EPL5;Q9BQ95-4;Q9BQ95-2;Q9BQ95;K7EIK2;K7EJI1;J3KTF5;K7EN32	Evolutionarily conserved signaling intermediate in Toll pathway, mitochondrial	ECSIT
NaN	NaN	NaN	NaN	NaN	NaN			1	1	1	5.2	5.2	5.2	26.924	3.0667	11376000	0	11376000	0	NaN	0	NaN	K7EPQ7;Q5BJH7-2;Q5BJH7-6;Q5BJH7-3;Q5BJH7	K7EPQ7;Q5BJH7-2;Q5BJH7-6;Q5BJH7-3;Q5BJH7	Protein YIF1B	YIF1B
NaN	NaN	NaN	NaN	NaN	NaN			1	1	1	9.1	9.1	9.1	13.98	3.8841	110700000	51280000	59424000	0	NaN	0	NaN	K7EQG1;Q9NXS2-3;Q9NXS2	K7EQG1;Q9NXS2-3;Q9NXS2	Glutaminyl-peptide cyclotransferase-like protein	QPCTL
NaN	NaN	NaN	NaN	NaN	NaN			3	1	1	61	27.1	27.1	6.8126	4.4493	0	0	0	0	NaN	0	NaN	K7EQW8	K7EQW8		TPM4
NaN	NaN	NaN	NaN	NaN	NaN			1	1	1	17.8	17.8	17.8	15.059	5.8079	3436600	3209700	226900	0	NaN	0	NaN	K7ERT7;Q99536	K7ERT7;Q99536	Synaptic vesicle membrane protein VAT-1 homolog	VAT1
NaN	NaN	NaN	-3.36394	NaN	NaN			2	2	2	62.5	62.5	62.5	7.0271	11.329	184420000	177430000	6989900	0	NaN	0	-3.46394	M0QXH0;Q99757	M0QXH0;Q99757	Thioredoxin, mitochondrial	TXN2
NaN	NaN	NaN	NaN	NaN	NaN			2	2	2	23.5	23.5	23.5	17.14	31.586	50080000	9015100	41065000	0	NaN	0	NaN	M0R0H5;M0QYR6;M0R1I2;Q03405-2;Q03405;M0QX27;M0QYS6;M0R2E9;M0R383;M0R0Y4;Q03405-3	M0R0H5;M0QYR6;M0R1I2;Q03405-2;Q03405;M0QX27;M0QYS6;M0R2E9;M0R383;M0R0Y4;Q03405-3	Urokinase plasminogen activator surface receptor	PLAUR
NaN	NaN	NaN	NaN	NaN	NaN			1	1	1	9.7	9.7	9.7	15.67	6.2174	56865000	56865000	0	0	NaN	0	NaN	M0QZL1;M0R192;P30043	M0QZL1;M0R192;P30043	Flavin reductase (NADPH)	BLVRB
NaN	NaN	NaN	NaN	NaN	NaN			1	1	1	15.6	15.6	15.6	18.912	6.1025	73774000	73774000	0	0	NaN	0	NaN	M0R0U3;M0R261;O95336	M0R0U3;M0R261;O95336	6-phosphogluconolactonase	PGLS
NaN	NaN	NaN	NaN	NaN	NaN			1	1	1	1.8	1.8	1.8	69.23	3.1594	62589000	8779000	53810000	0	NaN	0	NaN	M0R0W6;P30530-2;P30530	M0R0W6;P30530-2;P30530	Receptor protein-tyrosine kinase;Tyrosine-protein kinase receptor UFO	AXL
NaN	NaN	NaN	NaN	NaN	NaN			1	1	1	5	5	5	24.844	2.7612	33014000	0	33014000	0	NaN	0	NaN	M0R1Y2;P24390-2;P33947-2;P33947;P24390	M0R1Y2;P24390-2;P33947-2;P33947;P24390	ER lumen protein-retaining receptor;ER lumen protein-retaining receptor 1;ER lumen protein-retaining receptor 2	KDELR1;KDELR2
NaN	NaN	NaN	NaN	NaN	NaN			1	1	1	1.7	1.7	1.7	93.859	2.8073	17655000	6405900	11250000	0	NaN	0	NaN	M0R3F6;M0R2Z9;Q8IX01-4;Q8IX01-3;Q8IX01	M0R3F6;M0R2Z9;Q8IX01-4;Q8IX01-3;Q8IX01	SURP and G-patch domain-containing protein 2	SUGP2
NaN	NaN	NaN	NaN	NaN	NaN			6	2	1	15.5	7.3	4.7	49.129	2.4326	79239000	20292000	58948000	0	NaN	0	NaN	O00148;K7EQN7;O00148-3;O00148-2	O00148;K7EQN7;O00148-3;O00148-2	ATP-dependent RNA helicase DDX39A	DDX39A
NaN	NaN	NaN	NaN	NaN	NaN			2	2	2	6.3	6.3	6.3	28.775	2.291	6278600	1249900	5028700	0	NaN	0	NaN	Q5VYD6;O00165-4;O00165-6;O00165-5;O00165;O00165-2	Q5VYD6;O00165-4;O00165-6;O00165-5;O00165;O00165-2	HCLS1-associated protein X-1	HAX1
NaN	NaN	NaN	NaN	NaN	NaN			1	1	1	2.2	2.2	2.2	120.5	5.8755	15467000	15467000	0	0	NaN	0	NaN	O00267-2;O00267	O00267-2;O00267	Transcription elongation factor SPT5	SUPT5H
NaN	NaN	NaN	NaN	NaN	NaN			1	1	1	1.7	1.7	1.7	110.66	4.7369	53165000	29700000	23465000	0	NaN	0	NaN	O00291-3;O00291-4;O00291	O00291-3;O00291-4;O00291	Huntingtin-interacting protein 1	HIP1
NaN	NaN	NaN	NaN	NaN	NaN			2	2	2	6.6	6.6	6.6	39.336	4.2334	145850000	70451000	75396000	0	NaN	0	NaN	O00442;O00442-2;A6NIC1	O00442;O00442-2;A6NIC1	RNA 3-terminal phosphate cyclase	RTCA
NaN	NaN	NaN	NaN	NaN	NaN			1	1	1	8.4	8.4	8.4	34.577	2.224	23620000	4561000	19059000	0	NaN	0	NaN	O00487	O00487	26S proteasome non-ATPase regulatory subunit 14	PSMD14
NaN	NaN	NaN	NaN	NaN	NaN			1	1	1	12.8	12.8	12.8	32.113	10.885	20319000	15889000	4430200	0	NaN	0	NaN	O00625	O00625	Pirin	PIR
NaN	NaN	NaN	NaN	NaN	NaN			2	2	2	20.8	20.8	20.8	16.46	13.535	177810000	177810000	0	0	NaN	0	NaN	P47813;O14602;X6RAC9;A6NJH9	P47813;O14602;X6RAC9;A6NJH9	Eukaryotic translation initiation factor 1A, X-chromosomal;Eukaryotic translation initiation factor 1A, Y-chromosomal	EIF1AX;EIF1AY
NaN	NaN	NaN	NaN	NaN	NaN			3	3	3	16.2	16.2	16.2	35.201	16.112	73416000	3826200	69589000	0	NaN	0	NaN	O14828-2;O14828	O14828-2;O14828	Secretory carrier-associated membrane protein 3	SCAMP3
NaN	NaN	NaN	NaN	NaN	NaN			1	1	1	1.8	1.8	1.8	56.486	2.5753	16822000	4415200	12406000	0	NaN	0	NaN	O15091-4;O15091-2;O15091	O15091-4;O15091-2;O15091	Mitochondrial ribonuclease P protein 3	KIAA0391
NaN	NaN	NaN	NaN	NaN	NaN			2	2	2	7.6	7.6	7.6	36.648	6.602	395650000	20345000	375310000	0	NaN	0	NaN	O15127;H3BV04;H3BN93;H3BUB6;H3BPL9	O15127;H3BV04;H3BN93;H3BUB6;H3BPL9	Secretory carrier-associated membrane protein 2	SCAMP2
NaN	NaN	NaN	NaN	NaN	NaN			1	1	1	6.1	6.1	6.1	38.646	10.224	42100000	21037000	21063000	0	NaN	0	NaN	O15160-2;O15160	O15160-2;O15160	DNA-directed RNA polymerases I and III subunit RPAC1	POLR1C
NaN	NaN	NaN	NaN	NaN	NaN			4	4	4	1.1	1.1	1.1	399.73	3.1443	368710000	205290000	163420000	0	NaN	0	NaN	O15230	O15230	Laminin subunit alpha-5	LAMA5
NaN	NaN	NaN	NaN	NaN	NaN			35	1	0	66.3	2.2	0	73.525	8.9566	822730000	333300000	489430000	0	NaN	0	NaN	O15231;O15231-4	O15231;O15231-4	Zinc finger protein 185	ZNF185
NaN	NaN	NaN	NaN	NaN	NaN			34	1	0	63.7	2.5	0	76.856	17.473	122130000	43368000	78760000	0	NaN	0	NaN	O15231-6;O15231-9	O15231-6	Zinc finger protein 185	ZNF185
NaN	NaN	NaN	NaN	NaN	NaN			1	1	1	2	2	2	74.536	2.5765	31462000	9615700	21847000	0	NaN	0	NaN	O15294-4;O15294-2;O15294-3;O15294	O15294-4;O15294-2;O15294-3;O15294	UDP-N-acetylglucosamine--peptide N-acetylglucosaminyltransferase 110 kDa subunit	OGT
NaN	NaN	NaN	NaN	NaN	NaN			1	1	1	10.4	10.4	10.4	18.58	32.961	99217000	95658000	3559400	0	NaN	0	NaN	O15498-2;O15498	O15498-2;O15498	Synaptobrevin homolog YKT6	YKT6
NaN	NaN	NaN	NaN	NaN	NaN			1	1	1	6.7	6.7	6.7	19.312	2.9376	33776000	21063000	12713000	0	NaN	0	NaN	O15504-3;O15504	O15504-3;O15504	Nucleoporin-like protein 2	NUPL2
NaN	NaN	NaN	NaN	NaN	NaN			2	2	2	7.9	7.9	7.9	41.183	7.0242	40161000	8741600	31419000	0	NaN	0	NaN	O43242-2;O43242	O43242-2;O43242	26S proteasome non-ATPase regulatory subunit 3	PSMD3
NaN	NaN	NaN	NaN	NaN	4.15348			4	4	4	10.6	10.6	10.6	51.355	8.6757	67136000	7522100	59614000	0	NaN	0	4.05348	O43615;M0QXU7;M0QXM9	O43615;M0QXU7	Mitochondrial import inner membrane translocase subunit TIM44	TIMM44
NaN	NaN	NaN	NaN	NaN	NaN			1	1	1	2.1	2.1	2.1	71.689	2.5071	24188000	12988000	11200000	0	NaN	0	NaN	O60216	O60216	Double-strand-break repair protein rad21 homolog	RAD21
NaN	NaN	NaN	NaN	NaN	NaN			1	1	1	1.3	1.3	1.3	171.29	2.8355	6577300	5097200	1480100	0	NaN	0	NaN	O60306	O60306	Intron-binding protein aquarius	AQR
NaN	NaN	NaN	NaN	NaN	NaN			2	2	2	14.2	14.2	14.2	13.172	3.1111	9344900	1478900	7866000	0	NaN	0	NaN	O60493-3;O60493-2;O60493;O60493-4	O60493-3;O60493-2;O60493;O60493-4	Sorting nexin-3	SNX3
NaN	NaN	NaN	NaN	NaN	NaN			1	1	1	29.2	29.2	29.2	12.823	11.533	10903000	10903000	0	0	NaN	0	NaN	O60739	O60739	Eukaryotic translation initiation factor 1b	EIF1B
NaN	NaN	NaN	NaN	NaN	NaN			1	1	1	8.6	8.6	8.6	15.48	4.7209	20070000	18915000	1155600	0	NaN	0	NaN	O60869-2;O60869-3;O60869	O60869-2;O60869-3;O60869	Endothelial differentiation-related factor 1	EDF1
NaN	NaN	NaN	2.78184	NaN	5.01659			16	16	16	29.6	29.6	29.6	84.958	108.36	1033200000	41692000	991520000	0	NaN	0.739692	3.79921	O60934;A0A0C4DG07;E5RGU1;E5RGR7;A0A087X1V5;E2QRP0;E5RGN7	O60934;A0A0C4DG07	Nibrin	NBN
NaN	NaN	NaN	NaN	NaN	NaN			2	2	2	6.3	6.3	6.3	51.851	5.6301	86185000	23689000	62496000	0	NaN	0	NaN	O75306-2;O75306	O75306-2;O75306	NADH dehydrogenase [ubiquinone] iron-sulfur protein 2, mitochondrial	NDUFS2
NaN	NaN	NaN	-2.73389	NaN	NaN			2	2	2	47.4	47.4	47.4	12.774	14.689	82346000	76672000	5674100	0	NaN	0	-2.83389	O75368	O75368	SH3 domain-binding glutamic acid-rich-like protein	SH3BGRL
NaN	NaN	NaN	NaN	NaN	NaN			1	1	1	5.2	5.2	5.2	37.267	5.5835	6126600	6126600	0	0	NaN	0	NaN	O75475-3;O75475-2;O75475	O75475-3;O75475-2;O75475	PC4 and SFRS1-interacting protein	PSIP1
NaN	NaN	NaN	NaN	NaN	NaN			3	3	3	16.9	16.9	16.9	31.444	13.95	45466000	18384000	27081000	0	NaN	0	NaN	O75663;O75663-2	O75663;O75663-2	TIP41-like protein	TIPRL
NaN	NaN	NaN	NaN	NaN	NaN			8	4	4	12.8	6.8	6.8	74.761	5.7736	49448000	6674800	42773000	0	NaN	0	NaN	O75746;O75746-2;F8W9J0;H0YFB2;B4DGK6	O75746;O75746-2	Calcium-binding mitochondrial carrier protein Aralar1	SLC25A12
NaN	NaN	NaN	NaN	NaN	NaN			4	4	4	4.8	4.8	4.8	87.116	8.1959	137120000	2092800	135030000	0	NaN	0	NaN	O75843;H0YJ08;G3V532	O75843;H0YJ08	AP-1 complex subunit gamma-like 2	AP1G2
NaN	NaN	NaN	NaN	NaN	NaN			1	1	1	10.7	10.7	10.7	29.841	9.3709	3010600	3010600	0	0	NaN	0	NaN	O75937	O75937	DnaJ homolog subfamily C member 8	DNAJC8
NaN	NaN	NaN	NaN	NaN	NaN			1	1	1	4.2	4.2	4.2	26.711	3.0192	66800000	35173000	31627000	0	NaN	0	NaN	O75940	O75940	Survival of motor neuron-related-splicing factor 30	SMNDC1
NaN	NaN	NaN	NaN	NaN	NaN			2	2	2	9.2	9.2	9.2	39.133	2.5392	16291000	5833700	10457000	0	NaN	0	NaN	O75953;O75953-4;O75953-5	O75953;O75953-4;O75953-5	DnaJ homolog subfamily B member 5	DNAJB5
NaN	NaN	NaN	NaN	NaN	NaN			1	1	1	7.5	7.5	7.5	37.432	3.4855	6232600	6232600	0	0	NaN	0	NaN	O76003	O76003	Glutaredoxin-3	GLRX3
NaN	NaN	NaN	NaN	NaN	NaN			1	1	1	15.4	15.4	15.4	14.874	3.0467	1488700	339080	1149600	0	NaN	0	NaN	O95295	O95295	SNARE-associated protein Snapin	SNAPIN
NaN	NaN	NaN	NaN	NaN	NaN			2	2	2	20.8	20.8	20.8	11.399	2.3629	32423000	2141900	30281000	0	NaN	0	NaN	O95298-2;O95298;E9PRJ5	O95298-2;O95298;E9PRJ5	NADH dehydrogenase [ubiquinone] 1 subunit C2	NDUFC2
NaN	NaN	NaN	NaN	NaN	NaN			1	1	1	4.6	4.6	4.6	61.438	17.887	32245000	14950000	17295000	0	NaN	0	NaN	O95365	O95365	Zinc finger and BTB domain-containing protein 7A	ZBTB7A
NaN	NaN	NaN	NaN	NaN	NaN			1	1	1	28.6	28.6	28.6	9.7331	36.342	10750000	10750000	0	0	NaN	0	NaN	Q5QPN5;Q5QPN9;Q5QPQ3;Q5QPQ2;O95372	Q5QPN5;Q5QPN9;Q5QPQ3;Q5QPQ2;O95372	Acyl-protein thioesterase 2	LYPLA2
NaN	NaN	NaN	NaN	NaN	NaN			1	1	1	7.3	7.3	7.3	37.646	5.8504	17719000	12388000	5331500	0	NaN	0	NaN	O95400	O95400	CD2 antigen cytoplasmic tail-binding protein 2	CD2BP2
NaN	NaN	NaN	NaN	NaN	NaN			1	1	1	2.1	2.1	2.1	66.009	3.0753	22783000	12155000	10628000	0	NaN	0	NaN	O95486-2;O95486	O95486-2;O95486	Protein transport protein Sec24A	SEC24A
NaN	NaN	NaN	-2.7729	NaN	NaN			2	2	2	30.8	30.8	30.8	19.206	221.67	269460000	262570000	6898100	0	NaN	0	-2.8729	O95881	O95881	Thioredoxin domain-containing protein 12	TXNDC12
NaN	NaN	NaN	NaN	NaN	NaN			2	2	2	3	3	3	65.596	2.7988	32157000	5040400	27117000	0	NaN	0	NaN	O96005-3;O96005-4;O96005;K7EJ16	O96005-3;O96005-4;O96005;K7EJ16	Cleft lip and palate transmembrane protein 1	CLPTM1
NaN	NaN	NaN	4.15389	NaN	NaN			4	4	4	19.1	19.1	19.1	37.893	43.049	387380000	12970000	374410000	0	NaN	0	4.05389	O96008;K7EJ57;O96008-2;K7EKG4	O96008;K7EJ57;O96008-2;K7EKG4	Mitochondrial import receptor subunit TOM40 homolog	TOMM40
NaN	NaN	NaN	NaN	NaN	NaN			1	1	1	21.4	21.4	21.4	11.268	9.924	21387000	0	21387000	0	NaN	0	NaN	P00167-2;P00167-3;P00167	P00167-2;P00167-3;P00167	Cytochrome b5	CYB5A
NaN	NaN	NaN	NaN	NaN	NaN			1	1	1	5.4	5.4	5.4	29.95	2.5244	38369000	0	38369000	0	NaN	0	NaN	P00414	P00414	Cytochrome c oxidase subunit 3	MT-CO3
NaN	NaN	NaN	NaN	NaN	3.02694			3	3	3	15.1	15.1	15.1	24.579	4.5943	24320000	4237700	20083000	0	NaN	0	2.92694	P00492	P00492	Hypoxanthine-guanine phosphoribosyltransferase	HPRT1
NaN	NaN	NaN	-4.73312	NaN	NaN			5	5	5	24.2	24.2	24.2	41.428	95.297	591080000	583470000	7607600	0	NaN	0	-4.83312	P00558-2;P00558;P07205	P00558-2;P00558	Phosphoglycerate kinase 1	PGK1
NaN	NaN	NaN	NaN	NaN	NaN			2	2	2	13.5	13.5	13.5	29.246	12.541	180870000	180870000	0	0	NaN	0	NaN	P00918;E5RID5;E5RK37	P00918;E5RID5;E5RK37	Carbonic anhydrase 2	CA2
NaN	NaN	NaN	NaN	NaN	NaN			5	5	5	35.2	35.2	35.2	18.098	11.509	248000000	242060000	5936100	0	NaN	0	NaN	P01591;D6RD17;C9JA05;D6RHJ6	P01591;D6RD17;C9JA05;D6RHJ6	Immunoglobulin J chain	IGJ;JCHAIN
NaN	NaN	NaN	NaN	NaN	NaN			1	1	1	1.7	1.7	1.7	92.02	8.8941	48546000	10183000	38363000	0	NaN	0	NaN	P04035-2;P04035;P04035-3	P04035-2;P04035;P04035-3	3-hydroxy-3-methylglutaryl-coenzyme A reductase	HMGCR
NaN	NaN	NaN	NaN	NaN	NaN			2	2	2	8.7	8.7	8.7	38.714	5.0633	6603900	6603900	0	0	NaN	0	NaN	P04083;Q5T3N1	P04083;Q5T3N1	Annexin A1;Annexin	ANXA1
NaN	NaN	NaN	NaN	NaN	NaN			1	1	1	6.6	6.6	6.6	32.853	2.8424	3827100	3827100	0	0	NaN	0	NaN	P04181-2;P04181	P04181-2;P04181	Ornithine aminotransferase, mitochondrial;Ornithine aminotransferase, hepatic form;Ornithine aminotransferase, renal form	OAT
NaN	NaN	NaN	NaN	NaN	NaN			3	3	3	31.2	31.2	31.2	10.834	8.1365	140390000	135490000	4905900	0	NaN	0	NaN	P05109	P05109	Protein S100-A8;Protein S100-A8, N-terminally processed	S100A8
NaN	NaN	NaN	NaN	NaN	NaN			2	2	1	6.7	6.7	2.5	45.059	3.2346	173100000	133230000	39870000	0	NaN	0	NaN	P05121	P05121	Plasminogen activator inhibitor 1	SERPINE1
NaN	NaN	NaN	NaN	NaN	NaN			2	2	2	3.9	3.9	3.9	88.414	2.2467	28438000	0	28438000	0	NaN	0	NaN	P05556;P05556-2;P05556-5;P05556-4;P05556-3	P05556;P05556-2;P05556-5;P05556-4;P05556-3	Integrin beta-1	ITGB1
NaN	NaN	NaN	-3.25594	NaN	-0.827948			4	4	4	27.6	27.6	27.6	14.557	12.298	52301000	38148000	14154000	0	NaN	0.483782	-2.14195	P07741-2;P07741;H3BQF1;H3BQB1;H3BQZ9;H3BSW3	P07741-2;P07741;H3BQF1;H3BQB1;H3BQZ9	Adenine phosphoribosyltransferase	APRT
NaN	NaN	NaN	NaN	NaN	NaN			1	1	1	5.3	5.3	5.3	37.821	8.968	14873000	14420000	453730	0	NaN	0	NaN	P07858	P07858	Cathepsin B;Cathepsin B light chain;Cathepsin B heavy chain	CTSB
NaN	NaN	NaN	NaN	NaN	NaN			6	4	4	12.6	9.6	9.6	56.033	5.6118	158150000	76226000	81922000	0	NaN	0	NaN	P07948-2;P07948;H0Y3C5;J3KPD6;P08631-3;P08631-2;P08631-4;P08631;E5RJ37	P07948-2;P07948;H0Y3C5;J3KPD6;P08631-3;P08631-2;P08631-4;P08631	Tyrosine-protein kinase Lyn;Non-specific protein-tyrosine kinase;Tyrosine-protein kinase HCK	LYN;HCK
NaN	NaN	NaN	NaN	NaN	NaN			34	1	0	65.8	4.6	0	32.85	4.1687	103490000	21323000	82168000	0	NaN	0	NaN	P07951	P07951	Tropomyosin beta chain	TPM2
NaN	NaN	NaN	NaN	NaN	NaN			2	2	1	10.6	10.6	7.9	45.412	16.02	157470000	102790000	54675000	0	NaN	0	NaN	P08651-4;P08651-5;P08651-3;P08651-6;P08651-2;P08651	P08651-4;P08651-5;P08651-3;P08651-6;P08651-2;P08651	Nuclear factor 1 C-type	NFIC
NaN	NaN	NaN	NaN	NaN	NaN			45	2	1	84.9	10.2	5.6	32.865	14.174	347440000	111250000	236190000	0	NaN	0	NaN	P09493-10;P09493-4;P09493;H0YL52;H0YKX5;P09493-6;H0YKP3;H0YNC7;A0A087WTJ7;H0YKZ6;H0YLS7;H0YKJ4	P09493-10;P09493-4;P09493;H0YL52;H0YKX5;P09493-6;H0YKP3;H0YNC7	Tropomyosin alpha-1 chain	TPM1
NaN	NaN	NaN	NaN	NaN	NaN			2	2	2	4	4	4	74.634	8.8751	23168000	1523200	21644000	0	NaN	0	NaN	P09917-3;P09917;P09917-5;P09917-2	P09917-3;P09917;P09917-5;P09917-2	Arachidonate 5-lipoxygenase	ALOX5
NaN	NaN	NaN	NaN	NaN	NaN			3	3	3	10.9	10.9	10.9	29.668	3.1303	18779000	6275100	12504000	0	NaN	0	NaN	P47985;P0C7P4	P47985;P0C7P4	Cytochrome b-c1 complex subunit Rieske, mitochondrial;Cytochrome b-c1 complex subunit 11;Putative cytochrome b-c1 complex subunit Rieske-like protein 1	UQCRFS1;UQCRFS1P1
NaN	NaN	NaN	NaN	NaN	NaN			1	1	1	2.7	2.7	2.7	54.255	2.4554	8013300	1636200	6377100	0	NaN	0	NaN	X6R5C5;X6R8A1;P10619-2;P10619	X6R5C5;X6R8A1;P10619-2;P10619	Carboxypeptidase;Lysosomal protective protein;Lysosomal protective protein 32 kDa chain;Lysosomal protective protein 20 kDa chain	CTSA
NaN	NaN	NaN	NaN	NaN	NaN			1	1	1	1.4	1.4	1.4	83.978	5.2129	47574000	19952000	27621000	0	NaN	0	NaN	P12270-2;P12270	P12270-2;P12270	Nucleoprotein TPR	TPR
NaN	NaN	NaN	NaN	NaN	NaN			3	3	3	15.7	15.7	15.7	42.644	12.265	176140000	153140000	23005000	0	NaN	0	NaN	P12277;G3V4N7;G3V461;H0YJG0	P12277;G3V4N7	Creatine kinase B-type	CKB
NaN	NaN	NaN	NaN	NaN	2.09038			5	5	5	17.8	17.8	17.8	49.973	20.848	198070000	31581000	166490000	0	NaN	0	1.99038	P13489;E9PMJ3;E9PLZ3;E9PIM9;E9PMA9;E9PMN0;E9PIK5;H0YCR7;E9PR82;E9PMI1	P13489;E9PMJ3;E9PLZ3;E9PIM9	Ribonuclease inhibitor	RNH1
NaN	NaN	NaN	-0.407823	NaN	NaN			3	3	3	32.2	32.2	32.2	12.476	9.9516	358050000	185640000	172420000	0	NaN	0	-0.507823	P14174	P14174	Macrophage migration inhibitory factor	MIF
NaN	NaN	NaN	NaN	NaN	NaN			2	2	2	7.3	7.3	7.3	41.439	6.831	106810000	35457000	71350000	0	NaN	0	NaN	P14373-2;P14373;H0Y551	P14373-2;P14373;H0Y551	Zinc finger protein RFP	TRIM27
NaN	NaN	NaN	NaN	NaN	NaN			1	1	1	4.3	4.3	4.3	44.102	4.503	79679000	30577000	49102000	0	NaN	0	NaN	P14635-2;P14635	P14635-2;P14635	G2/mitotic-specific cyclin-B1	CCNB1
NaN	NaN	NaN	-3.29096	NaN	NaN			4	4	4	32	32	32	35.853	49.907	656800000	648910000	7882800	0	NaN	0	-3.39096	P15121;E9PCX2	P15121;E9PCX2	Aldose reductase	AKR1B1
NaN	NaN	NaN	-0.953411	NaN	NaN			4	4	4	16.2	16.2	16.2	30.375	37.506	347850000	272320000	75534000	0	NaN	0	-1.05341	P16152;E9PQ63;A8MTM1;P16152-2	P16152	Carbonyl reductase [NADPH] 1	CBR1
NaN	NaN	NaN	NaN	-0.534746	-0.791707			15	2	2	74.6	7.9	7.9	31.947	40.893	313390000	196360000	117030000	0	NaN	0.973989	-0.763227	P16989-2;A0A0D9SEI8	P16989-2	Y-box-binding protein 3	YBX3
NaN	NaN	NaN	NaN	NaN	NaN			2	2	2	12.5	12.5	12.5	21.541	6.6043	34686000	669160	34017000	0	NaN	0	NaN	P17152	P17152	Transmembrane protein 11, mitochondrial	TMEM11
NaN	NaN	NaN	NaN	NaN	NaN			2	2	2	9.2	9.2	9.2	43.008	8.0497	38862000	17085000	21776000	0	NaN	0	NaN	P17302	P17302	Gap junction alpha-1 protein	GJA1
NaN	NaN	NaN	NaN	2.73866	NaN			5	5	5	10.3	10.3	10.3	79.994	16.383	85163000	10144000	75019000	0	NaN	0	2.63866	P17655;P17655-2	P17655;P17655-2	Calpain-2 catalytic subunit	CAPN2
NaN	NaN	NaN	NaN	NaN	NaN			2	2	1	2.8	2.8	1.6	61.52	2.7493	183370000	52959000	130410000	0	NaN	0	NaN	P19532;P19532-2	P19532;P19532-2	Transcription factor E3	TFE3
NaN	NaN	NaN	NaN	NaN	NaN			2	2	2	21.6	21.6	21.6	17.699	32.54	156840000	86294000	70547000	0	NaN	0	NaN	P20290-2;P20290;H0Y9Y1;D6RDG3	P20290-2;P20290;H0Y9Y1;D6RDG3	Transcription factor BTF3	BTF3
NaN	NaN	NaN	NaN	NaN	NaN			1	1	1	12	12	12	14.066	6.5853	40325000	3963800	36361000	0	NaN	0	NaN	S4R3Q3;P20336	S4R3Q3;P20336	Ras-related protein Rab-3A	RAB3A
NaN	NaN	NaN	-3.42889	NaN	NaN			5	2	2	34.8	18.9	18.9	22.178	13.845	22241000	21032000	1209600	0	NaN	0	-3.52889	P20339-2;P20339	P20339-2;P20339	Ras-related protein Rab-5A	RAB5A
NaN	NaN	NaN	NaN	NaN	NaN			142	1	1	68.5	0.6	0.6	280.01	12.651	807710000	383400000	424310000	0	NaN	0	NaN	P21333-2;P21333;Q5HY54	P21333-2;P21333;Q5HY54	Filamin-A	FLNA
NaN	NaN	NaN	NaN	NaN	NaN			1	1	1	3.1	3.1	3.1	98.398	2.4012	3604500	3604500	0	0	NaN	0	NaN	P21399	P21399	Cytoplasmic aconitate hydratase	ACO1
NaN	NaN	NaN	NaN	NaN	NaN			2	2	2	3.5	3.5	3.5	113.8	9.7681	36040000	7876100	28164000	0	NaN	0	NaN	P22314-2;P22314;Q5JRR6	P22314-2;P22314;Q5JRR6	Ubiquitin-like modifier-activating enzyme 1	UBA1
NaN	NaN	NaN	NaN	NaN	NaN			1	1	1	11.6	11.6	11.6	18.884	7.0733	14418000	13843000	575360	0	NaN	0	NaN	P23434	P23434	Glycine cleavage system H protein, mitochondrial	GCSH
NaN	NaN	NaN	NaN	NaN	NaN			3	3	3	16.2	16.2	16.2	27.016	5.9529	23306000	5336400	17970000	0	NaN	0	NaN	P25685-2;P25685;M0R080;M0R1D6;M0QZD0;M0QYT3;M0QXK0;Q9UDY4	P25685-2;P25685;M0R080	DnaJ homolog subfamily B member 1	DNAJB1
NaN	NaN	NaN	NaN	NaN	NaN			3	3	3	42.3	42.3	42.3	15.649	12.375	69643000	69643000	0	0	NaN	0	NaN	P26885;F5H0N4	P26885	Peptidyl-prolyl cis-trans isomerase FKBP2	FKBP2
NaN	NaN	NaN	NaN	NaN	NaN			1	1	1	6.3	6.3	6.3	35.554	3.6681	2655700	2655700	0	0	NaN	0	NaN	P27695	P27695	DNA-(apurinic or apyrimidinic site) lyase;DNA-(apurinic or apyrimidinic site) lyase, mitochondrial	APEX1
NaN	NaN	NaN	NaN	NaN	NaN			4	4	4	16.7	16.7	16.7	28.48	8.8952	24193000	2035300	22157000	0	NaN	0	NaN	P28074;H0YJM8;P28074-3;P28074-2	P28074;H0YJM8;P28074-3;P28074-2	Proteasome subunit beta type-5	PSMB5
NaN	NaN	NaN	NaN	NaN	NaN			2	2	2	6.5	6.5	6.5	46.944	4.3153	20297000	12329000	7968100	0	NaN	0	NaN	P28300	P28300	Protein-lysine 6-oxidase	LOX
NaN	NaN	NaN	-3.39874	NaN	NaN			2	2	2	26.3	26.3	26.3	12.712	8.9215	21812000	20445000	1367700	0	NaN	0	-3.49874	P30046;H7C342;J3KQ18;B5MC82;P30046-2;A6NHG4	P30046;H7C342;J3KQ18;B5MC82;P30046-2;A6NHG4	D-dopachrome decarboxylase;D-dopachrome decarboxylase-like protein	DDT;DDTL
NaN	NaN	NaN	-1.91501	NaN	NaN			4	4	4	50.3	50.3	50.3	21.057	228.32	1312700000	1307100000	5600100	0	NaN	0	-2.01501	P30086	P30086	Phosphatidylethanolamine-binding protein 1;Hippocampal cholinergic neurostimulating peptide	PEBP1
NaN	NaN	NaN	NaN	NaN	NaN			1	1	1	20	20	20	15.35	15.473	14200000	14200000	0	0	NaN	0	NaN	R4GN99;P30405-2;P30405	R4GN99;P30405-2;P30405	Peptidyl-prolyl cis-trans isomerase;Peptidyl-prolyl cis-trans isomerase F, mitochondrial	PPIF
NaN	NaN	NaN	NaN	NaN	NaN			2	2	2	11.4	11.4	11.4	50.582	12.057	11862000	11862000	0	0	NaN	0	NaN	P31150;Q5SX91;Q5SX87;P50395-2;P50395	P31150;Q5SX91;Q5SX87;P50395-2;P50395	Rab GDP dissociation inhibitor alpha;Rab GDP dissociation inhibitor beta	GDI1;GDI2
NaN	NaN	NaN	NaN	NaN	NaN			4	4	4	17.8	17.8	17.8	27.679	10.47	46524000	45855000	669110	0	NaN	0	NaN	P31944	P31944	Caspase-14;Caspase-14 subunit p17, mature form;Caspase-14 subunit p10, mature form;Caspase-14 subunit p20, intermediate form;Caspase-14 subunit p8, intermediate form	CASP14
NaN	NaN	NaN	NaN	NaN	NaN			1	1	1	3.9	3.9	3.9	59.777	4.9085	11411000	11411000	0	0	NaN	0	NaN	P31948-3;P31948;P31948-2	P31948-3;P31948;P31948-2	Stress-induced-phosphoprotein 1	STIP1
NaN	NaN	NaN	NaN	NaN	3.03656			1	1	1	6.8	6.8	6.8	16.185	2.5693	35693000	11457000	24236000	0	NaN	0	2.93656	P32320	P32320	Cytidine deaminase	CDA
NaN	NaN	NaN	NaN	1.52266	NaN			3	3	3	6.5	6.5	6.5	96.557	31.542	622570000	216730000	405840000	0	NaN	0	1.42266	P33991;E5RFJ8;E5RG31	P33991	DNA replication licensing factor MCM4	MCM4
NaN	NaN	NaN	NaN	NaN	NaN			3	3	3	6.2	6.2	6.2	53.454	6.5919	55970000	37435000	18535000	0	NaN	0	NaN	P34897-3;P34897-2;P34897;G3V2Y4;H0YIZ0;G3V2D2;G3V540;G3V5L0;G3V4W5;P34896-4;P34896-3;P34896-2;P34896	P34897-3;P34897-2;P34897;G3V2Y4;H0YIZ0	Serine hydroxymethyltransferase, mitochondrial;Serine hydroxymethyltransferase	SHMT2
NaN	NaN	NaN	NaN	NaN	NaN			2	2	2	9	9	9	42.621	18.101	17972000	17972000	0	0	NaN	0	NaN	P35237;A0A024QZX5;A0A087X1N8	P35237;A0A024QZX5;A0A087X1N8	Serpin B6	SERPINB6
NaN	NaN	NaN	NaN	3.82212	NaN			2	2	2	3.3	3.3	3.3	99.045	15.993	74638000	16694000	57944000	0	NaN	0	3.72212	P35606-2;P35606;D6RBZ7;D6RCL6;D6RBG7;D6RBT6;D6R997	P35606-2;P35606;D6RBZ7;D6RCL6;D6RBG7;D6RBT6;D6R997	Coatomer subunit beta	COPB2
NaN	NaN	NaN	NaN	NaN	NaN			1	1	1	15.9	15.9	15.9	13.176	8.7057	14772000	14772000	0	0	NaN	0	NaN	V9GYD0;P36404-2;P36404	V9GYD0;P36404-2;P36404	ADP-ribosylation factor-like protein 2	ARL2-SNX15;ARL2
NaN	NaN	NaN	NaN	NaN	NaN			2	2	2	10.4	10.4	10.4	20.455	64.309	143210000	142260000	950520	0	NaN	0	NaN	P36405	P36405	ADP-ribosylation factor-like protein 3	ARL3
NaN	NaN	NaN	NaN	NaN	NaN			1	1	1	1.8	1.8	1.8	61.068	2.4495	21006000	20274000	731830	0	NaN	0	NaN	P36406-3;P36406-2;P36406	P36406-3;P36406-2;P36406	E3 ubiquitin-protein ligase TRIM23	TRIM23
NaN	NaN	NaN	NaN	NaN	NaN			12	1	1	35	4	4	32.881	2.2235	0	0	0	0	NaN	0	NaN	P36542-2	P36542-2	ATP synthase subunit gamma, mitochondrial	ATP5C1
NaN	NaN	NaN	NaN	NaN	NaN			1	1	1	3.6	3.6	3.6	61.448	20.357	47065000	47065000	0	0	NaN	0	NaN	P36871;P36871-2	P36871;P36871-2	Phosphoglucomutase-1	PGM1
NaN	NaN	NaN	NaN	NaN	NaN			2	2	2	2	2	2	157.89	7.4607	24396000	3286200	21110000	0	NaN	0	NaN	P39880-5;P39880-2;P39880;P39880-3;Q13948-9;Q13948-10;Q13948-2;Q13948;P39880-6;P39880-4	P39880-5;P39880-2;P39880;P39880-3;Q13948-9;Q13948-10;Q13948-2;Q13948;P39880-6;P39880-4	Homeobox protein cut-like 1;Protein CASP	CUX1
NaN	NaN	NaN	NaN	NaN	NaN			2	2	2	8.9	8.9	8.9	35.503	12.002	33071000	23388000	9682800	0	NaN	0	NaN	P40926;G3XAL0;P40926-2	P40926;G3XAL0;P40926-2	Malate dehydrogenase, mitochondrial;Malate dehydrogenase	MDH2
NaN	NaN	NaN	NaN	NaN	NaN			3	1	1	9.1	3.6	3.6	34.342	2.8082	69885000	27555000	42329000	0	NaN	0	NaN	P43355	P43355	Melanoma-associated antigen 1	MAGEA1
NaN	NaN	NaN	NaN	NaN	NaN			1	1	1	16	16	16	22.763	16.986	8208500	8208500	0	0	NaN	0	NaN	P45877	P45877	Peptidyl-prolyl cis-trans isomerase C	PPIC
NaN	NaN	NaN	NaN	NaN	NaN			1	1	1	4.3	4.3	4.3	34.579	3.6252	98503000	31443000	67060000	0	NaN	0	NaN	P48651-3;P48651-2;P48651	P48651-3;P48651-2;P48651	Phosphatidylserine synthase 1	PTDSS1
NaN	NaN	NaN	NaN	NaN	NaN			2	2	2	3.5	3.5	3.5	81.742	14.522	41933000	0	41933000	0	NaN	0	NaN	P48960-2;P48960-3;P48960	P48960-2;P48960-3;P48960	CD97 antigen;CD97 antigen subunit alpha;CD97 antigen subunit beta	CD97
NaN	NaN	NaN	3.64939	NaN	NaN			5	5	5	20.6	20.6	20.6	33.269	20.691	167950000	10932000	157020000	0	NaN	0	3.54939	P49247	P49247	Ribose-5-phosphate isomerase	RPIA
NaN	NaN	NaN	NaN	NaN	NaN			2	2	2	12.1	12.1	12.1	45.793	51.139	297640000	297640000	0	0	NaN	0	NaN	Q5T624;P49321-2;P49321;H0YDS9;E9PI86;E9PRH9;H0YF33;P49321-4;P49321-3	Q5T624;P49321-2;P49321;H0YDS9;E9PI86;E9PRH9;H0YF33;P49321-4;P49321-3	Nuclear autoantigenic sperm protein	NASP
NaN	NaN	NaN	NaN	NaN	NaN			1	1	1	2.5	2.5	2.5	82.785	5.2387	0	0	0	0	NaN	0	NaN	P49711	P49711	Transcriptional repressor CTCF	CTCF
NaN	NaN	NaN	NaN	NaN	NaN			2	2	2	14.9	14.9	14.9	22.836	13.051	160740000	56916000	103830000	0	NaN	0	NaN	P49721;A0A087WVV1	P49721;A0A087WVV1	Proteasome subunit beta type-2	PSMB2
NaN	NaN	NaN	NaN	NaN	NaN			3	3	3	11.2	11.2	11.2	48.824	16.148	132720000	69379000	63340000	0	NaN	0	NaN	P49757-8;P49757-7;P49757-6;P49757-5;P49757-4;P49757-2;P49757-3;P49757;G3V3Z8;P49757-9;G3V3M5;G3V3R1	P49757-8;P49757-7;P49757-6;P49757-5;P49757-4;P49757-2;P49757-3;P49757;G3V3Z8;P49757-9	Protein numb homolog	NUMB
NaN	NaN	NaN	-4.466	NaN	NaN			4	4	4	39.7	39.7	39.7	13.802	129.54	794360000	782210000	12150000	0	NaN	0	-4.566	P49773	P49773	Histidine triad nucleotide-binding protein 1	HINT1
NaN	NaN	NaN	NaN	NaN	NaN			2	2	2	12.4	12.4	12.4	24.635	5.6435	37633000	15879000	21755000	0	NaN	0	NaN	P49795	P49795	Regulator of G-protein signaling 19	RGS19
NaN	NaN	NaN	NaN	NaN	3.3225			2	2	2	9.8	9.8	9.8	65.928	33.252	41765000	16960000	24805000	0	NaN	0	3.2225	P49915-2;P49915	P49915-2;P49915	GMP synthase [glutamine-hydrolyzing]	GMPS
NaN	NaN	NaN	NaN	0.410884	NaN			1	1	1	16.2	16.2	16.2	7.2053	2.2827	30346000	13086000	17260000	0	NaN	0	0.310884	P50151	P50151	Guanine nucleotide-binding protein G(I)/G(S)/G(O) subunit gamma-10	GNG10
NaN	NaN	NaN	NaN	NaN	1.51304			5	5	5	19.4	19.4	19.4	46.44	18.202	136960000	38906000	98056000	0	NaN	0	1.41304	P50454;E9PKH2;H0YEP8;E9PNX1;E9PK86;E9PMI5;E9PR70;E9PPV6;E9PQ34;E9PJH8;E9PIG2;E9PRS3	P50454;E9PKH2	Serpin H1	SERPINH1
NaN	NaN	NaN	NaN	NaN	NaN			2	1	1	12.3	6.9	6.9	22.774	2.174	16072000	1592200	14480000	0	NaN	0	NaN	P51153;A0A087WWB9	P51153;A0A087WWB9	Ras-related protein Rab-13	RAB13
NaN	NaN	NaN	NaN	NaN	NaN			2	2	2	18.8	18.8	18.8	16.162	36.318	53488000	51209000	2279200	0	NaN	0	NaN	P51452-2;P51452;K7ELG5;K7ES89	P51452-2;P51452;K7ELG5;K7ES89	Dual specificity protein phosphatase 3	DUSP3
NaN	NaN	NaN	NaN	NaN	NaN			1	1	1	12.3	12.3	12.3	20.12	5.1431	5053300	5053300	0	0	NaN	0	NaN	P51809-3;P51809;P51809-2	P51809-3;P51809;P51809-2	Vesicle-associated membrane protein 7	VAMP7
NaN	NaN	NaN	NaN	NaN	NaN			1	1	1	1	1	1	119.16	2.9416	0	0	0	0	NaN	0	NaN	P52732	P52732	Kinesin-like protein KIF11	KIF11
NaN	NaN	NaN	NaN	NaN	NaN			1	1	1	6.1	6.1	6.1	33.428	9.1924	10639000	10639000	0	0	NaN	0	NaN	P53004	P53004	Biliverdin reductase A	BLVRA
NaN	NaN	NaN	NaN	0.892974	NaN			3	3	3	8.6	8.6	8.6	68.254	10.454	138970000	45164000	93810000	0	NaN	0	0.792974	P53350;I3L387	P53350	Serine/threonine-protein kinase PLK1	PLK1
NaN	NaN	NaN	NaN	NaN	NaN			3	3	3	14.3	14.3	14.3	31.512	5.149	118440000	884720	117560000	0	NaN	0	NaN	P54709;C9JA36;P54709-2;H7C4L9;H7C547;F8WBY4;C9JXZ1	P54709;C9JA36;P54709-2	Sodium/potassium-transporting ATPase subunit beta-3	ATP1B3
NaN	NaN	NaN	NaN	NaN	2.19267			4	4	4	5.5	5.5	5.5	87.088	8.1045	98907000	30608000	68299000	0	NaN	0	2.09267	P54886-2;P54886	P54886-2;P54886	Delta-1-pyrroline-5-carboxylate synthase;Glutamate 5-kinase;Gamma-glutamyl phosphate reductase	ALDH18A1
NaN	NaN	NaN	NaN	NaN	NaN			1	1	1	6.1	6.1	6.1	36.579	26.096	40645000	40645000	0	0	NaN	0	NaN	P55263-4;P55263-2;P55263	P55263-4;P55263-2;P55263	Adenosine kinase	ADK
NaN	NaN	NaN	NaN	NaN	NaN			4	2	2	70.9	27.3	27.3	6.2953	7.4267	53662000	14083000	39579000	0	NaN	0	NaN	P56134-3;P56134	P56134-3;P56134	ATP synthase subunit f, mitochondrial	ATP5J2
NaN	NaN	NaN	NaN	3.76384	5.41596			3	3	3	45.1	45.1	45.1	5.8068	5.0427	377850000	38017000	339830000	0	NaN	0.936173	4.4899	Q5VTU8;P56381	Q5VTU8;P56381	ATP synthase subunit epsilon-like protein, mitochondrial;ATP synthase subunit epsilon, mitochondrial	ATP5EP2;ATP5E
NaN	NaN	NaN	NaN	NaN	NaN			1	1	1	6.1	6.1	6.1	27.11	3.1831	0	0	0	0	NaN	0	NaN	P56749	P56749	Claudin-12	CLDN12
NaN	NaN	NaN	NaN	NaN	NaN			3	3	3	2.3	2.3	2.3	103.17	2.6108	29702000	5436900	24265000	0	NaN	0	NaN	P57740-2;P57740;P57740-3	P57740-2;P57740;P57740-3	Nuclear pore complex protein Nup107	NUP107
NaN	NaN	NaN	NaN	NaN	NaN			5	5	5	38.9	38.9	38.9	17.958	44.433	553700000	550920000	2785100	0	NaN	0	NaN	P60174-4;P60174-1;P60174;U3KPZ0;U3KQF3	P60174-4;P60174-1;P60174;U3KPZ0	Triosephosphate isomerase	TPI1
NaN	NaN	NaN	NaN	NaN	NaN			4	1	1	26.4	8	8	19.09	2.48	4382000	0	4382000	0	NaN	0	NaN	P61020-2;P61020	P61020-2;P61020	Ras-related protein Rab-5B	RAB5B
NaN	NaN	NaN	NaN	NaN	NaN			2	2	2	26.1	26.1	26.1	17.447	65.75	127470000	127470000	0	0	NaN	0	NaN	P61086-3;P61086;D6RDM7;P61086-2	P61086-3;P61086;D6RDM7;P61086-2	Ubiquitin-conjugating enzyme E2 K	UBE2K
NaN	NaN	NaN	NaN	NaN	NaN			3	3	3	21	21	21	20.409	9.7961	152080000	30515000	121570000	0	NaN	0	NaN	X6RFL8;P61106	X6RFL8;P61106	Ras-related protein Rab-14	RAB14
NaN	NaN	NaN	NaN	NaN	NaN			1	1	1	3	3	3	67.314	6.9437	7321100	7321100	0	0	NaN	0	NaN	P61221	P61221	ATP-binding cassette sub-family E member 1	ABCE1
NaN	NaN	NaN	NaN	NaN	NaN			3	2	2	28.4	21.6	21.6	10.932	4.2632	27589000	12713000	14876000	0	NaN	0	NaN	P61604;B8ZZ54;B8ZZL8	P61604;B8ZZ54;B8ZZL8	10 kDa heat shock protein, mitochondrial	HSPE1
NaN	NaN	NaN	NaN	NaN	NaN			1	1	1	41.2	41.2	41.2	9.1175	8.2849	8098600	8098600	0	0	NaN	0	NaN	P61960;P61960-2	P61960;P61960-2	Ubiquitin-fold modifier 1	UFM1
NaN	NaN	NaN	NaN	NaN	NaN			1	1	1	3.2	3.2	3.2	38.926	2.4358	0	0	0	0	NaN	0	NaN	P61962	P61962	DDB1- and CUL4-associated factor 7	DCAF7
NaN	NaN	NaN	NaN	NaN	NaN			1	1	1	23.2	23.2	23.2	5.9446	2.3424	67872000	67872000	0	0	NaN	0	NaN	V9GYQ5;V9GZ59;P61964	V9GYQ5;V9GZ59;P61964	WD repeat-containing protein 5	WDR5
NaN	NaN	NaN	NaN	NaN	NaN			3	3	3	32.6	32.6	32.6	20.082	17.614	97896000	93487000	4409500	0	NaN	0	NaN	P62330	P62330	ADP-ribosylation factor 6	ARF6
NaN	NaN	NaN	NaN	NaN	NaN			4	1	1	30.7	8.3	8.3	22.677	7.24	7274700	7274700	0	0	NaN	0	NaN	P62820;E7END7;P62820-3;P62820-2	P62820;E7END7;P62820-3;P62820-2	Ras-related protein Rab-1A	RAB1A
NaN	NaN	NaN	NaN	NaN	NaN			1	1	1	13.4	13.4	13.4	7.645	2.5467	71069000	33463000	37606000	0	NaN	0	NaN	P62875	P62875	DNA-directed RNA polymerases I, II, and III subunit RPABC5	POLR2L
NaN	NaN	NaN	NaN	NaN	NaN			3	3	3	52.2	52.2	52.2	10.118	22.554	362120000	361540000	581390	0	NaN	0	NaN	Q1JUQ5;Q5W0X3;P62942;Q5VVH2	Q1JUQ5;Q5W0X3;P62942;Q5VVH2	Peptidyl-prolyl cis-trans isomerase;Peptidyl-prolyl cis-trans isomerase FKBP1A	FKBP12-Exip2;FKBP1A;FKBP1C
NaN	NaN	NaN	-4.20001	NaN	NaN			5	5	5	44.8	44.8	44.8	17.861	91.887	98159000	91736000	6422900	0	NaN	0	-4.30001	P68036;P68036-3;P68036-2	P68036;P68036-3;P68036-2	Ubiquitin-conjugating enzyme E2 L3	UBE2L3
NaN	NaN	NaN	0.502229	NaN	NaN			3	3	3	16.9	16.9	16.9	22.999	4.2971	54951000	26150000	28801000	0	NaN	0	0.402229	P82664	P82664	28S ribosomal protein S10, mitochondrial	MRPS10
NaN	NaN	NaN	NaN	NaN	0.207893			1	1	1	3.7	3.7	3.7	48.006	13.496	167480000	87182000	80298000	0	NaN	0	0.107893	P82675	P82675	28S ribosomal protein S5, mitochondrial	MRPS5
NaN	NaN	NaN	NaN	NaN	NaN			2	2	2	16.1	16.1	16.1	20.459	3.1628	14021000	5446100	8574800	0	NaN	0	NaN	P82912-2;P82912;H0YL99;P82912-3	P82912-2;P82912;H0YL99;P82912-3	28S ribosomal protein S11, mitochondrial	MRPS11
NaN	NaN	NaN	NaN	NaN	NaN			2	2	2	33.8	33.8	33.8	16.786	125.81	63054000	63054000	0	0	NaN	0	NaN	P83876;K7EPA6;K7EJU2;K7ESL1;K7EMX5;O14835;K7ES07	P83876;K7EPA6;K7EJU2;K7ESL1;K7EMX5;O14835;K7ES07	Thioredoxin-like protein 4A	TXNL4A
NaN	NaN	NaN	NaN	0.63812	1.68746			2	2	2	5.9	5.9	5.9	48.08	5.4713	89650000	29816000	59833000	0	NaN	0.534711	1.06279	P84022;H0YMP2;H0YL71;H3BP09;H3BVD1;K7EJX0;B7Z5N5;P84022-3;P84022-2;O15198-2;Q15796-2;Q15796;O15198	P84022;H0YMP2;H0YL71;H3BP09;H3BVD1;K7EJX0;B7Z5N5;P84022-3;P84022-2;O15198-2;Q15796-2;Q15796;O15198	Mothers against decapentaplegic homolog 3;Mothers against decapentaplegic homolog;Mothers against decapentaplegic homolog 9;Mothers against decapentaplegic homolog 2	SMAD3;SMAD2;SMAD9
NaN	NaN	NaN	NaN	NaN	1.53978			6	2	2	45.6	15.6	15.6	20.529	12.22	200240000	102910000	97335000	0	NaN	0	1.43978	P84085;C9J1Z8	P84085;C9J1Z8	ADP-ribosylation factor 5	ARF5
NaN	NaN	NaN	NaN	NaN	NaN			3	3	3	21.1	21.1	21.1	31.806	36.509	277440000	276770000	671230	0	NaN	0	NaN	Q00169;I3L471;I3L4U7;F5GWE5;I3L3W1;I3L2X8;I3L4C0;I3L459;I3L4H1	Q00169;I3L471;I3L4U7;F5GWE5	Phosphatidylinositol transfer protein alpha isoform	PITPNA
NaN	NaN	NaN	NaN	NaN	NaN			13	1	1	46.1	5.3	5.3	41.59	6.28	159410000	70799000	88615000	0	NaN	0	NaN	Q01085;E7ETJ9;E7ETC0;A6NKZ9	Q01085;E7ETJ9;E7ETC0	Nucleolysin TIAR	TIAL1
NaN	NaN	NaN	NaN	NaN	NaN			3	3	3	8.9	8.9	8.9	51.83	27.647	115310000	115310000	0	0	NaN	0	NaN	Q01518-2;Q01518;Q5T0R7;Q5T0R6;Q5T0R5;Q5T0R4;Q5T0R3;Q5T0R2;Q5T0R1;Q5T0R9	Q01518-2;Q01518	Adenylyl cyclase-associated protein 1	CAP1
NaN	NaN	NaN	NaN	NaN	NaN			1	1	1	3.5	3.5	3.5	57.293	3.2297	5290900	0	5290900	0	NaN	0	NaN	Q01581	Q01581	Hydroxymethylglutaryl-CoA synthase, cytoplasmic	HMGCS1
NaN	NaN	NaN	NaN	NaN	3.16113			3	3	3	7.7	7.7	7.7	55.01	5.0473	219980000	33582000	186400000	0	NaN	0	3.06113	Q01650;H0YJ95;A0A0C4DGL4;G3V4Z6;Q9UM01;Q92536	Q01650	Large neutral amino acids transporter small subunit 1	SLC7A5
NaN	NaN	NaN	NaN	NaN	NaN			1	1	1	18.6	18.6	18.6	12.133	5.5925	0	0	0	0	NaN	0	NaN	V9GYV7;Q5VSR5;Q01813-2;Q01813	V9GYV7;Q5VSR5;Q01813-2;Q01813	ATP-dependent 6-phosphofructokinase, platelet type	PFKP
NaN	NaN	NaN	NaN	NaN	NaN			4	4	4	5.3	5.3	5.3	113.75	13.327	188660000	57412000	131250000	0	NaN	0	NaN	Q02413;Q02413-2	Q02413	Desmoglein-1	DSG1
NaN	NaN	NaN	NaN	NaN	NaN			1	1	1	9.5	9.5	9.5	19.043	2.3988	30682000	18497000	12185000	0	NaN	0	NaN	Q04760-2;Q04760	Q04760-2;Q04760	Lactoylglutathione lyase	GLO1
NaN	NaN	NaN	NaN	NaN	NaN			1	1	1	6.8	6.8	6.8	57.398	8.3805	5060200	5060200	0	0	NaN	0	NaN	Q06203	Q06203	Amidophosphoribosyltransferase	PPAT
NaN	NaN	NaN	NaN	NaN	NaN			1	1	1	7.9	7.9	7.9	18.129	4.8012	13606000	13606000	0	0	NaN	0	NaN	Q07812-5;Q07812-7;Q07812-8;Q07812;Q07812-2	Q07812-5;Q07812-7;Q07812-8;Q07812;Q07812-2	Apoptosis regulator BAX	BAX
NaN	NaN	NaN	NaN	NaN	NaN			3	3	3	5.9	5.9	5.9	76.631	8.0694	9116800	9116800	0	0	NaN	0	NaN	Q08188	Q08188	Protein-glutamine gamma-glutamyltransferase E;Protein-glutamine gamma-glutamyltransferase E 50 kDa catalytic chain;Protein-glutamine gamma-glutamyltransferase E 27 kDa non-catalytic chain	TGM3
NaN	NaN	NaN	NaN	NaN	NaN			2	2	2	2.9	2.9	2.9	93.834	3.3195	19703000	19703000	0	0	NaN	0	NaN	Q08554-2;Q08554	Q08554-2;Q08554	Desmocollin-1	DSC1
NaN	NaN	NaN	NaN	NaN	NaN			2	2	2	2.9	2.9	2.9	176.8	3.3617	318270000	149740000	168530000	0	NaN	0	NaN	Q12774;H0Y895;Q12774-2	Q12774;H0Y895;Q12774-2	Rho guanine nucleotide exchange factor 5	ARHGEF5
NaN	NaN	NaN	NaN	NaN	-0.629523			2	2	2	3.1	3.1	3.1	89.034	4.2593	41746000	23373000	18373000	0	NaN	0	-0.729523	Q12788;J3KNP2	Q12788;J3KNP2	Transducin beta-like protein 3	TBL3
NaN	NaN	NaN	NaN	NaN	NaN			2	2	2	2.5	2.5	2.5	127.06	2.6813	11500000	3186700	8313200	0	NaN	0	NaN	Q12965;H0YLE5;O00160	Q12965;H0YLE5;O00160	Unconventional myosin-Ie;Unconventional myosin-If	MYO1E;MYO1F
NaN	NaN	NaN	NaN	NaN	NaN			1	1	1	2.4	2.4	2.4	56.3	2.4188	29658000	12045000	17613000	0	NaN	0	NaN	Q13188;Q13188-2	Q13188;Q13188-2	Serine/threonine-protein kinase 3;Serine/threonine-protein kinase 3 36kDa subunit;Serine/threonine-protein kinase 3 20kDa subunit	STK3
NaN	NaN	NaN	NaN	NaN	NaN			2	2	2	13.7	13.7	13.7	23.51	57.942	112950000	84455000	28500000	0	NaN	0	NaN	Q13257;Q13257-2	Q13257;Q13257-2	Mitotic spindle assembly checkpoint protein MAD2A	MAD2L1
NaN	NaN	NaN	NaN	NaN	1.06716			2	2	2	6.5	6.5	6.5	36.501	5.2865	170990000	69565000	101420000	0	NaN	0	0.967157	Q13347	Q13347	Eukaryotic translation initiation factor 3 subunit I	EIF3I
NaN	NaN	NaN	NaN	NaN	NaN			2	2	2	5.8	5.8	5.8	59.918	7.5857	37562000	7643000	29919000	0	NaN	0	NaN	Q13492-4;Q13492-3;Q13492-2;Q13492-5;Q13492;E5RFU0;E5RHK9;E9PKP6;E9PI56;E5RFC6;E5RK51;E5RIJ5;E9PLJ8;E5RGY9;E9PDG8;O60641-3;O60641-4;O60641	Q13492-4;Q13492-3;Q13492-2;Q13492-5;Q13492;E5RFU0;E5RHK9;E9PKP6;E9PI56;E5RFC6;E5RK51;E5RIJ5;E9PLJ8;E5RGY9;E9PDG8;O60641-3;O60641-4;O60641	Phosphatidylinositol-binding clathrin assembly protein;Clathrin coat assembly protein AP180	PICALM;SNAP91
NaN	NaN	NaN	NaN	-0.497914	NaN			4	3	3	46.9	38.9	38.9	12.951	9.3926	170410000	99260000	71153000	0	NaN	0	-0.597914	Q13595-2;Q13595-4;Q13595-3;Q13595	Q13595-2;Q13595-4;Q13595-3;Q13595	Transformer-2 protein homolog alpha	TRA2A
NaN	NaN	NaN	NaN	NaN	NaN			1	1	1	1	1	1	111.43	2.2181	72668000	35033000	37635000	0	NaN	0	NaN	Q13625-2;Q13625;Q13625-3	Q13625-2;Q13625;Q13625-3	Apoptosis-stimulating of p53 protein 2	TP53BP2
NaN	NaN	NaN	NaN	NaN	NaN			176	1	1	75.4	0.7	0.7	282.28	13.219	392080000	152840000	239230000	0	NaN	0	NaN	Q13813-3;A0A0D9SF54	Q13813-3;A0A0D9SF54	Spectrin alpha chain, non-erythrocytic 1	SPTAN1
NaN	NaN	NaN	NaN	NaN	NaN			3	2	2	10.8	8.5	8.5	36.204	2.7553	4629400	0	4629400	0	NaN	0	NaN	Q13829;Q13829-2;J3QSD4;J3QS43	Q13829;Q13829-2	BTB/POZ domain-containing adapter for CUL3-mediated RhoA degradation protein 2	TNFAIP1
NaN	NaN	NaN	NaN	NaN	NaN			1	1	1	8.4	8.4	8.4	26.319	6.8196	29107000	28812000	295310	0	NaN	0	NaN	Q13907;Q13907-2	Q13907;Q13907-2	Isopentenyl-diphosphate Delta-isomerase 1	IDI1
NaN	NaN	NaN	NaN	NaN	NaN			3	3	3	25.4	25.4	25.4	15.945	22.27	278290000	261810000	16477000	0	NaN	0	NaN	Q14019;H3BT58	Q14019;H3BT58	Coactosin-like protein	COTL1
NaN	NaN	NaN	NaN	NaN	NaN			2	2	2	9	9	9	21.896	2.4683	27072000	6633300	20439000	0	NaN	0	NaN	Q14116-2;Q14116	Q14116-2;Q14116	Interleukin-18	IL18
NaN	NaN	NaN	NaN	NaN	NaN			1	1	1	5.2	5.2	5.2	25.396	3.0298	8380400	4356000	4024300	0	NaN	0	NaN	Q14213	Q14213	Interleukin-27 subunit beta	EBI3
NaN	NaN	NaN	NaN	NaN	NaN			1	1	1	3.3	3.3	3.3	92.888	22.453	24811000	24811000	0	0	NaN	0	NaN	Q14566	Q14566	DNA replication licensing factor MCM6	MCM6
NaN	NaN	NaN	NaN	NaN	NaN			10	2	2	3.8	1.2	1.2	306.77	5.1192	28296000	9407100	18889000	0	NaN	0	NaN	Q14643-4;Q14643-3;Q14643-8;Q14643-7;Q14643-5;Q14643-6;Q14643-2;Q14643;B7ZMI3;Q14571-2	Q14643-4;Q14643-3;Q14643-8;Q14643-7;Q14643-5;Q14643-6;Q14643-2;Q14643	Inositol 1,4,5-trisphosphate receptor type 1	ITPR1
NaN	NaN	NaN	NaN	NaN	NaN			2	2	2	1	1	1	208.7	2.4123	43377000	20028000	23348000	0	NaN	0	NaN	Q14690	Q14690	Protein RRP5 homolog	PDCD11
NaN	NaN	NaN	NaN	2.44853	NaN			7	7	7	12	12	12	106.87	41.042	148870000	86256000	62617000	0	NaN	0	2.34853	Q14697;Q14697-2;F5H6X6;E9PKU7	Q14697;Q14697-2;F5H6X6;E9PKU7	Neutral alpha-glucosidase AB	GANAB
NaN	NaN	NaN	NaN	NaN	NaN			5	5	5	7	7	7	90.828	20.341	369070000	10098000	358980000	0	NaN	0	NaN	Q14BN4-2;Q14BN4-3;Q14BN4;H7C3M8;H7BZK0;Q14BN4-4;Q14BN4-6;H7C5G9;H7BZW9;B7Z863;B7Z964;Q14BN4-8;Q14BN4-5;Q14BN4-7;C9JA20;C9JCH4	Q14BN4-2;Q14BN4-3;Q14BN4;H7C3M8;H7BZK0;Q14BN4-4;Q14BN4-6	Sarcolemmal membrane-associated protein	SLMAP
NaN	NaN	NaN	NaN	NaN	NaN			3	3	3	14.8	14.8	14.8	34.833	11.948	110730000	8772700	101950000	0	NaN	0	NaN	Q15006;E5RGJ2;H0YAS9	Q15006	ER membrane protein complex subunit 2	EMC2
NaN	NaN	NaN	NaN	NaN	NaN			1	1	1	4.7	4.7	4.7	41.193	5.6432	10182000	9759600	422610	0	NaN	0	NaN	Q15050	Q15050	Ribosome biogenesis regulatory protein homolog	RRS1
NaN	NaN	NaN	3.36583	NaN	NaN			4	4	4	9.6	9.6	9.6	70.135	8.9707	62238000	6816600	55421000	0	NaN	0	3.26583	Q15067-3;Q15067-2;Q15067;K7ENF1;K7ESC7	Q15067-3;Q15067-2;Q15067	Peroxisomal acyl-coenzyme A oxidase 1	ACOX1
NaN	NaN	NaN	NaN	NaN	NaN			1	1	1	6.8	6.8	6.8	21.995	3.5862	11130000	11130000	0	0	NaN	0	NaN	Q15126	Q15126	Phosphomevalonate kinase	PMVK
NaN	NaN	NaN	NaN	NaN	NaN			446	1	0	77.6	0.4	0	518.47	14.99	333820000	148790000	185030000	0	NaN	0	NaN	Q15149-2;Q15149-7;Q15149-8;Q15149-5;Q15149-6;E9PMV1	Q15149-2;Q15149-7;Q15149-8;Q15149-5;Q15149-6	Plectin	PLEC
NaN	NaN	NaN	NaN	NaN	NaN			2	2	2	20.2	20.2	20.2	19.982	3.0984	21759000	15245000	6514500	0	NaN	0	NaN	Q5SQT6;Q15181	Q5SQT6;Q15181	Inorganic pyrophosphatase	PPA1
NaN	NaN	NaN	NaN	NaN	NaN			2	2	2	13.8	13.8	13.8	16.298	4.8441	82302000	34339000	47962000	0	NaN	0	NaN	Q15388	Q15388	Mitochondrial import receptor subunit TOM20 homolog	TOMM20
NaN	NaN	NaN	NaN	NaN	-0.873027			2	2	2	7.3	7.3	7.3	49.255	5.0222	30248000	22016000	8232200	0	NaN	0	-0.973027	Q15428;K7EMT0	Q15428;K7EMT0	Splicing factor 3A subunit 2	SF3A2
NaN	NaN	NaN	NaN	NaN	NaN			3	3	3	8.1	8.1	8.1	53.942	9.3147	92053000	31720000	60333000	0	NaN	0	NaN	Q155Q3-2;Q155Q3	Q155Q3-2;Q155Q3	Dixin	DIXDC1
NaN	NaN	NaN	NaN	NaN	NaN			2	2	2	4.2	4.2	4.2	48.55	4.8703	128320000	20395000	107920000	0	NaN	0	NaN	Q15645	Q15645	Pachytene checkpoint protein 2 homolog	TRIP13
NaN	NaN	NaN	NaN	2.31191	3.81127			2	2	2	8.5	8.5	8.5	61.562	2.4858	440790000	61716000	379070000	0	NaN	0.801798	2.96159	Q15648-3;Q15648	Q15648-3;Q15648	Mediator of RNA polymerase II transcription subunit 1	MED1
NaN	NaN	NaN	-2.32952	NaN	NaN			3	3	3	14.2	14.2	14.2	29.999	6.6372	30519000	20587000	9932300	0	NaN	0	-2.42952	Q15691	Q15691	Microtubule-associated protein RP/EB family member 1	MAPRE1
NaN	NaN	NaN	NaN	NaN	NaN			28	1	1	18	0.8	0.8	210.58	2.9871	79082000	28707000	50375000	0	NaN	0	NaN	Q15746-6;Q15746;Q15746-5;Q15746-3;Q15746-11;Q15746-7;Q15746-9;D6R9C2;Q15746-10;Q15746-8	Q15746-6;Q15746;Q15746-5;Q15746-3;Q15746-11;Q15746-7;Q15746-9	Myosin light chain kinase, smooth muscle;Myosin light chain kinase, smooth muscle, deglutamylated form	MYLK
NaN	NaN	NaN	NaN	NaN	NaN			2	2	2	10.7	10.7	10.7	34.559	10.43	19265000	13950000	5314900	0	NaN	0	NaN	Q15785	Q15785	Mitochondrial import receptor subunit TOM34	TOMM34
NaN	NaN	NaN	NaN	NaN	NaN			3	3	3	32.4	32.4	32.4	16.363	42.248	104130000	93473000	10653000	0	NaN	0	NaN	Q15819;E5RIF1;D6RG00;H0YBX6;I3L0A0;Q13404-8;Q13404;Q13404-7;Q13404-2;Q13404-1;G3V113;H0YBP9	Q15819;E5RIF1;D6RG00;H0YBX6;I3L0A0;Q13404-8;Q13404;Q13404-7;Q13404-2;Q13404-1	Ubiquitin-conjugating enzyme E2 variant 2;Ubiquitin-conjugating enzyme E2 variant 1	UBE2V2;UBE2V1;TMEM189-UBE2V1
NaN	NaN	NaN	NaN	NaN	NaN			2	2	2	24.7	24.7	24.7	9.0714	7.2089	40704000	38553000	2150800	0	NaN	0	NaN	Q15843	Q15843	NEDD8	NEDD8
NaN	NaN	NaN	NaN	NaN	NaN			2	2	2	6.1	6.1	6.1	42.153	3.3668	114670000	12707000	101960000	0	NaN	0	NaN	Q16186;A0A087WX59	Q16186;A0A087WX59	Proteasomal ubiquitin receptor ADRM1	ADRM1
NaN	NaN	NaN	NaN	3.17876	NaN			3	3	3	8.7	8.7	8.7	46.179	11.116	100890000	9456500	91435000	0	NaN	0	3.07876	Q16537-3;Q16537-2;Q16537;Q15173-2;Q15173	Q16537-3;Q16537-2;Q16537	Serine/threonine-protein phosphatase 2A 56 kDa regulatory subunit epsilon isoform	PPP2R5E
NaN	NaN	NaN	NaN	NaN	NaN			1	1	1	3.7	3.7	3.7	54.529	12.86	6436100	5404000	1032200	0	NaN	0	NaN	Q16658	Q16658	Fascin	FSCN1
NaN	NaN	NaN	NaN	NaN	NaN			3	3	3	16.5	16.5	16.5	33.934	2.6453	42423000	15526000	26897000	0	NaN	0	NaN	Q16831	Q16831	Uridine phosphorylase 1	UPP1
NaN	NaN	NaN	NaN	NaN	NaN			2	2	2	2.1	2.1	2.1	134.62	8.1728	45042000	25915000	19127000	0	NaN	0	NaN	Q27J81-2;Q27J81;A0A0A0MQU1;Q27J81-3	Q27J81-2;Q27J81;A0A0A0MQU1;Q27J81-3	Inverted formin-2	INF2
NaN	NaN	NaN	NaN	NaN	NaN			2	2	2	1.1	1.1	1.1	207.79	2.3811	138320000	55238000	83080000	0	NaN	0	NaN	Q3V6T2-5;Q3V6T2-4;Q3V6T2-2;Q3V6T2-3;Q3V6T2;H0Y7K3;H0Y7U8;H0Y470;H7C2C6	Q3V6T2-5;Q3V6T2-4;Q3V6T2-2;Q3V6T2-3;Q3V6T2;H0Y7K3;H0Y7U8;H0Y470;H7C2C6	Girdin	CCDC88A
NaN	NaN	NaN	NaN	1.87354	NaN			1	1	1	11.9	11.9	11.9	11.354	2.7963	64295000	31301000	32994000	0	NaN	0	1.77354	Q3ZAQ7	Q3ZAQ7	Vacuolar ATPase assembly integral membrane protein VMA21	VMA21
NaN	NaN	NaN	NaN	NaN	NaN			1	1	1	1.2	1.2	1.2	132.89	2.8729	3673800	408480	3265300	0	NaN	0	NaN	Q53EP0	Q53EP0	Fibronectin type III domain-containing protein 3B	FNDC3B
NaN	NaN	NaN	NaN	NaN	NaN			1	1	1	6.9	6.9	6.9	32.805	10.717	39528000	39528000	0	0	NaN	0	NaN	Q53H82	Q53H82	Beta-lactamase-like protein 2	LACTB2
NaN	NaN	NaN	NaN	NaN	NaN			1	1	1	3	3	3	62.027	3.063	0	0	0	0	NaN	0	NaN	Q5F1R6;Q5F1R6-3;Q5F1R6-2	Q5F1R6;Q5F1R6-3;Q5F1R6-2	DnaJ homolog subfamily C member 21	DNAJC21
NaN	NaN	NaN	NaN	-0.520563	NaN			3	2	2	2.6	2.1	2.1	165.53	6.6482	130970000	63891000	67083000	0	NaN	0	-0.620563	Q5JSZ5-5;Q5JSZ5;H0Y412	Q5JSZ5-5;Q5JSZ5	Protein PRRC2B	PRRC2B
NaN	NaN	NaN	NaN	NaN	NaN			1	1	1	1.6	1.6	1.6	99.172	3.6794	21554000	9958900	11595000	0	NaN	0	NaN	Q5JY65;Q9BZJ0-2;Q9BZJ0-3;Q9BZJ0	Q5JY65;Q9BZJ0-2;Q9BZJ0-3;Q9BZJ0	Crooked neck-like protein 1	CRNKL1
NaN	NaN	NaN	NaN	NaN	NaN			2	2	2	8.1	8.1	8.1	38.121	6.4586	21647000	847730	20800000	0	NaN	0	NaN	Q5MNZ6;I3L3A5	Q5MNZ6;I3L3A5	WD repeat domain phosphoinositide-interacting protein 3	WDR45B
NaN	NaN	NaN	NaN	NaN	NaN			1	1	1	9.8	9.8	9.8	30.014	5.8329	9523700	1649400	7874200	0	NaN	0	NaN	Q5QPE8;Q9BQP7	Q5QPE8;Q9BQP7	Mitochondrial genome maintenance exonuclease 1	MGME1
NaN	NaN	NaN	NaN	2.13297	NaN			2	2	2	5.3	5.3	5.3	38.155	3.5515	62464000	14556000	47908000	0	NaN	0	2.03297	Q5T440	Q5T440	Putative transferase CAF17, mitochondrial	IBA57
NaN	NaN	NaN	NaN	NaN	NaN			3	3	3	27.4	27.4	27.4	15.38	6.8498	262100000	15035000	247060000	0	NaN	0	NaN	Q5T5E9;U3KQ50;U3KQG0;Q9BW92-2;Q9BW92	Q5T5E9;U3KQ50;U3KQG0;Q9BW92-2;Q9BW92	Threonine--tRNA ligase, mitochondrial	TARS2
NaN	NaN	NaN	NaN	NaN	NaN			2	2	2	9	9	9	26.319	3.8747	328700000	174590000	154100000	0	NaN	0	NaN	Q5T6H3;Q5T6H2;Q9NQW7-2;Q9NQW7;Q9NQW7-4;Q9NQW7-3;Q5T6H7;E9PFW2;O00462	Q5T6H3;Q5T6H2;Q9NQW7-2;Q9NQW7;Q9NQW7-4;Q9NQW7-3;Q5T6H7;E9PFW2;O00462	Xaa-Pro aminopeptidase 1;Beta-mannosidase	XPNPEP1;MANBA
NaN	NaN	NaN	NaN	NaN	NaN			1	1	1	6.7	6.7	6.7	39.028	4.0426	11447000	7901600	3545400	0	NaN	0	NaN	Q5T6V5	Q5T6V5	UPF0553 protein C9orf64	C9orf64
NaN	NaN	NaN	NaN	-0.353192	NaN			2	2	2	7.9	7.9	7.9	52.29	23.64	41468000	27285000	14182000	0	NaN	0	-0.453192	Q5T7U1;Q9Y5Q8-2;Q9Y5Q8;Q9Y5Q8-3;Q5T7U0;Q5T7U4	Q5T7U1;Q9Y5Q8-2;Q9Y5Q8;Q9Y5Q8-3;Q5T7U0;Q5T7U4	General transcription factor 3C polypeptide 5	GTF3C5
NaN	NaN	NaN	NaN	NaN	NaN			1	1	1	1.9	1.9	1.9	85.45	3.1737	8154200	1175400	6978800	0	NaN	0	NaN	Q5VSL9-2;Q5VSL9	Q5VSL9-2;Q5VSL9	Striatin-interacting protein 1	STRIP1
NaN	NaN	NaN	NaN	NaN	NaN			1	1	1	3.1	3.1	3.1	32.121	2.1909	81529000	46530000	34999000	0	NaN	0	NaN	Q6N063-2	Q6N063-2
NaN	NaN	NaN	NaN	NaN	NaN			1	1	1	20.3	20.3	20.3	8.3796	3.1608	24255000	0	24255000	0	NaN	0	NaN	Q9UDT1;Q6NTF9;Q6NTF9-2	Q9UDT1;Q6NTF9;Q6NTF9-2	Rhomboid domain-containing protein 2	WUGSC:H_RG122E10.2a;RHBDD2
NaN	NaN	NaN	NaN	NaN	NaN			2	2	2	4.3	4.3	4.3	90.631	3.5084	62239000	11125000	51113000	0	NaN	0	NaN	Q6NUQ1	Q6NUQ1	RAD50-interacting protein 1	RINT1
NaN	NaN	NaN	NaN	NaN	0.128689			1	1	1	7.2	7.2	7.2	15.819	3.2007	173000000	86718000	86278000	0	NaN	0	0.0286893	Q6P161	Q6P161	39S ribosomal protein L54, mitochondrial	MRPL54
NaN	NaN	NaN	-0.55313	NaN	-0.135206			3	3	3	4.9	4.9	4.9	109.73	33.813	175150000	81167000	93981000	0	NaN	0.552928	-0.444168	Q6P2E9-2;Q6P2E9	Q6P2E9-2;Q6P2E9	Enhancer of mRNA-decapping protein 4	EDC4
NaN	NaN	NaN	NaN	NaN	NaN			1	1	1	7.4	7.4	7.4	44.255	13.536	28500000	17850000	10649000	0	NaN	0	NaN	Q6P6C2;Q6P6C2-1	Q6P6C2;Q6P6C2-1	RNA demethylase ALKBH5	ALKBH5
NaN	NaN	NaN	NaN	NaN	NaN			2	2	2	10.5	10.5	10.5	45.394	30.996	127190000	48541000	78652000	0	NaN	0	NaN	Q6YN16;Q6YN16-2	Q6YN16;Q6YN16-2	Hydroxysteroid dehydrogenase-like protein 2	HSDL2
NaN	NaN	NaN	NaN	NaN	NaN			2	2	2	5.3	5.3	5.3	43.083	5.6697	75147000	9932600	65214000	0	NaN	0	NaN	Q70UQ0-4;Q70UQ0	Q70UQ0-4;Q70UQ0	Inhibitor of nuclear factor kappa-B kinase-interacting protein	IKBIP
NaN	NaN	NaN	NaN	NaN	NaN			2	2	2	1.7	1.7	1.7	199.07	3.1641	47959000	23476000	24483000	0	NaN	0	NaN	Q7KZ85;Q7KZ85-2;Q7KZ85-3	Q7KZ85;Q7KZ85-2;Q7KZ85-3	Transcription elongation factor SPT6	SUPT6H
NaN	NaN	NaN	NaN	NaN	1.17409			3	3	3	7.4	7.4	7.4	53.262	5.8831	77196000	33969000	43228000	0	NaN	0	1.07409	Q7L3T8	Q7L3T8	Probable proline--tRNA ligase, mitochondrial	PARS2
NaN	NaN	NaN	NaN	NaN	3.12191			3	3	3	8.4	8.4	8.4	70.369	14.272	45214000	3702400	41512000	0	NaN	0	3.02191	Q7L775	Q7L775	EPM2A-interacting protein 1	EPM2AIP1
NaN	NaN	NaN	NaN	NaN	NaN			1	1	1	4.8	4.8	4.8	41.881	5.0956	10798000	0	10798000	0	NaN	0	NaN	Q7LGA3	Q7LGA3	Heparan sulfate 2-O-sulfotransferase 1	HS2ST1
NaN	NaN	NaN	NaN	NaN	NaN			1	1	1	2.9	2.9	2.9	76.193	8.3213	9587800	0	9587800	0	NaN	0	NaN	Q7Z4F1	Q7Z4F1	Low-density lipoprotein receptor-related protein 10	LRP10
NaN	NaN	NaN	NaN	NaN	NaN			1	1	1	14.1	14.1	14.1	20.772	13.048	80002000	11831000	68170000	0	NaN	0	NaN	Q7Z4R8	Q7Z4R8	UPF0669 protein C6orf120	C6orf120
NaN	NaN	NaN	NaN	NaN	NaN			2	2	2	11.1	11.1	11.1	29.282	3.0783	95328000	34670000	60658000	0	NaN	0	NaN	Q7Z7H8;Q7Z7H8-2	Q7Z7H8;Q7Z7H8-2	39S ribosomal protein L10, mitochondrial	MRPL10
NaN	NaN	NaN	NaN	NaN	NaN			2	2	2	7.9	7.9	7.9	29.469	3.7952	30236000	6404600	23832000	0	NaN	0	NaN	Q86T03;Q86T03-2;G3V5T5;H0YJ90	Q86T03;Q86T03-2;G3V5T5;H0YJ90	Type 1 phosphatidylinositol 4,5-bisphosphate 4-phosphatase	TMEM55B
NaN	NaN	NaN	NaN	NaN	NaN			2	2	2	5.7	5.7	5.7	52.07	3.1017	14469000	0	14469000	0	NaN	0	NaN	Q86UL3;E5RIA1;E5RHA6	Q86UL3;E5RIA1;E5RHA6	Glycerol-3-phosphate acyltransferase 4	AGPAT6
NaN	NaN	NaN	NaN	NaN	NaN			2	2	2	5.3	5.3	5.3	45.143	4.6669	186700000	69501000	117200000	0	NaN	0	NaN	Q86VY4	Q86VY4	Testis-specific Y-encoded-like protein 5	TSPYL5
NaN	NaN	NaN	NaN	NaN	NaN			3	3	3	5.6	5.6	5.6	63.459	6.2616	13057000	0	13057000	0	NaN	0	NaN	Q86X55-1;Q86X55;Q86X55-2;K7EK20;K7EPK1;K7EQA8	Q86X55-1;Q86X55;Q86X55-2	Histone-arginine methyltransferase CARM1	CARM1
NaN	NaN	NaN	NaN	NaN	NaN			1	1	1	4.3	4.3	4.3	37.072	3.7907	28864000	15256000	13608000	0	NaN	0	NaN	Q8IUH3-2;Q8IUH3-3;Q8IUH3	Q8IUH3-2;Q8IUH3-3;Q8IUH3	RNA-binding protein 45	RBM45
NaN	NaN	NaN	NaN	NaN	NaN			1	1	1	2.4	2.4	2.4	605.64	2.9135	103580000	43860000	59721000	0	NaN	0	NaN	Q8IVF2-3;Q8IVF2	Q8IVF2-3;Q8IVF2	Protein AHNAK2	AHNAK2
NaN	NaN	NaN	NaN	NaN	NaN			4	4	4	18.7	18.7	18.7	41.211	18.525	105020000	437220	104580000	0	NaN	0	NaN	Q8IXU6;E9PJD1;Q8IXU6-2;Q8IXU6-3;E9PKZ2;E9PRY2	Q8IXU6;E9PJD1;Q8IXU6-2;Q8IXU6-3	Solute carrier family 35 member F2	SLC35F2
NaN	NaN	NaN	NaN	NaN	NaN			1	1	1	3.2	3.2	3.2	35.858	2.7613	4327800	1374500	2953200	0	NaN	0	NaN	Q9NXX6-2;Q8N140;Q9NXX6	Q9NXX6-2;Q8N140;Q9NXX6	Non-structural maintenance of chromosomes element 4 homolog A;EP300-interacting inhibitor of differentiation 3	NSMCE4A;EID3
NaN	NaN	NaN	NaN	NaN	NaN			2	2	2	19.7	19.7	19.7	15.396	10.049	37122000	6354600	30767000	0	NaN	0	NaN	Q8N490-2	Q8N490-2
NaN	NaN	NaN	NaN	NaN	NaN			1	1	1	12.4	12.4	12.4	21.315	21.771	21968000	12757000	9211500	0	NaN	0	NaN	Q8N4T4-3;Q8N4T4-2;Q8N4T4-4;Q8N4T4	Q8N4T4-3;Q8N4T4-2;Q8N4T4-4;Q8N4T4	Rho guanine nucleotide exchange factor 39	ARHGEF39
NaN	NaN	NaN	NaN	NaN	NaN			1	1	1	18.3	18.3	18.3	14.686	9.9162	11252000	0	11252000	0	NaN	0	NaN	Q8N4V1;Q8N4V1-2	Q8N4V1;Q8N4V1-2	Membrane magnesium transporter 1	MMGT1
NaN	NaN	NaN	NaN	NaN	NaN			2	2	2	11.7	11.7	11.7	22.882	2.7413	32161000	13880000	18280000	0	NaN	0	NaN	Q8N5W9	Q8N5W9	Filamin-interacting protein FAM101B	FAM101B
NaN	NaN	NaN	NaN	NaN	NaN			1	1	1	12.5	12.5	12.5	14.678	2.9249	23764000	746230	23018000	0	NaN	0	NaN	Q8N6L1;Q8N6L1-2	Q8N6L1;Q8N6L1-2	Keratinocyte-associated protein 2	KRTCAP2
NaN	NaN	NaN	NaN	NaN	NaN			1	1	1	12.9	12.9	12.9	14.652	3.6623	29548000	0	29548000	0	NaN	0	NaN	Q8N8J7	Q8N8J7	Uncharacterized protein C4orf32	C4orf32
NaN	NaN	NaN	NaN	NaN	NaN			1	1	1	10.2	10.2	10.2	18.054	3.5262	0	0	0	0	NaN	0	NaN	Q8NBM4-4;Q8NBM4-3;Q8NBM4-2;Q8NBM4	Q8NBM4-4;Q8NBM4-3;Q8NBM4-2;Q8NBM4	Ubiquitin-associated domain-containing protein 2	UBAC2
NaN	NaN	NaN	NaN	NaN	NaN			1	1	1	7.8	7.8	7.8	16.884	2.836	29495000	3307400	26187000	0	NaN	0	NaN	Q8NCS4	Q8NCS4	Uncharacterized protein ZMYM6NB	ZMYM6NB
NaN	NaN	NaN	NaN	NaN	NaN			3	3	3	7.3	7.3	7.3	46.411	24.787	56623000	53173000	3449500	0	NaN	0	NaN	Q8ND56-3;Q8ND56-2;Q8ND56;I3L4Q1;K7EMZ9;A0A0G2JQ95;A0A096LP11	Q8ND56-3;Q8ND56-2;Q8ND56;I3L4Q1;K7EMZ9	Protein LSM14 homolog A	LSM14A
NaN	NaN	NaN	NaN	NaN	NaN			2	2	2	9.1	9.1	9.1	33.245	4.3933	11366000	8162300	3204000	0	NaN	0	NaN	Q8ND76-3;Q8ND76-2;Q8ND76;H7C0P7;Q8N7R7-3;Q8N7R7-2;Q8N7R7;Q5T2Q4	Q8ND76-3;Q8ND76-2;Q8ND76;H7C0P7;Q8N7R7-3;Q8N7R7-2;Q8N7R7;Q5T2Q4	Cyclin-Y;Cyclin-Y-like protein 1;Cyclin-Y-like protein 2	CCNY;CCNYL1;CCNYL2
NaN	NaN	NaN	NaN	0.298189	1.60426			4	4	4	11.4	11.4	11.4	48.633	12.164	584680000	138760000	445920000	0	NaN	0.380276	0.851225	Q8NEF9	Q8NEF9	Serum response factor-binding protein 1	SRFBP1
NaN	NaN	NaN	NaN	NaN	NaN			1	1	1	4.9	4.9	4.9	36.707	3.4285	6668700	6668700	0	0	NaN	0	NaN	Q8NFH4	Q8NFH4	Nucleoporin Nup37	NUP37
NaN	NaN	NaN	NaN	NaN	NaN			1	1	1	8.1	8.1	8.1	33.863	6.0604	6026400	6026400	0	0	NaN	0	NaN	Q8NFV4-4;Q8NFV4	Q8NFV4-4;Q8NFV4	Alpha/beta hydrolase domain-containing protein 11	ABHD11
NaN	NaN	NaN	NaN	NaN	NaN			2	2	2	4.2	4.2	4.2	64.521	2.7425	111820000	825310	110990000	0	NaN	0	NaN	Q8NHH9-5;Q8NHH9-4;Q8NHH9-2;Q8NHH9;C9JQQ5;C9JC25;H7C3A2;B5MCN0;Q8NHH9-3	Q8NHH9-5;Q8NHH9-4;Q8NHH9-2;Q8NHH9;C9JQQ5;C9JC25;H7C3A2;B5MCN0;Q8NHH9-3	Atlastin-2	ATL2
NaN	NaN	NaN	NaN	NaN	NaN			3	3	3	5.6	5.6	5.6	65.471	17.961	537380000	526740000	10641000	0	NaN	0	NaN	Q8NHP8;Q8NHP8-2	Q8NHP8;Q8NHP8-2	Putative phospholipase B-like 2;Putative phospholipase B-like 2 32 kDa form;Putative phospholipase B-like 2 45 kDa form	PLBD2
NaN	NaN	NaN	NaN	NaN	NaN			1	1	1	1.8	1.8	1.8	102.28	9.8117	20596000	9368600	11227000	0	NaN	0	NaN	Q8NI77	Q8NI77	Kinesin-like protein KIF18A	KIF18A
NaN	NaN	NaN	NaN	NaN	NaN			1	1	1	8.9	8.9	8.9	25.431	7.9204	19875000	0	19875000	0	NaN	0	NaN	Q8TAA5	Q8TAA5	GrpE protein homolog 2, mitochondrial	GRPEL2
NaN	NaN	NaN	NaN	NaN	NaN			1	1	1	7.3	7.3	7.3	27.813	24.651	10994000	10994000	0	0	NaN	0	NaN	Q8TBE9	Q8TBE9	N-acylneuraminate-9-phosphatase	NANP
NaN	NaN	NaN	NaN	NaN	NaN			2	2	2	6.6	6.6	6.6	52.441	3.6622	14506000	13434000	1071300	0	NaN	0	NaN	Q8TDL5	Q8TDL5	BPI fold-containing family B member 1	BPIFB1
NaN	NaN	NaN	NaN	NaN	NaN			3	3	3	2.8	2.8	2.8	168.59	9.2352	37880000	17787000	20092000	0	NaN	0	NaN	Q8TEQ6	Q8TEQ6	Gem-associated protein 5	GEMIN5
NaN	NaN	NaN	NaN	NaN	NaN			1	1	1	7.1	7.1	7.1	20.874	4.7624	4747500	4747500	0	0	NaN	0	NaN	Q8WUX2	Q8WUX2	Putative glutathione-specific gamma-glutamylcyclotransferase 2	CHAC2
NaN	NaN	NaN	NaN	NaN	NaN			2	2	2	18.5	18.5	18.5	17.676	22.141	65075000	59177000	5898200	0	NaN	0	NaN	Q8WVJ2;E5RFP0	Q8WVJ2;E5RFP0	NudC domain-containing protein 2	NUDCD2
NaN	NaN	NaN	NaN	NaN	NaN			1	1	1	9.7	9.7	9.7	23.128	23.518	72716000	72716000	0	0	NaN	0	NaN	Q8WW59	Q8WW59	SPRY domain-containing protein 4	SPRYD4
NaN	NaN	NaN	NaN	NaN	NaN			4	4	4	7.8	7.8	7.8	73.011	7.7782	147340000	50020000	97316000	0	NaN	0	NaN	Q8WWI5-3;Q8WWI5-2;Q8WWI5	Q8WWI5-3;Q8WWI5-2;Q8WWI5	Choline transporter-like protein 1	SLC44A1
NaN	NaN	NaN	NaN	NaN	NaN			1	1	1	35.1	35.1	35.1	6.2107	2.8506	0	0	0	0	NaN	0	NaN	Q8WXC6	Q8WXC6	Myeloma-overexpressed gene 2 protein	MYEOV2
NaN	NaN	NaN	NaN	NaN	NaN			2	2	2	9.6	9.6	9.6	26.973	4.8855	94133000	0	94133000	0	NaN	0	NaN	Q92506	Q92506	Estradiol 17-beta-dehydrogenase 8	HSD17B8
NaN	NaN	NaN	NaN	NaN	NaN			1	1	1	0.6	0.6	0.6	206.01	2.8254	11711000	1197700	10513000	0	NaN	0	NaN	Q92538-3;Q92538-2;Q92538	Q92538-3;Q92538-2;Q92538	Golgi-specific brefeldin A-resistance guanine nucleotide exchange factor 1	GBF1
NaN	NaN	NaN	NaN	NaN	NaN			5	5	5	3.6	3.6	3.6	227.92	19.393	48684000	4647000	44037000	0	NaN	0	NaN	Q92621;U3KPX2	Q92621	Nuclear pore complex protein Nup205	NUP205
NaN	NaN	NaN	NaN	NaN	NaN			2	2	2	8	8	8	52.186	8.6242	61609000	21460000	40149000	0	NaN	0	NaN	Q92759;A0A0G2JHJ2	Q92759;A0A0G2JHJ2	General transcription factor IIH subunit 4	GTF2H4
NaN	NaN	NaN	NaN	NaN	NaN			2	2	2	6.6	6.6	6.6	51.998	3.7939	302320000	170870000	131450000	0	NaN	0	NaN	Q92769-3;Q92769;Q5TEE2;Q13547	Q92769-3;Q92769;Q5TEE2;Q13547	Histone deacetylase 2;Histone deacetylase 1	HDAC2;HDAC1
NaN	NaN	NaN	NaN	NaN	NaN			1	1	1	0.6	0.6	0.6	290.46	2.9476	4242800	4242800	0	0	NaN	0	NaN	Q93008-1;Q93008	Q93008-1;Q93008	Probable ubiquitin carboxyl-terminal hydrolase FAF-X	USP9X
NaN	NaN	NaN	NaN	NaN	NaN			1	1	1	5.6	5.6	5.6	22.047	4.0036	95236000	9455800	85780000	0	NaN	0	NaN	Q969E2-2;Q969E2	Q969E2-2;Q969E2	Secretory carrier-associated membrane protein 4	SCAMP4
NaN	NaN	NaN	NaN	NaN	NaN			2	2	2	8.2	8.2	8.2	27.989	5.8106	460680000	21005000	439670000	0	NaN	0	NaN	Q969M3;Q969M3-3;E5RGR9;E5RHH4;Q969M3-2	Q969M3;Q969M3-3;E5RGR9;E5RHH4;Q969M3-2	Protein YIPF5;Protein YIPF	YIPF5
NaN	NaN	NaN	NaN	NaN	NaN			2	2	2	11.6	11.6	11.6	22.16	4.1141	15821000	1424500	14397000	0	NaN	0	NaN	Q969X5-2;Q969X5	Q969X5-2;Q969X5	Endoplasmic reticulum-Golgi intermediate compartment protein 1	ERGIC1
NaN	NaN	NaN	NaN	NaN	NaN			3	3	3	6	6	6	70.737	5.1791	13166000	1282900	11883000	0	NaN	0	NaN	Q969Z0;Q969Z0-2;H7C4R5;C9IZN7	Q969Z0;Q969Z0-2	Protein TBRG4	TBRG4
NaN	NaN	NaN	NaN	NaN	NaN			6	6	6	14.1	14.1	14.1	55.873	11.801	181740000	8770500	172970000	0	NaN	0	NaN	Q96A33;Q96A33-2;A0A087WYW6	Q96A33;Q96A33-2	Coiled-coil domain-containing protein 47	CCDC47
NaN	NaN	NaN	NaN	NaN	NaN			4	1	0	13	3.4	0	46.598	2.7489	0	0	0	0	NaN	0	NaN	Q96AK3;A0A087WX48	Q96AK3	DNA dC->dU-editing enzyme APOBEC-3D	APOBEC3D
NaN	NaN	NaN	NaN	NaN	NaN			1	1	1	2.4	2.4	2.4	72.92	3.6937	14355000	2268000	12087000	0	NaN	0	NaN	Q96AQ6-3;Q96AQ6-2;Q96AQ6	Q96AQ6-3;Q96AQ6-2;Q96AQ6	Pre-B-cell leukemia transcription factor-interacting protein 1	PBXIP1
NaN	NaN	NaN	-2.66658	NaN	NaN			2	2	2	12	12	12	37.765	17.535	52028000	49634000	2393900	0	NaN	0	-2.76658	Q96C23;B8ZZ75;H7C320;H7C1B5	Q96C23;B8ZZ75;H7C320;H7C1B5	Aldose 1-epimerase	GALM
NaN	NaN	NaN	NaN	NaN	NaN			1	1	1	10.7	10.7	10.7	13.238	5.3902	27605000	3675200	23930000	0	NaN	0	NaN	Q96D05;Q96D05-2	Q96D05;Q96D05-2	Uncharacterized protein C10orf35	C10orf35
NaN	NaN	NaN	NaN	NaN	NaN			2	2	2	13.9	13.9	13.9	28.048	29.429	52229000	52229000	0	0	NaN	0	NaN	Q96DG6	Q96DG6	Carboxymethylenebutenolidase homolog	CMBL
NaN	NaN	NaN	NaN	NaN	-0.502321			19	2	2	40.3	4.1	4.1	42.141	3.1179	97660000	60647000	37013000	0	NaN	0	-0.602321	Q96E39	Q96E39	RNA binding motif protein, X-linked-like-1	RBMXL1
NaN	NaN	NaN	1.54972	NaN	NaN			4	4	4	14.2	14.2	14.2	39.648	14.729	196900000	40073000	156830000	0	NaN	0	1.44972	Q96EE3;Q96EE3-1;K7ELV2;K7ENI5	Q96EE3;Q96EE3-1;K7ELV2	Nucleoporin SEH1	SEH1L
NaN	NaN	NaN	NaN	NaN	NaN			1	1	1	10.7	10.7	10.7	11.801	2.7492	0	0	0	0	NaN	0	NaN	Q96FQ6	Q96FQ6	Protein S100-A16	S100A16
NaN	NaN	NaN	NaN	NaN	NaN			1	1	1	4	4	4	54.854	19.624	55852000	31661000	24191000	0	NaN	0	NaN	Q96GA3	Q96GA3	Protein LTV1 homolog	LTV1
NaN	NaN	NaN	NaN	NaN	NaN			1	1	1	32.4	32.4	32.4	10.778	16.954	15565000	15565000	0	0	NaN	0	NaN	Q96H79-2;Q96H79	Q96H79-2;Q96H79	Zinc finger CCCH-type antiviral protein 1-like	ZC3HAV1L
NaN	NaN	NaN	NaN	1.28924	NaN			5	2	2	2.7	1.3	1.3	229.56	4.5148	76640000	24701000	51938000	0	NaN	0	1.18924	Q96HP0;K7ESB7	Q96HP0;K7ESB7	Dedicator of cytokinesis protein 6	DOCK6
NaN	NaN	NaN	NaN	NaN	NaN			2	2	2	8	8	8	41.894	13.017	45328000	23788000	21540000	0	NaN	0	NaN	Q96HR8-2;Q96HR8	Q96HR8-2;Q96HR8	H/ACA ribonucleoprotein complex non-core subunit NAF1	NAF1
NaN	NaN	NaN	NaN	NaN	NaN			1	1	1	2.4	2.4	2.4	61.64	6.1673	342490000	178170000	164320000	0	NaN	0	NaN	Q96I24	Q96I24	Far upstream element-binding protein 3	FUBP3
NaN	NaN	NaN	NaN	NaN	NaN			1	1	1	8.4	8.4	8.4	25.961	6.3539	6865900	0	6865900	0	NaN	0	NaN	Q96LL9	Q96LL9	DnaJ homolog subfamily C member 30	DNAJC30
NaN	NaN	NaN	NaN	NaN	NaN			2	2	2	11.5	11.5	11.5	20.625	2.5332	9506000	1340200	8165800	0	NaN	0	NaN	Q96LW7-2;Q96LW7	Q96LW7-2;Q96LW7	Bcl10-interacting CARD protein	C9orf89
NaN	NaN	NaN	NaN	NaN	NaN			1	1	1	1.7	1.7	1.7	115.96	9.2075	9666200	0	9666200	0	NaN	0	NaN	Q96P70	Q96P70	Importin-9	IPO9
NaN	NaN	NaN	NaN	NaN	NaN			1	1	1	0.7	0.7	0.7	221.67	2.2028	81024000	28678000	52346000	0	NaN	0	NaN	Q96PE2	Q96PE2	Rho guanine nucleotide exchange factor 17	ARHGEF17
NaN	NaN	NaN	NaN	1.2867	1.06219			3	3	3	8.7	8.7	8.7	56.025	34.657	687000000	281140000	405860000	0	NaN	1.17867	1.07445	Q96QD8;Q96QD8-2;F8VUY8	Q96QD8;Q96QD8-2	Sodium-coupled neutral amino acid transporter 2	SLC38A2
NaN	NaN	NaN	NaN	NaN	NaN			2	2	2	0.4	0.4	0.4	600.09	2.3424	363580000	178110000	185460000	0	NaN	0	NaN	Q96RW7-2;Q96RW7	Q96RW7-2;Q96RW7	Hemicentin-1	HMCN1
NaN	NaN	NaN	NaN	NaN	NaN			1	1	1	3.5	3.5	3.5	47.436	2.9306	41337000	25615000	15722000	0	NaN	0	NaN	Q96S66-3;Q96S66-2;Q96S66	Q96S66-3;Q96S66-2;Q96S66	Chloride channel CLIC-like protein 1	CLCC1
NaN	NaN	NaN	NaN	NaN	NaN			1	1	1	1.8	1.8	1.8	62.528	2.356	11561000	1335300	10226000	0	NaN	0	NaN	Q96SU4-5;Q96SU4-4;Q96SU4-3;Q96SU4-7;Q96SU4-2;Q96SU4;Q96SU4-6	Q96SU4-5;Q96SU4-4;Q96SU4-3;Q96SU4-7;Q96SU4-2;Q96SU4;Q96SU4-6	Oxysterol-binding protein-related protein 9	OSBPL9
NaN	NaN	NaN	NaN	NaN	0.90458			2	2	2	5.1	5.1	5.1	75.981	6.6071	42734000	18166000	24568000	0	NaN	0	0.80458	Q96TA2-3;Q96TA2-2;Q96TA2;Q96I63	Q96TA2-3;Q96TA2-2;Q96TA2;Q96I63	ATP-dependent zinc metalloprotease YME1L1	YME1L1
NaN	NaN	NaN	NaN	NaN	NaN			4	4	4	17.3	17.3	17.3	29.965	7.6969	47963000	3019700	44943000	0	NaN	0	NaN	Q99436;Q5TBG5;Q99436-2	Q99436;Q5TBG5;Q99436-2	Proteasome subunit beta type-7;Proteasome subunit beta type	PSMB7
NaN	NaN	NaN	NaN	NaN	NaN			5	5	5	31.2	31.2	31.2	19.891	192.12	971130000	829900000	141230000	0	NaN	0	NaN	Q99497;K7EN27;K7ELW0	Q99497;K7EN27;K7ELW0	Protein deglycase DJ-1	PARK7
NaN	NaN	NaN	NaN	NaN	NaN			1	1	1	6.2	6.2	6.2	42.007	3.2097	1770600	1770600	0	0	NaN	0	NaN	Q99538-3;Q99538-2;Q99538	Q99538-3;Q99538-2;Q99538	Legumain	LGMN
NaN	NaN	NaN	NaN	NaN	NaN			3	3	3	7.7	7.7	7.7	75.775	10.977	143410000	4057200	139360000	0	NaN	0	NaN	Q99805	Q99805	Transmembrane 9 superfamily member 2	TM9SF2
NaN	NaN	NaN	NaN	NaN	NaN			2	2	2	9.4	9.4	9.4	19.881	8.6446	44884000	1596700	43287000	0	NaN	0	NaN	Q99942	Q99942	E3 ubiquitin-protein ligase RNF5	RNF5
NaN	NaN	NaN	NaN	NaN	NaN			2	2	2	2.6	2.6	2.6	114.33	6.3458	25584000	5139600	20445000	0	NaN	0	NaN	Q9BPX3	Q9BPX3	Condensin complex subunit 3	NCAPG
NaN	NaN	NaN	NaN	NaN	NaN			1	1	1	7.2	7.2	7.2	25.13	2.7713	4041100	0	4041100	0	NaN	0	NaN	Q9BQD7	Q9BQD7	Protein FAM173A	FAM173A
NaN	NaN	NaN	NaN	NaN	2.60436			2	2	2	8.4	8.4	8.4	39.416	5.1104	234980000	51431000	183540000	0	NaN	0	2.50436	Q9BRP1	Q9BRP1	Programmed cell death protein 2-like	PDCD2L
NaN	NaN	NaN	NaN	NaN	1.25393			2	2	2	5.7	5.7	5.7	46.971	4.3688	62199000	22297000	39902000	0	NaN	0	1.15393	Q9BS26	Q9BS26	Endoplasmic reticulum resident protein 44	ERP44
NaN	NaN	NaN	NaN	NaN	NaN			1	1	1	3.1	3.1	3.1	83.192	3.3544	5208000	548010	4660000	0	NaN	0	NaN	Q9BSW2-2	Q9BSW2-2
NaN	NaN	NaN	NaN	NaN	NaN			4	4	4	12.1	12.1	12.1	52.518	4.2408	40018000	0	40018000	0	NaN	0	NaN	Q9BT22;Q9BT22-2;K7EID2;K7EPU3;A0A087WZJ8;Q6GMV1	Q9BT22;Q9BT22-2;K7EID2	Chitobiosyldiphosphodolichol beta-mannosyltransferase	ALG1
NaN	NaN	NaN	NaN	NaN	NaN			1	1	1	11.1	11.1	11.1	16.915	6.707	7275200	1051200	6224000	0	NaN	0	NaN	Q9BT67-2;Q9BT67	Q9BT67-2;Q9BT67	NEDD4 family-interacting protein 1	NDFIP1
NaN	NaN	NaN	3.21571	NaN	2.40904			6	6	6	23.5	23.5	23.5	44.875	39.876	461150000	57273000	403880000	0	NaN	1.02697	2.71237	Q9BTV4	Q9BTV4	Transmembrane protein 43	TMEM43
NaN	NaN	NaN	NaN	NaN	4.07056			2	2	2	7.7	7.7	7.7	28.969	5.8671	30877000	3866000	27011000	0	NaN	0	3.97056	Q9BUB7;D4PHA6;Q9BUB7-3;Q9BUB7-2	Q9BUB7;D4PHA6;Q9BUB7-3;Q9BUB7-2	Transmembrane protein 70, mitochondrial	TMEM70
NaN	NaN	NaN	NaN	NaN	NaN			3	3	3	25.5	25.5	25.5	15.896	18.737	45540000	24536000	21004000	0	NaN	0	NaN	Q9BV86-2;Q9BV86;S4R344;S4R3J7	Q9BV86-2;Q9BV86	N-terminal Xaa-Pro-Lys N-methyltransferase 1;N-terminal Xaa-Pro-Lys N-methyltransferase 1, N-terminally processed	NTMT1
NaN	NaN	NaN	NaN	NaN	NaN			2	2	2	9.1	9.1	9.1	26.21	4.5688	30107000	433900	29673000	0	NaN	0	NaN	Q9BVC6	Q9BVC6	Transmembrane protein 109	TMEM109
NaN	NaN	NaN	NaN	NaN	NaN			1	1	1	1.5	1.5	1.5	82.004	3.1246	63120000	37045000	26076000	0	NaN	0	NaN	Q9BVJ6-3;Q9BVJ6	Q9BVJ6-3;Q9BVJ6	U3 small nucleolar RNA-associated protein 14 homolog A	UTP14A
NaN	NaN	NaN	NaN	NaN	NaN			2	2	2	6.1	6.1	6.1	42.351	4.5489	17407000	12760000	4646600	0	NaN	0	NaN	Q9BXS6-7;Q9BXS6-3;Q9BXS6-5;Q9BXS6-2;Q9BXS6;H0YMD2;Q9BXS6-4;Q9BXS6-6	Q9BXS6-7;Q9BXS6-3;Q9BXS6-5;Q9BXS6-2;Q9BXS6;H0YMD2;Q9BXS6-4;Q9BXS6-6	Nucleolar and spindle-associated protein 1	NUSAP1
NaN	NaN	NaN	NaN	NaN	NaN			2	2	2	8	8	8	35.618	5.8615	6050800	6050800	0	0	NaN	0	NaN	Q9BYB4;C9JPQ6;Q9BYB4-2	Q9BYB4;C9JPQ6;Q9BYB4-2	Guanine nucleotide-binding protein subunit beta-like protein 1	GNB1L
NaN	NaN	NaN	NaN	NaN	NaN			2	2	2	12.8	12.8	12.8	17.442	2.4091	0	0	0	0	NaN	0	NaN	Q9BYC9;I3L2X1;Q9BYC9-2	Q9BYC9;I3L2X1;Q9BYC9-2	39S ribosomal protein L20, mitochondrial	MRPL20
NaN	NaN	NaN	NaN	NaN	NaN			3	3	3	1.6	1.6	1.6	294.65	5.5033	38198000	20062000	18136000	0	NaN	0	NaN	Q9BYK8;Q9BYK8-2;Q9BYK8-4	Q9BYK8;Q9BYK8-2;Q9BYK8-4	Helicase with zinc finger domain 2	HELZ2
NaN	NaN	NaN	NaN	0.564134	NaN			2	2	2	2	2	2	136.68	5.2357	41381000	15575000	25806000	0	NaN	0	0.464134	Q9BZH6	Q9BZH6	WD repeat-containing protein 11	WDR11
NaN	NaN	NaN	NaN	NaN	NaN			1	1	1	3.7	3.7	3.7	27.949	2.4421	68493000	37540000	30952000	0	NaN	0	NaN	Q9BZM4	Q9BZM4	NKG2D ligand 3	ULBP3
NaN	NaN	NaN	NaN	NaN	NaN			1	1	1	4	4	4	38.486	2.772	0	0	0	0	NaN	0	NaN	Q9C0H2-3;Q9C0H2-2;Q9C0H2;Q9C0H2-4	Q9C0H2-3;Q9C0H2-2;Q9C0H2;Q9C0H2-4	Protein tweety homolog 3	TTYH3
NaN	NaN	NaN	NaN	NaN	NaN			2	2	2	1.6	1.6	1.6	145.89	2.8414	35590000	21464000	14127000	0	NaN	0	NaN	Q9C0J8;C9J8B4;Q9C0J8-3	Q9C0J8;C9J8B4;Q9C0J8-3	pre-mRNA 3 end processing protein WDR33	WDR33
NaN	NaN	NaN	NaN	NaN	NaN			1	1	1	10	10	10	24.121	8.4166	17486000	17486000	0	0	NaN	0	NaN	Q9GZP4-2;Q9GZP4	Q9GZP4-2;Q9GZP4	PITH domain-containing protein 1	PITHD1
NaN	NaN	NaN	NaN	NaN	NaN			3	3	3	20.5	20.5	20.5	27.567	20.278	293410000	14893000	278510000	0	NaN	0	NaN	Q9GZP9;I3L1S8;I3L1T3;I3L0R8;I3L3R8;I3L4W7;K7EQE8;I3L1W3;Q96Q80-5;Q96Q80-4;Q96Q80-3;Q96Q80;Q96Q80-2	Q9GZP9;I3L1S8;I3L1T3;I3L0R8	Derlin-2	DERL2
NaN	NaN	NaN	NaN	NaN	NaN			1	1	1	23.7	23.7	23.7	12.442	9.7865	5300400	5300400	0	0	NaN	0	NaN	V9GYE8;Q9GZT4	V9GYE8;Q9GZT4	Serine racemase	SRR
NaN	NaN	NaN	NaN	NaN	NaN			2	2	2	12.3	12.3	12.3	16.694	2.3288	14384000	505370	13879000	0	NaN	0	NaN	Q9GZY4;C9JA07	Q9GZY4;C9JA07	Cytochrome c oxidase assembly factor 1 homolog	COA1
NaN	NaN	NaN	NaN	NaN	NaN			2	2	2	2.5	2.5	2.5	96.766	3.4913	21652000	10143000	11509000	0	NaN	0	NaN	Q9H1B5	Q9H1B5	Xylosyltransferase 2	XYLT2
NaN	NaN	NaN	NaN	3.25648	NaN			3	3	3	10	10	10	42.19	6.0205	218340000	45163000	173180000	0	NaN	0	3.15648	Q9H300;F8WCQ4;C9JNP8;Q9H300-2;H7C0U0	Q9H300;F8WCQ4;C9JNP8;Q9H300-2	Presenilins-associated rhomboid-like protein, mitochondrial;P-beta	PARL
NaN	NaN	NaN	0.287472	NaN	NaN			3	3	3	18.3	18.3	18.3	24.95	17.778	425160000	254640000	170520000	0	NaN	0	0.187472	Q9H444	Q9H444	Charged multivesicular body protein 4b	CHMP4B
NaN	NaN	NaN	NaN	NaN	NaN			1	1	1	3.3	3.3	3.3	48.687	2.7994	29119000	11889000	17230000	0	NaN	0	NaN	Q9H6W3-2;Q9H6W3	Q9H6W3-2;Q9H6W3	Bifunctional lysine-specific demethylase and histidyl-hydroxylase NO66	NO66
NaN	NaN	NaN	NaN	-0.864465	-0.539184			2	2	2	4.8	4.8	4.8	44.402	5.971	192130000	115650000	76482000	0	NaN	0.894823	-0.801825	Q9H814	Q9H814	Phosphorylated adapter RNA export protein	PHAX
NaN	NaN	NaN	-2.44191	NaN	NaN			4	4	4	16.5	16.5	16.5	34.412	14.662	69749000	63700000	6049000	0	NaN	0	-2.54191	Q9HA64;I3L3W5;I3L139;I3L2G3;I3L378	Q9HA64;I3L3W5;I3L139;I3L2G3	Ketosamine-3-kinase	FN3KRP
NaN	NaN	NaN	NaN	NaN	NaN			2	2	2	1.7	1.7	1.7	136.31	3.0908	9006500	373140	8633400	0	NaN	0	NaN	Q9HAV4;H0Y9I3	Q9HAV4;H0Y9I3	Exportin-5	XPO5
NaN	NaN	NaN	NaN	4.55287	3.88313			5	5	5	30.9	30.9	30.9	24.279	19.514	696810000	61054000	635760000	0	NaN	1.28689	4.118	Q9HAV7	Q9HAV7	GrpE protein homolog 1, mitochondrial	GRPEL1
NaN	NaN	NaN	NaN	NaN	NaN			1	1	1	27	27	27	7.2634	10.488	27398000	6294600	21103000	0	NaN	0	NaN	Q9HB66	Q9HB66		MKKS
NaN	NaN	NaN	NaN	NaN	2.57737			3	3	3	16.2	16.2	16.2	21.228	4.483	172420000	41492000	130930000	0	NaN	0	2.47737	Q9HB71-3;Q9HB71	Q9HB71-3;Q9HB71	Calcyclin-binding protein	CACYBP
NaN	NaN	NaN	NaN	NaN	NaN			1	1	1	11.4	11.4	11.4	17.25	3.7903	10712000	1371100	9340900	0	NaN	0	NaN	V9GY93;Q9HC07-2;Q9HC07	V9GY93;Q9HC07-2;Q9HC07	Transmembrane protein 165	TMEM165
NaN	NaN	NaN	NaN	NaN	NaN			3	3	3	9.9	9.9	9.9	36.426	5.3488	56360000	17748000	38612000	0	NaN	0	NaN	Q9NPF4;G3V445	Q9NPF4	Probable tRNA N6-adenosine threonylcarbamoyltransferase	OSGEP
NaN	NaN	NaN	NaN	NaN	2.42812			13	1	1	66.3	2.8	2.8	42.274	3.5564	234620000	6183400	228440000	0	NaN	0	2.32812	Q9NQC3-5	Q9NQC3-5	Reticulon-4	RTN4
NaN	NaN	NaN	NaN	NaN	NaN			2	2	2	5	5	5	44.898	3.728	47597000	4681800	42915000	0	NaN	0	NaN	Q9NRC8;I3L2A4;Q9NRC8-2;Q9NRC8-3	Q9NRC8;I3L2A4;Q9NRC8-2;Q9NRC8-3	NAD-dependent protein deacetylase sirtuin-7	SIRT7
NaN	NaN	NaN	NaN	NaN	NaN			1	1	1	16.1	16.1	16.1	13.671	5.0604	157110000	157110000	0	0	NaN	0	NaN	Q9NRX4-2;Q9NRX4	Q9NRX4-2;Q9NRX4	14 kDa phosphohistidine phosphatase	PHPT1
NaN	NaN	NaN	NaN	NaN	NaN			1	1	1	6.4	6.4	6.4	22.417	4.7977	66239000	35842000	30397000	0	NaN	0	NaN	Q9NV56	Q9NV56	MRG/MORF4L-binding protein	MRGBP
NaN	NaN	NaN	NaN	0.442545	NaN			2	2	2	8.1	8.1	8.1	23.834	2.4919	323720000	164700000	159020000	0	NaN	0	0.342545	Q9NWB6-3;Q9NWB6-2;Q9NWB6	Q9NWB6-3;Q9NWB6-2;Q9NWB6	Arginine and glutamate-rich protein 1	ARGLU1
NaN	NaN	NaN	NaN	NaN	NaN			2	2	2	2.6	2.6	2.6	117.15	23.466	152440000	84743000	67693000	0	NaN	0	NaN	Q9NWH9;H0YLW7;H0YMW8;H0YMM0;H0YNF3;H0YMR6;H0YLE6;H0YL55;H7BXE3;H7C3F4;Q9NWH9-3	Q9NWH9;H0YLW7;H0YMW8;H0YMM0;H0YNF3;H0YMR6;H0YLE6;H0YL55;H7BXE3;H7C3F4;Q9NWH9-3	SAFB-like transcription modulator	SLTM
NaN	NaN	NaN	NaN	NaN	NaN			2	2	2	11.5	11.5	11.5	20.419	3.2209	15905000	3621600	12284000	0	NaN	0	NaN	Q9NX76	Q9NX76	CKLF-like MARVEL transmembrane domain-containing protein 6	CMTM6
NaN	NaN	NaN	NaN	NaN	NaN			2	2	2	1.9	1.9	1.9	174.97	4.6304	43740000	14206000	29534000	0	NaN	0	NaN	Q9NYU2-2;Q9NYU2	Q9NYU2-2;Q9NYU2	UDP-glucose:glycoprotein glucosyltransferase 1	UGGT1
NaN	NaN	NaN	NaN	1.5432	0.751635			3	3	3	6.3	6.3	6.3	74.535	7.6551	50902000	18277000	32625000	0	NaN	0.638276	1.04742	Q9NYY8-2;Q9NYY8	Q9NYY8-2;Q9NYY8	FAST kinase domain-containing protein 2	FASTKD2
NaN	NaN	NaN	NaN	NaN	NaN			2	2	1	11.4	11.4	7.8	24.915	5.8672	20254000	2143000	18111000	0	NaN	0	NaN	Q9P0I2-2;Q9P0I2	Q9P0I2-2;Q9P0I2	ER membrane protein complex subunit 3	EMC3
NaN	NaN	NaN	NaN	NaN	1.31394			2	2	2	43.6	43.6	43.6	6.2484	2.7001	99829000	38174000	61655000	0	NaN	0	1.21394	Q9P0U1;B5MD00;A0A087WZY2;A6NIV2	Q9P0U1;B5MD00;A0A087WZY2;A6NIV2	Mitochondrial import receptor subunit TOM7 homolog	TOMM7
NaN	NaN	NaN	NaN	NaN	NaN			3	3	3	50.6	50.6	50.6	9.0564	29.814	158880000	158880000	0	0	NaN	0	NaN	Q9P1F3;Q5SZC9	Q9P1F3	Costars family protein ABRACL	ABRACL
NaN	NaN	NaN	NaN	NaN	NaN			3	3	3	3.1	3.1	3.1	148.35	4.5777	33545000	7047000	26498000	0	NaN	0	NaN	Q9P266	Q9P266	Junctional protein associated with coronary artery disease	KIAA1462
NaN	NaN	NaN	NaN	NaN	NaN			1	1	1	2.4	2.4	2.4	62.543	3.9364	92728000	33920000	58808000	0	NaN	0	NaN	Q9P270	Q9P270	SLAIN motif-containing protein 2	SLAIN2
NaN	NaN	NaN	NaN	NaN	3.43069			2	2	2	23.9	23.9	23.9	10.094	8.8184	289630000	17324000	272300000	0	NaN	0	3.33069	Q9P2X0;Q9P2X0-2	Q9P2X0;Q9P2X0-2	Dolichol-phosphate mannosyltransferase subunit 3	DPM3
NaN	NaN	NaN	NaN	NaN	NaN			2	2	2	12.3	12.3	12.3	22.151	7.08	13342000	2063600	11278000	0	NaN	0	NaN	Q9UBI1;R4GN06;Q5T8Z1;R4GNF2;R4GN54;H0Y4E5;R4GMW6;H0Y4W0;H0Y6Z9;R4GMX3	Q9UBI1;R4GN06;Q5T8Z1;R4GNF2;R4GN54;H0Y4E5;R4GMW6;H0Y4W0;H0Y6Z9;R4GMX3	COMM domain-containing protein 3	COMMD3;COMMD3-BMI1
NaN	NaN	NaN	NaN	NaN	NaN			4	4	4	11.6	11.6	11.6	54.489	23.057	331310000	18661000	312650000	0	NaN	0	NaN	Q9UBM7;E9PJ54;H0YE57;E9PM00;E9PRL8;E9PQ71;E9PIP9	Q9UBM7;E9PJ54;H0YE57;E9PM00	7-dehydrocholesterol reductase	DHCR7
NaN	NaN	NaN	NaN	0.0977456	NaN			1	1	1	3.3	3.3	3.3	33.868	2.5093	219770000	97552000	122220000	0	NaN	0	-0.00225445	Q9UBR2	Q9UBR2	Cathepsin Z	CTSZ
NaN	NaN	NaN	NaN	NaN	NaN			8	1	1	38	3.5	3.5	31.282	2.1783	25702000	6260100	19442000	0	NaN	0	NaN	Q9UBX3;Q9UBX3-2;F6RGN5	Q9UBX3;Q9UBX3-2;F6RGN5	Mitochondrial dicarboxylate carrier	SLC25A10
NaN	NaN	NaN	NaN	NaN	NaN			1	1	1	27	27	27	7.3084	2.9036	16908000	3477400	13431000	0	NaN	0	NaN	Q9UDW1	Q9UDW1	Cytochrome b-c1 complex subunit 9	UQCR10
NaN	NaN	NaN	NaN	NaN	NaN			1	1	1	4.9	4.9	4.9	35.867	12.187	59685000	25639000	34046000	0	NaN	0	NaN	Q9UET6-2;Q9UET6	Q9UET6-2;Q9UET6	Putative tRNA (cytidine(32)/guanosine(34)-2-O)-methyltransferase	FTSJ1
NaN	NaN	NaN	NaN	NaN	NaN			1	1	1	2.2	2.2	2.2	71.289	3.903	15265000	5395200	9869700	0	NaN	0	NaN	Q9UG63;Q9UG63-2	Q9UG63;Q9UG63-2	ATP-binding cassette sub-family F member 2	ABCF2
NaN	NaN	NaN	NaN	0.385818	NaN			65	1	1	69.9	2	2	85.223	8.2787	3502500000	1413300000	2089300000	0	NaN	0	0.285818	Q9UHB6-4;Q9UHB6-5;F8VTU2;F8VVQ7;J3QQM5;Q9BT23	Q9UHB6-4;Q9UHB6-5	LIM domain and actin-binding protein 1	LIMA1
NaN	NaN	NaN	NaN	NaN	NaN			1	1	1	4.1	4.1	4.1	66.107	28.149	26943000	26943000	0	0	NaN	0	NaN	Q9UHB9-4;Q9UHB9-2;Q9UHB9	Q9UHB9-4;Q9UHB9-2;Q9UHB9	Signal recognition particle subunit SRP68	SRP68
NaN	NaN	NaN	0.0836559	NaN	NaN			2	2	2	9.2	9.2	9.2	21.604	2.6743	104550000	45805000	58747000	0	NaN	0	-0.0163441	Q9UJY1	Q9UJY1	Heat shock protein beta-8	HSPB8
NaN	NaN	NaN	NaN	NaN	2.59663			2	2	2	10.3	10.3	10.3	33.337	20.61	332670000	60308000	272360000	0	NaN	0	2.49663	Q9UJZ1-2;Q9UJZ1	Q9UJZ1-2;Q9UJZ1	Stomatin-like protein 2, mitochondrial	STOML2
NaN	NaN	NaN	NaN	NaN	-0.415249			1	1	1	6.8	6.8	6.8	46.862	8.7532	86629000	37799000	48830000	0	NaN	0	-0.515249	Q9UKX7-2;Q9UKX7	Q9UKX7-2;Q9UKX7	Nuclear pore complex protein Nup50	NUP50
NaN	NaN	NaN	NaN	NaN	NaN			1	1	1	7.6	7.6	7.6	24.347	7.039	13025000	1201500	11823000	0	NaN	0	NaN	Q9UL25	Q9UL25	Ras-related protein Rab-21	RAB21
NaN	NaN	NaN	NaN	NaN	NaN			2	2	2	7.8	7.8	7.8	46.674	7.0865	102110000	52684000	49426000	0	NaN	0	NaN	Q9ULX3;H3BUR4	Q9ULX3;H3BUR4	RNA-binding protein NOB1	NOB1
NaN	NaN	NaN	NaN	NaN	NaN			2	2	2	18.5	18.5	18.5	14.569	2.2193	9820600	4654100	5166500	0	NaN	0	NaN	Q9ULX9-2;Q9ULX9;B0QY71;B0QY70	Q9ULX9-2;Q9ULX9;B0QY71;B0QY70	Transcription factor MafF	MAFF
NaN	NaN	NaN	NaN	NaN	NaN			50	1	0	11.4	0.1	0	614.15	2.6964	197280000	88562000	108720000	0	NaN	0	NaN	Q9UPN3-3;Q9UPN3-2;Q9UPN3-4;H0Y390;E9PLY5;E9PNZ4;E9PLY0;H0YD69;H0Y314;H0Y6T5;H0Y4F5;H0Y7I1;E9PS75	Q9UPN3-3;Q9UPN3-2;Q9UPN3-4;H0Y390		MACF1
NaN	NaN	NaN	NaN	NaN	NaN			5	5	5	23.5	23.5	23.5	38.059	25.781	247640000	38887000	208760000	0	NaN	0	NaN	Q9UQ80-2;Q9UQ80;F8VR77;H0YIN7;F8W0A3	Q9UQ80-2;Q9UQ80;F8VR77;H0YIN7;F8W0A3	Proliferation-associated protein 2G4	PA2G4
NaN	NaN	NaN	NaN	NaN	NaN			1	1	1	3.3	3.3	3.3	38.242	3.4792	199700000	42416000	157290000	0	NaN	0	NaN	Q9Y266	Q9Y266	Nuclear migration protein nudC	NUDC
NaN	NaN	NaN	NaN	NaN	NaN			1	1	1	13.7	13.7	13.7	20.538	3.5153	12479000	12479000	0	0	NaN	0	NaN	Q9Y2Q3-4;Q9Y2Q3-3;Q9Y2Q3;Q9Y2Q3-2	Q9Y2Q3-4;Q9Y2Q3-3;Q9Y2Q3;Q9Y2Q3-2	Glutathione S-transferase kappa 1	GSTK1
NaN	NaN	NaN	NaN	NaN	NaN			3	3	3	48.8	48.8	48.8	13.507	6.981	30063000	5037300	25026000	0	NaN	0	NaN	Q9Y2Q5;Q9Y2Q5-2;Q9Y2Q5-3	Q9Y2Q5;Q9Y2Q5-2;Q9Y2Q5-3	Ragulator complex protein LAMTOR2	LAMTOR2
NaN	NaN	NaN	NaN	2.67746	3.87823			6	6	6	21.2	21.2	21.2	42.033	11.355	220670000	38738000	181930000	0	NaN	0.924912	3.17785	Q9Y2S7;B4DEM9	Q9Y2S7;B4DEM9	Polymerase delta-interacting protein 2	POLDIP2
NaN	NaN	NaN	NaN	NaN	NaN			2	2	2	2.1	2.1	2.1	99.996	2.5404	211910000	3763900	208140000	0	NaN	0	NaN	Q9Y2U8	Q9Y2U8	Inner nuclear membrane protein Man1	LEMD3
NaN	NaN	NaN	NaN	NaN	NaN			2	2	2	35.4	35.4	35.4	15.892	23.225	63536000	32926000	30610000	0	NaN	0	NaN	Q9Y2V2;H3BSW7;H3BUY4;H3BPY5;H3BNU9	Q9Y2V2;H3BSW7;H3BUY4;H3BPY5;H3BNU9	Calcium-regulated heat stable protein 1	CARHSP1
NaN	NaN	NaN	NaN	NaN	NaN			1	1	1	1.4	1.4	1.4	108.66	3.2699	106100000	91615000	14489000	0	NaN	0	NaN	Q9Y2W1	Q9Y2W1	Thyroid hormone receptor-associated protein 3	THRAP3
NaN	NaN	NaN	NaN	NaN	NaN			3	3	3	7.8	7.8	7.8	59.578	9.1552	206340000	108360000	97972000	0	NaN	0	NaN	Q9Y2X3;H7BZ72	Q9Y2X3	Nucleolar protein 58	NOP58
NaN	NaN	NaN	NaN	NaN	NaN			2	2	2	7.7	7.7	7.7	43.206	9.2581	84672000	38152000	46520000	0	NaN	0	NaN	Q9Y305-3;Q9Y305-2;Q9Y305;Q9Y305-4;C9J7L8	Q9Y305-3;Q9Y305-2;Q9Y305;Q9Y305-4;C9J7L8	Acyl-coenzyme A thioesterase 9, mitochondrial	ACOT9
NaN	NaN	NaN	NaN	NaN	NaN			2	2	2	17.5	17.5	17.5	31.307	35.863	15906000	15906000	0	0	NaN	0	NaN	Q9Y316-2;Q9Y316;B5MCI6;Q9Y316-3	Q9Y316-2;Q9Y316;B5MCI6;Q9Y316-3	Protein MEMO1	MEMO1
NaN	NaN	NaN	NaN	NaN	NaN			1	1	1	3.9	3.9	3.9	31.484	2.3791	32041000	27328000	4713300	0	NaN	0	NaN	Q9Y3B9	Q9Y3B9	RRP15-like protein	RRP15
NaN	NaN	NaN	NaN	NaN	NaN			1	1	1	8.4	8.4	8.4	21.188	2.3934	0	0	0	0	NaN	0	NaN	Q9Y3C1	Q9Y3C1	Nucleolar protein 16	NOP16
NaN	NaN	NaN	NaN	NaN	NaN			2	2	2	27	27	27	17.663	14.35	65857000	2750000	63107000	0	NaN	0	NaN	Q9Y3D0;J3QLT9;H3BNV7	Q9Y3D0;J3QLT9;H3BNV7	Mitotic spindle-associated MMXD complex subunit MIP18	FAM96B
NaN	NaN	NaN	NaN	NaN	NaN			1	1	1	7.7	7.7	7.7	17.326	4.5333	100520000	42901000	57615000	0	NaN	0	NaN	Q9Y3E7-2;Q9Y3E7-4;Q9Y3E7;Q9Y3E7-3	Q9Y3E7-2;Q9Y3E7-4;Q9Y3E7;Q9Y3E7-3	Charged multivesicular body protein 3	CHMP3
NaN	NaN	NaN	NaN	2.771	NaN			3	1	1	16.4	4.9	4.9	20.745	2.7395	141520000	21812000	119710000	0	NaN	0	2.671	Q9Y3L5;F6U784;P10114;A0A087X2C3	Q9Y3L5;F6U784;P10114	Ras-related protein Rap-2c;Ras-related protein Rap-2a	RAP2C;RAP2A
NaN	NaN	NaN	NaN	NaN	NaN			2	2	2	5.3	5.3	5.3	51.976	8.4866	156720000	63499000	93219000	0	NaN	0	NaN	Q9Y512	Q9Y512	Sorting and assembly machinery component 50 homolog	SAMM50
NaN	NaN	NaN	NaN	NaN	NaN			2	2	2	27.8	27.8	27.8	16.297	27.232	17697000	16929000	768300	0	NaN	0	NaN	Q9Y547;A6NIR2;X6R7Y7	Q9Y547;A6NIR2;X6R7Y7	Intraflagellar transport protein 25 homolog	HSPB11
NaN	NaN	NaN	NaN	1.93028	NaN			3	3	3	17.6	17.6	17.6	22.461	5.0784	99009000	22419000	76590000	0	NaN	0	1.83028	Q9Y570-2;Q9Y570;Q9Y570-4;Q9Y570-3	Q9Y570-2;Q9Y570;Q9Y570-4	Protein phosphatase methylesterase 1	PPME1
NaN	NaN	NaN	NaN	NaN	NaN			1	1	1	3.1	3.1	3.1	62.003	3.513	11226000	3877500	7348300	0	NaN	0	NaN	Q9Y5J1	Q9Y5J1	U3 small nucleolar RNA-associated protein 18 homolog	UTP18
NaN	NaN	NaN	NaN	NaN	NaN			1	1	1	1.6	1.6	1.6	71.45	2.8528	46193000	12249000	33944000	0	NaN	0	NaN	Q9Y5K6	Q9Y5K6	CD2-associated protein	CD2AP
NaN	NaN	NaN	NaN	NaN	NaN			1	1	1	6.8	6.8	6.8	35.188	3.0934	19249000	19249000	0	0	NaN	0	NaN	Q9Y617-2;Q9Y617	Q9Y617-2;Q9Y617	Phosphoserine aminotransferase	PSAT1
NaN	NaN	NaN	NaN	NaN	NaN			2	2	2	4.3	4.3	4.3	54.226	3.747	100760000	71395000	29366000	0	NaN	0	NaN	Q9Y6V7;M0R1S3;M0QZC0;M0R0K1;Q9Y6V7-2	Q9Y6V7;M0R1S3;M0QZC0;M0R0K1;Q9Y6V7-2	Probable ATP-dependent RNA helicase DDX49	DDX49
NaN	NaN	NaN	NaN	NaN	-1.80143			4	4	4	3.9	3.9	3.9	145.44	16.015	79878000	74195000	5683100	0	NaN	0	-1.90143	S4R3H4;E7EQT4;Q9UKV3-5;Q9UKV3	S4R3H4;E7EQT4;Q9UKV3-5;Q9UKV3	Apoptotic chromatin condensation inducer in the nucleus	ACIN1
NaN	NaN	NaN	NaN	NaN	NaN			4	4	0	22.2	22.2	0	29.736	11.808	108470000	19940000	88534000	0	NaN	0	NaN	S4R3N1;B4DM50;Q9Y3A3-2;Q9Y3A3-3	S4R3N1;B4DM50;Q9Y3A3-2;Q9Y3A3-3	MOB-like protein phocein	HSPE1-MOB4;MOB4
5.89059	NaN	2.36093	2.45586	4.84995	5.2857			7	7	7	28.3	28.3	28.3	30.658	48.008	1741100000	72184000	1668900000	0.580009	4.02576	1.36514	4.09717	Q9Y277;Q9Y277-2;E5RFP6;E5RJN6;E5RHZ6;E5RK27;E5RHE1;E5RFL1	Q9Y277;Q9Y277-2;E5RFP6;E5RJN6;E5RHZ6;E5RK27	Voltage-dependent anion-selective channel protein 3	VDAC3
NaN	NaN	3.46884	NaN	NaN	NaN			2	2	2	33.8	33.8	33.8	7.2883	5.7338	69288000	5185700	64102000	0	3.36884	0	NaN	F5H895;A0A0B4J239;F5GXX5;P61803	F5H895;A0A0B4J239;F5GXX5;P61803	Dolichyl-diphosphooligosaccharide--protein glycosyltransferase subunit DAD1	DAD1
3.4551	NaN	NaN	NaN	NaN	4.69193			4	4	4	21.6	21.6	21.6	19.835	7.1887	162700000	5671000	157030000	0	3.3551	0	4.59193	Q8N0U8;Q8N0U8-2	Q8N0U8;Q8N0U8-2	Vitamin K epoxide reductase complex subunit 1-like protein 1	VKORC1L1
2.44008	2.61504	5.29514	NaN	NaN	NaN			7	7	7	30.7	30.7	30.7	32.551	16.486	490990000	64995000	426000000	1.16525	3.35008	0	NaN	R4GMR5;P48556;K7EJR3;K7EJC1;K7ERW6;K7ENY6	R4GMR5;P48556;K7EJR3;K7EJC1	26S proteasome non-ATPase regulatory subunit 8	PSMD8
3.86126	2.82924	NaN	2.41373	2.81482	6.11255			2	2	2	13.7	13.7	13.7	17.49	10.32	1669500000	342770000	1326700000	0.99833	3.24525	1.05465	3.68037	P30049	P30049	ATP synthase subunit delta, mitochondrial	ATP5D
3.30263	NaN	NaN	NaN	NaN	NaN			1	1	1	12.5	12.5	12.5	11.082	3.5862	108640000	3353600	105290000	0	3.20263	0	NaN	I3L3B4;F8W9H0;E9PLN8;Q9BQB6-3;Q9BQB6-2;Q9BQB6	I3L3B4;F8W9H0;E9PLN8;Q9BQB6-3;Q9BQB6-2;Q9BQB6	Vitamin K epoxide reductase complex subunit 1	VKORC1
3.15012	NaN	NaN	NaN	NaN	NaN			3	2	2	17	11.5	11.5	22.541	5.7963	76369000	2942800	73426000	0	3.05012	0	NaN	P61026	P61026	Ras-related protein Rab-10	RAB10
NaN	2.84848	NaN	3.17031	3.01209	3.30337		+	5	5	3	11.8	11.8	8.5	52.949	14.63	799760000	128240000	671520000	0	2.74848	3.12194	3.06192	B4DR61;P61619;P61619-3	B4DR61;P61619	Protein transport protein Sec61 subunit alpha isoform 1	SEC61A1
NaN	2.81065	NaN	NaN	NaN	NaN			2	2	2	7.2	7.2	7.2	23.865	2.5986	97696000	6442300	91254000	0	2.71065	0	NaN	Q8WUY1;H0YAR9	Q8WUY1;H0YAR9	Protein THEM6	THEM6
NaN	2.79519	NaN	NaN	NaN	NaN			2	2	2	4.2	4.2	4.2	96.669	6.5732	11923000	796770	11126000	0	2.69519	0	NaN	E9PFH4;Q9Y5L0-3;Q9Y5L0;C9J7E5;Q9Y5L0-5;Q9Y5L0-1	E9PFH4;Q9Y5L0-3;Q9Y5L0;C9J7E5;Q9Y5L0-5;Q9Y5L0-1	Transportin-3	TNPO3
2.78764	NaN	NaN	NaN	NaN	NaN			2	2	2	22.8	22.8	22.8	16.828	4.6977	111470000	25190000	86285000	0	2.68764	0	NaN	P51636-2;P51636;E9PCT3	P51636-2;P51636;E9PCT3	Caveolin-2;Caveolin	CAV2
NaN	2.73589	NaN	NaN	1.99895	NaN			4	4	4	6	6	6	90.126	19.894	102950000	12821000	90125000	0	2.63589	0	1.89895	Q9NXE4-2;Q9NXE4;Q9NXE4-4;H7C235;H7C0W5;H7C1Q6;H7BXF4;B1PBA3;Q9NXE4-9;Q9NXE4-10;Q9NXE4-7;Q9NXE4-8;Q9NXE4-3;Q9NXE4-6;H7C2J2;F8WF03;F2Z2I0;F2Z2W5;C9J647;H7C2E2;Q9NXE4-5	Q9NXE4-2;Q9NXE4;Q9NXE4-4;H7C235;H7C0W5;H7C1Q6;H7BXF4;B1PBA3;Q9NXE4-9;Q9NXE4-10;Q9NXE4-7;Q9NXE4-8;Q9NXE4-3;Q9NXE4-6;H7C2J2	Sphingomyelin phosphodiesterase 4	SMPD4
2.5553	NaN	NaN	NaN	NaN	NaN			4	4	4	15.7	15.7	15.7	31.791	8.3903	295250000	22983000	272270000	0	2.4553	0	NaN	Q9H3N1;G3V448	Q9H3N1;G3V448	Thioredoxin-related transmembrane protein 1	TMX1
2.02609	2.92754	NaN	NaN	NaN	NaN			3	3	3	16.9	16.9	16.9	18.416	16.52	162500000	18114000	144390000	0.923333	2.37681	0	NaN	Q5VV89;O14880;Q5VV87	Q5VV89;O14880	Microsomal glutathione S-transferase 3	MGST3
NaN	NaN	2.47674	NaN	NaN	NaN			3	3	3	16.7	16.7	16.7	25.411	8.5414	167570000	5841100	161730000	0	2.37674	0	NaN	C9JRD2;C9JXB9;P25686-2;P25686;C9J1G2;E7ETU0;C9JX00	C9JRD2;C9JXB9;P25686-2;P25686;C9J1G2;E7ETU0;C9JX00	DnaJ homolog subfamily B member 2	DNAJB2
NaN	NaN	2.41646	NaN	NaN	2.92998			3	3	3	22.9	22.9	22.9	20.437	7.0484	210400000	41184000	169210000	0	2.31646	0	2.82998	V9GYS0;O60830;O60830-2;V9GYU0	V9GYS0;O60830;O60830-2	Mitochondrial import inner membrane translocase subunit Tim17-B	TIMM17B
2.66432	1.1944	3.35572	NaN	NaN	NaN			7	7	7	23.1	23.1	23.1	44.561	64.785	682560000	101590000	580960000	1.16325	2.30482	0	NaN	Q14318;Q14318-2;U3KQ64;A0A0A0MTJ1;Q14318-3;U3KQI1;M0R2K9	Q14318;Q14318-2;U3KQ64;A0A0A0MTJ1;Q14318-3	Peptidyl-prolyl cis-trans isomerase FKBP8	FKBP8
NaN	1.60212	3.1947	NaN	NaN	3.07998			4	4	4	33.1	33.1	33.1	13.291	9.5538	89580000	11312000	78269000	0.673011	2.29841	0	2.97998	Q5RI15;Q5RI15-2	Q5RI15;Q5RI15-2	Cytochrome c oxidase protein 20 homolog	COX20
0.579277	3.1076	3.23222	NaN	NaN	NaN			4	4	4	27.8	27.8	27.8	21.569	15.698	270330000	147740000	122590000	0.902186	2.20637	0	NaN	Q13636;J3QR51;Q9UL26	Q13636	Ras-related protein Rab-31	RAB31
2.99355	2.95131	0.953749	NaN	3.06733	3.19257			3	3	3	24.2	24.2	24.2	18.566	25.843	446220000	55383000	390840000	1.08493	2.19954	1.88089	3.02995	P60604;P60604-2;F8WCB9;F8WDB1	P60604;P60604-2	Ubiquitin-conjugating enzyme E2 G2	UBE2G2
3.08175	1.42401	NaN	0.810073	NaN	NaN			4	4	4	12.7	12.7	12.7	52.904	10.482	192520000	30067000	162460000	0.630846	2.15288	0	0.710073	O00232;O00232-2	O00232;O00232-2	26S proteasome non-ATPase regulatory subunit 12	PSMD12
NaN	NaN	2.23891	NaN	NaN	NaN			5	5	5	29.5	29.5	29.5	29.204	12.553	265250000	54161000	211090000	0	2.13891	0	NaN	P28070	P28070	Proteasome subunit beta type-4	PSMB4
NaN	NaN	2.23836	NaN	NaN	NaN			2	2	2	5.1	5.1	5.1	54.666	6.9756	98179000	9837900	88341000	0	2.13836	0	NaN	Q5VV42-2;Q5VV42	Q5VV42-2;Q5VV42	Threonylcarbamoyladenosine tRNA methylthiotransferase	CDKAL1
2.40117	1.98076	NaN	NaN	NaN	NaN			12	12	12	6.1	6.1	6.1	292.75	30.218	200390000	14121000	186270000	1.19528	2.09096	0	NaN	Q92616	Q92616	Translational activator GCN1	GCN1L1
2.12492	NaN	NaN	NaN	NaN	2.88663			4	4	4	20	20	20	27.277	16.658	274320000	36423000	237900000	0	2.02492	0	2.78663	Q9BVK6;F8W7F7;Q7Z7H5-3;Q7Z7H5-2;Q7Z7H5	Q9BVK6	Transmembrane emp24 domain-containing protein 9	TMED9
NaN	NaN	2.11303	NaN	NaN	NaN			4	4	4	26.4	26.4	26.4	20.03	7.7363	29722000	8025800	21696000	0	2.01303	0	NaN	E9PR44;P02511;E9PJL7;E9PRA8;E9PRS4;E9PS12;A0A024R3B9;E9PNH7;H0YCW8	E9PR44;P02511;E9PJL7;E9PRA8;E9PRS4;E9PS12;A0A024R3B9	Alpha-crystallin B chain	CRYAB
2.27787	1.87661	NaN	NaN	NaN	NaN			1	1	1	22.4	22.4	22.4	5.8575	7.1365	1304100000	181700000	1122400000	1.19127	1.97724	0	NaN	C9JB90;C9JU14;J3KR73;P20340-4;Q9NRW1-2;Q9NRW1;P20340-2;P20340;Q14964	C9JB90;C9JU14;J3KR73;P20340-4;Q9NRW1-2;Q9NRW1;P20340-2;P20340;Q14964	Ras-related protein Rab-6A;Ras-related protein Rab-6B;Ras-related protein Rab-39A	RAB6B;RAB6A;RAB39A
2.07351	NaN	NaN	NaN	NaN	NaN			3	3	3	23.9	23.9	23.9	20.497	8.4966	31062000	9256500	21806000	0	1.97351	0	NaN	Q15382;C9J931	Q15382;C9J931	GTP-binding protein Rheb	RHEB
1.57352	NaN	2.54713	NaN	NaN	NaN			2	2	2	9.3	9.3	9.3	24.997	7.2704	257270000	35816000	221450000	0.809791	1.96032	0	NaN	Q13637;O14966;P57729	Q13637;O14966;P57729	Ras-related protein Rab-32;Ras-related protein Rab-7L1;Ras-related protein Rab-38	RAB32;RAB29;RAB38
NaN	1.75643	2.20789	NaN	NaN	2.95606			3	3	3	11.6	11.6	11.6	30.292	10.435	148560000	23317000	125250000	1.11925	1.88216	0	2.85606	K7EK00;Q96ND0;K7ERQ2;K7EPG9	K7EK00;Q96ND0;K7ERQ2	Protein FAM210A	FAM210A
1.97085	NaN	NaN	NaN	NaN	NaN			2	2	2	27.5	27.5	27.5	6.0352	2.1988	63264000	10519000	52745000	0	1.87085	0	NaN	Q8N4H5;F8W8Z9;Q8N4H5-3;Q8N4H5-2	Q8N4H5;F8W8Z9;Q8N4H5-3;Q8N4H5-2	Mitochondrial import receptor subunit TOM5 homolog	TOMM5
1.93648	NaN	NaN	NaN	NaN	NaN			3	3	3	23.1	23.1	23.1	25.898	28.843	163040000	43337000	119710000	0	1.83648	0	NaN	A0A024RA52;P25787;H3BT36;H7C402;C9JCK5	A0A024RA52;P25787;H3BT36	Proteasome subunit alpha type;Proteasome subunit alpha type-2	PSMA2
1.2092	1.77703	2.72733	NaN	NaN	NaN			6	6	6	9	9	9	107.14	16.246	189180000	20219000	168970000	1.25742	1.80452	0	NaN	P53618;E9PP73	P53618;E9PP73	Coatomer subunit beta	COPB1
1.43861	2.36471	NaN	NaN	NaN	NaN			2	2	2	5.6	5.6	5.6	57.933	8.2055	80254000	10467000	69787000	0.795465	1.80166	0	NaN	Q86SJ2	Q86SJ2	Amphoterin-induced protein 2	AMIGO2
NaN	1.89017	NaN	NaN	NaN	NaN			4	4	4	8.2	8.2	8.2	87.996	7.3845	83587000	14360000	69226000	0	1.79017	0	NaN	Q9UGP8	Q9UGP8	Translocation protein SEC63 homolog	SEC63
1.88456	NaN	NaN	NaN	NaN	NaN			4	4	4	5.8	5.8	5.8	100.29	16.919	157100000	24758000	132340000	0	1.78456	0	NaN	O76024;H0Y9G5	O76024;H0Y9G5	Wolframin	WFS1
2.73749	0.245374	2.66635	NaN	NaN	NaN			8	8	8	28.9	28.9	28.9	47.366	94.383	522040000	193380000	328660000	0.792026	1.78307	0	NaN	P43686;P43686-2	P43686;P43686-2	26S protease regulatory subunit 6B	PSMC4
1.735	2.0171	NaN	2.7124	2.32478	2.43144		+	6	6	5	30.4	30.4	26.6	20.987	16.087	516040000	98371000	417670000	1.29711	1.77605	2.6322	2.38954	P62834;A0A075B6Q0;P61224-2;P61224-3;P61224;F5H004;F5GX62;E7ESV4;F5H7Y6;F5H4H0;F5GYH7;F5H077;F5GWU8;F5H491;F5H0B7;F5H500;F5H6R7;F5GYB5;A0A0J9YXB3;P61224-4;A6NIZ1;F5H823;B7ZB78;F5GZG1;F8WBC0	P62834;A0A075B6Q0;P61224-2;P61224-3;P61224;F5H004;F5GX62;E7ESV4;F5H7Y6;F5H4H0;F5GYH7;F5H077;F5GWU8;F5H491;F5H0B7;F5H500;F5H6R7;F5GYB5;A0A0J9YXB3;P61224-4;A6NIZ1	Ras-related protein Rap-1A;Ras-related protein Rap-1b;Ras-related protein Rap-1b-like protein	RAP1A;RAP1B
1.85925	NaN	NaN	NaN	2.02981	NaN			3	3	3	13.9	13.9	13.9	41.522	26.779	323610000	68014000	255590000	0	1.75925	0	1.92981	O00767	O00767	Acyl-CoA desaturase	SCD
1.66512	2.03668	NaN	NaN	NaN	NaN			5	5	5	46	46	46	17.745	14.989	122620000	37636000	84987000	1.172	1.7509	0	NaN	Q6IAA8;F5GX19;F5H3Y3;H0YFI1;F5H479	Q6IAA8;F5GX19;F5H3Y3;H0YFI1;F5H479	Ragulator complex protein LAMTOR1	LAMTOR1
1.9249	1.65283	NaN	3.03383	3.21372	2.9159		+	5	5	5	66.2	66.2	66.2	15.521	40.944	683000000	96262000	586740000	1.291	1.68886	3.06658	2.95448	Q9NS69	Q9NS69	Mitochondrial import receptor subunit TOM22 homolog	TOMM22
1.97074	1.54468	NaN	2.34474	2.50203	2.59972		+	12	12	11	51.4	51.4	45.5	35.503	74.156	4765700000	982600000	3783100000	1.08956	1.65771	3.01291	2.38216	A0A0A0MS41;Q9BWM7;S4R3N9	A0A0A0MS41;Q9BWM7;S4R3N9	Sideroflexin;Sideroflexin-3	SFXN3
NaN	1.74765	NaN	NaN	NaN	NaN			2	2	2	25.9	25.9	25.9	12.199	6.1116	38329000	8913600	29416000	0	1.64765	0	NaN	Q9NZ45	Q9NZ45	CDGSH iron-sulfur domain-containing protein 1	CISD1
1.432	NaN	2.0587	NaN	NaN	NaN			5	5	5	3.7	3.7	3.7	157.18	7.4636	43312000	7667000	35645000	0.921518	1.64535	0	NaN	Q15021;E7EN77	Q15021;E7EN77	Condensin complex subunit 1	NCAPD2
2.45618	1.10118	1.62134	NaN	NaN	NaN			1	1	1	14.6	14.6	14.6	15.771	7.6659	358830000	58212000	300620000	1.26637	1.62623	0	NaN	A6NLH6;Q9P003	A6NLH6;Q9P003	Protein cornichon homolog 4	CNIH4
1.15834	2.2681	NaN	0.917394	NaN	1.44631			2	2	2	2.4	2.4	2.4	78.346	2.4016	129330000	30108000	99227000	0.675919	1.61322	0.816365	1.08185	E9PC74;Q13144	E9PC74;Q13144	Translation initiation factor eIF-2B subunit epsilon	EIF2B5
NaN	1.07765	2.34506	NaN	NaN	NaN			11	11	11	31	31	31	57.278	95.357	853620000	43899000	809720000	0.622444	1.61135	0	NaN	A0A0C4DFL7;Q16850;Q16850-2;H7C0D0;C9IYR8	A0A0C4DFL7;Q16850;Q16850-2	Lanosterol 14-alpha demethylase	CYP51A1
NaN	1.68643	NaN	NaN	2.53742	2.06492			7	7	5	11.7	11.7	8.8	97.717	26.225	168890000	27219000	141670000	0	1.58643	1.16706	2.20117	Q9Y678;H0Y8X7	Q9Y678	Coatomer subunit gamma-1	COPG1
NaN	1.67129	NaN	NaN	NaN	NaN			2	2	2	4.5	4.5	4.5	59.356	6.0614	116430000	23370000	93057000	0	1.57129	0	NaN	Q8WVX9;E9PNW8	Q8WVX9;E9PNW8	Fatty acyl-CoA reductase 1	FAR1
1.41105	NaN	1.92026	2.52062	2.48563	2.35752		+	3	3	3	32.1	32.1	32.1	9.3697	5.3916	401540000	98161000	303380000	0.988734	1.56565	3.3536	2.35459	O00483	O00483	Cytochrome c oxidase subunit NDUFA4	NDUFA4
-0.336246	3.05252	2.26195	NaN	1.5472	0.927517			10	10	10	29.5	29.5	29.5	47.285	53.086	1472300000	313410000	1158900000	0.573322	1.55941	0.771289	1.13736	E9PNM1;P37268;P37268-2;P37268-4;P37268-3;P37268-5;E9PS69;E9PJG4	E9PNM1;P37268;P37268-2;P37268-4;P37268-3;P37268-5	Squalene synthase	FDFT1
NaN	1.64985	NaN	NaN	3.24513	NaN			2	2	2	24.6	24.6	24.6	7.9331	3.5436	207780000	35266000	172510000	0	1.54985	0	3.14513	P56385	P56385	ATP synthase subunit e, mitochondrial	ATP5I
NaN	NaN	1.62504	NaN	NaN	NaN			4	2	2	21.1	8.7	8.7	23.48	4.719	53518000	13253000	40266000	0	1.52504	0	NaN	P10301	P10301	Ras-related protein R-Ras	RRAS
1.62326	NaN	NaN	NaN	NaN	2.46884			4	4	4	1.6	1.6	1.6	274.37	7.4392	136920000	21691000	115230000	0	1.52326	0	2.36884	P11717;S4R328	P11717	Cation-independent mannose-6-phosphate receptor	IGF2R
1.53908	NaN	NaN	NaN	NaN	NaN			3	3	3	30.2	30.2	30.2	11.731	5.5521	28898000	4600100	24298000	0	1.43908	0	NaN	Q9Y2R0;K7EPV0	Q9Y2R0;K7EPV0	Cytochrome c oxidase assembly factor 3 homolog, mitochondrial	COA3
1.53655	NaN	NaN	NaN	NaN	NaN			4	4	4	15.6	15.6	15.6	42.739	17.531	81810000	7026800	74783000	0	1.43655	0	NaN	A0A087WUL9;Q9UNM6;Q9UNM6-2;E9PL38;J3KNQ3;H0YD73;E9PQG3	A0A087WUL9;Q9UNM6;Q9UNM6-2;E9PL38;J3KNQ3;H0YD73	26S proteasome non-ATPase regulatory subunit 13	PSMD13
1.53381	NaN	NaN	NaN	NaN	NaN			2	2	2	20.3	20.3	20.3	17.482	9.8996	93258000	18704000	74554000	0	1.43381	0	NaN	H3BV16;O96000-2;O96000;H3BPJ9	H3BV16;O96000-2;O96000;H3BPJ9	NADH dehydrogenase [ubiquinone] 1 beta subcomplex subunit 10	NDUFB10
1.51142	NaN	NaN	NaN	NaN	2.4598			1	1	1	14.1	14.1	14.1	8.4984	3.4858	135900000	28456000	107440000	0	1.41142	0	2.3598	H0YLF3;F5H6I0;P61769	H0YLF3;F5H6I0;P61769	Beta-2-microglobulin;Beta-2-microglobulin form pI 5.3	B2M
NaN	1.74674	1.26574	-0.273605	NaN	NaN			5	5	5	22.1	22.1	22.1	41.167	33.28	328110000	58494000	269610000	0.967241	1.40624	0	-0.373605	P62191-2;P62191	P62191-2;P62191	26S protease regulatory subunit 4	PSMC1
1.36793	1.61523	NaN	NaN	1.94983	2.37226			8	8	8	27.3	27.3	27.3	36.034	18.018	921320000	194240000	727080000	1.24858	1.39158	1.187	2.06104	Q9NZ01;M0R3C3;M0QXM3;Q9NZ01-2;M0R329;B4DR74	Q9NZ01	Very-long-chain enoyl-CoA reductase	TECR
1.48455	NaN	NaN	NaN	NaN	-1.97932			4	4	4	56.2	56.2	56.2	10.058	7.5087	317400000	215500000	101900000	0	1.38455	0	-2.07932	O75531	O75531	Barrier-to-autointegration factor;Barrier-to-autointegration factor, N-terminally processed	BANF1
NaN	NaN	1.46853	NaN	NaN	NaN			1	1	1	2.3	2.3	2.3	73.449	5.1379	18602000	3965500	14637000	0	1.36853	0	NaN	O75427	O75427	Leucine-rich repeat and calponin homology domain-containing protein 4	LRCH4
1.85535	1.86104	0.607674	NaN	NaN	1.91292			10	10	10	11.6	11.6	11.6	123.38	44.413	344980000	92006000	252980000	1.07308	1.34136	0	1.81292	O14980;C9JKM9;C9IZS4;C9JQ02;C9JV99;C9J673;C9JF49;C9IYM2;H7BZC5;F8WF71	O14980	Exportin-1	XPO1
NaN	1.43669	NaN	NaN	NaN	1.56189			2	2	1	10.2	10.2	4.8	21.539	4.4787	154160000	40069000	114090000	0	1.33669	0	1.46189	Q9NVJ2	Q9NVJ2	ADP-ribosylation factor-like protein 8B	ARL8B
0.528071	2.00432	1.75818	NaN	NaN	NaN			7	7	7	20.5	20.5	20.5	52.743	30.066	1212900000	116660000	1096300000	0.99825	1.33019	0	NaN	O15269;O15269-2	O15269	Serine palmitoyltransferase 1	SPTLC1
1.23487	1.50116	NaN	NaN	NaN	NaN			17	2	2	22.1	4.9	4.9	88.381	20.518	213180000	27593000	185580000	1.17651	1.26801	0	NaN	A0A0B4J269;Q13509;Q13509-2;G3V2A3;G3V5W4;G3V2R8;G3V3R4;G3V2N6	A0A0B4J269;Q13509;Q13509-2	Tubulin beta-3 chain	TUBB3
NaN	1.35061	NaN	NaN	NaN	NaN			3	2	2	11.9	8.7	8.7	24.267	3.1471	205680000	45030000	160650000	0	1.25061	0	NaN	O95716	O95716	Ras-related protein Rab-3D	RAB3D
NaN	1.34704	NaN	NaN	NaN	NaN			5	5	5	17.1	17.1	17.1	53.818	26.861	298100000	55111000	242990000	0	1.24704	0	NaN	O60784;O60784-2;O60784-3;O60784-4;Q6UW50;B0QY01;F8WB30;F8WAW7;F8WE29;F8WBB0;V9GZ68;H7BYN7;V9GYF4;B0QY02	O60784;O60784-2;O60784-3;O60784-4	Target of Myb protein 1	TOM1
NaN	NaN	1.34426	NaN	NaN	3.00371			3	3	3	19.5	19.5	19.5	38.274	31.43	296970000	69502000	227460000	0	1.24426	0	2.90371	O95433;H0YJU2;G3V438;H0YJG7;O95433-2;H0YJ63	O95433;H0YJU2;G3V438;H0YJG7;O95433-2	Activator of 90 kDa heat shock protein ATPase homolog 1	AHSA1
NaN	1.32585	NaN	NaN	NaN	NaN			2	2	2	18.8	18.8	18.8	15.136	4.581	67912000	17109000	50803000	0	1.22585	0	NaN	A0A0C4DGS0;P56556;R4GN43	A0A0C4DGS0;P56556;R4GN43	NADH dehydrogenase [ubiquinone] 1 alpha subcomplex subunit 6	NDUFA6
1.31104	NaN	NaN	2.78056	2.28312	3.81721			13	13	13	8.8	8.8	8.8	186.27	41.568	1312900000	494380000	818550000	0	1.21104	1.61867	2.8603	P52948-6;P52948-2;P52948-5;P52948;P52948-4;P52948-3;H0YEN4;H7C3P6;H0YCR0;H0YDF4	P52948-6;P52948-2;P52948-5;P52948;P52948-4;P52948-3	Nuclear pore complex protein Nup98-Nup96;Nuclear pore complex protein Nup98;Nuclear pore complex protein Nup96	NUP98
1.90789	0.697062	NaN	2.35991	NaN	2.06267			5	5	5	20.1	20.1	20.1	39.646	39.406	464890000	109700000	355190000	0.527341	1.20248	1.34931	2.11129	Q3ZCQ8;Q3ZCQ8-2;M0R0C3;M0R2F8;Q3ZCQ8-3;M0R047;M0R003;M0QXC3;M0R2Z3;M0R303;M0R2D2;M0R1Y4	Q3ZCQ8;Q3ZCQ8-2;M0R0C3;M0R2F8;Q3ZCQ8-3	Mitochondrial import inner membrane translocase subunit TIM50	TIMM50
NaN	1.30036	NaN	NaN	NaN	NaN			4	4	4	37.4	37.4	37.4	19.654	22.032	255110000	136960000	118150000	0	1.20036	0	NaN	H0YLC2;H0YMA1;H0YMZ1;H0YL69;P25789;H0YLS6;H0YKT8;H0YN18;H0YMI6;H0YMV3;H0YKS0;P25789-2	H0YLC2;H0YMA1;H0YMZ1;H0YL69;P25789;H0YLS6;H0YKT8;H0YN18;H0YMI6	Proteasome subunit alpha type;Proteasome subunit alpha type-4;Proteasome subunit beta type	PSMA4
1.29866	NaN	NaN	NaN	NaN	NaN			36	1	0	72.6	5.2	0	28.922	5.4463	261400000	74514000	186890000	0	1.19866	0	NaN	P06753-6	P06753-6
NaN	1.2939	NaN	2.77794	NaN	NaN			5	5	5	9.9	9.9	9.9	107.77	30.934	121920000	61963000	59960000	0	1.1939	0	2.67794	P22102;P22102-2;F8WD69;C9JZG2;C9JKQ7;C9JBJ1;C9JTV6	P22102;P22102-2	Trifunctional purine biosynthetic protein adenosine-3;Phosphoribosylamine--glycine ligase;Phosphoribosylformylglycinamidine cyclo-ligase;Phosphoribosylglycinamide formyltransferase	GART
-0.367155	1.55739	2.58612	NaN	NaN	NaN			5	5	5	9.8	9.8	9.8	102.26	40.385	240300000	80516000	159780000	0.505137	1.15878	0	NaN	Q99460-2;Q99460;A0A087WW66;H7C378;F8WCE3;C9J9M4	Q99460-2;Q99460;A0A087WW66	26S proteasome non-ATPase regulatory subunit 1	PSMD1
1.24993	NaN	NaN	NaN	NaN	NaN			2	2	2	3.8	3.8	3.8	71.988	14.631	84282000	27156000	57126000	0	1.14993	0	NaN	Q13049;Q5JVY0	Q13049;Q5JVY0	E3 ubiquitin-protein ligase TRIM32	TRIM32
0.552377	1.65214	1.51657	2.60651	2.3182	2.51412		+	6	6	6	23.6	23.6	23.6	32.182	36.898	361830000	83022000	278810000	1.0909	1.14036	2.89502	2.37961	I3L1P8;Q02978;Q02978-2	I3L1P8;Q02978;Q02978-2	Mitochondrial 2-oxoglutarate/malate carrier protein	SLC25A11
1.23976	NaN	NaN	NaN	NaN	NaN			6	3	3	52	36.9	36.9	22.41	98.787	377350000	227680000	149680000	0	1.13976	0	NaN	Q9Y6B6;D6RD69;D6RAA2;Q9H029;D6RDB2;D6R9R5	Q9Y6B6;D6RD69;D6RAA2;Q9H029;D6RDB2	GTP-binding protein SAR1b	SAR1B;DKFZp434B2017
0.935611	2.21381	0.479851	NaN	NaN	3.03893			3	3	3	20	20	20	21.527	4.9467	54557000	14421000	40136000	0.780121	1.10976	0	2.93893	Q9H061;E9PI90;Q9H061-2	Q9H061;E9PI90	Transmembrane protein 126A	TMEM126A
NaN	1.20964	NaN	NaN	NaN	NaN			4	4	4	13.7	13.7	13.7	36.864	7.5472	61886000	8805700	53080000	0	1.10964	0	NaN	Q9HBH5;C9J2C7	Q9HBH5	Retinol dehydrogenase 14	RDH14
0.749577	0.796681	2.08124	2.8017	NaN	NaN			3	3	3	12.2	12.2	12.2	20.846	5.2214	412070000	85206000	326870000	0.899312	1.10917	0	2.7017	E9PS95;A0A0D9SEI9;A0A0D9SFE1;E9PJH7;Q9H1K4;Q9H936;K4DIB6;K4DIB3;K4DIB8;K4DIA8;A0A0D9SFA8;K4DIB0;K4DIA2;A0A0D9SG84;E9PI74;E9PQ36	E9PS95;A0A0D9SEI9;A0A0D9SFE1;E9PJH7;Q9H1K4;Q9H936;K4DIB6;K4DIB3;K4DIB8;K4DIA8	Mitochondrial glutamate carrier 2;Mitochondrial glutamate carrier 1	SLC25A22;SLC25A18
NaN	NaN	1.20364	NaN	0.982583	0.66948			2	2	2	6.6	6.6	6.6	40.917	7.6019	175510000	51877000	123640000	0	1.10364	0.869018	0.726032	F5H442;Q99816;J3QRU6;J3QKS4;Q99816-2	F5H442;Q99816;J3QRU6;J3QKS4;Q99816-2	Tumor susceptibility gene 101 protein	TSG101
1.01078	NaN	1.34999	NaN	NaN	NaN			3	3	3	6.2	6.2	6.2	59.204	7.3031	98618000	25161000	73458000	1.00379	1.08038	0	NaN	Q9H6X2-5;Q9H6X2;Q9H6X2-3;Q9H6X2-4;Q9H6X2-6;Q9H6X2-2	Q9H6X2-5;Q9H6X2;Q9H6X2-3;Q9H6X2-4;Q9H6X2-6;Q9H6X2-2	Anthrax toxin receptor 1	ANTXR1
NaN	1.16614	NaN	NaN	NaN	NaN			1	1	1	7.7	7.7	7.7	19.77	4.4873	27804000	6397200	21407000	0	1.06614	0	NaN	F5H5N1;A0A087WXF6;A0A087WTI3;F5GXJ1;O75251-2;O75251	F5H5N1;A0A087WXF6;A0A087WTI3;F5GXJ1;O75251-2;O75251	NADH dehydrogenase [ubiquinone] iron-sulfur protein 7, mitochondrial	NDUFS7
1.30912	1.01486	NaN	NaN	NaN	2.13708			3	3	3	34.2	34.2	34.2	14.026	14.284	133130000	34749000	98378000	1.05729	1.06199	0	2.03708	O95168-2;O95168;F2Z3P9;C9JXQ9	O95168-2;O95168	NADH dehydrogenase [ubiquinone] 1 beta subcomplex subunit 4	NDUFB4
NaN	1.1586	NaN	NaN	NaN	NaN			4	4	4	29.7	29.7	29.7	24.758	26.955	140230000	12592000	127640000	0	1.0586	0	NaN	P20337	P20337	Ras-related protein Rab-3B	RAB3B
1.14991	NaN	NaN	NaN	0.672018	NaN			2	2	2	16.7	16.7	16.7	15.365	4.6664	244020000	80500000	163520000	0	1.04991	0	0.572018	E9PPC8;E9PK68;E7ETC2;Q5F2F8;Q08209-5;Q08209-3;Q08209-2;P16298-2;P16298-3;Q08209;P16298;P16298-4;H0YB02;G3V111;P48454-2;P48454;P48454-3	E9PPC8;E9PK68;E7ETC2;Q5F2F8;Q08209-5;Q08209-3;Q08209-2;P16298-2;P16298-3;Q08209;P16298;P16298-4;H0YB02;G3V111;P48454-2;P48454;P48454-3	Serine/threonine-protein phosphatase;Serine/threonine-protein phosphatase 2B catalytic subunit alpha isoform;Serine/threonine-protein phosphatase 2B catalytic subunit beta isoform;Serine/threonine-protein phosphatase 2B catalytic subunit gamma isoform	PPP3CA;PPP3CB;PPP3CC
NaN	NaN	1.14496	3.79129	3.52406	3.81486		+	7	7	7	42.4	42.4	42.4	29.44	26.833	389940000	33842000	356100000	0	1.04496	3.17615	3.61007	K7ELJ7;A0A0C4DGQ5;P04632;K7EKD8;U3KQE2;K7EM73;K7EIV0;A0A075B7C0;U3KPR7;K7ES78;K7EMQ1;Q96L46	K7ELJ7;A0A0C4DGQ5;P04632;K7EKD8;U3KQE2;K7EM73;K7EIV0;A0A075B7C0	Calpain small subunit 1	CAPNS1
NaN	NaN	1.13639	NaN	NaN	NaN			1	1	1	1.6	1.6	1.6	68.117	2.2542	65712000	16334000	49378000	0	1.03639	0	NaN	Q8IXI1	Q8IXI1	Mitochondrial Rho GTPase 2	RHOT2
1.1169	NaN	NaN	1.59273	1.0285	NaN			2	2	2	16.3	16.3	16.3	14.395	2.5401	1351500000	375730000	975730000	0	1.0169	0.83638	1.21062	Q9NZJ9-3;Q9NZJ9-2;F8VRL4;F8VRR0;A0A0C4DGJ4;Q96G61;Q8NFP7;Q9NZJ9	Q9NZJ9-3;Q9NZJ9-2;F8VRL4;F8VRR0;A0A0C4DGJ4;Q96G61;Q8NFP7;Q9NZJ9	Diphosphoinositol polyphosphate phosphohydrolase 2;Diphosphoinositol polyphosphate phosphohydrolase 3-beta;Diphosphoinositol polyphosphate phosphohydrolase 3-alpha	NUDT4;NUDT11;NUDT10
1.11463	NaN	NaN	NaN	NaN	NaN			2	2	2	2.6	2.6	2.6	72.688	4.9068	78347000	29200000	49147000	0	1.01463	0	NaN	A0A5E8;Q99501-3;Q99501-2;Q99501-4;Q99501	A0A5E8;Q99501-3;Q99501-2;Q99501-4;Q99501	GAS2-like protein 1	GAS2L1
NaN	NaN	1.11303	NaN	NaN	NaN			24	4	3	59.3	13.5	10.8	49.953	13.96	791000000	172470000	618530000	0	1.01303	0	NaN	Q9BVA1;Q13885	Q9BVA1;Q13885	Tubulin beta-2B chain;Tubulin beta-2A chain	TUBB2B;TUBB2A
1.31701	1.75818	0.20364	NaN	NaN	NaN			13	13	13	23.5	23.5	23.5	80.419	43.386	1740700000	411500000	1329200000	0.782736	0.992943	0	NaN	O95573;F5GWH2;F5H062;O60488-2;O60488	O95573	Long-chain-fatty-acid--CoA ligase 3	ACSL3
NaN	1.08821	NaN	NaN	NaN	NaN			2	2	2	15	15	15	13.891	2.8221	30223000	8130300	22092000	0	0.98821	0	NaN	Q9Y5J5	Q9Y5J5	Pleckstrin homology-like domain family A member 3	PHLDA3
1.05026	NaN	1.12585	1.00798	NaN	1.05575			10	1	1	24.3	7.2	7.2	49.775	73.756	2640700000	781760000	1858900000	1.61367	0.988054	1.78748	0.931868	Q3ZCM7;A0A075B736;Q5SQY0	Q3ZCM7;A0A075B736;Q5SQY0	Tubulin beta-8 chain	TUBB8
1.23787	1.02233	1.00339	NaN	NaN	0.737773	+		3	3	3	25.4	25.4	25.4	15.578	9.7515	173060000	51477000	121590000	2.24068	0.987863	0	0.637773	Q7Z5G4-3;Q7Z5G4	Q7Z5G4-3;Q7Z5G4	Golgin subfamily A member 7	GOLGA7
0.866473	1.06046	1.33319	1.68433	1.36916	1.24847			3	3	3	26.8	26.8	26.8	9.9062	4.7753	427090000	134870000	292220000	1.7374	0.98671	2.02903	1.33399	O14949	O14949	Cytochrome b-c1 complex subunit 8	UQCRQ
0.0291349	2.14235	NaN	NaN	NaN	2.7642			2	2	2	36.8	36.8	36.8	7.7412	4.7992	139050000	111090000	27968000	0.282263	0.985741	0	2.6642	P60059	P60059	Protein transport protein Sec61 subunit gamma	SEC61G
1.10742	1.03436	1.10575	0.191689	0.219835	0.0585243	+		24	24	23	75.6	75.6	75.6	39.594	323.31	151830000000	59888000000	91941000000	3.22174	0.982507	0.428747	0.0566826	Q9NYL9;H0YNJ8;H0YKU1;H0YNU8;G5EA42;Q9NZR1	Q9NYL9;H0YNJ8;H0YKU1	Tropomodulin-3	TMOD3
0.968423	1.03949	1.21686	1.27846	1.28582	1.34857	+	+	15	15	15	61.8	61.8	61.8	36.053	221.5	18073000000	5981900000	12091000000	2.24469	0.974923	3.46717	1.20428	P04406;P04406-2;E7EUT5;O14556	P04406;P04406-2;E7EUT5	Glyceraldehyde-3-phosphate dehydrogenase	GAPDH
1.17447	0.9855	1.05624	1.27352	1.34244	1.39468	+	+	11	11	11	38.7	38.7	38.7	42.509	55.217	1593400000	448470000	1145000000	2.49483	0.972069	3.09488	1.23688	Q16795;F5H0J3;F5GY40;H3BRM9	Q16795	NADH dehydrogenase [ubiquinone] 1 alpha subcomplex subunit 9, mitochondrial	NDUFA9
0.934026	1.29907	0.98251	0.830823	0.84318	0.796681		+	14	14	14	48.4	48.4	48.4	52.253	192.05	4048100000	1603000000	2445100000	1.86684	0.971868	3.43281	0.723561	Q13137;Q13137-3;Q13137-4;Q13137-2;Q13137-5;D6REB0;D6RF70;I3L493;D6RBI4;D6RJE7;I3L4E1;H0Y9G3;H0YBP4	Q13137;Q13137-3;Q13137-4;Q13137-2;Q13137-5;D6REB0	Calcium-binding and coiled-coil domain-containing protein 2	CALCOCO2
1.1846	0.95836	NaN	NaN	NaN	NaN			3	3	3	6.4	6.4	6.4	77.328	15.983	75202000	16089000	59113000	1.13197	0.971479	0	NaN	P21980	P21980	Protein-glutamine gamma-glutamyltransferase 2	TGM2
1.06509	0.995376	1.13343	1.12697	1.16806	0.957023	+	+	10	10	10	48.3	48.3	48.3	20.546	57.826	15106000000	4225900000	10880000000	2.76889	0.964633	2.36838	0.98402	O15145;C9JZD1;F8VR50	O15145;C9JZD1	Actin-related protein 2/3 complex subunit 3	ARPC3
1.10936	1.05991	1.01643	0.0951818	0.0852886	-0.613145	+		9	9	9	61.2	61.2	61.2	21.225	46.03	10009000000	3525000000	6484500000	3.10899	0.961898	0.390428	-0.244225	P02794;G3V1D1;G3V192;E9PPQ4;E9PRK8;E9PKY7;E9PQR3;E9PKM5;E9PK45	P02794;G3V1D1;G3V192	Ferritin heavy chain;Ferritin heavy chain, N-terminally processed;Ferritin	FTH1
1.14789	1.03005	1.00576	1.12439	1.04705	0.595217	+		4	4	4	39.7	39.7	39.7	7.3184	11.434	653440000	234690000	418750000	2.68223	0.961235	1.42023	0.82222	P63218	P63218	Guanine nucleotide-binding protein G(I)/G(S)/G(O) subunit gamma-5	GNG5
1.09464	0.986229	1.09896	0.254352	0.167486	0.27453	+		10	7	7	42.7	36.7	36.7	39.548	118.17	1478800000	466010000	1012800000	2.83191	0.959943	1.24731	0.132123	Q6IBS0;D6RG15;H0Y858;F8W645;H7C5I2;Q9NR96-4	Q6IBS0;D6RG15	Twinfilin-2	TWF2
0.731531	1.1273	1.32054	1.24738	0.992841	1.13245		+	6	6	6	15.7	15.7	15.7	57.563	30.631	1423800000	491070000	932690000	1.50714	0.959792	2.29045	1.02422	Q9Y285;K7ER00;Q9Y285-2;K7ER16;K7EPH2;K7EK06;K7ERS0	Q9Y285;K7ER00;Q9Y285-2;K7ER16;K7EPH2	Phenylalanine--tRNA ligase alpha subunit	FARSA
1.05852	NaN	NaN	NaN	NaN	NaN			5	5	5	34.2	34.2	34.2	25.072	29.159	132080000	89033000	43047000	0	0.958524	0	NaN	Q5TDF0;Q9BSD7	Q5TDF0;Q9BSD7	Cancer-related nucleoside-triphosphatase	NTPCR
0.939076	1.05464	1.17581	1.03062	0.995521	0.653794	+		13	13	13	64.6	64.6	64.6	28.994	117.72	13312000000	5177400000	8134600000	2.29526	0.956509	1.65382	0.793311	P50402;Q5HY57;F8WEQ1	P50402;Q5HY57	Emerin	EMD
1.04376	1.04712	1.06895	1.01963	1.05415	1.01478	+	+	23	23	23	68.2	68.2	68.2	47.371	313.31	48758000000	18362000000	30395000000	4.16386	0.953277	3.75016	0.929523	P61158;B4DXW1;F8WDR7;Q9P1U1-2;Q9P1U1;Q9P1U1-3;A0A0A0MTI9;H7C4J1;C9IZN3;Q9C0K3;F8WEW2;F8WE84	P61158;B4DXW1	Actin-related protein 3	ACTR3
0.874522	0.93138	1.34432	2.29593	2.74644	2.52201		+	14	14	14	28.8	28.8	28.8	66.69	61.582	1724000000	336280000	1387700000	1.63026	0.950073	2.54179	2.42146	P17812;P17812-2;Q9NRF8	P17812;P17812-2	CTP synthase 1	CTPS1
0.860685	1.07977	1.19055	1.12644	1.12671	1.03759		+	24	5	4	65.5	20.2	16.7	47.766	119.64	21896000000	7442000000	14454000000	1.98362	0.943669	3.05351	0.996915	Q5JP53;P07437;Q5ST81	Q5JP53;P07437;Q5ST81	Tubulin beta chain	TUBB
1.00834	1.10105	1.01906	1.84294	2.01289	1.64242	+	+	16	16	16	50	50	50	50.957	200.12	8287300000	2377800000	5909500000	3.01639	0.942817	2.42065	1.73275	H0Y4R1;P12268;E7ETK5	H0Y4R1;P12268	Inosine-5-monophosphate dehydrogenase 2	IMPDH2
1.31441	0.976657	0.835843	2.74242	2.98101	2.77032		+	11	11	3	50.3	50.3	8.9	32.642	31.329	1863700000	456820000	1406900000	1.65833	0.942302	3.11947	2.73125	Q32Q12;P22392-2;J3KPD9;P22392;O60361;F6XY72	Q32Q12;P22392-2;J3KPD9;P22392	Nucleoside diphosphate kinase;Nucleoside diphosphate kinase B	NME1-NME2;NME2
0.987175	1.07087	1.06633	0.661841	1.00863	0.855272	+		11	8	7	47.8	36.7	33.9	27.764	101.68	4825200000	1660200000	3165000000	3.07986	0.941459	1.74955	0.741914	P27348;E9PG15	P27348;E9PG15	14-3-3 protein theta	YWHAQ
NaN	0.82326	1.25641	NaN	NaN	-0.342451			2	2	2	15	15	15	15.865	9.2995	58994000	22030000	36964000	0.841082	0.939834	0	-0.442451	Q96E14;I3L2E0	Q96E14;I3L2E0	RecQ-mediated genome instability protein 2	RMI2
0.947554	0.641269	1.52632	NaN	NaN	1.77151			3	3	3	10.3	10.3	10.3	37.514	7.5186	178670000	43348000	135320000	1.16313	0.938381	0	1.67151	P11177-3;P11177-2;P11177;F8WF02;C9J634	P11177-3;P11177-2;P11177	Pyruvate dehydrogenase E1 component subunit beta, mitochondrial	PDHB
1.03794	1.02574	1.03914	0.429321	0.307312	0.145612	+		35	35	2	42.5	42.5	2.2	80.657	323.31	52744000000	18676000000	34068000000	4.6777	0.934273	0.84764	0.194082	Q0ZGT2;Q0ZGT2-4;Q0ZGT2-3	Q0ZGT2;Q0ZGT2-4;Q0ZGT2-3	Nexilin	NEXN
1.06915	0.954866	1.07738	1.67785	1.43771	1.48378	+	+	7	7	7	23.8	23.8	23.8	34.012	20.193	2253800000	875170000	1378600000	2.74765	0.933799	2.58075	1.43311	P53007;B4DP62	P53007;B4DP62	Tricarboxylate transport protein, mitochondrial	SLC25A1
1.11116	0.947704	1.03337	0.960215	1.15672	1.04956	+	+	16	16	16	45.9	45.9	45.9	44.76	160.3	24143000000	9224400000	14919000000	2.59135	0.930746	2.454	0.955499	P61160;P61160-2;F5H6T1	P61160;P61160-2;F5H6T1	Actin-related protein 2	ACTR2
0.990447	1.1445	0.956726	1.14945	1.22731	1.20683	+	+	5	5	3	29.1	29.1	15.8	23.294	33.718	1810200000	626370000	1183800000	2.41617	0.930559	3.344	1.09453	A0A0C4DGH2;P62070;P62070-4;E9PK85;P62070-3;P62070-2;E9PQK5;E9PQC5;E9PQ87	A0A0C4DGH2;P62070;P62070-4;E9PK85;P62070-3;P62070-2	Ras-related protein R-Ras2	RRAS2
0.923796	1.05776	1.10662	1.50416	1.53162	1.64446	+	+	9	9	9	12.1	12.1	12.1	110.61	61.729	1195700000	479080000	716660000	2.46348	0.929391	3.06386	1.46008	F5H2F4;P11586;V9GYY3	F5H2F4;P11586	C-1-tetrahydrofolate synthase, cytoplasmic;Methylenetetrahydrofolate dehydrogenase;Methenyltetrahydrofolate cyclohydrolase;Formyltetrahydrofolate synthetase;C-1-tetrahydrofolate synthase, cytoplasmic, N-terminally processed	MTHFD1
1.06468	1.01927	0.999206	1.23854	1.06963	0.756511	+		8	8	8	71.9	71.9	71.9	14.716	55.892	1994700000	655680000	1339000000	3.36107	0.927719	1.64429	0.921562	P09382;F8WEI7	P09382	Galectin-1	LGALS1
1.01042	0.955015	1.09457	1.08997	1.17645	1.1973	+	+	8	8	8	44.8	44.8	44.8	21.058	63.022	13414000000	4014900000	9399000000	2.71241	0.920004	3.01354	1.05457	F8WCF6;P59998;F8WDD7;A0A0A6YYG9;P59998-3;P59998-2;H7C0A3;F8WE39;F8WDW3;R4GN08;P59998-4	F8WCF6;P59998;F8WDD7;A0A0A6YYG9;P59998-3;P59998-2;H7C0A3	Actin-related protein 2/3 complex subunit 4	ARPC4-TTLL3;ARPC4
1.07307	0.872474	1.1129	0.487075	0.588805	0.407625	+		17	17	11	80.7	80.7	53	18.502	123.97	22931000000	9406500000	13524000000	2.18821	0.91948	1.7642	0.394501	P23528;E9PP50;E9PK25;G3V1A4;E9PQB7;E9PS23;E9PLJ3	P23528;E9PP50;E9PK25;G3V1A4;E9PQB7;E9PS23	Cofilin-1	CFL1
1.02063	1.04684	0.987685	1.22903	0.930851	0.945982	+		12	11	11	24.6	23.2	23.2	66.408	59.998	2233600000	704200000	1529400000	3.4596	0.918384	1.97554	0.935289	P20700;E9PBF6;A0A0D9SFE5;A0A0D9SFY5	P20700;E9PBF6;A0A0D9SFE5	Lamin-B1	LMNB1
NaN	1.012	NaN	NaN	NaN	NaN			2	2	2	16	16	16	19.015	4.0716	38846000	6809200	32037000	0	0.911997	0	NaN	Q13232;H3BPR2	Q13232;H3BPR2	Nucleoside diphosphate kinase 3;Nucleoside diphosphate kinase	NME3
1.02928	NaN	0.98652	NaN	NaN	2.66373			3	3	3	24	24	24	16.648	10.043	73347000	17709000	55639000	1.82427	0.907898	0	2.56373	Q9UHV9	Q9UHV9	Prefoldin subunit 2	PFDN2
1.00741	NaN	NaN	NaN	NaN	0.931607			3	3	3	13.7	13.7	13.7	25.938	6.592	148660000	52770000	95886000	0	0.907411	0	0.831607	Q9HAC8;Q8WUN7	Q9HAC8;Q8WUN7	Ubiquitin domain-containing protein 1;Ubiquitin domain-containing protein 2	UBTD1;UBTD2
0.984699	0.98156	1.04572	0.224164	0.332278	0.169797	+		44	44	0	98.9	98.9	0	41.792	323.31	7386000000000	3019100000000	4366900000000	3.27305	0.903994	1.01399	0.14208	P63261;I3L3I0;I3L1U9;I3L3R2;J3KT65;C9JUM1;F8WCH0	P63261;I3L3I0;I3L1U9	Actin, cytoplasmic 2;Actin, cytoplasmic 2, N-terminally processed	ACTG1
1.00238	NaN	NaN	NaN	NaN	0.655627			3	3	3	29.2	29.2	29.2	18.469	37.37	132610000	48879000	83727000	0	0.902378	0	0.555627	E9PQR7;E9PM90;Q9UK41;Q9UK41-2;E9PR04;E9PLM9	E9PQR7;E9PM90;Q9UK41;Q9UK41-2;E9PR04	Vacuolar protein sorting-associated protein 28 homolog	VPS28
0.948302	0.920979	1.13626	0.726918	0.818932	0.804549	+	+	21	21	21	62.8	62.8	62.8	50.184	252.93	129460000000	46482000000	82980000000	2.25316	0.901846	2.75853	0.683467	Q5VTE0;P68104;A0A087WVQ9;P68104-2;A0A087WV01;Q05639;Q5JR01;A6PW80	Q5VTE0;P68104;A0A087WVQ9;P68104-2;A0A087WV01	Putative elongation factor 1-alpha-like 3;Elongation factor 1-alpha 1;Elongation factor 1-alpha	EEF1A1P5;EEF1A1
0.996967	0.848958	1.15795	1.05506	1.15627	1.1375		+	20	20	20	61.3	61.3	61.3	34.333	163.68	21992000000	7890900000	14101000000	2.01509	0.901292	3.02953	1.01628	O15144;H7C3F9;C9JTV5;G5E9J0;G5E9S7	O15144	Actin-related protein 2/3 complex subunit 2	ARPC2
0.820485	0.759582	1.41862	1.65924	1.39813	1.68572		+	18	18	18	39.7	39.7	39.7	59.67	210.88	2540600000	1269400000	1271200000	1.29645	0.899563	2.41824	1.48103	P48643;E7ENZ3;B7ZAR1;E9PCA1;P48643-2;D6RIZ7;H0Y914	P48643;E7ENZ3;B7ZAR1;E9PCA1;P48643-2	T-complex protein 1 subunit epsilon	CCT5
1.09207	0.706641	1.18498	NaN	NaN	-0.12279			3	3	3	16	16	16	23.567	9.9114	589610000	192830000	396780000	1.58896	0.894564	0	-0.22279	P11233;H7C3P7;P11234;P11234-3;P11234-2;F8WEQ6;C9JPE8;C9JYR1;C9J6B1;C9JQB3	P11233;H7C3P7;P11234;P11234-3;P11234-2	Ras-related protein Ral-A;Ras-related protein Ral-B	RALA;RALB
0.985136	0.954494	1.03154	0.29678	0.367371	0.168	+		44	2	2	98.9	4.8	4.8	41.736	69.827	109320000000	45482000000	63836000000	3.19928	0.890389	1.02989	0.177384	P60709;E7EVS6;G5E9R0;C9JZR7;C9JTX5	P60709	Actin, cytoplasmic 1;Actin, cytoplasmic 1, N-terminally processed	ACTB
0.593688	1.28517	1.08481	2.73924	2.02375	1.08379			4	4	4	8	8	8	60.13	7.4034	561000000	216130000	344870000	1.30473	0.887889	1.21383	1.84893	O75131;A0A087WUS8;A0A087WXR6;E5RHZ0;A0A087WYQ3;E7ENV7;Q86YQ8-2;Q9HCH3-2;Q96FN4-2;Q96FN4;Q8IYJ1;Q96A23;O95741;Q9UBL6-2;Q86YQ8;Q96A23-2;Q9HCH3;O95741-2;Q9UBL6	O75131	Copine-3	CPNE3
0.983094	NaN	NaN	NaN	NaN	1.81562			3	2	2	22.5	16.8	16.8	21.308	8.7784	21509000	5660100	15849000	0	0.883094	0	1.71562	P84095	P84095	Rho-related GTP-binding protein RhoG	RHOG
1.00734	0.916629	1.00899	-0.341592	-0.0497705	-0.308144	+		11	11	11	56.2	56.2	56.2	36.567	317.41	10388000000	4992700000	5394900000	2.9184	0.877652	1.16251	-0.333169	Q96IZ0;H0YHP5;H0YI16;A0A0B4J260;F8W1M8	Q96IZ0	PRKC apoptosis WT1 regulator protein	PAWR
0.849519	0.660198	1.41857	4.31034	4.98864	4.70194		+	21	21	21	41.3	41.3	41.3	80.521	129.92	4350500000	1065800000	3284700000	1.21122	0.876095	2.73335	4.56697	F8W7U8;P49959;P49959-2;P49959-3;F5GXT0;F5H742;F5H256	F8W7U8;P49959;P49959-2;P49959-3	Double-strand break repair protein MRE11A	MRE11A
1.18859	0.763582	NaN	NaN	NaN	NaN			3	3	3	15.1	15.1	15.1	28.214	21.947	1724100000	911000000	813090000	0.819606	0.876086	0	NaN	E5RGS2;Q9H6H4;Q9H6H4-2	E5RGS2;Q9H6H4	Receptor expression-enhancing protein;Receptor expression-enhancing protein 4	REEP4
0.950618	0.940129	1.03415	2.92977	2.71556	2.72539	+	+	20	20	16	75.9	75.9	60.8	22.11	196.36	145750000000	32034000000	113720000000	2.9379	0.874964	3.17203	2.69024	Q06830;A0A0A0MSI0;A0A0A0MRQ5	Q06830;A0A0A0MSI0	Peroxiredoxin-1	PRDX1
1.20714	0.736129	0.953004	NaN	0.833902	0.0142124			4	4	2	26.8	26.8	15.3	20.504	9.4721	305020000	110360000	194660000	1.62243	0.865425	0.241028	0.324057	P61225	P61225	Ras-related protein Rap-2b	RAP2B
0.965101	NaN	NaN	NaN	NaN	NaN			3	3	3	5.5	5.5	5.5	93.307	7.6265	513720000	251370000	262350000	0	0.865101	0	NaN	P45974-2;P45974;F5H571	P45974-2;P45974	Ubiquitin carboxyl-terminal hydrolase 5	USP5
0.846794	0.934328	1.11317	1.7566	1.63241	1.84687		+	20	20	20	42.9	42.9	42.9	59.62	60.383	4128400000	1332000000	2796400000	2.09062	0.864763	2.84627	1.64529	P50990;P50990-2;P50990-3;H7C4C8;H7C2U0	P50990;P50990-2;P50990-3;H7C4C8	T-complex protein 1 subunit theta	CCT8
0.810813	1.02899	1.05179	1.83786	1.94084	1.81824		+	33	33	33	67.4	67.4	67.4	61.054	323.31	17802000000	6329800000	11473000000	2.10719	0.863865	3.33403	1.76565	P10809;E7ESH4;E7EXB4;P10809-2;C9JL25;C9JL19;C9JCQ4;C9J0S9	P10809	60 kDa heat shock protein, mitochondrial	HSPD1
1.20188	1.0937	0.595886	NaN	NaN	0.918005			3	3	3	13.1	13.1	13.1	30.281	13.059	251530000	75622000	175910000	1.36019	0.863822	0	0.818005	Q9H0E2;F2Z2Y8;E7EN89;E9PNS3;E9PP67;E9PQ25;Q9H0E2-2	Q9H0E2;F2Z2Y8;E7EN89	Toll-interacting protein	TOLLIP
0.955834	0.761541	1.16883	0.728574	1.16266	0.649845			3	3	3	15.1	15.1	15.1	34.352	9.6699	326230000	119230000	207000000	1.74207	0.86207	1.36995	0.747027	Q12904;Q12904-2;D6R937	Q12904;Q12904-2	Aminoacyl tRNA synthase complex-interacting multifunctional protein 1;Endothelial monocyte-activating polypeptide 2	AIMP1
0.843421	1.00137	1.03731	1.06046	1.03569	0.718088	+		5	5	5	27.1	27.1	27.1	36.876	44.356	893280000	286780000	606500000	2.32303	0.860701	1.77307	0.838081	Q14257;Q14257-2;A8MXP8;H0YL43	Q14257;Q14257-2;A8MXP8	Reticulocalbin-2	RCN2
0.777283	1.1277	NaN	NaN	NaN	NaN			3	3	3	19	19	19	32.363	12.176	404550000	69656000	334900000	0.889261	0.852491	0	NaN	P10909-3;P10909-4;P10909;P10909-5;P10909-2;H0YAS8;H0YC35;E7ERK6;H0YLK8	P10909-3;P10909-4;P10909;P10909-5;P10909-2;H0YAS8;H0YC35	Clusterin;Clusterin beta chain;Clusterin alpha chain;Clusterin	CLU
NaN	NaN	0.950543	NaN	NaN	NaN			2	2	2	2.7	2.7	2.7	118.82	4.9133	32488000	10331000	22157000	0	0.850543	0	NaN	I3L2C7;P57678	I3L2C7;P57678	Gem-associated protein 4	GEMIN4
NaN	NaN	0.949871	NaN	NaN	NaN			1	1	1	5.4	5.4	5.4	23.413	2.2416	1576400000	420930000	1155500000	0	0.849871	0	NaN	H7C0Q6;Q9C037-3;Q9C037-2;Q9C037	H7C0Q6;Q9C037-3;Q9C037-2;Q9C037	E3 ubiquitin-protein ligase TRIM4	TRIM4
0.968496	0.867738	1.00231	NaN	NaN	NaN	+		5	5	5	24.9	24.9	24.9	26.797	15.633	152990000	46936000	106050000	2.64328	0.84618	0	NaN	H0Y4Q3;P46060	H0Y4Q3;P46060	Ran GTPase-activating protein 1	RANGAP1
0.834469	1.01407	0.981926	3.52795	3.62796	3.77273	+	+	17	17	17	47.3	47.3	47.3	47.079	101.15	6186800000	681880000	5504900000	2.36959	0.843488	3.39577	3.54288	P22234;E9PBS1;P22234-2;D6RF62	P22234;E9PBS1;P22234-2;D6RF62	Multifunctional protein ADE2;Phosphoribosylaminoimidazole-succinocarboxamide synthase;Phosphoribosylaminoimidazole carboxylase	PAICS
1.06371	0.82122	NaN	NaN	-0.0489345	-1.56			4	4	3	30.1	30.1	21.3	20.811	28.511	446630000	241420000	205220000	1.04098	0.842465	0.353562	-0.90447	Q13185;C9JMM0;B8ZZ43;S4R2Y4	Q13185	Chromobox protein homolog 3	CBX3
0.679154	1.00425	1.14398	NaN	1.57749	NaN			4	4	4	7.2	7.2	7.2	83.165	25.993	260460000	65146000	195310000	1.59026	0.842461	0	1.47749	P41250	P41250	Glycine--tRNA ligase	GARS
NaN	0.939678	NaN	NaN	NaN	NaN			13	2	0	13.3	4.3	0	121.36	14.499	236100000	66140000	169960000	0	0.839678	0	NaN	Q6S8J3;Q9BYX7	Q6S8J3	POTE ankyrin domain family member E	POTEE
0.869398	0.939527	0.993058	1.52662	1.33971	1.41884	+	+	15	15	10	40.6	40.6	26	55.674	73.724	4775200000	1615600000	3159700000	2.73564	0.833995	2.78025	1.32839	B4DUR8;P49368;P49368-2;E9PRC8;E9PQ35;Q5SZW8;Q5SZX9	B4DUR8;P49368;P49368-2	T-complex protein 1 subunit gamma	CCT3
NaN	0.93191	NaN	NaN	NaN	NaN			8	2	2	19.6	6.1	6.1	75.491	23.46	39426000	11393000	28033000	0	0.83191	0	NaN	P42166	P42166	Lamina-associated polypeptide 2, isoform alpha;Thymopoietin;Thymopentin	TMPO
1.01049	0.904426	0.879627	0.183963	0.286881	0.141433	+		28	5	5	48.8	15.4	15.4	42.019	161.59	485610000000	201040000000	284570000000	2.63426	0.831516	0.861848	0.104092	P68032;P63267;P68133;P62736;A6NL76;P63267-2;C9JFL5;F6UVQ4;F6QUT6;F8WB63;B8ZZJ2	P68032;P63267;P68133;P62736;A6NL76;P63267-2	Actin, alpha cardiac muscle 1;Actin, gamma-enteric smooth muscle;Actin, alpha skeletal muscle;Actin, aortic smooth muscle	ACTC1;ACTG2;ACTA1;ACTA2
1.14352	0.349252	1.29819	1.78182	1.87133	2.02237		+	6	6	6	23.5	23.5	23.5	45.745	43.057	1949100000	531620000	1417500000	0.97549	0.830322	2.81501	1.79184	O60884	O60884	DnaJ homolog subfamily A member 2	DNAJA2
0.942308	0.906429	0.940054	1.18466	1.13534	0.795933	+		9	9	8	69.3	69.3	64.1	16.941	85.624	3529500000	1190400000	2339000000	3.70877	0.829597	1.78182	0.938644	Q9BPX5	Q9BPX5	Actin-related protein 2/3 complex subunit 5-like protein	ARPC5L
1.05214	0.919607	0.814673	0.194844	0.397146	-0.224469	+		16	16	16	63	63	63	47.687	323.31	16506000000	7047500000	9458700000	2.16739	0.828806	0.0393454	0.0225068	Q13501;Q13501-2;E7EMC7;E9PFW8;E3W990;C9JRJ8;D6RBF1;C9J6J8	Q13501;Q13501-2;E7EMC7	Sequestosome-1	SQSTM1
NaN	0.92562	NaN	NaN	NaN	NaN			4	4	4	10.7	10.7	10.7	43.074	10.548	313410000	75760000	237650000	0	0.82562	0	NaN	H0Y8Z9;Q9H845	H0Y8Z9;Q9H845	Acyl-CoA dehydrogenase family member 9, mitochondrial	ACAD9
1.04187	NaN	0.789854	3.81424	3.64374	3.75403		+	6	6	6	23	23	23	35.716	62.144	647760000	87147000	560610000	1.01075	0.815864	3.7251	3.63734	P04818;P04818-2;P04818-3	P04818;P04818-2	Thymidylate synthase	TYMS
0.908429	0.842054	0.985355	0.563646	0.56179	0.633106	+	+	30	30	30	80.1	80.1	80.1	30.628	323.31	126930000000	52509000000	74425000000	2.58664	0.811946	2.63414	0.486181	P47756-2;B1AK87;B1AK88;P47756;B1AK85	P47756-2;B1AK87;B1AK88;P47756;B1AK85	F-actin-capping protein subunit beta	CAPZB
0.955982	0.974676	0.80149	1.77985	2.14623	2.73229	+		12	12	12	55.2	55.2	55.2	18.012	100.88	7323000000	4959200000	2363700000	2.3419	0.810716	1.7773	2.11946	P62937;F8WE65;C9J5S7;P62937-2;E5RIZ5;P0DN26;A0A0H2UH34;A0A0B4J2A2;A0A075B767;A0A075B759;Q9Y536;F5H284;P0DN37	P62937;F8WE65;C9J5S7;P62937-2	Peptidyl-prolyl cis-trans isomerase A;Peptidyl-prolyl cis-trans isomerase A, N-terminally processed;Peptidyl-prolyl cis-trans isomerase	PPIA
0.990229	0.943284	0.793022	NaN	0.0124972	-0.745866	+		8	8	8	50.9	50.9	50.9	20.019	18.306	1193200000	379700000	813450000	2.27055	0.808845	0.362134	-0.466684	P02792;A0A087X1B9	P02792;A0A087X1B9	Ferritin light chain;Ferritin	FTL
0.841007	0.799916	1.07724	0.196103	0.068602	-0.0605478			7	7	7	31.7	31.7	31.7	26.55	52.987	1039900000	430040000	609820000	1.94699	0.806055	0.149752	-0.0319475	Q9GZY6;C9JA24;Q9GZY6-2;C9JXP0;C9JDY7;F8W947	Q9GZY6;C9JA24;Q9GZY6-2;C9JXP0	Linker for activation of T-cells family member 2	LAT2
0.982364	0.860526	0.869477	1.03415	1.19472	1.38891	+		4	4	4	27.8	27.8	27.8	11.203	12.281	2421000000	778190000	1642800000	2.62548	0.804122	2.07102	1.10592	P60903	P60903	Protein S100-A10	S100A10
1.2345	0.941707	0.522558	1.10084	1.28848	1.10353		+	10	10	10	53.6	53.6	53.6	28.768	81.046	1397900000	509660000	888230000	1.21652	0.799589	2.47012	1.06428	P12004	P12004	Proliferating cell nuclear antigen	PCNA
1.08773	NaN	0.711319	NaN	NaN	NaN			2	2	2	1.5	1.5	1.5	127.14	2.4786	7506600000	3782000000	3724600000	0.832151	0.799527	0	NaN	Q5M9N0;Q5M9N0-3;Q5M9N0-2	Q5M9N0;Q5M9N0-3;Q5M9N0-2	Coiled-coil domain-containing protein 158	CCDC158
0.877037	0.971516	0.841571	0.874443	1.67586	0.972399	+		5	5	5	20.7	20.7	20.7	26.694	22.395	1344600000	451680000	892960000	2.62692	0.796708	1.29227	1.07423	C9JRZ6;Q9NX63;F8WAR4;F8WD73	C9JRZ6;Q9NX63;F8WAR4	MICOS complex subunit MIC19	CHCHD3
0.743558	1.01799	0.91892	1.02482	1.27041	1.21779		+	11	11	9	28.4	28.4	23	34.899	58.235	4262300000	1541400000	2720900000	1.99694	0.793491	2.3166	1.071	P43358;C9JZJ5;C9J9C2;C9JK50;C9JIR1;P43361;P43363;P43362;Q3SYA6;Q8TD91-2;A0A0A0MSA3;O60732-2;A2A368;A8MXT2;Q96M61;O15480;O60732	P43358	Melanoma-associated antigen 4	MAGEA4
0.74528	0.896078	1.03647	0.475085	0.266757	0.294547			7	7	7	30.6	30.6	30.6	35.398	22.35	1053500000	416610000	636860000	1.95602	0.792609	1.19343	0.245463	P50479;P50479-2;C9J542	P50479;P50479-2	PDZ and LIM domain protein 4	PDLIM4
NaN	0.900181	0.881351	NaN	NaN	NaN			3	3	3	6	6	6	90.854	10.215	115100000	24868000	90230000	2.12038	0.790766	0	NaN	V9H019;E9PHA6;P43246-2;P43246;A0A087X1E7;A0A087X078;V9H015;V9H0B2	V9H019;E9PHA6;P43246-2;P43246;A0A087X1E7;A0A087X078	DNA mismatch repair protein Msh2	MSH2
0.882995	0.794603	0.960363	0.507516	0.557582	0.583423	+	+	17	17	13	76.2	76.2	61.9	32.922	323.31	116240000000	45871000000	70366000000	2.42546	0.779321	2.61118	0.449507	P52907	P52907	F-actin-capping protein subunit alpha-1	CAPZA1
0.873971	0.701593	1.05866	1.52682	2.00364	2.1333			6	6	6	11.4	11.4	11.4	86.233	22.442	275290000	77783000	197510000	1.7668	0.778076	1.98009	1.78792	Q13618-2;Q13618;Q13618-3;H7C399;A0A087WTG3;H7C1L6	Q13618-2;Q13618;Q13618-3	Cullin-3	CUL3
0.903732	0.923263	0.797511	NaN	-1.24246	-1.009	+		4	4	4	33.1	33.1	33.1	17.218	27.56	592630000	256870000	335770000	2.59636	0.774836	1.21864	-1.22573	Q9H4G4;Q5VZR0;A0A088AWP7;A0A087WUM5	Q9H4G4;Q5VZR0	Golgi-associated plant pathogenesis-related protein 1	GLIPR2
0.904735	0.822363	0.888149	0.00374607	-0.0918327	-0.0200186	+		9	9	8	28.4	28.4	27	54.234	56.056	21149000000	9814000000	11335000000	2.97447	0.771749	1.37857	-0.136035	Q9BR76;A0A087WW53;F5H390;F5H0D2	Q9BR76	Coronin-1B	CORO1B
0.629753	NaN	1.10434	NaN	NaN	NaN			4	1	1	33	11	11	11.345	2.9677	79913000	29583000	50330000	0.718969	0.767045	0	NaN	H0YMV8;Q71UM5;C9J1C5;C9JLI6	H0YMV8;Q71UM5;C9J1C5;C9JLI6	40S ribosomal protein S27;40S ribosomal protein S27-like	RPS27L
0.808426	0.846393	0.945383	0.112633	0.158337	0.0643311	+		39	39	39	50.8	50.8	50.8	98.918	323.31	54802000000	21997000000	32806000000	2.54932	0.766734	0.150649	0.0117672	P53814-5;P53814-6;P53814;A0A087WVP4;A0A087X1R1;P53814-2;B5MCI0;A0A096LNK9;H7C372;H7BZZ8;C9JQZ8;C9JV14;C9JYU8;C9JGQ0;C9JBH9;C9JP19	P53814-5;P53814-6;P53814;A0A087WVP4;A0A087X1R1	Smoothelin	SMTN
NaN	NaN	0.866315	NaN	NaN	NaN			3	3	3	4.8	4.8	4.8	85.408	6.0916	44227000	14536000	29691000	0	0.766315	0	NaN	A0A0C4DGH5;Q86VP6-2;Q86VP6	A0A0C4DGH5;Q86VP6-2;Q86VP6	Cullin-associated NEDD8-dissociated protein 1	CAND1
0.874049	0.751464	0.971957	4.27008	4.38998	4.02919	+	+	38	38	2	55.2	55.2	3.1	92.115	323.31	19061000000	2081800000	16979000000	2.16333	0.765824	3.18096	4.12975	Q92598-2;Q92598;Q92598-3;R4GN69	Q92598-2;Q92598;Q92598-3	Heat shock protein 105 kDa	HSPH1
0.754716	0.826681	0.998918	1.93727	1.86849	1.99092		+	20	20	20	56	56	56	49.541	232.64	19278000000	5741400000	13536000000	2.04756	0.760105	3.42741	1.83223	P49411;H3BNU3	P49411	Elongation factor Tu, mitochondrial	TUFM
1.02404	0.775261	0.763242	0.00934718	0.316146	0.296193			10	10	9	53	53	50.4	44.626	136.51	5056200000	2023300000	3033000000	1.9043	0.75418	0.406292	0.107229	F5H4R6;P55209-2;P55209;F8VY35;F8VV59;F8W0J6;H0YIV4;F8W118;F8W543;B7Z9C2;H0YH88;H0YHC3;F8W020;F8VUX1;P55209-3;F8VXI6;F8VRJ2;F8VVB5;B7Z4K9	F5H4R6;P55209-2;P55209;F8VY35;F8VV59;F8W0J6;H0YIV4;F8W118;F8W543;B7Z9C2;H0YH88;H0YHC3;F8W020;F8VUX1;P55209-3;F8VXI6;F8VRJ2	Nucleosome assembly protein 1-like 1	NAP1L1
0.851119	NaN	NaN	NaN	NaN	NaN			2	2	2	11.4	11.4	11.4	22.433	4.0905	202930000	96076000	106850000	0	0.751119	0	NaN	Q9NVP2;K7ES22;K7ELW9;Q9Y294	Q9NVP2;K7ES22;K7ELW9;Q9Y294	Histone chaperone ASF1B;Histone chaperone ASF1A	ASF1B;ASF1A
0.826925	0.683382	1.03991	0.544782	0.419431	0.227864			10	10	4	32.2	32.2	21.5	46.158	63.509	4648300000	2174600000	2473700000	1.73195	0.750072	1.07522	0.297359	Q09028-3;Q09028;Q09028-2;Q09028-4;H0YF10;H0YCT5;H0YDK2;H0YEU5;Q5JP02;E9PNS2;E9PIC4;E9PNS6;C9JAJ9;Q5JNZ6	Q09028-3;Q09028;Q09028-2;Q09028-4;H0YF10;H0YCT5;H0YDK2	Histone-binding protein RBBP4	RBBP4
1.1137	0.563841	0.868134	NaN	3.5493	2.67972			9	1	1	57.9	9.2	9.2	17.149	8.2305	195840000	45119000	150720000	1.37373	0.748559	1.04004	3.01451	P15531;P15531-2;E7ERL0;E5RHP0;C9K028	P15531;P15531-2;E7ERL0;E5RHP0	Nucleoside diphosphate kinase A	NME1
NaN	NaN	0.846072	NaN	NaN	NaN			4	4	4	20.6	20.6	20.6	27.647	12.533	307710000	87068000	220650000	0	0.746072	0	NaN	P25788-2;P25788;G3V4X5;G3V3W4;G3V5N4	P25788-2;P25788;G3V4X5	Proteasome subunit alpha type-3	PSMA3
-0.0204721	NaN	1.69733	1.31156	0.915483	1.34608			3	3	3	11.1	11.1	11.1	27.889	6.2125	28814000000	7195000000	21619000000	0.26128	0.738428	1.80534	1.09104	A6NE76;K4DI93;Q13620-3;Q13620-1;Q13620;A0A0A0MR50;Q13619-2;Q13619;A0A087WWN2	A6NE76;K4DI93;Q13620-3;Q13620-1;Q13620;A0A0A0MR50;Q13619-2;Q13619	Cullin-4B;Cullin-4A	CUL4B;CUL4A
0.795268	0.942683	0.770279	0.173	0.31823	-0.257735	+		11	11	11	23.3	23.3	23.3	61.381	31.685	831340000	356250000	475090000	2.27592	0.736077	0.0410876	-0.0221685	I3L4C2;Q9UQB8-3;Q9UQB8-5;Q9UQB8-4;Q9UQB8-6;Q9UQB8-2;Q9UQB8;I3L2M4;B4DWA1;I3L327;I3L1C8;I3L125;I3L0M4;I3L3J7;I3L2J6;I3L113;I3L3C5;I3L526;I3L0Y9;I3L3C6;I3L4A3	I3L4C2;Q9UQB8-3;Q9UQB8-5;Q9UQB8-4;Q9UQB8-6;Q9UQB8-2;Q9UQB8;I3L2M4;B4DWA1	Brain-specific angiogenesis inhibitor 1-associated protein 2	BAIAP2
0.878608	1.08835	0.532068	-1.15107	-0.607946	-1.04928			5	5	5	22.5	22.5	22.5	34.984	62.898	3096000000	879110000	2216900000	1.34069	0.733007	1.60347	-1.0361	Q9P121-3;Q9P121-2;Q9P121;Q9P121-4;F6WFR7;F8W8Y1;H7BZ62;F8VTR5	Q9P121-3;Q9P121-2;Q9P121;Q9P121-4;F6WFR7;F8W8Y1	Neurotrimin	NTM
0.674732	1.36715	0.447315	-0.331935	NaN	-0.535478			5	5	5	23.1	23.1	23.1	32.85	86.157	1588400000	772640000	815730000	0.925729	0.729731	0.92098	-0.533707	F6X2W2;Q7Z3B1;Q7Z3B1-2	F6X2W2;Q7Z3B1	Neuronal growth regulator 1	NEGR1
0.74829	0.910502	NaN	NaN	NaN	NaN			3	3	3	25.6	25.6	25.6	13.865	9.4038	23305000	7093200	16212000	1.15181	0.729396	0	NaN	Q9H246	Q9H246	Uncharacterized protein C1orf21	C1orf21
0.737168	0.742092	0.994073	1.49667	1.27011	1.22132		+	30	30	30	47.3	47.3	47.3	78.973	224.3	10349000000	3456000000	6892700000	1.87177	0.724444	2.32537	1.22937	B9A067;Q16891-2;Q16891-4;Q16891;Q16891-3;C9J406;H7C463;A0A087WYS0;D6RAW4	B9A067;Q16891-2;Q16891-4;Q16891;Q16891-3;C9J406;H7C463	MICOS complex subunit MIC60	IMMT
0.834145	0.76103	0.876252	NaN	NaN	0.116764	+		12	5	5	50.9	24.7	24.7	37.567	33.98	899050000	366170000	532880000	2.66641	0.723809	0	0.016764	Q9HAV0;H7C5J5;C9JD14	Q9HAV0	Guanine nucleotide-binding protein subunit beta-4	GNB4
0.813607	0.686075	0.968791	1.48151	1.66998	1.6984		+	6	6	6	7.7	7.7	7.7	93.673	15.483	786800000	229210000	557600000	1.9014	0.722824	2.69732	1.51663	Q8TCJ2	Q8TCJ2	Dolichyl-diphosphooligosaccharide--protein glycosyltransferase subunit STT3B	STT3B
1.00755	0.798673	0.661294	0.913876	0.447315	0.917546			7	7	7	13.9	13.9	13.9	67.14	16.359	511310000	188090000	323220000	1.72436	0.722507	1.28628	0.659579	P54136-2;P54136	P54136-2;P54136	Arginine--tRNA ligase, cytoplasmic	RARS
0.574731	NaN	1.06963	NaN	NaN	1.52426			21	2	2	50.3	7.9	7.9	57.73	14.273	1222300000	395090000	827220000	0.677466	0.722182	0	1.42426	F5H5D3;Q9BQE3;F8VVB9;Q9H853	F5H5D3;Q9BQE3	Tubulin alpha-1C chain	TUBA1C
NaN	0.817951	NaN	2.97301	3.21168	2.89509		+	7	7	7	26.7	26.7	26.7	37.375	27.889	251390000	35671000	215720000	0	0.717951	2.97578	2.92659	Q9UJ70;Q9UJ70-2;C9JEV6;H7C3G9;H7C286;H0YF44;H7C1L7;H0YEB7;H0YE82	Q9UJ70;Q9UJ70-2;C9JEV6;H7C3G9;H7C286	N-acetyl-D-glucosamine kinase	NAGK
0.733528	0.821139	0.887447	0.379621	0.459117	0.0318186	+		34	34	33	57.4	57.4	56.2	74.139	244.69	26192000000	10396000000	15796000000	2.4118	0.714038	0.54633	0.190185	P02545;P02545-3;P02545-6;P02545-2;P02545-5;P02545-4;Q3BDU5;Q5TCI8;A0A0C4DGC5;H0YAB0	P02545;P02545-3;P02545-6;P02545-2;P02545-5;P02545-4;Q3BDU5;Q5TCI8	Prelamin-A/C;Lamin-A/C	LMNA
0.838427	0.762306	0.839879	0.85989	0.92235	0.723428	+	+	12	12	9	57.1	57.1	46.1	27.745	141.32	9788300000	3737200000	6051100000	2.89055	0.713538	2.1992	0.735223	P63104;E7EX29;E7ESK7;B0AZS6;P63104-2;E5RIR4;E9PD24;E7EVZ2;B7Z2E6;H0YB80;E5RGE1	P63104;E7EX29;E7ESK7;B0AZS6;P63104-2	14-3-3 protein zeta/delta	YWHAZ
0.0150693	1.25296	1.16806	NaN	NaN	NaN			10	10	10	8.1	8.1	8.1	170.59	28.129	277310000	89206000	188100000	0.664658	0.712031	0	NaN	P07814;V9GYZ6;V9GZ76	P07814;V9GYZ6	Bifunctional glutamate/proline--tRNA ligase;Glutamate--tRNA ligase;Proline--tRNA ligase	EPRS
0.750521	0.721241	0.957692	0.997545	1.10595	0.433387			10	10	10	36.8	36.8	36.8	34.93	135.28	5089900000	1975400000	3114500000	1.96602	0.709818	1.15451	0.745626	Q96AG4;I3L223	Q96AG4	Leucine-rich repeat-containing protein 59	LRRC59
0.747087	0.76545	0.91219	-0.612483	-0.412174	-0.660201	+		39	39	39	45.1	45.1	45.1	118.95	269.77	14130000000	4914900000	9215200000	2.26783	0.708242	1.88829	-0.661619	Q9UPQ0-10;Q9UPQ0-2;Q9UPQ0-4;Q9UPQ0;D6RD46;Q9UPQ0-8;H0Y8P3;G5EA03;Q9UPQ0-6;Q9UPQ0-5;Q9UPQ0-3;E7EPK0;E9PDJ9;Q9UPQ0-9;D6RJ93;D6R8Y0;Q6NVB9;Q9UPQ0-7;D6RGH8	Q9UPQ0-10;Q9UPQ0-2;Q9UPQ0-4;Q9UPQ0;D6RD46;Q9UPQ0-8;H0Y8P3;G5EA03;Q9UPQ0-6;Q9UPQ0-5;Q9UPQ0-3;E7EPK0;E9PDJ9;Q9UPQ0-9	LIM and calponin homology domains-containing protein 1	LIMCH1
NaN	0.80653	NaN	NaN	NaN	NaN			4	4	4	25.7	25.7	25.7	26.922	13.649	53800000	23957000	29843000	0	0.70653	0	NaN	O00299	O00299	Chloride intracellular channel protein 1	CLIC1
0.836651	0.679154	0.901495	0.498966	0.571531	0.617957		+	15	11	11	68.2	53.8	53.8	32.949	248.24	10146000000	4346500000	5799800000	2.06368	0.705766	2.25567	0.462818	P47755;F8W9N7;C9JUG7;A0A0D9SET8;P47755-2;F8WED3	P47755;F8W9N7	F-actin-capping protein subunit alpha-2	CAPZA2
0.765959	0.790105	0.857583	0.191563	0.293841	0.183201	+		25	25	7	79.1	79.1	26.1	37.512	323.31	70295000000	30085000000	40210000000	2.82074	0.704549	1.12754	0.122868	P62136;P62136-2;P62136-3;E9PMD7;F5H1L6;F5H037;F8W0V8	P62136;P62136-2;P62136-3;E9PMD7	Serine/threonine-protein phosphatase PP1-alpha catalytic subunit;Serine/threonine-protein phosphatase	PPP1CA
1.01806	0.671837	0.720804	NaN	0.511569	NaN			4	4	4	23.9	23.9	23.9	19.443	12.655	192800000	65719000	127080000	1.64143	0.703568	0	0.411569	Q01658	Q01658	Protein Dr1	DR1
0.8024	NaN	NaN	NaN	NaN	0.1133			3	3	3	12.9	12.9	12.9	27.278	10.518	426850000	163860000	262990000	0	0.7024	0	0.0133004	A2A2V1;P04156-2;P04156;X6RKS3	A2A2V1;P04156-2;P04156	Major prion protein	PRNP
0.939527	0.8062	0.658189	0.537048	1.00727	1.20845			8	8	7	31	31	28.3	34.081	20.65	2851600000	1091200000	1760400000	1.88078	0.701305	1.26426	0.81759	A0A024QZP7;P06493;E5RIU6;A0A087WZZ9;P06493-2;K7ELV5;E7ESI2;G3V5T9;P24941-2;P24941;Q00526;G3V317	A0A024QZP7;P06493;E5RIU6;A0A087WZZ9;P06493-2	Cyclin-dependent kinase 1	CDC2;CDK1
1.05596	NaN	0.546462	3.64674	3.3897	3.59395		+	15	15	15	56.2	56.2	56.2	40.968	154.82	4228900000	460600000	3768300000	0.653952	0.701211	3.28596	3.44346	P78406;E9PQ57;E9PPG9;B0QZ36;B0QZ37	P78406;E9PQ57;E9PPG9	mRNA export factor	RAE1
0.877116	0.716947	0.791022	1.55944	1.55979	1.6241	+	+	12	12	12	38	38	38	57.924	120.4	2926400000	1019900000	1906500000	2.35609	0.695028	3.6766	1.48111	P50991;P50991-2	P50991;P50991-2	T-complex protein 1 subunit delta	CCT4
0.794187	NaN	NaN	0.978269	NaN	1.08427			3	3	3	21.3	21.3	21.3	16.686	6.8505	106280000	37750000	68527000	0	0.694187	1.44139	0.931269	D6RBD7;C9J1V9;O43324-2;O43324;D6RCQ0;H0YAL7	D6RBD7;C9J1V9;O43324-2;O43324;D6RCQ0;H0YAL7	Eukaryotic translation elongation factor 1 epsilon-1	EEF1E1;EEF1E1-BLOC1S5
0.578697	0.871055	0.925392	1.28966	1.78881	1.54102			13	13	13	35.5	35.5	35.5	50.118	50.802	3244800000	1153000000	2091900000	1.63121	0.691715	2.00579	1.43983	P26641;P26641-2	P26641;P26641-2	Elongation factor 1-gamma	EEF1G
0.770449	0.791106	0.808673	0.215741	0.261591	0.11023	+		45	45	10	67	67	29.9	71.428	323.31	413840000000	166900000000	246940000000	3.59151	0.690076	0.78034	0.0958537	Q16643;Q16643-3;Q16643-2;D6R9Q9;D6RFI1;D6RCR4	Q16643;Q16643-3;Q16643-2	Drebrin	DBN1
0.744506	0.784337	0.818196	3.37365	3.21274	3.10802	+	+	40	35	21	77.1	71.5	42.8	70.108	323.31	48590000000	10043000000	38547000000	3.01205	0.682346	3.2161	3.13147	A0A0G2JIW1;P0DMV9;P0DMV8;P0DMV8-2;V9GZ37	A0A0G2JIW1;P0DMV9;P0DMV8;P0DMV8-2;V9GZ37	Heat shock 70 kDa protein 1B;Heat shock 70 kDa protein 1A	HSPA1B;HSPA1A
0.709202	0.793605	0.84149	1.1529	1.27548	1.10668	+	+	9	9	8	50	50	44.3	21.45	29.88	3447000000	1269600000	2177400000	2.49419	0.681432	2.66271	1.07835	P63000;P63000-2;P15153;P60763;B1AH77;B1AH78;B1AH80;J3KSC4;J3QLK0;F8WET9;B1AH79;G3V4H1;G3V476;A0A0C4DH03;Q9H4E5-2;P17081;Q9H4E5	P63000;P63000-2;P15153;P60763	Ras-related C3 botulinum toxin substrate 1;Ras-related C3 botulinum toxin substrate 2;Ras-related C3 botulinum toxin substrate 3	RAC1;RAC2;RAC3
0.642563	0.478713	1.21791	NaN	NaN	NaN			5	5	5	5	5	5	124.92	10.193	299650000	100800000	198850000	1.02825	0.67973	0	NaN	O95347-2;O95347;Q5T821;A0A0C4DGE5	O95347-2;O95347	Structural maintenance of chromosomes protein 2	SMC2
0.777199	0.720191	0.840282	-0.207461	-0.423391	-0.155325	+		22	22	21	42.1	42.1	41.1	86.082	183.75	5331700000	1969700000	3362000000	2.58551	0.679224	1.3213	-0.362059	Q96II8;Q96II8-2;Q96II8-3;Q96II8-4;E9PD99;F8WFB5;H7C1G3;H7C0J8;H7C0F9	Q96II8;Q96II8-2;Q96II8-3;Q96II8-4;E9PD99	Leucine-rich repeat and calponin homology domain-containing protein 3	LRCH3
1.00892	0.713256	0.601982	NaN	NaN	NaN			5	5	5	24.8	24.8	24.8	23.662	40.025	942150000	436910000	505250000	1.51012	0.674718	0	NaN	P09496-2;P09496-4;P09496-3;P09496;P09496-5;C9J8P9;F8WF69	P09496-2;P09496-4;P09496-3;P09496;P09496-5	Clathrin light chain A	CLTA
0.767146	0.655901	0.896078	1.56243	NaN	1.31562			5	5	5	43.8	43.8	43.8	17.031	34.556	234880000	111090000	123790000	1.98028	0.673042	1.23282	1.33902	P30044-2;P30044-3;P30044;P30044-4	P30044-2;P30044-3;P30044;P30044-4	Peroxiredoxin-5, mitochondrial	PRDX5
0.752834	0.7612	0.787767	2.88208	2.91884	2.87666	+	+	42	40	34	70.9	69.8	63	70.897	323.31	329880000000	71747000000	258140000000	3.60386	0.667267	4.64755	2.79253	P11142;E9PKE3;E9PNE6;P11142-2;A8K7Q2;E9PN89;E9PLF4;E9PQQ4;E9PQK7;E9PK54;E9PS65;P54652;E9PPY6;E9PM13;E9PN25;E9PI65	P11142;E9PKE3;E9PNE6;P11142-2;A8K7Q2;E9PN89	Heat shock cognate 71 kDa protein	HSPA8
0.703544	0.660564	0.924404	1.76129	1.84707	1.62985		+	3	3	3	46.4	46.4	46.4	7.8409	15.763	1930800000	677530000	1253200000	1.82781	0.662837	2.83285	1.64607	P62857	P62857	40S ribosomal protein S28	RPS28
0.76511	0.68419	0.83212	1.29031	1.22983	1.15393	+	+	30	30	30	69.6	69.6	69.6	38.604	323.31	198860000000	74078000000	124790000000	2.38022	0.660474	2.91075	1.12469	P07355;P07355-2;H0YN42;H0YMD0;H0YMU9;A6NMY6;H0YKS4;H0YM50;H0YNP5;H0YN28;H0YL33;H0YMM1;H0YKZ7;H0YLV6;H0YMT9;H0YKX9;H0YNA0;H0YKL9;H0YMW4;H0YN52;H0YKV8;H0YMD9;H0YNB8;H0YKN4;H0YLE2	P07355;P07355-2;H0YN42;H0YMD0;H0YMU9;A6NMY6;H0YKS4;H0YM50;H0YNP5;H0YN28;H0YL33	Annexin A2;Annexin;Putative annexin A2-like protein	ANXA2;ANXA2P2
0.757023	0.772983	0.747001	1.24908	1.17728	1.28131	+	+	9	9	9	37.3	37.3	37.3	32.426	63.756	2423400000	999700000	1423700000	3.88017	0.659002	3.13554	1.13589	Q5QPK2;H0Y368;O60762;Q5QPJ9	Q5QPK2;H0Y368;O60762	Dolichol-phosphate mannosyltransferase subunit 1	DPM1
0.668119	0.848398	NaN	NaN	NaN	0.399882			4	4	4	23.6	23.6	23.6	21.508	8.6551	179550000	65473000	114080000	1.0623	0.658258	0	0.299882	Q13951;J3KS23;Q13951-2;J3KRT0;H3BSC0	Q13951;J3KS23;Q13951-2;J3KRT0;H3BSC0	Core-binding factor subunit beta	CBFB
0.751892	0.742868	0.777872	0.564817	0.575022	0.538538	+	+	18	18	18	57.5	57.5	57.5	57.861	323.31	17417000000	7386700000	10031000000	3.59427	0.657544	3.25261	0.459459	P52292;J3QLL0;J3KS65	P52292	Importin subunit alpha-1	KPNA2
0.993421	0.518837	NaN	1.75493	NaN	NaN			7	3	3	18.9	9.4	9.4	56.298	21.987	376920000	111790000	265130000	0.655766	0.656129	0	1.65493	D6R938;E9PBG7;E9PF82;Q13557-8;Q13557-12;Q13557-9;Q13557-10;Q13557-5;Q13557;Q13557-3;Q13557-6;Q13557-4;Q13557-11;H0Y9C2;H0Y9J2	D6R938;E9PBG7;E9PF82;Q13557-8;Q13557-12;Q13557-9;Q13557-10;Q13557-5;Q13557;Q13557-3;Q13557-6;Q13557-4;Q13557-11	Calcium/calmodulin-dependent protein kinase type II subunit delta	CAMK2D
0.496923	0.735262	1.03344	NaN	NaN	NaN			5	5	5	17.3	17.3	17.3	48.407	25.633	492020000	237000000	255020000	1.28577	0.655208	0	NaN	H0Y9H2;E7EV99;E7ENY0;P35611-2;P35611-6;P35611;P35611-3;P35611-4;A0A0A0MSR2;P35611-5;H0YFD8	H0Y9H2;E7EV99;E7ENY0;P35611-2;P35611-6;P35611;P35611-3;P35611-4	Alpha-adducin	ADD1
0.379066	0.989502	0.896466	NaN	NaN	NaN			11	11	11	13.4	13.4	13.4	117.7	46.029	668540000	197300000	471240000	1.12646	0.655011	0	NaN	I3L2J8;Q9UPN4-3;Q9UPN4-2;Q9UPN4;I3L2X7;I3L316;I3L4M5	I3L2J8;Q9UPN4-3;Q9UPN4-2;Q9UPN4	Centrosomal protein of 131 kDa	CEP131
NaN	0.754289	NaN	NaN	NaN	-0.461641			3	3	3	12.7	12.7	12.7	44.385	17.437	662720000	329920000	332800000	0	0.654289	0	-0.561641	Q15427;Q5SZ64	Q15427	Splicing factor 3B subunit 4	SF3B4
0.54092	0.791689	0.92037	NaN	NaN	NaN			5	5	5	14.7	14.7	14.7	45.771	12.365	153540000	53769000	99767000	1.55188	0.650993	0	NaN	P14868-2;P14868;H7BZ35;C9J7S3;C9JLC1	P14868-2;P14868;H7BZ35	Aspartate--tRNA ligase, cytoplasmic	DARS
0.848558	0.550211	0.846794	NaN	0.30381	NaN			9	3	3	31.1	13.6	13.6	40.361	32.229	894000000	346720000	547280000	1.64612	0.648521	0	0.20381	P63096;P63096-2;C9JPP4;C9JL77	P63096;P63096-2	Guanine nucleotide-binding protein G(i) subunit alpha-1	GNAI1
0.725349	NaN	0.759241	-0.917652	1.78902	1.39199			4	3	3	34.8	29.6	29.6	15.397	11.275	267010000	95670000	171340000	1.77488	0.642295	0.284692	0.654452	F6RFD5;P60981;P60981-2	F6RFD5;P60981;P60981-2	Destrin	DSTN
1.12783	0.377513	0.720804	1.42449	1.38648	1.0049			7	7	7	37.2	37.2	37.2	28.821	37.162	1765900000	661690000	1104300000	1.0103	0.642049	1.89216	1.17196	E9PK01;A0A087X1X7;E9PRY8;P29692;P29692-2;P29692-3;E9PPR1;E9PL12;E9PQ49;E9PI39;E9PMW7;E9PIZ1;E9PL71;H0YCK7;E9PQZ1;P29692-4;E9PN91;E9PQC9;H0YE58;E9PK06;H0YE72;E9PKK3;E9PK72	E9PK01;A0A087X1X7;E9PRY8;P29692;P29692-2;P29692-3;E9PPR1;E9PL12;E9PQ49;E9PI39;E9PMW7;E9PIZ1;E9PL71;H0YCK7;E9PQZ1;P29692-4	Elongation factor 1-delta	EEF1D
0.814427	0.564037	0.835439	0.087327	0.130404	0.00446549			69	1	1	63	0.8	0.8	117.91	2.4503	2306100000	883600000	1422500000	1.74076	0.637968	0.255329	-0.0259346	O00159-2;I3L204;I3L4D4;I3L3Y6;I3L168;I3L3F5	O00159-2	Unconventional myosin-Ic	MYO1C
NaN	NaN	0.737514	NaN	NaN	NaN			3	3	3	5.4	5.4	5.4	88.118	6.2581	33483000	8831500	24652000	0	0.637514	0	NaN	Q6PJG6;Q6PJG6-3	Q6PJG6;Q6PJG6-3	BRCA1-associated ATM activator 1	BRAT1
0.733354	0.662479	0.810402	NaN	0.706022	0.835762	+		4	4	4	43.9	43.9	43.9	12.122	22.258	1037500000	369110000	668410000	2.3479	0.635412	1.21208	0.670892	Q9GZT3-2;Q9GZT3;A0A087WUN7;H0YJ40;G3V4X6;G3V2S9;H0YJW7;H0YJI1;H0YJ07;H0YJU7	Q9GZT3-2;Q9GZT3;A0A087WUN7;H0YJ40;G3V4X6;G3V2S9;H0YJW7	SRA stem-loop-interacting RNA-binding protein, mitochondrial	SLIRP
1.06901	0.696528	0.437654	1.7657	1.50843	1.56487		+	10	10	10	23.6	23.6	23.6	59.366	42.335	857020000	255830000	601180000	1.12927	0.634399	2.57643	1.513	Q99832;Q99832-3;Q99832-4;Q99832-2;F8WAM2;F8WBP8	Q99832;Q99832-3;Q99832-4;Q99832-2	T-complex protein 1 subunit eta	CCT7
0.77197	0.635522	0.784755	-0.0911564	0.245009	0.16221	+		16	16	16	23.9	23.9	23.9	101.67	104.16	1309500000	464690000	844790000	2.24537	0.630749	0.0165603	0.00535413	Q9H3U1-2;Q9H3U1;Q9H3U1-3	Q9H3U1-2;Q9H3U1	Protein unc-45 homolog A	UNC45A
0.727267	NaN	NaN	1.79929	1.43002	1.16208			3	3	3	32.6	32.6	32.6	14.013	8.828	115840000	42534000	73307000	0	0.627267	1.74822	1.3638	I3L1U7;I3L0X9;I3L3T0;P57737-3;A0A0A6YYL4;Q9Y3D7	I3L1U7;I3L0X9;I3L3T0;P57737-3;A0A0A6YYL4;Q9Y3D7	Coronin;Mitochondrial import inner membrane translocase subunit TIM16	PAM16;CORO7-PAM16
0.744333	0.588421	0.832444	-0.125746	-0.0650684	0.0651587			27	27	27	36.5	36.5	36.5	112.15	300.77	9571700000	3559600000	6012000000	1.88897	0.621733	0.89285	-0.141885	Q96FS4;F6RY50;E9PIB3	Q96FS4;F6RY50	Signal-induced proliferation-associated protein 1	SIPA1
0.688583	0.593593	0.874443	0.303225	0.371949	0.25084			16	16	9	65.3	65.3	35	37.377	323.31	39020000000	16835000000	22184000000	1.76192	0.618873	1.56707	0.208672	P62873;P62873-2;F6UT28;B1AKQ8;F6X3N5;B3KVK2	P62873;P62873-2;F6UT28;B1AKQ8;F6X3N5	Guanine nucleotide-binding protein G(I)/G(S)/G(T) subunit beta-1	GNB1
0.328032	0.717825	1.10568	NaN	1.55925	0.23952			9	2	2	20.2	4.5	4.5	44.348	27.2	731020000	318970000	412040000	0.955651	0.617178	0.357222	0.799384	Q58FF8	Q58FF8	Putative heat shock protein HSP 90-beta 2	HSP90AB2P
0.717123	NaN	NaN	NaN	NaN	NaN			5	5	5	25	25	25	26.132	13.711	209150000	87016000	122130000	0	0.617123	0	NaN	Q12981;Q12981-1;Q12981-2;Q12981-3	Q12981;Q12981-1;Q12981-2	Vesicle transport protein SEC20	BNIP1
0.709291	0.667302	0.772646	0.582845	0.753005	0.347099	+		16	16	16	55	55	55	26.697	93.033	15127000000	6526900000	8599700000	2.60939	0.616413	1.22605	0.460983	Q96C19;H0Y4Y4;A0A087X1Z2;Q9BUP0-2;Q9BUP0;C9JTV4;Q8WYH2	Q96C19	EF-hand domain-containing protein D2	EFHD2
0.51541	0.84551	0.779554	-0.273709	-0.360434	-0.536064			4	4	4	20.6	20.6	20.6	26.671	26.279	2327600000	984830000	1342800000	1.58541	0.613491	1.6214	-0.490069	Q9UNN8;A0A0U1RQQ4;A0A0U1RRC4	Q9UNN8;A0A0U1RQQ4	Endothelial protein C receptor	PROCR
0.745883	0.811635	0.580145	-0.0517132	-0.0314004	-0.0819344			57	57	55	49.6	49.6	48.6	115.28	323.31	140100000000	54511000000	85593000000	1.90635	0.612555	2.05303	-0.155016	O14974;O14974-4;O14974-3;O14974-5;O14974-2;F8VZN8;H0YHI8;H0YIS4;H0YIM2;H0YIS3;A0A0U1RQZ1;H0YHL8;F8VW28;H0YIL7;E1CKY7;O60237-4	O14974;O14974-4;O14974-3;O14974-5;O14974-2;F8VZN8	Protein phosphatase 1 regulatory subunit 12A	PPP1R12A
0.557778	0.740625	0.836651	0.754802	0.469469	0.560421			12	12	12	38.9	38.9	38.9	45.098	114.06	1527500000	567260000	960270000	1.75907	0.611685	1.55725	0.494898	P09543-2;P09543;K7EN66;C9K0L8;K7ERZ0;K7ERC4	P09543-2;P09543	2,3-cyclic-nucleotide 3-phosphodiesterase	CNP
0.695816	0.631616	0.79859	0.862987	1.0655	0.768925	+		16	16	16	37.6	37.6	37.6	57.466	169.77	7222700000	2700200000	4522600000	2.19913	0.608674	1.92893	0.799139	Q14247-3;Q14247;Q14247-2;H0YCD9;H0YEV2	Q14247-3;Q14247;Q14247-2	Src substrate cortactin	CTTN
0.524966	0.709114	0.878137	NaN	0.135404	0.111566			3	3	3	7.5	7.5	7.5	62.608	22.659	590790000	229710000	361080000	1.56322	0.604072	0.524346	0.0234845	P38432	P38432	Coilin	COIL
0.767401	0.625364	0.703898	-0.000129853	0.144308	0.0945064	+		33	33	33	58.6	58.6	58.6	53.248	323.31	366050000000	148320000000	217740000000	2.33051	0.598888	0.169349	-0.0204386	Q9ULV4;Q9ULV4-2;Q9ULV4-3;B4E3S0;H0YHL7;F8W1H8;F8VUX3;F8VSA4;F8VRE9;F8VTT6;F8VVB7;F8VV53;J3QLV6;J3KSS5;Q6QEF8-4;Q6QEF8-3;Q6QEF8-2;Q6QEF8-5;Q6QEF8;H3BRY3;P31146	Q9ULV4;Q9ULV4-2;Q9ULV4-3;B4E3S0;H0YHL7	Coronin-1C;Coronin	CORO1C
0.676538	0.716245	0.701239	0.181039	0.229711	0.0503276	+		65	65	1	69.8	69.8	1.8	85.225	323.31	504090000000	215470000000	288620000000	3.42657	0.598007	0.375011	0.0536925	Q9UHB6;F8VQE1;Q9UHB6-2;F8VRN8;F8VS07;Q9UHB6-3	Q9UHB6;F8VQE1;Q9UHB6-2;F8VRN8;F8VS07;Q9UHB6-3	LIM domain and actin-binding protein 1	LIMA1
0.342441	NaN	1.04082	NaN	-0.705641	-0.195137			5	5	4	28.6	28.6	25.2	36.413	101.87	396340000	200220000	196120000	0.469234	0.591632	0.558387	-0.550389	Q15417;E9PDU6;Q15417-3;Q15417-2	Q15417;E9PDU6;Q15417-3;Q15417-2	Calponin-3;Calponin	CNN3
0.616169	0.797843	0.656634	2.1128	2.27983	2.39523		+	8	8	8	11.5	11.5	11.5	99.31	35.234	1874900000	1258700000	616150000	2.06586	0.590215	2.84345	2.16262	A0A087WVM4;B7ZM99;Q6UB35;H0Y327;Q4VXM1;Q4VXM0;Q5JYA8;Q5JYA3;Q6UB35-2	A0A087WVM4;B7ZM99;Q6UB35	Monofunctional C1-tetrahydrofolate synthase, mitochondrial	MTHFD1L
0.690194	NaN	NaN	NaN	NaN	NaN			3	2	2	9	5.4	5.4	36.638	4.3178	116710000	45788000	70924000	0	0.590194	0	NaN	P07195;A8MW50;C9J7H8	P07195;A8MW50	L-lactate dehydrogenase B chain;L-lactate dehydrogenase	LDHB
NaN	NaN	0.689389	NaN	NaN	NaN			3	3	3	7.1	7.1	7.1	75.456	14.216	96032000	34679000	61353000	0	0.589389	0	NaN	P85037;P85037-2	P85037;P85037-2	Forkhead box protein K1	FOXK1
0.687688	NaN	NaN	NaN	NaN	NaN			2	2	2	8.5	8.5	8.5	22.109	3.4526	126060000	45840000	80216000	0	0.587688	0	NaN	Q7LBR1	Q7LBR1	Charged multivesicular body protein 1b	CHMP1B
0.57415	0.496309	0.992478	NaN	NaN	-0.457831			11	11	11	16.1	16.1	16.1	99.813	52.561	963890000	343960000	619920000	1.20501	0.587646	0	-0.557831	A0A0C4DFT3;Q12959-5;Q12959-3;Q12959-6;Q12959-4;Q12959;Q12959-7;Q12959-2;Q12959-8;Q12959-9;E7EQD7;H7C166;B4E2H8;C9J110;F2Z2L0;C9JUA9;C9JN61;H7C325;C9JCP6;A8MUT6;F8W750;B5MCC5;B7Z264;E9PIW2;B7Z2T4;E9PN83;Q15700-5;Q15700-3;Q15700;Q15700-4;Q15700-2	A0A0C4DFT3;Q12959-5;Q12959-3;Q12959-6;Q12959-4;Q12959;Q12959-7;Q12959-2;Q12959-8;Q12959-9;E7EQD7	Disks large homolog 1	DLG1
0.536351	0.721416	0.797843	0.640991	0.643394	0.877116			12	12	12	20.8	20.8	20.8	86.578	65.913	911080000	367380000	543700000	1.76587	0.585204	1.80807	0.6205	P47897-2;P47897;B4DDN1;H7C0R3;C9J165;A0A0U1RQM8;A0A0U1RQU2;A0A0U1RQT0;F2Z2V6;A0A0U1RQX5;A0A0U1RRI9;A0A0U1RQE9;A0A0U1RQX9;A0A0U1RRC8;A0A0U1RQL2;A0A0U1RQQ5;A0A0U1RQC3;A0A0U1RR66	P47897-2;P47897;B4DDN1;H7C0R3	Glutamine--tRNA ligase	QARS
0.698841	0.72779	0.620493	NaN	NaN	0.545968	+		5	5	5	39.8	39.8	39.8	13.133	10.196	322140000	135230000	186910000	2.52073	0.582374	0	0.445968	Q15370;Q15370-2;B8ZZU8;A0A0B4J296;I3L0M9	Q15370;Q15370-2;B8ZZU8;A0A0B4J296;I3L0M9	Transcription elongation factor B polypeptide 2	TCEB2
0.619084	0.650765	0.766213	0.643764	0.42094	0.41684	+		11	11	11	40	40	40	40.085	52.538	3089200000	1274900000	1814200000	2.22798	0.578687	1.46377	0.393848	Q96HE9;J3QR53;J3QKY4;J3QQS2;J3QRE1	Q96HE9	Proline-rich protein 11	PRR11
0.542208	0.608052	0.884871	1.84467	1.90608	1.63566		+	11	11	11	33.1	33.1	33.1	50.227	144.38	4512100000	1441400000	3070800000	1.50303	0.578377	2.63408	1.69547	Q9Y265;Q9Y265-2;E7ETR0;H7C4G5;J3QLR1;H7C4I3	Q9Y265;Q9Y265-2;E7ETR0	RuvB-like 1	RUVBL1
0.749749	0.656176	0.623586	-0.31423	-0.215563	-0.242123	+		18	18	18	45	45	45	66.193	222.11	14824000000	5184000000	9639900000	2.36914	0.576504	2.17152	-0.357306	O75083;O75083-3;D6RD66	O75083;O75083-3;D6RD66	WD repeat-containing protein 1	WDR1
0.675545	0.694033	0.646255	1.97446	1.94257	1.95754	+	+	8	7	7	35.9	30.3	30.3	21.892	25.857	974150000	313470000	660680000	3.22847	0.571944	4.60966	1.85819	P32119;A6NIW5;P32119-2	P32119;A6NIW5	Peroxiredoxin-2	PRDX2
0.584193	0.609282	0.817869	0.270947	0.204141	-0.267809			6	6	6	79.2	79.2	79.2	8.0061	45.29	10539000000	4651000000	5888300000	1.78402	0.570448	0.0594031	-0.030907	Q9UBI6	Q9UBI6	Guanine nucleotide-binding protein G(I)/G(S)/G(O) subunit gamma-12	GNG12
0.669934	NaN	NaN	-0.663511	NaN	NaN			4	4	4	2.8	2.8	2.8	270.63	8.5419	46202000	19691000	26512000	0	0.569934	0	-0.763511	P46821;D6RA40;D6RA32;E9PGC8;P78559;P78559-2	P46821;D6RA40;D6RA32	Microtubule-associated protein 1B;MAP1B heavy chain;MAP1 light chain LC1	MAP1B
NaN	NaN	0.669571	NaN	NaN	NaN			3	3	3	5.4	5.4	5.4	97.501	4.607	199280000	79533000	119750000	0	0.569571	0	NaN	Q8IY33;Q8IY33-4;Q8IY33-2;Q8IY33-5;Q8IY33-3	Q8IY33;Q8IY33-4;Q8IY33-2;Q8IY33-5	MICAL-like protein 2	MICALL2
0.782325	0.555914	NaN	NaN	NaN	NaN			4	4	4	12.2	12.2	12.2	39.183	15.891	182500000	92247000	90255000	0.903089	0.56912	0	NaN	O75367-2;O75367-3;O75367;B4DJC3;D6RCF2;Q9P0M6;Q5SQT3	O75367-2;O75367-3;O75367;B4DJC3;D6RCF2;Q9P0M6	Core histone macro-H2A.1;Histone H2A;Core histone macro-H2A.2	H2AFY;H2AFY2
0.668664	NaN	NaN	NaN	NaN	2.08474			2	2	2	9	9	9	20.783	3.0095	50770000	13535000	37235000	0	0.568664	0	1.98474	Q8IUR0	Q8IUR0	Trafficking protein particle complex subunit 5	TRAPPC5
0.711583	0.682573	0.609093	0.10742	0.125254	-0.00878387	+		33	33	33	37	37	37	144.75	233.31	10950000000	3733500000	7216400000	2.54157	0.56775	0.216531	-0.0253698	Q13045;Q13045-2;Q13045-3;J3KS54;J3QQQ2;J3QLR6;K7EQZ7;J3QQU5;J3KS39;K7EP37;K7EP27;J3KT47	Q13045;Q13045-2;Q13045-3	Protein flightless-1 homolog	FLII
0.732573	0.619272	0.634872	0.160146	0.180403	0.235237	+		84	84	84	48	48	48	231.1	323.31	37272000000	12065000000	25207000000	2.40309	0.562239	1.26206	0.0919284	A0A0D9SFK2;Q92614-4;Q92614;Q92614-3;Q92614-2;Q92614-5;H0YEV9	A0A0D9SFK2;Q92614-4;Q92614;Q92614-3;Q92614-2;Q92614-5	Unconventional myosin-XVIIIa	MYO18A
0.65828	0.666393	0.651499	3.14791	3.31497	3.07849	+	+	25	23	22	43.3	40.6	38.7	94.33	169.73	4408200000	871060000	3537100000	4.22646	0.558724	3.28515	3.08046	P34932;A0A087WYC1;A0A087WTS8;P34932-2	P34932;A0A087WYC1;A0A087WTS8	Heat shock 70 kDa protein 4	HSPA4
0.777115	0.40294	0.788017	0.211884	-0.18254	-0.304256			7	7	7	15.4	15.4	15.4	52.535	16.691	2510200000	1089000000	1421300000	1.31771	0.556024	0.463846	-0.191637	O43293;O43293-2;M0R0D0;A0A0A6YYK9;Q9UIK4;Q9UIK4-2	O43293	Death-associated protein kinase 3	DAPK3
NaN	0.655077	NaN	NaN	NaN	0.548831			4	3	3	6.6	5.3	5.3	97.903	9.3475	136610000	53895000	82711000	0	0.555077	0	0.448831	Q8NB90;Q8NB90-3;Q8NB90-2	Q8NB90;Q8NB90-3;Q8NB90-2	Spermatogenesis-associated protein 5	SPATA5
0.772983	0.535157	NaN	NaN	NaN	NaN			3	3	3	2.5	2.5	2.5	128.46	5.9123	79324000	22568000	56756000	0.870993	0.55407	0	NaN	O95239-2;O95239;Q2VIQ3	O95239-2;O95239	Chromosome-associated kinesin KIF4A	KIF4A
0.707083	0.614569	0.629007	0.997473	1.61772	1.71796	+		21	21	21	59.3	59.3	59.3	57.488	249.62	6165000000	2600700000	3564300000	2.566	0.550219	1.56929	1.34438	P78371;P78371-2;F5GWF6;F8VQ14	P78371;P78371-2;F5GWF6;F8VQ14	T-complex protein 1 subunit beta	CCT2
0.351176	0.837943	0.759752	0.717474	0.631616	0.327457			4	4	4	19	19	19	45.31	17.103	506730000	219170000	287560000	1.16865	0.549624	1.2181	0.458849	E7EU96;Q5U5J2;P68400;Q8NEV1;P68400-2	E7EU96;Q5U5J2;P68400;Q8NEV1;P68400-2	Casein kinase II subunit alpha;Casein kinase II subunit alpha 3	CSNK2A1;CSNK2A3
0.616075	0.619742	0.709379	0.30229	0.296076	0.133695	+		24	24	24	32	32	32	120.63	313.05	9447000000	3723600000	5723300000	2.51136	0.548399	0.917878	0.14402	Q9Y2D5-6;Q9Y2D5-4;Q9Y2D5-5;Q9Y2D5-7;Q9Y2D5;C9JVY5;Q8IXS6-2;B1ALY0;C9JZH4;C9JA33	Q9Y2D5-6;Q9Y2D5-4;Q9Y2D5-5;Q9Y2D5-7;Q9Y2D5;C9JVY5	A-kinase anchor protein 2	AKAP2
0.647821	NaN	NaN	NaN	NaN	NaN			4	4	3	11.4	11.4	9.3	44.049	7.6503	141730000	24041000	117690000	0	0.547821	0	NaN	Q14344;Q14344-2	Q14344;Q14344-2	Guanine nucleotide-binding protein subunit alpha-13	GNA13
0.703366	0.608431	0.630685	-0.0579172	0.00345838	0.00432164	+		49	49	49	42.8	42.8	42.8	198.56	323.31	11218000000	2514100000	8703500000	2.56383	0.547494	1.52608	-0.116712	Q702N8;Q702N8-2;Q702N8-3	Q702N8;Q702N8-2	Xin actin-binding repeat-containing protein 1	XIRP1
NaN	NaN	0.640714	0.913493	NaN	0.266517			3	3	3	11.9	11.9	11.9	47.46	16.921	495610000	258310000	237300000	0	0.540714	0.430084	0.490005	O96019;O96019-2;H7C5S0	O96019;O96019-2	Actin-like protein 6A	ACTL6A
0.838185	0.475085	0.605968	0.445833	0.532766	0.474254		+	95	77	76	50.1	44.3	43.3	228.66	323.31	109350000000	41436000000	67918000000	1.43673	0.539746	2.35599	0.384284	Q7Z406-6;Q7Z406;Q7Z406-2;Q7Z406-4;Q7Z406-5;M0QY43;A0A0C4DFM8;A1L2Z2	Q7Z406-6;Q7Z406;Q7Z406-2;Q7Z406-4;Q7Z406-5;M0QY43	Myosin-14	MYH14
0.683741	0.49416	0.736908	-0.0612249	-0.193932	NaN			5	5	5	13.1	13.1	13.1	76.968	52.906	1661100000	696130000	964950000	1.7394	0.53827	0.743263	-0.227578	A0A0A0MTR1;P55290;P55290-4;A0A087X0X6;P55290-5;P55290-3;P55290-2	A0A0A0MTR1;P55290;P55290-4;A0A087X0X6;P55290-5	Cadherin-13	CDH13
0.641546	0.517729	0.754374	0.130008	0.187514	0.311038			18	18	12	58	58	40.6	40.45	322.23	41514000000	18100000000	23413000000	1.80241	0.537883	0.752599	0.10952	P04899;P04899-6;P04899-3;P04899-5;P04899-2;P04899-4;P11488;P19087;A8MTJ3;A2A2R6;Q5JWD1;H0Y7E8;A0A087WZE5;P38405-3;P38405;P38405-2	P04899;P04899-6;P04899-3;P04899-5;P04899-2;P04899-4	Guanine nucleotide-binding protein G(i) subunit alpha-2	GNAI2
0.423202	0.702923	0.783499	-0.0437798	-0.161218	-0.21838			7	7	7	16.1	16.1	16.1	55.697	28.727	967920000	364810000	603100000	1.40895	0.536541	1.37109	-0.241126	E7EMV7;A0A0A0MRZ4;Q15025-7;Q15025-8;Q15025-5;Q15025-6;Q15025-4;Q15025-3;Q15025-2;Q15025;E7EW15;H0YC17	E7EMV7;A0A0A0MRZ4;Q15025-7;Q15025-8;Q15025-5;Q15025-6;Q15025-4;Q15025-3;Q15025-2;Q15025;E7EW15	TNFAIP3-interacting protein 1	TNIP1
0.695103	0.516015	0.695816	0.476433	0.316378	0.044464			28	28	1	18.9	18.9	1	203.05	129.39	4802300000	1548700000	3253600000	1.91216	0.535645	0.535585	0.179092	Q15746-2;Q15746-4	Q15746-2;Q15746-4	Myosin light chain kinase, smooth muscle;Myosin light chain kinase, smooth muscle, deglutamylated form	MYLK
0.571434	0.615887	0.716245	0.0787465	-0.045357	-0.0474577	+		14	14	14	45	45	45	48.486	110.98	5556000000	2512000000	3043900000	2.19661	0.534522	0.889952	-0.104689	Q9UKS6;A0A0C4DGG1;E9PIY1;E9PJ75;E9PNM9;E9PJ33;H0YDM6	Q9UKS6;A0A0C4DGG1;E9PIY1	Protein kinase C and casein kinase substrate in neurons protein 3	PACSIN3
0.795933	NaN	0.472176	0.597698	0.594453	0.458907			7	3	3	31.1	17.2	17.2	27.85	29.749	683410000	281130000	402280000	0.727315	0.534054	1.99331	0.450353	P31946-2;P31946	P31946-2;P31946	14-3-3 protein beta/alpha;14-3-3 protein beta/alpha, N-terminally processed	YWHAB
0.91976	0.626673	0.35558	1.07286	1.26123	0.741575			15	15	15	12.5	12.5	12.5	152.2	44.185	4414500000	1589200000	2825300000	1.08721	0.534004	1.58657	0.925222	Q13428-3;E7ETY2;Q13428-8;Q13428-7;Q13428;Q13428-4;J3KQ96;Q13428-2;Q13428-6;Q13428-5;H0YAB7;H0YA99	Q13428-3;E7ETY2;Q13428-8;Q13428-7;Q13428;Q13428-4;J3KQ96;Q13428-2;Q13428-6;Q13428-5	Treacle protein	TCOF1
0.579566	NaN	0.686075	NaN	NaN	1.42385			2	2	2	12.2	12.2	12.2	16.817	3.676	132200000	42652000	89544000	1.19779	0.53282	0	1.32385	A0A087WY85;P61077;P61077-2;P61077-3;D6R9F6;D6R933;D6RGD0;D6R980;D6RAW0;D6RIZ3;D6RA11;D6RFM0;D6RAH7;H9KV45;A0A0A0MQU3;P62837-2;P62837	A0A087WY85;P61077;P61077-2;P61077-3;D6R9F6;D6R933;D6RGD0;D6R980;D6RAW0;D6RIZ3;D6RA11;D6RFM0;D6RAH7;H9KV45;A0A0A0MQU3;P62837-2;P62837	Ubiquitin-conjugating enzyme E2 D3;Ubiquitin-conjugating enzyme E2 D2	UBE2D3;UBE2D2
0.590051	0.586501	0.721329	-0.236248	-0.265622	-0.368458	+		19	19	19	40	40	40	60.693	95.037	8370800000	3166700000	5204100000	2.1633	0.532627	1.9833	-0.39011	P83111;P83111-2;H0YNN5	P83111;P83111-2	Serine beta-lactamase-like protein LACTB, mitochondrial	LACTB
0.753947	0.578311	0.565402	0.603217	0.918234	0.921893			11	11	11	12.3	12.3	12.3	129.57	88.166	2095500000	1369900000	725630000	1.89316	0.532553	1.6744	0.714448	Q13751;X1WI29	Q13751	Laminin subunit beta-3	LAMB3
0.909888	0.414136	0.570269	0.982583	1.13711	1.03738		+	8	8	8	63.5	63.5	63.5	17.965	78.142	49357000000	15252000000	34105000000	1.16642	0.531431	2.64817	0.952358	P62979;J3QS39;J3QTR3;F5H6Q2;F5GYU3;F5H2Z3;F5H265;B4DV12;F5H388;F5H747;F5GXK7;J3QKN0;Q5PY61;Q96C32;P62987;P0CG47;P0CG48;M0R1V7;J3QSA3;F5GZ39;M0R1M6;M0R2S1	P62979;J3QS39;J3QTR3;F5H6Q2;F5GYU3;F5H2Z3;F5H265;B4DV12;F5H388;F5H747;F5GXK7;J3QKN0;Q5PY61;Q96C32;P62987;P0CG47;P0CG48;M0R1V7	Ubiquitin-40S ribosomal protein S27a;Ubiquitin;40S ribosomal protein S27a;Ubiquitin-60S ribosomal protein L40;Ubiquitin;60S ribosomal protein L40;Polyubiquitin-B;Ubiquitin;Polyubiquitin-C;Ubiquitin	RPS27A;UBB;UBC;UBA52
0.708673	0.601221	0.581881	0.252658	0.137372	0.177089	+		16	10	7	61.2	40	32.1	37.331	222.23	13593000000	5933700000	7658900000	2.26128	0.530592	0.92443	0.0890396	P62879;E7EP32;C9JXA5;C9JIS1;C9JZN1;P62879-2;F5H8J8;F5H100;F5H0S8;E9PCP0;P16520-2;P16520	P62879;E7EP32;C9JXA5;C9JIS1;C9JZN1;P62879-2	Guanine nucleotide-binding protein G(I)/G(S)/G(T) subunit beta-2	GNB2
0.531369	0.736994	0.620211	2.14274	2.1746	1.8635		+	15	15	15	34	34	34	65.308	79.615	2051800000	634660000	1417200000	1.90628	0.529525	2.59662	1.96028	P30153;B3KQV6;C9J9C1;E9PH38;P30154-5;P30154-4;P30154;P30154-2;H0YDG7;P30154-3;E9PPI5;E9PNM7;E9PHZ6	P30153;B3KQV6;C9J9C1	Serine/threonine-protein phosphatase 2A 65 kDa regulatory subunit A alpha isoform	PPP2R1A
0.604925	0.481402	0.796515	0.0900404	0.103128	1.20839			7	7	7	14.7	14.7	14.7	63.621	29.57	807630000	286570000	521060000	1.53932	0.527614	0.370352	0.367187	G3V1N3;Q86XJ1	G3V1N3;Q86XJ1	GAS2-like protein 3	GAS2L3
0.623492	0.607674	0.649018	NaN	NaN	-0.379676	+		4	4	4	38.8	38.8	38.8	13.569	10.487	344530000	123770000	220750000	3.28196	0.526728	0	-0.479676	P35244;B5MC59	P35244;B5MC59	Replication protein A 14 kDa subunit	RPA3
0.733875	0.51783	NaN	0.340619	0.386149	0.183328			4	4	4	18.8	18.8	18.8	19.531	7.0998	194290000	89667000	104620000	0.88947	0.525852	1.09463	0.203365	F8VUA2;F8VVT7;Q9HD42;F5H875	F8VUA2;F8VVT7;Q9HD42	Charged multivesicular body protein 1a	CHMP1A
0.544189	0.596458	0.720016	0.130272	0.154454	-0.137664			11	11	11	65.4	65.4	65.4	23.354	129.48	7561500000	3488100000	4073400000	2.0047	0.520221	0.193403	-0.0509794	O00161;O00161-2;H3BM38;H3BNE1;H3BR18;H3BPJ0;H3BV99;H3BP15;H3BQY9;H3BNG6;H3BU94;H3BR99	O00161;O00161-2;H3BM38;H3BNE1;H3BR18;H3BPJ0	Synaptosomal-associated protein 23;Synaptosomal-associated protein	SNAP23
0.470407	0.312084	1.07704	0.426318	0.407733	-0.578736			3	3	3	32.1	32.1	32.1	11.972	16.521	16033000000	9035900000	6997600000	0.808238	0.519843	0.0139951	-0.0148948	F5GX77;Q9UI30-2;Q9UI30;F5GYQ2	F5GX77;Q9UI30-2;Q9UI30	Multifunctional methyltransferase subunit TRM112-like protein	TRMT112
0.528971	0.593975	0.735262	-0.123277	-0.201244	-0.287378			33	33	33	54.3	54.3	54.3	81.12	216.6	17636000000	7390200000	10246000000	1.87072	0.519403	1.62974	-0.303966	O14639-2;O14639-6;O14639;F8W8M4;A0A0A0MRL6;O14639-3;O14639-5;O14639-4;J3QSX6;H0Y7N6;F6XFR5	O14639-2;O14639-6;O14639;F8W8M4;A0A0A0MRL6;O14639-3;O14639-5;O14639-4;J3QSX6	Actin-binding LIM protein 1	ABLIM1
0.660472	0.504773	0.690462	-0.135158	0.291368	-0.183425			15	15	15	33.7	33.7	33.7	69.725	82.379	2513200000	950370000	1562800000	1.91741	0.518569	0.263755	-0.109072	Q13772;Q13772-3;Q13772-4;B4DF87;B4DZ85;Q13772-2	Q13772;Q13772-3;Q13772-4;B4DF87;B4DZ85	Nuclear receptor coactivator 4	NCOA4
0.439464	0.566084	0.848077	0.557386	NaN	NaN			3	2	2	4.2	3	3	77.224	6.5187	200150000	71574000	128570000	1.29834	0.517875	0	0.457386	Q9Y2L9-2;Q9Y2L9;Q9Y2L9-3	Q9Y2L9-2;Q9Y2L9;Q9Y2L9-3	Leucine-rich repeat and calponin homology domain-containing protein 1	LRCH1
0.597889	0.701948	0.543892	-0.00620245	-0.0509656	-0.100948			68	68	68	61.1	61.1	61.1	120.18	323.31	200400000000	78555000000	121840000000	2.09542	0.514576	1.51366	-0.152705	Q69YQ0-2;Q69YQ0;F8WAN1;C9J8U1;C9JLY8;REV__Q9P225-2;REV__Q9P225	Q69YQ0-2;Q69YQ0;F8WAN1;C9J8U1	Cytospin-A	SPECC1L;SPECC1L-ADORA2A
0.592732	0.619366	0.625458	-0.189137	-0.0927863	-0.46953	+		3	3	3	29.6	29.6	29.6	11.985	31.948	17191000000	7877500000	9313200000	3.41548	0.512519	1.04519	-0.350484	E9PNW4;E9PR17;P13987;H0YET2	E9PNW4;E9PR17;P13987	CD59 glycoprotein	CD59
0.53077	0.517729	0.788519	0.332507	0.378512	0.185867			28	28	28	42.8	42.8	42.8	93.609	249.84	13380000000	5222500000	8157300000	1.54726	0.512339	1.121	0.198962	B8ZZD4;Q86VP1-2;Q86VP1;Q86VP1-4;Q86VP1-3;H7C3L5;C9J7J4;F8WBU9;C9JBZ7	B8ZZD4;Q86VP1-2;Q86VP1;Q86VP1-4;Q86VP1-3	Tax1-binding protein 1	TAX1BP1
0.569005	0.623492	0.644133	0.305329	0.25544	0.147567	+		69	69	48	80.4	80.4	59.1	103.06	323.31	259610000000	109550000000	150060000000	2.71928	0.51221	1.00093	0.136112	P12814;P12814-3;P12814-2;P12814-4;H9KV75;G3V2N5;P35609-2;P35609;H0YJW3;H7C5W8;G3V2W4;H0YJ11;Q08043;F6THM6;A0A087WSZ2;G3V5M4;G3V2X9;G3V2E8;G3V380;D6RH00	P12814;P12814-3;P12814-2;P12814-4;H9KV75	Alpha-actinin-1	ACTN1
0.538538	0.676358	NaN	0.104605	NaN	NaN			2	2	2	2.7	2.7	2.7	92.48	6.1393	183800000	64284000	119510000	1.06588	0.507448	0	0.00460499	P55884;P55884-2	P55884;P55884-2	Eukaryotic translation initiation factor 3 subunit B	EIF3B
0.693677	0.570366	0.553262	0.178237	0.220949	0.196607			70	70	1	63.2	63.2	1	119.63	323.31	419860000000	166020000000	253830000000	2.1214	0.505768	1.81309	0.0985976	O00159-3;F5H6E2;O00159	O00159-3;F5H6E2;O00159	Unconventional myosin-Ic	MYO1C
NaN	NaN	0.60521	NaN	NaN	NaN			4	4	4	9.7	9.7	9.7	59.271	7.7884	80286000	24523000	55764000	0	0.50521	0	NaN	O15355	O15355	Protein phosphatase 1G	PPM1G
0.805375	0.441696	0.545079	-0.341446	-0.174605	-0.23766			4	4	4	26.1	26.1	26.1	17.041	33.62	8786000000	3887700000	4898300000	1.35454	0.497383	1.72951	-0.351237	E9PIM6;E9PNQ8;P04216;J3QRJ3	E9PIM6;E9PNQ8;P04216;J3QRJ3	Thy-1 membrane glycoprotein	THY1
0.648005	0.502942	0.638862	0.655169	0.957915	1.08583			5	5	5	22.1	22.1	22.1	42.613	43.404	718370000	280200000	438180000	2.05535	0.496603	1.6097	0.799639	P61163;R4GMT0;P42025	P61163;R4GMT0	Alpha-centractin	ACTR1A
0.542208	0.804301	0.437334	0.894604	1.0545	0.850559		+	9	8	8	31.9	25.7	25.7	41.569	26.698	1108000000	430100000	677930000	1.34305	0.494615	2.2609	0.833222	Q92747;E9PF58;Q92747-2;F8WFD3	Q92747;E9PF58;Q92747-2	Actin-related protein 2/3 complex subunit 1A	ARPC1A
0.580628	0.738292	0.463622	1.86124	1.95073	1.94636		+	27	27	26	41.4	41.4	40.2	95.337	171.94	6309000000	1880100000	4428900000	1.60267	0.494181	3.59142	1.81944	P13639	P13639	Elongation factor 2	EEF2
0.399991	0.590434	0.789187	1.37139	1.45175	1.83455			8	8	8	24.8	24.8	24.8	47.716	30.668	4758800000	1937300000	2821400000	1.31713	0.493204	2.02053	1.45256	P23526;P23526-2	P23526;P23526-2	Adenosylhomocysteinase	AHCY
0.586885	0.550802	0.641916	NaN	1.32556	0.833902	+		6	6	6	82	82	82	9.9601	35.831	504370000	203350000	301020000	2.54172	0.493201	0.805469	0.979731	E5RHG8;Q15369;Q15369-2;R4GMY8	E5RHG8;Q15369;Q15369-2;R4GMY8	Transcription elongation factor B polypeptide 1	TCEB1
0.527771	0.611172	0.632268	0.567351	0.919149	0.282025	+		5	5	3	58.4	58.4	33.7	10.366	92.35	1315300000	532180000	783160000	2.37619	0.490404	0.930787	0.489508	P63167;F8VXL2;F8VRV5;F8VXI7	P63167;F8VXL2;F8VRV5	Dynein light chain 1, cytoplasmic	DYNLL1
0.40294	0.773574	NaN	0.616922	1.08161	0.616075			2	2	2	9.1	9.1	9.1	26.76	6.2418	276750000	107310000	169430000	0.63651	0.488257	1.3064	0.671537	A8MU58;F8W950;Q13155	A8MU58;F8W950;Q13155	Aminoacyl tRNA synthase complex-interacting multifunctional protein 2	AIMP2
0.57628	0.543496	0.639788	0.556111	0.512075	0.304978	+		9	9	9	58.8	58.8	58.8	17.259	113.59	14263000000	6085600000	8177400000	2.4739	0.486521	1.35864	0.357721	Q04837;A0A0G2JLD8;E7EUY5;C9K0U8	Q04837;A0A0G2JLD8;E7EUY5;C9K0U8	Single-stranded DNA-binding protein, mitochondrial	SSBP1
0.531968	0.690194	0.535655	0.433814	0.590913	-0.336756			4	4	4	13.2	13.2	13.2	35.808	13.074	919670000	341930000	577740000	1.94627	0.485939	0.157344	0.129324	O00214;O00214-2;E9PN19;F6V2D4;B1ANM0;H7BXD8;Q5T3P9;E9PJ77;E9PRN3	O00214;O00214-2;E9PN19;F6V2D4;B1ANM0;H7BXD8;Q5T3P9	Galectin-8;Galectin	LGALS8
0.476433	0.430071	0.851119	-0.063771	-0.0297059	-0.0492479		+	10	10	10	21.5	21.5	21.5	54.392	38.571	1979800000	799120000	1180700000	1.16935	0.485875	2.35236	-0.147575	Q9UQ03-2;Q9UQ03	Q9UQ03-2;Q9UQ03	Coronin-2B	CORO2B
0.954569	0.19497	NaN	-0.705288	-0.193998	NaN			6	6	6	9.3	9.3	9.3	134.42	16.41	753320000	599960000	153350000	0.366996	0.474769	0.557282	-0.549643	Q96R06;K7ELG0;K7ELC8;J3KTQ0;F5GZT2	Q96R06	Sperm-associated antigen 5	SPAG5
0.445091	0.703366	NaN	3.65855	3.49172	3.56925		+	10	10	10	29.3	29.3	29.3	50.854	75.13	3095000000	776670000	2318400000	0.771459	0.474229	3.71549	3.47318	Q9NS86	Q9NS86	LanC-like protein 2	LANCL2
0.839557	0.582556	0.298072	-0.0306929	0.0229004	-0.005652			246	246	206	79.4	79.4	69.6	226.53	323.31	9824900000000	4038100000000	5786800000000	1.02691	0.473395	1.67244	-0.104481	P35579;P35579-2;Q5BKV1;B1AH99;REV__S4R3H4;REV__E7EQT4;REV__Q9UKV3-5;REV__Q9UKV3;A0A087X0T3;P13535;Q9UKX3;Q9Y623;P11055;A7E2Y1	P35579;P35579-2	Myosin-9	MYH9
0.595313	0.53973	0.580821	0.229588	0.0780633	0.0643311	+		52	52	52	54	54	54	120.27	323.31	26339000000	11977000000	14362000000	2.90596	0.471954	0.158118	0.0239941	Q86V48;Q86V48-2;Q86V48-3;E5RFK8;E5RHU7	Q86V48;Q86V48-2;Q86V48-3	Leucine zipper protein 1	LUZP1
0.550704	0.49057	0.673104	-0.282597	-0.109297	-0.111477			24	24	24	32.3	32.3	32.3	113.08	129.58	5492200000	2148600000	3343600000	1.89521	0.471459	1.36641	-0.26779	P09874;Q5VX84;Q5VX85	P09874	Poly [ADP-ribose] polymerase 1	PARP1
0.479024	0.473215	0.760264	1.10615	1.02616	1.20783		+	15	15	15	29.2	29.2	29.2	81.307	122.39	2872400000	1067700000	1804700000	1.4182	0.470834	2.57186	1.01338	P33993;P33993-3;P33993-2;C9J8M6	P33993;P33993-3	DNA replication licensing factor MCM7	MCM7
NaN	0.568908	NaN	-1.90223	0.986957	1.19893			5	5	5	47.1	47.1	47.1	23.356	103.27	391730000	327780000	63954000	0	0.468908	0.00167502	-0.00544542	P09211;A8MX94;A0A087X2E9;A0A087X243	P09211;A8MX94	Glutathione S-transferase P	GSTP1
0.600936	0.566279	0.53655	-0.223845	-0.264478	-0.29807	+	+	36	36	2	66.5	66.5	2.5	73.612	323.31	61610000000	25769000000	35841000000	2.80213	0.467922	2.4568	-0.362131	O15231-3;H0Y704;O15231-2	O15231-3;H0Y704;O15231-2	Zinc finger protein 185	ZNF185
0.700795	0.23585	0.76137	0.229834	0.619554	0.588133			11	11	11	10.2	10.2	10.2	121.71	25.193	741310000	266090000	475220000	0.97092	0.466005	1.02845	0.379174	F5GY55;Q16531;F5GWI0;F5H2L3;F5GZY8;F5GYG8	F5GY55;Q16531	DNA damage-binding protein 1	DDB1
0.525067	0.634036	0.535655	NaN	NaN	-0.493682	+		4	4	4	21.5	21.5	21.5	31.932	11.537	218090000	92181000	125910000	2.25787	0.464919	0	-0.593682	Q9HAN9	Q9HAN9	Nicotinamide/nicotinic acid mononucleotide adenylyltransferase 1	NMNAT1
0.569005	0.673285	0.445621	NaN	NaN	NaN			2	2	2	9.7	9.7	9.7	22.217	4.2179	126650000	40354000	86295000	1.70699	0.462637	0	NaN	K7EK18;K7EL40;Q9UHD8-4;Q9UHD8-9;Q9UHD8-3;Q9UHD8-8;Q9UHD8-7;Q9UHD8-2;Q9UHD8-5;Q9UHD8;K7EIR4;K7EKN4;K7EN52;K7ENQ5;K7EJZ2;K7ELJ9;K7ER52;K7EIE4;K7ER14;K7EQD7	K7EK18;K7EL40;Q9UHD8-4;Q9UHD8-9;Q9UHD8-3;Q9UHD8-8;Q9UHD8-7;Q9UHD8-2;Q9UHD8-5;Q9UHD8;K7EIR4;K7EKN4;K7EN52;K7ENQ5;K7EJZ2;K7ELJ9;K7ER52;K7EIE4;K7ER14;K7EQD7	Septin-9	2016-09-09
0.392867	0.715806	0.570949	0.84326	NaN	0.586597			3	3	3	10.6	10.6	10.6	37.563	15.422	358210000	145420000	212790000	1.41059	0.459874	0.882799	0.614929	O00303;H0YDT6;E9PQV8	O00303	Eukaryotic translation initiation factor 3 subunit F	EIF3F
0.555031	0.570851	0.549916	1.36446	1.24294	1.28108	+	+	7	7	7	26.8	26.8	26.8	31.629	22.537	1188000000	450300000	737670000	3.7241	0.458599	3.04641	1.19616	P21912;A0A087WXX8;A0A087WWT1	P21912;A0A087WXX8;A0A087WWT1	Succinate dehydrogenase [ubiquinone] iron-sulfur subunit, mitochondrial	SDHB
0.556895	NaN	NaN	NaN	0.879392	NaN			3	3	3	18.3	18.3	18.3	38.448	29.256	312970000	128900000	184070000	0	0.456895	0	0.779392	A0A0A0MSZ9;Q05048;A3KFI9	A0A0A0MSZ9;Q05048	Cleavage stimulation factor subunit 1	CSTF1
0.709202	NaN	0.403377	NaN	NaN	NaN			2	2	2	5.4	5.4	5.4	58.161	8.3227	46929000	16246000	30683000	0.686434	0.45629	0	NaN	Q86U38-2;Q86U38	Q86U38-2;Q86U38	Nucleolar protein 9	NOP9
0.612588	0.52647	0.52667	0.309409	0.269153	0.330558	+		73	73	73	62.8	62.8	62.8	145.01	323.31	94958000000	36370000000	58589000000	2.40412	0.455243	2.10922	0.20304	A0A0A0MRM8;Q9UM54-5;Q9UM54-2;Q9UM54-6;E7EW20;Q9UM54-4;Q9UM54-1;Q9UM54;A0A0D9SGC1;Q5JVM0	A0A0A0MRM8;Q9UM54-5;Q9UM54-2;Q9UM54-6;E7EW20;Q9UM54-4;Q9UM54-1;Q9UM54;A0A0D9SGC1	Unconventional myosin-VI	MYO6
1.18485	NaN	-0.0756264	NaN	0.937796	1.09775			5	5	5	6.5	6.5	6.5	106.21	14.858	540570000	150300000	390270000	0.220277	0.454613	1.257	0.917771	O94851-5;O94851-6;O94851-4;O94851-3;O94851;O94851-2;E9PJB0;E9PRE0;E9PL42;E9PNC3;E9PKI3	O94851-5;O94851-6;O94851-4;O94851-3;O94851;O94851-2	Protein-methionine sulfoxide oxidase MICAL2	MICAL2
0.567351	NaN	0.538836	NaN	NaN	2.73268			4	4	4	16.9	16.9	16.9	28.487	7.4488	296280000	91200000	205080000	1.69841	0.453093	0	2.63268	H0YF29;Q6P1X6-2;Q6P1X6	H0YF29;Q6P1X6-2;Q6P1X6	UPF0598 protein C8orf82	C8orf82
0.492417	0.572696	0.581689	0.775177	0.812621	0.726134	+	+	56	56	56	46.3	46.3	46.3	157.9	323.31	15911000000	6101000000	9809600000	2.40102	0.448934	2.85743	0.671311	P42704;B8ZZ38;A0A0C4DG06;C9JCA9;H7C3W8;A0A0C4DG51;Q9NP80-3;Q9NP80-2;Q9NP80	P42704	Leucine-rich PPR motif-containing protein, mitochondrial	LRPPRC
0.464982	0.521151	0.653519	0.909351	0.842536	0.657731			14	14	14	56.5	56.5	56.5	22.391	153.93	42270000000	18421000000	23849000000	1.81517	0.446551	1.94852	0.703206	M0R0F0;P46782;M0R0R2;M0QZN2	M0R0F0;P46782;M0R0R2;M0QZN2	40S ribosomal protein S5;40S ribosomal protein S5, N-terminally processed	RPS5
0.0842003	0.798092	0.753433	NaN	NaN	NaN			5	5	5	19.9	19.9	19.9	35.695	14.83	579610000	199690000	379920000	0.713097	0.445242	0	NaN	H3BLV0;B1AP13;H7BY55;P08174-4;P08174;P08174-3;P08174-5;P08174-2;P08174-6;P08174-7;B1AP15	H3BLV0;B1AP13;H7BY55;P08174-4;P08174;P08174-3;P08174-5;P08174-2;P08174-6;P08174-7	Complement decay-accelerating factor	CD55
0.388024	0.700173	NaN	-0.250131	0.275007	0.111432			9	6	6	29.4	20.3	20.3	40.086	20.523	1277800000	605090000	672760000	0.667257	0.444099	0.119951	-0.054564	P09471-2;P09471;H3BTM2;H3BN82;A0A087WTB6;H3BQG8	P09471-2;P09471	Guanine nucleotide-binding protein G(o) subunit alpha	GNAO1
0.71949	NaN	0.368042	NaN	1.799	NaN			5	5	5	6.3	6.3	6.3	109.68	20.706	320040000	93696000	226340000	0.619733	0.443766	0	1.699	P33176;A0A0G2JMZ6;J3KNA1;O60282;Q12840;O60282-2	P33176	Kinesin-1 heavy chain	KIF5B
0.594453	0.484808	NaN	0.448584	0.542605	0.439251			6	4	4	28	20.7	20.7	28.218	27.247	458270000	205830000	252430000	1.10249	0.439631	2.12003	0.376813	Q04917;A2IDB2	Q04917;A2IDB2	14-3-3 protein eta	YWHAH
0.538836	NaN	NaN	NaN	NaN	NaN			2	2	2	2.8	2.8	2.8	114.02	2.9662	49249000	12728000	36521000	0	0.438836	0	NaN	G3V5V3;O60524-4;O60524-5;O60524-3;O60524	G3V5V3;O60524-4;O60524-5;O60524-3;O60524	Nuclear export mediator factor NEMF	NEMF
0.352984	0.721766	NaN	NaN	NaN	NaN			3	3	3	25.9	25.9	25.9	18.042	6.2336	37750000	14914000	22836000	0.595175	0.437375	0	NaN	P24666;G5E9R5;P24666-4;F2Z2Q9;P24666-3;P24666-2	P24666;G5E9R5;P24666-4	Low molecular weight phosphotyrosine protein phosphatase	ACP1
0.589955	NaN	0.484293	NaN	NaN	0.905274			2	2	2	19	19	19	23.598	27.911	345590000	144810000	200780000	1.11594	0.437124	0	0.805274	Q9HCN8	Q9HCN8	Stromal cell-derived factor 2-like protein 1	SDF2L1
0.419431	0.585347	0.587557	0.322505	0.0919367	-0.0987527			22	22	22	42.7	42.7	42.7	67.942	276.15	15321000000	6664200000	8656600000	1.78787	0.430778	0.0133848	0.00522965	Q6NYC8;A0A0G2JHC2;Q6NYC8-3;Q6NYC8-2;Q6NYC8-4;A0A0G2JKF1	Q6NYC8;A0A0G2JHC2;Q6NYC8-3;Q6NYC8-2	Phostensin	PPP1R18
0.648834	0.385044	0.55454	NaN	0.000288558	-0.0810032			8	8	8	39.3	39.3	39.3	29.247	48.037	2722700000	1147600000	1575100000	1.51137	0.429473	0.746059	-0.140357	P15927;P15927-2;P15927-3;Q5TEJ7;Q5TEJ0	P15927;P15927-2;P15927-3;Q5TEJ7	Replication protein A 32 kDa subunit	RPA2
0.5144	0.564329	0.501516	4.01498	4.01239	3.87263	+	+	46	46	44	59.6	59.6	58.6	72.332	323.31	247710000000	33083000000	214630000000	2.69708	0.426748	3.83014	3.86667	P11021	P11021	78 kDa glucose-regulated protein	HSPA5
0.381948	0.671384	NaN	NaN	NaN	NaN			3	3	3	1.1	1.1	1.1	532.4	14.404	57935000	16936000	40999000	0.681563	0.426666	0	NaN	Q14204	Q14204	Cytoplasmic dynein 1 heavy chain 1	DYNC1H1
0.541416	0.457121	0.573278	2.43832	2.36561	2.3799	+	+	13	13	13	78.5	78.5	78.5	26.923	125.67	1870300000	516800000	1353500000	2.17949	0.423938	4.02716	2.29461	Q99714;Q99714-2;Q5H928	Q99714;Q99714-2;Q5H928	3-hydroxyacyl-CoA dehydrogenase type-2	HSD17B10
0.672923	0.373175	NaN	1.22836	NaN	0.862511			4	4	4	14.8	14.8	14.8	36.177	18.165	256440000	88589000	167850000	0.664035	0.423049	0.914816	0.945434	Q8NBS9-2;Q8NBS9	Q8NBS9-2;Q8NBS9	Thioredoxin domain-containing protein 5	TXNDC5
0.500904	0.450697	0.616546	0.248171	0.435629	0.314639			15	10	10	45.8	30.8	30.8	40.532	171.43	13573000000	6823800000	6749600000	1.87856	0.422716	1.28978	0.232813	P08754	P08754	Guanine nucleotide-binding protein G(k) subunit alpha	GNAI3
0.484705	0.436695	0.641084	1.06095	0.939678	1.02913		+	23	23	23	35.1	35.1	35.1	90.98	118.72	3891200000	1413700000	2477400000	1.68131	0.420828	2.79919	0.90992	P25205;P25205-2;J3KQ69;Q7Z6P5	P25205;P25205-2;J3KQ69	DNA replication licensing factor MCM3	MCM3
0.605494	0.37829	0.57599	0.284751	0.34301	0.398131			16	16	13	46.6	46.6	40.6	40.282	196.14	32629000000	13273000000	19356000000	1.55814	0.419925	1.74922	0.241964	Q12792;Q12792-3;Q12792-4;F8VS81;F8W1Q9;F8VRG3	Q12792;Q12792-3;Q12792-4;F8VS81	Twinfilin-1	TWF1
0.594453	0.394404	0.567253	-0.802361	1.01243	1.62691			10	10	10	41.5	41.5	41.5	16.118	314.95	3512100000	3361000000	151110000	1.66435	0.418704	0.255627	0.512324	I3L397;I3L504;P63241;P63241-2;Q6IS14;F8WCJ1;C9J7B5;C9J4W5;Q9GZV4	I3L397;I3L504;P63241;P63241-2	Eukaryotic translation initiation factor 5A;Eukaryotic translation initiation factor 5A-1	EIF5A
0.159888	0.873892	NaN	NaN	NaN	NaN			5	5	5	5.2	5.2	5.2	126.55	16.787	135080000	57680000	77399000	0.345984	0.41689	0	NaN	Q9Y613;J3KTH7	Q9Y613	FH1/FH2 domain-containing protein 1	FHOD1
NaN	NaN	0.51248	NaN	NaN	NaN			2	2	2	1.6	1.6	1.6	150.83	4.9884	76063000	18597000	57466000	0	0.41248	0	NaN	Q29RF7;H0Y9L9;Q9NTI5-4;Q9NTI5-3;Q29RF7-3;Q9NTI5-2;Q9NTI5	Q29RF7;H0Y9L9;Q9NTI5-4;Q9NTI5-3;Q29RF7-3;Q9NTI5-2;Q9NTI5	Sister chromatid cohesion protein PDS5 homolog A;Sister chromatid cohesion protein PDS5 homolog B	PDS5A;PDS5B
0.77484	0.444773	0.313594	-0.231227	-0.409163	-2.31962			10	10	10	60.2	60.2	60.2	11.367	65.329	67096000000	36143000000	30953000000	1.01911	0.411069	0.60989	-1.08667	P62805	P62805	Histone H4	HIST1H4A
0.740366	0.246591	0.543892	NaN	NaN	-1.16207			5	1	1	25	8.1	8.1	15.43	3.5823	683580000	303960000	379620000	0.984258	0.410283	0	-1.26207	Q5TEC6	Q5TEC6	Histone H3	HIST2H3PS2
NaN	NaN	0.510253	NaN	NaN	-1.66818			2	2	2	6.4	6.4	6.4	62.595	15.418	90054000	52199000	37856000	0	0.410253	0	-1.76818	Q96A19	Q96A19	Coiled-coil domain-containing protein 102A	CCDC102A
NaN	NaN	0.509949	NaN	NaN	NaN			33	1	0	66.4	3	0	70.379	2.989	38992000	10618000	28375000	0	0.409949	0	NaN	O15231-7	O15231-7	Zinc finger protein 185	ZNF185
0.422879	0.585828	NaN	NaN	1.23652	1.26586			4	4	4	13.1	13.1	13.1	33.712	7.203	243050000	82396000	160650000	0.897636	0.404353	2.09095	1.15119	Q14232;F5H0D0;Q14232-2;H0YGG4	Q14232;F5H0D0;Q14232-2;H0YGG4	Translation initiation factor eIF-2B subunit alpha	EIF2B1
0.53665	0.485942	0.489132	0.154583	0.216734	-0.000331879	+		61	40	39	74.1	50.9	49.7	104.85	323.31	54096000000	21857000000	32240000000	2.78412	0.403908	0.125485	0.0236619	O43707;O43707-2;F5GXS2;O43707-3;H7C144;K7EJH8;K7EP19	O43707;O43707-2	Alpha-actinin-4	ACTN4
0.513289	0.444455	0.545968	NaN	NaN	NaN	+		3	3	3	5.2	5.2	5.2	69.652	6.4717	148530000	55438000	93093000	2.25856	0.401237	0	NaN	Q6UVY6;Q6UVY6-2;A6PVS1	Q6UVY6;Q6UVY6-2	DBH-like monooxygenase protein 1	MOXD1
0.429	0.657	0.416191	NaN	NaN	0.876959			2	2	2	6.1	6.1	6.1	27.423	3.052	195530000	81351000	114180000	1.44304	0.40073	0	0.776959	Q9UI43;E9PGN6	Q9UI43;E9PGN6	rRNA methyltransferase 2, mitochondrial	FTSJ2
0.424707	0.575119	NaN	NaN	-0.0860326	NaN			4	4	4	20.6	20.6	20.6	28.147	10.318	471680000	192250000	279430000	0.926877	0.399913	0	-0.186033	Q15773;F5H0Y3;F5H7L5;F5H800	Q15773;F5H0Y3	Myeloid leukemia factor 2	MLF2
0.514198	0.394514	0.590434	0.355918	0.31429	0.343919		+	49	49	49	54.7	54.7	54.7	116.2	310.98	26835000000	10124000000	16711000000	1.70448	0.399715	2.57026	0.238043	O94832;K7EIG7;J3QRN6;J3KRL0;J3QRR2	O94832;K7EIG7;J3QRN6	Unconventional myosin-Id	MYO1D
0.559541	0.575796	0.349139	0.944109	1.06729	1.551			19	19	19	52.9	52.9	52.9	60.343	213.06	7942500000	4813900000	3128600000	1.48783	0.394825	1.55591	1.08747	P17987;E7EQR6;F5H282;E7ERF2;F5GZ03;F5GZI8;F5GYL4;F5H136;F5H726;F5H676;F5H7Y1	P17987;E7EQR6;F5H282;E7ERF2	T-complex protein 1 subunit alpha	TCP1
0.416732	0.429857	0.623399	-1.16683	-1.49208	-1.74463			18	18	7	33.7	33.7	15.3	80.64	249.37	13078000000	5338300000	7739300000	1.55107	0.389996	1.95127	-1.56785	P06396-2;A0A0A0MS51;A0A0A0MT01;P06396-4;P06396-3;P06396;Q5T0I0;Q5T0I1;A0A0U1RQL8;REV__H0YJM7;REV__Q6TDU7-4;REV__Q6TDU7-2;REV__Q6TDU7-3;REV__Q6TDU7;REV__F8W8F9	P06396-2;A0A0A0MS51;A0A0A0MT01;P06396-4;P06396-3;P06396	Gelsolin	GSN
0.450063	0.631616	0.38648	0.0628125	0.178874	-0.209311			7	7	7	37.9	37.9	37.9	22.683	38.21	8637200000	4208600000	4428600000	1.47128	0.389386	0.284664	-0.0892083	H0YD13;P16070-18;P16070-12;P16070-14;P16070-13;P16070-11;P16070-10;P16070-16;P16070-8;P16070-17;P16070-6;P16070-4;P16070-3;P16070-7;P16070-5;P16070;H0Y2P0;H0YE40;H0YDW7;H0YCV9;H0Y5E4;P16070-15;P16070-9;E9PKC6;H0YDX6;H0YD17;Q86UZ1;J3KN83;P16070-19	H0YD13;P16070-18;P16070-12;P16070-14;P16070-13;P16070-11;P16070-10;P16070-16;P16070-8;P16070-17;P16070-6;P16070-4;P16070-3;P16070-7;P16070-5;P16070;H0Y2P0;H0YE40	CD44 antigen	CD44
0.383718	0.606158	0.474981	-0.299578	-0.140619	-0.525268			7	7	5	16.2	16.2	11.7	62.735	41.112	1476100000	665820000	810280000	1.57599	0.388286	1.19788	-0.421822	Q9Y625;A0A087WT82	Q9Y625	Glypican-6;Secreted glypican-6	GPC6
0.161952	0.446786	0.846072	0.193583	0.0156403	0.134089			12	12	12	27.5	27.5	27.5	72.757	88.458	994410000	352430000	641980000	0.716925	0.384937	0.0923657	0.0144374	O95905;O95905-3;O95905-2;C9J316;C9JGV1;F2Z2R1	O95905;O95905-3;O95905-2;C9J316;C9JGV1	Protein SGT1	ECD
0.482642	0.468323	0.502229	0.583326	0.227002	-0.124	+		5	5	5	37.3	37.3	37.3	18.237	18.192	614900000	272810000	342100000	3.18513	0.384398	0.227156	0.128776	Q9Y3C6	Q9Y3C6	Peptidyl-prolyl cis-trans isomerase-like 1	PPIL1
0.481609	NaN	NaN	1.52622	NaN	NaN			2	2	2	1.9	1.9	1.9	102.11	2.8615	116490000	51641000	64848000	0	0.381609	0	1.42622	O14936-3;O14936-4;O14936-6;O14936-2;O14936;Q5JS79;Q5JS72;Q5JS74;O14936-5	O14936-3;O14936-4;O14936-6;O14936-2;O14936;Q5JS79;Q5JS72;Q5JS74;O14936-5	Peripheral plasma membrane protein CASK	CASK
0.516419	0.312781	0.61551	0.405992	0.70186	0.576861			17	17	15	56.9	56.9	51	46.153	245.28	10576000000	4389600000	6185900000	1.29716	0.38157	1.4838	0.461571	P60842;J3KT12;P60842-2;J3QS69;J3KTB5;J3QL43;J3KSZ0;J3QR64;E7EQG2;Q14240;Q14240-2;J3KTN0;J3QLN6;J3KS25;J3QKZ9;J3KS93;J3KSN7;J3KT04;J3QQP0;E7EMV8	P60842;J3KT12;P60842-2;J3QS69;J3KTB5;J3QL43;J3KSZ0	Eukaryotic initiation factor 4A-I	EIF4A1
0.236217	0.558855	0.639788	0.133564	-0.342671	-0.103364			4	4	4	15.3	15.3	15.3	42.592	29.568	631640000	297870000	333770000	1.03716	0.378287	0.559343	-0.204157	P39748;P39748-2;I3L3E9;F5H1Y3	P39748;P39748-2;I3L3E9;F5H1Y3	Flap endonuclease 1	FEN1
0.317999	0.559345	0.541911	0.0399806	0.227125	0.225152			18	18	16	44.5	44.5	41.8	61.386	146.11	13803000000	4762600000	9040000000	1.3899	0.373085	0.386941	0.0640857	J3QRU1;P07947;P06241-3;P06241-2;P12931;P06241;P12931-2;E5RFS5;Q5TGY6;Q573B4;P06239;P09769;P06239-3	J3QRU1;P07947	Non-specific protein-tyrosine kinase;Tyrosine-protein kinase Yes	YES1
0.607863	0.366812	0.436588	1.97431	2.12869	2.24607		+	8	8	8	34.6	34.6	34.6	25.206	16.944	1278300000	383120000	895130000	1.45097	0.370421	2.81825	2.01636	P62993;P62993-2;J3KT38;J3QRL5;J3QLF6	P62993;P62993-2;J3KT38	Growth factor receptor-bound protein 2	GRB2
0.500598	0.649661	0.248535	-0.178143	0.183201	-0.670038			5	4	4	17.8	16	16	45.57	58.576	1065500000	542590000	522930000	1.05179	0.366265	0.49079	-0.32166	Q8WXF1-2;Q8WXF1;X6RDA4	Q8WXF1-2;Q8WXF1;X6RDA4	Paraspeckle component 1	PSPC1
0.517225	0.293488	0.58323	-0.118273	0.132906	-0.467713			11	11	11	7	7	7	210.13	42.912	1089300000	461550000	627770000	1.27379	0.364648	0.543338	-0.251027	A6NNN6;E7ETA6;Q15154-2;Q15154;H0YBA1;E9PGW9;E7EV93;Q15154-3;E5RGQ4	A6NNN6;E7ETA6;Q15154-2;Q15154	Pericentriolar material 1 protein	PCM1
0.492622	0.464668	0.432746	0.095587	-0.223104	0.159371	+		21	21	21	26.8	26.8	26.8	110.24	92.161	4839100000	2310800000	2528300000	2.64614	0.363345	0.276721	-0.0893822	Q5M775-4;Q5M775;Q5M775-5;Q5M775-3;Q5M775-2;J3KSG2;J3QQM0;J3KRN9;J3QS22	Q5M775-4;Q5M775;Q5M775-5;Q5M775-3;Q5M775-2;J3KSG2	Cytospin-B	SPECC1
0.475604	0.408277	0.501108	1.71458	1.97174	1.81549	+	+	13	13	13	40.8	40.8	40.8	51.156	58.004	2749300000	1004900000	1744400000	2.23577	0.361663	2.7314	1.73394	Q9Y230;Q9Y230-2;M0R0Y3;X6R2L4;M0QXI6;M0R0Z0	Q9Y230;Q9Y230-2;M0R0Y3	RuvB-like 2	RUVBL2
0.482229	0.440421	0.457542	-0.333171	-0.345161	-0.387468	+	+	39	39	39	56.8	56.8	56.8	69.842	323.31	67026000000	31773000000	35253000000	2.94544	0.360064	2.88407	-0.455267	P12956;B1AHC9;P12956-2	P12956;B1AHC9;P12956-2	X-ray repair cross-complementing protein 6	XRCC6
0.317188	0.433707	0.627887	0.609944	0.70115	1.51546			6	6	6	5.1	5.1	5.1	131.76	9.2636	396550000	150520000	246030000	1.23632	0.359594	1.00149	0.842185	J3KR24;P41252;A0A0A0MSX9;Q5TCD1	J3KR24;P41252;A0A0A0MSX9	Isoleucine--tRNA ligase, cytoplasmic	IARS
0.575796	0.341303	NaN	NaN	0.162597	-2.15882			4	2	2	31.2	18.8	18.8	13.509	4.5189	675460000	367530000	307940000	0.696374	0.358549	0.285974	-1.09811	Q71UI9;P0C0S5;C9J0D1;Q71UI9-3;Q71UI9-4;Q71UI9-2;C9J386	Q71UI9;P0C0S5;C9J0D1;Q71UI9-3;Q71UI9-4;Q71UI9-2;C9J386	Histone H2A.V;Histone H2A.Z;Histone H2A	H2AFV;H2AFZ
0.381283	-0.0417884	1.01963	0.561888	0.521553	0.257614			11	10	10	34.8	31.9	31.9	44.179	44.251	4113800000	1054800000	3059000000	0.430682	0.353042	1.1676	0.347019	P63092-3;P63092-2;P63092;P63092-4;Q5JWF2-2;Q5JWF2;S4R3E3;A0A0A0MR13;H0Y7F4;Q5JWE9;S4R3V9	P63092-3;P63092-2;P63092;P63092-4;Q5JWF2-2;Q5JWF2	Guanine nucleotide-binding protein G(s) subunit alpha isoforms short;Guanine nucleotide-binding protein G(s) subunit alpha isoforms XLas	GNAS
0.445303	0.466549	0.446256	0.0803847	0.0672257	-0.540484	+		7	7	7	16.9	16.9	16.9	51.893	20.571	1944400000	984980000	959470000	3.41378	0.352703	0.424198	-0.230958	Q86X51	Q86X51	Uncharacterized protein CXorf67	CXorf67
0.270708	0.0433446	1.04194	1.87712	1.67464	1.50004		+	13	13	13	14.7	14.7	14.7	126.27	31.275	900250000	309250000	591000000	0.438625	0.351999	2.32807	1.58393	Q93009-3;Q93009;H3BND8;F5H2X1	Q93009-3;Q93009;H3BND8	Ubiquitin carboxyl-terminal hydrolase 7;Ubiquitin carboxyl-terminal hydrolase	USP7
0.588996	NaN	0.309758	NaN	NaN	0.364236			5	5	5	8.9	8.9	8.9	96.022	30.185	155580000	56102000	99476000	0.61613	0.349377	0	0.264236	Q8WUM4;Q8WUM4-2;C9IZF9;Q8WUM4-3	Q8WUM4;Q8WUM4-2	Programmed cell death 6-interacting protein	PDCD6IP
NaN	0.444349	NaN	NaN	NaN	NaN			3	3	3	2.2	2.2	2.2	159	2.4802	620070000	339750000	280310000	0	0.344349	0	NaN	P54132;H0YNU5	P54132;H0YNU5	Bloom syndrome protein	BLM
0.40523	0.592828	0.332737	0.146916	0.210389	0.469678			8	6	6	36.8	29.6	29.6	28.302	44.282	1571700000	658740000	912980000	1.32525	0.343598	0.663236	0.175661	P61981	P61981	14-3-3 protein gamma;14-3-3 protein gamma, N-terminally processed	YWHAG
0.633199	0.364797	0.331361	-0.221606	NaN	-0.356569			4	4	4	19.1	19.1	19.1	27.295	13.187	214660000	113810000	100850000	1.15785	0.343119	0.961284	-0.389088	A2IDA3;P29372-5;P29372-4;P29372-2;P29372	A2IDA3;P29372-5;P29372-4;P29372-2;P29372	DNA-3-methyladenine glycosylase	MPG
0.606348	0.299479	0.420509	0.23352	0.98499	1.07649			6	6	1	10.9	10.9	1.5	68.047	16.398	474920000	163860000	311060000	1.20898	0.342112	0.884573	0.665	Q15046;H3BRC9	Q15046	Lysine--tRNA ligase	KARS
0.396379	0.403159	0.524264	-0.0774063	NaN	-0.169777			7	6	6	27.9	24.6	24.6	31.263	33.266	4729800000	558240000	4171500000	1.83868	0.341267	0.887136	-0.223592	Q13243;Q13243-3;B4DJK0;B4DUA4;G3V5K8;Q13243-2	Q13243;Q13243-3;B4DJK0;B4DUA4	Serine/arginine-rich splicing factor 5	SRSF5
0.403704	0.511367	0.405775	2.58878	2.88557	2.91474		+	11	11	11	37.8	37.8	37.8	44.205	39.39	2374800000	477030000	1897800000	1.9691	0.340282	2.82735	2.69636	J3KNW4;A0A0A0MSG2;Q14192;F8WDA8;U3KQT4;Q14192-2;C9J3S8	J3KNW4;A0A0A0MSG2;Q14192	Four and a half LIM domains protein 2	FHL2
NaN	NaN	0.439357	NaN	NaN	NaN			2	2	2	2.7	2.7	2.7	99.365	3.4366	30075000	12476000	17599000	0	0.339357	0	NaN	A0A0A0MTB8;Q8NI36	A0A0A0MTB8;Q8NI36	WD repeat-containing protein 36	WDR36
NaN	0.439357	NaN	0.390998	0.879	0.771209			14	3	1	20.4	5.6	1.2	72.572	8.5243	143490000	59997000	83493000	0	0.339357	1.22691	0.580402	Q5T9A4;Q5T9A4-3	Q5T9A4;Q5T9A4-3	ATPase family AAA domain-containing protein 3B	ATAD3B
1.23407	-0.0754896	0.15549	0.208767	NaN	NaN			3	3	3	18.1	18.1	18.1	23.954	9.1352	93646000	42171000	51474000	0.309442	0.338024	0	0.108767	K7EIU4;Q63ZY3-3;Q63ZY3;Q63ZY3-2	K7EIU4;Q63ZY3-3;Q63ZY3;Q63ZY3-2	KN motif and ankyrin repeat domain-containing protein 2	KANK2
0.437547	NaN	NaN	1.10949	1.17581	1.012		+	3	3	3	28.6	28.6	28.6	16.464	15.509	263410000	106080000	157330000	0	0.337547	2.64595	0.999101	A0A0U1RRH9;A0A0U1RRE1;G3V1Q4;E7ES33;E7EPK1;Q16181-2;Q16181;Q6ZU15	A0A0U1RRH9;A0A0U1RRE1;G3V1Q4;E7ES33;E7EPK1;Q16181-2;Q16181	Septin-7	2016-09-07
0.648742	0.282262	0.380175	-0.337284	-0.435417	-1.28384			7	7	3	50	50	32.6	14.914	21.313	40439000000	18551000000	21888000000	1.03912	0.33706	0.919129	-0.785515	K7EK07;P84243;Q71DI3;Q16695;P68431;K7EMV3;B4DEB1;K7ES00;Q6NXT2;K7EP01	K7EK07;P84243;Q71DI3;Q16695;P68431;K7EMV3;B4DEB1;K7ES00;Q6NXT2	Histone H3;Histone H3.3;Histone H3.2;Histone H3.1t;Histone H3.1;Histone H3.3C	H3F3B;H3F3A;HIST2H3A;HIST3H3;HIST1H3A;H3F3C
0.329526	0.406863	0.561888	0.857901	NaN	0.407625			1	1	1	11.6	11.6	11.6	15.736	8.6263	558480000	236290000	322180000	1.40167	0.332759	0.594251	0.532763	P27449	P27449	V-type proton ATPase 16 kDa proteolipid subunit	ATP6V0C
0.393087	0.113034	0.786178	0.642655	0.762391	0.516318			11	11	11	28	28	28	56.084	71.164	674610000	312910000	361700000	0.633943	0.330766	1.77355	0.540455	Q9P258	Q9P258	Protein RCC2	RCC2
0.48944	0.427713	0.371615	NaN	NaN	-1.69045			9	2	2	54.8	7.9	7.9	13.92	4.922	1221300000	679040000	542250000	1.97919	0.329589	0	-1.79045	Q16778;P33778;P23527;P06899;Q8N257;Q96A08;Q6DRA6;Q6DN03	Q16778;P33778;P23527;P06899;Q8N257	Histone H2B type 2-E;Histone H2B type 1-B;Histone H2B type 1-O;Histone H2B type 1-J;Histone H2B type 3-B	HIST2H2BE;HIST1H2BB;HIST1H2BO;HIST1H2BJ;HIST3H2BB
0.594549	0.311968	0.379288	-0.0557562	0.00891703	-0.461045			17	12	12	10.6	8.4	8.4	213.67	70.386	899400000	367610000	531790000	1.21359	0.328602	0.680772	-0.269295	Q9ULV0;Q7Z7A5;A0A0A0MR36;Q9ULV0-2;K7EPI3;Q9ULV0-3	Q9ULV0;Q7Z7A5	Unconventional myosin-Vb	MYO5B
0.426962	NaN	NaN	NaN	NaN	NaN			2	2	2	10.1	10.1	10.1	26.011	2.682	41764000	20516000	21248000	0	0.326962	0	NaN	H0YM70;A0A087X1Z3;Q9UL46	H0YM70;A0A087X1Z3;Q9UL46	Proteasome activator complex subunit 2	PSME2
0.333996	NaN	0.510456	NaN	NaN	NaN			2	2	2	8.9	8.9	8.9	27.368	6.6945	238910000	102940000	135970000	0.769181	0.322226	0	NaN	Q9BZM5;C9JAK3;Q6H3X3-2;Q5VY80;Q6H3X3	Q9BZM5;C9JAK3;Q6H3X3-2;Q5VY80;Q6H3X3	NKG2D ligand 2;Retinoic acid early transcript 1G protein;Retinoic acid early transcript 1L protein	ULBP2;RAET1G;RAET1L
0.389457	0.369271	0.502534	-0.0538232	-0.0814611	-0.00158784			30	30	30	67.9	67.9	67.9	48.879	258.4	29499000000	14290000000	15209000000	1.78676	0.320421	1.60379	-0.145624	P55084-2;P55084;F5GZQ3;B5MD38;C9JEY0;C9JE81;C9K0M0	P55084-2;P55084;F5GZQ3;B5MD38	Trifunctional enzyme subunit beta, mitochondrial;3-ketoacyl-CoA thiolase	HADHB
0.416299	NaN	NaN	NaN	NaN	NaN			2	2	2	2.6	2.6	2.6	101.21	4.7976	33475000	13106000	20368000	0	0.316299	0	NaN	Q13472-3;Q13472-2;Q13472;K7ELI7	Q13472-3;Q13472-2;Q13472;K7ELI7	DNA topoisomerase 3-alpha	TOP3A
0.44869	0.312201	0.485221	-0.0738942	-0.181837	-1.29036			6	6	6	49	49	49	12.259	46.22	897280000	487900000	409380000	1.57253	0.31537	0.594708	-0.615362	P84090;G3V279	P84090;G3V279	Enhancer of rudimentary homolog	ERH
0.414244	NaN	NaN	NaN	NaN	NaN			1	1	1	5.8	5.8	5.8	35.25	17.26	29191000	10678000	18513000	0	0.314244	0	NaN	Q8NEJ9-2;Q8NEJ9	Q8NEJ9-2;Q8NEJ9	Neuroguidin	NGDN
0.613909	0.417272	0.209516	NaN	NaN	NaN			6	1	1	57.7	8.5	8.5	14.105	10.405	138130000	76098000	62034000	0.938646	0.313565	0	NaN	Q93077;Q7L7L0;P04908	Q93077;Q7L7L0;P04908	Histone H2A type 1-C;Histone H2A type 3;Histone H2A type 1-B/E	HIST1H2AC;HIST3H2A;HIST1H2AB
0.544387	0.355129	0.318346	-0.118069	-0.0548867	-0.109546			180	152	142	70.6	62.8	59.8	229	323.31	597360000000	223110000000	374250000000	1.31338	0.305954	1.99	-0.194167	P35580;P35580-3;P35580-5;P35580-2;P35580-4;E7ERA5;H0Y6I0;Q13439-3;Q13439-4;Q13439;Q13439-5	P35580;P35580-3;P35580-5;P35580-2;P35580-4	Myosin-10	MYH10
0.310922	0.341758	0.563841	-0.373103	-0.32695	-0.807806			10	9	9	48.5	44.2	44.2	18.898	32.135	2444000000	1070400000	1373600000	1.20925	0.305507	1.2295	-0.60262	P46783;F6U211;S4R435;Q9NQ39	P46783;F6U211;S4R435;Q9NQ39	40S ribosomal protein S10;Putative 40S ribosomal protein S10-like	RPS10;RPS10-NUDT3;RPS10P5
NaN	0.404576	NaN	-0.236503	0.177471	0.109962			3	3	3	0.1	0.1	0.1	3994.6	3.1633	2941700000	1766600000	1175200000	0	0.304576	0.233788	-0.0830232	A0A0A0MTS7;Q8WZ42-11;Q8WZ42-4;Q8WZ42-7;Q8WZ42-2;Q8WZ42;Q8WZ42-8;Q8WZ42-13;Q8WZ42-12;Q8WZ42-5;A0A0A0MRA3;Q8WZ42-3;Q8WZ42-10;Q8WZ42-9	A0A0A0MTS7;Q8WZ42-11;Q8WZ42-4;Q8WZ42-7;Q8WZ42-2;Q8WZ42;Q8WZ42-8;Q8WZ42-13;Q8WZ42-12;Q8WZ42-5	Titin	TTN
0.333309	0.226508	0.652509	NaN	NaN	0.692427			4	4	4	3.9	3.9	3.9	118.38	5.2428	1971900000	772560000	1199300000	0.851841	0.304109	0	0.592427	H0Y8E4;E9PH70;Q9ULH0-2;Q9ULH0-4;Q9ULH0;Q9ULH0-3;H7C584	H0Y8E4;E9PH70;Q9ULH0-2;Q9ULH0-4;Q9ULH0;Q9ULH0-3	Kinase D-interacting substrate of 220 kDa	KIDINS220
0.393855	0.384381	0.430927	1.2199	1.49467	1.3065	+	+	7	7	7	11.6	11.6	11.6	84.87	29.621	923730000	332310000	591420000	2.65976	0.303055	2.37175	1.24035	P02786;G3V0E5;F8WBE5	P02786;G3V0E5	Transferrin receptor protein 1;Transferrin receptor protein 1, serum form	TFRC
0.402395	NaN	NaN	3.09036	3.3605	3.36191		+	12	12	12	47.1	47.1	47.1	37.895	108.9	4082900000	723380000	3359500000	0	0.302395	3.09169	3.17093	P13995;P13995-2;B9A062;B8ZZU9	P13995;P13995-2;B9A062;B8ZZU9	Bifunctional methylenetetrahydrofolate dehydrogenase/cyclohydrolase, mitochondrial;NAD-dependent methylenetetrahydrofolate dehydrogenase;Methenyltetrahydrofolate cyclohydrolase	MTHFD2
0.301822	0.468531	0.433814	0.470823	0.544288	0.357833			21	3	3	65.5	7.9	7.9	34.95	30.807	4486300000	2046800000	2439500000	1.56486	0.301389	1.65316	0.357648	F8VYE8;P36873;P36873-2;F8VR82;F8W0W8;A0A087WYY5	F8VYE8;P36873;P36873-2;F8VR82;F8W0W8;A0A087WYY5	Serine/threonine-protein phosphatase;Serine/threonine-protein phosphatase PP1-gamma catalytic subunit	PPP1CC
-0.760797	1.37568	0.586405	0.229219	0.501821	0.395721			6	6	6	33.5	33.5	33.5	21.834	17.548	2471600000	1568500000	903140000	0.169031	0.300429	1.13186	0.275587	Q9NUP9;G3V1D4;H0YIA8;O14910;H0YI92;J3KN23;Q9HAP6	Q9NUP9;G3V1D4;H0YIA8;O14910	Protein lin-7 homolog C;Protein lin-7 homolog A	LIN7C;LIN7A
0.394624	0.324235	0.471239	0.0067647	0.090447	-0.139808			31	31	31	41.4	41.4	41.4	104.55	226.62	7409900000	3171800000	4238100000	1.70198	0.296699	0.634944	-0.114199	P63010;P63010-2;P63010-3;A0A087X253;A0A087WU93;A0A087WZQ6;A0A087WYD1;Q10567-4;Q10567-3;Q10567-2;Q10567;C9J1E7;K7EN71;K7ERB2;K7EJX1;K7EJ01;A0A087WXS3;K7EKZ5;H7C034	P63010;P63010-2;P63010-3;A0A087X253;A0A087WU93;A0A087WZQ6;A0A087WYD1	AP-2 complex subunit beta	AP2B1
NaN	0.502127	0.282499	0.0480967	0.50019	0.635708			3	3	3	5.9	5.9	5.9	59.095	5.9098	161830000	67992000	93835000	0.64059	0.292313	0.62154	0.294665	P35240-4;P35240-6;P35240-5;P35240-8;P35240-3;P35240;P35240-2;P35240-10	P35240-4;P35240-6;P35240-5;P35240-8;P35240-3;P35240;P35240-2	Merlin	NF2
NaN	0.391768	NaN	NaN	NaN	NaN			4	4	4	22.2	22.2	22.2	18.82	6.6527	87910000	31390000	56520000	0	0.291768	0	NaN	Q9UFW8;C9JUJ0	Q9UFW8;C9JUJ0	CGG triplet repeat-binding protein 1	CGGBP1
0.389347	NaN	NaN	NaN	NaN	0.0709388			3	3	3	18.5	18.5	18.5	26.983	21.009	377050000	165670000	211380000	0	0.289347	0	-0.0290612	V9GY01;Q9Y448;Q9Y448-2	V9GY01;Q9Y448;Q9Y448-2	Small kinetochore-associated protein	KNSTRN
0.421695	0.443076	0.301354	-0.154313	-0.037488	-0.0555613			13	13	13	27.5	27.5	27.5	71.026	48.409	1827000000	780230000	1046800000	1.64671	0.288708	1.42725	-0.182454	Q9H0H5;H0YIK5;F8VRD2;F8VWX0;F8W0L1;F8VZ66;F8VV47;F8VWY4;F8VVE5;F8VYH6;F8VUW9;F8VV39;F8VQZ5;F8VS54;F8VV37;F8W1E5;F8VVY0;F8VXH1;F8VQF5;F8VZ41;F8W1T4	Q9H0H5	Rac GTPase-activating protein 1	RACGAP1
0.393746	0.372952	0.392207	3.56742	3.58099	3.46048	+	+	48	48	48	58.5	58.5	58.5	73.68	323.31	252790000000	44718000000	208070000000	3.2632	0.286302	3.91017	3.4363	P38646;D6RJI2;H0YBG6;D6RA73;H0Y8S0	P38646	Stress-70 protein, mitochondrial	HSPA9
0.513086	0.359521	0.285816	1.65168	1.67568	1.87657		+	7	7	7	32	32	32	35.594	37.45	1354300000	471700000	882600000	1.29572	0.286141	2.72192	1.63464	P67775;P62714;P67775-2;E5RHC1;H0YC23;E5RFI3;E5RHP4;E7ESG8;H0YBN9;H3BV22;H3BTA2;P60510	P67775;P62714;P67775-2;E5RHC1	Serine/threonine-protein phosphatase 2A catalytic subunit alpha isoform;Serine/threonine-protein phosphatase 2A catalytic subunit beta isoform;Serine/threonine-protein phosphatase	PPP2CA;PPP2CB
NaN	0.384492	NaN	NaN	NaN	NaN			8	3	3	13	4	4	107.47	11.574	183130000	73476000	109650000	0	0.284492	0	NaN	Q14151;K7EII0	Q14151	Scaffold attachment factor B2	SAFB2
0.325732	0.381394	0.445833	0.766977	0.534261	0.122341			12	12	12	19.5	19.5	19.5	104.85	44.615	1606800000	654270000	952480000	1.8365	0.28432	0.732218	0.374526	C9JZR2;O60716-24;O60716-23;O60716-21;O60716-19;O60716-22;O60716-20;O60716-16;O60716-18;O60716-15;O60716-17;O60716-13;O60716-11;O60716-14;O60716-12;O60716-10;O60716-8;O60716-9;O60716-7;O60716-5;O60716-3;O60716-6;O60716-4;O60716-2;O60716;O60716-32;O60716-31;O60716-29;O60716-27;O60716-30;O60716-28;O60716-26;O60716-25;E9PRE2;E9PKY0;E9PKL1	C9JZR2;O60716-24;O60716-23;O60716-21;O60716-19;O60716-22;O60716-20;O60716-16;O60716-18;O60716-15;O60716-17;O60716-13;O60716-11;O60716-14;O60716-12;O60716-10;O60716-8;O60716-9;O60716-7;O60716-5;O60716-3;O60716-6;O60716-4;O60716-2;O60716;O60716-32;O60716-31;O60716-29;O60716-27;O60716-30;O60716-28;O60716-26;O60716-25	Catenin delta-1	CTNND1
NaN	NaN	0.38416	NaN	NaN	NaN			36	1	1	87.7	6	6	36.471	33.535	431230000	152000000	279230000	0	0.28416	0	NaN	D6R9W4	D6R9W4		DBN1
0.537644	0.316841	0.297367	NaN	0.376068	0.389016			5	5	5	34	34	34	17.951	18.093	322530000	148850000	173690000	1.17792	0.283951	1.8361	0.282542	P36639-4;P36639-3;P36639-2;P36639;C9J361	P36639-4;P36639-3;P36639-2;P36639	7,8-dihydro-8-oxoguanine triphosphatase	NUDT1
-0.173059	NaN	0.936365	2.29128	2.66168	2.57737		+	9	9	9	12.5	12.5	12.5	119.77	96.872	820860000	573270000	247590000	0.154344	0.281653	2.66635	2.41011	P53396-2;P53396;P53396-3;K7EIE7	P53396-2;P53396;P53396-3	ATP-citrate synthase	ACLY
0.269632	0.594357	0.279293	NaN	NaN	NaN			4	4	4	9.5	9.5	9.5	73.421	7.6415	111780000	37511000	74269000	0.92494	0.281094	0	NaN	Q8N3R9-2;Q8N3R9;G3V2H1	Q8N3R9-2;Q8N3R9	MAGUK p55 subfamily member 5	MPP5
0.381062	NaN	NaN	NaN	NaN	NaN			4	4	4	6.3	6.3	6.3	113.86	5.6487	146460000	55333000	91127000	0	0.281062	0	NaN	Q6P4F7;H3BR51;Q3KRB8;Q6P4F7-2;Q6P4F7-3	Q6P4F7;H3BR51;Q3KRB8;Q6P4F7-2;Q6P4F7-3	Rho GTPase-activating protein 11A;Rho GTPase-activating protein 11B	ARHGAP11A;ARHGAP11B
0.276437	0.224164	0.634779	1.07929	0.915712	1.17153		+	12	12	12	19.7	19.7	19.7	109.13	58.031	1298800000	461510000	837310000	0.786168	0.27846	2.21665	0.955511	Q96H55;Q96H55-3;Q96H55-4;Q96H55-2;B4DSL5;A0A087WU55;A0A087WY49;A0A087WZQ9;A0A087WYT7	Q96H55;Q96H55-3;Q96H55-4;Q96H55-2	Unconventional myosin-XIX	MYO19
0.41846	0.307895	0.398679	0.00877379	0.369271	0.0163537			7	7	7	27.5	27.5	27.5	35.243	30.586	1759000000	843000000	916020000	1.82455	0.275011	0.0882592	0.0314662	P35250-2;P35250;H7C5P1;H7C5Q7;F8WC37;H7C5A0;H7C5G4;A0A087WVY3;H7C5S7;H7C5P4	P35250-2;P35250	Replication factor C subunit 2	RFC2
0.477781	0.226508	0.419647	1.92809	2.35733	2.47348		+	61	61	61	34.4	34.4	34.4	273.42	323.31	21332000000	8924000000	12408000000	1.16316	0.274645	2.23042	2.15296	P49327;A0A0U1RQF0;A0A0U1RRG3;J3KTF0	P49327;A0A0U1RQF0	Fatty acid synthase;[Acyl-carrier-protein] S-acetyltransferase;[Acyl-carrier-protein] S-malonyltransferase;3-oxoacyl-[acyl-carrier-protein] synthase;3-oxoacyl-[acyl-carrier-protein] reductase;3-hydroxyacyl-[acyl-carrier-protein] dehydratase;Enoyl-[acyl-carrier-protein] reductase;Oleoyl-[acyl-carrier-protein] hydrolase	FASN
0.596458	0.311736	0.199374	NaN	-0.392005	-1.31646			4	4	4	36.9	36.9	36.9	15.156	28.135	942910000	487230000	455680000	0.822709	0.269189	0.54186	-0.95423	J3QL05;J3KP15;Q01130-2;Q01130;Q9BRL6-2;Q9BRL6	J3QL05;J3KP15;Q01130-2;Q01130;Q9BRL6-2;Q9BRL6	Serine/arginine-rich splicing factor 2;Serine/arginine-rich splicing factor 8	SRSF2;SRSF8
NaN	0.369048	NaN	NaN	NaN	NaN			3	3	3	7	7	7	41.793	4.2554	132410000	77378000	55028000	0	0.269048	0	NaN	Q9H1I8-2;Q9H1I8-3;Q9H1I8;B1AH59	Q9H1I8-2;Q9H1I8-3;Q9H1I8;B1AH59	Activating signal cointegrator 1 complex subunit 2	ASCC2
NaN	NaN	0.368154	NaN	NaN	NaN			2	2	2	15.1	15.1	15.1	19.742	5.7159	113690000	52778000	60913000	0	0.268154	0	NaN	H0YGD6;H0YG47;Q96PU8-5;Q96PU8-9;Q96PU8-8;Q96PU8-6;Q96PU8-3;Q96PU8;F5GXS8;F5GYM3	H0YGD6;H0YG47;Q96PU8-5;Q96PU8-9;Q96PU8-8;Q96PU8-6;Q96PU8-3;Q96PU8;F5GXS8;F5GYM3	Protein quaking	QKI
NaN	0.362666	NaN	NaN	0.249142	0.407951			2	2	2	0.9	0.9	0.9	200.07	2.4221	3822800000	1436100000	2386600000	0	0.262666	0.671872	0.228546	Q5VW36	Q5VW36	Focadhesin	FOCAD
0.415326	0.311387	0.352194	0.543001	0.439357	0.494467		+	6	6	3	41.7	41.7	15.5	9.461	22.155	5380500000	2406700000	2973800000	1.87645	0.259636	2.23847	0.392275	P42677;Q5T4L4	P42677;Q5T4L4	40S ribosomal protein S27	RPS27
0.167743	0.617675	0.292075	NaN	1.03478	-0.918224			3	3	3	12.5	12.5	12.5	31.323	11.245	238880000	129390000	109490000	0.714249	0.259164	0.0119693	-0.0417224	Q53HL2	Q53HL2	Borealin	CDCA8
-0.0484421	0.92562	0.19497	1.314	1.76532	2.87076			12	1	1	16.3	1.7	1.7	71.027	5.4114	22023000000	4280400000	17743000000	0.326116	0.257382	1.25703	1.88336	P17066;P48741	P17066;P48741	Heat shock 70 kDa protein 6;Putative heat shock 70 kDa protein 7	HSPA6;HSPA7
0.177599	0.311387	0.583134	0.195348	0.357833	0.547746			14	14	14	28.1	28.1	28.1	75.555	113.34	3689400000	1518900000	2170500000	0.785991	0.257373	0.921253	0.266976	Q4KMQ1;H3BLU1;Q4KMQ1-2;Q4KMQ1-4;Q4KMQ1-3	Q4KMQ1;H3BLU1	Taperin	TPRN
0.402504	0.307195	NaN	NaN	0.0713507	0.0176369			5	5	5	47.3	47.3	47.3	12.405	14.462	347500000	166960000	180550000	0.929289	0.25485	0.542283	-0.0555062	Q7RTV0	Q7RTV0	PHD finger-like domain-containing protein 5A	PHF5A
0.419107	0.421695	0.221568	-0.0613755	-0.0222292	-0.157689			7	7	7	25.5	25.5	25.5	40.251	125.86	19633000000	9963800000	9669100000	1.20907	0.254123	1.33416	-0.180431	Q8NFJ5;F5GWG3	Q8NFJ5	Retinoic acid-induced protein 3	GPRC5A
0.450485	0.246834	NaN	NaN	NaN	NaN			4	4	4	8	8	8	110.36	10.243	226330000	101780000	124550000	0.606541	0.24866	0	NaN	A0A0A0MR66;P98175-4;P98175-3;P98175-2;P98175	A0A0A0MR66;P98175-4;P98175-3;P98175-2;P98175	RNA-binding protein 10	RBM10
0.262674	0.188781	0.588037	0.619929	-0.160137	0.472904			8	8	8	37.7	37.7	37.7	29.321	19.785	381150000	188150000	193000000	0.739552	0.246497	0.326861	0.210899	P78346;P78346-2;Q5VU10;Q5VU11	P78346;P78346-2;Q5VU10;Q5VU11	Ribonuclease P protein subunit p30	RPP30
0.281669	0.340619	0.413486	1.1123	1.00461	0.961623		+	20	20	6	37.2	37.2	13.5	66.217	134.08	13273000000	5433400000	7839200000	1.63227	0.245258	2.63209	0.926177	Q9NVI7-2;Q9NVI7;H0Y2W2;Q9NVI7-3;Q5SV16;Q5T9A4-2	Q9NVI7-2;Q9NVI7;H0Y2W2;Q9NVI7-3	ATPase family AAA domain-containing protein 3A	ATAD3A
NaN	0.344488	NaN	NaN	NaN	NaN			3	3	3	27.7	27.7	27.7	12.107	5.828	40593000	15989000	24604000	0	0.244488	0	NaN	Q96EL3;B9A051	Q96EL3	39S ribosomal protein L53, mitochondrial	MRPL53
0.151599	0.491494	0.388245	NaN	NaN	1.53341			4	4	4	42.9	42.9	42.9	10.079	9.6721	211360000	102520000	108850000	0.865389	0.243779	0	1.43341	Q96DA6-2;Q96DA6;F2Z3A7;G5E9V2	Q96DA6-2;Q96DA6;F2Z3A7	Mitochondrial import inner membrane translocase subunit TIM14	DNAJC19
0.463518	0.279412	0.271067	-0.268991	-0.348243	-0.519714			14	14	14	26.3	26.3	26.3	80.214	58.426	1806300000	825080000	981170000	1.19985	0.237999	1.63749	-0.478983	P08582;P08582-2;C9JVN1	P08582	Melanotransferrin	MFI2
0.468114	0.130008	0.410884	0.0869197	0.518636	0.389787			17	17	17	14.3	14.3	14.3	161.31	54.813	1853100000	733270000	1119900000	0.817946	0.236335	0.674125	0.231781	H0YNH8;Q9BZF9-2;Q9BZF9;F5H2B9;H0YN48;H0YMI1	H0YNH8;Q9BZF9-2;Q9BZF9;F5H2B9	Uveal autoantigen with coiled-coil domains and ankyrin repeats	UACA
0.702746	0.00891703	0.291839	NaN	NaN	0.329985			5	5	4	16.9	16.9	13.3	36.688	10.693	505310000	222520000	282790000	0.438382	0.234501	0	0.229985	P00338;P00338-3;P00338-5;P00338-2;F5GXY2;F5GYU2;P00338-4;F5GXH2;F5H5G7;F5H155;A0A087WUM2;G3XAP5;F5H245;Q6ZMR3;P07864	P00338;P00338-3;P00338-5;P00338-2;F5GXY2	L-lactate dehydrogenase A chain	LDHA
0.290542	0.250962	0.459117	-0.169858	-0.248879	-0.147921			36	36	26	48.1	48.1	36	105.36	253.58	8696600000	3555400000	5141200000	1.17242	0.23354	1.95564	-0.288886	O95782-2;O95782;E9PR62;A0A0G2JS17;A0A0G2JQT9;H0YEG0;H0YDE9;A0A0G2JRF9;A0A0G2JQA4;M0R2D9;E9PPZ3;E9PS94;E9PQP4;E9PNC4;E9PPY8;A0A0G2JRS3	O95782-2;O95782	AP-2 complex subunit alpha-1	AP2A1
NaN	0.333195	NaN	NaN	NaN	NaN			2	2	2	2.9	2.9	2.9	104.1	11.16	48241000	17903000	30337000	0	0.233195	0	NaN	Q99613-2;Q99613;B5ME19	Q99613-2;Q99613;B5ME19	Eukaryotic translation initiation factor 3 subunit C;Eukaryotic translation initiation factor 3 subunit C-like protein	EIF3C;EIF3CL
0.524264	NaN	0.131985	NaN	NaN	0.531369			2	2	2	4.3	4.3	4.3	83.549	11.199	113930000	43608000	70323000	0.344768	0.228124	0	0.431369	Q02809;Q02809-2	Q02809;Q02809-2	Procollagen-lysine,2-oxoglutarate 5-dioxygenase 1	PLOD1
NaN	0.376735	0.278698	NaN	NaN	NaN			3	3	3	3.2	3.2	3.2	143.35	6.873	71354000	23867000	47487000	0.869734	0.227717	0	NaN	Q8IY17-5;Q8IY17-2;Q8IY17-3;Q8IY17;Q8IY17-4	Q8IY17-5;Q8IY17-2;Q8IY17-3;Q8IY17;Q8IY17-4	Neuropathy target esterase	PNPLA6
0.494672	0.278223	0.207393	-0.189483	-0.357104	-2.45553			6	6	1	44.4	44.4	6.5	18.481	54.875	39430000000	24274000000	15157000000	0.921955	0.226763	0.568382	-1.10071	A0A0U1RR32;A0A0U1RRH7;Q99878;Q96KK5;Q9BTM1;P20671;P0C0S8;H0YFX9;Q16777;Q6FI13;Q9BTM1-2;P16104;Q96QV6;REV__H0Y672;REV__E7EQ67;REV__H7BY63;REV__Q8NB25-4;REV__Q8NB25-2;REV__A0A087X2A7;REV__Q8NB25-3;REV__Q8NB25;Q71UI9-5	A0A0U1RR32;A0A0U1RRH7;Q99878;Q96KK5;Q9BTM1;P20671;P0C0S8;H0YFX9;Q16777;Q6FI13;Q9BTM1-2;P16104;Q96QV6	Histone H2A type 1-J;Histone H2A type 1-H;Histone H2A.J;Histone H2A type 1-D;Histone H2A type 1;Histone H2A;Histone H2A type 2-C;Histone H2A type 2-A;Histone H2AX;Histone H2A type 1-A	HIST1H2AJ;HIST1H2AH;H2AFJ;HIST1H2AD;HIST1H2AG;HIST2H2AC;HIST2H2AA3;H2AFX;HIST1H2AA
0.40719	0.110096	0.458382	0.605305	0.74028	0.511468			9	9	9	36.9	36.9	36.9	26.224	34.694	1929000000	978640000	950380000	0.76008	0.225223	1.79644	0.519018	B5MDF5;J3KQE5;P62826;F5H018;H0YFC6;B4DV51	B5MDF5;J3KQE5;P62826;F5H018;H0YFC6	GTP-binding nuclear protein Ran	RAN
0.341986	0.294312	0.33754	1.714	1.75591	1.62887	+	+	7	7	7	25.2	25.2	25.2	34.834	32.34	815000000	313230000	501770000	2.34189	0.224613	3.26319	1.59959	P60891;B1ALA9;A0A0B4J207;P60891-2;P21108;P11908;P11908-2;B7ZB02;B1ALA7;A6NMS2;H7C540;D3YTJ7	P60891;B1ALA9;A0A0B4J207;P60891-2;P21108;P11908;P11908-2;B7ZB02	Ribose-phosphate pyrophosphokinase 1;Ribose-phosphate pyrophosphokinase 3;Ribose-phosphate pyrophosphokinase 2	PRPS1;PRPS1L1;PRPS2
0.475811	0.282736	0.211511	0.191057	0.469678	0.172744			7	7	7	16.7	16.7	16.7	72.759	56.246	616930000	262820000	354120000	0.976575	0.223353	0.687431	0.177826	Q9BRK4;Q9Y250-5;Q9Y250-4;Q9Y250-3;Q9Y250-2;Q9Y250	Q9BRK4	Leucine zipper putative tumor suppressor 2	LZTS2
0.451857	0.450485	0.0654344	1.25665	0.837297	1.20057			11	11	11	24.7	24.7	24.7	58.024	92.018	1163600000	698460000	465180000	0.646734	0.222592	1.77209	0.998171	P40227;P40227-2;Q92526-3;Q92526;Q92526-2	P40227;P40227-2	T-complex protein 1 subunit zeta	CCT6A
0.191184	0.410992	0.355918	0.164915	0.163756	0.305562			15	15	15	59.7	59.7	59.7	47.27	210.52	7175000000	3486100000	3688900000	1.09744	0.219365	0.848968	0.111411	H0Y8R1;F5H5I6;H0YAK1;Q12849;Q12849-5;H0YAM1	H0Y8R1;F5H5I6;H0YAK1;Q12849;Q12849-5	G-rich sequence factor 1	GRSF1
NaN	0.317999	NaN	NaN	NaN	NaN			2	2	2	3.5	3.5	3.5	77.429	6.4174	96739000	36193000	60546000	0	0.217999	0	NaN	Q8WYL5-2;Q8WYL5-5;Q8WYL5;F8W1D9;Q8WYL5-4	Q8WYL5-2;Q8WYL5-5;Q8WYL5;F8W1D9;Q8WYL5-4	Protein phosphatase Slingshot homolog 1	SSH1
NaN	0.314058	NaN	NaN	NaN	NaN			2	2	2	4.2	4.2	4.2	75.69	3.5306	12467000	3282000	9185000	0	0.214058	0	NaN	Q8NEM2	Q8NEM2	SHC SH2 domain-binding protein 1	SHCBP1
0.222928	0.437973	0.280481	0.512884	0.298072	0.626112			16	16	12	43	43	34.3	60.201	87.768	4167600000	1903800000	2263800000	1.09842	0.213794	1.23066	0.379023	A0A0A0MS52;Q13555-4;Q5SWX3;A0A0A0MT11;Q13555-10;Q13555-5;Q13555-2;Q13555-8;Q13555;Q13555-6;Q8WU40;Q13555-3;Q13555-7;Q13555-9;H0Y6G2;Q13554-7;Q13554-4;Q13554-6;Q13554-3;Q13554-8;Q13554-5;Q13554-2;Q13554;H7BXS4;Q9UQM7;Q9UQM7-2;E9PBE8;E7EQE4;H7BZC6;D6RHX9;D6RFJ0;E7ERS6;E7ETC9;H7C394	A0A0A0MS52;Q13555-4;Q5SWX3;A0A0A0MT11;Q13555-10;Q13555-5;Q13555-2;Q13555-8;Q13555;Q13555-6;Q8WU40;Q13555-3;Q13555-7;Q13555-9;H0Y6G2	Calcium/calmodulin-dependent protein kinase type II subunit gamma	CAMK2G
0.428571	0.196355	NaN	0.435202	0.53436	NaN			2	2	2	4.3	4.3	4.3	48.586	3.162	377330000	154020000	223310000	0.497028	0.212463	1.08842	0.384781	U3KQA5;A0A0U1RQT7;Q8IXA3;A0A0U1RQY7;U3KQB3;Q9HCP0-2;Q9HCP0;A0A087WZK4;A0A0U1RR31;A0A0U1RQG9;A0A0U1RQK6;A0A087WWF5;K7ESB6;Q9Y6M4-6;Q9Y6M4-5;P78368;Q9Y6M4-3;Q9Y6M4-4;Q9Y6M4;Q9Y6M4-2	U3KQA5;A0A0U1RQT7;Q8IXA3;A0A0U1RQY7;U3KQB3;Q9HCP0-2;Q9HCP0;A0A087WZK4;A0A0U1RR31;A0A0U1RQG9;A0A0U1RQK6;A0A087WWF5;K7ESB6;Q9Y6M4-6;Q9Y6M4-5;P78368;Q9Y6M4-3;Q9Y6M4-4;Q9Y6M4;Q9Y6M4-2	Casein kinase I isoform gamma-1;Casein kinase I isoform gamma-3;Casein kinase I isoform gamma-2	hCG_2004507;CSNK1G1;CSNK1G2;CSNK1G3
0.489029	0.253626	0.194717	0.443819	0.145873	-0.173173			6	6	5	9.1	9.1	7.7	78.832	20.031	741070000	341770000	399300000	0.847928	0.212458	0.0717914	0.0388397	Q9NVV4-2;Q9NVV4;Q5T852;Q5T851	Q9NVV4-2;Q9NVV4	Poly(A) RNA polymerase, mitochondrial	MTPAP
0.310573	NaN	NaN	NaN	-0.0228007	1.18998			2	2	2	16.5	16.5	16.5	14.306	5.2546	78013000	35431000	42582000	0	0.210573	0.243043	0.483591	H0YMM5;A0A0C4DGL3;H0YNJ9;H0YNW5;H0YKC5;H0YKI0;P33316-2;P33316;H0YMP1	H0YMM5;A0A0C4DGL3;H0YNJ9;H0YNW5;H0YKC5;H0YKI0;P33316-2;P33316;H0YMP1	Deoxyuridine 5-triphosphate nucleotidohydrolase, mitochondrial	DUT
0.331361	0.357721	0.239887	0.275603	-0.346206	-0.00620245			4	4	4	16	16	16	25.697	6.5283	355780000	174970000	180810000	1.55597	0.209656	0.254105	-0.125602	Q9P016;Q9P016-2	Q9P016;Q9P016-2	Thymocyte nuclear protein 1	THYN1
0.292075	0.433387	0.202261	-0.287008	-0.437584	-0.567575			16	16	16	34.1	34.1	34.1	68.137	117.42	2195000000	1004900000	1190100000	1.04733	0.209241	1.64695	-0.530722	P27694;I3L4R8;I3L524;I3L2M5	P27694	Replication protein A 70 kDa DNA-binding subunit;Replication protein A 70 kDa DNA-binding subunit, N-terminally processed	RPA1
0.465295	0.257614	0.188654	-0.166163	-0.24284	-2.10824			9	9	2	54.8	54.8	7.9	13.906	43.831	98158000000	55724000000	42434000000	0.87369	0.203855	0.557124	-0.93908	B2R4S9;U3KQK0;Q99879;Q99877;Q93079;Q5QNW6;P62807;P58876;O60814;Q5QNW6-2;P57053;Q99880	B2R4S9;U3KQK0;Q99879;Q99877;Q93079;Q5QNW6;P62807;P58876;O60814;Q5QNW6-2;P57053;Q99880	Histone H2B;Histone H2B type 1-M;Histone H2B type 1-N;Histone H2B type 1-H;Histone H2B type 2-F;Histone H2B type 1-C/E/F/G/I;Histone H2B type 1-D;Histone H2B type 1-K;Histone H2B type F-S;Histone H2B type 1-L	HIST1H2BI;HIST1H2BN;HIST1H2BM;HIST1H2BH;HIST2H2BF;HIST1H2BC;HIST1H2BD;HIST1H2BK;H2BFS;HIST1H2BL
0.439889	0.297837	0.173	0.087327	0.0318186	-0.0781524			7	7	7	15.4	15.4	15.4	59.763	23.001	1285000000	513390000	771590000	0.926376	0.203575	0.661954	-0.0863356	Q92828	Q92828	Coronin-2A	CORO2A
0.280362	0.257252	0.3639	-0.101645	-0.281369	-0.200448			8	8	8	24.8	24.8	24.8	35.277	51.437	6405500000	3433800000	2971800000	1.59998	0.200505	1.5264	-0.294487	O15479;O15481;Q96LZ2;P43366;Q9UBF1	O15479	Melanoma-associated antigen B2	MAGEB2
0.333653	NaN	0.262313	NaN	NaN	0.596267			3	3	3	2.7	2.7	2.7	99.692	7.6055	332740000	172390000	160350000	0.945079	0.197983	0	0.496267	A0JP02;B4DJX4;Q9HAU0-3;Q9HAU0-5;Q9HAU0-8;Q9HAU0;Q9HAU0-2;Q9HAU0-4;Q9HAU0-6	A0JP02;B4DJX4;Q9HAU0-3;Q9HAU0-5;Q9HAU0-8;Q9HAU0;Q9HAU0-2;Q9HAU0-4;Q9HAU0-6	Pleckstrin homology domain-containing family A member 5	PLEKHA5
-0.0608637	-0.0581274	1.00877	0.345056	NaN	0.201258			6	6	6	22.4	22.4	22.4	33.631	15.223	376140000	174290000	201850000	0.196309	0.196594	0.601106	0.173157	Q92600;Q92600-2;Q92600-3;F8WBZ6;H7C0W0	Q92600;Q92600-2;Q92600-3	Cell differentiation protein RCD1 homolog	RQCD1
0.291957	NaN	NaN	NaN	NaN	NaN			3	3	3	2	2	2	190.68	5.3027	22714000	5746100	16968000	0	0.191957	0	NaN	O00443	O00443	Phosphatidylinositol 4-phosphate 3-kinase C2 domain-containing subunit alpha	PIK3C2A
-0.0197699	0.652601	0.227371	-0.286867	0.0630888	-0.333625			7	7	7	22	22	22	61.494	67.897	1126200000	640130000	486050000	0.354605	0.186734	0.824293	-0.285801	Q13573;G3V3A4;G3V4X8;G3V5R3	Q13573;G3V3A4;G3V4X8	SNW domain-containing protein 1	SNW1
0.242328	0.262433	0.355129	0.235727	0.088413	0.235114			5	5	5	53.5	53.5	53.5	10.112	12.654	970400000	445700000	524700000	1.48224	0.18663	0.657848	0.0864182	P49458;E9PE20;P49458-2	P49458;E9PE20;P49458-2	Signal recognition particle 9 kDa protein	SRP9
0.271067	0.294312	0.293135	1.01078	0.499068	0.515107	+		11	9	9	40.4	37.3	37.3	29.174	100.74	1200500000	480610000	719850000	2.78388	0.186171	1.12055	0.574985	P62258;P62258-2;K7EM20;B4DJF2;I3L3T1;K7EIT4;I3L0W5;Q4VY20;A0A0J9YWZ2;Q4VY19;A0A0J9YWE8	P62258;P62258-2	14-3-3 protein epsilon	YWHAE
0.251325	0.241352	0.365245	0.404903	0.265557	0.250719			15	15	15	24	24	24	75.475	76.915	4801600000	1868500000	2933100000	1.36902	0.185974	1.28475	0.20706	P28288;P28288-2;P28288-3	P28288;P28288-2	ATP-binding cassette sub-family D member 3	ABCD3
0.27023	0.120352	0.464982	-0.0107883	-0.291345	-0.597649			7	7	6	34.6	34.6	29.8	24.544	20.692	847450000	460320000	387140000	0.689179	0.185188	0.847014	-0.399927	M0R0P1;M0R299;M0QXL5;M0R2Q4;P22087;M0R2U2;M0R1H0;M0R2B0	M0R0P1;M0R299;M0QXL5;M0R2Q4;P22087;M0R2U2;M0R1H0;M0R2B0	rRNA 2-O-methyltransferase fibrillarin	FBL
0.280244	0.304277	0.267596	-0.41473	-0.218749	-0.42401	+		14	14	14	40.4	40.4	40.4	47.064	49.697	2465200000	1062000000	1403200000	2.46859	0.184039	1.674	-0.452496	Q14254;J3QLD9;E7EMK3;K7EKW9	Q14254;J3QLD9;E7EMK3	Flotillin-2	FLOT2
0.283448	NaN	NaN	NaN	NaN	NaN			5	3	3	12.6	9.1	9.1	54.91	7.866	451600000	239050000	212550000	0	0.183448	0	NaN	O75487-2;O75487	O75487-2;O75487	Glypican-4;Secreted glypican-4	GPC4
0.396379	0.269871	0.172744	0.305445	0.626579	0.553852			9	9	9	8.5	8.5	8.5	148.85	27.892	388730000	150860000	237870000	0.962461	0.179664	1.25572	0.395292	Q9BQG0;Q9BQG0-2;I3L1L3	Q9BQG0;Q9BQG0-2;I3L1L3	Myb-binding protein 1A	MYBBP1A
0.361544	0.194465	0.282262	0.070252	0.122474	0.229957			119	104	2	58.9	54.3	1.6	281.63	323.31	68713000000	26450000000	42263000000	1.18497	0.179424	0.322303	0.0408943	O75369-8	O75369-8	Filamin-B	FLNB
0.217975	0.338795	NaN	NaN	NaN	NaN			2	2	2	2	2	2	122.86	2.7836	40955000	20786000	20169000	0.6822	0.178385	0	NaN	A0A0A0MRP6;B7ZLQ5;P28370-2;O60264;P28370	A0A0A0MRP6;B7ZLQ5;P28370-2;O60264;P28370	Probable global transcription activator SNF2L1;SWI/SNF-related matrix-associated actin-dependent regulator of chromatin subfamily A member 5	SMARCA1;SMARCA5
0.0712136	0.721154	0.0419438	NaN	NaN	NaN			6	6	6	11	11	11	96.557	24.454	191290000	71630000	119660000	0.295808	0.178104	0	NaN	Q8IY81;J3KS36;J3QSE2	Q8IY81	pre-rRNA processing protein FTSJ3	FTSJ3
0.271784	0.177089	0.384271	0.337083	0.335598	0.459746			9	9	9	16.5	16.5	16.5	83.267	69.52	1463800000	617920000	845860000	1.01208	0.177715	1.67201	0.277476	Q12797-10;Q12797;E5RHJ2;E5RHK2;G3XAN5;E5RG29;A0A0A0MSK8;E5RG56;Q12797-7;Q12797-4;Q12797-3;Q12797-9;Q12797-6;Q12797-5;Q12797-8;Q12797-2	Q12797-10;Q12797	Aspartyl/asparaginyl beta-hydroxylase	ASPH
0.350724	0.221073	0.258941	2.59884	NaN	-0.248502			5	5	5	38.1	38.1	38.1	12.254	12.75	1266000000	514220000	751760000	1.35438	0.176912	0.230462	1.07517	Q9Y3U8;J3QSB5;J3KTD3	Q9Y3U8;J3QSB5	60S ribosomal protein L36	RPL36
0.27608	NaN	NaN	NaN	0.659194	0.826681			1	1	1	3.4	3.4	3.4	27.676	2.4018	92047000	36738000	55309000	0	0.17608	1.08378	0.642937	Q13425-2;Q13425	Q13425-2;Q13425	Beta-2-syntrophin	SNTB2
0.272143	0.0614305	0.490467	NaN	NaN	0.520146			4	4	4	7.2	7.2	7.2	81.749	10.373	399790000	188240000	211550000	0.531846	0.17468	0	0.420146	Q8TED9-2;Q8TED9;Q8TED9-3;Q8TED9-4;Q8N556;Q8N556-2	Q8TED9-2;Q8TED9;Q8TED9-3	Actin filament-associated protein 1-like 1	AFAP1L1
0.126444	0.404794	0.292546	0.0321009	0.157949	0.29678			12	12	12	43	43	43	39.681	110.9	2616600000	1094800000	1521700000	0.786654	0.174595	0.300332	0.0622768	P35249;C9JZI1;P35249-2;C9J8M3;C9JTT7;H7C1P0;C9JXZ7;C9JGY5;F8WE44	P35249;C9JZI1;P35249-2;C9J8M3;C9JTT7	Replication factor C subunit 4	RFC4
0.438719	0.592923	-0.218112	-0.265431	0.018919	-0.116958			14	9	7	5.7	4.1	3.4	308.06	21.503	311870000	147950000	163930000	0.250009	0.171177	0.940706	-0.221157	Q14571	Q14571	Inositol 1,4,5-trisphosphate receptor type 2	ITPR2
0.235482	0.36087	0.215989	2.32288	2.21887	2.36681		+	7	7	7	25.1	25.1	25.1	45.809	54.663	1997600000	539560000	1458000000	1.19415	0.17078	3.40202	2.20286	O14965;A3KFJ0;Q5QPD4;A3KFJ1;Q5QPD2	O14965;A3KFJ0;Q5QPD4	Aurora kinase A	AURKA
0.211386	0.23634	0.361207	0.488926	0.269871	0.27965			31	31	29	49.2	49.2	48.3	89.333	323.31	32725000000	14629000000	18096000000	1.17266	0.169644	1.12551	0.246149	D3DTX6;Q96SB3	D3DTX6;Q96SB3	Neurabin-2	PPP1R9B
0.429857	-0.0801642	0.450802	2.06454	2.25205	2.0898		+	5	5	5	21.8	21.8	21.8	25.838	18.821	970050000	332720000	637330000	0.358567	0.166832	3.07988	2.03546	P30048-2;P30048	P30048-2;P30048	Thioredoxin-dependent peroxide reductase, mitochondrial	PRDX3
0.616828	0.10165	0.0807941	NaN	0.224905	-1.10086			4	4	4	39.3	39.3	39.3	16.131	12.367	268840000	123130000	145710000	0.353941	0.166424	0.247199	-0.537975	Q5EBL8;Q5EBL8-2	Q5EBL8;Q5EBL8-2	PDZ domain-containing protein 11	PDZD11
0.429	0.23131	0.131721	-0.970809	0.755571	-1.71255			5	5	5	43.8	43.8	43.8	14.173	17.196	434810000	247770000	187040000	0.696239	0.16401	0.380212	-0.742596	P55769;B1AHD1	P55769;B1AHD1	NHP2-like protein 1;NHP2-like protein 1, N-terminally processed	NHP2L1
0.170181	0.415001	0.199876	0.344601	0.422986	0.427928			6	6	6	67.4	67.4	67.4	19.343	73.668	9244200000	707430000	8536800000	0.766937	0.161686	2.09279	0.298505	O75607	O75607	Nucleoplasmin-3	NPM3
0.295135	0.240009	0.249263	0.26135	-0.0746082	-0.0382582			7	7	7	41.2	41.2	41.2	14.57	46.593	2532700000	1258800000	1273800000	1.96024	0.161469	0.166264	-0.0505053	P37108;H0YLA2	P37108;H0YLA2	Signal recognition particle 14 kDa protein	SRP14
0.3667	0.27858	0.138814	0.795684	0.697685	0.740712		+	6	5	5	38.2	32.5	32.5	21.258	22.038	1239200000	514350000	724890000	0.868008	0.161365	2.71456	0.644693	P60953;P60953-1;Q5JYX0	P60953;P60953-1;Q5JYX0	Cell division control protein 42 homolog	CDC42
0.168129	0.35242	NaN	1.82948	1.72552	2.0858		+	6	3	3	9.9	5	5	82.968	8.038	175550000	50283000	125270000	0.478634	0.160274	2.44409	1.78027	F5H365;Q15436;G3V4V1;G3V1W4;G3V3G5;G3V2R6;G3V5X8;G3V4Q2;G3V5K1;Q15436-2	F5H365;Q15436;G3V4V1;G3V1W4;G3V3G5;G3V2R6;G3V5X8;G3V4Q2	Protein transport protein Sec23A	SEC23A
0.17031	NaN	0.347439	0.789187	0.247198	0.608525			6	6	6	2.3	2.3	2.3	358.2	13.654	289850000	124430000	165420000	0.48979	0.158874	0.972605	0.448304	P49792;J3KQ37;J3KNE0;A6NKT7;Q99666;O14715;F8VYC4;P0DJD0;P0DJD1;Q7Z3J3;F8W705;Q99666-2	P49792;J3KQ37;J3KNE0;A6NKT7;Q99666;O14715	E3 SUMO-protein ligase RanBP2;RanBP2-like and GRIP domain-containing protein 3;RANBP2-like and GRIP domain-containing protein 5/6;RANBP2-like and GRIP domain-containing protein 8	RANBP2;RGPD8;RGPD3;RGPD5
0.177089	NaN	0.340391	4.0072	2.78829	4.06738			42	42	42	34.5	34.5	34.5	153.89	298.85	5743100000	389560000	5353600000	0.519354	0.15874	1.86269	3.52095	Q92878;Q92878-2;Q92878-3;E7EN38;E7ESD9;C9JNH8;E9PM98;H7C0P8;H7C0V2	Q92878;Q92878-2;Q92878-3;E7EN38	DNA repair protein RAD50	RAD50
0.293253	0.174918	0.307895	0.0640551	0.0247452	-0.0989536			15	15	15	47.8	47.8	47.8	44.965	133.69	7049200000	3434500000	3614700000	1.1957	0.158688	0.76972	-0.103384	Q8NC51;Q8NC51-3;Q8NC51-2;Q8NC51-4	Q8NC51;Q8NC51-3;Q8NC51-2;Q8NC51-4	Plasminogen activator inhibitor 1 RNA-binding protein	SERBP1
0.301236	0.390338	0.0833836	0.895535	0.309176	-0.620734			6	6	6	25	25	25	19.526	16.867	414090000	242030000	172060000	0.648573	0.158319	0.070537	0.0946592	X6RAL5;O00422;H7BZW6;U3KPY7;U3KQ12	X6RAL5;O00422;H7BZW6;U3KPY7	Histone deacetylase complex subunit SAP18	SAP18
0.106348	0.278698	0.387252	0.777451	0.49334	0.835358			5	5	5	30.9	30.9	30.9	26.743	62.621	1596000000	656590000	939380000	0.711961	0.157433	1.53076	0.60205	A0A087WX29;Q13148;B1AKP7;G3V162;A0A087X260;A0A087WYY0;A0A087WXQ5;K7EJM5;A0A087WV68;K7EN94;Q13148-4;A0A087WW61;A0A087WX67;A0A087WXV3;A0A087WTZ4;K7EL26;K7EJ99;A0A0A0MSV7;A0A087WYE7;A0A087WZC9	A0A087WX29;Q13148;B1AKP7;G3V162;A0A087X260;A0A087WYY0;A0A087WXQ5;K7EJM5;A0A087WV68;K7EN94;Q13148-4	TAR DNA-binding protein 43	TARDBP
NaN	NaN	0.253747	NaN	NaN	NaN			2	2	2	1.3	1.3	1.3	224.29	5.124	53549000	22025000	31524000	0	0.153747	0	NaN	Q7RTP6;Q7RTP6-2;Q7RTP6-4;Q7RTP6-3;Q7RTP6-5	Q7RTP6;Q7RTP6-2;Q7RTP6-4;Q7RTP6-3;Q7RTP6-5	Protein-methionine sulfoxide oxidase MICAL3	MICAL3
0.32458	0.212134	0.219835	0.0241777	0.0229004	0.0563061			66	66	63	37.2	37.2	36.4	241.41	323.31	28637000000	11782000000	16855000000	1.28091	0.152183	1.57354	-0.0655386	H0Y7L2;Q96N67-4;Q96N67-3;Q96N67-5;Q96N67-2;Q96N67-6;Q96N67;A0A0C4DGY6;Q96N67-7;A0A0U1RQT6;A0A0U1RRC1;A0A0U1RQJ5;A2A369;Q8NF50-4;Q8NF50-3;Q8NF50-2;Q8NF50;A0A0U1RQG7;A0A0U1RR97	H0Y7L2;Q96N67-4;Q96N67-3;Q96N67-5;Q96N67-2;Q96N67-6;Q96N67	Dedicator of cytokinesis protein 7	DOCK7
0.0862402	0.00762616	0.660837	-0.454684	-0.314517	-0.821993			10	10	10	26.7	26.7	26.7	49.526	35.197	1379400000	515570000	863840000	0.269003	0.151568	1.27519	-0.630398	A0A087WY71;Q96CW1-2;Q96CW1;E9PFW3;C9JJ47;C9JGT8;C9JJD3;C9JTK4;C9JPV8;H7C4C3	A0A087WY71;Q96CW1-2;Q96CW1;E9PFW3;C9JJ47;C9JGT8	AP-2 complex subunit mu	AP2M1
0.208642	0.230941	0.312317	2.54419	2.61433	2.63568		+	23	23	23	81	81	81	32.004	266.42	78612000000	21639000000	56972000000	1.38646	0.150633	3.91233	2.49807	Q96HS1;Q96HS1-2;F5GXG4	Q96HS1;Q96HS1-2	Serine/threonine-protein phosphatase PGAM5, mitochondrial	PGAM5
0.285698	0.177854	0.285225	-0.0423528	0.177854	-0.150385			23	23	23	30.1	30.1	30.1	122.29	195.94	7319200000	3222900000	4096300000	1.27598	0.149592	0.408186	-0.104961	Q14126;J3KSI6	Q14126	Desmoglein-2	DSG2
0.156138	0.403159	0.189034	-0.0433188	-0.176544	-0.0199016			6	6	6	41.2	41.2	41.2	18.742	29.748	579400000	293140000	286260000	0.713523	0.149443	1.17858	-0.179922	P62633-2;P62633;P62633-7;P62633-3;P62633-8;P62633-5;P62633-4;P62633-6	P62633-2;P62633;P62633-7;P62633-3;P62633-8;P62633-5;P62633-4;P62633-6	Cellular nucleic acid-binding protein	CNBP
0.206393	0.276794	0.263155	0.191815	0.128821	0.0840642			71	35	0	70.7	35.2	0	118.1	323.31	62156000000	27635000000	34521000000	1.69136	0.148781	0.419892	0.0349003	Q6WCQ1-2;Q6WCQ1-3;J3KSW8;J3KSK7;A8MZF8;K7EJ14;F6WMF4;F6WYE2;F6TR96;H0Y5J9;Q9H2D6-6;Q9H2D6-5;Q9H2D6-7;Q9H2D6-3;Q9H2D6-2;Q9H2D6	Q6WCQ1-2;Q6WCQ1-3;J3KSW8	Myosin phosphatase Rho-interacting protein	MPRIP
0.302524	0.236584	0.204767	-0.209345	-0.337211	-0.0526256			8	8	8	42.1	42.1	42.1	21.728	41.731	19078000000	8571700000	10506000000	1.44572	0.147958	1.16873	-0.299727	J3QQ67;Q07020;G3V203;H0YHA7;Q07020-2;F8VYV2;F8VUA6;A0A075B7A0;F8VXR6	J3QQ67;Q07020;G3V203;H0YHA7;Q07020-2;F8VYV2;F8VUA6;A0A075B7A0	60S ribosomal protein L18	RPL18
0.195977	0.287118	0.256045	-0.387619	-0.389678	-0.349989		+	20	20	20	46.1	46.1	46.1	47.697	221.74	32602000000	15356000000	17247000000	1.49743	0.14638	3.13407	-0.475762	P36578;H3BM89;H3BTP7;H3BU31	P36578;H3BM89;H3BTP7	60S ribosomal protein L4	RPL4
0.358509	0.228234	0.151079	-0.261742	-0.0729683	-0.357807			30	29	28	60.7	59	59	54.231	323.31	112460000000	58997000000	53459000000	0.8619	0.145941	1.23355	-0.330839	Q15233;Q15233-2;H7C367;C9JYS8;C9IZL7;C9J4X2	Q15233;Q15233-2;H7C367;C9JYS8	Non-POU domain-containing octamer-binding protein	NONO
0.117163	0.291368	0.327112	0.131985	0.15549	-0.0513692			32	32	32	57.7	57.7	57.7	75.356	323.31	86094000000	42349000000	43744000000	0.81104	0.145214	0.110385	-0.0212981	Q8IVT2	Q8IVT2	Mitotic interactor and substrate of PLK1	MISP
0.2444	0.0612924	0.425459	0.15043	-0.0187172	-0.0395179			7	7	7	13.1	13.1	13.1	109.13	40.974	1342000000	683620000	658370000	0.515737	0.143717	0.433487	-0.0692685	H7BYN4;Q02241-2;Q02241;Q02241-3;H0YKQ5;H0YMJ4;H0YME6	H7BYN4;Q02241-2;Q02241;Q02241-3	Kinesin-like protein;Kinesin-like protein KIF23	KIF23
0.211386	0.297837	0.217479	0.152897	0.170438	0.160404			89	89	25	61	61	16.9	203.37	323.31	130230000000	57766000000	72466000000	1.44029	0.142234	2.16671	0.0612463	H0Y2S9;H7C3G6;J3QRL2;K7EL39;J3QL44	H0Y2S9		MPRIP
0.249142	0.338339	0.134747	0.246226	0.24306	0.218347		+	68	68	1	66.6	66.6	2	109.08	323.31	130890000000	56911000000	73983000000	0.855402	0.140742	2.37881	0.135878	Q9P0K7-3;Q9P0K7;Q9P0K7-2	Q9P0K7-3;Q9P0K7;Q9P0K7-2	Ankycorbin	RAI14
NaN	0.17031	0.311154	-2.25539	NaN	0.0479571			7	7	7	52.5	52.5	52.5	19.208	76.352	341200000	207350000	133850000	0.529632	0.140732	0.313421	-1.20372	O43447;O43447-2;C9JQD4;H0YEL5	O43447;O43447-2;C9JQD4;H0YEL5	Peptidyl-prolyl cis-trans isomerase H;Peptidyl-prolyl cis-trans isomerase	PPIH
0.262794	0.325617	0.133037	0.430071	0.776441	0.809085			10	10	10	16.9	16.9	16.9	85.763	48.581	1528100000	600940000	927160000	0.881003	0.140483	1.37527	0.571866	Q9Y2J4;Q9Y2J4-2;Q9Y2J4-4;Q9Y2J4-3;D6RCL7;D6RIC7;D6RBK2;D6RJA4;D6RF61;D6RFG0	Q9Y2J4;Q9Y2J4-2;Q9Y2J4-4;Q9Y2J4-3	Angiomotin-like protein 2	AMOTL2
0.178237	0.321928	0.214747	NaN	-0.0585781	NaN			6	6	6	10.9	10.9	10.9	84.071	25.996	317570000	128500000	189070000	1.0706	0.138304	0	-0.158578	F5GZP6;Q86W92-3;Q86W92-4;Q86W92-2;Q86W92;H0YFE4;A0A0A0MTP2;E9PP16;Q8ND30-3;Q8ND30-2;Q8ND30	F5GZP6;Q86W92-3;Q86W92-4;Q86W92-2;Q86W92	Liprin-beta-1	PPFIBP1
0.167872	0.480369	0.0657101	-0.0412835	-0.122617	0.171207			13	11	11	16.6	15	15	123.34	114.73	6939000000	3638500000	3300500000	0.415817	0.137983	0.418786	-0.0975645	Q9ULJ8;Q9ULJ8-4;Q9ULJ8-5;Q9ULJ8-3	Q9ULJ8;Q9ULJ8-4;Q9ULJ8-5;Q9ULJ8-3	Neurabin-1	PPP1R9A
0.15017	0.190046	0.369048	-0.678395	NaN	-0.197385			8	8	8	11.2	11.2	11.2	121.89	23.242	441380000	204840000	236540000	0.744992	0.136421	0.572393	-0.53789	P54289-4;P54289-5;P54289;P54289-3;P54289-2;E7ERK3;H0Y715	P54289-4;P54289-5;P54289;P54289-3;P54289-2	Voltage-dependent calcium channel subunit alpha-2/delta-1;Voltage-dependent calcium channel subunit alpha-2-1;Voltage-dependent calcium channel subunit delta-1	CACNA2D1
0.229588	0.153416	0.325617	NaN	0.157432	-0.2188			7	7	7	52.9	52.9	52.9	8.2178	18.39	994430000	467220000	527210000	0.951582	0.136207	0.212207	-0.130684	P63173;J3KT73;J3QL01;J3KSP2	P63173;J3KT73;J3QL01	60S ribosomal protein L38	RPL38
0.252416	0.250234	0.20364	-0.0828356	-0.0147182	-0.121722			2	2	2	2.6	2.6	2.6	98.935	3.0325	1734000000	842430000	891600000	1.8691	0.13543	1.50692	-0.173092	Q86VV8-4;Q86VV8-3;Q86VV8;J3KTD2;J3KT00;Q86VV8-2	Q86VV8-4;Q86VV8-3;Q86VV8;J3KTD2;J3KT00;Q86VV8-2	Rotatin	RTTN
0.35682	0.135009	0.212507	0.216858	-0.0235337	-0.321351			5	5	5	14.4	14.4	14.4	66.595	32.468	793460000	387720000	405740000	0.759888	0.134779	0.340916	-0.142675	O43663-2;O43663-4;O43663;O43663-3;H0YL53;H0YLA0;H0YM42	O43663-2;O43663-4;O43663;O43663-3	Protein regulator of cytokinesis 1	PRC1
NaN	0.301236	0.164271	NaN	NaN	NaN			2	2	2	5.1	5.1	5.1	56.399	10.77	51577000	21653000	29923000	0.51828	0.132754	0	NaN	A0A087X1B2;B9A018;Q53GS9-2;Q53GS9;Q53GS9-3	A0A087X1B2;B9A018;Q53GS9-2;Q53GS9;Q53GS9-3	U4/U6.U5 tri-snRNP-associated protein 2	USP39
0.280362	0.116764	0.301002	0.174534	-0.0667295	-0.199852			5	5	5	11.5	11.5	11.5	47.26	8.2451	510930000	276070000	234860000	0.822485	0.13271	0.449404	-0.130682	Q9GZS1-2;Q9GZS1;E7EX70	Q9GZS1-2;Q9GZS1	DNA-directed RNA polymerase I subunit RPA49	POLR1E
0.192447	0.307079	0.188274	NaN	-0.226679	0.0728604			4	4	4	43.2	43.2	43.2	8.85	20.232	689460000	301400000	388070000	1.09718	0.129267	0.349467	-0.176909	Q8WVC2;P63220;Q9BYK1;Q9BYK2	Q8WVC2;P63220;Q9BYK1	40S ribosomal protein S21	RPS21
0.281787	0.298893	0.104202	NaN	NaN	0.857583			3	3	3	7.8	7.8	7.8	46.8	6.3809	160100000	69176000	90922000	0.755916	0.128294	0	0.757583	Q4G148-2;Q4G148	Q4G148-2;Q4G148	Glucoside xylosyltransferase 1	GXYLT1
1.06736	0.174023	-0.5606	1.73613	2.32783	2.00623			12	12	0	37.3	37.3	0	48.099	86.322	749340000	210330000	539010000	0.0900722	0.126929	2.10713	1.9234	B4DLN1;I3L1E8;F6QW41	B4DLN1
0.226262	NaN	NaN	-0.127148	NaN	-0.207794			1	1	1	14.9	14.9	14.9	11.502	7.9467	181350000	88017000	93329000	0	0.126262	1.0211	-0.267471	H0Y6D8;Q32MN6;P20226-2;P20226	H0Y6D8;Q32MN6;P20226-2;P20226	TATA-box-binding protein	TBP
0.136848	0.278104	0.248049	0.0268709	0.100843	-0.614138			5	5	5	5.5	5.5	5.5	102.69	10.567	672340000	244620000	427710000	0.973335	0.121	0.434722	-0.262141	P49916-3;P49916;P49916-4;P49916-2;K7EQB6;K7ERZ5;K7ENR9	P49916-3;P49916;P49916-4;P49916-2;K7EQB6;K7ERZ5	DNA ligase 3	LIG3
-0.00977119	0.131326	0.540325	NaN	NaN	NaN			4	4	4	6.7	6.7	6.7	96.827	11.067	119240000	48040000	71197000	0.267051	0.120627	0	NaN	C9JJX6;E9PDC3;O00192-2;O00192	C9JJX6;E9PDC3;O00192-2;O00192	Armadillo repeat protein deleted in velo-cardio-facial syndrome	ARVCF
0.172103	0.398241	0.0829751	-0.132847	-0.114769	0.0870554			13	13	13	44.9	44.9	44.9	40.556	81.627	2226300000	1035500000	1190800000	0.473402	0.117773	0.792432	-0.15352	P40938;P40938-2;A0A087X270	P40938;P40938-2	Replication factor C subunit 3	RFC3
0.233765	0.201508	NaN	NaN	NaN	NaN			4	4	4	47.7	47.7	47.7	10.116	58.679	311980000	279900000	32076000	1.06177	0.117637	0	NaN	Q9H3K6;A0A087WZT3;Q9H3K6-2;H3BV85;H3BTW0;A0A0B4J295;H3BVE0	Q9H3K6;A0A087WZT3;Q9H3K6-2;H3BV85;H3BTW0;A0A0B4J295;H3BVE0	BolA-like protein 2	BOLA2;BOLA2B
0.153287	0.19862	0.297954	0.774249	0.645333	0.834064			9	9	9	28	28	28	37.567	22.507	2041500000	1402100000	639320000	0.950474	0.11662	2.14069	0.651215	P48729-3;P48729;P48729-2;D6REM4;E7ETM0;Q8N752;U3KPX3;H0Y9X2;U3KQK7;E5RG27;D6RGE5;U3KQ83	P48729-3;P48729;P48729-2;D6REM4;E7ETM0;Q8N752	Casein kinase I isoform alpha;Casein kinase I isoform alpha-like	CSNK1A1;CSNK1A1L
0.177854	0.267116	0.190552	-0.293624	-0.156949	-0.286867			11	11	11	46.3	46.3	46.3	36.112	115.4	4083000000	2352800000	1730200000	1.24496	0.111841	1.79206	-0.345813	P05198;H0YJS4;G3V4T5	P05198;H0YJS4;G3V4T5	Eukaryotic translation initiation factor 2 subunit 1	EIF2S1
0.226139	0.238909	0.166073	-0.339637	-0.249376	-0.33692		+	42	42	42	66.3	66.3	66.3	82.704	323.31	79651000000	33664000000	45987000000	1.40909	0.110373	2.28222	-0.408644	P13010;C9JZ81;H7C0H9	P13010	X-ray repair cross-complementing protein 5	XRCC5
0.323312	0.265917	0.0411028	NaN	NaN	0.65828			3	3	3	4.7	4.7	4.7	91.099	6.8315	236730000	108010000	128720000	0.482367	0.110111	0	0.55828	A0A087WVR3;A0A087WTW0;Q96T88;Q96T88-2;A0A087WWG9	A0A087WVR3;A0A087WTW0;Q96T88;Q96T88-2;A0A087WWG9	E3 ubiquitin-protein ligase UHRF1	UHRF1
0.239642	0.168514	0.220825	0.095722	0.0832474	0.0659859			68	68	63	39.9	39.9	37.7	212.27	323.31	30919000000	13884000000	17035000000	1.44794	0.10966	0.776997	-0.0183483	Q9Y4I1-2;Q9Y4I1;A0A087WY00;G3V394;F8W6H6;Q9Y4I1-3;F8WE88;E7ERV5;O95317;Q9UES5;Q9NQX4;H0YMK3;Q9NQX4-2;G3V3C9;H0YM93;H0YM96	Q9Y4I1-2;Q9Y4I1;A0A087WY00;G3V394;F8W6H6;Q9Y4I1-3;F8WE88	Unconventional myosin-Va	MYO5A
0.298072	0.081885	0.248778	1.66903	1.59741	1.57986		+	23	23	23	22.3	22.3	22.3	156.27	108.66	3203700000	1054700000	2149000000	0.627298	0.109578	3.48983	1.51543	Q86UP2;Q86UP2-2;Q86UP2-4;Q86UP2-3;G3V4Y7;H0YJZ8;G3V5G2;B7Z6P3;H0YJP2;G3V5P0;H0YJV5	Q86UP2;Q86UP2-2;Q86UP2-4;Q86UP2-3;G3V4Y7	Kinectin	KTN1
0.243425	0.357045	0.0231843	-0.693155	-0.463012	-0.77972			7	7	7	24.1	24.1	24.1	43.476	106.27	6040800000	3586400000	2454300000	0.413699	0.107885	1.80407	-0.745295	Q6NZI2;Q6NZI2-2;Q6NZI2-3	Q6NZI2;Q6NZI2-2	Polymerase I and transcript release factor	PTRF
0.207018	NaN	NaN	NaN	NaN	NaN			2	2	2	4.1	4.1	4.1	93.231	3.7997	32282000	13381000	18901000	0	0.107018	0	NaN	Q9Y2X9-2;Q9Y2X9	Q9Y2X9-2;Q9Y2X9	Zinc finger protein 281	ZNF281
0.15782	0.179511	0.272023	1.01927	1.09153	0.891264		+	13	13	12	45.2	45.2	39	40.949	96.761	11429000000	4205300000	7223600000	1.00629	0.103118	2.37678	0.90069	O15143;C9J4Z7;F8VXW2;C9JEY1;C9JQM8;C9JFG9;C9J6C8;C9JBJ7;C9K057;C9JTT6;C9JM51;F8WEB3	O15143	Actin-related protein 2/3 complex subunit 1B	ARPC1B
0.196355	0.241474	0.170694	-0.348739	-0.208178	-0.307894			14	14	14	40.3	40.3	40.3	32.728	76.235	14144000000	6386600000	7757600000	1.41832	0.102841	1.94449	-0.38827	Q02878;F8VZ45;U3KQR5;F8VR69;F8VZA3;F8VWR1;F8VU16	Q02878	60S ribosomal protein L6	RPL6
0.208642	0.141694	0.256648	-0.142178	-0.240844	-0.193965			11	11	11	53.9	53.9	53.9	18.079	45.728	12434000000	5712900000	6721200000	1.0374	0.102328	2.02837	-0.292329	M0R117;Q02543;M0R3D6;M0R1A7;M0R0P7	M0R117;Q02543;M0R3D6;M0R1A7;M0R0P7	60S ribosomal protein L18a	RPL18A
0.201759	NaN	NaN	NaN	NaN	-0.0900656			2	2	2	17.1	17.1	17.1	24.591	21.773	122420000	63864000	58552000	0	0.101759	0	-0.190066	Q8TBF4;F8VXY6;G3V1V1	Q8TBF4;F8VXY6;G3V1V1	Zinc finger CCHC-type and RNA-binding motif-containing protein 1	ZCRB1
0.348686	0.131326	0.117296	0.126709	0.240864	0.237931			13	13	13	49.4	49.4	49.4	38.496	87.098	2963700000	1441100000	1522600000	0.499208	0.0991026	0.945268	0.101834	P40937;P40937-2;F5H5S0;E9PEP3;C9JH72;F5H304;F5H0U6	P40937;P40937-2	Replication factor C subunit 5	RFC5
0.221939	0.133037	0.235972	0.656908	0.932968	0.538538			19	17	17	15.4	14.3	14.3	179.48	112.12	954140000	371900000	582240000	1.02245	0.0969829	1.45778	0.609472	F2Z2E2;Q86VI3;E9PDT6	F2Z2E2;Q86VI3	Ras GTPase-activating-like protein IQGAP3	IQGAP3
0.254957	0.138159	0.195474	NaN	-0.129765	0.118493			6	6	6	15.3	15.3	15.3	41.676	8.7513	189350000	93029000	96318000	0.982803	0.0961965	0.258747	-0.105636	Q96QE5;J3KTG7;Q96QE5-4	Q96QE5	Transcription elongation factor, mitochondrial	TEFM
0.219711	0.177599	0.188274	0.040121	0.0977456	-0.146116			16	16	16	53.2	53.2	53.2	29.464	323.31	138000000000	72226000000	65771000000	1.76507	0.0951946	0.526633	-0.10275	P06748-2;P06748;P06748-3;E5RI98;E5RGW4	P06748-2;P06748;P06748-3	Nucleophosmin	NPM1
0.0740944	0.0997664	0.409038	NaN	NaN	-0.147969			4	4	4	17.2	17.2	17.2	17.631	5.6023	83790000	37050000	46740000	0.324835	0.0942996	0	-0.247969	Q8N5L8	Q8N5L8	Ribonuclease P protein subunit p25-like protein	RPP25L
0.284751	0.0969364	0.193583	0.139862	NaN	-1.33359			3	3	3	8	8	8	63.132	20.635	232450000	119750000	112700000	0.633218	0.0917566	0.285924	-0.696863	Q9NY61	Q9NY61	Protein AATF	AATF
0.172359	0.432959	-0.0334957	NaN	NaN	NaN			6	6	5	6	6	5.2	155.29	16.277	219500000	70449000	149050000	0.243249	0.0906077	0	NaN	A0A087WYN9;Q7Z478	A0A087WYN9;Q7Z478	ATP-dependent RNA helicase DHX29	DHX29
0.218843	0.0302654	0.322274	-0.120953	0.169284	NaN			6	6	6	15.4	15.4	15.4	64.804	20.399	462390000	209900000	252480000	0.396991	0.090461	0.15899	-0.0758347	Q9UGN5-2;Q9UGN5;G3V167;H0YH02	Q9UGN5-2;Q9UGN5;G3V167	Poly [ADP-ribose] polymerase 2	PARP2
0.124328	0.0169242	0.42707	2.1897	2.27671	2.1113		+	12	12	12	54.3	54.3	54.3	31.703	98.659	4472800000	1297400000	3175400000	0.265906	0.0894407	3.28338	2.09257	J3QT28;O43684-2;O43684;J3QSX4	J3QT28;O43684-2;O43684;J3QSX4	Mitotic checkpoint protein BUB3	BUB3
0.1644	0.196355	0.206643	-0.0339387	0.0356239	-0.247183			6	6	6	56.8	56.8	56.8	11.168	25.799	9522000000	4368900000	5153100000	1.70426	0.0891329	0.779773	-0.181833	K7ERI7;P35268;K7EMH1;K7EP65;K7EKS7;K7ELC4;K7EJT5	K7ERI7;P35268;K7EMH1;K7EP65;K7EKS7;K7ELC4;K7EJT5	60S ribosomal protein L22	RPL22
0.151339	0.224781	NaN	NaN	NaN	NaN			2	2	2	9.8	9.8	9.8	28.228	7.381	153460000	70597000	82864000	0.599442	0.0880602	0	NaN	Q9UIV1-2;Q9UIV1;H0YBT3;H0YAV9	Q9UIV1-2;Q9UIV1;H0YBT3;H0YAV9	CCR4-NOT transcription complex subunit 7	CNOT7
0.357383	0.214249	-0.0112099	-0.258822	-0.137965	0.0531114			9	9	9	28.1	28.1	28.1	47.355	66.383	2734100000	1307600000	1426600000	0.298092	0.0868075	0.847874	-0.214559	O75955;O75955-2;A2AB13;A0A0G2JJQ6;A2AB12;A2AB10;A2AB11;A2AB09	O75955;O75955-2;A2AB13;A0A0G2JJQ6;A2AB12;A2AB10;A2AB11;A2AB09	Flotillin-1	FLOT1
0.125519	0.229957	0.202512	NaN	NaN	NaN			6	6	6	10.9	10.9	10.9	82.175	16.457	230310000	85876000	144440000	0.956122	0.0859958	0	NaN	Q14684-2;Q14684	Q14684-2;Q14684	Ribosomal RNA processing protein 1 homolog B	RRP1B
0.185993	NaN	NaN	NaN	NaN	NaN			2	2	2	3.3	3.3	3.3	66.013	4.015	92534000	33336000	59197000	0	0.0859933	0	NaN	F5H8D7;P18887;M0QZ96;M0R0D2;M0R1U8;M0QYS5	F5H8D7;P18887;M0QZ96;M0R0D2;M0R1U8;M0QYS5	DNA repair protein XRCC1	XRCC1
0.104068	0.196103	0.254352	NaN	NaN	NaN			16	6	6	23.4	11.2	11.2	103.96	68.86	245730000	109410000	136320000	0.716671	0.0848413	0	NaN	O94973;O94973-2;A0A0G2JS82;O94973-3;A0A0G2JQM1	O94973;O94973-2;A0A0G2JS82;O94973-3;A0A0G2JQM1	AP-2 complex subunit alpha-2	AP2A2
0.233029	0.18612	0.133958	0.260628	0.239642	-0.0126646			7	7	7	35.7	35.7	35.7	28.235	57.834	3420400000	1049800000	2370600000	1.00727	0.0843691	0.259457	0.0625352	Q5RKV6	Q5RKV6	Exosome complex component MTR3	EXOSC6
0.184344	NaN	NaN	NaN	NaN	0.650305			2	2	2	13.4	13.4	13.4	24.752	7.5284	64306000	29017000	35289000	0	0.0843437	0	0.550305	Q86UY6-3;Q86UY6;F5H2C9;Q86UY6-4	Q86UY6-3;Q86UY6;F5H2C9;Q86UY6-4	N-alpha-acetyltransferase 40	NAA40
0.26135	0.213627	0.0768327	1.03886	0.442121	0.0448837			5	5	5	7.6	7.6	7.6	103.83	43.543	1128000000	317350000	810610000	0.571328	0.0839368	0.533441	0.408621	Q14596-2;Q14596;B7Z5R6	Q14596-2;Q14596;B7Z5R6	Next to BRCA1 gene 1 protein	NBR1
0.219587	0.204266	0.127237	-0.238868	-0.264911	-0.0451337			13	13	13	66.7	66.7	66.7	29.505	208.46	10189000000	5329400000	4860000000	1.00232	0.0836966	1.25878	-0.282971	C9J9K3;A0A0C4DG17;P08865;F8WD59	C9J9K3;A0A0C4DG17;P08865;F8WD59	40S ribosomal protein SA	RPSA
0.216362	0.142087	0.179893	-0.218598	-0.152564	-0.143723			21	21	21	60.1	60.1	60.1	29.225	107.94	44783000000	21735000000	23049000000	1.18216	0.0794472	2.12617	-0.271629	P18124;A8MUD9;C9JIJ5;C9JZ88	P18124;A8MUD9	60S ribosomal protein L7	RPL7
0.176195	-0.0258379	0.387583	NaN	0.279055	0.194213			7	7	7	12.2	12.2	12.2	80.702	30.416	885000000	399530000	485460000	0.240541	0.0793134	0.717501	0.136634	Q13724-2;Q13724;C9J8D4;C9JDQ1	Q13724-2;Q13724;C9J8D4	Mannosyl-oligosaccharide glucosidase	MOGS
0.192699	0.10165	0.240497	0.703366	0.694746	0.718351		+	25	25	24	84	84	80.2	26.688	166.81	110800000000	49304000000	61494000000	0.711054	0.0782822	3.8871	0.605488	P23396;P23396-2;E9PL09;E9PPU1;F2Z2S8;H0YCJ7;H0YEU2;H0YF32;E9PQ96;E9PJH4;E9PK82;E9PSF4;E9PQX2;H0YES8	P23396;P23396-2;E9PL09;E9PPU1;F2Z2S8;H0YCJ7;H0YEU2	40S ribosomal protein S3	RPS3
0.173255	0.118626	0.242816	-0.314966	-0.467713	-0.323317			10	10	9	95.7	95.7	80.9	11.665	141.38	7437900000	3634100000	3803700000	0.792051	0.0782323	1.95829	-0.468665	P05387;H0YDD8;P05386-2	P05387;H0YDD8	60S acidic ribosomal protein P2	RPLP2
0.177854	NaN	NaN	NaN	NaN	NaN			3	3	3	20.7	20.7	20.7	28.993	6.1614	109700000	51778000	57924000	0	0.077854	0	NaN	P30040;F8VY02;P30040-2	P30040	Endoplasmic reticulum resident protein 29	ERP29
0.224658	0.0688772	0.237197	0.871292	NaN	0.916171			5	5	5	42.8	42.8	42.8	15.947	28.489	264560000	116000000	148560000	0.535672	0.0769105	1.7449	0.793731	Q6P1L8	Q6P1L8	39S ribosomal protein L14, mitochondrial	MRPL14
0.0919367	0.551295	-0.11591	-0.0253972	0.217975	0.0180643			11	11	11	26.6	26.6	26.6	63.523	63.17	3316900000	1457000000	1859900000	0.132123	0.0757737	0.137018	-0.0297859	O95470;H0Y3V8;H7BXL7	O95470	Sphingosine-1-phosphate lyase 1	SGPL1
NaN	0.173767	NaN	NaN	NaN	NaN			6	6	6	13.4	13.4	13.4	102	74.379	172760000	95099000	77664000	0	0.0737671	0	NaN	Q7KZF4;H7C597	Q7KZF4;H7C597	Staphylococcal nuclease domain-containing protein 1	SND1
0.171591	NaN	NaN	NaN	NaN	NaN			2	2	2	32.4	32.4	32.4	11.845	11.74	81592000	37917000	43675000	0	0.0715911	0	NaN	P62310	P62310	U6 snRNA-associated Sm-like protein LSm3	LSM3
0.170438	NaN	NaN	1.08542	NaN	0.645978			2	2	2	9.9	9.9	9.9	31.972	8.8921	119900000	50873000	69029000	0	0.0704378	0.749819	0.765701	F8W733;Q9NXR7-4;Q9NXR7-3;Q9NXR7;Q9NXR7-1;C9J2G0	F8W733;Q9NXR7-4;Q9NXR7-3;Q9NXR7;Q9NXR7-1;C9J2G0	BRCA1-A complex subunit BRE	BRE
0.363676	-0.0484122	0.19131	NaN	0.242938	NaN			4	4	4	24.7	24.7	24.7	29.736	38.491	713260000	309060000	404190000	0.205763	0.0688579	0	0.142938	C9JHG2;Q14699;C9JWQ9;F8WAR1;C9JRN3;G3XAJ6	C9JHG2;Q14699;C9JWQ9;F8WAR1;C9JRN3;G3XAJ6	Raftlin	RFTN1
0.23842	0.222557	0.0447438	NaN	-0.830947	-0.374318			5	5	5	41	41	41	19.76	13.475	713090000	398740000	314350000	0.41514	0.0685737	0.698943	-0.702633	Q9Y5S9-2;Q9Y5S9;A0A0J9YW13	Q9Y5S9-2;Q9Y5S9;A0A0J9YW13	RNA-binding protein 8A	RBM8A
0.14978	0.170694	0.183201	-0.199802	-0.150513	-0.226054		+	11	11	11	69.1	69.1	69.1	17.818	124.8	27927000000	14048000000	13879000000	1.69889	0.0678915	2.24441	-0.292123	P30050;P30050-2	P30050;P30050-2	60S ribosomal protein L12	RPL12
0.100574	0.228973	0.172487	-0.161815	-0.0968229	-0.145526			14	14	14	49.8	49.8	49.8	28.024	203.41	29521000000	14632000000	14889000000	0.674512	0.0673447	2.16445	-0.234721	P62917;E9PKZ0;E9PKU4;G3V1A1;E9PP36	P62917;E9PKZ0;E9PKU4;G3V1A1	60S ribosomal protein L8	RPL8
0.166715	NaN	NaN	NaN	NaN	NaN			4	4	4	14.2	14.2	14.2	44.648	5.8969	216680000	31140000	185540000	0	0.0667154	0	NaN	J3QRD1;P51648;P51648-2;J3QKK9;J3KTD9;I3L2W1;K7EN73;J3KTG1;C9JGJ2;I3L0X1	J3QRD1;P51648;P51648-2	Fatty aldehyde dehydrogenase	ALDH3A2
0.22848	0.106616	0.163499	NaN	NaN	0.169668			3	3	3	20.9	20.9	20.9	24.49	7.4564	55545000	23840000	31704000	0.697229	0.0661984	0	0.0696685	Q9NQ50	Q9NQ50	39S ribosomal protein L40, mitochondrial	MRPL40
0.0483758	0.283211	NaN	-0.770461	0.115832	-0.151923			3	3	3	26.4	26.4	26.4	14.585	7.4483	126220000	68637000	57582000	0.170793	0.0657932	0.530034	-0.368851	Q9Y3B4	Q9Y3B4	Splicing factor 3B subunit 6	SF3B6
0.161178	NaN	NaN	NaN	NaN	NaN			2	2	2	15.3	15.3	15.3	14.536	2.3781	30341000	12414000	17927000	0	0.0611782	0	NaN	Q9H840	Q9H840	Gem-associated protein 7	GEMIN7
0.177599	0.331247	-0.0267929	-0.359435	-0.158091	-0.823958			38	38	37	50.8	50.8	49.6	76.149	323.31	242330000000	125780000000	116550000000	0.209253	0.0606843	0.96251	-0.547161	P23246;P23246-2;H0Y9K7;H0Y9U2	P23246;P23246-2	Splicing factor, proline- and glutamine-rich	SFPQ
0.459432	0.143916	-0.121439	1.37167	0.777956	0.199751			6	6	6	13	13	13	57.116	16.778	861800000	379500000	482300000	0.123458	0.060636	0.742526	0.683126	P07237;H7BZ94;I3L398;I3L312;H0Y3Z3;I3L4M2;I3NI03;I3L3U6;I3L3P5	P07237;H7BZ94;I3L398;I3L312;H0Y3Z3	Protein disulfide-isomerase	P4HB
0.197991	0.201885	0.081067	0.275484	0.316146	0.32008		+	61	61	2	58	58	1.6	128.48	323.31	250990000000	103840000000	147150000000	0.572634	0.0603143	2.31408	0.203903	E9PDF6;O43795;E7EQD9;H7C2Y7;C9JYW1;C9JUP5;A0A0U1RRI3	E9PDF6;O43795	Unconventional myosin-Ib	MYO1B
0.151209	0.0886844	0.238053	-0.753799	-0.485358	-0.544477			9	9	9	20.9	20.9	20.9	62.094	35.925	2084600000	1093100000	991550000	0.516673	0.0593156	1.87062	-0.694544	P19525;P19525-2;F8WBH4;C9JZT2	P19525;P19525-2	Interferon-induced, double-stranded RNA-activated protein kinase	EIF2AK2
0.178109	0.180657	0.119157	-0.0715273	-0.159557	-0.124			8	8	8	47.1	47.1	47.1	15.798	39.146	8258500000	3940100000	4318400000	1.00818	0.0593077	1.87178	-0.218361	P61353;K7ELC7;K7EQQ9;K7ERY7	P61353;K7ELC7;K7EQQ9	60S ribosomal protein L27	RPL27
0.109962	0.167615	0.193204	0.977316	0.899717	0.870976		+	7	7	7	21.6	21.6	21.6	49.611	33.526	907880000	357730000	550160000	0.833028	0.0569271	2.82062	0.816003	Q96EY1-2;Q96EY1;Q96EY1-3;I3L1T6	Q96EY1-2;Q96EY1;Q96EY1-3	DnaJ homolog subfamily A member 3, mitochondrial	DNAJA3
NaN	0.156785	NaN	NaN	NaN	NaN			2	2	2	1.2	1.2	1.2	220.62	3.5953	76873000	31247000	45626000	0	0.0567849	0	NaN	Q14966;A0A096LNS4;A0A096LPK8;A0A096LPH6;Q14966-2;Q14966-5;Q14966-4;Q14966-3	Q14966;A0A096LNS4;A0A096LPK8;A0A096LPH6;Q14966-2;Q14966-5;Q14966-4;Q14966-3	Zinc finger protein 638	ZNF638
0.262553	0.0368901	0.167486	-1.1977	-1.12011	0.32964			23	20	20	38.4	34.1	34.1	81.744	95.094	3307300000	1618200000	1689100000	0.314657	0.0556433	0.577716	-0.762722	P14923;C9JTX4;C9J826;C9JK18;C9JKY1;C9JPI2;K7ERP3	P14923	Junction plakoglobin	JUP
0.167872	0.153546	0.140517	-0.234109	-0.266212	-0.192579		+	8	8	8	36	36	36	24.261	51.699	25044000000	12318000000	12726000000	1.68292	0.0539782	2.38493	-0.330967	P26373;J3QSB4;P26373-2;H3BUK8;H3BTH3;J3KS98	P26373;J3QSB4;P26373-2	60S ribosomal protein L13	RPL13
-0.00128459	0.24184	0.210888	1.89119	1.5773	1.61273		+	10	10	10	49.1	49.1	49.1	30.315	102.86	3652100000	1159500000	2492600000	0.239023	0.0504811	2.41387	1.59374	A0A0A0MRJ6;H7BY58;P22061;P22061-2;F6S8N6;C9J0F2;F8WDT3;F8WAV5;F8WAX2;H7C4X2	A0A0A0MRJ6;H7BY58;P22061;P22061-2;F6S8N6	Protein-L-isoaspartate O-methyltransferase;Protein-L-isoaspartate(D-aspartate) O-methyltransferase	PCMT1
0.138421	0.10608	0.206518	-0.150705	-0.152468	-0.188496		+	8	8	8	38.5	38.5	38.5	13.293	20.088	5921200000	2832300000	3088800000	0.636183	0.05034	2.66349	-0.26389	P49207	P49207	60S ribosomal protein L34	RPL34
0.26135	-0.00414652	0.191815	-0.368942	-0.378663	-0.0852059			10	10	10	46.6	46.6	46.6	24.146	40.25	13330000000	6680500000	6649700000	0.22489	0.049673	1.22735	-0.377604	P61313;E7EQV9;E7ENU7;E7EX53;P61313-2;E7ERA2	P61313;E7EQV9;E7ENU7;E7EX53	60S ribosomal protein L15;Ribosomal protein L15	RPL15
0.444879	-0.0428431	0.0455827	NaN	NaN	NaN			6	6	6	7.9	7.9	7.9	124.82	54.932	731910000	322530000	409380000	0.111218	0.0492062	0	NaN	G8JLD3;X6RLX0;Q8IUD2-2;Q8IUD2-3;Q8IUD2;X6RM00;Q8IUD2-4;Q8IUD2-5;K7EPD6;A0A0U1RQN0;K7EPP6;A0A0U1RQM4;H7C4G9;O15083	G8JLD3;X6RLX0;Q8IUD2-2;Q8IUD2-3;Q8IUD2;X6RM00;Q8IUD2-4;Q8IUD2-5	ELKS/Rab6-interacting/CAST family member 1	ERC1
0.1125	0.0549179	0.280125	0.0871912	-0.0595551	-0.24185			3	3	3	30.2	30.2	30.2	6.1152	5.4725	1860600000	890680000	969960000	0.265784	0.0491809	0.670611	-0.171405	A0A087WTT6;P62273;P62273-2	A0A087WTT6;P62273;P62273-2	40S ribosomal protein S29	RPS29
0.487692	-0.144074	0.0969364	0.0200577	0.120485	0.375846			4	4	4	11.5	11.5	11.5	60.54	34.573	363400000	166990000	196410000	0.0846686	0.0468515	0.247109	0.0721294	Q9BVP2-2;Q9BVP2	Q9BVP2-2;Q9BVP2	Guanine nucleotide-binding protein-like 3	GNL3
0.14496	NaN	NaN	NaN	NaN	NaN			2	2	2	5.1	5.1	5.1	41.401	4.4062	52203000	26531000	25672000	0	0.04496	0	NaN	Q8TDN6	Q8TDN6	Ribosome biogenesis protein BRX1 homolog	BRIX1
0.215989	0.136191	0.081885	-0.728885	-0.655331	-0.94561			18	18	18	19	19	19	159.69	124.49	2470000000	1138800000	1331200000	0.431884	0.0446885	2.01168	-0.876609	Q6YHK3-4;Q6YHK3;Q6YHK3-2;Q6YHK3-3	Q6YHK3-4;Q6YHK3;Q6YHK3-2;Q6YHK3-3	CD109 antigen	CD109
0.194087	0.106616	0.127765	-0.291786	-0.223424	NaN			2	2	2	0.9	0.9	0.9	480.19	2.645	4127700000	2066600000	2061100000	0.609733	0.0428229	1.21706	-0.357605	Q7Z6Z7-2;Q7Z6Z7-3;Q7Z6Z7	Q7Z6Z7-2;Q7Z6Z7-3;Q7Z6Z7	E3 ubiquitin-protein ligase HUWE1	HUWE1
0.267236	0.0405417	0.120485	2.03319	2.00759	2.2865		+	8	8	4	17.7	17.7	11.8	67.819	44.132	1035500000	267900000	767620000	0.232448	0.0427542	2.70841	2.00909	P26038;V9GZ54	P26038	Moesin	MSN
0.127501	0.15056	0.148088	-0.0656873	0.358059	-0.0221706			5	5	5	45.5	45.5	45.5	12.453	12.13	810920000	382540000	428380000	1.53895	0.0420497	0.0232457	-0.00993311	J3QLW7;Q9Y221-2;Q9Y221;J3QRD6;J3QRR4	J3QLW7;Q9Y221-2;Q9Y221	60S ribosome subunit biogenesis protein NIP7 homolog	NIP7
0.221568	NaN	0.0592169	NaN	2.80717	NaN			5	5	5	9	9	9	102.29	11.226	715540000	119460000	596080000	0.151158	0.0403923	0	2.70717	A0A0A0MRA8;Q9Y2J2-2;Q9Y2J2-4;Q9Y2J2;A8K968;Q9Y2J2-3;B2RB02;J3KT37;J3QRQ6;J3KS70;J3QLU5;J3QKY2;J3KRD1;J3QKK4;J3QR33;J3QS55;A0A0J9YY18;I6L9B1;E9PII3;E9PK52;E9PHY5;O43491-2;O43491-3;O43491-4;O43491	A0A0A0MRA8;Q9Y2J2-2;Q9Y2J2-4;Q9Y2J2;A8K968;Q9Y2J2-3;B2RB02	Band 4.1-like protein 3;Band 4.1-like protein 3, N-terminally processed	EPB41L3
-0.0411945	0.316378	NaN	NaN	NaN	0.2929			4	4	4	24.1	24.1	24.1	18.929	7.1751	582530000	403690000	178850000	0.0614471	0.0375915	0	0.1929	M0QYZ2;M0R0N4;X6R390;P53680-2;P53680;M0R1S0;M0QZ21	M0QYZ2;M0R0N4;X6R390;P53680-2;P53680;M0R1S0;M0QZ21	AP-2 complex subunit sigma	AP2S1
0.062398	0.161694	0.187261	0.0589399	0.322044	0.183455			14	6	0	59.3	31.3	0	37.034	98.468	1930800000	938720000	992090000	0.363995	0.0371177	0.436749	0.088146	Q96PK6-5;A0A0A6YYI9;F8WDX3;A0A0A0MSL8;B8ZZ74;Q96PK6-3;Q96PK6-4	Q96PK6-5;A0A0A6YYI9;F8WDX3;A0A0A0MSL8;B8ZZ74;Q96PK6-3;Q96PK6-4	RNA-binding protein 14	RBM14;RBM14-RBM4
0.177216	0.0640551	0.169027	-0.29635	-0.185835	-0.197765			14	14	2	52.3	52.3	13.6	24.604	147.4	42791000000	21602000000	21189000000	0.377642	0.0367661	1.94695	-0.32665	P27635;X1WI28;A0A087WV22;H7C123;H7C2C5;B8A6G2;A6QRI9;Q96L21;H7C2U2	P27635;X1WI28;A0A087WV22;H7C123;H7C2C5	60S ribosomal protein L10	RPL10
0.124461	0.522056	-0.236979	0.0779266	0.147828	0.143393			3	3	3	7.5	7.5	7.5	77.485	15.999	377810000	168150000	209660000	0.0540275	0.0365123	0.381917	0.0230493	Q9UKF6;G5E9W3	Q9UKF6;G5E9W3	Cleavage and polyadenylation specificity factor subunit 3	CPSF3
0.1995	-0.281229	0.489851	0.0749164	-0.125038	NaN			6	4	3	10.9	7.7	6.5	61.163	23.48	590600000	316070000	274530000	0.0518922	0.0360408	0.367207	-0.125061	A0A087WXZ3;Q9Y5A9;Q9Y5A9-2;S4R3V3;S4R3J8	A0A087WXZ3;Q9Y5A9;Q9Y5A9-2	YTH domain-containing family protein 2	YTHDF2
0.13829	0.00762616	0.255682	-0.282456	-0.172799	-0.253085			6	6	6	47.6	47.6	47.6	14.558	29.187	11602000000	5825000000	5777500000	0.165591	0.0338661	2.02808	-0.336113	E7EPB3;P50914	E7EPB3;P50914	60S ribosomal protein L14	RPL14
0.155231	0.132116	0.114234	0.0710762	0.0928839	-0.0299268			6	6	6	47.9	47.9	47.9	13.373	32.799	25775000000	13042000000	12732000000	0.982903	0.0338604	0.551063	-0.0553222	P60866;P60866-2;E5RJX2;E5RIP1;G3XAN0	P60866;P60866-2;E5RJX2;E5RIP1	40S ribosomal protein S20	RPS20
NaN	0.133695	NaN	NaN	NaN	NaN			3	2	2	3.7	2.9	2.9	97.204	4.1086	282700000	132590000	150110000	0	0.0336951	0	NaN	Q8NDT2;Q8NDT2-2	Q8NDT2;Q8NDT2-2	Putative RNA-binding protein 15B	RBM15B
0.0886844	0.176067	0.132643	0.0540844	-0.15859	-0.332244			9	9	9	45	45	45	27.872	68.496	4782400000	2716800000	2065600000	0.485526	0.0324648	0.798618	-0.245583	P0DN76;Q01081;Q01081-2;Q01081-4;Q8WU68-3;Q8WU68;M0QYK5;M0R2N4;Q01081-3;Q8WU68-2;K7EJH3;K7EJM7	P0DN76;Q01081;Q01081-2;Q01081-4	Splicing factor U2AF 35 kDa subunit	U2AF1
0.113434	0.1129	0.169155	1.05721	0.998845	0.996316		+	17	17	17	71.6	71.6	71.6	35.076	150.92	5334400000	2396800000	2937600000	0.637847	0.0318298	3.32825	0.917456	P63244;J3KPE3;D6RAC2;H0YAF8;D6RHH4;H0Y8W2;D6REE5;H0YAM7;D6R9Z1;D6R9L0;D6RBD0;D6RFX4;D6RAU2;E9PD14;D6RFZ9;D6RF23;H0Y8R5;D6RGK8;D6RHJ5;D6R909;H0Y9P0;D6RDI0	P63244;J3KPE3;D6RAC2;H0YAF8;D6RHH4;H0Y8W2;D6REE5;H0YAM7;D6R9Z1;D6R9L0	Guanine nucleotide-binding protein subunit beta-2-like 1;Guanine nucleotide-binding protein subunit beta-2-like 1, N-terminally processed	GNB2L1
NaN	0.130799	NaN	NaN	NaN	NaN			4	4	4	5.2	5.2	5.2	119.79	8.5591	51148000	14101000	37046000	0	0.0307991	0	NaN	P52701-4;P52701-3;P52701;A0A087WWJ1;P52701-2;A0A087WYT6	P52701-4;P52701-3;P52701;A0A087WWJ1;P52701-2	DNA mismatch repair protein Msh6	MSH6
0.0775164	0.09815	0.212383	-0.364236	-0.408225	-0.199487			5	5	2	32.1	32.1	9.4	12.469	10.235	906730000	432120000	474620000	0.254529	0.0293497	1.66308	-0.423983	Q969Q0;R4GN19	Q969Q0	60S ribosomal protein L36a-like	RPL36AL
0.205142	0.0888201	0.0866479	-0.329051	-0.167766	-0.303579			77	77	77	55.3	55.3	55.3	192.06	323.31	70419000000	29328000000	41092000000	0.249255	0.0268701	1.74182	-0.366799	A0A087WVQ6;Q00610-2;Q00610;J3KS13;P53675-2;P53675;A0A087WX41;K7EJJ5;J3KSQ2;J3QL20;J3KRF5;F5H5N6;A0A087WV74;A0A087WXH4	A0A087WVQ6;Q00610-2;Q00610	Clathrin heavy chain;Clathrin heavy chain 1	CLTC
0.144438	0.0404014	0.194591	-0.118978	-0.0905725	-0.139999		+	10	10	10	42.4	42.4	42.4	23.577	43.097	18342000000	8867400000	9474500000	0.208436	0.0264769	2.36187	-0.216516	P40429;M0QYS1;Q8J015;Q6NVV1;M0QZU1;A0A096LPE0	P40429;M0QYS1;Q8J015	60S ribosomal protein L13a	RPL13A;RPL13a
0.0221902	0.166073	0.178619	0.117429	0.244278	-0.220513			6	6	6	42.2	42.2	42.2	26.131	78.409	1460900000	756990000	703960000	0.154714	0.022294	0.13108	-0.0529354	O75934	O75934	Pre-mRNA-splicing factor SPF27	BCAS2
0.121413	NaN	NaN	NaN	NaN	NaN			2	2	2	10.9	10.9	10.9	40.513	8.1034	144920000	57049000	87868000	0	0.0214134	0	NaN	Q9UBS4;H7C2Y5	Q9UBS4;H7C2Y5	DnaJ homolog subfamily B member 11	DNAJB11
0.215865	0.230326	-0.0830648	2.25302	2.52614	2.37993		+	14	14	11	71.9	71.9	61	37.497	195.64	21858000000	5922900000	15935000000	0.0676036	0.021042	2.92481	2.28636	Q15365;F8VTZ0;H3BSP4;C9K0A2;F8WC71;C9IZV9;C9J7A9;C9JSA6;C9J5V4;C9JTY5;C9JZY3;C9J0A4;F6TJN8;P57723-2;P57723	Q15365	Poly(rC)-binding protein 1	PCBP1
0.158337	0.0912597	0.10916	-0.190059	-0.137791	-0.197418		+	6	6	6	41.3	41.3	41.3	14.369	23.897	5382900000	2473900000	2909000000	0.364793	0.0195856	2.33505	-0.275089	C9JXB8;C9JNW5;P83731	C9JXB8;C9JNW5;P83731	60S ribosomal protein L24	RPL24
0.118493	NaN	NaN	NaN	NaN	-0.396897			4	4	4	16.7	16.7	16.7	38.938	14.82	218660000	123140000	95523000	0	0.0184926	0	-0.496897	O75319;H7C0E6;C9JYA6;O75319-2	O75319	RNA/RNP complex-1-interacting phosphatase	DUSP11
0.117961	NaN	NaN	0.190425	0.649569	0.74123			5	5	5	3.6	3.6	3.6	193.1	15.636	321170000	147780000	173390000	0	0.0179609	0.889172	0.427075	Q9H792;H3BUZ5;H0YN99	Q9H792	Pseudopodium-enriched atypical kinase 1	PEAK1
0.27453	0.0568609	0.0201999	0.273576	0.306845	0.341872			143	143	2	68.6	68.6	0.6	278.22	323.31	480900000000	193000000000	287910000000	0.0713126	0.0171969	2.04987	0.207431	Q60FE5;A0A087WWY3;F8WE98;H0Y5C6;H0Y5F3;H7C2E7	Q60FE5;A0A087WWY3		FLNA
0.174918	-0.173433	0.349818	0.293724	0.19333	0.192952			15	15	15	54	54	54	38.438	68.086	3532900000	1754200000	1778700000	0.0354506	0.0171009	1.19747	0.126668	Q9Y3F4;Q9Y3F4-2;H0YH33	Q9Y3F4;Q9Y3F4-2	Serine-threonine kinase receptor-associated protein	STRAP
0.0825664	0.0714881	0.194465	-0.172213	-0.306323	-0.150817			10	10	10	55.5	55.5	55.5	12.538	30.814	12556000000	6016900000	6539100000	0.142404	0.0161732	1.62345	-0.309785	P18077;C9K025;F8WBS5;F8WB72	P18077;C9K025;F8WBS5;F8WB72	60S ribosomal protein L35a	RPL35A
0.0908535	0.104605	0.152768	-0.262677	-0.341226	-0.398418			16	16	16	70.3	70.3	70.3	16.06	55.699	32597000000	16642000000	15955000000	0.316949	0.0160754	2.0907	-0.434107	P39019;A0A075B6E2;M0R2L9;M0QXK4;M0QYF7;M0R140	P39019;A0A075B6E2	40S ribosomal protein S19	RPS19
0.165558	0.116232	0.0650208	-0.10341	-0.2041	-0.193354			8	8	8	39.2	39.2	39.2	16.561	27.549	6358000000	3007700000	3350300000	0.190665	0.0156036	1.85386	-0.266955	P46776;E9PLL6;E9PJD9;E9PLX7	P46776;E9PLL6;E9PJD9	60S ribosomal protein L27a	RPL27A
0.00891703	0.1133	0.223052	0.292193	0.141302	0.138683			24	24	24	28.9	28.9	28.9	124.2	142.99	7342300000	3176000000	4166300000	0.0809632	0.0150897	0.666223	0.0907261	Q9NQW6;Q9NQW6-2;H7C1K5;H7C3S1;H7C1C2;C9JJT6;H7C0Y6;H7C167	Q9NQW6;Q9NQW6-2	Actin-binding protein anillin	ANLN
0.164658	0.0791561	0.0990932	-0.121204	-0.0765085	-0.0395476			34	34	34	59.6	59.6	59.6	82.999	323.31	40876000000	19247000000	21629000000	0.196965	0.0143023	1.77117	-0.179087	P40939;H0YFD6;P40939-2	P40939	Trifunctional enzyme subunit alpha, mitochondrial;Long-chain enoyl-CoA hydratase;Long chain 3-hydroxyacyl-CoA dehydrogenase	HADHA
0.100305	0.0676387	0.174918	-0.31937	-0.215446	-0.280265		+	15	15	15	57.6	57.6	57.6	24.831	116.7	40100000000	20952000000	19147000000	0.156909	0.0142871	2.18165	-0.371693	P62906	P62906	60S ribosomal protein L10a	RPL10A
0.1133	0.033793	0.194591	-0.15258	-0.107057	-0.168836		+	7	7	7	46.6	46.6	46.6	15.616	32.282	5613500000	2517800000	3095700000	0.100767	0.0138949	2.24051	-0.242825	D3YTB1;F8W727;P62910;D3YTI8	D3YTB1;F8W727;P62910	60S ribosomal protein L32	RPL32
0.113834	NaN	NaN	NaN	NaN	NaN			4	3	3	4.7	3.7	3.7	111.66	13.497	169200000	73233000	95964000	0	0.0138339	0	NaN	A0A0C4DGS5;Q08379-2;Q08379;A0A087WYC0;B7ZC06	A0A0C4DGS5;Q08379-2;Q08379;A0A087WYC0	Golgin subfamily A member 2	GOLGA2
0.140255	0.0820213	0.115166	-0.205813	-0.232769	-0.164642		+	9	9	9	67	67	67	12.784	90.409	18919000000	9576400000	9342900000	0.270565	0.012481	2.36644	-0.301075	P62888;E5RI99;A0A0C4DH44;A0A0B4J213;E5RJH3	P62888;E5RI99	60S ribosomal protein L30	RPL30
-0.174605	0.480162	0.0299829	-0.277709	0.410124	0.177727			3	3	3	8	8	8	48.897	5.6477	669200000	280250000	388950000	0.0192121	0.0118465	0.00516931	0.00338053	Q9UN37;I3L4J1;O75351;Q6PIW4-2;Q6PIW4	Q9UN37;I3L4J1	Vacuolar protein sorting-associated protein 4A	VPS4A
0.172487	0.0458623	0.115965	-0.0455952	0.0082	-0.314751			8	8	8	17.5	17.5	17.5	97.039	79.416	1304800000	612040000	692790000	0.10549	0.0114384	0.791771	-0.217382	P19022-2;P19022;C9J8J8;C9J126;A0A0G2JRA4;A0A087WX99;P55283-2;P55283	P19022-2;P19022	Cadherin-2	CDH2
-0.163898	0.40021	0.0936954	-0.903306	0.041243	-0.278934			10	10	10	32.3	32.3	32.3	43.122	49.789	3606500000	2048200000	1558300000	0.0192414	0.0100025	0.646994	-0.480332	Q08431;X6R3G6;F5GZN3;Q08431-2;Q08431-3;H0YKS8;A0A087WUV5	Q08431;X6R3G6;F5GZN3;Q08431-2;Q08431-3;H0YKS8	Lactadherin;Lactadherin short form;Medin	MFGE8
NaN	0.108625	NaN	NaN	NaN	-1.13157			3	3	3	12.1	12.1	12.1	36.313	32.477	273740000	153690000	120040000	0	0.00862479	0	-1.23157	Q07352;G3V2D5;G3V515;G3V2P5;A0A087WUU9;P47974	Q07352	Zinc finger protein 36, C3H1 type-like 1	ZFP36L1
NaN	0.302992	-0.0888224	0.466653	0.20364	0.259062			6	6	6	17.4	17.4	17.4	44.596	16.685	685830000	322390000	363440000	0.0101109	0.00708465	0.920965	0.209785	Q96DV4;Q96DV4-2	Q96DV4	39S ribosomal protein L38, mitochondrial	MRPL38
0.0618453	0.273695	-0.0214968	-0.128298	-0.081278	0.245739			7	7	7	21.7	21.7	21.7	39.542	23.215	1089800000	410490000	679350000	0.0166648	0.00468112	0.273581	-0.0879457	Q8WVM0	Q8WVM0	Dimethyladenosine transferase 1, mitochondrial	TFB1M
0.10165	NaN	0.107018	0.407842	NaN	NaN			70	1	0	56.9	1.2	0	153.67	13.264	668710000	316130000	352580000	0.452227	0.00433415	0	0.307842	Q8WWI1-3;J3KP06;Q8WWI1;Q8WWI1-4;Q8WWI1-2;E9PMT2;A0A0A0MTE2;Q8WWI1-5;H0Y424;H0YE95;E9PJ10;E9PK58;E9PLU6;U3KQE6;E9PRE3;E9PRJ0	Q8WWI1-3;J3KP06;Q8WWI1;Q8WWI1-4;Q8WWI1-2;E9PMT2;A0A0A0MTE2;Q8WWI1-5;H0Y424	LIM domain only protein 7	LMO7
0.147567	0.0429245	0.11929	0.291721	0.425352	0.185613			6	6	6	32.6	32.6	32.6	31.705	23.777	834190000	414540000	419650000	0.0331871	0.00326047	0.994004	0.200895	Q9H2W6;A0A087WT90;A0A087WT51	Q9H2W6	39S ribosomal protein L46, mitochondrial	MRPL46
0.102994	NaN	NaN	NaN	NaN	NaN			3	3	3	8	8	8	43.521	3.7613	89357000	40575000	48782000	0	0.00299399	0	NaN	A0A087WXT2;O15226;O15226-2	A0A087WXT2;O15226;O15226-2	NF-kappa-B-repressing factor	NKRF
0.335826	-0.134968	0.107688	-1.53671	NaN	NaN			5	5	5	47.9	47.9	47.9	15.054	24.68	810380000	681330000	129050000	0.00648323	0.00284867	0	-1.63671	P07737;K7EJ44;CON__P02584;I3L3D5	P07737;K7EJ44	Profilin-1	PFN1
0.107956	0.0717627	0.127237	-0.0798287	-0.0835386	-0.0964527		+	11	11	11	43	43	43	16.273	114.85	22131000000	11456000000	10675000000	0.0459094	0.00231848	3.13779	-0.186607	P62263;H0YB22;E5RH77	P62263;H0YB22;E5RH77	40S ribosomal protein S14	RPS14
0.136716	0.0500489	0.111566	-0.204084	-0.34055	-0.206362			22	21	19	46.2	46.2	44.6	61.516	165.76	13963000000	6280100000	7682700000	0.00668769	-0.000556376	1.79098	-0.350332	P07196;A0A087X0W2	P07196;A0A087X0W2	Neurofilament light polypeptide	NEFL
0.0820213	0.196355	0.0106367	0.250598	0.316609	0.169027			7	7	7	37.1	37.1	37.1	31.821	29.176	729900000	296210000	433690000	0.0212821	-0.00366224	1.11683	0.145411	Q15024	Q15024	Exosome complex component RRP42	EXOSC7
0.0923428	0.115699	0.0794293	-0.481445	-0.38777	-0.379038		+	18	18	18	61.2	61.2	61.2	34.273	275.76	102520000000	54384000000	48139000000	0.135515	-0.00417625	2.39692	-0.516084	P05388;F8VWS0;P05388-2;F8VU65;F8VW21;F8VPE8;G3V210;F8VQY6;F8VRK7;F8VZS0;Q8NHW5;F8VWV4;F8VS58;F8W1K8	P05388;F8VWS0;P05388-2;F8VU65;F8VW21;F8VPE8;G3V210;F8VQY6;F8VRK7;F8VZS0;Q8NHW5;F8VWV4;F8VS58	60S acidic ribosomal protein P0;60S acidic ribosomal protein P0-like	RPLP0;RPLP0P6
-0.156145	NaN	0.347779	1.05499	1.03154	1.18129		+	6	6	6	19.7	19.7	19.7	48.349	38.301	1292200000	472310000	819880000	0.00461388	-0.00418284	2.65705	0.989272	O75616;J3QSB2;J3QRV9;O75616-2;K7EQJ8;J3QT61	O75616;J3QSB2;J3QRV9;O75616-2	GTPase Era, mitochondrial	ERAL1
NaN	-0.167507	0.357383	NaN	NaN	NaN			2	2	2	6.4	6.4	6.4	41.138	7.7572	83566000	33355000	50210000	0.00536492	-0.00506187	0	NaN	Q9BVQ7-3;Q9BVQ7-2;Q9BVQ7	Q9BVQ7-3;Q9BVQ7-2;Q9BVQ7	Spermatogenesis-associated protein 5-like protein 1	SPATA5L1
0.158596	0.0306892	NaN	-0.234431	NaN	0.15782			9	5	2	27	18.2	8.8	42.835	39.795	787500000	411580000	375930000	0.0237455	-0.00535765	0.215391	-0.138306	F8W8I6;P31483;P31483-3;E5RGV5;E5RG67	F8W8I6;P31483;P31483-3;E5RGV5;E5RG67	Nucleolysin TIA-1 isoform p40	TIA1
0.179256	0.102322	0.00216244	-0.0549767	-0.0352243	-0.140078			179	179	4	75.5	75.5	1.4	284.54	323.31	387350000000	160940000000	226420000000	0.0336428	-0.00541968	1.50085	-0.17676	Q13813;Q13813-2;A0A0D9SGF6;A0A0D9SFF6;A0A0D9SFH4	Q13813;Q13813-2;A0A0D9SGF6	Spectrin alpha chain, non-erythrocytic 1	SPTAN1
0.0953169	NaN	0.0936954	NaN	NaN	NaN			1	1	1	9.4	9.4	9.4	13.293	3.9279	93299000	40624000	52675000	1.03026	-0.00549385	0	NaN	P52435	P52435	DNA-directed RNA polymerase II subunit RPB11-a	POLR2J
0.0784732	0.0124972	0.19131	-0.0715425	-0.121079	-0.545277			29	29	29	29.7	29.7	29.7	134.55	150.77	10254000000	4722600000	5531700000	0.0360924	-0.00590654	0.829682	-0.345966	Q92896;Q92896-3;Q92896-2;H3BM42;H3BQU9;H3BQT1;H3BRD8	Q92896;Q92896-3;Q92896-2;H3BM42	Golgi apparatus protein 1	GLG1
NaN	0.0939657	NaN	NaN	NaN	-0.483218			2	2	2	30.2	30.2	30.2	10.135	6.4172	50026000	25073000	24953000	0	-0.0060343	0	-0.583218	Q9BWJ5	Q9BWJ5	Splicing factor 3B subunit 5	SF3B5
0.0335111	0.14496	0.102994	-1.50902	0.527371	0.377179			26	13	13	42.3	20.6	20.6	84.659	323.31	6577100000	5694100000	883000000	0.0620976	-0.00617831	0.160778	-0.30149	P07900;P07900-2;G3V2J8;Q58FG0;Q58FG1	P07900;P07900-2	Heat shock protein HSP 90-alpha	HSP90AA1
0.153676	0.033793	NaN	NaN	NaN	-0.331209			2	2	2	4.2	4.2	4.2	57.81	7.5531	213310000	107190000	106120000	0.0297949	-0.00626565	0	-0.431209	O00505;H0Y4S9	O00505;H0Y4S9	Importin subunit alpha-4	KPNA3
0.0936954	NaN	NaN	NaN	NaN	0.132774			2	2	2	11.2	11.2	11.2	25.62	6.689	53274000	26398000	26876000	0	-0.00630455	0	0.0327743	A0A075B797;M0R3B2;A0A075B6F9;Q9Y314;M0QX85;M0R1K2	A0A075B797;M0R3B2;A0A075B6F9;Q9Y314;M0QX85;M0R1K2	Nitric oxide synthase-interacting protein	NOSIP
0.0920721	0.181421	0.00647761	0.507617	0.507922	0.522658		+	6	6	6	29.8	29.8	29.8	26.383	20.289	1527200000	693810000	833360000	0.0424264	-0.00667659	3.8398	0.412732	Q9NPD3;E9PI41;E9PPI9	Q9NPD3;E9PI41	Exosome complex component RRP41	EXOSC4
0.145612	0.0792927	0.0486547	-0.219085	-0.328725	-0.0852518			13	13	13	59.9	59.9	59.9	15.747	82.184	14189000000	6926600000	7262200000	0.10392	-0.00881347	1.32234	-0.311021	P46779;H0YKD8;P46779-2;P46779-3;H0YMF4;P46779-4;P46779-5;H0YLP6	P46779;H0YKD8;P46779-2;P46779-3;H0YMF4;P46779-4;P46779-5;H0YLP6	60S ribosomal protein L28	RPL28
-0.440146	0.68437	0.0280033	NaN	NaN	NaN			3	3	3	2.9	2.9	2.9	138.86	7.3038	78396000	29041000	49355000	0.00880401	-0.00925758	0	NaN	E3W994;H0Y5T1;J3KR49;A0A0U1RQI6;F8WA11;E7ERI8;E7EW49;O75122;Q7Z460-2;Q7Z460-4;Q7Z460-5;Q7Z460-3;O75122-3;Q7Z460;H7C5M8	E3W994;H0Y5T1;J3KR49;A0A0U1RQI6;F8WA11;E7ERI8;E7EW49;O75122;Q7Z460-2;Q7Z460-4;Q7Z460-5;Q7Z460-3;O75122-3;Q7Z460	CLIP-associating protein 2;CLIP-associating protein 1	CLASP2;CLASP1
0.095587	0.0821575	0.0924781	-0.062746	-0.0825911	-0.0322411			19	19	19	76	76	76	16.445	55.147	47550000000	24071000000	23479000000	0.871833	-0.00992581	2.07806	-0.159193	P62249;M0R210;A0A087WZ27;M0R3H0;M0R1M5;Q6IPX4;M0QX76	P62249;M0R210;A0A087WZ27;M0R3H0;M0R1M5;Q6IPX4	40S ribosomal protein S16	RPS16;ZNF90
0.181802	0.0176369	0.068602	-0.0402595	0.0746424	0.0941009			3	3	3	26.8	26.8	26.8	16.996	12.655	354170000	168200000	185970000	0.0723406	-0.0106529	0.514499	-0.0571721	C9JLU1;P52434-3;P52434;P52434-4;P52434-5;P52434-2	C9JLU1;P52434-3;P52434;P52434-4	DNA-directed RNA polymerases I, II, and III subunit RPABC3	POLR2H
0.0878702	NaN	NaN	0.880646	0.883621	0.606632			3	3	3	15.6	15.6	15.6	21.905	6.9375	191770000	85292000	106480000	0	-0.0121298	1.76338	0.6903	J3KS15;Q14197	J3KS15;Q14197	Peptidyl-tRNA hydrolase ICT1, mitochondrial	ICT1
NaN	0.148739	0.024887	NaN	NaN	NaN			4	4	4	9.4	9.4	9.4	66.049	8.3588	45954000	18840000	27114000	0.0622674	-0.013187	0	NaN	O00567;H0Y653;H0YDU4;Q5JXT2	O00567;H0Y653;H0YDU4	Nucleolar protein 56	NOP56
0.102457	0.173255	-0.0164682	0.280838	0.222434	-0.146483			5	5	5	32.4	32.4	32.4	29.572	39.957	744750000	395370000	349380000	0.0814411	-0.0135854	0.0455456	0.0189293	Q9NQT5;Q9NQT5-2	Q9NQT5;Q9NQT5-2	Exosome complex component RRP40	EXOSC3
0.108759	0.00374607	0.145873	-0.231938	-0.329976	-0.191129			18	18	18	45.5	45.5	45.5	29.995	181.91	34741000000	17267000000	17474000000	0.110483	-0.0138741	1.8697	-0.351014	P62424;Q5T8U2;Q5T8U3	P62424;Q5T8U2;Q5T8U3	60S ribosomal protein L7a	RPL7A
0.0896338	0.10675	0.0610158	-0.0900656	-0.18236	-0.157785			8	8	8	41.9	41.9	41.9	18.565	79.203	12090000000	5926300000	6163600000	0.399411	-0.0142	1.89922	-0.243404	P46778;G3V1B3;M0R181;M0R3I5	P46778;G3V1B3;M0R181	60S ribosomal protein L21	RPL21
NaN	NaN	0.0829751	NaN	NaN	NaN			3	3	3	2.2	2.2	2.2	182.77	5.5977	34049000	11975000	22074000	0	-0.0170249	0	NaN	Q8NI27;A0A0C4DG98;F2Z2V2	Q8NI27;A0A0C4DG98	THO complex subunit 2	THOC2
0.240742	0.0251707	-0.0179136	-0.0488748	-0.0365111	-0.110059			159	159	14	71.3	71.3	7.7	274.61	323.31	454800000000	190720000000	264080000000	0.0713093	-0.0173338	1.73441	-0.165148	Q01082;A0A087WUZ3;Q01082-2;F8W6C1;P11277-3;P11277;P11277-2;E9PJZ2;H0YJE6	Q01082;A0A087WUZ3;Q01082-2	Spectrin beta chain, non-erythrocytic 1	SPTBN1
-0.108752	0.0465608	0.309642	-0.118007	-0.60931	0.489543			4	4	4	8	8	8	56.547	7.0563	257730000	134700000	123030000	0.0462	-0.0175164	0.200981	-0.179258	Q96GM8;Q96GM8-2	Q96GM8;Q96GM8-2	Target of EGR1 protein 1	TOE1
0.13711	0.10675	0.00288247	-0.183327	-0.245437	-0.443968			27	27	27	22.5	22.5	22.5	181.79	231.67	7076100000	3146800000	3929300000	0.151891	-0.0177524	1.41871	-0.390911	Q9C0C2;Q9C0C2-2;E9PKK0	Q9C0C2;Q9C0C2-2	182 kDa tankyrase-1-binding protein	TNKS1BP1
-0.566912	0.731009	NaN	NaN	NaN	NaN			4	4	4	3.1	3.1	3.1	281.76	17.553	156330000	65513000	90816000	0.00771412	-0.0179515	0	NaN	A0A0A0MSD6;Q9P273	A0A0A0MSD6;Q9P273	Teneurin-3	TENM3
0.0543624	0.0614305	0.128953	1.3789	1.3058	0.967169			12	9	9	61.3	49.1	49.1	33.496	156.84	7490500000	3787400000	3703100000	0.284372	-0.018418	1.8982	1.11729	Q15366-7;Q15366-4;Q15366-8;Q15366-5;Q15366-6;Q15366-3;H3BRU6;F8VZX2;Q15366;Q15366-2;F8W0G4;F8VXH9;F8W1G6;E9PFP8;P57721-5;P57721-4;P57721;F8VRH0;J3QT27;P57721-2;P57721-3;H3BSS4;H3BND9	Q15366-7;Q15366-4;Q15366-8;Q15366-5;Q15366-6;Q15366-3;H3BRU6;F8VZX2;Q15366;Q15366-2;F8W0G4;F8VXH9	Poly(rC)-binding protein 2	PCBP2
0.0614305	0.0610158	0.121281	0.490775	0.152508	0.204516			16	16	16	28.1	28.1	28.1	82.3	147.32	2971400000	1311600000	1659800000	0.349026	-0.0187577	0.64851	0.1826	O75330-2;O75330;O75330-3;O75330-4;E5RIH2;E5RI30	O75330-2;O75330;O75330-3;O75330-4	Hyaluronan mediated motility receptor	HMMR
0.0753272	0.109427	0.0586628	-0.377838	-0.210246	-0.133875			9	9	9	34.1	34.1	34.1	28.68	65.364	18560000000	9610100000	8950200000	0.476185	-0.0188609	1.37739	-0.340653	P62753;A2A3R5;A2A3R7	P62753;A2A3R5	40S ribosomal protein S6	RPS6
0.0606008	-0.0525508	0.227864	-0.19484	-0.281176	-0.207461		+	187	187	24	30.3	30.3	4.6	860.65	323.31	41363000000	18813000000	22550000000	0.0874296	-0.0213619	2.17541	-0.327826	Q03001;F8W9J4;Q03001-9	Q03001;F8W9J4	Dystonin	DST
0.0784732	NaN	NaN	NaN	NaN	NaN			2	2	2	3.5	3.5	3.5	88.725	5.3665	53223000	24281000	28941000	0	-0.0215268	0	NaN	Q3KQU3-2;Q3KQU3-4;Q3KQU3;Q3KQU3-3	Q3KQU3-2;Q3KQU3-4;Q3KQU3;Q3KQU3-3	MAP7 domain-containing protein 1	MAP7D1
0.0777899	NaN	NaN	NaN	NaN	1.71787			1	1	1	4	4	4	45.348	7.5405	106650000	33295000	73351000	0	-0.0222101	0	1.61787	Q9H5Q4	Q9H5Q4	Dimethyladenosine transferase 2, mitochondrial	TFB2M
0.0254541	0.0681893	0.137766	-0.0339978	-0.111321	-0.200117			5	5	5	45.2	45.2	45.2	13.015	17.211	9624700000	4882600000	4742100000	0.254053	-0.0228636	1.33414	-0.215145	P62854;Q5JNZ5	P62854;Q5JNZ5	40S ribosomal protein S26;Putative 40S ribosomal protein S26-like 1	RPS26;RPS26P11
0.0647449	0.0958569	0.0708015	-0.0163807	-0.0416101	-0.0893134			9	9	9	52.9	52.9	52.9	14.865	51.877	23194000000	11790000000	11405000000	0.859016	-0.0228656	1.69992	-0.149101	P62829;C9JD32;J3KT29;B9ZVP7;J3KTJ3;J3QQT9	P62829;C9JD32;J3KT29;B9ZVP7	60S ribosomal protein L23	RPL23
-0.0399925	0.139208	0.126312	NaN	NaN	NaN			9	9	9	18.5	18.5	18.5	81.242	30.264	418520000	167740000	250780000	0.149371	-0.0248243	0	NaN	Q9Y4W2-2;Q9Y4W2;Q9Y4W2-3;Q9Y4W2-4	Q9Y4W2-2;Q9Y4W2;Q9Y4W2-3;Q9Y4W2-4	Ribosomal biogenesis protein LAS1L	LAS1L
0.0199154	0.0880058	0.1121	0.126444	0.0886844	-0.00576786			81	81	75	94.8	94.8	90.6	53.651	323.31	8108200000000	4170200000000	3938000000000	0.360483	-0.0266597	0.281854	-0.0302131	P08670;B0YJC4;B0YJC5;Q5JVS8;H7C5W5;P17661;P41219;P41219-2;F8W835;K7EKH6	P08670;B0YJC4	Vimentin	VIM
0.018919	0.0724488	0.128557	0.270828	0.299245	0.0930192			48	48	48	46.9	46.9	46.9	136.38	323.31	22050000000	10824000000	11225000000	0.311707	-0.0266916	0.695641	0.121031	Q9P2M7;Q9P2M7-2;A6PVU7;A2A3M4;H0Y4A8;Q0VF96-2;Q0VF96	Q9P2M7;Q9P2M7-2	Cingulin	CGN
0.072586	0.0869197	0.0596321	-0.152965	-0.110667	-0.232803			8	8	8	27.5	27.5	27.5	23.134	59.311	7315100000	3824700000	3490400000	1.11988	-0.0269541	1.75174	-0.265478	J3QR09;J3KTE4;P84098;J3QL15	J3QR09;J3KTE4;P84098;J3QL15	Ribosomal protein L19;60S ribosomal protein L19	RPL19
0.0494913	0.237197	-0.0680598	0.51783	0.473839	0.529571		+	10	10	10	9.3	9.3	9.3	150.6	59.149	705610000	322720000	382890000	0.102873	-0.027124	2.7615	0.40708	Q96RT1-6;Q96RT1-4;Q96RT1-5;Q96RT1-3;Q96RT1-9;Q96RT1-2;Q96RT1;Q96RT1-8;Q96RT1-7;B4DIP2;A0A075B6E9;Q96NW7-2;Q96NW7;H0Y9E8;B1AKT2;Q96NW7-3	Q96RT1-6;Q96RT1-4;Q96RT1-5;Q96RT1-3;Q96RT1-9;Q96RT1-2;Q96RT1;Q96RT1-8;Q96RT1-7;B4DIP2	Protein LAP2	ERBB2IP
0.0206267	0.14274	0.054779	-0.248673	-0.218011	-0.0178552			7	7	7	45.9	45.9	45.9	22.083	49.163	2170100000	1162300000	1007800000	0.27456	-0.0272847	1.16254	-0.261513	Q9BRJ6;C9JQV0;H7C0T1;H7C2R9	Q9BRJ6;C9JQV0;H7C0T1;H7C2R9	Uncharacterized protein C7orf50	C7orf50
0.0483758	-0.0778478	0.244765	NaN	NaN	0.562963			3	3	3	20.3	20.3	20.3	15.173	7.1897	601270000	277530000	323750000	0.101306	-0.0282356	0	0.462963	O15235	O15235	28S ribosomal protein S12, mitochondrial	MRPS12
0.0965318	-0.0140042	0.132379	0.224164	-0.0290874	-0.363679			5	5	5	25.1	25.1	25.1	20.834	18.208	1764000000	949850000	814140000	0.232371	-0.0283643	0.341307	-0.156201	Q9NY12-2;Q9NY12	Q9NY12-2;Q9NY12	H/ACA ribonucleoprotein complex subunit 1	GAR1
0.0708015	NaN	NaN	-0.782695	NaN	-0.925659			7	5	5	20.3	15.7	15.7	42.632	10.695	361120000	188510000	172610000	0	-0.0291985	1.32236	-0.954177	A0A0A0MRX1;Q12926-2;Q12926;B1APY9;B1APY8;A0A0R4J2E6;P26378-4;P26378-2;P26378-5;P26378;P26378-3;B1AM48;Q14576-2;Q14576;C9JB16	A0A0A0MRX1;Q12926-2;Q12926;B1APY9;B1APY8;A0A0R4J2E6;P26378-4;P26378-2;P26378-5;P26378;P26378-3;B1AM48	ELAV-like protein;ELAV-like protein 2;ELAV-like protein 4	ELAVL2;ELAVL4
0.070252	NaN	NaN	NaN	NaN	NaN			3	3	3	3.8	3.8	3.8	99.057	5.1145	90558000	48597000	41962000	0	-0.029748	0	NaN	Q96QC0	Q96QC0	Serine/threonine-protein phosphatase 1 regulatory subunit 10	PPP1R10
-0.0163953	0.112767	0.111031	0.261591	0.171591	-0.00811629			37	37	30	56.3	56.3	47.8	100.07	323.31	13746000000	6804800000	6940900000	0.263248	-0.0308657	0.186093	0.0416886	P35221;P35221-2;G3XAM7;P35221-3;E5RIB1;E5RG03;E5RJ41;E5RGY6;E5RHV7;E5RGD2;H0YBB8;E5RGY7;E5RJL0;E5RIE0;E5RJP7;E5RFM3;E5RFM5;E5RJZ2;E5RIT8;E5RFG3;E5RFK9;Q9UI47	P35221;P35221-2;G3XAM7;P35221-3	Catenin alpha-1	CTNNA1
0.153546	0.10608	-0.0523563	0.0969364	0.761711	1.36776			10	10	8	15.2	15.2	12	84.109	26.219	857030000	355990000	501040000	0.174759	-0.03091	0.653129	0.642137	G3V325;O75127;C9JJT5;P56134-4;P56134-2;C9JU26;C9JGL8	G3V325;O75127	Pentatricopeptide repeat-containing protein 1, mitochondrial	ATP5J2-PTCD1;PTCD1
0.0123541	0.134089	0.0557509	0.118758	-0.229551	-0.204433			25	25	25	39.5	39.5	39.5	96.395	221.89	9824500000	4619300000	5205200000	0.340385	-0.0326018	0.679907	-0.205075	Q8N3V7-2;Q8N3V7-3;Q8N3V7	Q8N3V7-2;Q8N3V7-3;Q8N3V7	Synaptopodin	SYNPO
0.0666747	NaN	NaN	NaN	NaN	0.0251707			2	2	2	32.9	32.9	32.9	9.5086	29.201	121240000	58282000	62957000	0	-0.0333253	0	-0.0748293	Q96HQ2-2;Q96HQ2	Q96HQ2-2;Q96HQ2	CDKN2AIP N-terminal-like protein	CDKN2AIPNL
-0.0713909	0.0381553	0.228603	NaN	-0.914331	NaN			2	2	2	13.5	13.5	13.5	20.61	7.4674	93411000	43777000	49634000	0.137195	-0.0348775	0	-1.01433	H3BTH5;H3BRB3;Q14807-2;Q14807	H3BTH5;H3BRB3;Q14807-2;Q14807	Kinesin-like protein;Kinesin-like protein KIF22	KIF22
-0.00416092	0.117429	0.0805212	-0.0928017	-0.145175	-0.124692		+	14	7	7	41.6	25.6	25.6	49.263	161.52	19278000000	10510000000	8768200000	0.36755	-0.0354035	2.32559	-0.220889	P55795	P55795	Heterogeneous nuclear ribonucleoprotein H2	HNRNPH2
0.101784	0.0236102	0.067088	-0.216786	-0.197021	-0.163478		+	19	19	17	68	68	61.4	45.671	323.31	145430000000	76945000000	68484000000	0.595372	-0.0358391	2.5499	-0.292428	P52597	P52597	Heterogeneous nuclear ribonucleoprotein F;Heterogeneous nuclear ribonucleoprotein F, N-terminally processed	HNRNPF
0.0429245	0.0805212	NaN	NaN	NaN	0.0543624			6	5	5	28.8	24.5	24.5	37.19	43.395	857750000	440430000	417320000	0.536668	-0.0382772	0	-0.0456376	Q52LJ0;Q52LJ0-2;H0YNA1	Q52LJ0;Q52LJ0-2	Protein FAM98B	FAM98B
NaN	-0.0539728	0.17645	0.159242	0.271426	-0.203402			8	1	1	10.5	2	2	100.45	19.604	551010000	280810000	270200000	0.100512	-0.0387612	0.0549253	-0.0242449	P26232-2;P26232-5;P26232;P26232-3;A0A0A0MRI5;P26232-4;P26232-6;A0A0A0MTJ6;C9J144;C9IZ88;REV__Q9P2T0-2;REV__Q9P2T0	P26232-2;P26232-5;P26232;P26232-3;A0A0A0MRI5;P26232-4;P26232-6	Catenin alpha-2	CTNNA2
0.049352	0.0728604	NaN	1.34056	0.818114	0.977829			5	5	5	25.1	25.1	25.1	27.013	12.144	764090000	324770000	439320000	0.728533	-0.0388938	1.59009	0.945502	Q9HBH1	Q9HBH1	Peptide deformylase, mitochondrial	PDF
0.220454	-0.0541676	0.0139266	0.0680517	0.271904	-0.0215407			6	6	6	48.5	48.5	48.5	25.249	55.251	497760000	250660000	247100000	0.169774	-0.0399291	0.0222434	0.00613821	Q9NQT4;M0R050;M0R102;M0R289	Q9NQT4;M0R050	Exosome complex component RRP46	EXOSC5
0.0866479	0.0265876	0.0666747	-0.208078	-0.190207	-0.125573			22	22	22	64.8	64.8	64.8	29.945	303.23	142980000000	76283000000	66696000000	0.819378	-0.0400299	2.08489	-0.274619	P61247;H0Y9Y4;D6RG13;D6RAT0;E9PFI5;H0Y8L7;D6RB09;D6R9B6;D6RAS7;D6RI02;D6RED7;D6RGE0	P61247;H0Y9Y4;D6RG13;D6RAT0;E9PFI5;H0Y8L7;D6RB09;D6R9B6	40S ribosomal protein S3a	RPS3A
0.145873	0.00949053	0.0229004	0.131194	0.166073	0.194591			36	36	36	40.4	40.4	40.4	134.41	282.4	27429000000	11164000000	16266000000	0.348251	-0.0405786	1.13518	0.0639528	A1L390;A1L390-3;A0A0U1RR71;G3V311;A1L390-2;G3V278;G3V3I3;C9J7S4;C9JVL3;E7ESZ3;H7BXC7;Q9H7P9-2;Q9H7P9-3;Q9H7P9	A1L390;A1L390-3;A0A0U1RR71	Pleckstrin homology domain-containing family G member 3	PLEKHG3
0.0556121	NaN	NaN	NaN	NaN	NaN			1	1	1	1.6	1.6	1.6	65.248	2.2461	102010000	35428000	66579000	0	-0.0443879	0	NaN	Q4AC99	Q4AC99	Probable inactive 1-aminocyclopropane-1-carboxylate synthase-like protein 2	ACCSL
0.240253	-0.152179	0.0787465	-0.296297	-0.30036	-0.269651		+	4	4	4	29.3	29.3	29.3	14.551	23.337	3249700000	1570000000	1679700000	0.134155	-0.0443932	3.21247	-0.388769	P42766;F2Z388	P42766;F2Z388	60S ribosomal protein L35	RPL35
0.0319598	0.0478175	0.0831112	0.603122	0.292428	0.264236			16	16	16	26.8	26.8	26.8	88.549	108.62	2307200000	1029800000	1277400000	1.02594	-0.0457038	0.92618	0.286595	Q13263;Q13263-2;M0R0K9;M0R3C0;M0R2I3	Q13263;Q13263-2;M0R0K9	Transcription intermediary factor 1-beta	TRIM28
-0.0395921	-0.0458483	0.247806	0.0182068	0.0107799	0.0267293		+	448	3	3	78.2	0.5	0.5	516.19	30.63	49532000000	26135000000	23397000000	0.165953	-0.0458781	2.49664	-0.081428	Q15149-4	Q15149-4	Plectin	PLEC
0.246834	-0.139442	NaN	NaN	0.920903	1.39736			4	4	4	17.2	17.2	17.2	34.358	10.219	374080000	139290000	234790000	0.0704792	-0.0463044	0.851241	1.05913	Q96E29-3;Q96E29-2;Q96E29;E5RIK9;E5RIY4	Q96E29-3;Q96E29-2;Q96E29;E5RIK9;E5RIY4	Transcription termination factor 3, mitochondrial	MTERF3
0.0264459	0.0119249	0.121679	-0.0300299	0.0840642	0.248656			29	29	26	54.5	54.5	50.4	85.496	245.43	9284900000	4639800000	4645100000	0.51132	-0.0466502	0.00341812	0.000896833	P35222;B4DGU4;E7EMJ5;P35222-2;E9PDF9;E7EV28;C9IZ65	P35222;B4DGU4	Catenin beta-1	CTNNB1
0.06226	0.041243	0.0563061	-0.246875	-0.220412	-0.399007			41	41	41	65.7	65.7	65.7	73.62	278.02	78223000000	41469000000	36754000000	1.75834	-0.0467303	1.70158	-0.388765	P52272-2;P52272;A0A087X0X3;M0R019;M0QZM1;M0R2T0;M0R0N3;M0R2I7;M0QYQ7;M0QY96;M0R0Y6;M0QYL3	P52272-2;P52272;A0A087X0X3	Heterogeneous nuclear ribonucleoprotein M	HNRNPM
0.0673633	0.135141	-0.0455356	-0.326208	-0.217407	-0.0580223			9	9	9	36.2	36.2	36.2	43.312	93.832	13851000000	7460300000	6390300000	0.336214	-0.0476772	1.21427	-0.300546	K7EQ55;K7EK33;Q96EP5-2;Q96EP5;K7EQ02	K7EQ55;K7EK33;Q96EP5-2;Q96EP5;K7EQ02	DAZ-associated protein 1	DAZAP1
0.051024	NaN	NaN	NaN	NaN	NaN			2	2	2	3	3	3	86.16	68.34	108830000	45558000	63269000	0	-0.048976	0	NaN	Q9Y5V3;Q9Y5V3-2	Q9Y5V3;Q9Y5V3-2	Melanoma-associated antigen D1	MAGED1
0.0395595	0.0639171	0.049352	0.194717	0.165044	0.207768			14	14	2	54.5	54.5	8.4	20.252	57.306	49852000000	25136000000	24716000000	1.6951	-0.0490571	1.7098	0.0891763	P62913	P62913	60S ribosomal protein L11	RPL11
-0.000375143	0.115832	0.0356239	-0.15637	-0.296191	-0.170637			7	7	7	66.3	66.3	66.3	10.275	25.443	1089300000	558980000	530360000	0.544772	-0.0496396	1.6945	-0.307733	P61513;C9J4Z3;Q6P4E4;E9PEL3;G5E9R3;M0R0A1;M0R2L6;A6NKH3	P61513;C9J4Z3;Q6P4E4;E9PEL3;G5E9R3;M0R0A1;M0R2L6	60S ribosomal protein L37a	RPL37A
0.109695	0.0443242	-0.00498587	0.598651	0.724912	0.814017			14	14	14	28.5	28.5	28.5	82.285	88.995	2952500000	1396600000	1555900000	0.570295	-0.0503223	1.9895	0.612527	P33992;B1AHB1;B1AHB2;B1AHA9	P33992;B1AHB1	DNA replication licensing factor MCM5;DNA helicase	MCM5
0.0517201	0.0139266	0.0788831	-0.111555	-0.134715	-0.227287			7	7	7	44.8	44.8	44.8	13.742	24.83	24837000000	12519000000	12318000000	0.956231	-0.0518234	1.73788	-0.257852	P62851	P62851	40S ribosomal protein S25	RPS25
0.231432	-0.0826064	-0.00737659	-0.000851479	0.283685	0.0776532			6	6	6	27.3	27.3	27.3	32.789	28.28	1037700000	532870000	504800000	0.198726	-0.0528502	0.0786842	0.0201622	Q13868;A3KFL2;Q13868-3;Q13868-2;A3KFL5;A3KFL1	Q13868;A3KFL2;Q13868-3;Q13868-2;A3KFL5;A3KFL1	Exosome complex component RRP4	EXOSC2
-0.0872122	0.0594937	0.166972	NaN	NaN	NaN			2	1	1	6.6	3.3	3.3	34.803	3.2435	302360000	144520000	157850000	0.265495	-0.053582	0	NaN	A6NHQ2	A6NHQ2	rRNA/tRNA 2-O-methyltransferase fibrillarin-like protein 1	FBLL1
0.0597706	0.0234683	0.0542234	-0.401768	-0.332735	-0.273919			15	15	15	71.9	71.9	71.9	21.863	244.28	29138000000	15300000000	13838000000	1.38947	-0.0541793	2.14876	-0.43614	P32969;D6RAN4;H0Y9V9;E7ESE0;H0Y9R4	P32969;D6RAN4;H0Y9V9;E7ESE0	60S ribosomal protein L9	RPL9
NaN	NaN	0.0441843	NaN	NaN	NaN			1	1	1	2.5	2.5	2.5	50.519	3.9851	90568000	35975000	54592000	0	-0.0558157	0	NaN	Q13325-2;Q13325	Q13325-2;Q13325	Interferon-induced protein with tetratricopeptide repeats 5	IFIT5
0.127369	0.0507454	-0.0503381	0.0973411	0.177344	-0.547067			11	11	11	16.8	16.8	16.8	87.081	24.185	751620000	385870000	365750000	0.419446	-0.0574078	0.30724	-0.190794	Q9Y446;Q9Y446-2;E9PKC4;E9PRW6;E9PJR7;E9PK71;E9PQ15	Q9Y446;Q9Y446-2	Plakophilin-3	PKP3
-0.394373	0.266037	0.251446	NaN	0.135535	-0.990452			2	2	2	7.5	7.5	7.5	78.863	22.396	214670000	122300000	92369000	0.0904764	-0.0589632	0.28338	-0.527459	O00566	O00566	U3 small nucleolar ribonucleoprotein protein MPP10	MPHOSPH10
0.124593	0.0113525	-0.0183957	-0.380634	-0.233278	-0.608518			9	9	8	60.5	60.5	60.5	14.203	94.042	12061000000	6257000000	5804500000	0.526591	-0.0608168	1.36371	-0.507477	P84103-2;P84103;A0A087X2D0	P84103-2;P84103;A0A087X2D0	Serine/arginine-rich splicing factor 3	SRSF3
0.0384361	NaN	NaN	NaN	NaN	NaN			2	2	2	30.3	30.3	30.3	8.5199	7.8295	257550000	131580000	125970000	0	-0.0615639	0	NaN	A0A087X1B7;X6R700;Q9Y3Y2-4;Q9Y3Y2;Q9Y3Y2-3	A0A087X1B7;X6R700;Q9Y3Y2-4;Q9Y3Y2;Q9Y3Y2-3	Chromatin target of PRMT1 protein	CHTOP
-0.180299	0.217975	0.0728604	NaN	NaN	NaN			5	5	5	7.2	7.2	7.2	104.93	8.0304	417150000	157090000	260060000	0.192645	-0.0631545	0	NaN	J3QK89;Q8IWX8	J3QK89;Q8IWX8	Calcium homeostasis endoplasmic reticulum protein	CHERP
0.00619029	0.0590784	0.0448837	-0.302422	-0.135237	-0.125431			12	12	12	58.2	58.2	58.2	24.205	131	35598000000	13714000000	21885000000	1.24351	-0.0632826	1.42462	-0.287697	P62241;Q5JR95	P62241;Q5JR95	40S ribosomal protein S8	RPS8
-0.0827897	-0.0907261	0.28238	-0.101056	-0.137918	-0.432474			6	6	6	30.6	30.6	30.6	27.924	26.237	501020000	284480000	216550000	0.182937	-0.0637118	1.04181	-0.323816	Q9NRX1;F8WBJ6	Q9NRX1;F8WBJ6	RNA-binding protein PNO1	PNO1
-0.266958	0.171079	0.202512	0.543892	0.081885	0.0775164			9	9	9	38.5	38.5	38.5	31.441	39.209	833430000	456990000	376440000	0.147548	-0.0644559	0.321882	0.134431	P19387;H3BRR2	P19387	DNA-directed RNA polymerase II subunit RPB3	POLR2C
0.095722	0.0593554	-0.0527453	0.166587	-0.141685	-0.0843949			5	5	5	21.1	21.1	21.1	27.571	28.718	880740000	432230000	448500000	0.555582	-0.0658893	0.477478	-0.119831	H0Y9X1;Q96EY4;D6RA57;D6RE67;D6RC31	H0Y9X1;Q96EY4;D6RA57	Translation machinery-associated protein 16	TMA16
0.033793	NaN	NaN	NaN	NaN	NaN			4	3	3	14.6	11.6	11.6	51.78	4.6581	107230000	67074000	40151000	0	-0.066207	0	NaN	Q6PCB7-2;Q6PCB7;M0QZC9	Q6PCB7-2;Q6PCB7	Long-chain fatty acid transport protein 1	SLC27A1
-0.140937	0.261591	-0.0227127	-0.124912	-0.35124	-0.40855			4	4	4	14.1	14.1	14.1	37.898	16.59	948070000	527690000	420380000	0.200903	-0.0673529	1.34806	-0.394901	C9JP00;A0A0A0MQX8;Q9NR56;Q9NR56-3;Q9NR56-4;Q9NR56-7;Q9NR56-6;Q9NR56-2;Q9NR56-5;O95205;H7C4T5;Q5VZF2-3;Q5VZF2-2;Q5VZF2;B1AKI6;Q86VM6;Q9NUK0-2;Q9NUK0	C9JP00;A0A0A0MQX8;Q9NR56;Q9NR56-3;Q9NR56-4;Q9NR56-7;Q9NR56-6;Q9NR56-2;Q9NR56-5;O95205;H7C4T5;Q5VZF2-3;Q5VZF2-2;Q5VZF2	Muscleblind-like protein 1;Muscleblind-like protein 2	MBNL1;MBLL;MBNL2
0.032242	0.00561564	0.0564447	-0.094341	-0.114847	-0.202804			19	19	19	63.8	63.8	63.8	17.718	94.774	115590000000	58373000000	57220000000	1.36751	-0.0685659	1.71924	-0.237331	P62269;A0A0G2JQH2;Q5GGW2;J3JS69	P62269	40S ribosomal protein S18	RPS18
-0.0169499	-0.0495166	0.156655	0.533763	0.413919	0.427392			22	22	21	36.4	36.4	35.2	81.312	110.84	5339500000	2411700000	2927800000	0.410599	-0.069937	1.95851	0.358358	Q99661;Q99661-2;Q5JR91;Q5JR89;H0Y5Z9;Q8N4N8	Q99661;Q99661-2;Q5JR91	Kinesin-like protein KIF2C;Kinesin-like protein	KIF2C
0.015212	0.0374524	0.0350608	0.0214797	-0.179629	-0.113411			19	19	17	37.7	37.7	35	68.326	117.93	13476000000	6835000000	6641500000	2.00974	-0.0707582	1.07352	-0.19052	B4DXZ6;P51114;P51114-2;E9PFF5;P51114-3;E7EU85;C9JZE0;C9JY20;C9JAJ4;H7C4S4;C9IZ22	B4DXZ6;P51114;P51114-2;E9PFF5;P51114-3;E7EU85	Fragile X mental retardation syndrome-related protein 1	FXR1
0.0353423	0.0229004	NaN	NaN	NaN	NaN			4	4	4	8.5	8.5	8.5	91.809	8.1409	170960000	80193000	90771000	1.25389	-0.0708786	0	NaN	Q2NL82;I3L1Q5;I3L4E8	Q2NL82;I3L1Q5	Pre-rRNA-processing protein TSR1 homolog	TSR1
0.0304067	0.0305479	0.0238941	0.774418	0.125916	0.448795	+		7	7	7	42.1	42.1	42.1	17.853	19.786	778060000	359260000	418800000	3.02907	-0.0717171	0.693126	0.34971	Q8N983-4;H0Y6Y8;B1AL05;Q8N983-3;Q8N983-2;Q8N983;Q8N983-6;Q8N983-7;H0YBU8;M0R051	Q8N983-4;H0Y6Y8;B1AL05;Q8N983-3;Q8N983-2;Q8N983;Q8N983-6;Q8N983-7;H0YBU8	39S ribosomal protein L43, mitochondrial	MRPL43
NaN	0.0278618	NaN	NaN	NaN	-0.116927			3	3	3	20.5	20.5	20.5	22.826	9.4188	94284000	59082000	35202000	0	-0.0721382	0	-0.216927	Q9NRW3	Q9NRW3	DNA dC->dU-editing enzyme APOBEC-3C	APOBEC3C
0.0652966	-0.158413	0.174662	0.00288247	-0.256511	-0.196624			7	7	7	19.5	19.5	19.5	38.388	35.48	1743000000	1021100000	721920000	0.271679	-0.0728182	1.0663	-0.250084	P20042	P20042	Eukaryotic translation initiation factor 2 subunit 2	EIF2S2
0.0258793	NaN	NaN	NaN	NaN	NaN			1	1	1	10.9	10.9	10.9	15.324	4.1893	51484000	24810000	26674000	0	-0.0741207	0	NaN	C9JYM0;O75817	C9JYM0;O75817	Ribonuclease P protein subunit p20	POP7
-0.149409	-0.0806218	0.303225	0.0842003	0.0766959	0.489337			12	12	12	8.1	8.1	8.1	231.43	41.048	756990000	381400000	375590000	0.190378	-0.0756017	0.316962	0.116745	O14578;O14578-4;H7BYJ3;O14578-3;O14578-2;F5H4K4	O14578;O14578-4;H7BYJ3;O14578-3	Citron Rho-interacting kinase	CIT
-0.0380211	0.0851526	NaN	NaN	0.0855606	0.434775			6	6	6	15.2	15.2	15.2	81.727	20.969	172030000	66920000	105110000	0.364738	-0.0764342	0.277826	0.160168	Q9HCM4-3;Q9HCM4;Q9HCM4-4;Q9HCM4-2;Q9H329-2;Q9H329	Q9HCM4-3;Q9HCM4;Q9HCM4-4;Q9HCM4-2	Band 4.1-like protein 5	EPB41L5
-0.173059	0.120617	0.119555	-0.102434	0.273934	0.197236			4	4	4	20.7	20.7	20.7	45.469	75.976	1484400000	771650000	712780000	0.29223	-0.0776287	0.0653537	0.0229119	P36383;Q5H9P2;K7ENT9;K7EQ14;K7EM78;K7ERH3	P36383;Q5H9P2	Gap junction gamma-1 protein	GJC1;DKFZp686P0738
[truncated: 513 more rows]

## Sheet: table legend
Column	Description
log2 Ratio H (RTN) / L (HA-empty vector control) normalized RTN_01	Ratio of immunoprecipitated proteins between heavy labeled RTN3 and light HA-empty vector control
[truncated: 19 more rows]
