# Supplementary material for: Full length RTN3 regulates turnover of tubular endoplasmic reticulum via selective autophagy
Source: eLife journal article supplement (doi:10.7554/elife.25555), 2017-06-15
Supplement: supp [file elife-25555-supp-v1.zip]

A

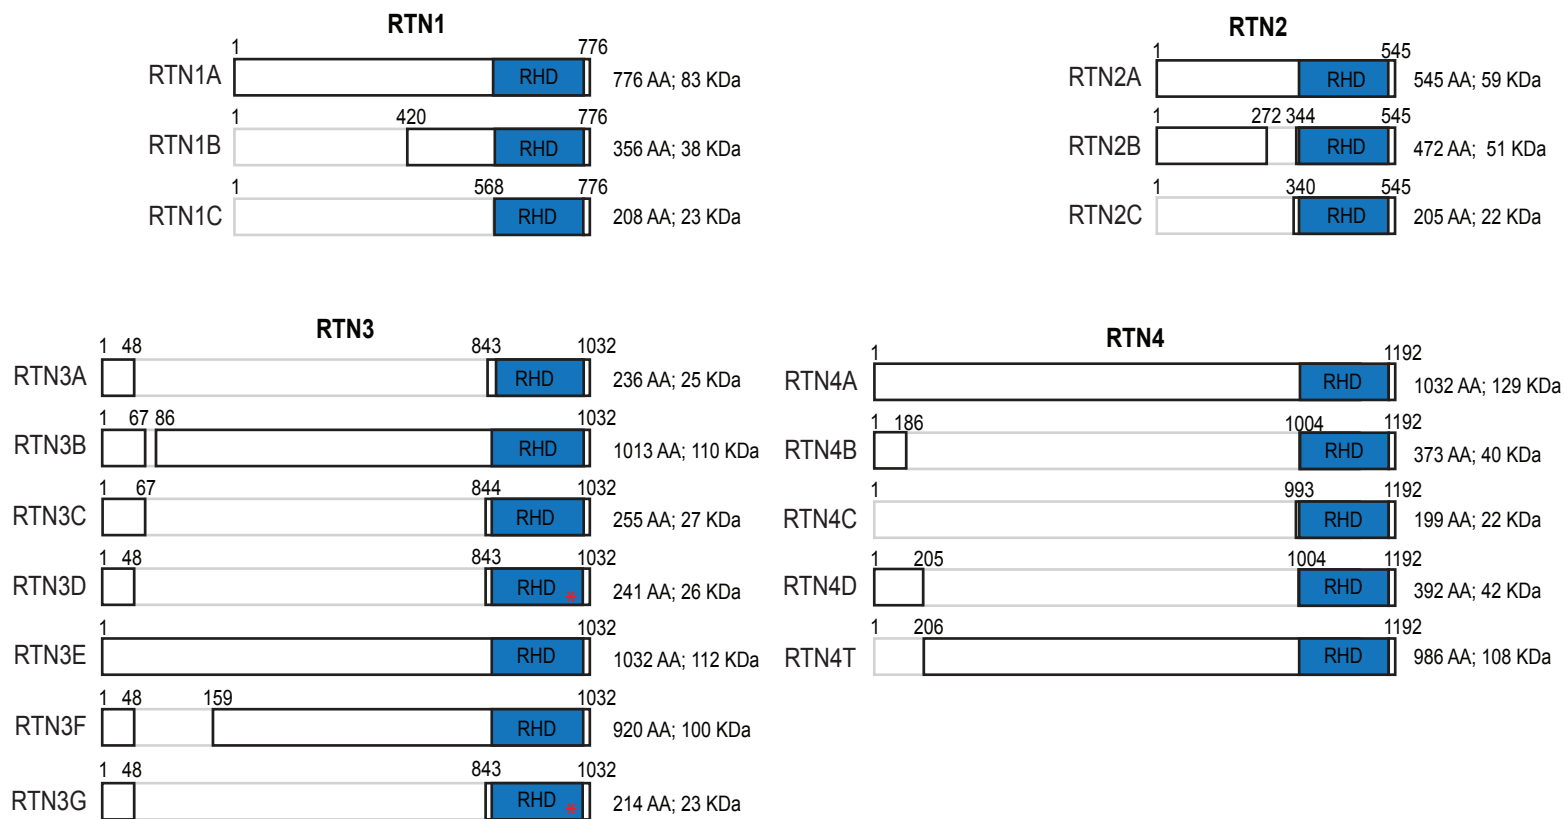

B

| PubMed annotation            | RefSeqs     | Isoform Length | Re-named in the text |
|------------------------------|-------------|----------------|----------------------|
| Reticulon1 isoform A (RTN1A) | NM_021136.2 | Long           | RTN1L                |
| Reticulon1 isoform C (RTN1C) | NM_206852.2 | Short          | RTN1S                |
| Reticulon2 isoform A (RTN2A) | NM_005619.4 | Long           | RTN2L                |
| Reticulon2 isoform C (RTN2C) | NM_206901.2 | Short          | RTN2S                |
| Reticulon3 isoform B (RTN3B) | NM_201428.2 | Long           | RTN3L                |
| Reticulon3 isoform A (RTN3A) | NM_006054.3 | Short          | RTN3S                |
| Reticulon4 isoform A (RTN4A) | NM_020532.4 | Long           | RTN4L                |
| Reticulon4 isoform C (RTN4C) | NM_007008.2 | Short          | RTN4S                |

C

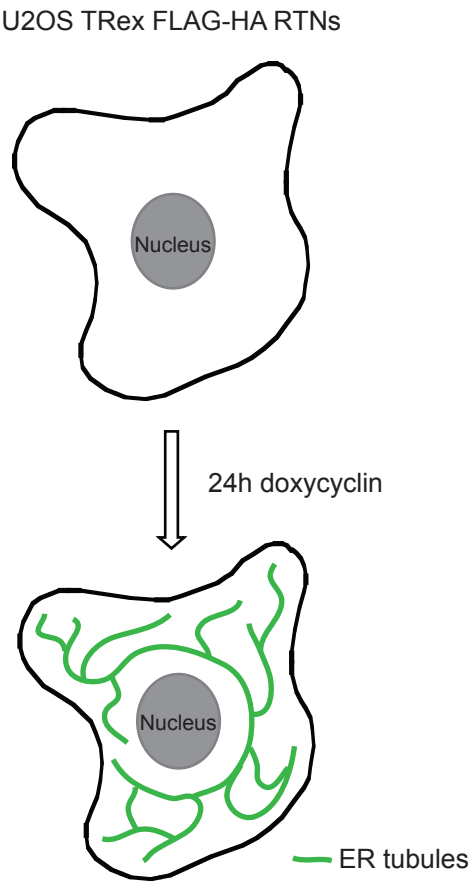

Figure 1 - figure supplement 1
