# Supplementary material for: Full length RTN3 regulates turnover of tubular endoplasmic reticulum via selective autophagy
Source: eLife journal article supplement (doi:10.7554/elife.25555), 2017-06-15
Supplement: supp [file elife-25555-supp-v1.zip]

A

EBSS 1h + Rapalog + Baf.A1

HA

FLAG

LAMP1

MERGE

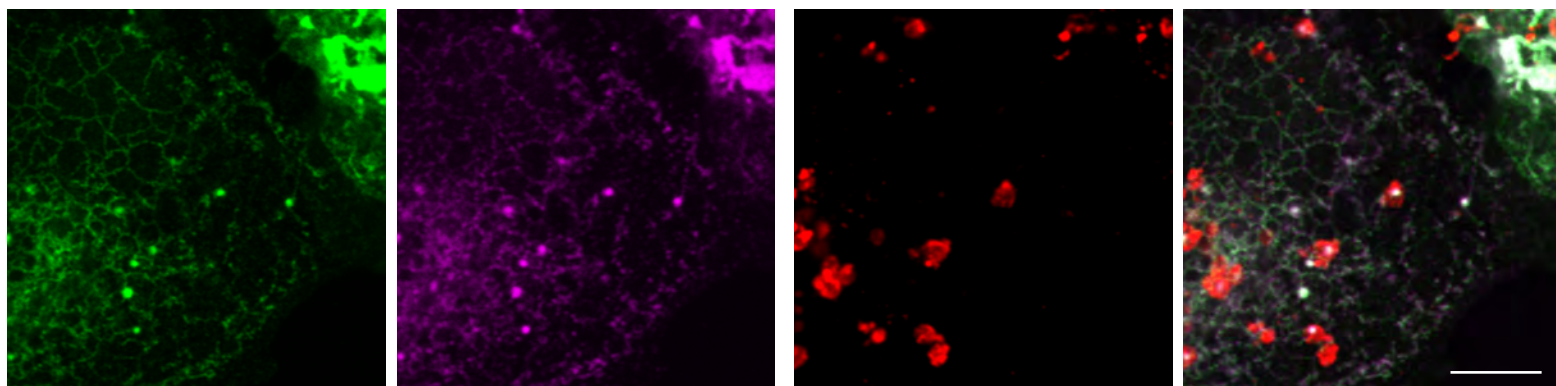

FKBP-HA-RTN3L

FBP-FLAG-RTN3L

B

HA

LAMP1

Merge

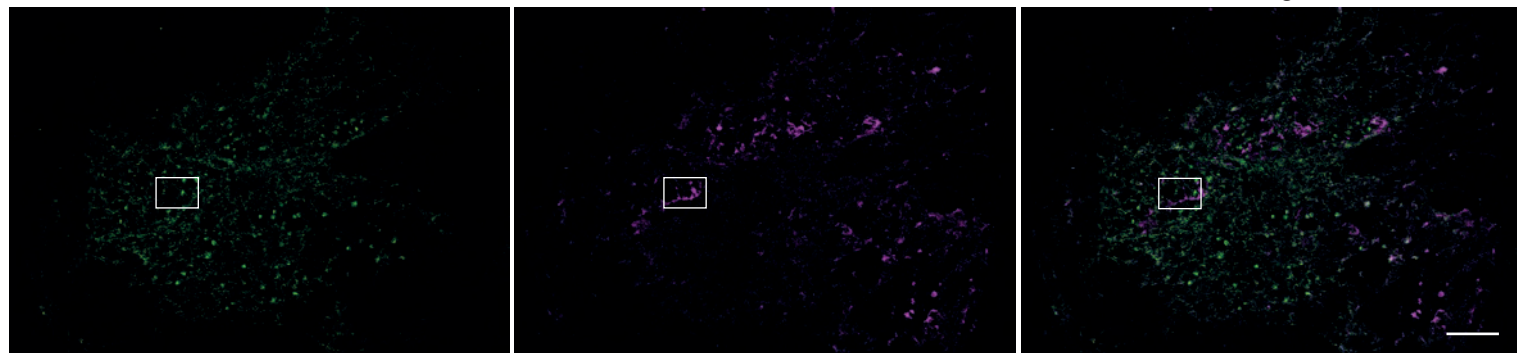

EBSS 6h + Bafilomycin A1

C

RTN3L-mCherry-EGFP

EGFP

mCherry

Merge

Basal

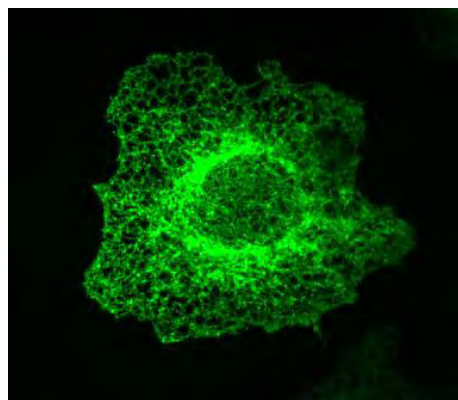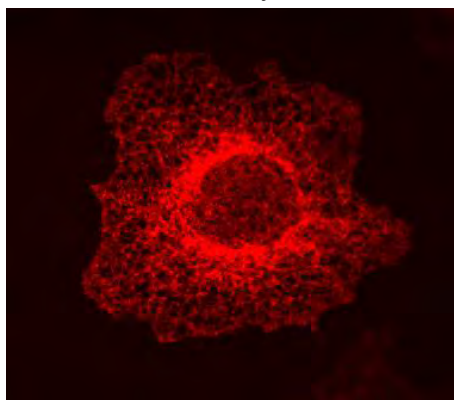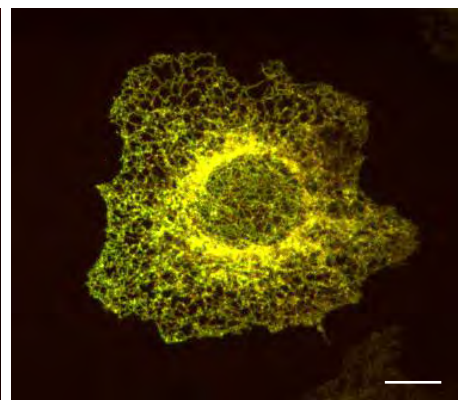

EBSS 6h

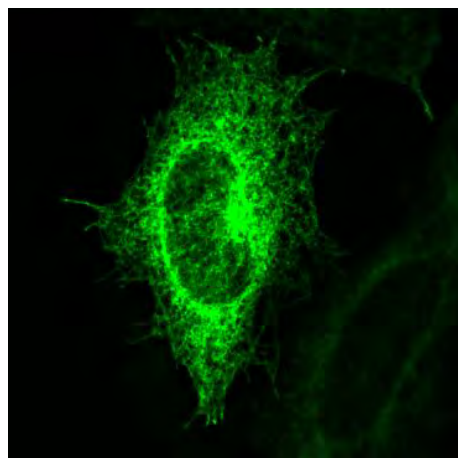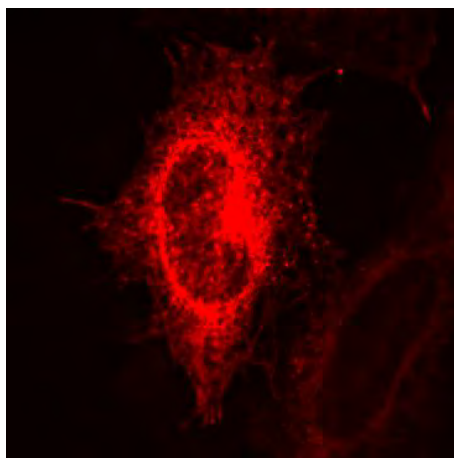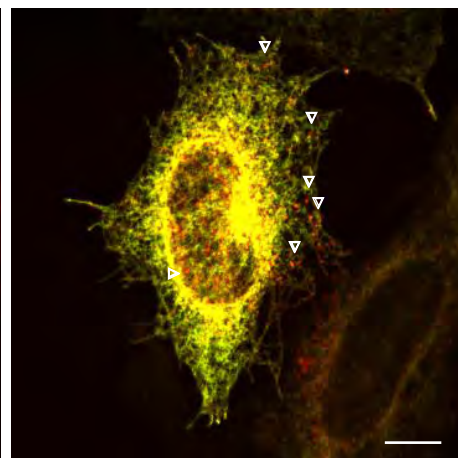

Figure 3 - figure supplement 4
