# Supplementary figures and images for: Full length RTN3 regulates turnover of tubular endoplasmic reticulum via selective autophagy
Source: eLife journal article supplement (doi:10.7554/elife.25555), 2017-06-15

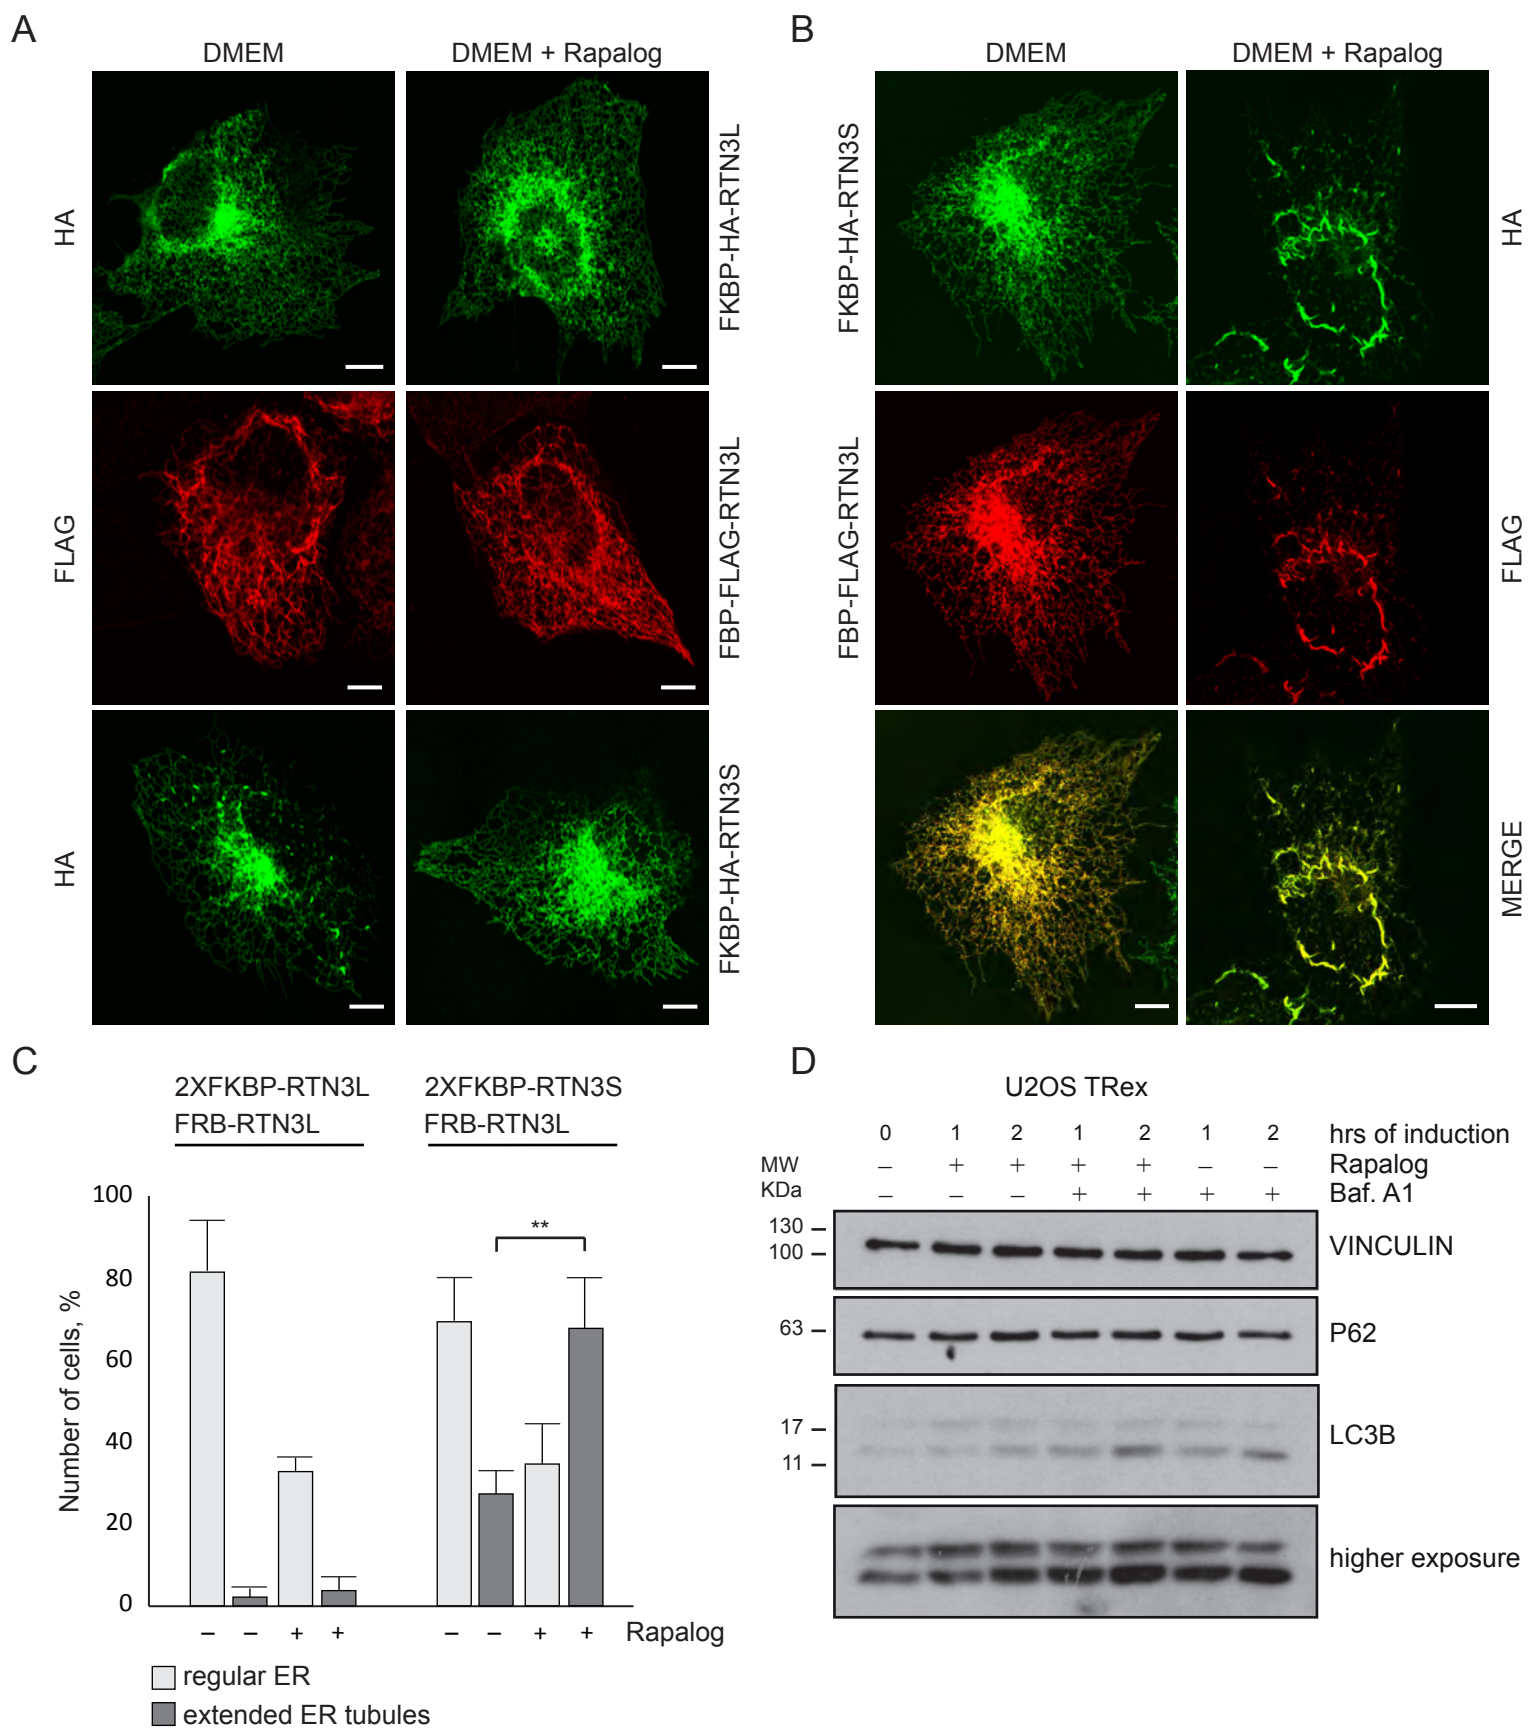

Figure 2 - figure supplement 1

Supplement: supp [file elife-25555-supp-v1.zip]

A

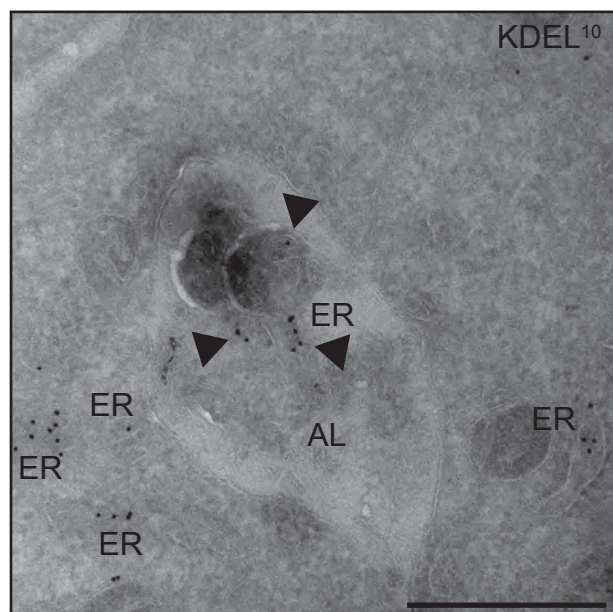

B

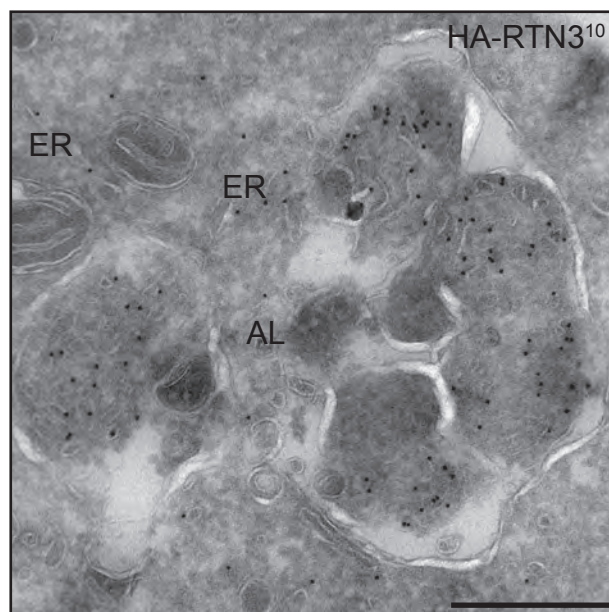

C

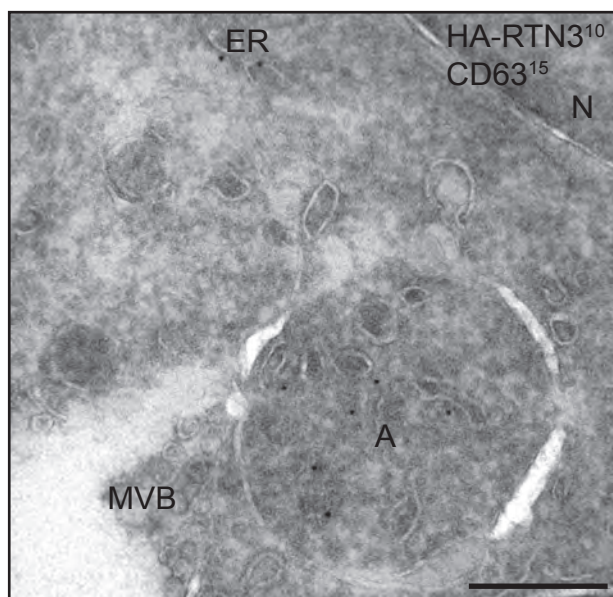

Supplement: supp [file elife-25555-supp-v1.zip]

A

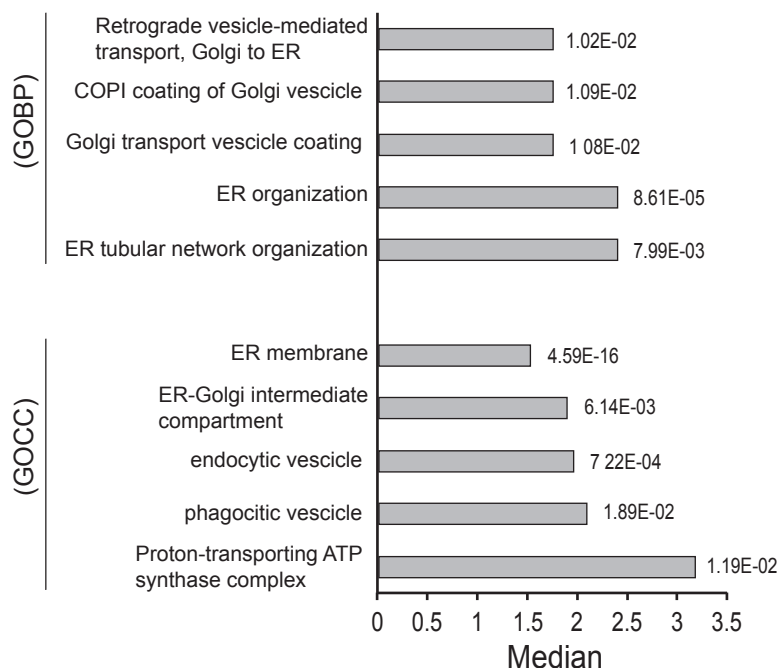

B

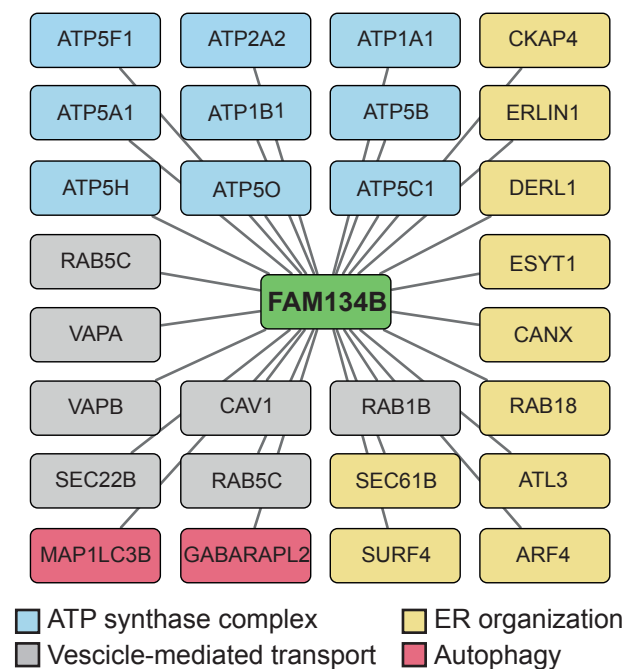

C

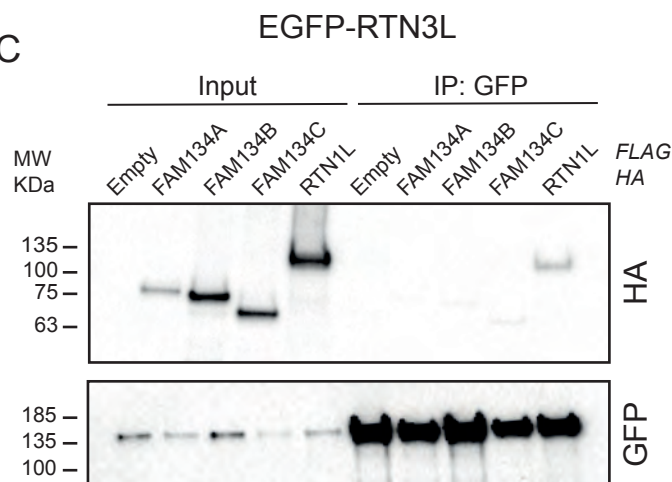

E

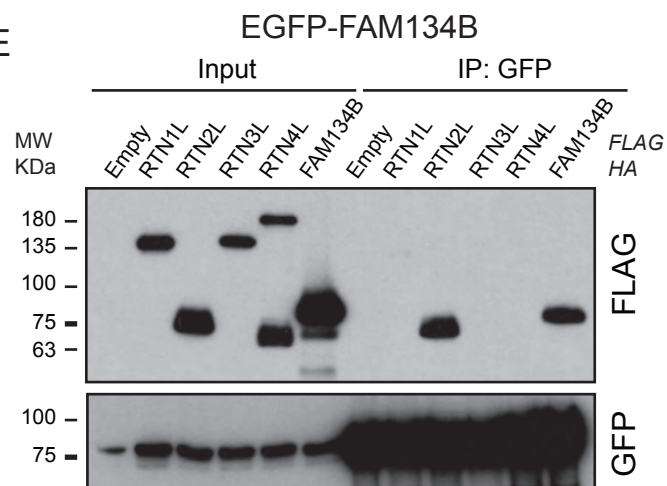

D

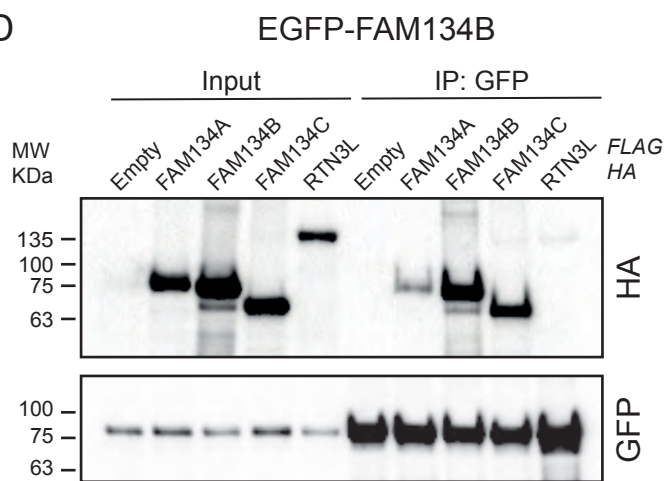

F

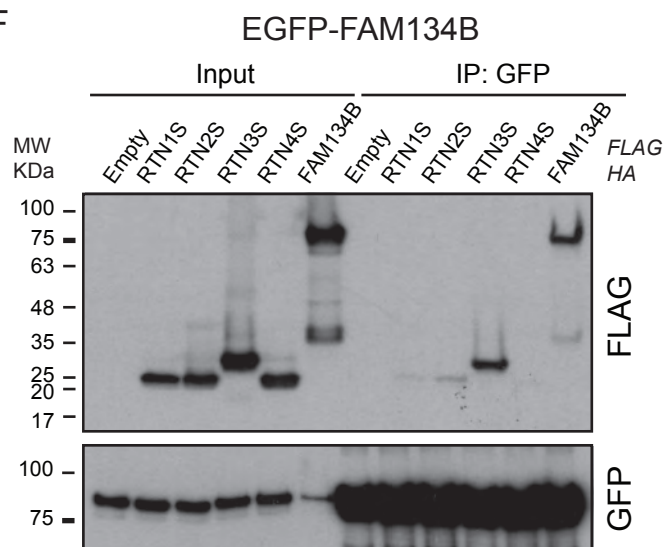

Figure 8 - figure supplement 1

Supplement: supp [file elife-25555-supp-v1.zip]

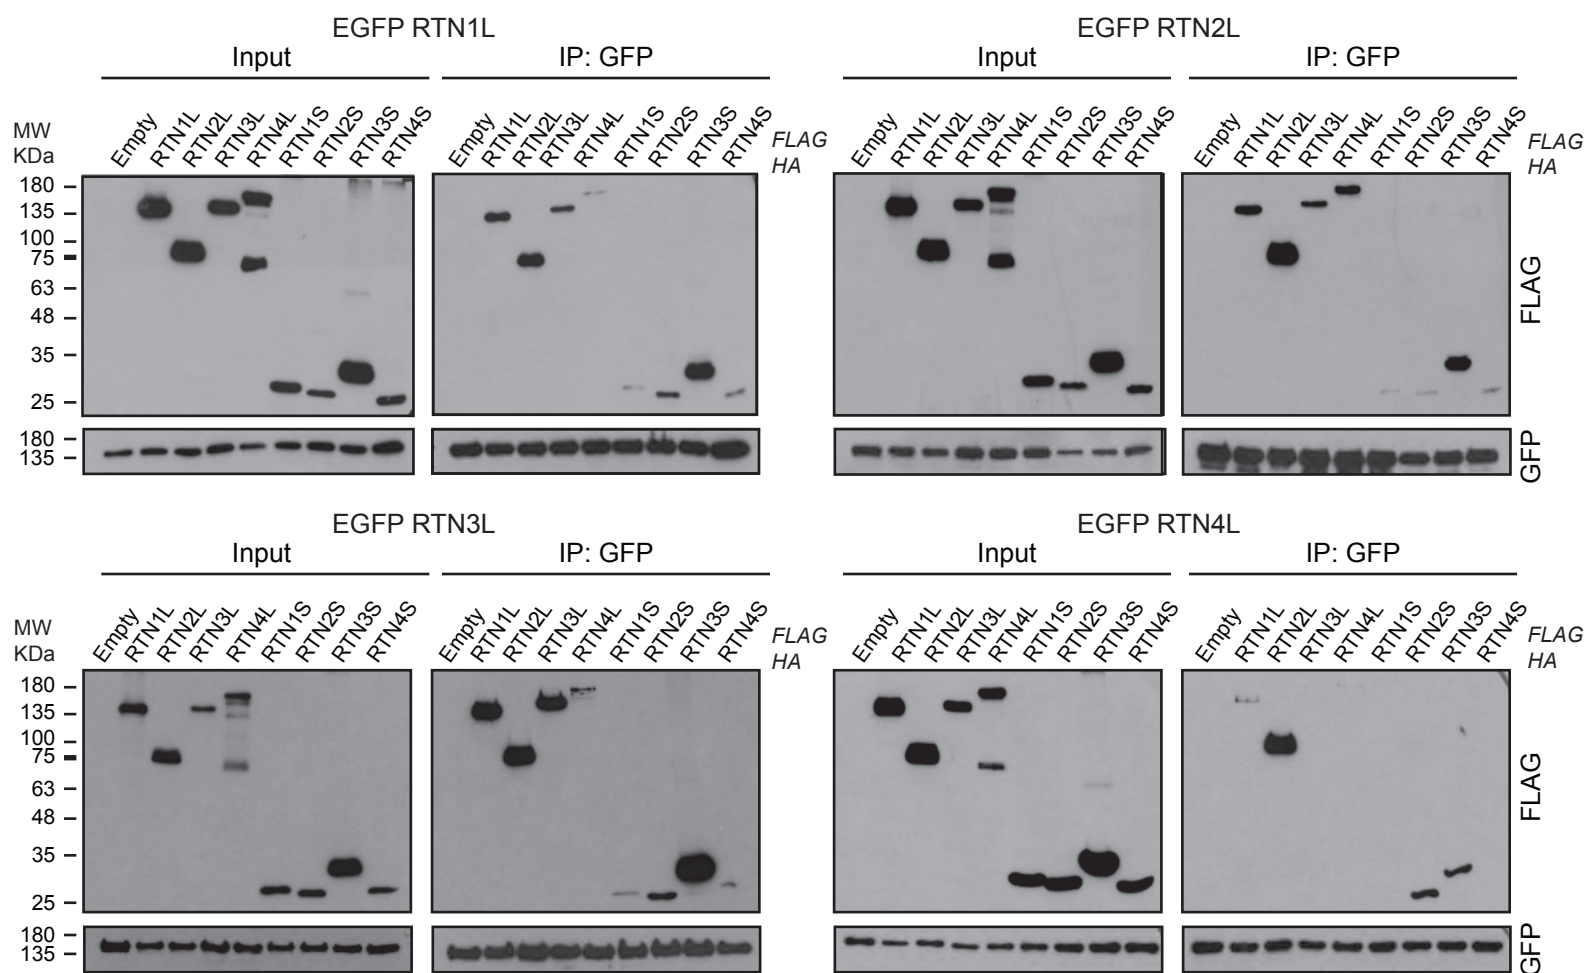

Figure 5 - figure supplement 3

Supplement: supp [file elife-25555-supp-v1.zip]

A

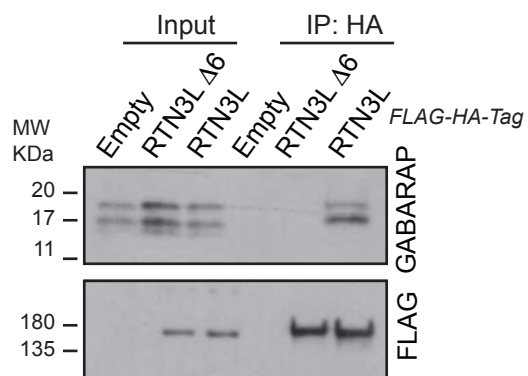

B

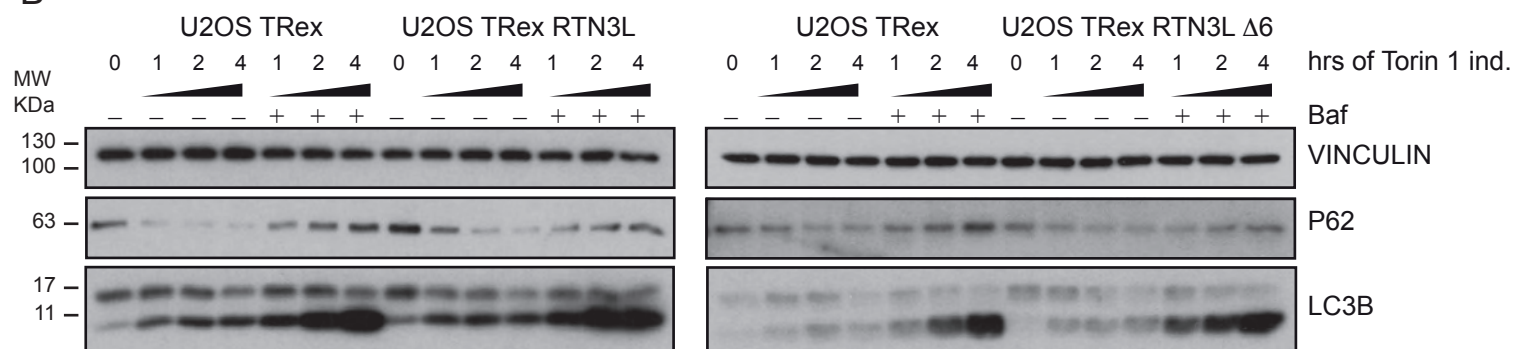

C

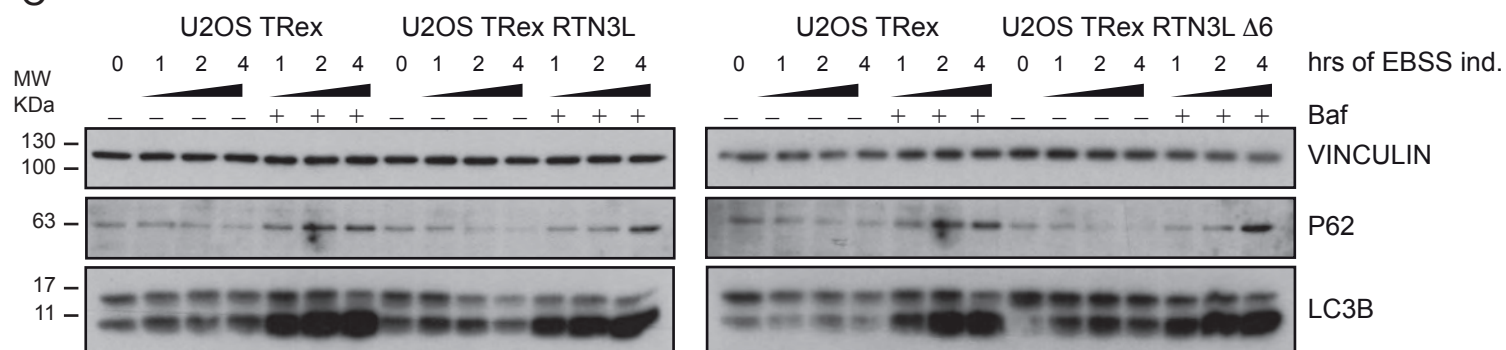

Figure 6 - figure supplement 3

Supplement: supp [file elife-25555-supp-v1.zip]

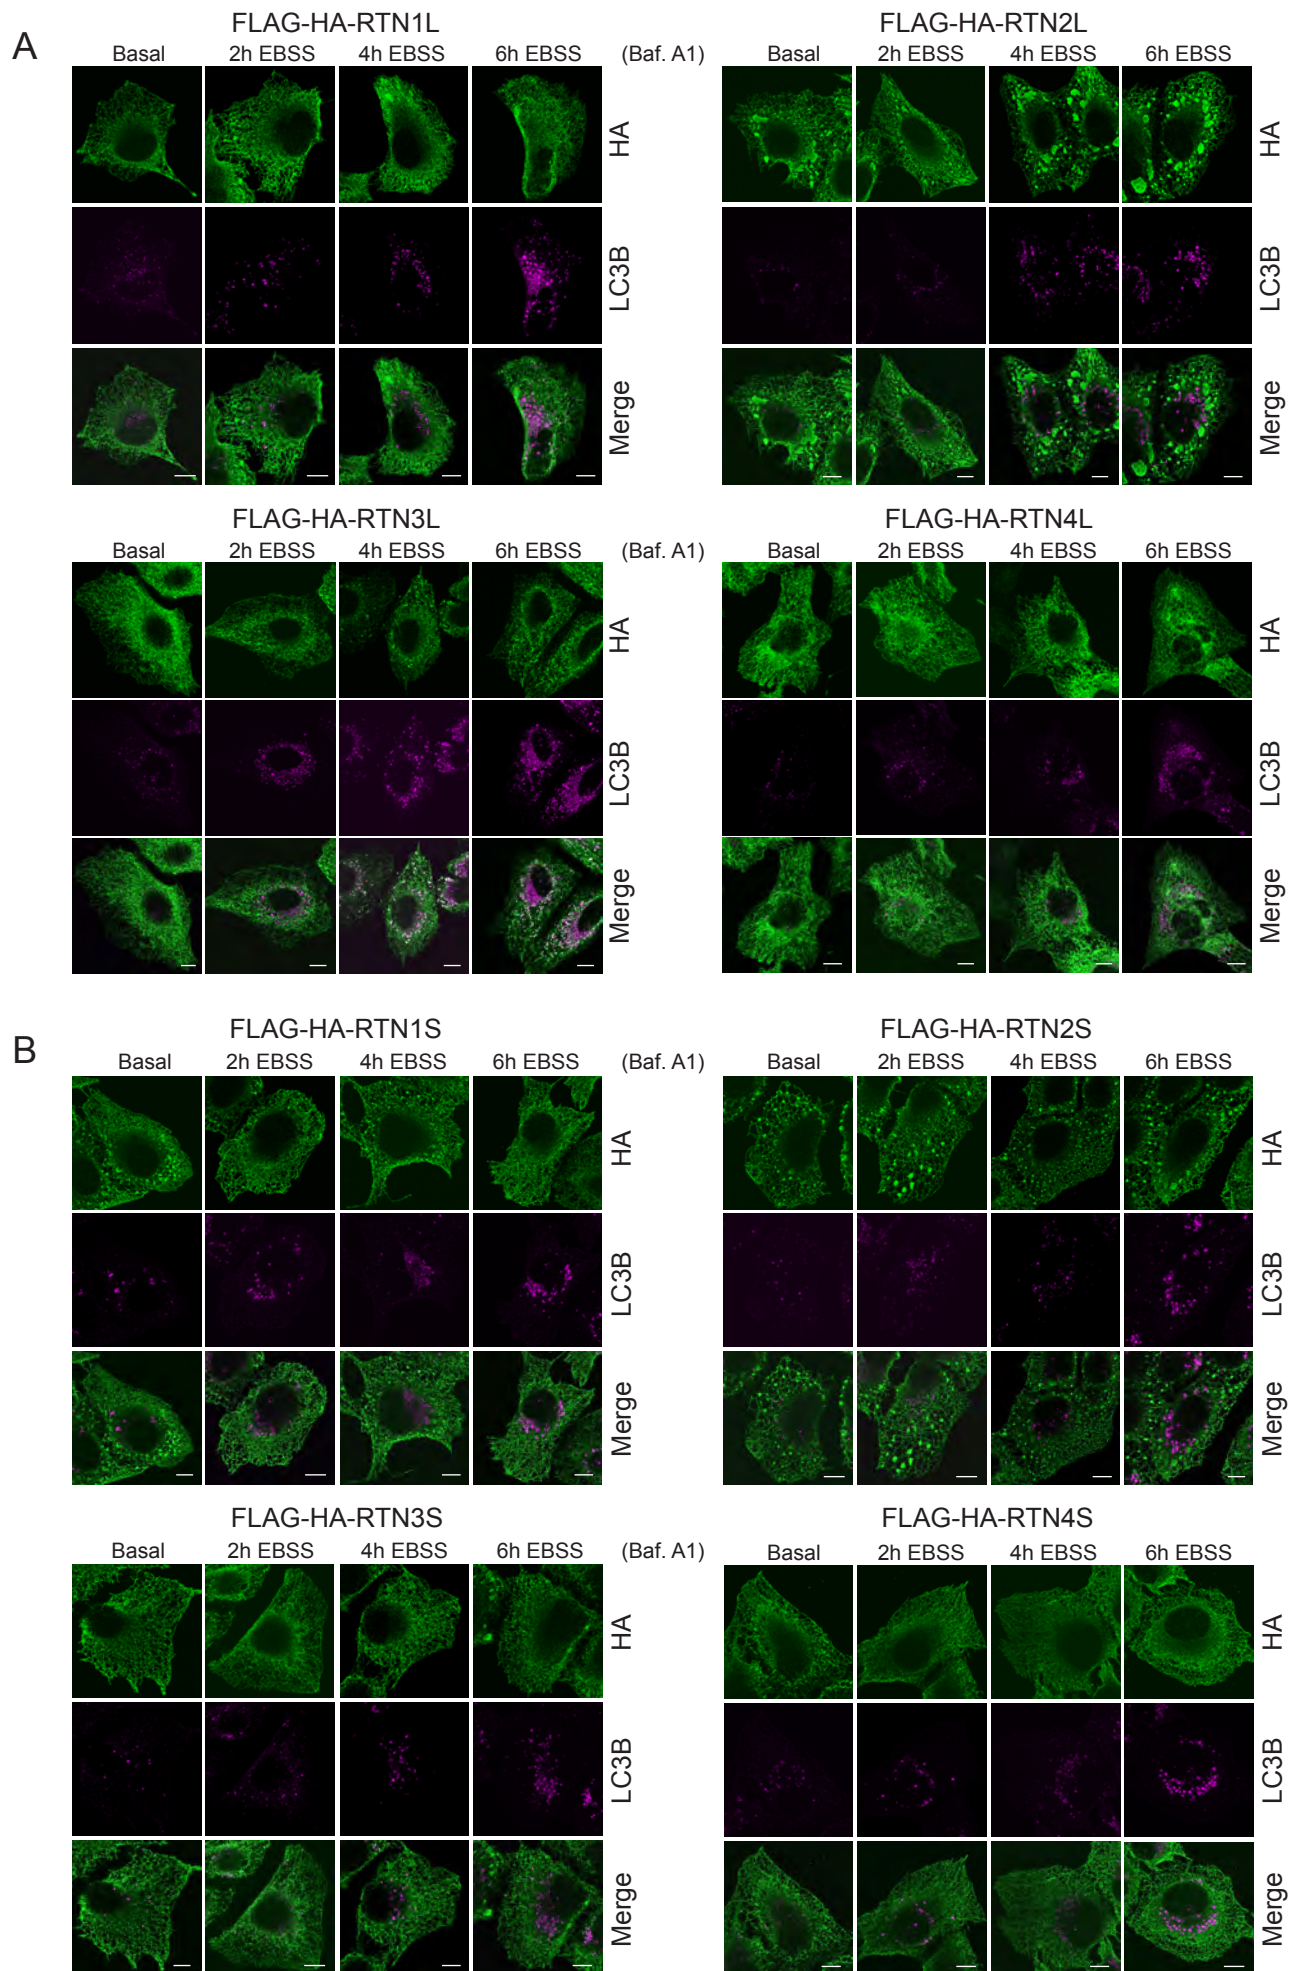

Figure 1 - figure supplement 4

Supplement: supp [file elife-25555-supp-v1.zip]

A

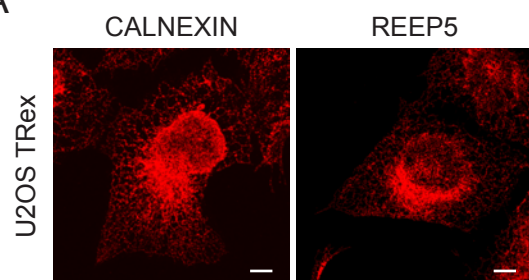

B

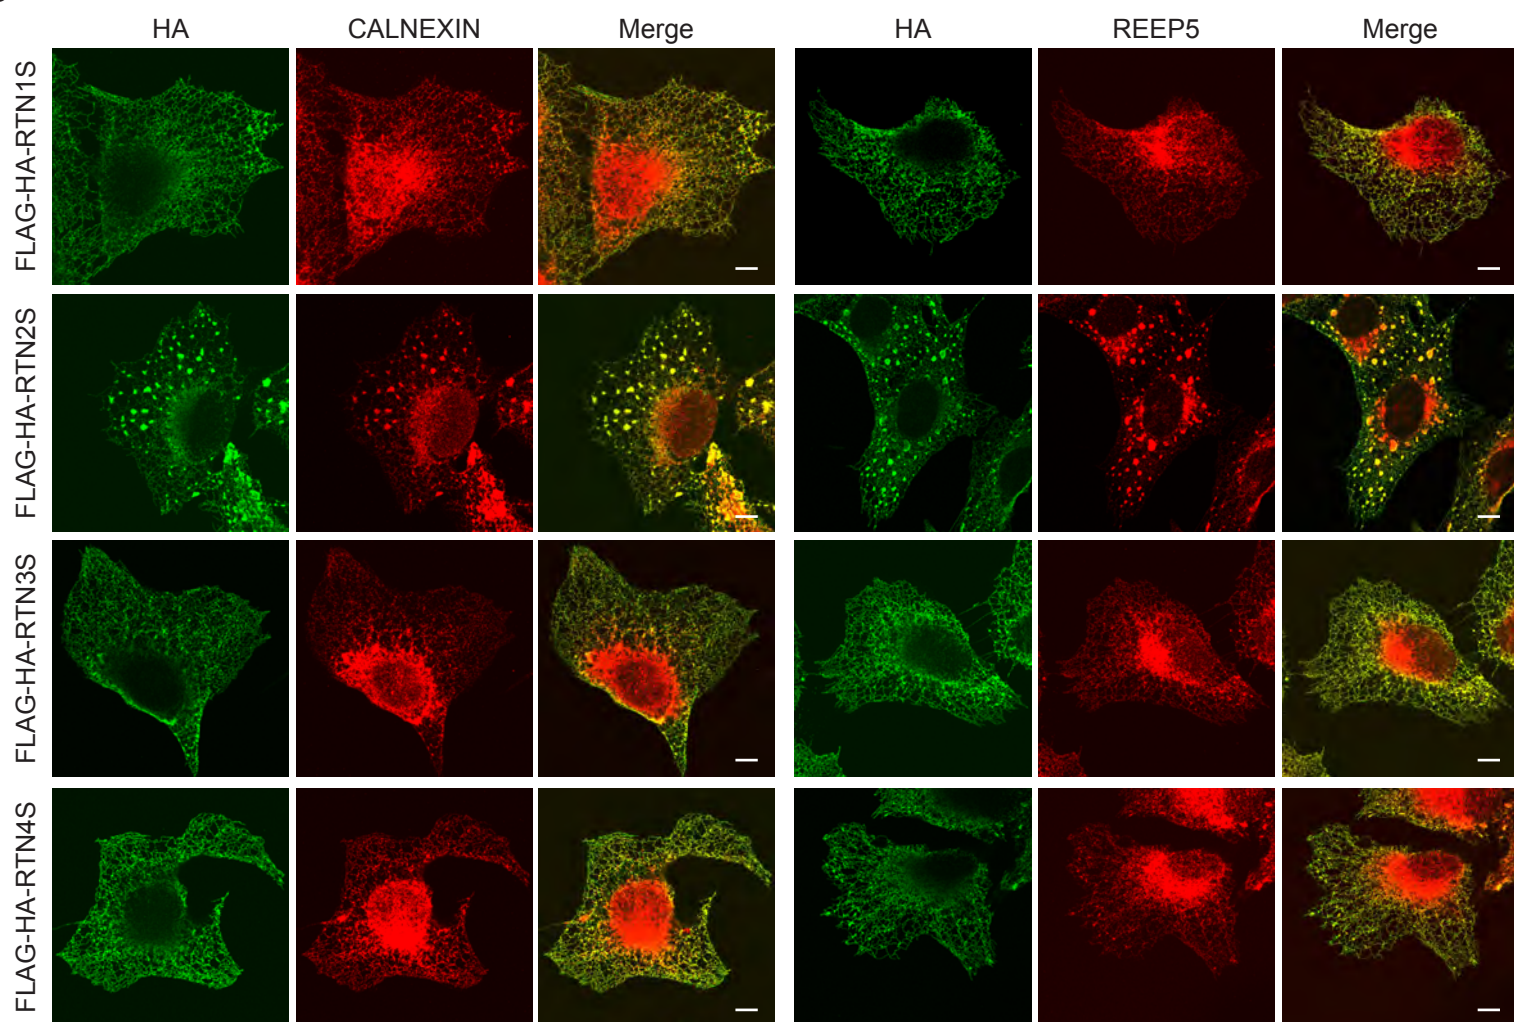

Figure 1 - figure supplement 3

Supplement: supp [file elife-25555-supp-v1.zip]

U2OS TRex FLAG-HA-RTN3L EBSS 6h + Baf.A1

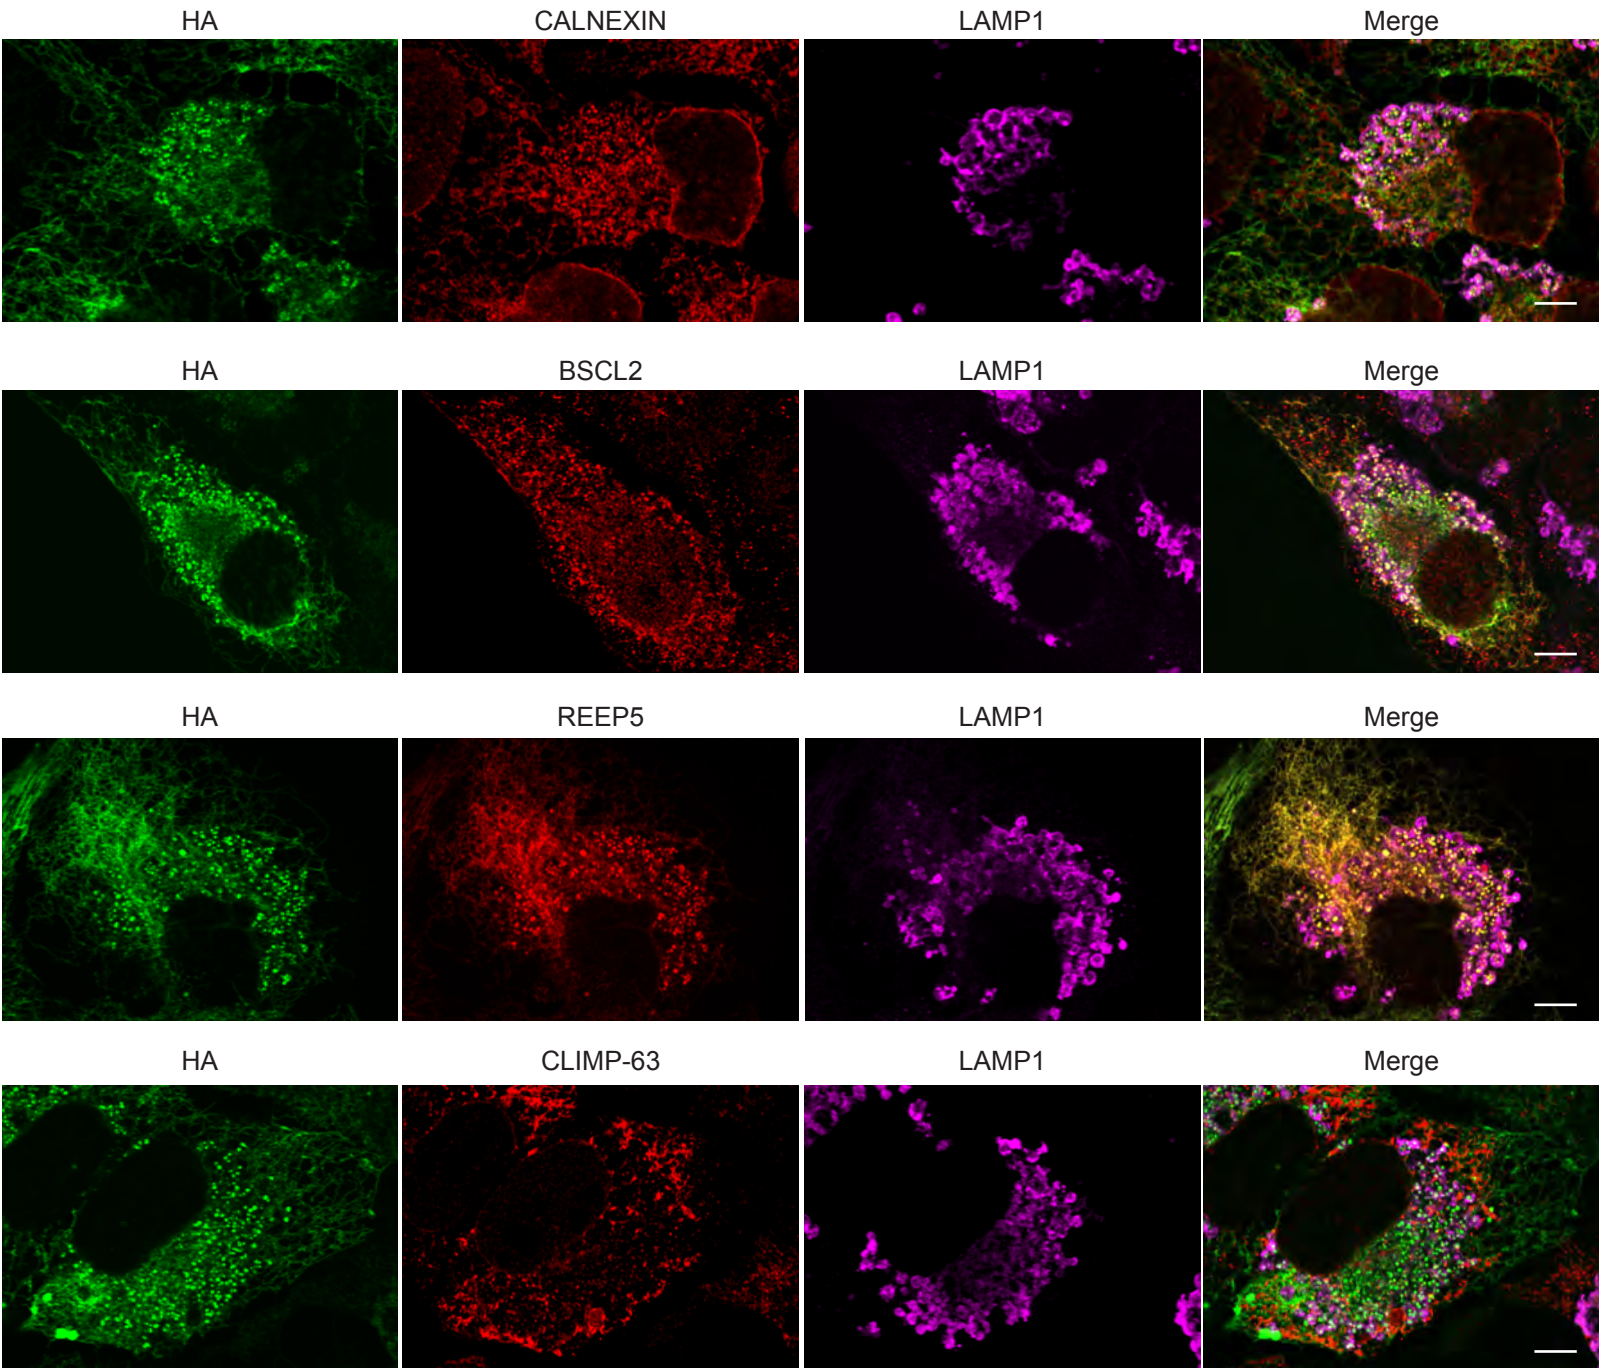

Figure 3 - figure supplement 3

Supplement: supp [file elife-25555-supp-v1.zip]

A

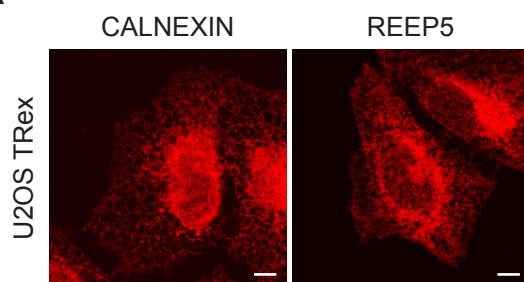

B

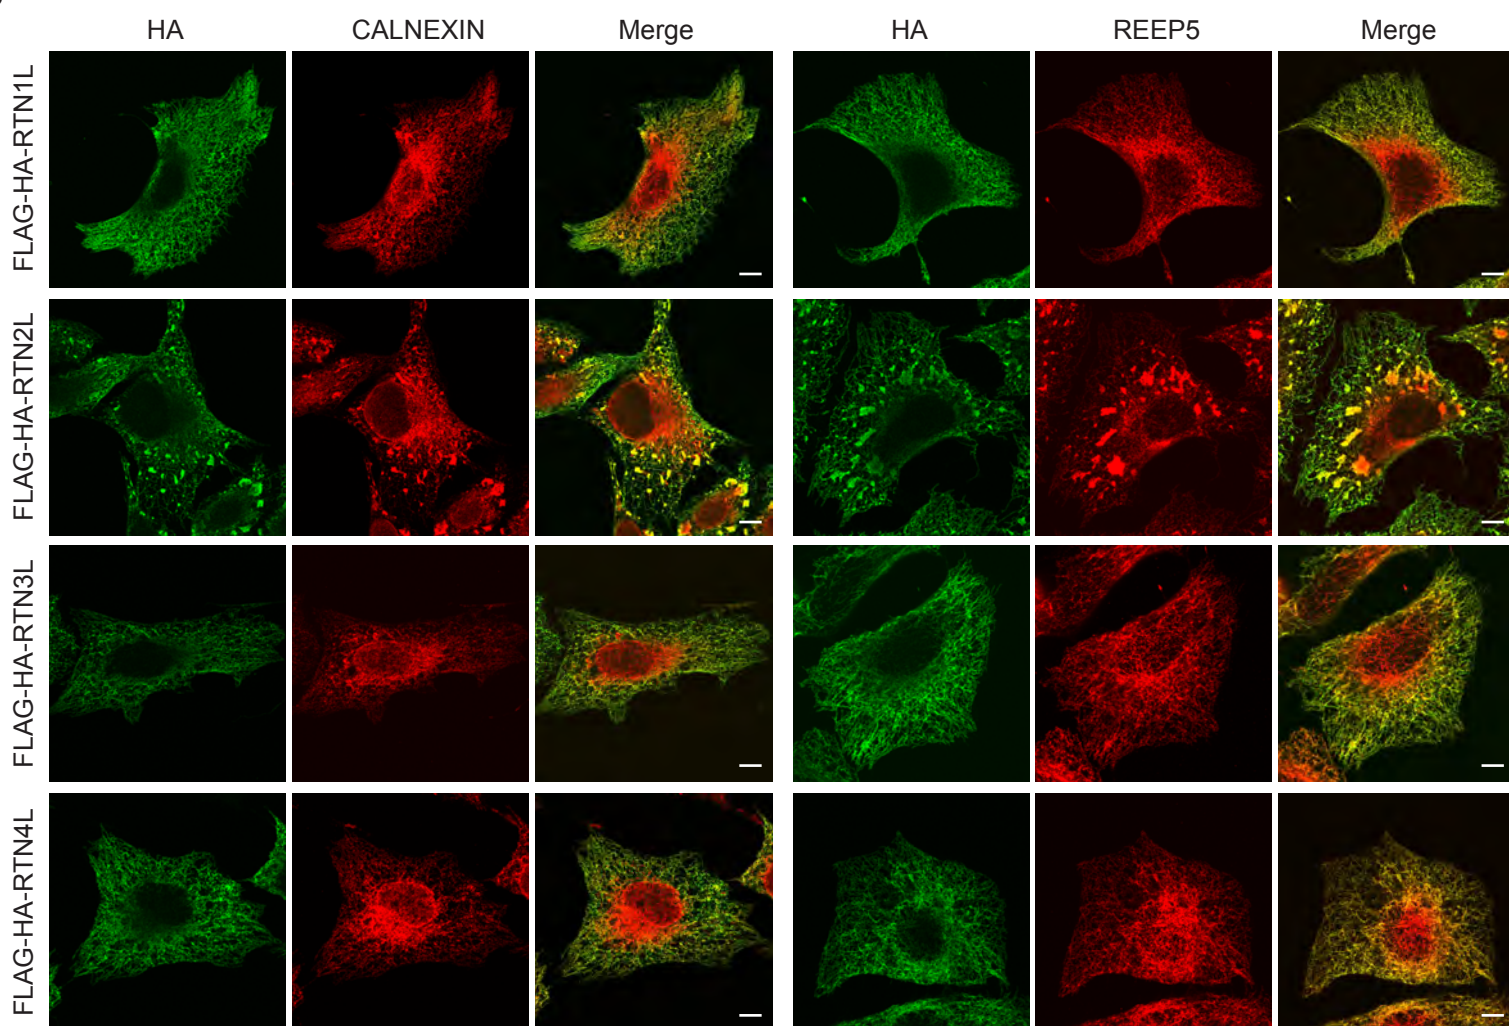

Figure 1 - figure supplement 2

Supplement: supp [file elife-25555-supp-v1.zip]

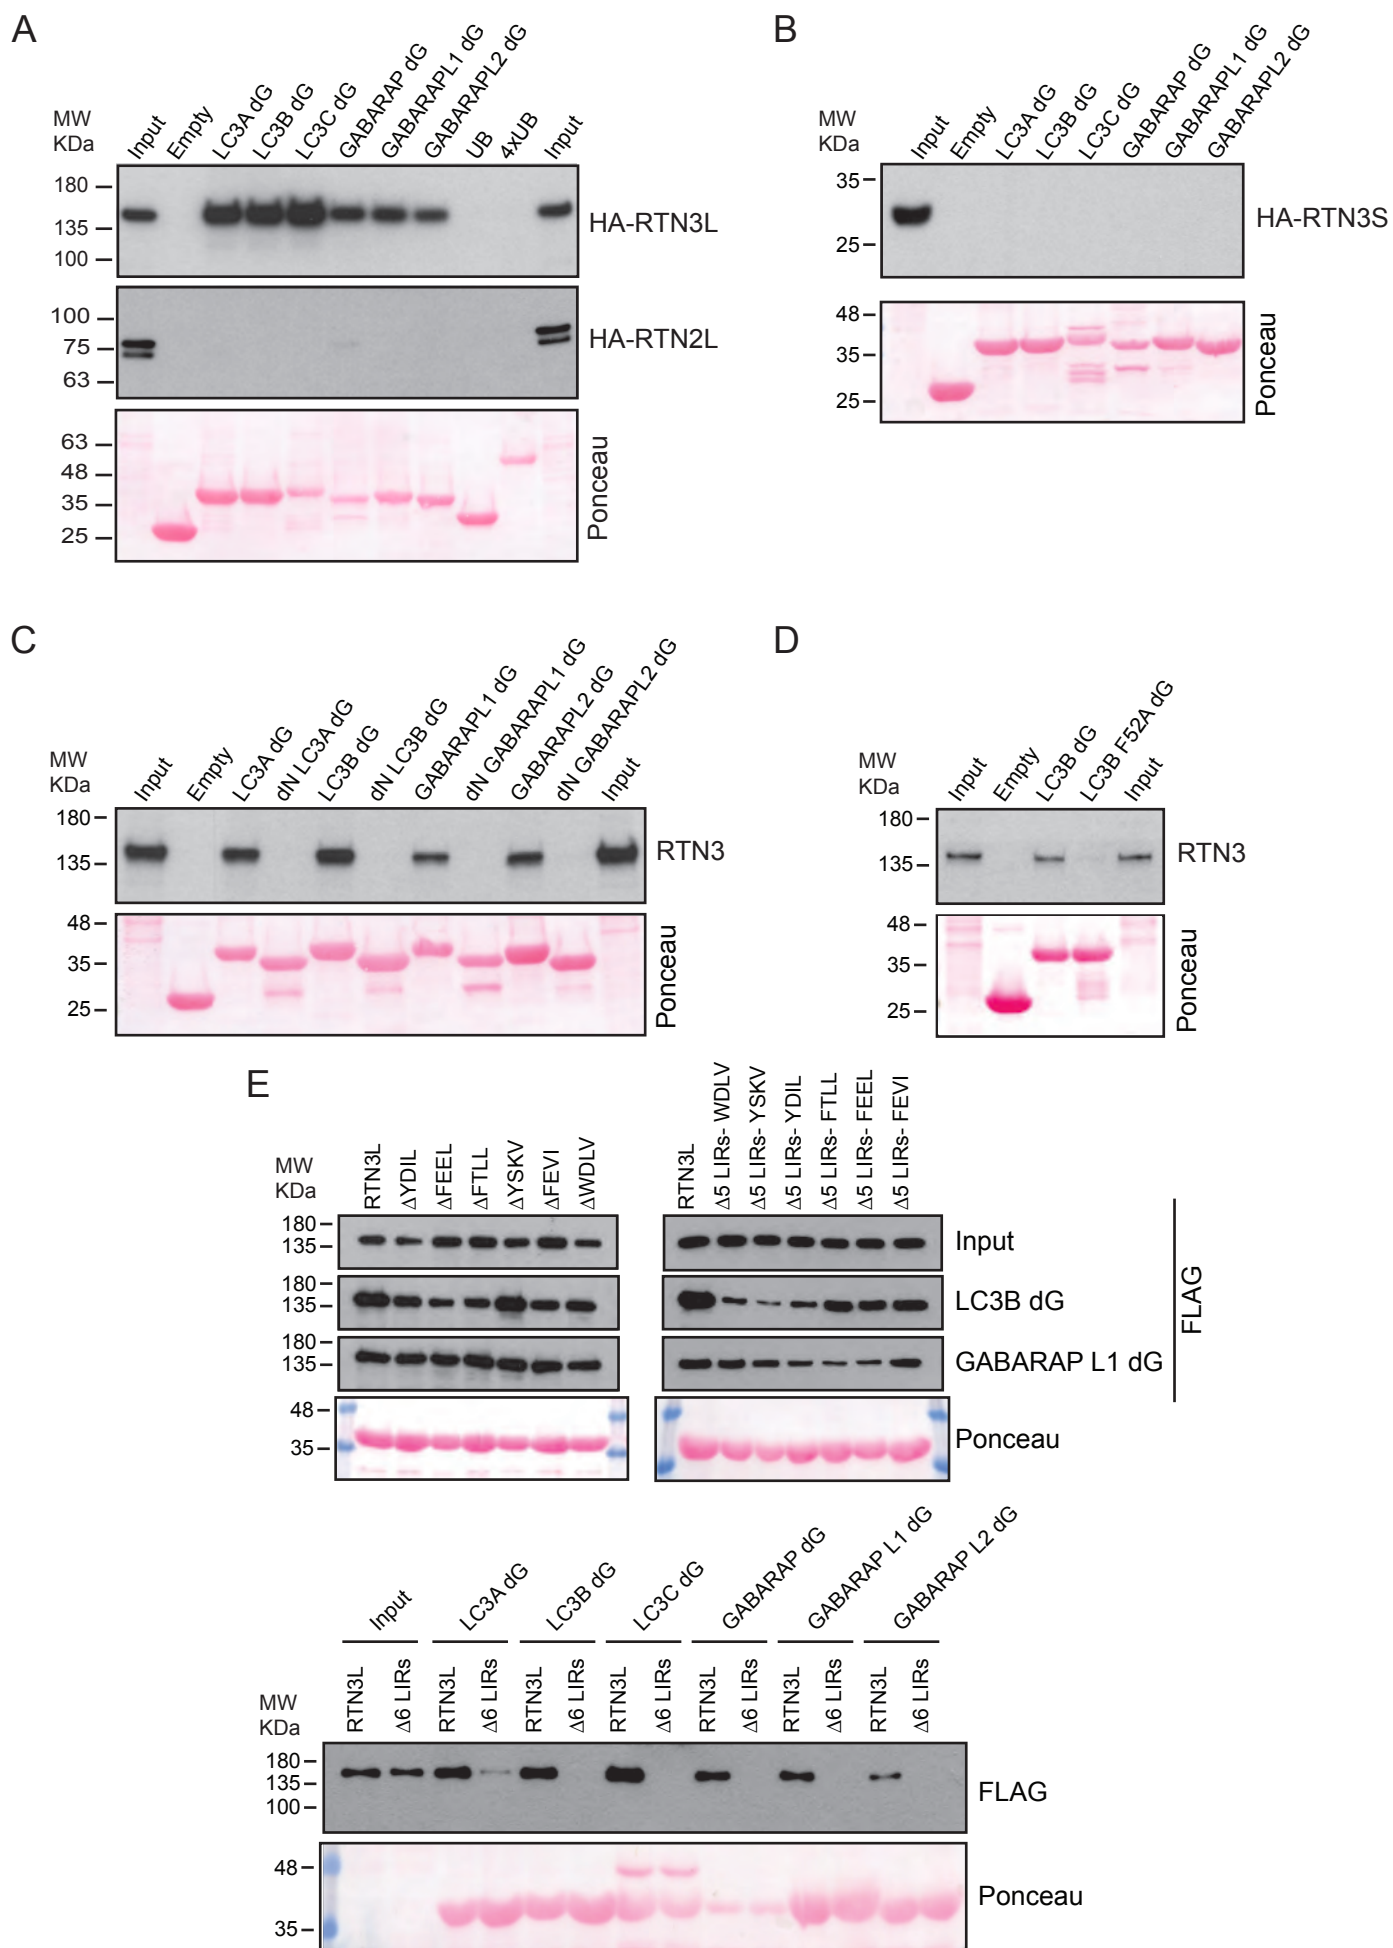

Figure 6 - figure supplement 1

Supplement: supp [file elife-25555-supp-v1.zip]

A

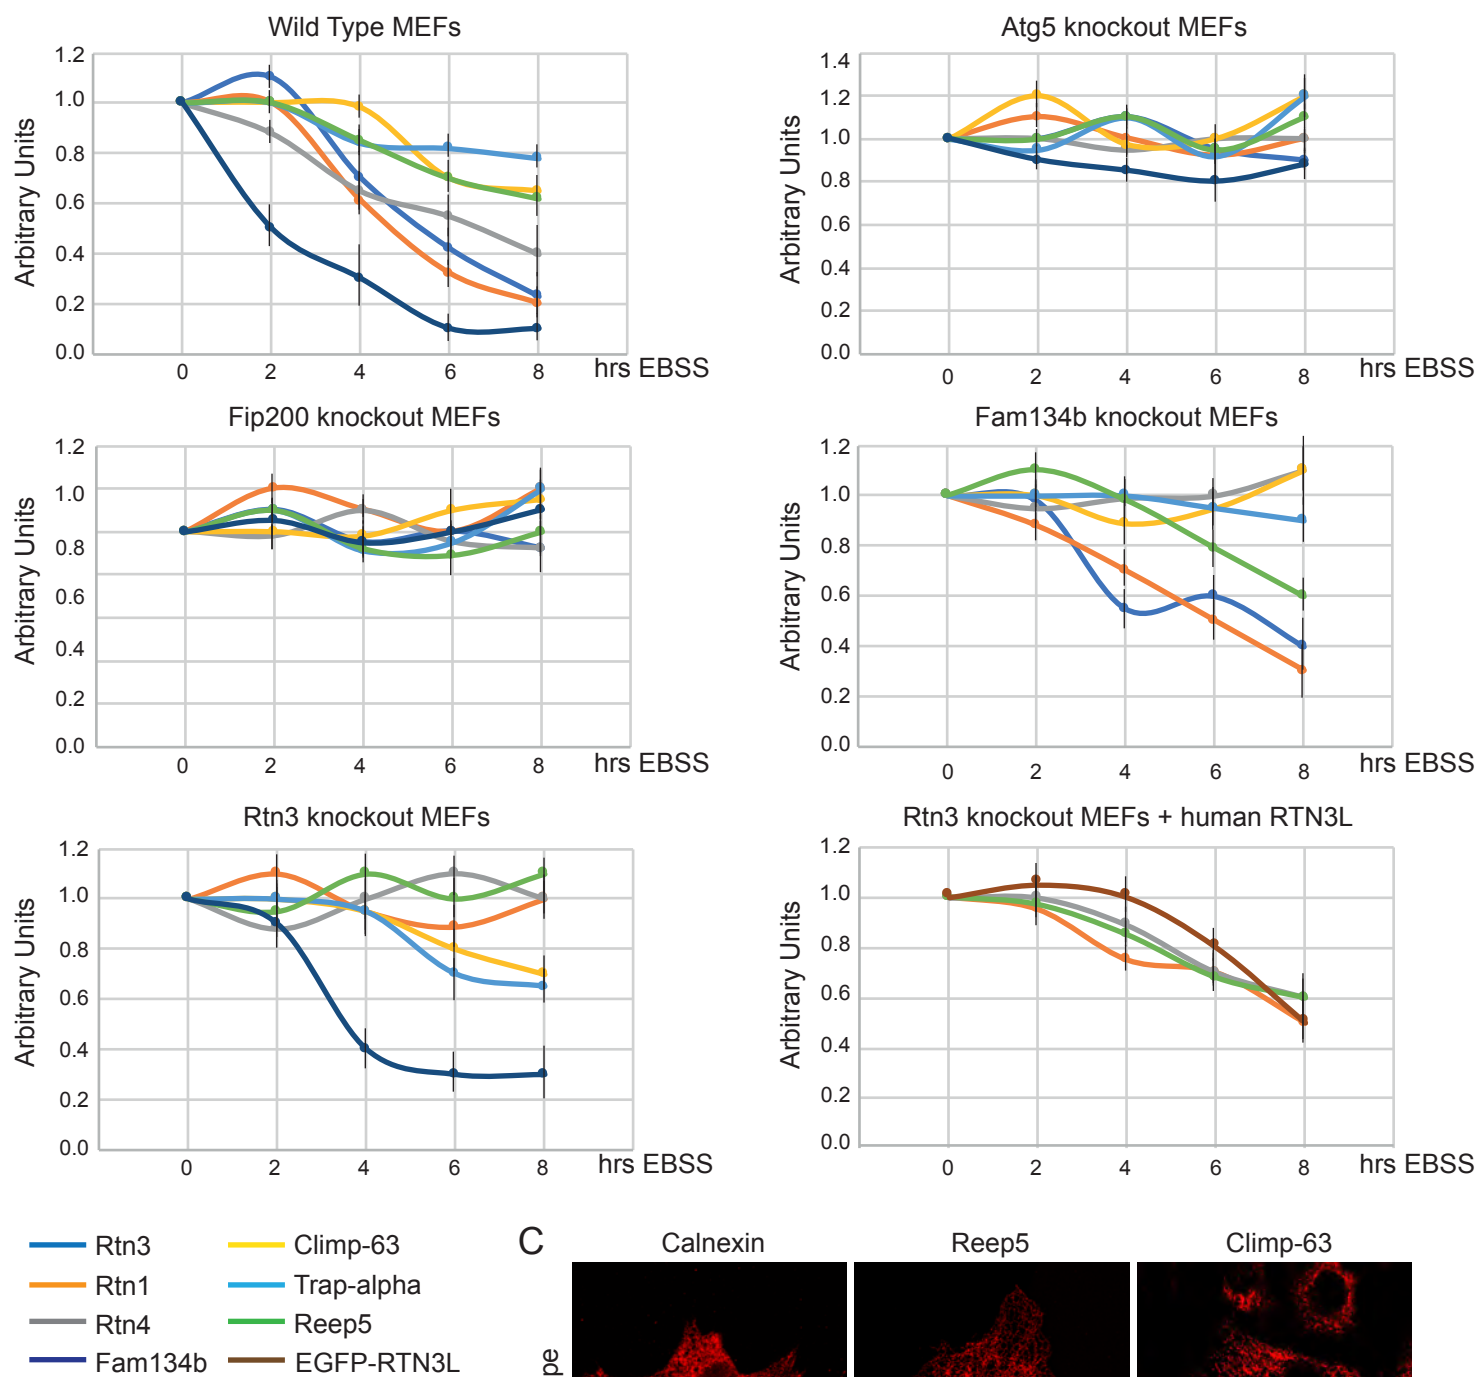

B

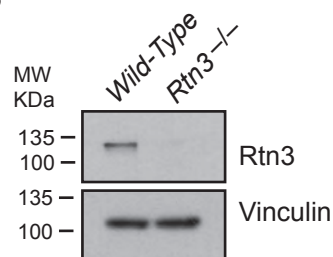

C

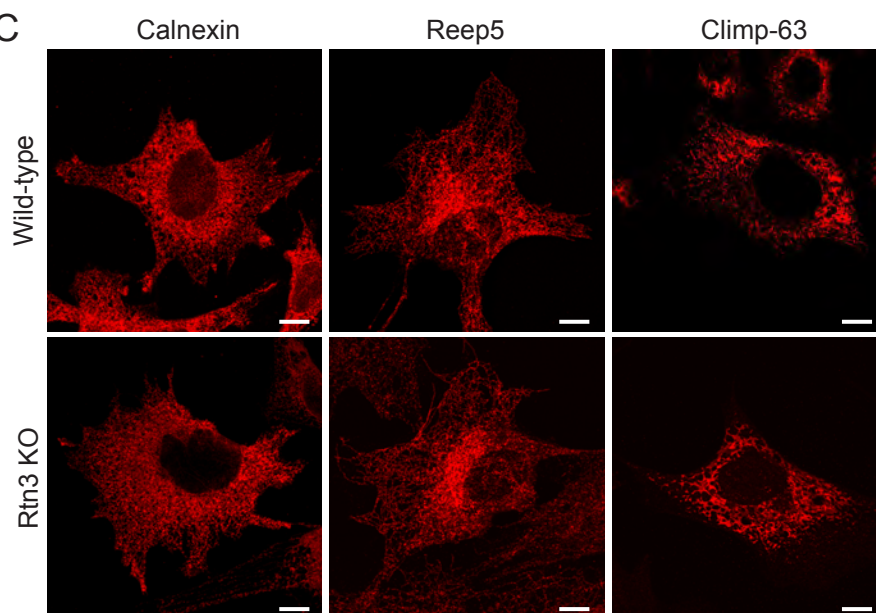

Figure 4 - figure supplement 1

Supplement: supp [file elife-25555-supp-v1.zip]

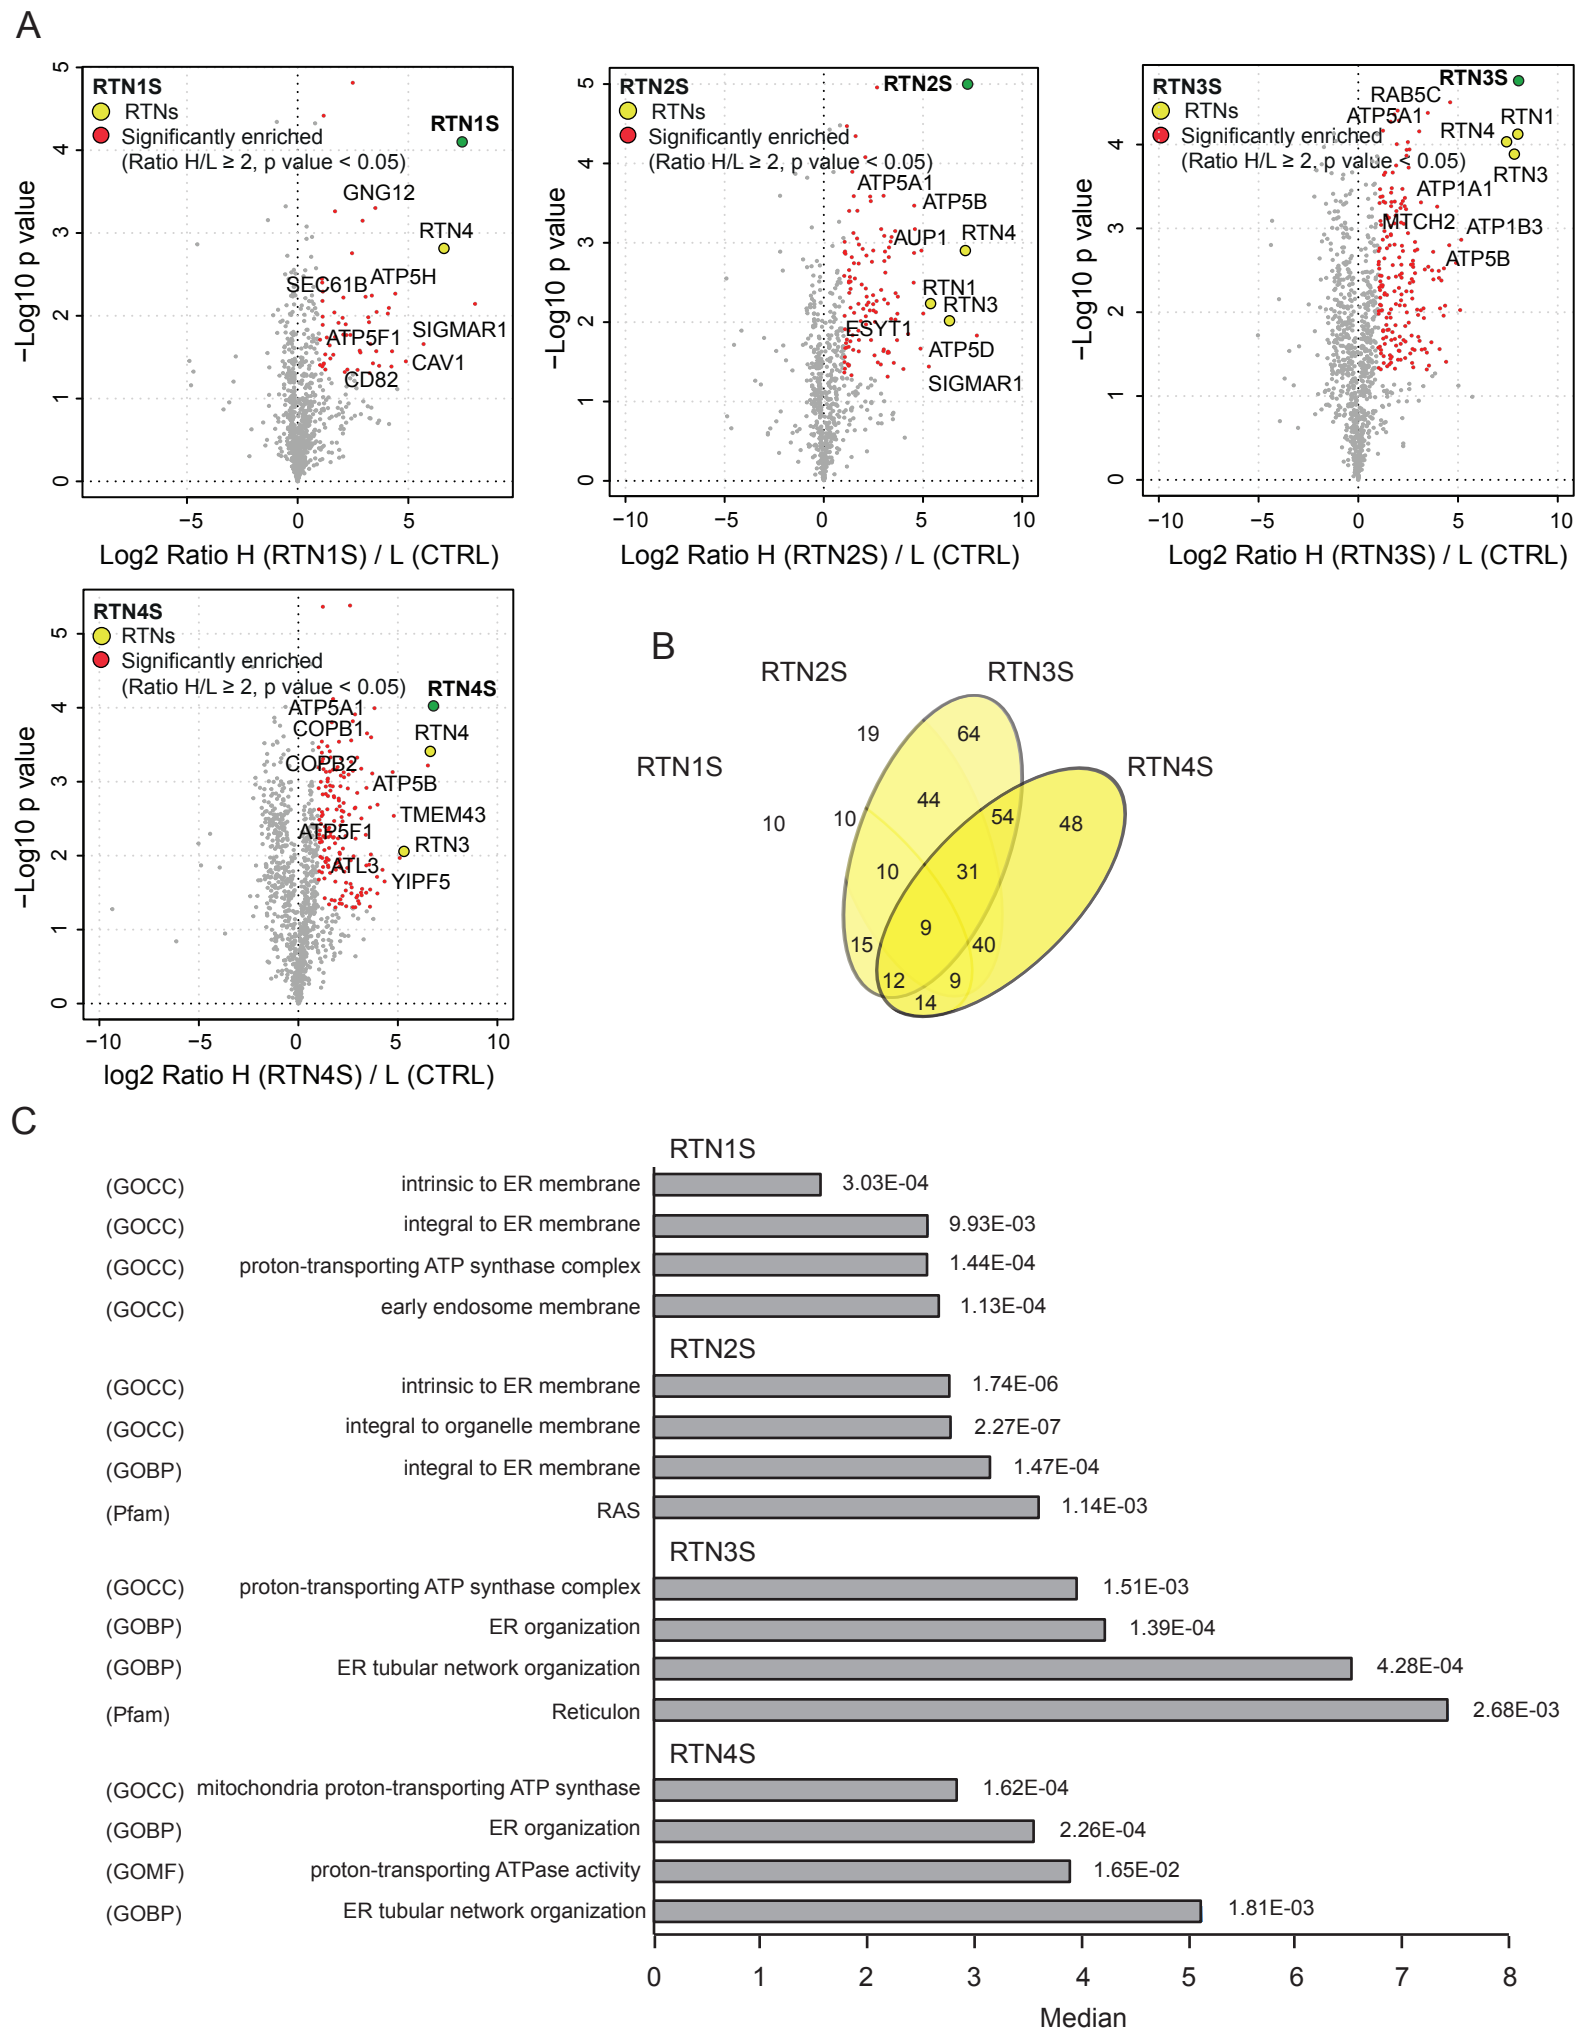

Figure 5 - figure supplement 2

Supplement: supp [file elife-25555-supp-v1.zip]

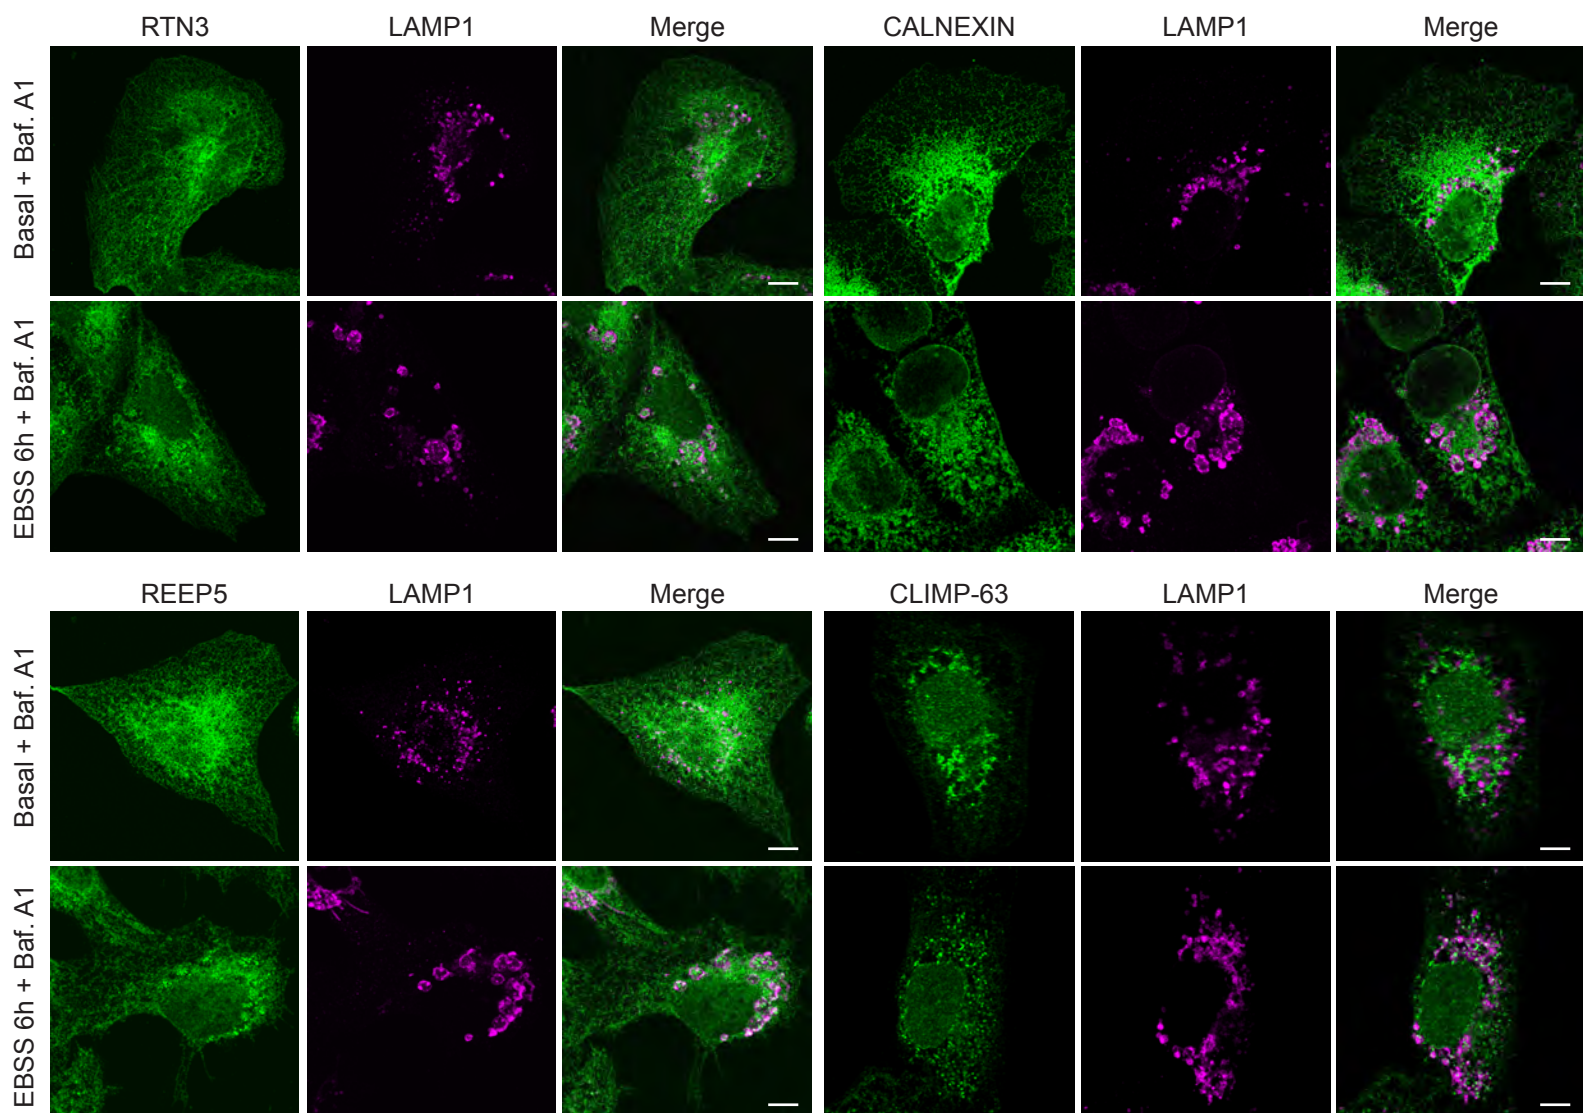

Figure 3 - figure supplement 1

Supplement: supp [file elife-25555-supp-v1.zip]

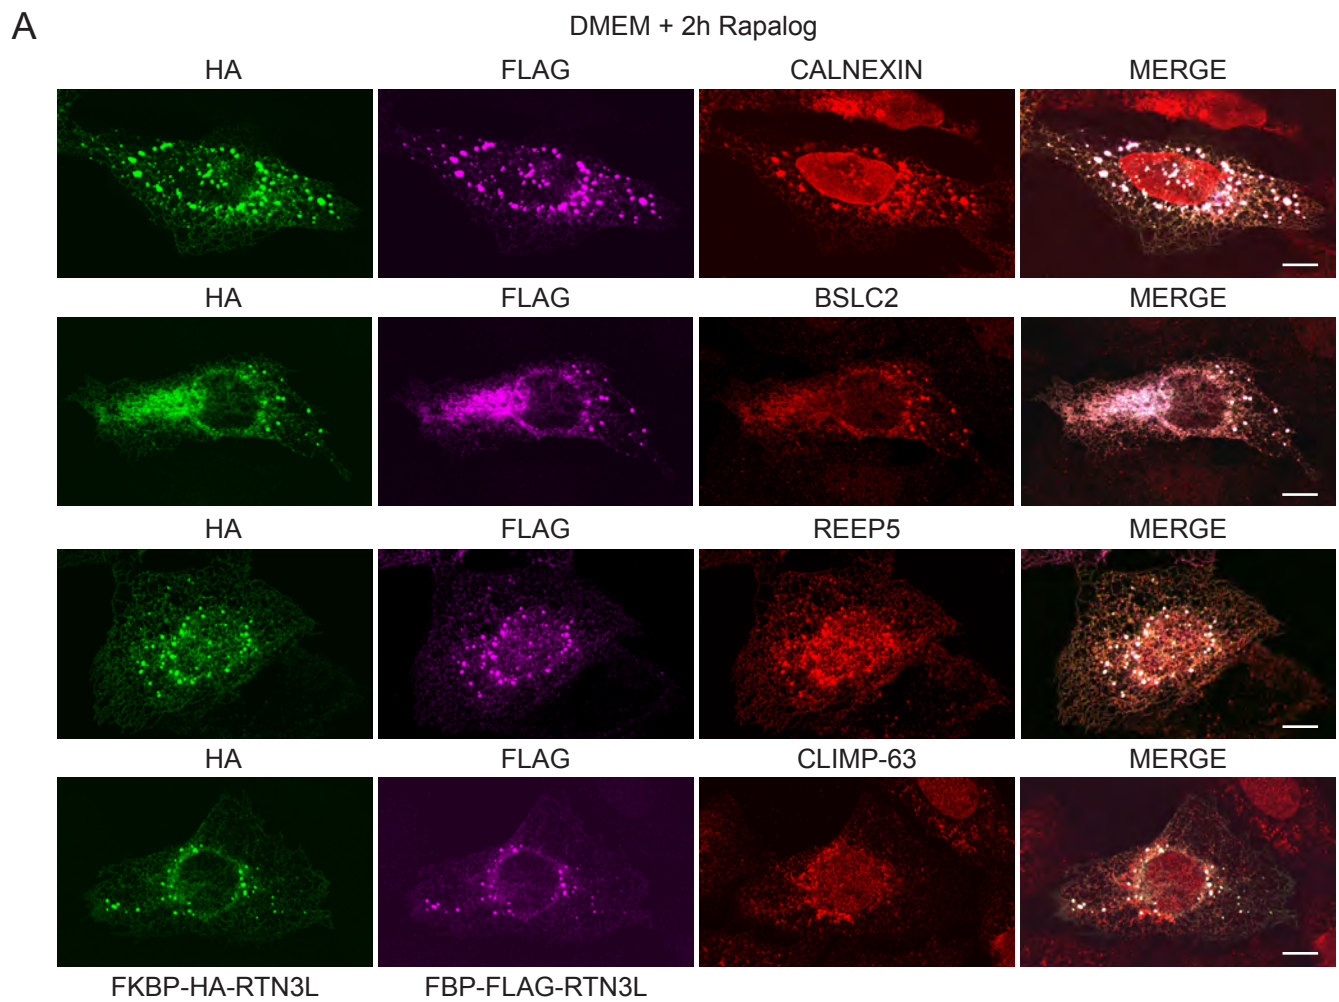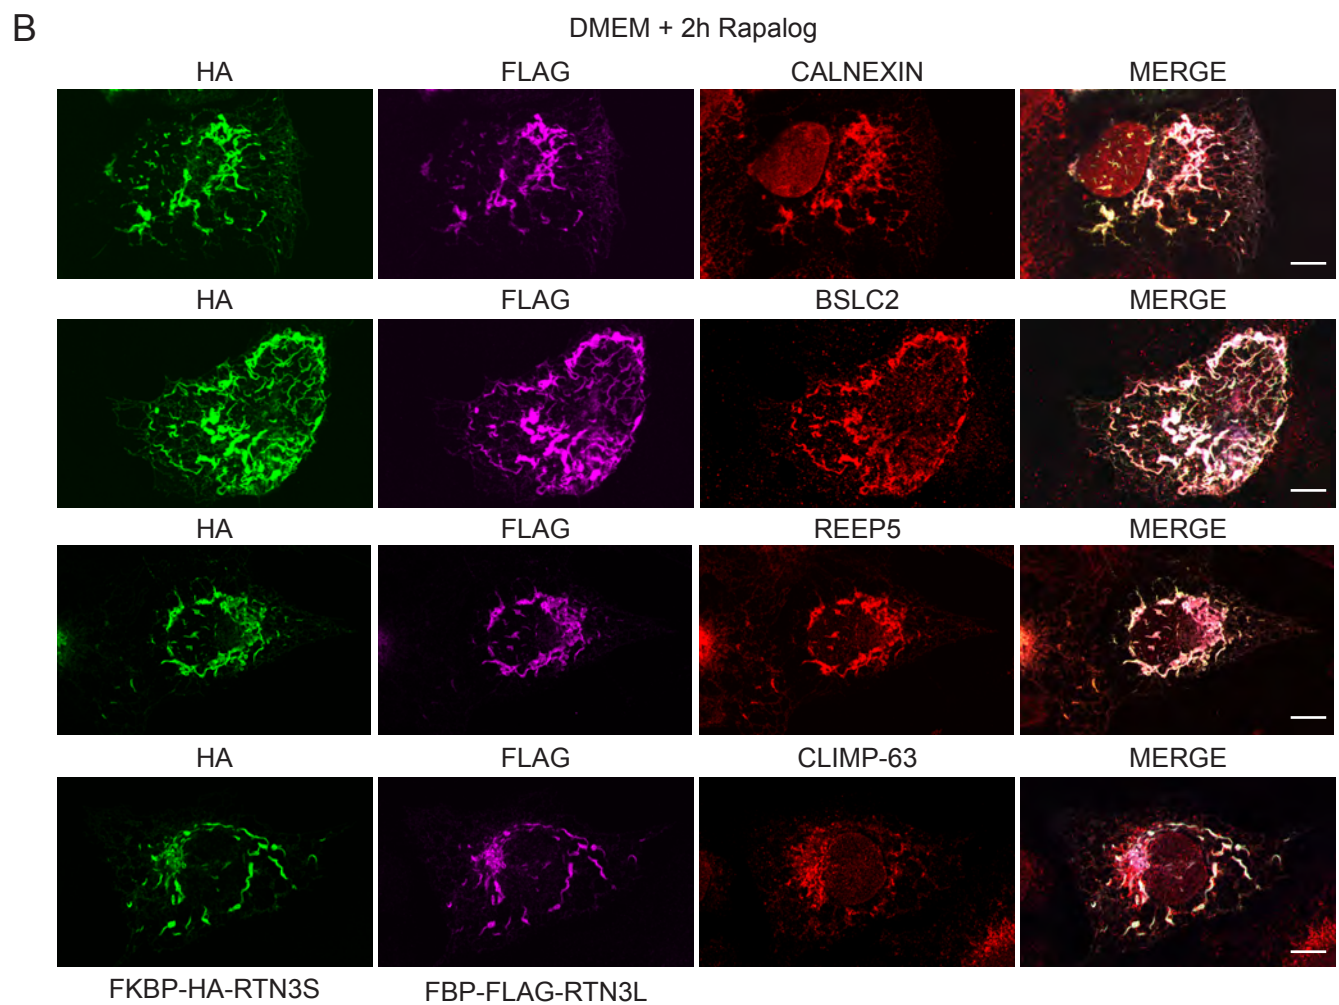

Figure 2 - figure supplement 2

Supplement: supp [file elife-25555-supp-v1.zip]

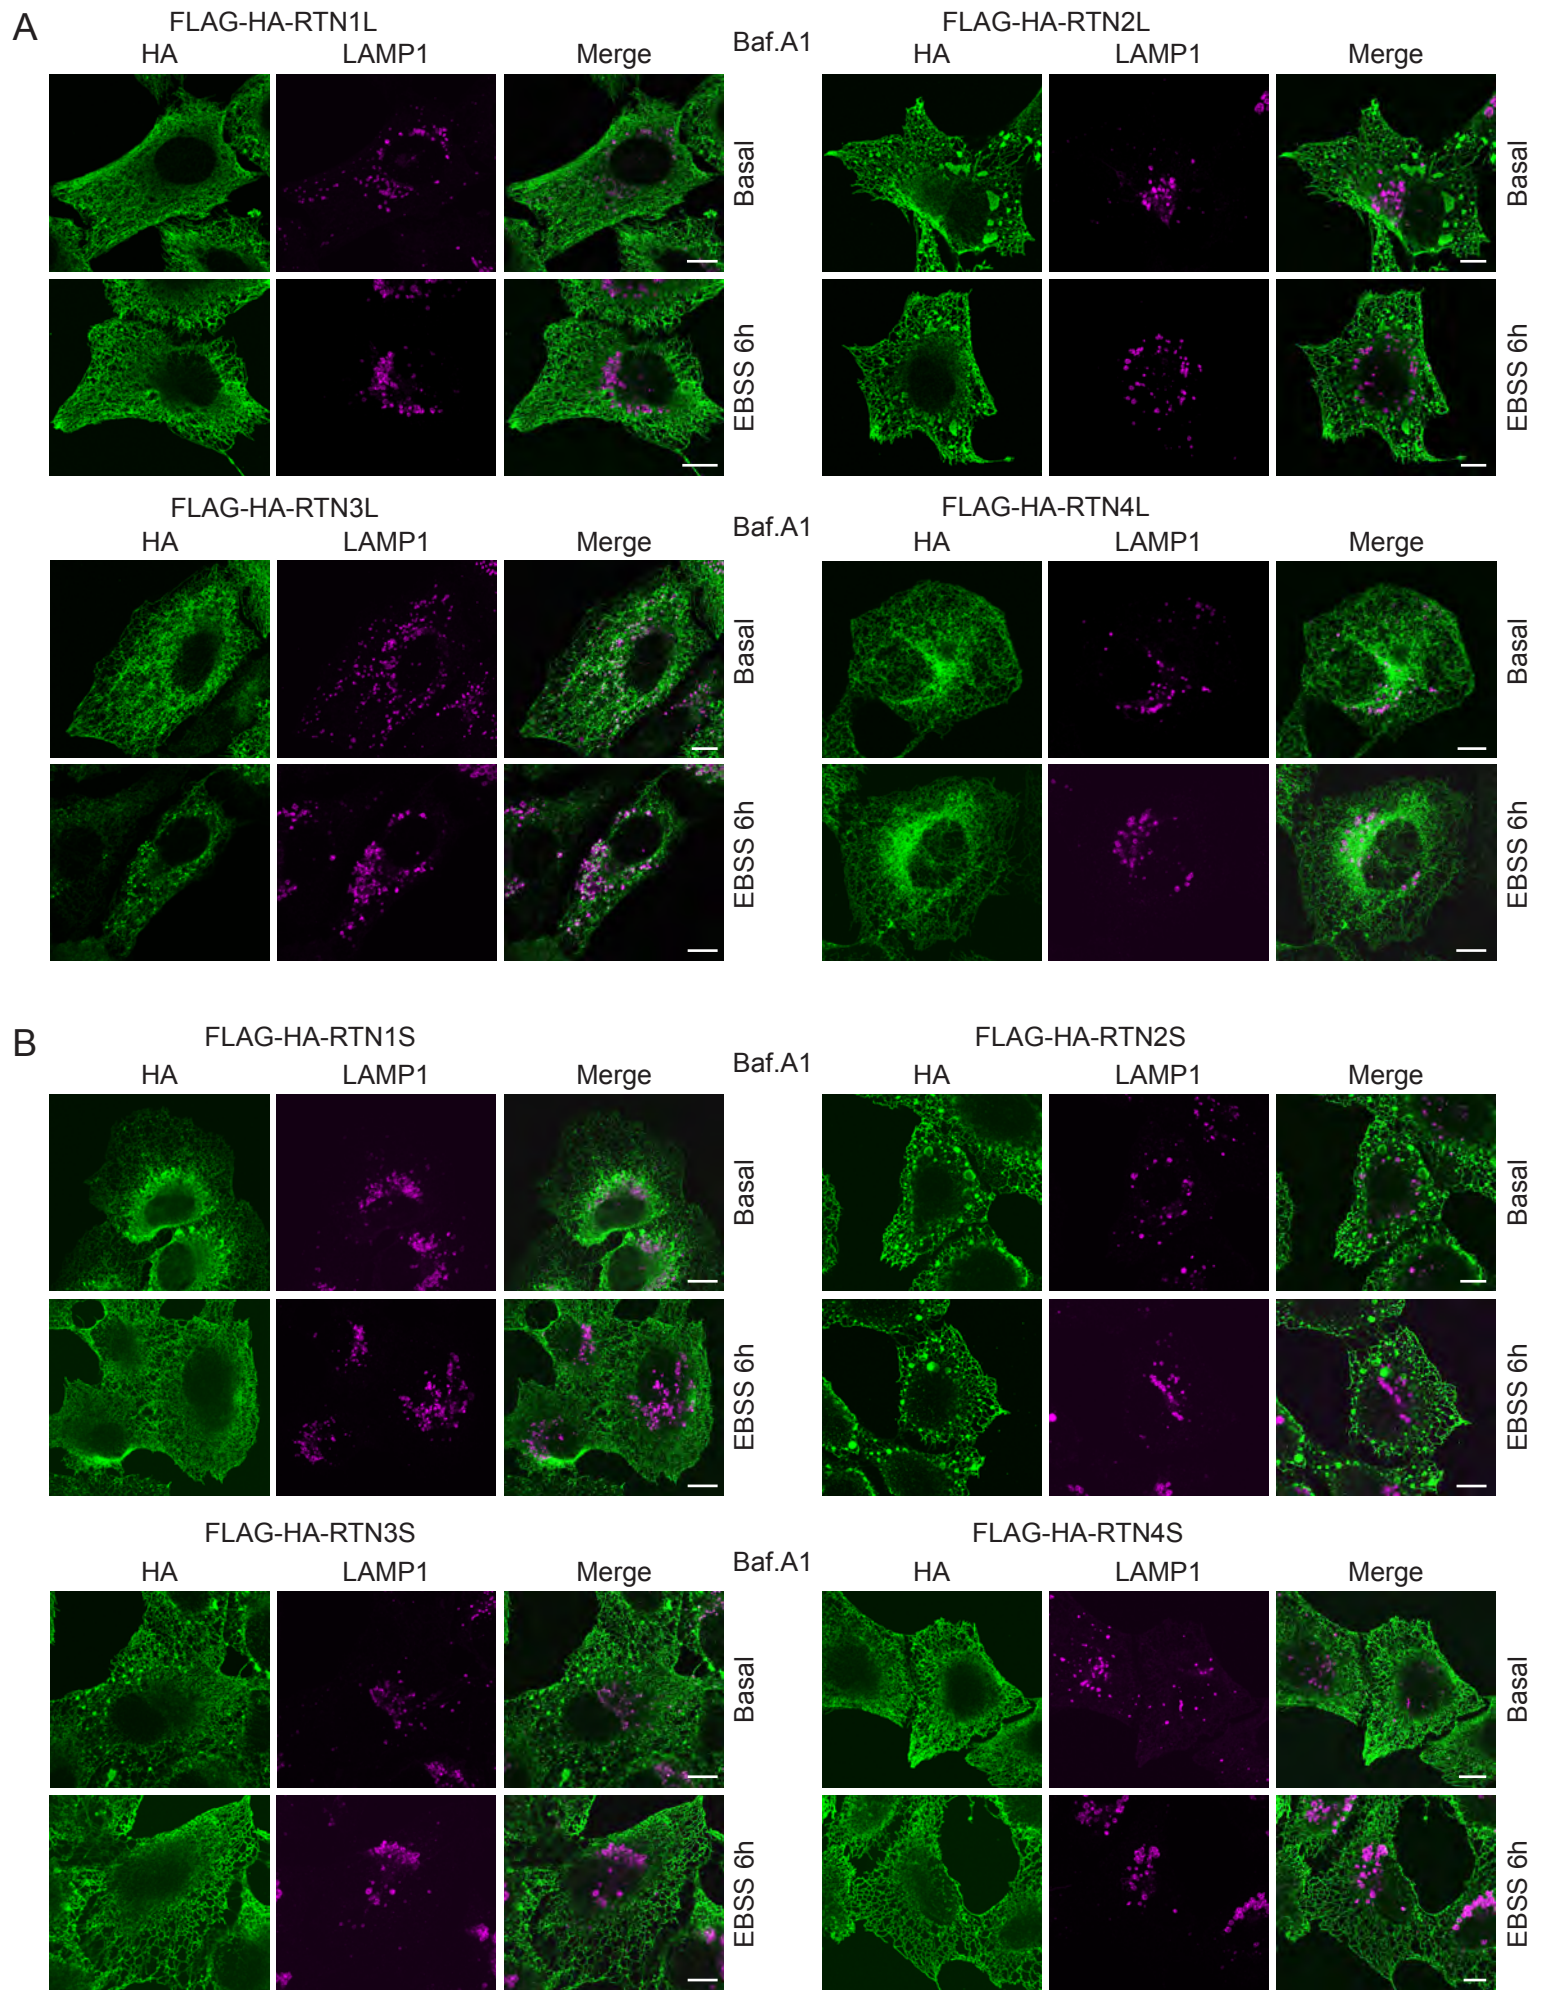

Supplement: supp [file elife-25555-supp-v1.zip]

A

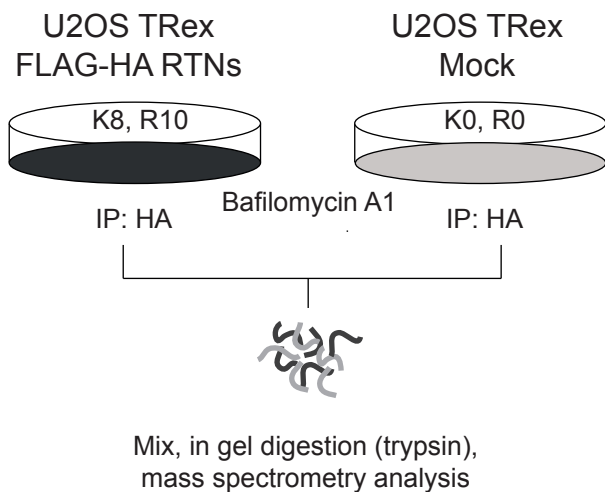

B

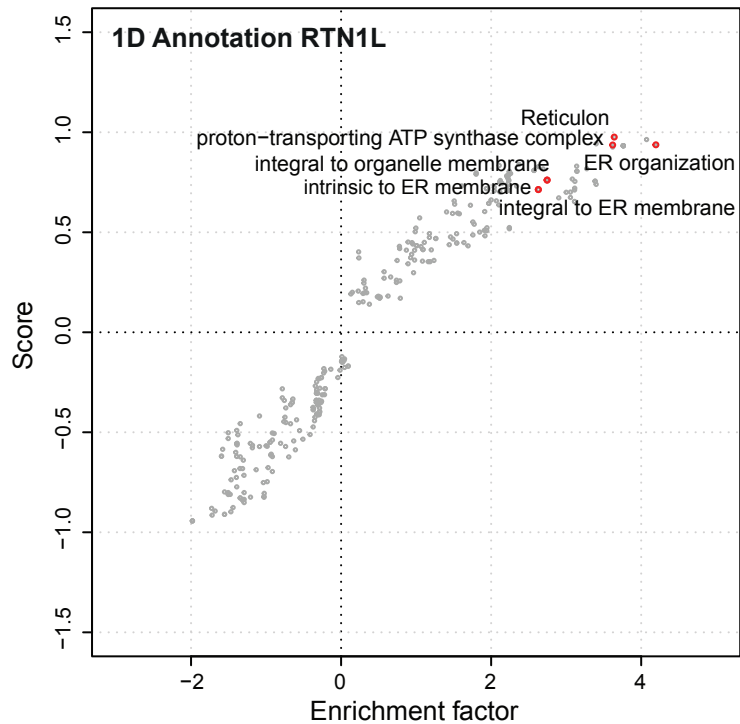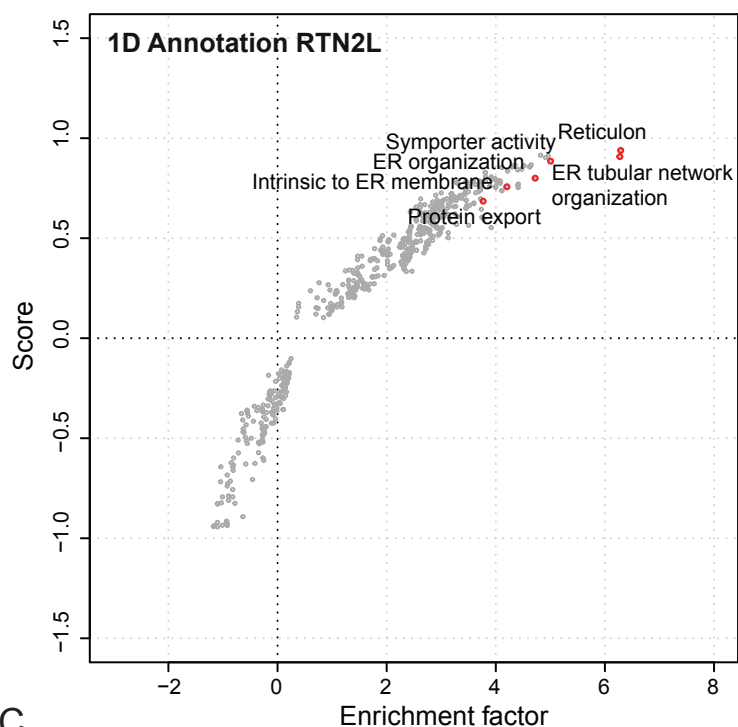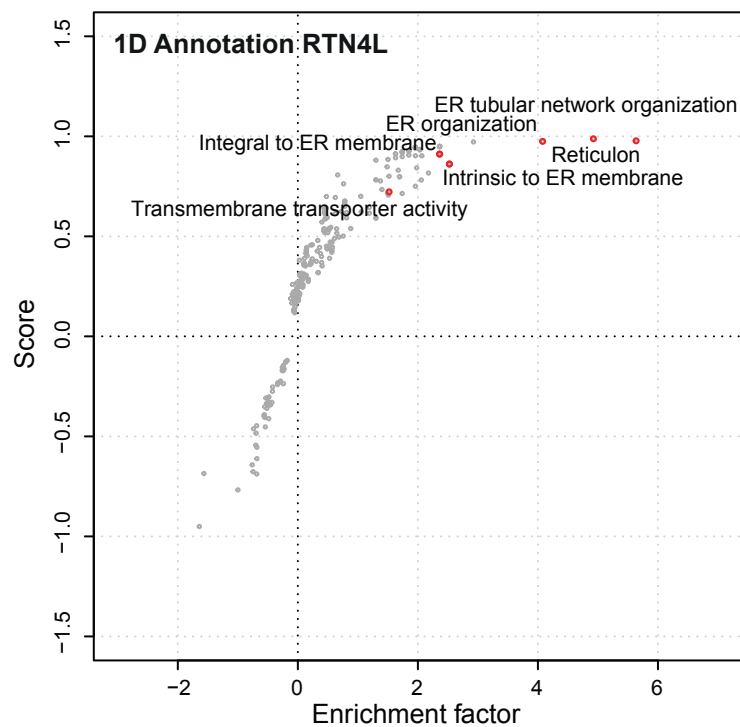

C

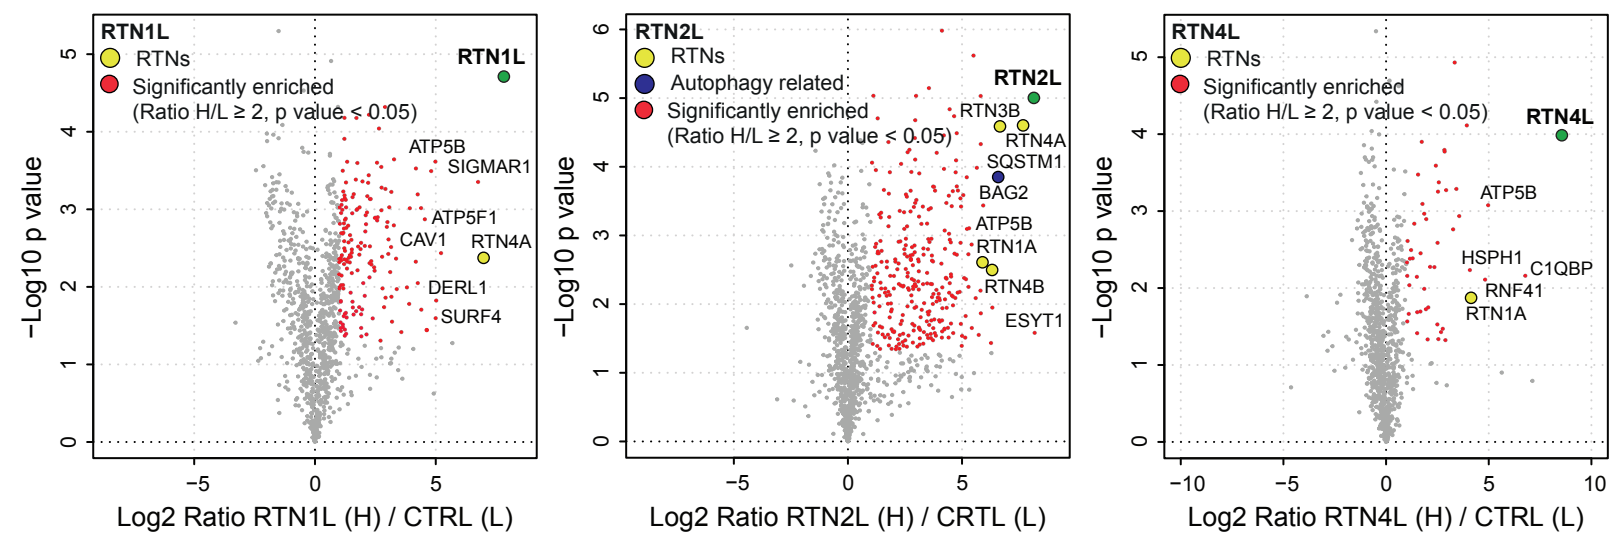

Figure 5 - figure supplement 1

Supplement: supp [file elife-25555-supp-v1.zip]

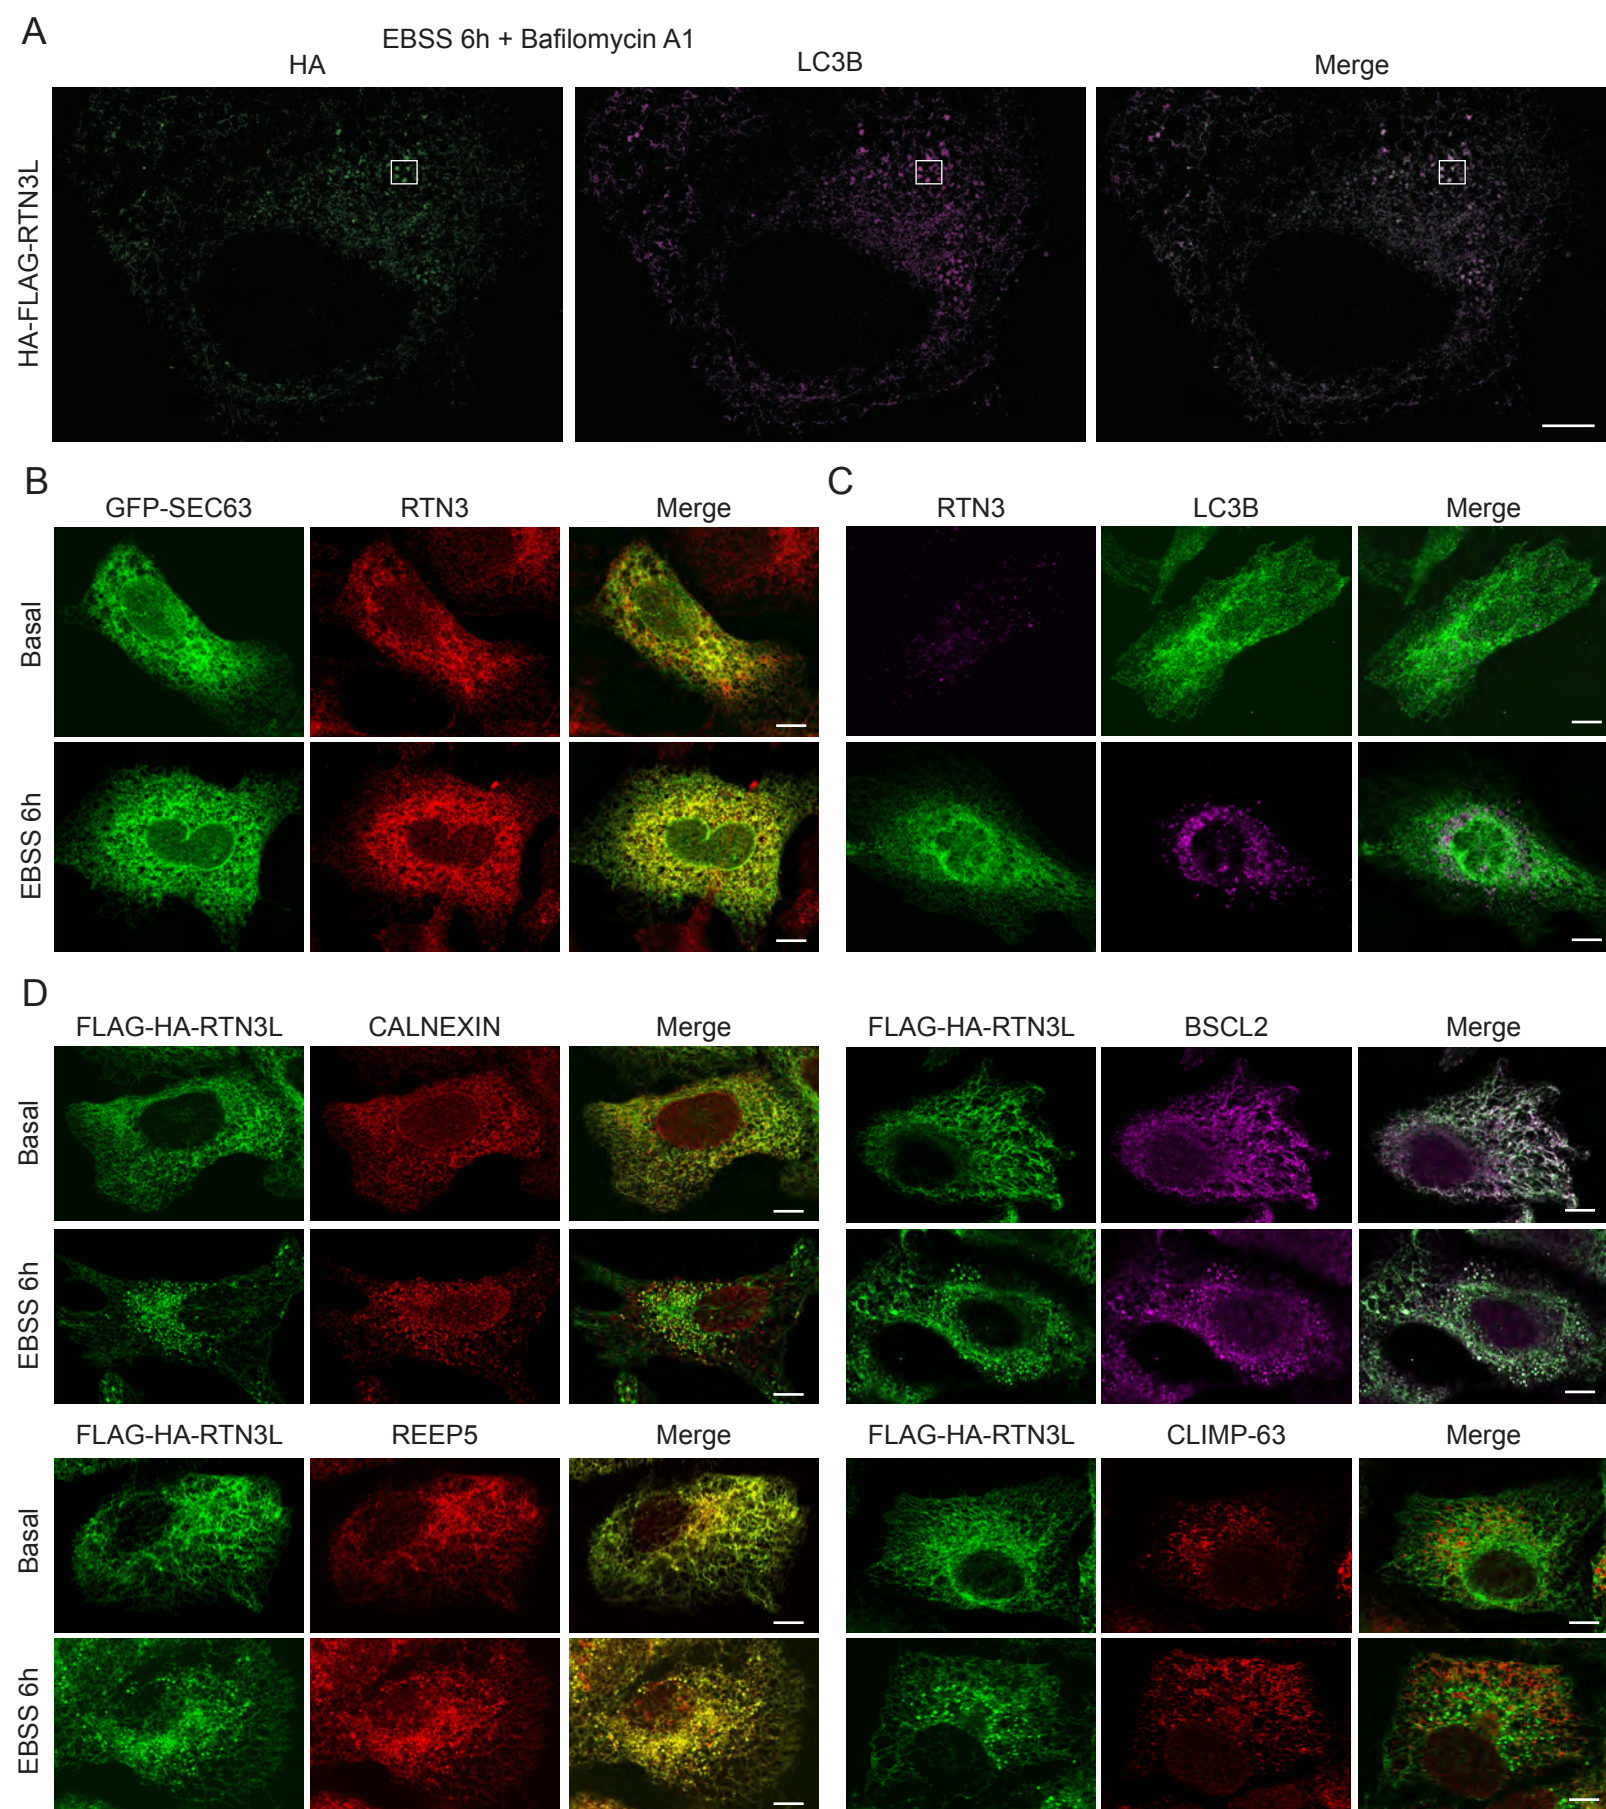

Figure 1 - figure supplement 5

Supplement: supp [file elife-25555-supp-v1.zip]

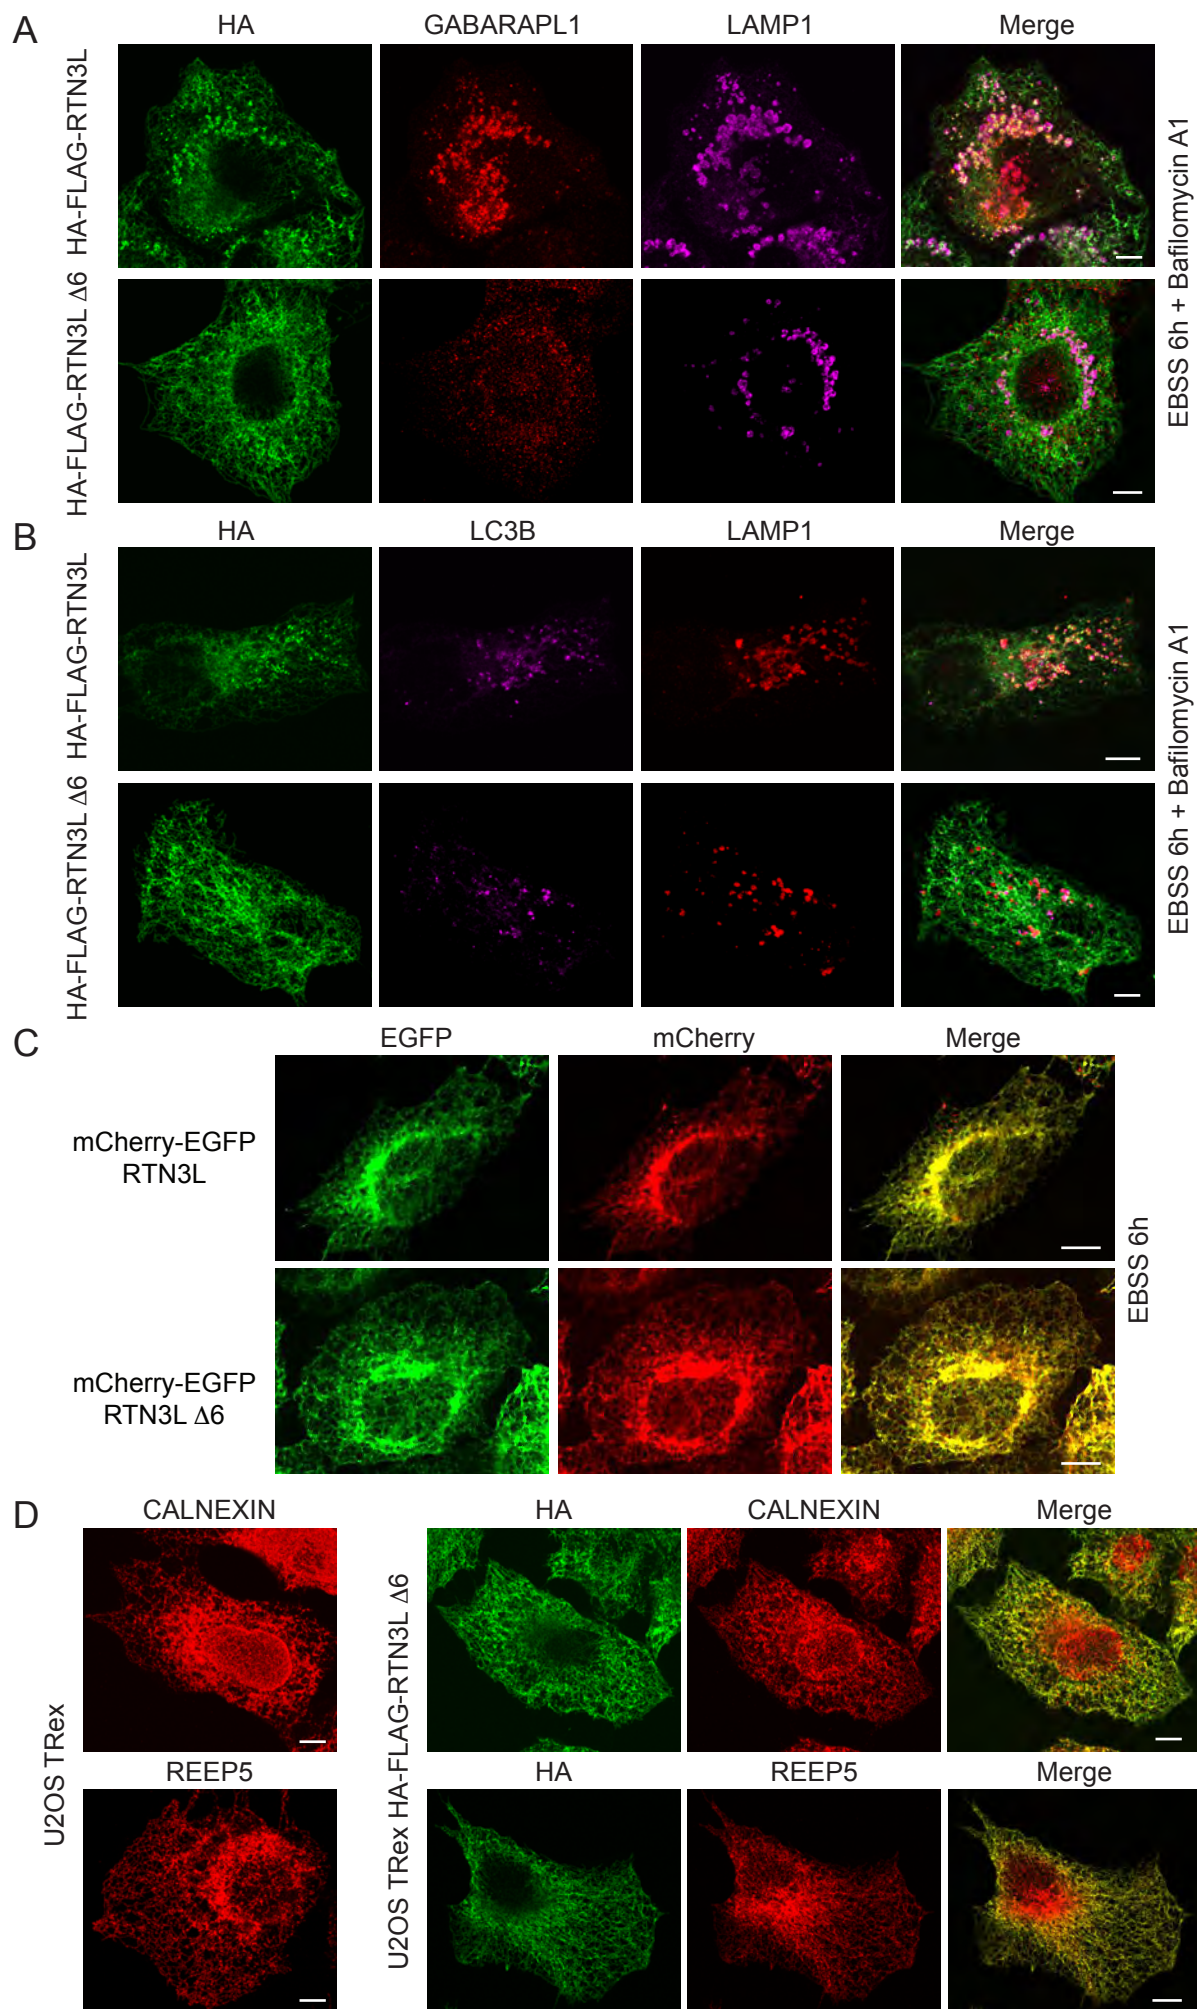

Figure 6 - figure supplement 2

Supplement: supp [file elife-25555-supp-v1.zip]
